# Supplementary material for: Membrane-mediated dimerization potentiates PIP5K lipid kinase activity
Source: eLife. 2022 Aug 17;11:e73747. doi: 10.7554/eLife.73747 (PMC9470164; doi:10.7554/eLife.73747)
Supplement: Figure 1—figure supplement 1—source data 1. [file elife-73747-fig1-figsupp1-data1.xlsx]

## Sheet: Figure 1 - Fig Supp 1
Figure 1 - Figure Supplement 1
Figure S1A			Figure S1B			Figure S1B			Figure S1C			Figure S1C			Figure S1C
SIGMA MW standards			1 mg/mL BSA, injection 1			1 mg/mL BSA, injection			PIP4KB			zPIP5KA			zPIP5KA (D84R)
mL (vol)	mAU		mL (vol)	mAU		mL (vol)	mAU		mL (vol)	mAU		mL (vol)	mAU		mL (vol)	mAU
0	23.6585		0	0.15		0	51.81		0	1.116		0	0.333		0	0.405
0.05	14.7085		0.03	0.85		0.03	51.08		0.0322811	0.988		0.026642	0		0.0334287	0.342
0.1	5.3085		0.06	-0.31		0.07	52.55		0.0645623	1.113		0.0532839	0.378		0.0668574	0.458
0.15	9.4285		0.09	-0.38		0.1	51.99		0.0968434	1.084		0.0799259	0.646		0.100286	0.409
0.19	11.3485		0.11	1.79		0.13	50.77		0.129125	1.17		0.106568	0.141		0.133715	0.912
0.24	2.3585		0.14	3.23		0.17	52.86		0.161406	3.784		0.13321	0.477		0.167144	3.746
0.29	8.6485		0.17	9.49		0.2	53.3		0.193687	5.203		0.159852	0.621		0.200572	3.964
0.34	-0.4315		0.2	9.27		0.23	52.22		0.225968	4.23		0.186494	0.582		0.234001	3.603
0.39	-1.0215		0.23	8.78		0.27	51.84		0.258249	3.52		0.213136	0.846		0.26743	3.072
0.44	-3.6915		0.26	8.12		0.3	51.26		0.29053	3.078		0.239778	1.006		0.300858	2.771
0.49	-6.9715		0.29	9.32		0.33	51.43		0.322811	2.748		0.26642	1.223		0.334287	2.492
0.53	-9.5315		0.32	10.7		0.37	49.57		0.355093	2.494		0.293062	0.916		0.367716	2.351
0.58	-6.5915		0.34	9.06		0.4	50.58		0.387374	2.359		0.319704	0.665		0.401145	2.078
0.63	-5.9815		0.37	9.24		0.43	51.47		0.419655	2.224		0.346346	1.165		0.434573	1.931
0.68	-6.5715		0.4	10.05		0.47	49.94		0.451936	2.174		0.372988	1.276		0.468002	1.829
0.73	-5.5815		0.43	14.94		0.5	49.34		0.484217	1.962		0.39963	1.199		0.501431	1.718
0.78	-7.7615		0.46	14.87		0.53	48.78		0.516498	1.838		0.426272	1.253		0.53486	1.663
0.82	-7.8015		0.49	12.61		0.57	48.77		0.548779	1.763		0.452914	1.41		0.568288	1.547
0.87	-7.8415		0.52	17.68		0.6	48.15		0.58106	1.676		0.479556	1.551		0.601717	1.535
0.92	-5.6815		0.54	16.13		0.63	48		0.613342	1.601		0.506197	1.345		0.635146	1.474
0.97	-2.8915		0.57	16.64		0.67	47.17		0.645623	1.544		0.53284	1.557		0.668574	1.377
1.02	-9.2615		0.6	14.66		0.7	48.11		0.677904	1.498		0.559481	1.51		0.702003	1.38
1.07	-6.6815		0.63	13.72		0.73	47.87		0.710185	1.468		0.586123	1.756		0.735432	1.25
1.12	-10.9115		0.66	14.88		0.77	47.78		0.742466	1.298		0.612765	1.964		0.768861	1.202
1.16	-6.3515		0.69	21.46		0.8	47.83		0.774747	1.343		0.639407	1.943		0.802289	1.201
1.21	-21.7315		0.72	10.76		0.83	48.53		0.807029	1.316		0.666049	2.133		0.835718	1.139
1.26	-16.4215		0.75	14.41		0.87	48.28		0.83931	1.291		0.692691	1.837		0.869147	1.095
1.31	-14.0315		0.77	15.81		0.9	48.57		0.871591	1.24		0.719333	2.049		0.902575	0.956
1.36	-12.0615		0.8	13.48		0.93	49.13		0.903872	1.174		0.745975	2.076		0.936004	1.024
1.41	-16.4115		0.83	12.01		0.97	49.35		0.936153	1.27		0.772617	2.346		0.969433	0.971
1.46	-8.2615		0.86	11.72		1	45.85		0.968434	1.353		0.799259	2.752		1.00286	0.929
1.5	1.8485		0.89	9.38		1.03	46.43		1.00072	1.359		0.825901	2.711		1.03629	0.867
1.55	-16.3515		0.92	13.7		1.07	47.82		1.033	1.356		0.852543	2.757		1.06972	0.771
1.6	-10.4715		0.95	12.64		1.1	48.61		1.06528	1.206		0.879185	2.863		1.10315	0.786
1.65	-12.0915		0.97	10.16		1.13	47.81		1.09756	1.109		0.905827	2.884		1.13658	0.888
1.7	-13.9115		1	8.75		1.17	48.56		1.12984	1.059		0.932469	3.017		1.17	0.843
1.75	-13.3215		1.03	8.63		1.2	47.85		1.16212	1.131		0.959111	2.818		1.20343	0.691
1.79	-13.9515		1.06	8.42		1.23	48.07		1.1944	1.088		0.985753	3.043		1.23686	0.734
1.84	-16.2415		1.09	8.86		1.27	47.63		1.22668	1.034		1.01239	3.113		1.27029	0.693
1.89	-9.8215		1.12	10.72		1.3	43.65		1.25896	1.003		1.03904	2.975		1.30372	0.795
1.94	-12.5715		1.15	7.65		1.33	47.07		1.29125	1.008		1.06568	2.902		1.33715	0.674
1.99	-14.8015		1.18	9.79		1.37	47.43		1.32353	1.025		1.09232	2.958		1.37058	0.606
2.04	-11.2915		1.2	7.86		1.4	47.09		1.35581	0.979		1.11896	2.917		1.40401	0.601
2.09	-10.7315		1.23	7.13		1.43	47.86		1.38809	0.935		1.1456	2.973		1.43744	0.515
2.13	-7.9015		1.26	6.64		1.47	47.26		1.42037	0.873		1.17225	3.016		1.47086	0.479
2.18	-13.9915		1.29	7.64		1.5	47.49		1.45265	1.051		1.19889	2.955		1.50429	0.532
2.23	-11.4815		1.32	8.06		1.53	47.35		1.48493	0.999		1.22553	3.183		1.53772	0.509
2.28	-9.7815		1.35	6.97		1.57	47.42		1.51721	0.937		1.25217	3.066		1.57115	0.495
2.33	-17.4715		1.38	6.29		1.6	46.62		1.5495	0.965		1.27882	3.324		1.60458	0.532
2.38	-18.3515		1.4	6.75		1.63	47.67		1.58178	0.872		1.30546	3.238		1.63801	0.479
2.43	-12.9115		1.43	7.99		1.67	47.85		1.61406	0.869		1.3321	3.429		1.67144	0.49
2.47	-14.5515		1.46	7.37		1.7	47.39		1.64634	0.933		1.35874	3.584		1.70487	0.443
2.52	-15.4815		1.49	34.86		1.73	47.4		1.67862	0.871		1.38538	3.66		1.73829	0.35
2.57	-8.1515		1.52	8.04		1.77	47.28		1.7109	0.898		1.41202	3.667		1.77172	0.421
2.62	-2.2915		1.55	7.63		1.8	47.16		1.74318	0.841		1.43867	3.775		1.80515	0.409
2.67	-11.9315		1.58	7.75		1.83	47.26		1.77546	0.877		1.46531	3.791		1.83858	0.457
2.72	-8.9315		1.61	8.36		1.87	47.56		1.80774	0.848		1.49195	3.953		1.87201	0.464
2.76	-11.0515		1.63	8.02		1.9	47.46		1.84003	0.891		1.51859	4.056		1.90544	0.421
2.81	-9.3015		1.66	6.91		1.93	47.42		1.87231	0.902		1.54523	4.314		1.93887	0.436
2.86	-8.1815		1.69	8.16		1.97	47.3		1.90459	0.837		1.57188	4.304		1.97229	0.405
2.91	-0.2115		1.72	9.81		2	47.04		1.93687	0.913		1.59852	4.344		2.00572	0.382
2.96	-10.1015		1.75	6.65		2.03	47.5		1.96915	0.95		1.62516	4.969		2.03915	0.591
3.01	-10.9215		1.78	6.83		2.07	47.62		2.00143	0.962		1.6518	4.798		2.07258	0.498
3.06	-9.4615		1.81	9.17		2.1	47.3		2.03371	1.068		1.67844	4.919		2.10601	0.533
3.1	-4.1515		1.84	23.43		2.13	48.62		2.06599	1.026		1.70509	4.818		2.13944	0.552
3.15	-3.7915		1.86	10.07		2.17	43.11		2.09827	0.979		1.73173	4.806		2.17287	0.457
3.2	-4.4415		1.89	11.15		2.2	47.1		2.13056	1.016		1.75837	5.088		2.20629	0.494
3.25	-9.9815		1.92	9.58		2.23	47.28		2.16284	1.007		1.78501	5.17		2.23972	0.535
3.3	-0.2015		1.95	11.35		2.27	47.63		2.19512	0.935		1.81165	5.355		2.27315	0.403
3.35	-4.7715		1.98	12.81		2.3	47.07		2.2274	0.914		1.8383	5.729		2.30658	0.294
3.4	-8.0215		2.01	10.42		2.33	47.21		2.25968	0.838		1.86494	5.83		2.34001	0.302
3.44	-8.2715		2.04	19		2.37	44.85		2.29196	0.832		1.89158	5.928		2.37344	0.289
3.49	-4.4015		2.06	27.72		2.4	46.73		2.32424	0.678		1.91822	6.086		2.40687	0.266
3.54	-9.6915		2.09	8.42		2.43	46.62		2.35652	0.72		1.94486	6.233		2.4403	0.359
3.59	-9.1115		2.12	13.12		2.47	47.72		2.3888	0.846		1.97151	6.371		2.47372	0.323
3.64	-12.7215		2.15	10.57		2.5	47.14		2.42109	0.773		1.99815	6.454		2.50715	0.336
3.69	-11.5015		2.18	9.78		2.53	47.25		2.45337	0.711		2.02479	6.156		2.54058	0.305
3.74	-11.8615		2.21	10.29		2.57	40.5		2.48565	0.775		2.05143	6.525		2.57401	0.321
3.78	-9.7715		2.24	10.78		2.6	42.2		2.51793	0.71		2.07807	6.68		2.60744	0.289
3.83	-9.6315		2.27	10.4		2.63	46.55		2.55021	0.719		2.10472	6.657		2.64087	0.315
3.88	-18.3215		2.29	10.96		2.67	45.64		2.58249	0.728		2.13136	7.145		2.6743	0.268
3.93	-12.8515		2.32	11.15		2.7	44.35		2.61477	0.777		2.158	6.697		2.70773	0.336
3.98	-19.5215		2.35	9.63		2.73	45.69		2.64705	0.699		2.18464	7.056		2.74116	0.24
4.03	-15.6915		2.38	15.29		2.77	44.93		2.67934	0.763		2.21128	7.132		2.77458	0.298
4.07	-18.1715		2.41	12.47		2.8	45.17		2.71162	0.71		2.23793	7.305		2.80801	0.358
4.12	-18.7615		2.44	10.87		2.83	43.39		2.7439	0.752		2.26457	7.468		2.84144	0.289
4.17	-14.4615		2.47	10.44		2.87	45.65		2.77618	0.754		2.29121	7.609		2.87487	0.232
4.22	-18.3015		2.49	43.21		2.9	46.27		2.80846	0.798		2.31785	7.756		2.9083	0.255
4.27	-19.1115		2.52	41.96		2.93	40.31		2.84074	0.832		2.34449	8.065		2.94173	0.3
4.32	-16.4015		2.55	36.42		2.97	45.33		2.87302	0.719		2.37114	8.13		2.97516	0.396
4.37	-8.5915		2.58	34.92		3	43.94		2.9053	0.7		2.39778	8.165		3.00859	0.358
4.41	-19.1715		2.61	36.66		3.03	46.63		2.93758	0.626		2.42442	8.324		3.04201	0.363
4.46	-17.6415		2.64	36.38		3.07	46.52		2.96986	0.679		2.45106	8.51		3.07544	0.374
4.51	-17.3115		2.67	34.44		3.1	46.14		3.00215	0.919		2.4777	8.71		3.10887	0.31
4.56	-12.2315		2.7	38.4		3.13	46.63		3.03443	0.804		2.50434	8.821		3.1423	0.305
4.61	-17.6215		2.72	28.93		3.16	47.09		3.06671	0.743		2.53099	8.969		3.17573	0.413
4.66	-20.5615		2.75	31.94		3.2	45.5		3.09899	0.786		2.55763	9.188		3.20916	0.323
4.71	-18.5115		2.78	35.97		3.23	48.43		3.13127	0.674		2.58427	9.344		3.24259	0.265
4.75	-12.8515		2.81	36.36		3.26	46.3		3.16355	0.839		2.61091	9.351		3.27602	0.152
4.8	-17.4115		2.84	35.04		3.3	46.38		3.19583	0.806		2.63755	9.592		3.30944	0.16
4.85	-19.6715		2.87	35.26		3.33	46.06		3.22811	0.839		2.6642	9.854		3.34287	0.228
4.9	-18.5115		2.9	33.67		3.36	46.8		3.26039	0.789		2.69084	10.059		3.3763	0.244
4.95	-16.4415		2.92	35.84		3.4	47.77		3.29268	0.799		2.71748	10.159		3.40973	0.2
5	-19.9415		2.95	37.72		3.43	46.44		3.32496	0.653		2.74412	10.257		3.44316	0.184
5.04	-19.0015		2.98	36.32		3.46	46.6		3.35724	0.558		2.77076	10.131		3.47659	0.225
5.09	-20.3915		3.01	35.37		3.5	47.68		3.38952	0.638		2.79741	10.42		3.51002	0.216
5.14	-19.9415		3.04	34.03		3.53	45.86		3.4218	0.638		2.82405	10.638		3.54344	0.246
5.19	-20.7015		3.07	34.71		3.56	46.69		3.45408	0.665		2.85069	10.992		3.57687	0.241
5.24	-21.1215		3.1	37.23		3.6	47.16		3.48636	0.679		2.87733	11.395		3.6103	0.238
5.29	-21.4315		3.13	36.36		3.63	47.87		3.51864	0.606		2.90397	11.466		3.64373	0.144
5.34	-22.9915		3.15	35.08		3.66	48.94		3.55092	0.592		2.93062	11.625		3.67716	0.213
5.38	-17.7915		3.18	36.2		3.7	49.92		3.58321	0.671		2.95726	11.807		3.71059	0.258
5.43	-20.0115		3.21	35.98		3.73	51.24		3.61549	0.673		2.9839	11.847		3.74402	0.202
5.48	-17.5715		3.24	37.83		3.76	51.91		3.64777	0.667		3.01054	12.082		3.77745	0.151
5.53	-22.0015		3.27	36.55		3.8	53.07		3.68005	0.631		3.03719	12.168		3.81087	0.18
5.58	-20.6915		3.3	35.37		3.83	53.18		3.71233	0.761		3.06383	12.269		3.8443	0.235
5.63	-24.2615		3.33	35.57		3.86	54.26		3.74461	0.699		3.09047	12.344		3.87773	0.373
5.68	-23.9315		3.35	42.58		3.9	55.08		3.77689	0.548		3.11711	12.341		3.91116	0.357
5.72	-21.6915		3.38	43.09		3.93	55.68		3.80918	0.647		3.14375	12.222		3.94459	0.387
5.77	-19.0515		3.41	38.46		3.96	55.48		3.84146	0.638		3.1704	12.537		3.97802	0.347
5.82	-17.1015		3.44	37.61		4	54.6		3.87374	0.592		3.19704	12.493		4.01145	0.369
5.87	-22.0715		3.47	39.1		4.03	51.75		3.90602	0.608		3.22368	12.597		4.04488	0.376
5.92	-19.3815		3.5	40.41		4.06	51.1		3.9383	0.637		3.25032	12.627		4.0783	0.358
5.97	-20.9715		3.53	40.66		4.1	52.5		3.97058	0.557		3.27696	12.825		4.11173	0.211
6.02	-21.8215		3.56	41.46		4.13	53.58		4.00286	0.639		3.30361	12.791		4.14516	0.207
6.06	-17.9815		3.58	45.15		4.16	53.86		4.03514	0.77		3.33025	12.975		4.17859	0.153
6.11	-23.0815		3.61	42.92		4.2	53.23		4.06742	0.813		3.35689	13.221		4.21202	0.222
6.16	-17.8315		3.64	40.33		4.23	55.13		4.09971	0.777		3.38353	13.344		4.24545	0.179
6.21	-18.3815		3.67	40.1		4.26	56.45		4.13199	0.718		3.41017	13.982		4.27888	0.153
6.26	-19.1815		3.7	38.75		4.3	55.95		4.16427	0.782		3.43682	13.454		4.31231	0.157
6.31	-19.6615		3.73	39.06		4.33	56.52		4.19655	0.77		3.46346	13.536		4.34573	0.202
6.35	-18.0215		3.76	39.64		4.36	55.85		4.22883	0.743		3.4901	13.758		4.37916	0.199
6.4	-21.3815		3.78	37.27		4.4	55.85		4.26111	0.743		3.51674	13.84		4.41259	0.187
6.45	-19.8315		3.81	35.16		4.43	56.09		4.29339	0.645		3.54338	13.975		4.44602	0.088
6.5	-21.4815		3.84	37.41		4.46	55.79		4.32567	0.666		3.57002	14.149		4.47945	0.181
6.55	-19.4315		3.87	33.87		4.5	55.29		4.35795	0.583		3.59667	14.169		4.51288	0.12
6.6	-19.7515		3.9	36.49		4.53	56.43		4.39023	0.57		3.62331	14.265		4.54631	0.157
6.65	-18.0015		3.93	34.86		4.56	52.98		4.42252	0.502		3.64995	14.267		4.57974	0.167
6.69	-16.8415		3.96	35.71		4.6	54.8		4.4548	0.581		3.67659	14.481		4.61316	0.138
6.74	-19.2915		3.99	35.6		4.63	53.81		4.48708	0.548		3.70323	14.537		4.64659	0.183
6.79	-20.5615		4.01	37.33		4.66	54.92		4.51936	0.548		3.72988	14.786		4.68002	0.161
6.84	-18.5315		4.04	34.27		4.7	54.67		4.55164	0.521		3.75652	14.878		4.71345	0.085
6.89	-17.5615		4.07	32.94		4.73	55.14		4.58392	0.605		3.78316	14.916		4.74688	0.141
6.94	-14.0215		4.1	32.39		4.76	55.17		4.6162	0.55		3.8098	15.057		4.78031	0.164
6.99	-22.8015		4.13	33.36		4.8	54.14		4.64848	0.545		3.83644	14.89		4.81374	0.219
7.03	-19.3115		4.16	33.65		4.83	52.47		4.68077	0.497		3.86309	15.236		4.84717	0.246
7.08	-24.5115		4.19	33.94		4.86	51.84		4.71305	0.54		3.88973	15.376		4.88059	0.227
7.13	-19.1815		4.21	32.7		4.9	52.26		4.74533	0.614		3.91637	15.524		4.91402	0.216
7.18	-18.3015		4.24	31.84		4.93	52.21		4.77761	0.554		3.94301	15.62		4.94745	0.248
7.23	-2.3115		4.27	33.22		4.96	52.98		4.80989	0.478		3.96965	15.729		4.98088	0.309
7.28	-16.6815		4.3	36.86		5	53.01		4.84217	0.531		3.9963	15.603		5.01431	0.233
7.32	-16.8115		4.33	35.43		5.03	52.05		4.87445	0.615		4.02294	15.66		5.04774	0.056
7.37	-8.2015		4.36	35.36		5.06	52.42		4.90673	0.494		4.04958	15.628		5.08117	0.047
7.42	-7.9015		4.39	35.16		5.1	51.29		4.93901	0.496		4.07622	15.956		5.11459	0.084
7.47	-1.9815		4.42	33.68		5.13	54.09		4.9713	0.474		4.10286	15.804		5.14802	0.131
7.52	1.8285		4.44	34.93		5.16	53.28		5.00358	0.499		4.12951	15.968		5.18145	0.136
7.57	11.7985		4.47	34.66		5.2	53.96		5.03586	0.66		4.15615	16.083		5.21488	0.094
7.62	29.9985		4.5	32.79		5.23	53.39		5.06814	0.633		4.18279	16.101		5.24831	0.071
7.66	60.5685		4.53	35.85		5.26	54.24		5.10042	0.606		4.20943	15.762		5.28174	0.093
7.71	108.978		4.56	37.33		5.3	53.41		5.1327	0.67		4.23607	15.789		5.31517	0.07
7.76	158.369		4.59	36.88		5.33	50.91		5.16498	0.574		4.26272	16.103		5.3486	0.142
7.81	208.899		4.62	35.6		5.36	53.28		5.19726	0.572		4.28936	16.056		5.38202	0.092
7.86	250.758		4.65	35.16		5.4	49.5		5.22954	0.535		4.316	16.274		5.41545	0.096
7.91	296.959		4.67	34.56		5.43	50.4		5.26183	0.622		4.34264	16.234		5.44888	0.067
7.96	325.378		4.7	35.49		5.46	48.67		5.29411	0.542		4.36928	16.493		5.48231	0.068
8	357.308		4.73	35.5		5.5	49.1		5.32639	0.557		4.39593	16.304		5.51574	0.055
8.05	378.788		4.76	32.56		5.53	48.59		5.35867	0.481		4.42257	16.261		5.54917	0.126
8.1	409.159		4.79	29.24		5.56	48.76		5.39095	0.439		4.44921	16.319		5.5826	0.051
8.15	426.909		4.82	33.21		5.6	46.43		5.42323	0.461		4.47585	16.424		5.61602	0.058
8.2	437.839		4.85	36.25		5.63	45.31		5.45551	0.575		4.50249	16.422		5.64945	0.125
8.25	476.568		4.87	36.01		5.66	48.1		5.48779	0.49		4.52914	16.447		5.68288	0.062
8.29	507.699		4.9	31.17		5.7	53.87		5.52008	0.49		4.55578	16.624		5.71631	0.24
8.34	619.918		4.93	31.84		5.73	50.21		5.55236	0.6		4.58242	16.652		5.74974	0.229
8.39	581.718		4.96	33.16		5.76	52.81		5.58464	0.421		4.60906	16.614		5.78317	0.159
8.44	633.548		4.99	33.36		5.8	52.75		5.61692	0.46		4.6357	16.524		5.8166	0.221
8.49	664.649		5.02	34.96		5.83	49.6		5.6492	0.487		4.66235	16.644		5.85003	0.27
8.54	674.359		5.05	35.88		5.86	50.93		5.68148	0.484		4.68899	16.688		5.88345	0.232
8.59	673.979		5.08	36.42		5.9	50.68		5.71376	0.537		4.71563	16.683		5.91688	0.201
8.63	686.479		5.1	37.98		5.93	52.28		5.74604	0.441		4.74227	16.893		5.95031	0.091
8.68	738.989		5.13	38.2		5.96	51.14		5.77832	0.473		4.76891	16.992		5.98374	0.025
8.73	641.958		5.16	37.63		6	49.91		5.81061	0.471		4.79556	16.956		6.01717	0.114
8.78	615.629		5.19	37.42		6.03	51.56		5.84289	0.446		4.8222	17.06		6.0506	0.031
8.83	586.399		5.22	38.65		6.06	48.69		5.87517	0.556		4.84884	17.002		6.08403	0.065
8.88	562.198		5.25	38.09		6.1	50.23		5.90745	0.512		4.87548	16.872		6.11746	0.111
8.93	538.369		5.28	36.03		6.13	49.2		5.93973	0.498		4.90212	17.554		6.15088	0
8.97	595.139		5.3	34.13		6.16	51.82		5.97201	0.42		4.92877	17.708		6.18431	0.057
9.02	479.469		5.33	35.42		6.2	49.05		6.00429	0.507		4.95541	17.618		6.21774	0.092
9.07	449.509		5.36	35.51		6.23	49		6.03657	0.438		4.98205	17.552		6.25117	0.091
9.12	422.139		5.39	38.39		6.26	46.77		6.06885	0.672		5.00869	17.588		6.2846	0.021
9.17	408.009		5.42	37.4		6.3	49.32		6.10114	0.622		5.03533	17.527		6.31803	0.028
9.22	398.818		5.45	34.22		6.33	46.73		6.13342	0.623		5.06198	17.576		6.35146	0.041
9.27	391.228		5.48	32.86		6.36	48.08		6.1657	0.665		5.08862	17.631		6.38489	0.082
9.31	370.589		5.51	35.51		6.4	49.43		6.19798	0.629		5.11526	17.627		6.41831	0.073
9.36	360.358		5.53	36.84		6.43	51.85		6.23026	0.618		5.1419	17.572		6.45174	0.085
9.41	356.738		5.56	38.5		6.46	52.41		6.26254	0.713		5.16854	17.643		6.48517	0.139
9.46	365.829		5.59	39.45		6.5	53.77		6.29482	0.658		5.19519	17.701		6.5186	0.129
9.51	357.029		5.62	38.21		6.53	52.44		6.3271	0.567		5.22183	17.629		6.55203	0.151
9.56	352.318		5.65	35.5		6.56	52.07		6.35938	0.516		5.24847	17.616		6.58546	0.197
9.6	348.099		5.68	29.53		6.6	52.07		6.39167	0.658		5.27511	17.507		6.61889	0.217
9.65	342.308		5.71	32.6		6.63	52.65		6.42395	0.427		5.30175	17.57		6.65232	0.383
9.7	340.938		5.73	35.76		6.66	52.37		6.45623	0.546		5.32839	17.504		6.68574	0.383
9.75	341.318		5.76	34.97		6.7	51.88		6.48851	0.548		5.35504	17.413		6.71917	0.459
9.8	378.959		5.79	33.13		6.73	53.11		6.52079	0.539		5.38168	17.676		6.7526	0.594
9.85	332.099		5.82	39.2		6.76	53.4		6.55307	0.596		5.40832	17.72		6.78603	0.653
9.9	324.219		5.85	39.95		6.8	52.81		6.58535	0.598		5.43496	17.844		6.81946	0.755
9.94	313.409		5.88	37.77		6.83	48.99		6.61763	0.591		5.4616	17.668		6.85289	0.865
9.99	302.329		5.91	39.57		6.86	51.56		6.64992	0.709		5.48825	17.786		6.88632	0.995
10.04	291.488		5.94	38.08		6.9	51.66		6.6822	0.712		5.51489	17.733		6.91974	1.074
10.09	288.329		5.96	41.11		6.93	51.55		6.71448	0.695		5.54153	17.854		6.95317	1.266
10.14	277.978		5.99	39.85		6.96	50.9		6.74676	0.882		5.56817	17.846		6.9866	1.563
10.19	250.159		6.02	41.02		7	51.6		6.77904	0.839		5.59481	17.836		7.02003	1.831
10.24	244.668		6.05	42.58		7.03	51.38		6.81132	0.902		5.62146	17.816		7.05346	2.094
10.28	226.129		6.08	46.29		7.06	51.33		6.8436	1.077		5.6481	17.972		7.08689	2.556
10.33	215.059		6.11	43.79		7.1	52.02		6.87588	1.062		5.67474	17.923		7.12032	2.958
10.38	200.048		6.14	43.35		7.13	49.98		6.90816	1.094		5.70138	17.969		7.15375	3.343
10.43	204.279		6.16	43.25		7.16	51.82		6.94045	1.293		5.72802	17.936		7.18717	3.728
10.48	182.388		6.19	43.9		7.2	50.96		6.97273	1.391		5.75467	18.028		7.2206	4.312
10.53	178.819		6.22	43.62		7.23	51.46		7.00501	1.48		5.78131	18.187		7.25403	4.68
10.57	179.418		6.25	46.2		7.26	50.83		7.03729	1.553		5.80795	18.131		7.28746	5.132
10.62	177.999		6.28	47.57		7.3	51.96		7.06957	1.774		5.83459	18.121		7.32089	5.551
10.67	181.798		6.31	48.22		7.33	51.85		7.10185	2		5.86123	17.995		7.35432	5.8
10.72	189.578		6.34	47.57		7.36	51.35		7.13413	2.135		5.88788	18.058		7.38775	6.155
10.77	196.798		6.37	48.37		7.4	51.08		7.16641	2.174		5.91452	18.323		7.42118	6.248
10.82	214.659		6.39	48.95		7.43	50.32		7.19869	2.311		5.94116	18.343		7.4546	6.409
10.87	233.589		6.42	46.79		7.46	49.55		7.23098	2.351		5.9678	18.433		7.48803	6.4
10.91	267.288		6.45	28.67		7.5	48.09		7.26326	2.557		5.99444	18.499		7.52146	6.353
10.96	301.469		6.48	5.51		7.53	47.79		7.29554	2.763		6.02109	18.297		7.55489	6.426
11.01	353.928		6.51	4.02		7.56	46.75		7.32782	2.707		6.04773	18.275		7.58832	6.388
11.06	386.219		6.54	7.63		7.6	45.43		7.3601	2.82		6.07437	18.363		7.62175	6.243
11.11	450.788		6.57	13.81		7.63	46.21		7.39238	2.995		6.10101	18.371		7.65518	5.994
11.16	520.078		6.59	0.2		7.66	47.2		7.42466	2.949		6.12765	18.312		7.68861	5.945
11.21	620.139		6.62	8.62		7.7	43.98		7.45694	3.025		6.1543	18.33		7.72203	5.718
11.25	678.249		6.65	11.33		7.73	45.25		7.48922	3.183		6.18094	18.376		7.75546	5.556
11.3	743.788		6.68	20.98		7.76	45.3		7.52151	3.058		6.20758	18.498		7.78889	5.332
11.35	882.048		6.71	27.84		7.8	46.58		7.55379	3.141		6.23422	18.801		7.82232	5.191
11.4	942.798		6.74	33.26		7.83	46.04		7.58607	3.102		6.26086	18.506		7.85575	4.947
11.45	1071.8		6.77	26.78		7.86	45.15		7.61835	3.062		6.28751	18.569		7.88918	4.8
11.5	1147.81		6.8	31.18		7.9	48.92		7.65063	3.008		6.31415	18.789		7.92261	4.651
11.55	1338.66		6.82	35		7.93	45.11		7.68291	3.071		6.34079	19.09		7.95604	4.513
11.59	1323.35		6.85	34.91		7.96	48.91		7.71519	2.933		6.36743	18.813		7.98946	4.401
11.64	1263.66		6.88	27		8	49.62		7.74747	2.862		6.39407	18.887		8.02289	4.364
11.69	1382.59		6.91	33.89		8.03	52.01		7.77975	2.807		6.42072	18.995		8.05632	4.348
11.74	1396.62		6.94	32.66		8.06	54.19		7.81204	2.608		6.44736	19.035		8.08975	4.243
11.79	1440.22		6.97	28.15		8.1	55.35		7.84432	2.504		6.474	19.106		8.12318	4.257
11.84	1494.87		7	31.2		8.13	56.66		7.8766	2.469		6.50064	19.238		8.15661	4.244
11.88	1377.2		7.02	32.8		8.16	58.55		7.90888	2.369		6.52728	19.288		8.19004	4.284
11.93	1382.52		7.05	28.69		8.2	59.69		7.94116	2.342		6.55392	19.412		8.22346	4.357
11.98	1307.42		7.08	32.23		8.23	60.24		7.97344	2.306		6.58057	19.485		8.25689	4.296
12.03	1264.44		7.11	31.57		8.26	63.71		8.00572	2.179		6.60721	19.48		8.29032	4.365
12.08	1305.44		7.14	31.85		8.3	65.31		8.038	2.178		6.63385	19.711		8.32375	4.456
12.13	1240.12		7.17	34.62		8.33	67.91		8.07029	2.2		6.66049	19.613		8.35718	4.461
12.18	1074.96		7.2	35.01		8.36	69.07		8.10257	2.394		6.68713	19.779		8.39061	4.526
12.22	956.249		7.23	35.7		8.4	71.7		8.13485	2.387		6.71378	19.978		8.42404	4.604
12.27	927.198		7.25	43.88		8.43	73.37		8.16713	2.394		6.74042	20.129		8.45747	4.629
12.32	885.759		7.28	42.91		8.46	75.44		8.19941	2.386		6.76706	20.444		8.4909	4.829
12.37	817.548		7.31	38.88		8.5	77.68		8.23169	2.489		6.7937	20.54		8.52432	4.92
12.42	757.869		7.34	37.82		8.53	80.51		8.26397	2.509		6.82034	20.753		8.55775	4.933
12.47	707.869		7.37	36.45		8.56	82.81		8.29625	2.569		6.84699	20.719		8.59118	5.033
12.52	657.218		7.4	33.04		8.6	84.97		8.32853	2.639		6.87363	20.893		8.62461	5.152
12.56	595.649		7.43	40.05		8.63	88.25		8.36082	2.571		6.90027	21.219		8.65804	5.179
12.61	578.239		7.46	42.23		8.66	90.66		8.3931	2.54		6.92691	21.533		8.69147	5.298
12.66	577.948		7.48	37.62		8.7	94.26		8.42538	2.56		6.95355	21.895		8.7249	5.443
12.71	524.548		7.51	44.93		8.73	96		8.45766	2.608		6.9802	22.335		8.75832	5.518
12.76	478.378		7.54	40.52		8.76	99.94		8.48994	2.762		7.00684	22.436		8.79175	5.598
12.81	465.329		7.57	41.42		8.8	102.45		8.52222	2.856		7.03348	22.805		8.82518	5.678
12.85	415.029		7.6	40.44		8.83	106.39		8.5545	2.935		7.06012	23.148		8.85861	5.861
12.9	393.779		7.63	36.11		8.86	110.76		8.58678	3.194		7.08676	23.476		8.89204	6.009
12.95	368.889		7.66	37.31		8.9	114.07		8.61906	3.29		7.11341	23.836		8.92547	6.249
13	354.399		7.68	43.66		8.93	118.17		8.65134	3.397		7.14005	24.611		8.9589	6.26
13.05	296.668		7.71	32.89		8.96	122.82		8.68363	3.655		7.16669	24.693		8.99233	6.481
13.1	293.868		7.74	30		9	126.58		8.71591	3.936		7.19333	25.327		9.02576	6.543
13.15	266.358		7.77	31.93		9.03	130.73		8.74819	4.271		7.21997	25.937		9.05918	6.839
13.19	249.268		7.8	33.8		9.06	133.76		8.78047	4.499		7.24662	26.74		9.09261	6.987
13.24	229.129		7.83	41.74		9.1	139.06		8.81275	4.724		7.27326	27.794		9.12604	7.156
13.29	219.429		7.86	39.88		9.13	144.2		8.84503	5.127		7.2999	28.777		9.15947	7.358
13.34	201.138		7.89	37.18		9.16	148.84		8.87731	5.544		7.32654	30.596		9.1929	7.491
13.39	188.749		7.91	25.18		9.2	153.79		8.90959	5.962		7.35318	32.756		9.22633	7.816
13.44	182.559		7.94	26.82		9.23	159.6		8.94188	6.523		7.37983	35.038		9.25976	8.087
13.49	181.038		7.97	30.48		9.26	165.26		8.97416	7.066		7.40647	37.63		9.29318	8.271
13.53	184.798		8	33.29		9.3	170.7		9.00644	7.628		7.43311	40.276		9.32661	8.501
13.58	186.798		8.03	36.27		9.33	174.67		9.03872	8.249		7.45975	43.385		9.36004	8.626
13.63	194.358		8.06	47.91		9.36	180.06		9.071	9.041		7.48639	46.351		9.39347	8.992
13.68	217.129		8.09	44.65		9.39	185.02		9.10328	9.943		7.51304	49.528		9.4269	9.378
13.73	259.909		8.11	43.44		9.43	190.19		9.13556	10.802		7.53968	52.54		9.46033	9.61
13.78	291.978		8.14	45.48		9.46	196.43		9.16784	11.855		7.56632	55.28		9.49376	9.768
13.82	344.418		8.17	48.48		9.49	201.39		9.20012	12.976		7.59296	58.005		9.52718	10.08
13.87	407.449		8.2	45.59		9.53	205.47		9.23241	14.005		7.6196	60.414		9.56062	10.218
13.92	514.578		8.23	49.36		9.56	213.12		9.26469	15.428		7.64625	62.445		9.59404	10.543
13.97	594.249		8.26	46.21		9.59	217.61		9.29697	16.861		7.67289	64.464		9.62747	10.785
14.02	702.659		8.29	48.94		9.63	225.29		9.32925	18.383		7.69953	65.891		9.6609	10.96
14.07	823.718		8.32	52.09		9.66	232.51		9.36153	20.342		7.72617	67.328		9.69433	11.099
14.12	1035.24		8.34	53.95		9.69	238.63		9.39381	22.205		7.75281	68.819		9.72776	11.253
14.16	1028.22		8.37	54.06		9.73	246.2		9.42609	24.438		7.77946	69.836		9.76119	11.462
14.21	1172.49		8.4	56.38		9.76	253.78		9.45837	26.906		7.8061	70.324		9.79462	11.719
14.26	1496.4		8.43	55.44		9.79	261.68		9.49066	29.569		7.83274	70.617		9.82804	11.769
14.31	1563.49		8.46	60.49		9.83	270.31		9.52294	33.156		7.85938	71.019		9.86147	12.111
14.36	1649.15		8.49	65.15		9.86	279.72		9.55522	36.482		7.88602	70.602		9.8949	12.28
14.41	1860.93		8.52	65.35		9.89	287.29		9.5875	40.6		7.91267	70.24		9.92833	12.294
14.46	1713.79		8.54	69.45		9.93	294.17		9.61978	45.206		7.93931	69.758		9.96176	12.555
14.5	1755.62		8.57	82.75		9.96	302.86		9.65206	49.827		7.96595	69.214		9.99519	12.706
14.55	1756.48		8.6	80.83		9.99	310.75		9.68434	55.689		7.99259	68.104		10.0286	12.876
14.6	1835.58		8.63	76.28		10.03	317.81		9.71662	61.533		8.01923	66.975		10.062	12.93
14.65	1614.2		8.66	78.55		10.06	327.84		9.7489	67.773		8.04588	66.042		10.0955	13.004
14.7	1677.83		8.69	81.81		10.09	335.96		9.78119	75.465		8.07252	65.621		10.1289	13.093
14.75	1489.27		8.72	78.75		10.13	341.18		9.81347	83.318		8.09916	63.894		10.1623	13.297
14.8	1293.65		8.75	78.29		10.16	345.18		9.84575	93.829		8.1258	63.07		10.1958	13.41
14.84	1123.49		8.77	84.5		10.19	349.83		9.87803	105.413		8.15244	62.301		10.2292	13.373
14.89	1021.52		8.8	84.91		10.23	353.84		9.91031	118.655		8.17909	61.433		10.2626	13.457
14.94	881.779		8.83	96.23		10.26	358.97		9.94259	136.304		8.20573	60.672		10.296	13.418
14.99	759.999		8.86	95.58		10.29	359.81		9.97487	153.996		8.23237	59.836		10.3295	13.64
15.04	675.818		8.89	94.59		10.33	363.91		10.0071	175.253		8.25901	59.436		10.3629	13.788
15.09	575.048		8.92	94.34		10.36	365.75		10.0394	197.772		8.28565	58.523		10.3963	13.671
15.13	510.608		8.95	100.33		10.39	370.06		10.0717	218.608		8.3123	57.739		10.4298	13.856
15.18	429.108		8.97	107.64		10.43	371.27		10.104	243.2		8.33894	57.438		10.4632	13.851
15.23	377.899		9	117.81		10.46	373.57		10.1363	265.16		8.36558	56.844		10.4966	13.762
15.28	324.108		9.03	116.19		10.49	377.1		10.1686	287.387		8.39222	56.292		10.53	13.913
15.33	290.459		9.06	115.5		10.53	379.97		10.2008	309.528		8.41886	55.944		10.5635	13.827
15.38	262.928		9.09	119.97		10.56	385.15		10.2331	327.653		8.44551	55.475		10.5969	13.968
15.43	225.888		9.12	117.1		10.59	389.99		10.2654	347.77		8.47215	55.253		10.6303	13.929
15.47	210.159		9.15	122.14		10.63	396.35		10.2977	365.819		8.49879	54.721		10.6638	13.929
15.52	203.958		9.18	137.73		10.66	406.02		10.33	382.984		8.52543	54.287		10.6972	13.986
15.57	200.749		9.2	133.3		10.69	412.28		10.3622	401.679		8.55207	54.135		10.7306	14.027
15.62	166.208		9.23	141.68		10.73	421.47		10.3945	416.846		8.57872	53.845		10.764	14.102
15.67	165.988		9.26	141.03		10.76	432.51		10.4268	433.991		8.60536	53.746		10.7975	14.125
15.72	154.069		9.29	148.17		10.79	445.36		10.4591	450.835		8.632	53.423		10.8309	14.073
15.77	153.238		9.32	145.67		10.83	458.07		10.4914	466.797		8.65864	53.343		10.8643	14.117
15.81	153.939		9.35	147.16		10.86	474.01		10.5236	485.1		8.68528	53.232		10.8978	14.243
15.86	143.578		9.38	148.62		10.89	488.35		10.5559	501.287		8.71193	53.166		10.9312	14.229
15.91	135.569		9.4	161.47		10.93	505.86		10.5882	518.718		8.73857	53.159		10.9646	14.249
15.96	140.858		9.43	161.56		10.96	519.3		10.6205	536.59		8.76521	52.936		10.998	14.229
16.01	140.798		9.46	175.36		10.99	539.62		10.6528	553.105		8.79185	53.128		11.0315	14.439
16.06	140.578		9.49	172.98		11.03	553.02		10.6851	572.013		8.81849	53.087		11.0649	14.511
16.1	134.469		9.52	184.8		11.06	576.78		10.7173	588.593		8.84514	53.025		11.0983	14.556
16.15	144.038		9.55	178.9		11.09	594.3		10.7496	605.063		8.87178	52.911		11.1318	14.649
16.2	150.879		9.58	179		11.13	610.41		10.7819	623.343		8.89842	52.75		11.1652	14.617
16.25	159.839		9.61	176.52		11.16	626.87		10.8142	637.835		8.92506	53.079		11.1986	14.64
16.3	167.559		9.63	181.99		11.19	643.3		10.8465	653.972		8.9517	53.079		11.232	14.824
16.35	175.149		9.66	191.39		11.23	674.82		10.8787	668.557		8.97834	53.08		11.2655	15.051
16.4	199.538		9.69	195.11		11.26	667.33		10.911	680.696		9.00499	53.381		11.2989	15.158
16.44	221.629		9.72	198.08		11.29	681.63		10.9433	693.504		9.03163	53.417		11.3323	15.194
16.49	227.488		9.75	212.41		11.33	695.05		10.9756	703.348		9.05827	53.645		11.3658	15.357
16.54	266.839		9.78	209.77		11.36	704.06		11.0079	712.171		9.08491	53.734		11.3992	15.486
16.59	301.748		9.81	212.32		11.39	706.18		11.0402	718.472		9.11155	53.622		11.4326	15.548
16.64	331.788		9.83	212.36		11.43	709.24		11.0724	721.986		9.1382	53.873		11.466	15.705
16.69	392.818		9.86	222.38		11.46	705.2		11.1047	724.01		9.16484	53.713		11.4995	15.764
16.74	435.709		9.89	225.8		11.49	707.75		11.137	723.201		9.19148	53.927		11.5329	15.92
16.78	503.019		9.92	232.09		11.53	705.55		11.1693	720.519		9.21812	53.974		11.5663	16.099
16.83	565.058		9.95	242.33		11.56	695.21		11.2016	713.888		9.24476	53.979		11.5998	16.307
16.88	642.479		9.98	242.76		11.59	686.31		11.2338	705.921		9.27141	53.996		11.6332	16.505
16.93	835.399		10.01	242.07		11.63	676.47		11.2661	694.548		9.29805	53.981		11.6666	16.706
16.98	969.609		10.04	250.96		11.66	657.62		11.2984	680.993		9.32469	53.924		11.7	16.966
17.03	925.609		10.06	256.57		11.69	645.62		11.3307	666.34		9.35133	53.99		11.7335	17.128
17.07	1019.02		10.09	266.79		11.73	594.11		11.363	647.176		9.37797	53.969		11.7669	17.428
17.12	1062.47		10.12	269.84		11.76	577.23		11.3952	629.586		9.40462	54.383		11.8003	17.606
17.17	1074.56		10.15	270.89		11.79	570.13		11.4275	608.478		9.43126	54.326		11.8338	17.924
17.22	1179.96		10.18	271.78		11.83	562.79		11.4598	586.233		9.4579	54.283		11.8672	18.185
17.27	1190.07		10.21	277.37		11.86	541.2		11.4921	565.039		9.48454	54.358		11.9006	18.335
17.32	1324.08		10.24	290.11		11.89	525.71		11.5244	539.155		9.51118	54.621		11.934	18.626
17.37	1126.5		10.27	293.02		11.93	505.26		11.5566	515.998		9.53783	54.573		11.9675	18.928
17.41	1064.55		10.29	288.02		11.96	489.5		11.5889	492.602		9.56447	54.674		12.0009	19.189
17.46	1029.54		10.32	286.8		11.99	467.31		11.6212	466.298		9.59111	54.714		12.0343	19.448
17.51	901.229		10.35	297.45		12.03	454.13		11.6535	443.981		9.61775	54.697		12.0678	19.486
17.56	949.918		10.38	300.24		12.06	435.57		11.6858	418.365		9.64439	54.688		12.1012	19.79
17.61	842.529		10.41	291.91		12.09	423.59		11.718	395.073		9.67104	54.859		12.1346	19.931
17.66	664.298		10.44	282.91		12.13	411.49		11.7503	373.435		9.69768	54.969		12.168	20.251
17.71	576.739		10.47	292.92		12.16	404.81		11.7826	349.625		9.72432	55.102		12.2015	20.387
17.75	501.728		10.49	296.18		12.19	400.6		11.8149	329.385		9.75096	55.169		12.2349	20.546
17.8	438.089		10.52	286.74		12.23	398.12		11.8472	308.252		9.7776	55.369		12.2683	20.635
17.85	372.849		10.55	268.77		12.26	399.12		11.8795	288.26		9.80425	55.428		12.3018	20.787
17.9	334.818		10.58	264.61		12.29	403.14		11.9117	270.684		9.83089	55.387		12.3352	20.846
17.95	287.219		10.61	263.54		12.33	409.72		11.944	251.797		9.85753	55.569		12.3686	20.894
18	247.809		10.64	263.08		12.36	417.58		11.9763	235.671		9.88417	55.643		12.4021	21.01
18.05	218.448		10.67	274.98		12.39	427.44		12.0086	219.699		9.91081	55.682		12.4355	21.06
18.09	197.198		10.7	289.9		12.43	440.29		12.0409	204.063		9.93746	55.627		12.4689	20.963
18.14	179.619		10.72	289.8		12.46	460.98		12.0732	191.389		9.9641	55.829		12.5023	20.952
18.19	160.349		10.75	288.99		12.49	486.13		12.1054	177.465		9.99074	55.911		12.5358	21.046
18.24	145.339		10.78	296.9		12.53	511.7		12.1377	165.406		10.0174	56.095		12.5692	21.12
18.29	139.379		10.81	302.93		12.56	542.73		12.17	154.347		10.044	56.207		12.6026	21.13
18.34	122.329		10.84	319.09		12.59	580.91		12.2023	143.027		10.0707	56.272		12.6361	21.176
18.38	125.579		10.87	358.93		12.63	622.33		12.2346	134.148		10.0973	56.455		12.6695	21.184
18.43	131.208		10.9	362.61		12.66	662.17		12.2668	124.718		10.124	56.494		12.7029	21.248
18.48	104.069		10.92	362.68		12.69	711.5		12.2991	116.14		10.1506	56.607		12.7363	21.303
18.53	98.4085		10.95	369.95		12.73	766.5		12.3314	108.719		10.1772	56.725		12.7698	21.386
18.58	106.519		10.98	381.94		12.76	827.54		12.3637	100.873		10.2039	56.863		12.8032	21.581
18.63	107.918		11.01	385.41		12.79	891.23		12.396	94.541		10.2305	56.693		12.8366	21.67
18.68	110.569		11.04	399.59		12.83	967.48		12.4282	88.44		10.2572	57.097		12.8701	21.812
18.72	110.629		11.07	423.2		12.86	1023.76		12.4605	82.429		10.2838	57.14		12.9035	22.055
18.77	119.319		11.1	442.18		12.89	1122.65		12.4928	77.378		10.3104	57.241		12.9369	22.397
18.82	93.5485		11.13	461.53		12.93	1204.3		12.5251	72.233		10.3371	57.435		12.9703	22.657
18.87	100.939		11.15	482.08		12.96	1296.51		12.5574	67.731		10.3637	57.469		13.0038	22.986
18.92	92.7985		11.18	510.33		12.99	1389.43		12.5896	63.811		10.3904	57.474		13.0372	23.337
18.97	81.4985		11.21	516.53		13.03	1493.43		12.6219	59.695		10.417	57.623		13.0706	23.86
19.02	83.8285		11.24	529.71		13.06	1599.87		12.6542	56.385		10.4436	57.679		13.1041	24.454
19.06	83.1885		11.27	537.23		13.09	1689.9		12.6865	52.978		10.4703	57.909		13.1375	24.947
19.11	86.3385		11.3	558.49		13.13	1917.68		12.7188	49.827		10.4969	57.855		13.1709	25.657
19.16	81.4285		11.33	578.87		13.16	1939.92		12.751	47.108		10.5236	58.317		13.2043	26.21
19.21	73.4985		11.35	594.23		13.19	2296.64		12.7833	44.314		10.5502	58.292		13.2378	26.911
19.26	71.4785		11.38	613.6		13.23	2130.15		12.8156	42.004		10.5769	58.673		13.2712	27.688
19.31	71.0585		11.41	613.67		13.26	2350.73		12.8479	39.696		10.6035	58.699		13.3046	28.579
19.35	56.4885		11.44	627.64		13.29	2371.91		12.8802	37.53		10.6302	58.925		13.3381	29.437
19.4	48.5085		11.47	635.58		13.33	2408.93		12.9125	35.741		10.6568	58.869		13.3715	30.472
19.45	41.1585		11.5	651.44		13.36	2801.16		12.9447	33.671		10.6834	59.323		13.4049	31.51
19.5	33.2485		11.53	641.73		13.39	2823.76		12.977	31.891		10.7101	59.253		13.4383	32.691
19.55	26.3685		11.56	636.59		13.43	2966.49		13.0093	30.31		10.7367	59.995		13.4718	33.75
19.6	26.6185		11.58	642.7		13.46	2821.11		13.0416	28.703		10.7634	60.221		13.5052	34.948
19.65	33.4885		11.61	639		13.49	2822.51		13.0739	27.443		10.79	60.196		13.5386	36.11
19.69	26.4285		11.64	628.28		13.53	2877.46		13.1061	25.988		10.8166	60.534		13.5721	37.392
19.74	16.0385		11.67	624.52		13.56	2746.91		13.1384	24.663		10.8433	60.876		13.6055	38.804
19.79	10.2085		11.7	630.19		13.59	2670.52		13.1707	23.596		10.8699	61.272		13.6389	40.08
19.84	2.1485		11.73	623.58		13.63	2609.11		13.203	22.47		10.8966	61.571		13.6723	41.528
19.89	-12.0015		11.76	603.72		13.66	2556.7		13.2353	21.339		10.9232	61.93		13.7058	42.902
19.94	-34.1815		11.78	587.11		13.69	2329.28		13.2675	20.349		10.9498	62.174		13.7392	44.44
19.99	-34.4215		11.81	572.5		13.73	2214.86		13.2998	19.292		10.9765	62.502		13.7726	45.838
20.03	-34.1315		11.84	543.95		13.76	2003.48		13.3321	18.521		11.0031	63.04		13.8061	47.192
20.08	-32.2615		11.87	531.94		13.79	1898.94		13.3644	17.664		11.0298	63.396		13.8395	48.865
20.13	-22.1715		11.9	505.6		13.83	1844.18		13.3967	16.978		11.0564	64.182		13.8729	50.426
20.18	-6.8515		11.93	472.36		13.86	1639.44		13.429	16.195		11.0831	64.713		13.9063	52.18
20.23	-2.7515		11.96	467.33		13.89	1438.02		13.4612	15.444		11.1097	65.299		13.9398	53.888
20.28	8.0685		11.99	431.88		13.93	1310.57		13.4935	14.795		11.1363	65.924		13.9732	55.943
20.33	22.4285		12.01	417.28		13.96	1155.38		13.5258	14.187		11.163	66.483		14.0066	58.045
20.37	31.0785		12.04	396.54		13.99	1086.42		13.5581	13.604		11.1896	66.858		14.0401	60.205
20.42	44.6185		12.07	382.96		14.03	982.51		13.5904	13.05		11.2163	67.53		14.0735	62.49
20.47	55.6385		12.1	368.2		14.06	887.39		13.6226	12.58		11.2429	68.009		14.1069	65.027
20.52	71.0385		12.13	355.71		14.09	794.27		13.6549	12.125		11.2696	68.761		14.1403	68.059
20.57	74.5885		12.16	325.24		14.13	715.9		13.6872	11.651		11.2962	69.393		14.1738	71.421
20.62	83.9485		12.19	310.48		14.16	639.53		13.7195	11.196		11.3228	70.063		14.2072	75.372
20.66	83.7785		12.21	301.35		14.19	575.87		13.7518	10.841		11.3495	70.821		14.2406	79.798
20.71	80.5385		12.24	283.17		14.23	516.72		13.7841	10.506		11.3761	71.405		14.2741	85.148
20.76	78.0485		12.27	272.29		14.26	466.89		13.8163	10.216		11.4028	71.982		14.3075	91.157
20.81	70.1585		12.3	269.21		14.29	424.42		13.8486	9.857		11.4294	73.035		14.3409	97.986
20.86	40.1885		12.33	258.73		14.33	375.73		13.8809	9.521		11.456	73.962		14.3743	105.688
20.91	10.4285		12.36	257.31		14.36	341.73		13.9132	9.288		11.4827	74.723		14.4078	114.73
20.96	-16.9315		12.39	257.12		14.39	310.5		13.9454	9.082		11.5093	75.719		14.4412	125.788
21	-41.8415		12.42	259.95		14.43	282.92		13.9777	8.798		11.536	76.784		14.4746	138.494
21.05	-57.0315		12.44	257.57		14.46	257.64		14.01	8.656		11.5626	77.856		14.5081	153.037
21.1	-62.5215		12.47	249.94		14.49	235.56		14.0423	8.323		11.5893	78.936		14.5415	169.238
21.15	-58.6615		12.5	285.58		14.53	216.23		14.0746	8.269		11.6159	79.887		14.5749	187.328
21.2	-61.9515		12.53	301.23		14.56	198.92		14.1069	8.051		11.6425	81.013		14.6083	207.001
21.25	-59.7015		12.56	322.63		14.59	181.74		14.1391	7.871		11.6692	82.289		14.6418	227.202
21.3	-57.2615		12.59	334.65		14.63	171.64		14.1714	7.582		11.6958	83.672		14.6752	248.705
21.34	-50.3215		12.62	367.03		14.66	160.23		14.2037	7.525		11.7225	84.818		14.7086	271.3
21.39	-40.3715		12.64	382.51		14.69	149.37		14.236	7.46		11.7491	86.193		14.7421	296.532
21.44	-3.9015		12.67	417.5		14.73	140.82		14.2683	7.428		11.7758	87.506		14.7755	321.833
21.49	27.6685		12.7	454.76		14.76	132.04		14.3005	7.339		11.8024	88.699		14.8089	347.905
21.54	42.3185		12.73	483.68		14.79	126.85		14.3328	7.166		11.829	89.986		14.8423	373.273
21.59	43.3485		12.76	533.22		14.83	120.56		14.3651	7.117		11.8557	91.579		14.8758	398.278
21.63	42.5085		12.79	574.08		14.86	115.29		14.3974	6.954		11.8823	93.003		14.9092	421.707
21.68	19.7085		12.82	629.27		14.89	109.57		14.4297	6.815		11.909	94.675		14.9426	442.963
21.73	27.0885		12.85	672.26		14.93	104.44		14.4619	6.674		11.9356	96.053		14.9761	462.181
21.78	29.4785		12.87	733.52		14.96	102.12		14.4942	6.584		11.9622	97.732		15.0095	480.135
21.83	30.8485		12.9	790.69		14.99	98.69		14.5265	6.451		11.9889	99.023		15.0429	495.777
21.88	38.4685		12.93	851.46		15.03	95.78		14.5588	6.363		12.0155	100.64		15.0763	509.13
21.93	44.8585		12.96	938.68		15.06	93.62		14.5911	6.194		12.0422	102.228		15.1098	519.462
21.97	47.5785		12.99	1087.37		15.09	91.76		14.6234	6.023		12.0688	104.121		15.1432	526.698
22.02	61.1585		13.02	1123.02		15.13	89.48		14.6556	6.066		12.0955	106.042		15.1766	530.788
22.07	69.2185		13.05	1155.45		15.16	88.12		14.6879	5.955		12.1221	107.495		15.2101	532.412
22.12	79.2985		13.07	1329.49		15.19	86.84		14.7202	5.855		12.1487	109.414		15.2435	530.947
22.17	91.5585		13.1	1398.94		15.23	84.19		14.7525	5.76		12.1754	111.036		15.2769	527.251
22.22	92.9885		13.13	1514.46		15.26	84.9		14.7848	5.707		12.202	112.973		15.3103	521.056
22.27	91.7785		13.16	1598.55		15.29	82.01		14.817	5.593		12.2287	114.822		15.3438	512.085
22.31	93.5485		13.19	1610.14		15.33	83.17		14.8493	5.577		12.2553	117.047		15.3772	500.925
22.36	84.2985		13.22	1345.8		15.36	80.57		14.8816	5.61		12.282	118.727		15.4106	487.764
22.41	78.4685		13.25	1511.96		15.39	82.02		14.9139	5.396		12.3086	120.968		15.4441	473.232
22.46	74.1085		13.28	1671.26		15.43	79.92		14.9462	5.396		12.3352	123.379		15.4775	456.929
22.51	62.7385		13.3	1744.87		15.46	79.51		14.9785	5.339		12.3619	126.215		15.5109	440.561
22.56	49.5185		13.33	1791.09		15.49	78.64		15.0107	5.345		12.3885	128.603		15.5444	423.981
22.6	34.4185		13.36	2034.43		15.53	78.96		15.043	5.176		12.4152	131.503		15.5778	406.367
22.65	39.6685		13.39	2084.19		15.56	79.83		15.0753	5.266		12.4418	134.687		15.6112	387.316
22.7	25.8785		13.42	2026.09		15.59	78.03		15.1076	5.204		12.4684	138.316		15.6446	367.891
22.75	23.2985		13.45	2035.53		15.62	76.68		15.1399	5.108		12.4951	142.009		15.6781	348.458
22.8	21.5985		13.48	2218.43		15.66	77.84		15.1721	5.068		12.5217	146.782		15.7115	329.139
22.85	24.6885		13.51	2052.4		15.69	73.61		15.2044	4.928		12.5484	152.144		15.7449	310.221
22.9	27.3085		13.53	2152.04		15.72	76.52		15.2367	4.959		12.575	157.436		15.7784	291.933
22.94	29.4685		13.56	2116.83		15.76	75.72		15.269	4.985		12.6016	164.058		15.8118	274.988
22.99	32.0285		13.59	2184.63		15.79	76		15.3013	4.981		12.6283	171.539		15.8452	258.728
23.04	43.1085		13.62	1902.91		15.82	75.84		15.3335	5.034		12.6549	180.054		15.8786	242.676
23.09	55.1985		13.65	1766.39		15.86	74.84		15.3658	5.011		12.6816	189.911		15.9121	226.867
23.14	47.9985		13.68	1789.15		15.89	74.81		15.3981	4.876		12.7082	201.026		15.9455	211.789
23.19	61.6885		13.71	1923.32		15.92	74.55		15.4304	4.835		12.7349	213.312		15.9789	197.577
23.24	66.6585		13.73	1721.6		15.96	74.18		15.4627	4.916		12.7615	227.483		16.0124	183.751
23.28	70.2185		13.76	1442.04		15.99	73.49		15.4949	4.749		12.7881	242.363		16.0458	171.035
23.33	72.9785		13.79	1348.75		16.02	73		15.5272	4.702		12.8148	258.472		16.0792	159.658
23.38	79.7385		13.82	1289.42		16.06	73.44		15.5595	4.663		12.8414	276.827		16.1126	149.258
23.43	74.7685		13.85	1209.17		16.09	72.06		15.5918	4.793		12.8681	296.179		16.1461	139.368
23.48	72.0585		13.88	1114.95		16.12	72.81		15.6241	4.461		12.8947	316.809		16.1795	130.029
23.53	70.3785		13.91	1035.73		16.16	71.82		15.6563	4.504		12.9214	338.723		16.2129	120.954
23.58	66.2085		13.94	956.55		16.19	72.26		15.6886	4.442		12.948	361.267		16.2464	112.773
23.62	61.0985		13.96	856.42		16.22	70.39		15.7209	4.436		12.9746	384.838		16.2798	105.075
23.67	52.8485		13.99	800.3		16.26	70.09		15.7532	4.397		13.0013	409.146		16.3132	98.085
23.72	53.9685		14.02	745.11		16.29	69.58		15.7855	4.399		13.0279	432.751		16.3467	91.542
23.77	48.5385		14.05	680.64		16.32	69.61		15.8178	4.323		13.0546	457.064		16.3801	85.628
23.82	42.3285		14.08	626.28		16.36	69.02		15.85	4.301		13.0812	482.661		16.4135	80.539
23.87	35.8185		14.11	571.49		16.39	68.59		15.8823	4.387		13.1078	506.789		16.4469	75.623
23.91	32.6085		14.14	508.7		16.42	67.93		15.9146	4.267		13.1345	530.467		16.4804	71.004
23.96	31.2285		14.16	469.36		16.46	68.68		15.9469	4.291		13.1611	553.031		16.5138	66.709
24.01	25.7485		14.19	431.34		16.49	69.69		15.9792	4.177		13.1878	574.686		16.5472	62.684
24.06	23.8585		14.22	419.35		16.52	67.55		16.0114	4.193		13.2144	594.791		16.5806	58.934
24.11	20.5485		14.25	374.8		16.56	66.29		16.0437	4.072		13.2411	613.794		16.6141	55.664
24.16	12.1985		14.28	332.85		16.59	65.61		16.076	4.188		13.2677	631.448		16.6475	52.355
24.21	19.3085		14.31	301.59		16.62	64.39		16.1083	4.163		13.2943	646.926		16.6809	49.55
24.25	9.5385		14.34	280.63		16.66	63.62		16.1406	4.212		13.321	661.034		16.7144	47.001
24.3	7.3785		14.37	260.29		16.69	61.53		16.1729	4.091		13.3476	672.831		16.7478	44.582
24.35	3.2885		14.39	232.78		16.72	59.19		16.2051	4.034		13.3743	683.274		16.7812	42.466
24.4	5.5485		14.42	212.26		16.76	57.88		16.2374	4.017		13.4009	692.688		16.8147	40.308
24.45	2.9285		14.45	193.73		16.79	56.78		16.2697	4.094		13.4276	698.138		16.8481	38.309
24.5	7.3985		14.48	183.27		16.82	55.75		16.302	4.236		13.4542	703.688		16.8815	36.556
24.55	1.2485		14.51	176.17		16.86	56.24		16.3343	4.114		13.4808	708.211		16.9149	34.761
24.59	-1.9315		14.54	170.07		16.89	55.37		16.3665	4.066		13.5075	710.262		16.9484	33.173
24.64	4.5585		14.57	162.34		16.92	56.15		16.3988	4.065		13.5341	709.241		16.9818	31.918
24.69	-2.1715		14.59	149.31		16.96	53.75		16.4311	4.07		13.5608	709.353		17.0152	30.578
24.74	-6.7615		14.62	149.1		16.99	54.74		16.4634	4.086		13.5874	706.009		17.0486	29.357
24.79	-6.3815		14.65	142.96		17.02	52.89		16.4957	4.099		13.6141	701.986		17.0821	28.174
24.84	-6.9715		14.68	133.49		17.06	53.06		16.5279	4.06		13.6407	695.53		17.1155	27.116
24.88	-0.3115		14.71	126.69		17.09	50.74		16.5602	3.957		13.6673	689.726		17.1489	26.191
24.93	-4.9315		14.74	119.42		17.12	51.55		16.5925	3.931		13.694	682.064		17.1824	25.317
24.98	-9.2315		14.77	115.93		17.16	51.48		16.6248	3.744		13.7206	672.991		17.2158	24.509
25.03	-3.9915		14.8	110.92		17.19	51.12		16.6571	3.745		13.7473	663.911		17.2492	23.843
25.08	-0.6215		14.82	110.57		17.22	50.89		16.6894	3.799		13.7739	653.168		17.2827	23.239
25.13	-3.1315		14.85	99.19		17.26	50.54		16.7216	3.744		13.8005	641.562		17.3161	22.59
25.18	-4.6815		14.88	98.92		17.29	50.73		16.7539	3.714		13.8272	629.473		17.3495	22.038
25.22	-5.6815		14.91	94.09		17.32	49.98		16.7862	3.607		13.8538	616.618		17.3829	21.578
25.27	0.5885		14.94	94.27		17.36	50.65		16.8185	3.638		13.8805	604.084		17.4164	21.113
25.32	6.1285		14.97	91.73		17.39	50.49		16.8508	3.655		13.9071	590.798		17.4498	20.759
25.37	9.4585		15	89.45		17.42	50.06		16.883	3.596		13.9337	577.232		17.4832	20.385
25.42	7.3985		15.02	87.68		17.46	50.79		16.9153	3.601		13.9604	562.819		17.5166	20.037
25.47	8.0885		15.05	85.37		17.49	50.26		16.9476	3.667		13.987	548.198		17.5501	19.827
25.52	16.4985		15.08	76.08		17.52	49.95		16.9799	3.541		14.0137	532.648		17.5835	19.609
25.56	23.6985		15.11	76.39		17.56	50.97		17.0122	3.5		14.0403	517.855		17.6169	19.467
25.61	28.9685		15.14	74.46		17.59	50.25		17.0444	3.489		14.067	504.343		17.6504	19.033
25.66	22.9885		15.17	73.95		17.62	50.51		17.0767	3.513		14.0936	489.514		17.6838	19.101
25.71	23.5685		15.2	69		17.66	48.97		17.109	3.469		14.1202	473.972		17.7172	19.065
25.76	32.0585		15.23	64.17		17.69	49.23		17.1413	3.501		14.1469	460.217		17.7507	19.001
25.81	32.1585		15.25	64.64		17.72	49.17		17.1736	3.477		14.1735	445.838		17.7841	18.897
25.86	34.9485		15.28	64.25		17.76	49.5		17.2059	3.307		14.2002	431.533		17.8175	18.917
25.9	39.5085		15.31	65.87		17.79	49.02		17.2381	3.361		14.2268	417.548		17.8509	18.876
25.95	43.0485		15.34	62.32		17.82	49.38		17.2704	3.357		14.2535	403.581		17.8844	18.916
26	28.1085		15.37	70.31		17.86	50.06		17.3027	3.282		14.2801	390.195		17.9178	18.845
26.05	30.8785		15.4	68.14		17.89	47.06		17.335	3.382		14.3067	377.512		17.9512	18.896
26.1	29.0285		15.43	69.42		17.92	48.13		17.3672	3.411		14.3334	364.496		17.9846	18.965
26.15	29.6185		15.45	71.07		17.96	48.42		17.3995	3.24		14.36	351.554		18.0181	18.913
26.19	24.1085		15.48	69.75		17.99	48.53		17.4318	3.281		14.3867	339.507		18.0515	19.18
26.24	26.7285		15.51	70.15		18.02	47.45		17.4641	3.303		14.4133	327.549		18.0849	19.378
26.29	19.5785		15.54	69.21		18.06	48.17		17.4964	3.233		14.4399	315.869		18.1184	19.478
26.34	17.6585		15.57	68.84		18.09	47.96		17.5287	3.288		14.4666	304.998		18.1518	19.566
26.39	16.3185		15.6	68.37		18.12	47.86		17.5609	3.209		14.4932	293.902		18.1852	19.704
26.44	18.0385		15.63	64.11		18.16	47.58		17.5932	3.173		14.5199	283.02		18.2187	19.919
26.49	13.5885		15.66	63.6		18.19	46.72		17.6255	3.162		14.5465	273.252		18.2521	20.122
26.53	17.1685		15.68	63.6		18.22	47.96		17.6578	3.054		14.5732	263.444		18.2855	20.361
26.58	14.0885		15.71	64.24		18.26	48.21		17.6901	3.096		14.5998	253.688		18.3189	20.633
26.63	17.1985		15.74	60.34		18.29	47.51		17.7223	3.112		14.6264	244.833		18.3524	20.862
26.68	19.2885		15.77	61.61		18.32	47.55		17.7546	2.934		14.6531	236.462		18.3858	21.104
26.73	13.9985		15.8	63.9		18.36	47.68		17.7869	3.048		14.6797	227.781		18.4192	21.497
26.78	14.7485		15.83	62.34		18.39	47.12		17.8192	3.016		14.7064	219.852		18.4526	21.806
26.83	14.3985		15.86	55		18.42	47.17		17.8515	2.975		14.733	212.357		18.4861	22.166
26.87	7.2385		15.88	52.04		18.46	47.34		17.8837	2.955		14.7597	204.856		18.5195	22.57
26.92	5.8185		15.91	52.17		18.49	47.01		17.916	2.995		14.7863	198.29		18.5529	23.068
26.97	8.3785		15.94	49.98		18.52	46.75		17.9483	2.897		14.8129	191.756		18.5864	23.705
27.02	7.3385		15.97	48.68		18.56	46.55		17.9806	2.944		14.8396	185.063		18.6198	24.646
27.07	12.6685		16	53.42		18.59	46.35		18.0129	2.885		14.8662	179.371		18.6532	25.449
27.12	-3.8015		16.03	55.7		18.62	44.89		18.0452	2.905		14.8929	173.73		18.6867	26.371
27.16	-1.6715		16.06	49.47		18.66	45.82		18.0774	2.861		14.9195	167.996		18.7201	27.328
27.21	-2.6515		16.09	52.67		18.69	44.81		18.1097	2.895		14.9461	163.419		18.7535	28.188
27.26	-4.1315		16.11	57.45		18.72	43.85		18.142	2.954		14.9728	158.376		18.7869	29.173
27.31	-5.7015		16.14	55.72		18.76	44.05		18.1743	2.902		14.9994	153.865		18.8204	30.146
27.36	-8.8615		16.17	49.56		18.79	42.85		18.2066	2.778		15.0261	149.497		18.8538	30.978
27.41	-13.6615		16.2	54.27		18.82	42.43		18.2388	2.817		15.0527	145.407		18.8872	31.909
27.46	-20.0115		16.23	56.41		18.86	42.38		18.2711	2.786		15.0794	141.528		18.9207	32.695
27.5	-14.4215		16.26	51.88		18.89	41.53		18.3034	2.862		15.106	138.485		18.9541	33.592
27.55	-14.6315		16.29	43.25		18.92	42.15		18.3357	2.92		15.1326	135.249		18.9875	34.323
27.6	-16.8815		16.32	42.27		18.96	40.45		18.368	2.956		15.1593	132.268		19.0209	34.848
27.65	-17.0315		16.34	41.04		18.99	40.4		18.4002	2.949		15.1859	129.373		19.0544	35.17
27.7	-18.3115		16.37	49.87		19.02	38.35		18.4325	2.884		15.2126	126.91		19.0878	35.976
27.75	-16.8315		16.4	33.29		19.06	40.52		18.4648	2.955		15.2392	124.66		19.1212	37.615
27.8	-17.3015		16.43	18.32		19.09	41.01		18.4971	2.952		15.2659	122.548		19.1547	39.6
27.84	-14.1915		16.46	10.39		19.12	40.41		18.5294	2.959		15.2925	120.366		19.1881	41.79
27.89	-13.6915		16.49	10.21		19.16	41.03		18.5617	2.927		15.3191	118.692		19.2215	43.718
27.94	-23.2315		16.52	41.8		19.19	41.7		18.5939	2.916		15.3458	117.147		19.2549	45.445
27.99	-22.6315		16.54	44.3		19.22	42.52		18.6262	2.822		15.3724	115.823		19.2884	46.713
28.04	-21.6615		16.57	43.33		19.26	43.42		18.6585	2.821		15.3991	114.615		19.3218	47.359
28.09	-22.4515		16.6	40.81		19.29	42.94		18.6908	2.765		15.4257	113.762		19.3552	47.445
28.13	-25.1815		16.63	33.99		19.32	44.06		18.7231	2.684		15.4523	112.974		19.3887	47.144
28.18	-24.0215		16.66	35.96		19.36	45.01		18.7553	2.78		15.479	112.083		19.4221	46.935
28.23	-26.9615		16.69	32.25		19.39	46.1		18.7876	2.842		15.5056	111.934		19.4555	46.813
28.28	-22.9415		16.72	26.99		19.42	46.51		18.8199	2.743		15.5323	111.704		19.4889	46.873
28.33	-27.9815		16.75	29.75		19.46	47.14		18.8522	2.819		15.5589	112.128		19.5224	46.941
28.38	-26.7715		16.77	30		19.49	47.06		18.8845	2.853		15.5855	112.034		19.5558	46.698
28.43	-27.2915		16.8	31.78		19.52	47.81		18.9168	2.91		15.6122	112.393		19.5892	45.883
28.47	-27.9415		16.83	38.69		19.56	47.85		18.949	2.995		15.6388	113.294		19.6227	44.539
28.52	-26.7915		16.86	38.98		19.59	47.1		18.9813	3.15		15.6655	113.632		19.6561	42.492
28.57	-33.2115		16.89	40.75		19.62	41.96		19.0136	3.085		15.6921	114.241		19.6895	40.296
28.62	-26.5215		16.92	38.12		19.66	43.37		19.0459	3.194		15.7188	115.581		19.723	38.865
28.67	-27.8515		16.95	35.51		19.69	47.7		19.0782	3.277		15.7454	116.478		19.7564	38.226
28.72	-25.9015		16.97	38.39		19.72	49.72		19.1104	3.383		15.7721	117.504		19.7898	38.035
28.77	-27.7215		17	37.1		19.76	51.41		19.1427	3.469		15.7987	118.851		19.8232	37.968
28.81	-23.6715		17.03	43.2		19.79	50.72		19.175	3.588		15.8253	120.093		19.8567	37.748
28.86	-34.3015		17.06	40.59		19.82	51.8		19.2073	3.624		15.852	121.522		19.8901	37.337
28.91	-26.1815		17.09	36.53		19.86	52.1		19.2396	3.63		15.8786	122.702		19.9235	36.729
28.96	-26.5615		17.12	43.59		19.89	51.12		19.2718	3.761		15.9053	124.311		19.9569	35.862
29.01	-28.8415		17.15	41.92		19.92	52.99		19.3041	3.877		15.9319	125.471		19.9904	34.772
29.06	-24.3715		17.18	40.16		19.96	53.22		19.3364	3.973		15.9585	127.106		20.0238	33.671
29.11	-30.0115		17.2	40.15		19.99	53.28		19.3687	4.002		15.9852	128.49		20.0572	32.441
29.15	-26.4115		17.23	40.88		20.02	55.24		19.401	3.989		16.0118	129.67		20.0907	31.239
29.2	-26.3115		17.26	35.55		20.06	55.17		19.4333	3.994		16.0385	130.982		20.1241	30.033
29.25	-29.5915		17.29	38.45		20.09	56.26		19.4655	4.007		16.0651	131.935		20.1575	28.931
29.3	-34.5515		17.32	36.7		20.12	54.54		19.4978	4.025		16.0918	132.814		20.191	27.936
29.35	-28.7615		17.35	36.38		20.16	54.58		19.5301	4.012		16.1184	134.39		20.2244	27.176
29.4	-28.9415		17.38	36.81		20.19	54.45		19.5624	4.116		16.145	134.875		20.2578	26.374
29.44	-29.3715		17.4	43.81		20.22	54.55		19.5947	4.036		16.1717	135.678		20.2912	25.963
29.49	-26.6715		17.43	39.98		20.26	53.98		19.6269	3.991		16.1983	136.2		20.3247	25.801
29.54	-25.6015		17.46	42.67		20.29	53.73		19.6592	3.846		16.225	136.564		20.3581	25.48
29.59	-27.2615		17.49	51.94		20.32	53.13		19.6915	3.824		16.2516	137.189		20.3915	25.197
29.64	-29.2415		17.52	54.05		20.36	51.58		19.7238	3.704		16.2782	136.918		20.4249	24.66
29.69	-28.4615		17.55	51.63		20.39	48.77		19.7561	3.73		16.3049	137.082		20.4584	23.924
29.74	-28.4915		17.58	48.58		20.42	50.39		19.7883	3.624		16.3315	137.29		20.4918	22.931
29.78	-29.9115		17.61	50.33		20.46	49.85		19.8206	3.419		16.3582	137.324		20.5252	21.739
29.83	-27.3115		17.63	50.32		20.49	49.21		19.8529	3.345		16.3848	137.134		20.5587	20.747
29.88	-30.1415		17.66	48.98		20.52	48.38		19.8852	3.15		16.4115	136.737		20.5921	19.714
29.93	-25.6715		17.69	50.46		20.56	48.05		19.9175	3		16.4381	136.858		20.6255	18.941
29.98	-30.4515		17.72	50.6		20.59	48.15		19.9498	2.837		16.4647	136.341		20.659	18.226
30.03	-29.6115		17.75	51.94		20.62	47.77		19.982	2.788		16.4914	135.679		20.6924	17.596
30.08	-28.6015		17.78	51.17		20.66	49.09		20.0143	2.511		16.518	135.404		20.7258	16.987
30.12	-30.4815		17.81	52.48		20.69	47.87		20.0466	2.412		16.5447	135.097		20.7592	16.358
30.17	-32.2015		17.83	51.03		20.72	47.17		20.0789	2.246		16.5713	134.668		20.7927	15.613
30.22	-29.7215		17.86	49.31		20.76	47.17		20.1111	2.112		16.598	134.601		20.8261	14.85
30.27	-21.5015		17.89	48.56		20.79	47.34		20.1434	1.933		16.6246	134.388		20.8595	13.906
30.32	-35.9215		17.92	49.63		20.82	47.49		20.1757	1.863		16.6512	134.178		20.8929	12.975
30.37	-30.7815		17.95	48.45		20.86	47.33		20.208	1.758		16.6779	134.377		20.9264	12.022
30.41	-28.9715		17.98	46.88		20.89	47.51		20.2403	1.555		16.7045	135.106		20.9598	11.194
30.46	-30.0515		18.01	50.41		20.92	46.18		20.2726	1.484		16.7312	135.55		20.9932	10.518
30.51	-24.7115		18.04	47.25		20.96	47.03		20.3048	1.163		16.7578	136.676		21.0267	9.92
30.56	-21.6215		18.06	46.04		20.99	46.38		20.3371	1.038		16.7844	137.433		21.0601	9.354
30.61	-29.3415		18.09	49.19		21.02	47.31		20.3694	0.851		16.8111	138.801		21.0935	9.05
30.66	-25.9015		18.12	48.26		21.06	47.34		20.4017	0.855		16.8377	140.313		21.127	8.892
30.71	-26.4415		18.15	49.85		21.09	46.82		20.434	0.774		16.8644	141.495		21.1604	8.683
30.75	-25.9515		18.18	46.73		21.12	47.55		20.4662	0.564		16.891	142.57		21.1938	8.529
30.8	-24.4615		18.21	46.22		21.16	46.56		20.4985	0.474		16.9176	143.884		21.2272	8.557
30.85	-24.7615		18.24	48.71		21.19	47.85		20.5308	0.247		16.9443	145.66		21.2607	8.465
30.9	-29.3815		18.26	49.84		21.22	44.6		20.5631	0.178		16.9709	146.778		21.2941	8.443
30.95	-30.3415		18.29	52.6		21.26	46.09		20.5954	0		16.9976	148.105		21.3275	8.336
31	-28.4715		18.32	56.41		21.29	46.24		20.6276	0.095		17.0242	149.289		21.3609	8.255
31.05	-28.5215		18.35	53.97		21.32	46.16		20.6599	0.024		17.0509	150.437		21.3944	8.406
31.09	-27.1615		18.38	52.44		21.36	46.16		20.6922	0.136		17.0775	151.588		21.4278	8.474
31.14	-27.5815		18.41	52.95		21.39	47.57		20.7245	0.225		17.1042	152.744		21.4612	8.464
31.19	-21.7715		18.44	53.17		21.42	46.51		20.7568	0.384		17.1308	153.541		21.4947	8.375
31.24	-29.1315		18.47	57.03		21.46	46.81		20.789	0.521		17.1574	154.77		21.5281	8.383
31.29	-28.7015		18.49	51.54		21.49	46.01		20.8213	0.753		17.1841	155.192		21.5615	8.401
31.34	-24.7515		18.52	55.46		21.52	44.67		20.8536	0.937		17.2107	155.798		21.595	8.442
31.38	-22.5815		18.55	55.7		21.56	42.39		20.8859	1.167		17.2374	156.038		21.6284	8.42
31.43	-31.6915		18.58	55.04		21.59	45.9		20.9182	1.425		17.264	155.97		21.6618	8.371
31.48	-28.6815		18.61	55.02		21.62	46.16		20.9505	1.565		17.2906	155.789		21.6952	8.306
31.53	-25.0015		18.64	53.84		21.66	45.75		20.9827	1.669		17.3173	155.258		21.7287	8.367
31.58	-25.4115		18.67	55.51		21.69	45.89		21.015	1.748		17.3439	154.264		21.7621	8.343
31.63	-26.6915		18.69	54.51		21.72	46.26		21.0473	1.855		17.3706	153.803		21.7955	8.295
31.68	-25.9915		18.72	55.19		21.76	45.98		21.0796	1.902		17.3972	152.617		21.8289	8.4
31.72	-26.6415		18.75	60.32		21.79	46.14		21.1119	1.961		17.4239	151.355		21.8624	8.41
31.77	-30.8415		18.78	61.25		21.82	46.16		21.1441	1.939		17.4505	149.787		21.8958	8.365
31.82	-25.6615		18.81	55.54		21.85	45.55		21.1764	1.882		17.4771	148.115		21.9292	8.463
31.87	-24.1015		18.84	57.01		21.89	45.89		21.2087	1.922		17.5038	146.627		21.9627	8.415
31.92	-24.1315		18.87	56.08		21.92	46.78		21.241	2.02		17.5304	144.895		21.9961	8.357
31.97	-23.6115		18.9	55.37		21.95	47.29		21.2733	1.936		17.5571	143.131		22.0295	8.375
32.02	-26.1615		18.92	58.35		21.99	47.57		21.3056	1.89		17.5837	141.381		22.063	8.416
32.06	-27.0115		18.95	53.63		22.02	48.38		21.3378	1.755		17.6103	139.17		22.0964	8.378
32.11	-25.1015		18.98	56.72		22.05	49.37		21.3701	1.677		17.637	137.158		22.1298	8.429
32.16	-25.7915		19.01	51.14		22.09	48.33		21.4024	1.701		17.6636	134.969		22.1632	8.388
32.21	-26.3915		19.04	53.81		22.12	50.13		21.4347	1.789		17.6903	132.972		22.1967	8.433
			19.07	56.7		22.15	51.6		21.467	1.759		17.7169	130.656		22.2301	8.446
			19.1	55.51		22.19	52.67		21.4992	1.639		17.7435	128.152		22.2635	8.398
			19.13	55.42		22.22	54.17		21.5315	1.592		17.7702	125.961		22.297	8.647
			19.15	55.16		22.25	54.06		21.5638	1.601		17.7968	123.842		22.3304	8.603
			19.18	58.58		22.29	56.83		21.5961	1.557		17.8235	121.425		22.3638	8.641
			19.21	58.95		22.32	55.68		21.6284	1.518		17.8501	119.21		22.3972	8.614
			19.24	56.21		22.35	56.19		21.6606	1.479		17.8768	117.147		22.4307	8.586
			19.27	55.85		22.39	56.66		21.6929	1.446		17.9034	114.868		22.4641	8.643
			19.3	55.92		22.42	57.4		21.7252	1.43		17.9301	112.586		22.4975	8.611
			19.33	60.07		22.45	56.5		21.7575	1.338		17.9567	110.569		22.531	8.53
			19.35	58.6		22.49	56.99		21.7898	1.365		17.9833	108.633		22.5644	8.568
			19.38	58.8		22.52	57.68		21.8221	1.364		18.01	106.528		22.5978	8.473
			19.41	59.68		22.55	57.46		21.8543	1.372		18.0366	104.165		22.6312	8.535
			19.44	59.79		22.59	57.33		21.8866	1.32		18.0633	102.224		22.6647	8.516
			19.47	56.95		22.62	57.26		21.9189	1.387		18.0899	100.096		22.6981	8.45
			19.5	53.68		22.65	55.86		21.9512	1.34		18.1165	98.175		22.7315	8.607
			19.53	54.62		22.69	56.65		21.9835	1.354		18.1432	96.384		22.765	8.589
			19.56	55.88		22.72	56.74		22.0157	1.326		18.1698	94.366		22.7984	8.632
			19.58	53.72		22.75	56.49		22.048	1.34		18.1965	92.476		22.8318	8.644
			19.61	52.7		22.79	56.63		22.0803	1.308		18.2231	90.446		22.8652	8.677
			19.64	53.2		22.82	56.36		22.1126	1.312		18.2497	88.638		22.8987	8.67
			19.67	53.01		22.85	55.24		22.1449	1.243		18.2764	86.741		22.9321	8.71
			19.7	49.19		22.89	55.93		22.1771	1.36		18.303	85.044		22.9655	8.758
			19.73	52.78		22.92	55.99		22.2094	1.24		18.3297	83.126		22.999	8.719
			19.76	51.06		22.95	55.49		22.2417	1.424		18.3563	81.628		23.0324	8.664
			19.78	50.95		22.99	55.85		22.274	1.327		18.383	80.012		23.0658	8.751
			19.81	53.07		23.02	55.64		22.3063	1.295		18.4096	78.389		23.0993	8.729
			19.84	55.48		23.05	55.16		22.3386	1.312		18.4362	76.714		23.1327	8.7
			19.87	55.89		23.09	57.11		22.3708	1.344		18.4629	75.227		23.1661	8.702
			19.9	56.48		23.12	55.17		22.4031	1.326		18.4895	73.582		23.1995	8.702
			19.93	56.29		23.15	55.11		22.4354	1.44		18.5162	72.198		23.233	8.682
			19.96	55.13		23.19	55.14		22.4677	1.487		18.5428	70.597		23.2664	8.765
			19.99	56.74		23.22	54.91		22.4999	1.502		18.5694	69.537		23.2998	8.661
			20.01	57.04		23.25	54.3		22.5322	1.452		18.5961	68.123		23.3332	8.681
			20.04	58.67		23.29	54.53		22.5645	1.551		18.6227	66.577		23.3667	8.532
			20.07	57.65		23.32	55.74		22.5968	1.457		18.6494	65.572		23.4001	8.573
			20.1	60.39		23.35	54.92		22.6291	1.561		18.676	64.611		23.4335	8.563
			20.13	61.07		23.39	56.63		22.6614	1.434		18.7027	63.463		23.467	8.431
			20.16	60.83		23.42	54.72		22.6936	1.453		18.7293	62.272		23.5004	8.448
			20.19	58.17		23.45	53.9		22.7259	1.369		18.7559	61.166		23.5338	8.307
			20.21	60.45		23.49	53.89		22.7582	1.338		18.7826	60.473		23.5673	8.278
			20.24	58.82		23.52	54.17		22.7905	1.28		18.8092	59.229		23.6007	8.261
			20.27	55.28		23.55	54.37		22.8228	1.346		18.8359	58.208		23.6341	8.233
			20.3	56.73		23.59	54.58		22.855	1.371		18.8625	57.506		23.6675	8.118
			20.33	58.13		23.62	54.87		22.8873	1.266		18.8892	56.795		23.701	8.129
			20.36	60.35		23.65	55.42		22.9196	1.309		18.9158	55.874		23.7344	8.102
			20.39	54.45		23.69	55.6		22.9519	1.342		18.9424	54.913		23.7678	8.014
			20.42	53.35		23.72	54.77		22.9842	1.395		18.9691	54.298		23.8012	8.003
			20.44	54.29		23.75	54.18		23.0164	1.372		18.9957	53.343		23.8347	7.972
			20.47	58.35		23.79	54.35		23.0487	1.306		19.0224	52.669		23.8681	7.872
			20.5	52.97		23.82	54.34		23.081	1.374		19.049	52.254		23.9015	7.915
			20.53	59.05		23.85	54.34		23.1133	1.27		19.0756	51.564		23.935	7.83
			20.56	59.36		23.89	54.22		23.1456	1.311		19.1023	50.896		23.9684	7.889
			20.59	58.53		23.92	54.17		23.1779	1.342		19.1289	50.189		24.0018	7.865
			20.62	57.81		23.95	54.16		23.2101	1.381		19.1556	49.561		24.0353	7.828
			20.64	57.8		23.99	53.79		23.2424	1.303		19.1822	49.046		24.0687	7.74
			20.67	58.59		24.02	53.4		23.2747	1.359		19.2089	48.6		24.1021	7.663
			20.7	57.17		24.05	53.49		23.307	1.287		19.2355	48.296		24.1355	7.713
			20.73	59.19		24.09	53.6		23.3393	1.34		19.2621	47.879		24.169	7.75
			20.76	59.34		24.12	54.11		23.3715	1.293		19.2888	47.505		24.2024	7.796
			20.79	59.42		24.15	54.07		23.4038	1.331		19.3154	47.083		24.2358	7.721
			20.82	59.67		24.19	53.86		23.4361	1.302		19.3421	46.763		24.2692	7.732
			20.85	59.18		24.22	53.28		23.4684	1.471		19.3687	46.337		24.3027	7.661
			20.87	59.2		24.25	55.32		23.5007	1.389		19.3954	45.917		24.3361	7.682
			20.9	59		24.29	51.37		23.5329	1.376		19.422	45.704		24.3695	7.606
			20.93	58.83		24.32	53.33		23.5652	1.392		19.4486	45.436		24.403	7.579
			20.96	58.55		24.35	53.44		23.5975	1.417		19.4753	45.159		24.4364	7.449
			20.99	59.91		24.39	54.3		23.6298	1.378		19.5019	44.677		24.4698	7.416
			21.02	59.01		24.42	53.49		23.6621	1.438		19.5286	44.56		24.5033	7.338
			21.05	58.8		24.45	53.43		23.6944	1.328		19.5552	44.431		24.5367	7.433
			21.07	58.41		24.49	55.21		23.7266	1.308		19.5818	43.924		24.5701	7.388
			21.1	58.47		24.52	53.45		23.7589	1.308		19.6085	43.539		24.6035	7.18
			21.13	58.11		24.55	52.38		23.7912	1.176		19.6351	43.341		24.637	7.246
			21.16	58.48		24.59	53.45		23.8235	1.217		19.6618	43.36		24.6704	7.256
			21.19	58.56		24.62	53.11		23.8558	1.265		19.6884	43.065		24.7038	7.233
			21.22	58.64		24.65	54.09		23.888	1.233		19.7151	42.885		24.7372	7.276
			21.25	57.7		24.69	53.17		23.9203	1.295		19.7417	42.717		24.7707	7.176
			21.28	57.73		24.72	52.83		23.9526	1.276		19.7683	42.504		24.8041	7.173
			21.3	57.96		24.75	53.53		23.9849	1.266		19.795	42.171		24.8375	7.214
			21.33	53.6		24.79	55.35		24.0172	1.255		19.8216	41.832		24.871	7.186
			21.36	46.4		24.82	52.6		24.0495	1.241		19.8483	41.716		24.9044	7.245
			21.39	47.04		24.85	53.67		24.0817	1.202		19.8749	41.427		24.9378	7.155
			21.42	56.44		24.89	53.29		24.114	1.193		19.9016	41.418		24.9713	7.125
			21.45	59.25		24.92	52.94		24.1463	1.183		19.9282	41.379		25.0047	7.123
			21.48	56.19		24.95	53.49		24.1786	1.235		19.9548	41.148		25.0381	7.093
			21.5	53.67		24.99	53.06		24.2109	1.262		19.9815	40.648		25.0715	7.278
			21.53	48.72		25.02	52.84		24.2431	1.227		20.0081	40.452		25.105	7.254
			21.56	49.85					24.2754	1.249		20.0348	39.972		25.1384	7.202
			21.59	54.78					24.3077	1.292		20.0614	40.272		25.1718	7.211
			21.62	51.5					24.34	1.121		20.088	40.507		25.2053	7.156
			21.65	54.26					24.3723	1.178		20.1147	40.982		25.2387	7.149
			21.68	57.16					24.4045	1.206		20.1413	41.676		25.2721	7.18
			21.71	57.52					24.4368	1.172		20.168	42.333		25.3055	7.118
			21.73	57.16					24.4691	1.198		20.1946	43.347		25.339	7.127
			21.76	56.55					24.5014	1.41		20.2213	44.548		25.3724	7.089
			21.79	56.26					24.5337	1.399		20.2479	46.486		25.4058	7.091
			21.82	55.9					24.566	1.301		20.2745	48.197		25.4393	7.061
			21.85	54.91					24.5982	1.359		20.3012	49.617		25.4727	7.055
			21.88	53.37					24.6305	1.421		20.3278	51.191		25.5061	7.092
			21.91	53.11					24.6628	1.41		20.3545	52.718		25.5395	7.122
			21.94	52.91					24.6951	1.393		20.3811	53.771		25.573	7.081
			21.96	51.6					24.7274	1.371		20.4078	54.673		25.6064	7.112
			21.99	51.41					24.7596	1.342		20.4344	55.34		25.6398	7.135
			22.02	51.49					24.7919	1.212		20.461	56.18		25.6733	7.145
			22.05	51.21					24.8242	1.119		20.4877	56.59		25.7067	7.064
			22.08	50.99					24.8565	1.112		20.5143	57.097		25.7401	7.097
			22.11	50.01					24.8888	1.183		20.541	57.696		25.7735	7.126
			22.14	48.23					24.921	1.12		20.5676	57.887		25.807	7.229
			22.16	45.41					24.9533	1.203		20.5942	57.809		25.8404	7.161
			22.19	46.63					24.9856	1.156		20.6209	57.735		25.8738	7.216
			22.22	46.6					25.0179	1.144		20.6475	57.655		25.9073	7.195
			22.25	48.88					25.0502	1.179		20.6742	57.404		25.9407	7.137
			22.28	46.61					25.0825	1.196		20.7008	57.238		25.9741	7.244
			22.31	46.44					25.1147	1.273		20.7275	56.716		26.0075	7.37
			22.34	45.12					25.147	1.138		20.7541	56.373		26.041	7.357
			22.37	48.11					25.1793	1.211		20.7807	55.409		26.0744	7.443
			22.39	48.94					25.2116	1.14		20.8074	54.78		26.1078	7.317
			22.42	49.99					25.2438	1.159		20.834	53.872		26.1413	7.363
			22.45	46.05					25.2761	1.169		20.8607	52.914		26.1747	7.303
			22.48	41.87					25.3084	1.2		20.8873	51.787		26.2081	7.283
			22.51	45.46					25.3407	1.195		20.9139	50.935		26.2416	7.176
			22.54	48.03					25.373	1.267		20.9406	49.947		26.275	7.174
			22.57	48.07					25.4053	1.184		20.9672	48.858		26.3084	7.245
			22.59	44.85					25.4375	1.222		20.9939	47.528		26.3418	7.207
			22.62	46.94					25.4698	1.11		21.0205	46.516		26.3753	7.045
			22.65	46.21					25.5021	1.205		21.0472	45.179		26.4087	7.091
			22.68	48.42					25.5344	1.22		21.0738	44.076		26.4421	7.13
			22.71	48.91					25.5667	1.413		21.1004	43.186		26.4755	7.072
			22.74	48.82					25.5989	1.171		21.1271	42.04		26.509	7.094
			22.77	48.71					25.6312	1.162		21.1537	40.572		26.5424	7.052
			22.8	48.75					25.6635	1.214		21.1804	39.824		26.5758	7.012
			22.82	48.94					25.6958	1.252		21.207	38.899		26.6093	6.986
			22.85	48.67					25.7281	1.226		21.2337	37.862		26.6427	7.01
			22.88	48.88					25.7603	1.164		21.2603	37.197		26.6761	7.054
			22.91	49.08					25.7926	1.206		21.2869	37.04		26.7096	6.984
			22.94	48.88					25.8249	1.14		21.3136	36.476		26.743	6.999
			22.97	48.66					25.8572	1.153		21.3402	36.023		26.7764	7.02
			23	48.66					25.8895	1.11		21.3669	35.569		26.8098	7.001
			23.02	49.17					25.9218	1.088		21.3935	35.378		26.8433	6.862
			23.05	48.83					25.954	1.07		21.4201	35.368		26.8767	6.882
			23.08	48.89					25.9863	1.104		21.4468	35.147		26.9101	7.044
			23.11	49.07					26.0186	1.114		21.4734	34.931		26.9435	6.966
			23.14	48.63					26.0509	1.02		21.5001	34.912		26.977	6.829
			23.17	46.95					26.0832	1.073		21.5267	34.824		27.0104	6.743
			23.2	46.82					26.1154	1.07		21.5534	34.573		27.0438	6.837
			23.23	47.11					26.1477	1.074		21.58	34.406		27.0773	6.773
			23.25	48.83					26.18	1.154		21.6066	34.36		27.1107	6.847
			23.28	49.43					26.2123	1.062		21.6333	34.248		27.1441	6.8
			23.31	49.43					26.2446	1.114		21.6599	34.383		27.1776	6.753
			23.34	49.58					26.2768	1.071		21.6866	34.423		27.211	6.637
			23.37	49.37					26.3091	0.99		21.7132	34.426		27.2444	6.568
			23.4	49.14					26.3414	1.191		21.7399	34.568		27.2778	6.603
			23.43	49.39					26.3737	1.115		21.7665	34.468		27.3113	6.544
			23.45	49.08					26.406	1.036		21.7931	34.934		27.3447	6.502
			23.48	49.13					26.4383	1.022		21.8198	34.93		27.3781	6.511
			23.51	49.59					26.4705	1.095		21.8464	34.945		27.4115	6.483
			23.54	50.12					26.5028	1.097		21.8731	35.243		27.445	6.5
			23.57	48.65								21.8997	35.396		27.4784	6.326
			23.6	47.96								21.9263	35.646		27.5118	6.38
			23.63	50.35								21.953	35.818		27.5453	6.398
			23.66	49.09								21.9796	35.88		27.5787	6.459
			23.68	49.53								22.0063	36.069		27.6121	6.387
			23.71	46.56								22.0329	36.082		27.6456	6.349
			23.74	48.83								22.0596	36.261		27.679	6.361
			23.77	49.21								22.0862	36.452		27.7124	6.321
			23.8	49.37								22.1128	36.665		27.7458	6.23
			23.83	48.9								22.1395	36.681		27.7793	6.269
			23.86	49.61								22.1661	37.024		27.8127	6.338
			23.88	49.18								22.1928	36.779		27.8461	6.413
			23.91	49.72								22.2194	36.935		27.8795	6.392
			23.94	49.25								22.2461	36.939		27.913	6.339
			23.97	49.72								22.2727	37.226		27.9464	6.347
			24	49.28								22.2993	37.396		27.9798	6.262
			24.03	49.94								22.326	37.626		28.0133	6.332
			24.06	49.36								22.3526	37.595		28.0467	6.317
			24.09	49.36								22.3793	37.623		28.0801	6.206
			24.11	48.43								22.4059	37.724		28.1136	6.091
			24.14	49.65								22.4325	37.596		28.147	6.13
			24.17	49.73								22.4592	37.556		28.1804	6.064
			24.2	49.85								22.4858	37.715		28.2138	6.088
			24.23	47.44								22.5125	37.559		28.2473	6.134
			24.26	45.43								22.5391	37.883		28.2807	6.135
			24.29	50.19								22.5658	37.948		28.3141	6.079
			24.31	50.24								22.5924	37.937		28.3476	6.128
			24.34	50.63								22.619	37.86		28.381	6.087
			24.37	50.25								22.6457	37.622		28.4144	6.072
			24.4	51.29								22.6723	37.698		28.4478	6.026
			24.43	51.63								22.699	37.727		28.4813	6.026
			24.46	51.74								22.7256	37.92		28.5147	6.057
			24.49	51.87								22.7522	37.959		28.5481	6.035
			24.52	51.99								22.7789	37.923		28.5816	6.054
			24.54	53.47								22.8055	37.953		28.615	6.019
			24.57	53.12								22.8322	37.738		28.6484	6.054
			24.6	53.81								22.8588	37.901		28.6818	6.003
			24.63	52.35								22.8854	37.904		28.7153	6.045
			24.66	51.84								22.9121	38.006		28.7487	6.06
			24.69	48.32								22.9387	37.99		28.7821	6.123
			24.72	49.27								22.9654	38.145		28.8156	6.019
			24.74	49.77								22.992	37.937		28.849	6.067
			24.77	50.71								23.0187	37.92		28.8824	6.118
			24.8	48.65								23.0453	37.94		28.9158	6.065
			24.83	48.22								23.072	38.096		28.9493	6.1
			24.86	49.64								23.0986	37.947		28.9827	5.977
			24.89	49.58								23.1252	38.177		29.0161	6.072
			24.92	49.43								23.1519	38.322		29.0496	5.972
			24.95	49.76								23.1785	38.394		29.083	6.098
			24.97	49.78								23.2052	38.496		29.1164	5.959
			25	49.6								23.2318	38.242		29.1499	5.949
			25.03	49.99								23.2584	38.324		29.1833	5.835
			25.06	49.68								23.2851	38.493		29.2167	5.974
			25.09	50.07								23.3117	38.795		29.2501	5.94
			25.12	49.61								23.3384	38.875
			25.15	49.93								23.365	39.06
			25.18	49.95								23.3916	39.06
			25.2	49.84								23.4183	39.146
			25.23	50.2								23.4449	39.369
			25.26	49.65								23.4716	39.387
			25.29	49.65								23.4982	39.405
			25.32	49.53								23.5249	39.635
			25.35	49.44								23.5515	39.417
			25.38	49.62								23.5782	39.607
			25.4	49.99								23.6048	39.472
			25.43	50.19								23.6314	39.465
			25.46	48.11								23.6581	39.498
			25.49	50.07								23.6847	39.501
												23.7114	39.65
												23.738	39.477
												23.7646	39.712
												23.7913	39.903
												23.8179	39.916
												23.8446	40.055
												23.8712	40.002
												23.8978	40.074
												23.9245	39.974
												23.9511	40.184
												23.9778	40.222
												24.0044	40.142
												24.0311	40.205
												24.0577	40.284
												24.0843	40.191
												24.111	40.297
												24.1376	40.301
												24.1643	40.448
												24.1909	40.481
												24.2175	40.406
												24.2442	40.358
												24.2708	40.119
