# Supplementary material for: Membrane-mediated dimerization potentiates PIP5K lipid kinase activity
Source: eLife. 2022 Aug 17;11:e73747. doi: 10.7554/eLife.73747 (PMC9470164; doi:10.7554/eLife.73747)
Supplement: Figure 1—figure supplement 2—source data 1. [file elife-73747-fig1-figsupp2-data1.xlsx]

## Sheet: Figure 1 - Fig Supp 2
Figure 1 - Figure Supplement 2
Figure FS2A			Figure FS2B			Figure FS2C
Experiment 1			Experiment 2			Experiment 3
[mNG] nM	mNG intensity		[mNG] nM	mNG intensity		[mNG] nM	mNG intensity
222.7	52138		125	42224		156.3	50372
111.3	25787		62.5	21250		78.1	24925
55.7	12693		31.3	10603		39.1	12664
27.8	6345		15.6	5259		19.5	6177
13.9	3197		7.8	2631		9.8	3256
7	1592		0	14		0	21
3.5	766
0	17
