# Supplementary material for: Membrane-mediated dimerization potentiates PIP5K lipid kinase activity
Source: eLife. 2022 Aug 17;11:e73747. doi: 10.7554/eLife.73747 (PMC9470164; doi:10.7554/eLife.73747)
Supplement: Figure 1—figure supplement 3—source data 1. [file elife-73747-fig1-figsupp3-data1.xlsx]

## Sheet: Figure 1 - Fig Supp 3
Figure 1 - Figure Supplement 3
Fluorescence Intensity (Bin Center)	Frequency (Ax488-PIP4K)	Bin Center	Frequency (Ax488-PIP5KB)
1000	0	1000	0		n = 72085 particles analyzed for Ax488-PIP4KB
1400	0	1200	0		n = 16431 particles analyzed for Ax488-PIP5KB
1800	0.000152598	1400	0		bin center = single particle fluorescence intensity
2200	0.0274121	1600	0
2600	0.120178	1800	0
3000	0.119206	2000	0.00146065
3400	0.11646	2200	0.0163715
3800	0.110065	2400	0.0493579
4200	0.13706	2600	0.0901345
4600	0.156315	2800	0.119348
5000	0.105209	3000	0.142109
5400	0.0517167	3200	0.14996
5800	0.0270653	3400	0.141562
6200	0.0209336	3600	0.10821
6600	0.00645072	3800	0.0642079
7000	0.00147049	4000	0.0276916
7400	0.000235833	4200	0.0140588
7800	6.93626e-05	4400	0.010042
8000	0	4600	0.0105897
		4800	0.00992027
		5000	0.010468
		5200	0.0124764
		5400	0.0111983
		5600	0.00651208
		5800	0.00340819
		6000	0.000669466
		6200	0.000121721
		6400	6.08606e-05
		6600	6.08606e-05
		6800	0
		7000	0
		7200	0
		7400	0
		7600	0
		7800	0
		8000	0
