# Supplementary material for: Membrane-mediated dimerization potentiates PIP5K lipid kinase activity
Source: eLife. 2022 Aug 17;11:e73747. doi: 10.7554/eLife.73747 (PMC9470164; doi:10.7554/eLife.73747)
Supplement: Figure 1—figure supplement 4—source data 1. [file elife-73747-fig1-figsupp4-data1.xlsx]

## Sheet: Figure 1 - Fig Supp 4
Figure 1 - Figure Supplement 4B				Figure 1 - Figure Supplement 4C					Figure 1 - Figure Supplement 4D												Figure 1 - Figure Supplement 4D														Figure 1 - Figure Supplement 4E												Figure 1 - Figure Supplement 4E
time (sec)	mNG-5KA intensity	background intensity		time (sec)	mNG-z5KA intensity	background intensity			Single mNG-5KA particle intensities (raw data)												Frequency distributions of mNG-5KA molecular brightness														Single mNG-z5KA particle intensities (raw data)												Frequency distributions of mNG-z5KA molecular brightness
0	7209	1478		0	6286	1496		N =	1149	876	748	756	703	649	693	612	608	564	581		mNG-5KA intensity (bin center)	0 sec	1 sec	2 sec	3 sec	4 sec	5 sec	6 sec	7 sec	8 sec	9 sec	10 sec		N =	966	1003	979	864	846	948	905	916	856	920	810		mNG-z5KA intensity (bin center)	0 sec	1 sec
0.1	3850	515		0.1	4915	717		time =	0 sec	1 sec	2 sec	3 sec	4 sec	5 sec	6 sec	7 sec	8 sec	9 sec	10 sec		0	0	0	0	0	0	0	0	0	0	0	0		time =	0 sec	1 sec	2 sec	3 sec	4 sec	5 sec	6 sec	7 sec	8 sec	9 sec	10 sec		0	0	0
0.2	6058	1722		0.2	4711	1621			5863	5419	5302	5824	4123	3707	5279	3738	4345	3264	4291		400	0	0	0	0	0	0	0	0	0	0	0			6857	7887	8004	3894	4747	4277	4742	4109	5418	6602	7153		400	0	0
0.3	7011	2624		0.3	5779	728			2761	3894	2673	4264	3714	3502	4026	5544	6104	6017	5520		800	0	0	0	0	0	0	0	0	0	0	0			8212	2963	4065	3713	9755	4952	3602	6963	5189	4346	5622		800	0	0
0.4	6683	1389		0.4	5060	503			6081	3486	3010	4162	5805	4702	3045	7130	5096	3724	5219		1200	0	0	0	0	0	0	0.001443	0	0	0	0.00172117			7808	5166	8032	8978	3470	5857	6650	6155	7852	5724	6734		1200	0	0
0.5	5445	1174		0.5	4861	1683			4685	2613	3782	4218	5201	2685	4293	4199	5037	4062	5548		1600	0.0078329	0.00456621	0.00668449	0.00925926	0.0142248	0.0215716	0.00865801	0.00490196	0.00822368	0.0070922	0.00688468			5254	6763	3355	6058	4654	10646	7115	11720	6424	5878	4165		1600	0	0
0.6	5817	1172		0.6	5798	1542			8893	4011	6304	5965	3935	4568	4180	2429	5633	2614	3530		2000	0.0191471	0.0262557	0.0213904	0.0343915	0.0398293	0.0246533	0.027417	0.0310458	0.0361842	0.0425532	0.0395869			5392	6406	3915	5213	4367	7845	10261	4614	6630	3837	5076		2000	0	0
0.7	5668	1922		0.7	6005	1898			3288	6715	7661	2711	5975	7219	4551	5947	3878	3444	4193		2400	0.0348129	0.0547945	0.065508	0.0542328	0.0540541	0.0508475	0.0548341	0.0620915	0.0690789	0.070922	0.0688468			6721	5099	7712	4427	4932	8749	6859	6737	4411	3689	7947		2400	0.00310559	0
0.8	4897	2659		0.8	7151	1212			4994	8136	4319	5988	4095	3404	5345	4127	4339	2957	3927		2800	0.048738	0.076484	0.0668449	0.0661376	0.0739687	0.0662558	0.0779221	0.0784314	0.100329	0.0851064	0.10327			6287	6190	5508	4972	7066	4964	3795	6139	5283	4320	5411		2800	0.00931677	0.0189432
0.9	8078	1336		0.9	5690	1282			4724	6676	5482	5277	3524	3933	5132	2182	3789	3888	4003		3200	0.0609225	0.0742009	0.100267	0.0965608	0.0881935	0.101695	0.106782	0.0931373	0.100329	0.115248	0.101549			6992	4760	5372	7171	9452	4273	5809	4956	3310	8643	6333		3200	0.0414079	0.0378863
1	6547	1239		1	6743	1245			5148	6708	2476	3300	2419	3242	6014	6686	3963	3419	7382		3600	0.0791993	0.116438	0.106952	0.0952381	0.0995733	0.115562	0.121212	0.124183	0.123355	0.111702	0.130809			4771	8410	5725	3268	5593	4376	5197	4040	3931	4662	11427		3600	0.0652174	0.0727817
1.1	6227	1632		1.1	6155	1679			4952	7258	4317	3068	1567	4673	1499	5539	3556	2832	3644		4000	0.0774587	0.115297	0.113636	0.123016	0.118065	0.117103	0.12987	0.117647	0.129934	0.173759	0.111876			4883	5947	4183	3663	3605	5412	5629	5351	6364	4539	3004		4000	0.0776398	0.107677
1.2	4704	2199		1.2	6575	1139			5643	2687	6429	3325	3460	4620	4780	3157	5235	4908	5513		4400	0.113142	0.101598	0.0949198	0.124339	0.12091	0.11094	0.121212	0.129085	0.113487	0.108156	0.0963855			4911	7684	6339	3720	6537	6246	5456	4897	9012	9959	4915		4400	0.10766	0.120638
1.3	7088	843		1.3	4777	906			3452	5118	5422	4394	5212	3566	3288	5232	3844	3721	3181		4800	0.109661	0.109589	0.104278	0.107143	0.123755	0.120185	0.10101	0.102941	0.0970395	0.10461	0.101549			6570	4949	5495	5268	4719	3928	6495	4063	4643	5733	3247		4800	0.127329	0.154536
1.4	5528	1131		1.4	7789	1839			10977	6408	4614	3093	7263	3817	2946	6022	2222	5351	3664		5200	0.0887728	0.0799087	0.102941	0.0753968	0.0953058	0.0862866	0.0750361	0.0849673	0.0625	0.0797872	0.0946644			4074	6761	4819	10487	4806	4792	5906	3905	5873	3773	5555		5200	0.112836	0.104686
1.5	6381	987		1.5	5495	967			7123	5915	5728	3426	3482	5172	5666	4146	2721	3934	2663		5600	0.0948651	0.0673516	0.0668449	0.0701058	0.0512091	0.0708783	0.0577201	0.0767974	0.0476974	0.0319149	0.060241			6243	5669	11813	4350	6254	3841	3820	4543	5433	6245	4871		5600	0.114907	0.109671
1.6	6539	626		1.6	4903	1170			7827	7844	4162	2503	3540	3132	3974	3499	6919	6900	3967		6000	0.0696258	0.0468037	0.0454545	0.0595238	0.0540541	0.0416025	0.036075	0.0408497	0.0378289	0.0248227	0.0430293			6213	5683	5615	4438	7644	5191	3665	3791	6559	6691	3851		6000	0.0859213	0.0687936
1.7	5592	618		1.7	5859	1647			6472	4903	9333	5705	7018	6378	3862	4887	3431	6461	4902		6400	0.0600522	0.0410959	0.0347594	0.0343915	0.0184922	0.0292758	0.030303	0.0163399	0.03125	0.0159574	0.0223752			4875	6473	3399	4964	5220	3474	4655	5187	3726	4628	3054		6400	0.0621118	0.0638086
1.8	5306	1054		1.8	6526	1843			7426	8157	3937	3347	4672	5101	4557	5337	5983	2780	2631		6800	0.0382942	0.0262557	0.0240642	0.0198413	0.0142248	0.0123267	0.021645	0.0147059	0.0180921	0.0141844	0.00516351			6976	3856	4379	7178	4715	4239	4111	3974	4346	5981	5375		6800	0.0496894	0.0418744
1.9	5259	1595		1.9	3999	626			2292	2580	6548	2448	2792	2949	2312	5836	2656	4343	3196		7200	0.0304613	0.0262557	0.0160428	0.0171958	0.0142248	0.00616333	0.011544	0.0147059	0.00986842	0.0070922	0.00344234			6611	6152	4957	2934	5019	3848	3738	4161	10691	3215	5650		7200	0.0341615	0.0239282
2	6430	1515		2	5892	1914			4343	5309	4977	4529	4770	7709	4950	5631	2163	3467	3820		7600	0.0261097	0.0136986	0.013369	0.00529101	0.0128023	0.00924499	0.00865801	0	0.00493421	0.00177305	0.00344234			5758	6686	4536	6214	4432	4639	6739	3510	3986	4464	3152		7600	0.0238095	0.0159521
2.1	5276	1242		2.1	7290	961			5615	6454	5550	3695	3127	4875	4606	4990	3682	4841	3912		8000	0.0174064	0.0114155	0.00668449	0.00661376	0.00426743	0.00616333	0.004329	0.00490196	0.00328947	0.0035461	0			6756	3850	4793	5450	4606	3349	3408	3871	7132	4168	4174		8000	0.00724638	0.00797607
2.2	5687	923		2.2	4844	1121			5922	5095	3353	3576	5237	3456	5742	3351	2513	6012	3165		8400	0.00522193	0.00228311	0.0026738	0.00132275	0.00142248	0.00616333	0.001443	0.00163399	0.00328947	0	0.00172117			7717	10655	2538	4137	4700	5296	3341	4795	5360	3637	5939		8400	0.010352	0.00897308
2.3	6764	1249		2.3	5532	1314			7713	5952	3570	5430	5731	2875	4315	4567	4153	2720	5002		8800	0.00609225	0.00114155	0	0	0	0	0	0.00163399	0	0.00177305	0			6359	6591	5963	4429	3232	4278	3450	4134	5119	4098	5563		8800	0.00621118	0.00598205
2.4	4669	719		2.4	5247	1399			6273	5963	3848	6116	3437	2764	4034	3818	3228	4477	2011		9200	0.00609225	0.00114155	0.0013369	0	0	0.00154083	0.001443	0	0	0	0.00344234			5527	5259	5395	5268	4549	3834	5987	4274	3397	5609	4551		9200	0.010352	0.00299103
2.5	8289	1216		2.5	6197	1396			6224	3625	2912	5701	2993	5533	4789	5727	8275	5439	3841		9600	0.000870322	0	0	0	0.00142248	0	0	0	0.00164474	0	0			8018	5300	4430	4517	4165	4988	4205	3343	5166	5105	3292		9600	0.00517598	0.00299103
2.6	6872	594		2.6	5476	1185			7654	7284	2894	4460	6493	5349	4632	5258	4909	3928	6242		10000	0.00174064	0.00114155	0.0026738	0	0	0	0.001443	0	0	0	0			5152	4811	9974	4314	4987	4471	3895	3772	6816	5161	2719		10000	0.00310559	0.00299103
2.7	5866	848		2.7	4826	1111			7542	5699	2373	4023	4816	3542	3668	3539	5441	4953	2732		10400	0.000870322	0.00114155	0	0	0	0.00154083	0	0	0.00164474	0	0			6771	4822	5275	4353	3960	6463	4090	3128	4821	5198	3223		10400	0.00828157	0.00299103
2.8	3968	1176		2.8	2640	1499			4588	6871	2577	5884	5400	4153	4998	3645	6514	3582	2506		10800	0.00174064	0	0	0	0	0	0	0	0	0	0			9222	4806	6159	4937	4077	3220	3111	5678	3993	4448	9154		10800	0.00517598	0.00299103
2.9	6670	1303		2.9	655	1464			4291	5835	4683	3668	2907	3395	4865	3549	4401	2958	2719		11200	0	0	0	0	0	0	0	0	0	0	0			4911	7467	4595	4399	3913	2638	4703	5697	5884	4217	5499		11200	0.00310559	0.00199402
3	6952	826		3	1540	1322			2555	7192	1716	4690	3756	2354	5543	3626	1749	4015	3904		11600	0.000870322	0	0.0013369	0	0	0	0	0	0	0	0			6083	9631	4058	4075	5253	5041	4018	4927	5681	4067	3870		11600	0.00207039	0.00199402
3.1	7099	960		3.1	1166	872			8281	4785	2837	6447	5267	3917	4443	2682	4508	5849	5142		12000	0	0	0	0	0	0	0	0	0	0	0			5433	4349	2376	6815	4471	3432	5214	2825	4864	5236	4819		12000	0.00414079	0.00398804
3.2	5058	1051		3.2	1348	1194			8280	6299	5728	4637	4946	4991	2496	4726	2800	3327	6347		12400	0	0.00114155	0.0013369	0	0	0	0	0	0	0	0			7120	5330	5229	4741	4020	4054	5564	6001	3486	4662	5628		12400	0.00414079	0.00299103
3.3	6774	1628		3.3	1275	2051			6537	6086	4219	3791	5762	3390	2724	2808	2957	2034	4354																5077	12680	6377	3483	5723	4976	5199	4429	4136	4145	4762		12800	0.00207039	0.00598205
3.4	5279	1516		3.4	1015	1120			5131	4675	2365	3805	4969	4283	3050	2653	5806	4041	5741																5738	7619	3913	3201	4063	4745	7234	2572	5462	4119	5755		13200	0.00517598	0.000997009
3.5	4500	1037		3.5	1032	1175			2982	5041	3880	5958	8352	4570	5981	4783	4726	3185	5106																3993	4910	4669	4107	6741	5360	4920	14358	3958	3138	4593		13600	0.0010352	0.000997009
3.6	5880	2038		3.6	870	1218			6319	4998	5269	4716	5386	3661	4715	5283	4509	2437	6388																11924	6782	4450	6840	5115	6485	4447	2915	5867	3974	5015		14000	0.00310559	0.000997009
3.7	5179	2280		3.7	994	1442			6226	3864	3958	5497	2479	4945	3667	5418	2743	7318	3606																4687	4987	5553	4379	4918	2590	5356	4101	5119	3620	5935		14400	0.0010352	0.000997009
3.8	5279	1012		3.8	2147	1268			6460	5804	5423	7032	4677	2643	6430	3793	5407	2769	2721																7280	3464	5535	4507	4380	5817	5250	4318	4233	5031	3031		14800	0	0
3.9	6092	627		3.9	790	902			5382	4372	4822	4355	5758	4383	5823	5704	3997	2390	4420																4617	4756	5216	2938	5418	2990	7747	5743	5614	4759	3303		15200	0.00207039	0
4	5251	515		4	1053	767			6170	5249	3558	3939	4052	8513	5423	3773	3627	1741	5058																15140	5539	5859	3932	3983	5529	3438	8240	5164	3205	5832		15600	0.0010352	0
4.1	6956	2210		4.1	1131	808			1899	3868	9804	7143	5010	3942	4096	2349	6669	4556	3245																4968	6084	3719	3304	5152	3988	3611	4534	6706	5599	5400		16000	0	0
4.2	5552	1619		4.2	1020	704			7140	5264	3953	5257	5968	4967	3554	5818	2779	2732	3151																5329	4449	5647	3511	5417	3537	4032	5117	6715	3956	4927		16400	0	0
4.3	5088	801		4.3	815	1038			4484	2627	4351	5155	5026	6382	2385	4395	2556	2561	3649																4902	3867	5645	2831	3040	3418	4742	4913	5444	3952	6202		16800	0	0
4.4	6046	843		4.4	755	1541			4514	3775	4035	4904	6155	4032	2915	6050	2982	4610	2764																4117	6012	4671	3093	5300	4122	3446	4772	3570	4460	5839		17200	0	0
4.5	6733	244		4.5	657	655			6941	3176	3218	3668	5180	5103	2958	4093	3638	4987	2049																5418	4106	6377	4600	4430	5071	4082	4946	4317	4881	3647		17600	0	0
4.6	4919	1547		4.6	1123	1003			8983	3148	3347	5865	3918	5533	2641	5009	4480	3383	5903																4881	4104	4825	5687	4720	3991	5832	5359	4857	3657	3881		18000	0	0
4.7	6441	1632		4.7	2125	794			5968	3323	5181	3602	2021	4555	3882	3973	3315	4800	3546																6412	4518	6067	5229	5090	3942	5400	2960	3372	4490	2886		18400	0	0
4.8	7579	1611		4.8	725	541			5809	5261	5033	2611	3826	4734	4140	6709	5663	5501	5591																6748	3773	2796	4838	3679	2541	2662	4440	5383	5515	3264		18800	0	0
4.9	5726	902		4.9	858	1186			4386	3330	3074	3112	4410	5110	4268	5646	4116	4122	2996																5860	4052	5548	3285	5110	3391	4531	3811	5119	5460	3512		19200	0	0
5	3695	1028		5	751	974			5666	2628	2239	2447	4896	2302	2084	7996	5211	4128	3721																4423	4591	5605	3722	4046	6634	5460	3894	4333	4417	6110		19600	0	0
5.1	6075	580		5.1	1265	986			5615	2627	4411	3212	4976	5827	3813	4813	2669	4132	3464																4381	4569	4104	4071	5576	5428	3616	5437	4578	6958	4938		20000	0	0
5.2	6185	1264		5.2	872	1053			6418	2731	2309	3503	5833	2509	6433	4201	5887	3459	4026																5200	4841	4941	3409	4156	4415	5660	7595	4684	5066	3621		20400	0	0
5.3	6918	1532		5.3	1318	1124			3532	2190	3030	4527	4998	2507	6053	4825	3979	3090	3469																5962	5594	2954	5702	3964	8506	2849	6321	4073	4967	3608		20800	0	0
5.4	6063	684		5.4	1724	1733			4602	6035	4686	5165	4326	4140	3972	4345	3035	2371	5245																4232	5332	5105	4268	3743	5366	5867	3160	4915	4248	3653
5.5	5028	625		5.5	705	1229			5225	2782	2751	4027	4505	1905	3151	2154	1645	4153	5267																3396	14081	4962	6118	3056	7150	3559	3917	4094	5209	5775
5.6	5557	2269		5.6	2090	1194			5515	2484	4887	4636	3773	4401	3840	4607	4284	4027	5774																10341	4441	5374	3398	5541	3746	5617	5102	4274	4773	2465
5.7	5268	901		5.7	1854	643			3936	8320	6605	7998	3282	5093	4594	5266	3438	2512	3758																3586	6739	4951	3938	6887	4711	4963	3667	3901	4653	4203
5.8	5138	720		5.8	1888	1251			5616	3913	3759	3842	2598	3685	3536	4931	2900	2629	3844																4117	4342	3505	4660	6526	4160	4077	3460	4589	4390	4683
5.9	6407	1373		5.9	2682	988			4888	4576	4455	2896	3653	4144	3123	3058	3742	2226	5576																4595	9941	3973	5016	5940	6009	3389	8166	5638	3063	3415
6	4944	720		6	2116	1121			4807	2273	7508	5034	6016	1568	6628	2494	1864	4559	2417																3625	5738	5613	4058	3843	3033	4969	4970	5673	3916	4612
6.1	4092	1061		6.1	653	918			4695	3373	3367	3731	3586	4046	3787	4751	4936	2149	4978																5580	6213	3313	5250	7275	6027	5570	5650	4771	4377	5849
6.2	6273	1069		6.2	1413	1006			6097	4949	2799	2831	4625	5669	5694	3941	1899	4668	4789																4916	7283	6164	4748	5334	4016	4520	3203	6153	5321	3937
6.3	5303	975		6.3	1297	132			4408	2681	3042	8228	4590	3609	6531	3945	2537	3159	5371																5171	3421	4718	5556	4558	3801	3717	6877	3737	4377	4711
6.4	6832	833		6.4	730	1178			3980	4782	5155	7922	4997	8070	4175	3321	3940	2169	5055																11846	4737	4243	5640	4618	4405	4027	3420	3722	4722	5070
6.5	7434	626		6.5	823	646			2783	1959	4217	2742	6390	3467	2482	5063	2779	2521	4430																6685	5120	5931	3698	6272	4536	3296	3703	5377	4211	3366
6.6	5629	571		6.6	792	1667			2715	4789	2267	4394	5896	4468	3489	3672	6482	4241	5343																3151	6589	6159	6940	5042	4978	5530	4641	4207	6712	4054
6.7	7967	1174		6.7	1142	829			3729	5027	5149	4214	3282	3978	3816	3781	3829	3813	2865																7626	3048	6921	3792	3851	4405	7051	3654	4364	4613	5100
6.8	5703	1372		6.8	2044	2021			3875	7407	5060	6006	5691	4740	3170	4291	4970	2141	3735																9231	3409	3795	5895	4679	3640	3105	4990	4178	5918	6378
6.9	4866	1297		6.9	1106	775			3745	4635	5680	5245	3327	3105	3156	4273	5048	5557	3198																13831	4112	4193	5139	3740	3605	3464	6362	3751	3262	3711
7	5419	602		7	2361	459			3706	6074	5979	3343	4253	3262	3357	5468	4440	4107	5265																7504	6041	4547	4943	4425	5846	3341	3729	4176	3556	3365
7.1	3984	2218		7.1	1097	1051			6058	2187	3335	4383	1562	5875	4896	4233	3693	5210	5785																6068	5179	6226	7497	3286	6597	4304	4863	5659	3733	5794
7.2	4109	972		7.2	1374	1051			5058	4108	5416	2821	4507	4738	6775	2244	8263	3793	5046																5532	6952	7508	3879	3636	4754	4644	6298	5457	4046	5608
7.3	5094	1260		7.3	1259	1241			3939	5041	5195	4800	2905	2567	5282	4728	3110	4638	5342																7799	7664	4654	7937	3867	4524	5286	5073	6122	3664	6338
7.4	4667	937		7.4	669	939			3450	4384	5935	4090	5617	5540	4672	3719	3394	2937	2548																4137	4632	7560	4261	5398	4584	4427	3785	4608	6181	5630
7.5	6717	834		7.5	1360	1271			3331	2043	6985	2302	2853	3194	4634	3618	3453	3207	3138																3619	3461	4805	5133	3043	4417	2956	5466	4519	4182	5116
7.6	5782	595		7.6	938	521			2581	3208	6541	6343	4669	2863	2409	5408	1786	5087	6044																4858	3822	4638	4464	2805	4088	3873	4104	3678	4504	3521
7.7	6812	1581		7.7	1584	911			3361	5071	2339	5971	5828	2813	4035	3007	4497	4044	2583																3669	4386	5354	5082	4324	5262	4251	4704	3947	4479	5241
7.8	4615	2110		7.8	1377	803			4459	4545	4240	3973	7518	4674	2768	3739	3946	4170	1545																5986	5167	3887	4653	3882	5211	5949	2971	3715	6447	3379
7.9	617	1350		7.9	989	1179			2281	4560	4810	3413	6054	3908	3296	4979	2419	4978	3543																4863	4165	5385	7762	4771	6180	2927	3879	6037	5151	3146
8	1085	755		8	1745	1319			3109	2537	3815	5391	3939	4395	2622	5827	3087	2978	2704																9197	3799	6946	5463	3645	4275	4713	4963	5163	4375	6754
8.1	1027	1050		8.1	1057	1065			3617	7806	4351	5116	2962	2785	2841	4111	4315	5034	3206																11009	3858	4431	5228	4353	3624	3300	3627	4750	6213	4663
8.2	782	514		8.2	1450	619			2899	5056	4148	4492	3412	4215	3908	6242	3517	4039	5720																4638	3645	4682	6078	3684	5084	5399	4331	3124	3955	4209
8.3	863	2377		8.3	1251	1992			7089	2991	3407	4325	3362	5736	3974	5779	5228	2980	1927																5501	4153	4733	2942	4617	4566	4337	5097	3711	3470	5350
8.4	513	921		8.4	795	1223			4892	3597	4604	3347	3688	3315	6548	4383	3489	6276	4790																7070	7252	3806	6029	9458	3902	5143	3181	3383	5266	5150
8.5	1385	1368		8.5	1411	1050			3905	5188	3804	3927	5852	3589	3250	4375	3273	2436	2324																4645	5407	5509	3743	6555	4716	4258	3486	4055	5050	7262
8.6	726	291		8.6	989	2522			3522	5060	5580	3130	2326	4722	4543	5830	5479	3581	5026																5013	5890	3710	3731	5183	3706	4705	3081	3452	4853	4618
8.7	1017	1200		8.7	510	641			4526	2362	4948	4086	4212	4396	3638	4123	2835	3945	4497																5660	5457	4396	5223	2872	5238	3375	2482	4292	4867	5740
8.8	964	1601		8.8	756	986			6713	5302	7091	2067	3041	6236	5350	6010	3671	5061	5349																5338	5177	3840	4222	8764	4349	2563	5361	2853	4561	12143
8.9	974	1212		8.9	1215	1868			4721	4770	4199	2750	5016	4209	3429	4337	5629	3161	5660																6539	4086	3729	6021	5332	3346	3673	4683	4087	3575	3387
9	898	1297		9	1336	1755			3582	2983	4024	3189	5491	5936	1836	3334	3443	3988	3911																4223	3921	4980	3900	9478	3411	4041	3237	6597	2788	2685
9.1	779	1202		9.1	376	1038			2722	5951	4943	4042	1600	5190	5311	4702	4373	3924	2301																4584	5594	4856	4613	5224	4730	5971	3920	4159	2757	4683
9.2	331	1200		9.2	821	1126			7049	5099	3996	4339	3455	3850	7188	3568	5418	3970	3716																5442	3945	6246	4004	6188	5132	4541	3725	3859	3570	3062
9.3	983	1272		9.3	805	1234			7092	6712	3360	3507	3833	3209	4287	3310	4714	4249	6071																6049	4989	4803	3504	3716	4072	4438	5517	4833	6709	3815
9.4	1215	716		9.4	2021	456			5777	3786	7832	4434	4465	2972	4131	3389	6439	2187	2834																7735	4314	4424	10701	4104	7120	5840	6603	4640	5514	6166
9.5	1151	1226		9.5	935	1013			7666	5159	4459	5618	5206	6566	5807	3291	4525	2523	3867																7763	5929	3876	6552	5904	6524	4466	5462	4088	5433	3886
9.6	1544	1360		9.6	840	1069			5717	5255	5751	3716	5242	4828	4591	4408	2200	4400	4865																5548	4596	2863	5794	6309	10336	3312	4557	4397	4106	4668
9.7	1506	941		9.7	1200	1286			4647	5355	3666	5890	5362	5055	3162	3816	4475	2789	5872																6106	5796	2985	3722	4374	4755	4414	6078	4196	5506	4980
9.8	1282	1991		9.8	963	1262			6403	5447	3210	3179	3438	5271	3242	3073	5288	3310	2671																4356	4726	7143	4342	4441	4558	5172	4640	8259	4056	4237
9.9	1230	1659		9.9	782	515			3943	7168	5235	5213	6019	3011	1839	3546	2880	4834	3256																8378	4869	3596	6951	5452	5473	6203	5048	4647	3642	5260
10	1214	815		10	1216	952			7574	6958	3582	3986	4092	2937	3932	5717	1858	3437	5967																5539	4183	4055	3764	3535	4658	3917	3656	6229	5894	5569
10.1	1322	1248							7941	4959	2820	4420	6037	5751	5250	2957	2607	3870	5314																6303	4756	2796	3431	3197	4984	8447	5026	6095	7111	4431
10.2	820	1061							6038	4918	3879	4883	7252	4303	3982	4331	2115	7016	4830																6909	3124	2155	3727	5463	4736	5563	4007	4762	6214	3254
10.3	1635	1084							4984	6239	2748	4613	4182	3475	4162	1997	3597	5858	5021																8391	5419	6855	6908	4064	4787	11932	3621	3982	5675	4277
10.4	1002	1020							8701	7784	2194	5852	3480	4309	4802	4944	4674	3514	3681																7413	5553	4746	8410	5284	4790	4666	3875	9598	8151	8935
10.5	737	1502							6234	6695	4705	4654	2645	3650	6171	3640	3588	4594	3819																6621	4411	4613	4852	5029	5831	3521	4141	4959	6485	6405
10.6	1620	1026							6022	6521	3365	5730	4992	5613	6121	3714	4920	3190	4430																7713	8210	4055	4666	3615	4687	4371	4179	2785	6305	3842
10.7	611	1659							5684	5394	2730	4438	2868	5098	3831	3801	3730	2631	5819																9088	4255	6323	4623	5463	4095	5780	3622	5334	5572	4691
10.8	1868	934							5081	6448	4106	3545	5821	5008	2495	3354	4604	2107	4735																4834	7116	5913	4767	5628	4975	5969	4912	5113	4891	3680
10.9	1047	1693							6945	2847	3967	6083	3951	4678	4086	5225	7185	4843	6400																5469	5639	10172	3118	5070	6053	6568	3748	5070	4245	5540
11	1802	1004							5744	5161	3207	5379	3212	5359	3083	4323	5202	4796	4061																6157	4814	5932	5596	3560	3743	5591	5831	6412	4529	3792
11.1	1192	404							6240	6810	2144	3869	3842	4857	3089	7001	3962	2633	2040																5246	5458	5895	3424	4944	4714	6790	3074	4125	4825	4540
11.2	705	1198							6133	4453	3613	5130	2959	3881	3359	2840	2228	4547	3579																5847	6404	5662	4094	4928	3379	6855	5474	4430	4559	7064
11.3	911	985							8049	4863	3354	5856	5189	5231	4544	3625	1774	2221	4381																5496	5805	5070	6644	5533	4870	3111	4907	5098	4253	4301
11.4	482	1614							10954	2969	3678	5106	2443	2264	4962	2885	4324	4147	2290																4731	5330	6937	3656	4803	4524	6113	5340	6376	3862	4367
11.5	832	277							5985	7564	3633	5372	5571	4168	2349	4236	5296	5828	4485																5044	6157	6855	4401	5313	8205	4165	4957	4694	3333	4184
11.6	1060	596							5266	6568	4356	5343	5397	1848	2988	3282	3309	4998	4253																12367	6545	14302	4787	3206	3956	5672	5998	3838	3986	5661
11.7	658	965							2372	4087	4611	3064	4962	5719	3989	2707	5827	1981	3733																5530	7439	7407	3580	6427	4774	3889	4936	3931	4007	3180
11.8	550	1224							6848	2914	5775	4650	1547	3029	4603	5422	1695	5399	3562																7380	4738	5266	4690	3982	3792	4059	4870	5728	4171	4779
11.9	1622	460							5339	4976	4558	3525	5565	2686	4607	2870	3977	3187	5454																4455	7705	4784	3994	4655	3876	5018	4094	7741	4189	6518
12	961	1541							6174	5903	3940	4883	3008	6350	5012	3263	2788	4934	4400																13266	3887	4577	4729	3232	3642	4740	5087	5599	4132	4016
12.1	1444	556							5617	4386	6080	3047	3723	4694	3982	4372	2753	2817	5424																5301	5296	3260	4188	3476	6340	4519	5539	4074	3937	4259
12.2	1049	873							3150	5196	3931	2075	6081	3677	3517	3914	4356	5140	4800																6526	6300	4906	4527	4591	6070	3722	12139	4029	5308	3563
12.3	1157	766							1968	5623	5029	2977	4932	3369	2916	2187	3988	3598	5945																3924	6155	3786	6333	5959	3961	3635	3280	3233	3974	4421
12.4	986	1661							7512	3333	4055	4252	1896	5072	3437	4087	4045	3337	3620																5116	10686	4654	5239	3045	4981	7548	6029	4414	3589	2738
12.5	1761	477							7834	4332	5146	2711	4061	2781	4102	3424	4250	2647	3622																4566	5244	5464	3125	3833	3622	2272	5646	5371	3369	4353
12.6	1883	1422							4333	5652	2524	4640	7728	5563	4681	4480	5719	5005	3192																4595	5853	5194	4705	5673	5119	6734	4624	3447	4622	4600
12.7	1328	1742							2571	3331	3171	7567	5930	5915	4895	4702	4695	4140	5578																4916	5657	8979	3573	3421	4409	3424	5373	3609	3757	3705
12.8	958	1553							5497	6285	3768	5493	4651	4920	3693	2476	5340	5279	5110																5027	4792	5076	3954	3719	3939	6475	6278	4410	3594	4551
12.9	1108	1381							5647	3588	6414	5440	2482	5258	3814	2856	6692	4980	5504																4861	5460	5314	3975	4327	4544	5046	5087	3070	5821	4242
13	1297	562							2770	4772	6035	6055	2777	3706	4534	3761	4506	3958	4526																3563	6957	4940	4257	4465	2947	5031	4717	4729	3406	2880
13.1	602	753							6153	3931	3310	3860	4816	4947	2875	6097	3653	2110	2808																5244	5554	5499	2890	2155	3837	5353	5372	2963	3801	3547
13.2	1660	1812							4690	3550	4783	3220	6105	3024	2728	5317	3612	4360	2770																4372	10090	5228	4918	4664	3706	6805	4485	4397	5838	4852
13.3	869	675							5319	2161	5017	3435	6758	1690	2541	2737	3655	4355	3741																3689	5195	4395	4289	5228	4740	3966	6609	4653	4147	3657
13.4	1444	505							7317	2882	4325	4324	5175	1731	5197	5245	2416	2356	2953																5266	4856	3616	4950	5187	6245	3514	4349	4466	6139	4150
13.5	559	1323							7459	4422	2346	4927	2644	4559	2964	3509	3693	5480	6120																4363	13636	5168	3340	3411	4208	3379	4003	5793	4665	4728
13.6	1224	733							6278	3920	2578	6269	4866	4464	3020	3222	3847	3635	2868																3550	6988	4722	2291	6112	3441	5085	8003	5041	4055	5109
13.7	804	755							7455	2059	7968	1918	3105	4788	2606	7080	4785	3934	2695																11449	5123	3832	2958	6841	6555	3190	4831	4916	3293	5168
13.8	1305	761							5108	2890	5757	4032	3268	5681	3024	4150	3328	4134	2957																4128	4646	4185	4196	5657	6176	3098	4415	3763	5936	4452
13.9	891	1350							8849	3097	6412	6055	4932	5297	2865	4337	2071	2497	3788																3516	3400	4463	3707	3986	7541	6018	5185	2934	4059	4150
14	791	1010							6685	2511	4486	3916	2797	4947	3889	5378	6702	3232	3929																3896	5561	3668	4376	4981	3940	5545	3792	3928	7127	5403
14.1	1638	1346							6454	2489	4545	2539	4807	3846	5733	4667	2770	3014	2789																4385	3596	5370	5106	5429	3433	4652	4168	6505	4100	4243
14.2	2325	1176							4672	3709	4357	1764	1902	4033	6084	3723	4290	3294	4954																3280	5340	5247	3041	5981	4322	4419	5433	3875	5373	3782
14.3	827	965							3629	7871	3681	5319	4790	3170	4066	5333	4755	4261	5593																4278	4585	4215	3969	4906	3896	6757	4503	4288	4048	3682
14.4	801	1162							6035	3927	4390	2965	2576	3994	2075	5263	4503	3544	5802																5101	3967	4365	3940	4839	3967	5467	4055	4228	5168	6792
14.5	818	1371							4592	3409	4743	2249	2909	3143	4387	5404	4741	5478	2977																12293	4162	4026	3260	3097	4659	5328	4401	3714	3832	3183
14.6	947	1745							5269	2889	5130	5083	5024	4474	3604	7393	3197	4651	5806																5596	4190	4150	5926	5831	4965	4221	3964	4725	5458	4292
14.7	1162	739							3894	2989	5279	2377	2862	3900	4795	3373	3334	2626	3556																3382	4236	4266	6449	3280	4850	5116	3752	3382	6605	6094
14.8	1600	1303							6152	4779	6107	4588	3970	2961	4542	6731	6391	2183	3265																7154	4572	3666	5095	3106	3538	4030	4749	4818	5506	3881
14.9	1143	1663							5121	4517	3964	5033	2509	4316	3354	6480	3608	2350	2614																3868	6414	5186	4954	4805	4859	4380	3365	4669	5755	6265
15	1309	1482							3524	3853	4940	2463	4424	4548	4775	4401	2615	3698	4905																5744	4369	5923	4093	4530	4018	5798	5589	4430	4562	4236
15.1	1119	974							3379	1663	5035	3930	4995	5046	2648	6204	5343	3116	2864																12956	5138	4796	4602	4034	4171	3264	5259	7676	4794	4542
15.2	817	987							4295	3431	5397	3604	7302	4232	4519	2531	5044	4048	2821																7070	3718	4350	4904	3343	4860	9185	5148	6299	4011	6374
15.3	1100	975							5591	4755	3205	4807	3489	4757	4181	4334	4953	3371	6308																4441	11554	5081	4006	3534	3970	4656	6998	4939	5497	3145
15.4	1103	977							4529	5193	4461	5629	3310	4640	5676	2369	5514	4984	4838																7003	4753	4064	4514	5134	5830	4328	5409	6659	4720	4819
15.5	830	1154							3535	7301	3091	5664	3490	4413	4164	6575	2201	7052	4279																6458	4735	5155	5273	4313	4096	3291	5581	5082	2997	3535
15.6	657	1240							5404	5386	4559	4961	4945	5380	4988	2845	3282	7955	3172																3699	5675	4766	4019	4098	4856	7270	5713	3372	3276	3071
15.7	1110	2044							4404	5664	4585	1907	7718	2019	6436	4588	6467	5128	3713																3802	3606	6872	4229	3536	5850	5439	5753	4283	4280	4392
15.8	1521	1035							6498	2478	4282	2966	4743	5042	1698	4083	4802	3650	3494																5036	12040	5858	5469	3541	4855	3338	3333	4013	4398	2999
15.9	1547	843							4473	4276	3201	2963	5102	3984	7173	6931	4065	5988	5154																4773	4624	3756	4690	3803	4160	4949	4031	6137	4574	3872
16	1353	1425							2802	5973	2155	3825	4479	4935	3382	3800	2216	3283	4558																6413	5581	6471	6719	3424	4525	3522	4918	5164	4893	6887
16.1	572	1692							5788	7740	5563	2285	3348	3234	3325	2204	2550	2429	6173																4982	5020	5112	4789	4282	6854	5557	4589	5142	4192	3578
16.2	523	1595							3982	3559	3417	2783	3234	4133	6404	3322	2698	3584	4855																7148	3651	6922	4417	4767	5643	4381	6045	4133	5045	6328
16.3	185	671							3710	2288	5561	3637	6421	3771	5300	4289	5695	4359	3023																7434	5267	5226	5437	3152	5638	4756	5037	3804	4457	5287
16.4	1726	1767							5493	5784	4075	6988	4110	6194	5393	5917	5225	5062	3021																4997	4626	4659	5485	3225	4233	2835	5428	5458	5639	3911
16.5	865	1480							3249	5805	4196	4991	3855	4271	3738	6865	4247	2681	4986																4732	3894	5327	3882	3702	4414	3688	5916	3650	3724	8275
16.6	1286	1327							3044	4801	6069	6973	5685	3738	5226	4511	2862	3267	3752																6317	3569	3576	7764	4726	4401	4729	4288	5364	5354	4814
16.7	1223	929							2561	5727	4256	4770	2727	1915	2954	3957	4344	2420	2426																5145	4298	5314	4282	7692	3574	3442	3281	4033	5805	5202
16.8	1203	428							3445	7085	4878	4918	5305	4710	4439	4945	4000	3003	1870																4151	4498	7790	3976	5692	3830	5376	3501	2956	5007	5628
16.9	832	2127							2656	4213	4693	4933	2062	3381	5366	3433	4011	3528	3004																4369	4508	6305	2884	4936	4946	3841	2625	4624	5196	3252
17	584	1148							2798	2593	4754	5800	4125	3235	4499	3598	4914	5242	5165																7226	4744	5593	3127	4235	6811	4736	4429	2970	5655	3745
17.1	1389	1020							3904	4614	4036	4472	3541	4910	7519	2243	3334	2568	4333																8002	5765	7063	4941	6529	6587	5390	4036	6746	5099	3224
17.2	1036	613							3016	8172	2131	3645	2969	4027	4217	4731	3133	4719	4297																6365	3660	5444	5508	6621	4842	3911	3522	3997	5336	2791
17.3	868	1157							4484	2841	3605	6237	4751	4983	7280	7268	2187	1855	2423																5333	4845	4846	5200	8694	3833	4219	4053	4560	5060	6555
17.4	934	565							4057	4123	3610	2436	3066	4685	4762	3069	3565	3928	2945																6473	3313	4478	4226	5635	3809	5931	6027	3091	4248	3520
17.5	2533	528							4119	6392	2820	4885	4246	6369	4821	2319	5024	3968	5032																5737	5405	5219	2644	3703	2740	4527	4773	4478	4071	5978
17.6	1086	1435							5634	3534	3795	4088	4055	3901	2869	5320	3841	4125	2139																3787	5664	3936	4640	4990	5869	4470	3839	6232	4439	6351
17.7	1098	1180							5240	5086	3109	3267	1936	5878	6269	3231	6254	5517	2900																5042	3962	5028	4987	4702	4198	4510	3087	6772	5728	5541
17.8	727	1682							4699	3260	2466	3739	2906	4238	3005	5226	2694	3123	4750																7377	5085	3651	3409	7434	3164	4059	3097	4165	4667	3704
17.9		1078							5556	2601	4261	3669	3719	6225	2711	4758	4482	3248	3897																5244	4289	3734	3773	5186	4086	5464	3730	4365	4080	4211
18		415							5965	4460	2122	5573	4345	3982	3080	4307	2774	3133	3233																4715	4989	4665	4016	4092	3483	4716	3026	6534	3423	3050
18.1		1285							9009	3576	3232	4359	2140	1745	3445	5466	5202	3114	2782																6450	4824	5054	3460	6828	3907	3438	4118	3941	2634	11560
18.2		1146							2222	7866	3339	5812	6231	8106	6526	3338	3523	4494	4266																8273	5270	6067	4559	3963	4955	6245	5287	4039	4333	6400
18.3		591							4567	3193	4542	3325	5623	4185	1964	5132	4463	4581	4066																5402	6781	4033	4574	3993	5458	4525	4492	6891	3503	4383
18.4		1189							6157	4009	5124	3972	6328	5952	3315	2658	2380	5080	2700																4737	4720	4452	4210	4745	4103	3708	7366	8725	2974	3295
18.5		878							5588	3677	2326	5910	3879	7630	4405	3562	2023	3700	4697																4695	4912	8145	9446	5573	8493	3435	4645	4543	3838	4082
18.6		764							5898	5130	3610	2372	2084	3954	2279	2981	3018	5370	1887																4721	7361	4302	7084	3412	6140	4467	4088	4793	2963	3871
18.7		1706							7520	7285	3959	5781	2381	5246	3547	3989	2608	5001	2214																6409	4456	6583	6389	5704	8191	4824	6333	4103	5267	5493
18.8		929							4065	4918	4855	4972	4271	5128	7949	4183	3896	2477	3039																5036	5429	5639	3769	4372	4842	4146	5892	4606	4010	5361
18.9		1698							4648	2701	3126	4901	4780	3417	2896	3710	4253	4004	3105																6077	4570	4477	5513	4552	3685	3650	4717	4720	3128	4109
19		870							6724	4680	5879	6503	4434	7521	2348	5481	4599	7421	4618																3352	6058	3897	6991	4262	4529	3849	3168	9592	5851	4074
19.1		992							7773	2913	6740	2966	5379	4594	3666	2568	4794	3902	2244																9452	4259	3446	3547	4046	8155	4653	6048	6090	4440	5619
19.2		1420							4796	7158	5510	3023	5922	3720	3487	3440	3180	2310	3584																4666	4598	4686	3807	4523	6214	5937	4214	5201	5478	6141
19.3		825							7812	4575	4512	1885	4513	5791	3229	5063	6755	5268	1702																5879	3723	5511	5404	4487	4552	4091	3928	5756	4675	3472
19.4		1514							6019	6257	7656	3706	3073	4726	4847	1800	4733	4008	3450																6646	5975	3954	8121	4637	6580	4292	5401	5107	3529	4665
19.5		858							7537	6985	5006	3151	3324	3137	5521	4589	4762	4408	7158																4866	4607	5599	8528	4807	4622	3706	5999	8961	4053	4983
19.6		1540							4159	5006	4842	5116	7071	2096	3240	4028	6293	4894	3722																7400	5786	5062	4352	3391	7283	8296	4736	4396	4779	3495
19.7		1365							3672	7480	5380	7296	5572	2230	4827	5048	2390	2327	2806																4583	3165	4328	4897	4823	4850	5623	4527	5383	7749	2933
19.8		1654							6994	3437	5939	3265	4891	3254	2742	3686	3265	3686	4027																6049	4977	4231	3833	4659	4700	10929	4129	6675	4135	5053
19.9		1476							5222	3468	3567	5797	4101	5143	2420	4335	1818	3521	5711																6800	3897	4330	3870	5191	4037	4593	5730	4830	3351	3598
20		969							5448	5371	5024	4001	4378	4279	2423	3770	4670	4212	4780																5599	6322	5696	3176	4345	4082	6029	4850	6157	9070	3738
									7909	5171	4783	2407	5364	3631	4505	4632	2872	6248	1940																12487	8321	7987	6813	3313	3170	4655	4655	5114	5613	4838
									6748	2974	4248	3821	2980	5642	1757	8518	2171	3750	4346																4682	6085	5178	4925	5673	4230	6930	3965	4407	8622	3566
									5727	3692	4080	4395	3084	5057	7588	3432	3033	3524	4140																4830	3681	3445	3352	4582	3714	5854	3832	4712	5517	4095
									5858	9119	4625	5673	1955	3387	4604	5242	5694	1837	2098																5625	4763	5723	3950	3649	7243	6137	5090	5612	4785	5074
									6484	6226	5408	3700	2350	3863	4389	3417	4034	5465	2939																11909	6601	5009	3270	4258	5023	4397	5318	6251	3489	4785
									4820	3924	3684	3631	2317	4950	3983	3786	5380	3802	4742																8443	3632	12619	6654	4158	7195	8302	4039	5440	3330	5824
									3382	4781	5405	3335	3246	3724	2311	3470	3719	1920	3702																5737	7027	5745	5608	4990	5133	5546	3860	4731	4263	3875
									7297	3327	5356	5084	2170	4738	5145	3729	3699	5470	4164																3855	7122	6828	5403	5555	5189	4948	2665	3432	4824	4035
									6468	4665	2830	4862	5203	5773	1905	2902	4282	4822	3905																4843	4844	4463	3209	5293	3780	5111	8872	3862	4855	5777
									5450	5643	3091	2359	4127	2949	2124	3617	4247	5281	4779																5033	4518	4309	4620	4493	4383	6394	5149	7042	3687	4283
									7497	5846	4055	4902	1731	3186	3609	5605	4976	6427	4168																5496	5954	3918	8510	4426	3662	4276	6991	5332	4088	4994
									3945	4243	5210	2296	4812	3650	3256	3105	4102	2791	6417																5102	5902	4770	5951	4112	6679	3963	5450	3946	5216	5159
									2298	3508	4766	4350	5899	3950	5065	4415	4019	4552	5205																7571	7586	5894	3317	5601	3777	6437	4314	4686	3126	4873
									5953	6022	2672	4200	2011	3262	5543	4187	4372	2911	5072																4837	4379	5612	5027	3832	5497	5515	4684	4363	5216	3833
									6529	4252	5463	5097	3341	4048	5420	4361	2689	2931	4619																3384	7201	3627	6767	4380	7704	4154	5770	2907	5517	4415
									7186	3747	3713	3804	3403	6458	4676	4035	4773	3438	3583																5047	5570	3283	6171	3854	4199	3700	4845	5005	3975	2883
									5443	4174	5077	3223	2490	4753	2222	4669	2501	3758	4591																3754	3814	3839	4332	4081	5160	5025	4249	5485	3938	4823
									7929	2390	7413	3746	2671	2763	5202	2004	5579	2998	4598																4330	4424	4094	4046	5876	5158	6057	4578	5871	5881	3811
									4473	4114	3720	8110	2645	6344	4790	3788	4150	5229	3528																4808	4898	4376	6181	5170	3624	6031	3793	4450	4522	5266
									3838	4696	4373	2396	3960	2084	4290	3814	4597	2794	2339																4218	6676	3148	3711	7941	2927	4200	5623	4175	4287	5378
									2279	3529	6134	5518	8040	5482	3839	6072	3948	3862	3792																3784	3053	3827	4457	3809	3018	6577	5451	2576	2690	5330
									6796	3063	4158	3784	3630	2476	4367	3855	1834	4221	5509																9503	6900	6713	5291	4602	4962	5488	5217	2713	4764	3485
									5148	2923	5216	2411	3445	3510	2586	2695	4260	4541	3087																3981	6383	3402	3885	4408	5047	5669	3872	5397	4011	5618
									7896	4240	3282	3195	5265	3387	3626	3882	3086	1697	5476																4209	5307	11104	2796	4109	6328	5672	3022	4283	4240	4307
									4839	3016	3482	4210	1864	6684	4433	5035	4227	4023	2281																3915	10206	5144	3493	3878	3131	4415	6702	4605	3505	4835
									4627	2246	5178	5646	4190	6283	4684	5407	6690	4590	4240																4310	4547	5651	7046	4354	6954	4442	5716	3547	6020	4956
									5100	3572	3580	3482	4334	4742	3916	2367	2752	4288	4846																3605	4935	5177	3795	2999	5664	3309	5060	6389	4458	4818
									7941	2821	5401	5596	4339	2068	3364	3866	3806	4569	4729																3804	7959	5565	3726	3348	6135	4525	3128	5134	6284	3959
									5424	3229	2347	5531	3866	2688	3923	3813	3996	3986	4438																4573	4765	4324	5908	4954	4718	2342	5100	4946	4334	3033
									7652	2443	3555	6305	4458	3314	7018	3259	2900	3450	2742																5880	4745	4009	4481	4012	4507	3590	3696	6018	4578	5344
									5326	3407	4324	5170	2694	3221	4151	2589	6169	3946	5638																15717	6257	3721	3698	4259	5302	5852	4753	3874	3796	3670
									5095	4153	2781	3973	3073	2876	4390	3030	4329	4750	5530																5675	5684	5815	3511	5078	3299	4916	4675	4093	4504	3097
									5698	4115	2532	3019	4510	2671	4155	3493	2700	2098	3451																7432	8777	5754	5242	4034	5258	4078	3276	4765	6239	3363
									2834	4665	1456	4066	4318	6135	5289	4481	2428	4588	5308																7403	4848	3995	5888	3904	5536	3926	6299	4769	3886	3286
									5089	3261	5636	4819	4775	5937	4880	3271	3169	3954	5038																4510	4966	4452	7272	4060	6380	3470	4256	7692	4273	4153
									4946	4375	3376	3147	5327	4461	3024	5789	3622	4754	6211																4951	11316	6038	6578	5614	4407	3761	7047	4184	4028	4640
									4676	7752	3576	2632	3685	4205	3737	2940	3553	4056	4903																13659	7038	4119	4156	4047	3698	6258	5611	3469	4586	3979
									5746	3639	2957	3824	4319	3220	2648	4949	4283	3913	4269																6243	4129	3937	4257	5296	4427	4846	5002	4008	3360	4055
									5531	2176	3295	6375	4858	4983	4238	2561	2157	4181	1319																5804	6344	5566	5252	4140	3763	5851	4070	3359	4559	3494
									4439	3914	3715	4323	3549	4281	7827	4380	4384	3146	3730																5446	4876	5216	5485	3704	2909	5375	5766	5125	7017	6365
									4493	4630	3801	4940	3916	5053	3056	5123	1862	3096	4779																4753	2834	3334	4764	4091	4861	3470	5916	4249	2955	6301
									4794	4599	4722	4506	5380	4389	5661	2483	5150	3087	3614																3667	4787	4793	6712	3846	3694	3749	2843	5017	5479	6137
									4153	7829	4422	5097	3675	3758	4300	2916	3819	3699	3626																3474	4053	3577	5375	4397	6274	4563	4110	4281	5080	5253
									4617	3522	5287	4198	2389	7421	5503	2064	4056	6265	2865																3750	5449	5711	6248	3894	6253	6571	4142	4340	4134	3903
									4186	3200	3634	4533	4971	5199	4219	4462	2553	4419	3318																5071	5522	4453	5880	4290	4666	4632	4258	6129	4539	9476
									4777	2833	4644	4430	4230	5767	3889	3044	5819	3863	2021																3083	3274	4515	6351	3108	4324	4553	5574	5564	3392	5677
									4995	4366	4949	4676	2531	3681	3007	3966	3894	6477	4287																7003	3926	5820	4997	3515	4856	5738	5226	4948	4133	4524
									3994	3742	5852	3859	5276	4688	4437	5151	2428	2580	3793																5626	4639	5185	7018	3334	4703	5596	4183	3388	3948	4619
									4577	4522	5681	5084	3916	4749	3266	5550	2264	4364	5660																9007	4448	3540	5571	2857	6694	3384	4126	3006	2723	5106
									4852	3985	5383	4700	4409	4909	5459	2915	2275	4962	3529																7477	4610	5445	5082	5401	5094	4329	4221	5537	4193	2674
									4979	2346	4494	2586	3212	5103	2895	5497	3236	8152	5041																5761	8174	4082	8700	4584	6380	4301	4375	3372	3763	3228
									4514	8729	4135	4252	9553	3371	4427	3613	3225	3110	4874																5355	4045	4116	3535	6941	4648	4965	3680	3774	5304	5474
									4096	5623	4468	2244	7520	3896	3603	4089	4058	3388	4473																6347	5244	5377	4117	5540	4454	4371	2802	2989	5070	3502
									3104	4019	3232	4571	5442	4390	3416	5244	4613	2277	2187																4985	5714	10457	4563	5259	4263	5729	5568	6564	4923	3950
									5820	4987	2463	4403	4858	2297	6244	3308	6196	4798	3337																3599	12439	6170	5618	3645	3372	4239	6182	3768	3977	5623
									2427	6097	3375	5515	2790	2830	3291	3186	5155	4154	2794																6264	5672	4167	4673	7227	4292	4140	4393	5125	4559	6690
									3233	5507	5110	4091	3279	3132	3528	6613	4546	5156	4345																6260	6904	6605	3210	6070	4940	6931	5175	4820	5803	5000
									3092	4513	2538	6372	4374	7726	6428	4342	4837	5226	3583																5842	7351	4555	3528	11954	4156	4670	6067	3368	4382	3384
									4474	3880	2956	3474	5499	5907	9847	4874	6191	1401	6253																7137	4387	5716	4998	5237	4462	5200	5228	3243	5460	4506
									3407	4417	3556	5831	5569	5258	4981	6602	3585	3200	4850																4500	11430	5414	5286	5087	4472	3821	5511	6548	4320	8516
									3802	8147	6419	5250	5410	4928	3096	4222	7667	3853	4452																3645	4803	4558	3650	3435	4787	4015	3246	4579	4330	5328
									2742	4496	6205	3300	5710	3143	3970	3706	4773	3010	5885																5742	5310	4039	3717	4463	5969	4210	2626	5525	8019	3022
									4822	6906	2030	5116	4082	3249	5030	5413	3278	2594	4438																5685	6090	4858	2343	6349	4811	3276	3852	5015	5069	5857
									2373	4073	2805	2787	3603	5790	4223	5640	3569	4776	4833																7025	4495	7413	4837	6207	3652	3006	3942	5312	4649	2915
									4510	3786	4615	2399	2195	4918	5089	4189	2542	4909	3526																7254	6718	5183	7137	4661	3728	4154	4136	5093	4966	4535
									5464	4113	5557	3798	4129	4139	4446	3017	4799	4596	4572																3769	6255	4818	4542	4952	4901	6327	3570	6807	5362	4090
									5152	2611	6226	3865	3061	3811	3539	2396	3578	4903	6700																4798	3333	5574	3530	4803	4004	5407	6261	3942	3911	3194
									2302	4901	5919	1800	4412	2533	4243	4389	6127	4145	5131																5099	5209	5117	3262	3455	3531	4518	3432	2889	3729	3595
									6831	3510	3450	5292	4641	2583	3206	2674	4090	3863	4500																7281	4028	4381	3550	4872	6760	9157	4660	4515	4670	3829
									5324	5960	5232	6672	4218	5164	2520	5110	7175	3840	4713																5052	5226	5175	6345	4074	5299	4098	7509	10548	3773	3597
									5793	4840	3739	4949	6162	2646	2894	2658	5459	3946	4104																4797	5116	4995	2633	4491	6217	3280	5854	5083	4983	5253
									6189	3818	4088	4090	5395	2696	3617	4985	3144	4745	3835																4999	6462	5304	4994	3679	3508	4772	5775	4378	3889	2896
									4957	4876	5058	4201	5036	3528	2466	3797	3128	4673	6071																5567	4831	3826	3673	4791	2706	5500	5739	7258	4301	4717
									4930	3681	6655	3364	3112	4036	4815	3678	5930	2426	3756																5678	4283	3522	7472	5491	4149	5275	6552	5419	4814	7185
									5388	4795	4104	7296	3814	6273	4542	3915	4140	4973	4152																4980	3709	3663	3979	4063	6244	7262	5550	9743	9432	4060
									3144	6624	3621	3552	2349	3680	4929	2824	3686	5152	5180																6125	4669	4281	3335	4991	4359	4127	5142	7579	6531	5665
									4439	4838	5032	4627	6212	5927	4767	7210	3106	3643	2939																7674	5305	4027	4266	6757	6978	6075	4335	6279	5220	6074
									5832	3995	4237	2075	2409	3482	2677	3361	3226	2031	4970																9276	3754	4108	11865	3785	6298	4135	4093	5004	4418	3136
									5353	7216	4990	2588	4318	5661	5661	4694	4234	3487	3097																3965	3209	3236	5408	5022	10214	7986	5352	5799	3613	5603
									3240	5507	4680	4319	4862	5747	4230	3157	5572	4281	3390																6089	5333	3911	5756	4182	4278	4099	3332	4976	3493	3902
									3856	3837	4833	6591	1835	4556	6149	4658	2283	6725	1762																4926	3641	3943	5145	4974	3744	3649	4452	4708	4786	4927
									7113	7042	5147	5295	4005	3245	5710	2587	8060	3970	4513																3547	5117	3688	4001	4530	4988	3619	4318	4677	3157	4902
									6051	2313	4947	3255	4862	5596	3161	4348	6279	3624	4925																7393	5870	5183	7848	4244	5470	3729	4298	4426	4575	3819
									2574	5708	5051	3813	5334	4842	4175	4084	4147	4710	4876																3937	7195	6799	3701	3708	8106	3036	2943	3724	3636	3055
									9076	7146	2938	4068	5516	3617	3875	4813	1968	3777	3366																5722	4917	4316	3062	3930	3205	4146	4070	4259	5621	5668
									5372	3043	2689	6038	4082	5490	3013	3293	3624	3761	9057																7560	4337	4559	4713	3731	5374	4407	4300	4249	3207	4509
									5600	5446	4029	1922	4800	2028	3706	4644	3932	3751	3445																5220	4883	3428	5564	4239	3839	3933	4402	6329	4998	4097
									5078	7091	2109	4747	4999	4063	3515	3061	7207	5677	5409																9137	3656	4422	6514	4835	6036	7468	4370	5494	6087	5918
									2086	5056	4957	5821	5088	5227	4495	3776	6390	2976	3164																5597	5897	3776	4268	5779	4360	4419	4258	5156	3483	4882
									5312	3864	4516	1995	4292	3442	3287	4716	5908	3526	4151																5061	3650	3864	3607	5446	3519	10447	3322	4526	6796	2746
									5686	6649	6131	4818	3691	4487	2622	4250	3989	4869	2521																4685	4995	3769	4219	4238	4684	4565	6578	6416	4630	5253
									3681	4921	2556	5245	3965	6178	4297	3129	3921	2770	3112																15272	5067	3673	3283	6621	3406	4742	5416	5779	4847	3181
									5193	3799	3870	2852	4918	5385	3148	6280	4855	4287	4062																8943	5198	4879	3892	3800	3130	7071	4421	4315	4404	3559
									6030	4708	6321	3460	5182	2662	4465	3459	2606	3345	3056																6024	5412	4618	4880	7651	4148	5156	4475	4086	3778	5482
									5779	4869	3884	3243	4934	5184	4156	3727	4091	6806	2436																5789	4017	5714	4655	4076	4501	3940	8138	4112	4176	5733
									6427	4773	4973	3523	5391	4835	4024	4361	5000	5258	2194																5222	5516	4006	2991	3683	5330	4508	4211	3439	4522	5467
									8750	4884	5135	6177	4262	3033	4744	5191	4169	3092	4019																5707	5949	3276	6524	6639	4975	6894	4644	3546	8886	4132
									4399	5440	3528	1836	1751	5155	3606	3419	4885	6646	1808																5321	3300	3176	2694	5465	7457	4982	5052	5394	6043	5748
									9602	3906	4894	1987	3583	5498	4056	4545	2697	4006	3398																6069	4708	2438	5783	3417	5362	3171	4357	4484	5071	5318
									6537	4611	4026	2871	3624	2263	5134	4396	6297	3450	4513																5704	4922	3713	5429	3652	3408	3284	5231	5443	7925	4953
									6279	4681	3806	4772	3968	3551	5376	3373	2824	4791	5017																3729	5993	4932	4175	5270	5402	4981	5535	3866	4573	5688
									7447	5492	7436	4151	2727	2984	5491	4676	4468	3161	5176																4288	7934	8140	3712	4854	4828	3269	4994	5277	5258	3634
									2429	3846	6856	3212	3967	4456	3415	2315	4886	2606	4645																3690	4525	3948	4982	3028	3945	3939	3683	3894	3978	3514
									4908	4780	6160	2180	3153	5255	5674	3539	4043	3405	3765																4058	5519	3137	7437	5233	4966	4976	3421	4631	3454	3593
									8246	3144	3371	7482	3025	6278	5563	2785	5333	5580	4239																5601	4780	7730	4876	4000	3919	3547	4712	5697	4165	3509
									6526	4290	4929	6703	3752	4592	4210	4528	4157	3914	2455																7079	3932	5342	3444	4637	4732	3556	4383	5365	4167	3276
									5945	2294	2362	4016	5100	5112	7463	4325	2492	2726	4834																3693	5989	12667	6273	3809	6779	3586	4706	6066	4148	2223
									5551	2351	2208	4154	5358	5153	6002	5400	4097	4861	3895																3375	4328	6376	4984	2637	3960	3167	6275	4293	4420	4139
									4463	3184	3099	6644	6033	4250	6285	5636	4295	4204	2937																9630	4485	4550	5472	6439	3785	6395	5819	3862	5503	5839
									2188	2694	2658	3768	4769	5657	6788	4904	1920	5102	2740																3346	4582	4327	4287	5065	3718	7252	4499	5375	6215	6174
									3865	3544	2903	4373	6712	5440	2590	4493	3466	5105	6209																4229	6962	6735	4679	4965	3814	6028	4453	5332	5877	5611
									5570	3174	3541	1928	2360	4323	3448	5612	3752	3766	4716																4438	3540	4817	4019	4811	3821	4972	3592	5397	5198	4777
									7478	3054	7745	3669	5626	2699	6811	3769	5081	3176	3704																6054	4662	6172	3502	3890	3532	5517	4510	6099	3251	4479
									6480	2735	3910	3049	5837	1582	5431	4153	2864	3231	3263																3876	6609	7394	4216	4047	5990	4476	4741	5488	3619	3772
									4917	2081	5999	3875	3800	2521	4542	4884	4048	1812	5499																4644	6432	6736	7005	4402	2527	3595	4118	5270	4126	4551
									5484	2349	7329	2994	4921	3202	3122	5216	2484	4027	3013																6232	7163	3792	4950	3803	4813	4063	4003	4165	4965	2904
									2637	2587	4499	5670	4383	7031	6008	3299	4941	5199	3224																2841	4646	4279	4582	4523	7700	3966	4161	3947	3097	6529
									6324	6607	4747	6932	2880	3695	3102	3489	4942	5819	4572																12552	6322	3186	3866	4360	3224	5849	5222	3201	3534	4177
									7004	3190	5494	4468	5092	6357	2924	5025	4597	4540	6371																3112	7427	5299	3398	4552	6157	3707	3706	7165	3078	3897
									3182	3924	6034	5935	2710	4855	2195	4783	3620	3806	4255																5083	5490	3141	4266	3957	3829	6768	4683	6652	2407	3284
									7110	3415	3829	4394	6062	3393	2865	3434	2371	4021	4138																7020	4040	4356	6549	3033	4075	7026	3728	3988	6246	3415
									6851	4179	5195	5634	4872	2280	3657	4235	3158	5580	5332																3943	6913	6018	5629	4989	4294	3533	4783	4369	3674	3412
									6823	5522	5011	3099	3684	4268	3593	3891	4972	5499	4350																4128	3552	9193	3160	3232	3500	3742	4489	2495	4650	6429
									6519	4410	1987	3104	5714	3751	3520	3284	2882	2733	2487																10903	4014	4167	4811	4374	4824	4878	5377	5439	5491	4309
									6166	4083	3420	6123	2431	3117	3652	4969	2986	4105	2731																5229	4694	4234	4440	2658	7936	3678	5689	5556	3816	5706
									4579	1647	5243	3053	3154	3611	3156	2215	7052	3142	4635																5856	5769	6718	4992	1971	6224	6696	5287	4399	5154	4498
									5243	1817	4393	3552	4093	4935	3263	6136	3763	6934	5234																6299	6609	5062	4389	4436	4603	3559	4144	5486	3763	8352
									3893	3259	2830	1621	4770	4713	3018	6019	5690	4459	3584																6373	5718	7200	6881	4503	4588	5264	5491	2936	6748	5106
									4863	5614	3003	4129	3870	3897	6401	2988	3699	6091	4894																4181	4567	4288	6747	4741	6451	4379	7954	5114	4077	5272
									2716	4797	3608	4978	4889	2864	4639	5270	5243	5037	1879																3641	4246	3998	4638	5068	3658	4409	4676	3443	4594	5205
									5559	4864	2311	3853	5238	2225	3693	2946	4498	3893	6234																4723	12568	5616	6700	4520	5466	4126	4459	3427	3719	4637
									3696	3739	3419	6297	5466	2241	3009	5024	4162	4913	6084																5729	3249	4714	5531	3647	6196	6804	5051	5676	5157	3410
									3387	4908	3090	6963	3783	3463	3861	3713	3484	3001	4672																3002	4816	5168	4498	8932	4845	4603	4037	4883	4664	7505
									5921	4174	2903	5677	2009	4336	4427	4995	5835	4704	3688																4883	5591	3297	5697	5557	5345	6684	5766	4658	4984	3726
									4699	4628	2550	6060	4165	2189	4018	2044	3129	4938	3128																3775	4490	6508	5079	5381	5332	2383	4139	4064	6999	2695
									5841	4048	5373	2584	6147	3031	5016	2891	6373	3453	2843																5473	6300	4252	6498	5985	4989	4766	3986	5236	5196	4422
									4893	4614	5538	4684	2456	4616	4744	2196	2610	5498	5246																2351	4965	5737	4660	6915	4013	5239	4875	5437	5244	4940
									4347	4610	2456	1807	2270	3537	3606	4452	3681	4897	2091																4753	5395	4444	4302	10412	4994	3457	2998	5042	6135	4076
									4143	3530	3858	2858	2565	3194	2551	4327	4407	2665	3685																8740	8733	4232	6633	5173	6564	3896	4012	4664	3918	4093
									3011	4922	4031	1770	5907	5244	3119	4673	3843	2187	5138																5787	4264	5007	6142	5513	4602	3619	3283	4819	4162	9147
									2866	6102	6127	4011	3525	2613	4682	4352	2945	3604	1949																5782	5454	4305	6801	5655	3811	6092	3527	4183	3494	3779
									6050	2924	7305	3905	3700	1921	6189	3678	3265	5328	4247																4156	12429	3966	3522	7042	4619	6212	3844	3662	3540	4982
									4947	3434	6625	4962	5980	6869	6364	2545	4097	3244	3871																5575	7737	4061	5005	4407	4211	3451	5670	2491	6985	3952
									4138	3832	3958	5829	4881	3527	3595	4644	5060	3276	3786																5773	4370	6585	7082	4231	3343	6560	4963	3747	4513	5210
									4620	5974	3871	3638	3447	3066	3512	4907	4712	3582	9292																6180	5729	4852	5313	4266	4033	5093	3960	3656	4576	3733
									3650	3166	6685	5699	4764	3368	4447	3913	3726	2364	5319																9284	4975	4473	5524	4270	4144	4664	4472	4111	5621	7992
									4073	5280	3457	2232	3990	5455	3415	3527	3519	4813	2511																5671	3591	4478	3977	3136	4061	4322	4723	5680	6165	4014
									4217	5511	8439	5671	2728	3645	3650	3986	3819	4403	3568																5621	4359	5373	2823	3635	5364	4381	7025	5063	5786	4053
									5590	3709	4898	6209	6684	4158	3839	4269	3373	5011	2445																6698	4350	5533	5661	4761	3953	3590	2732	4749	3319	5220
									5979	3748	2663	7268	3745	4158	4932	3162	4037	4509	3713																5196	3588	8673	4552	5497	5217	4244	5762	4379	5968	3418
									4789	3390	5406	2146	4075	1513	4514	3093	5247	3426	5085																6838	3146	3930	7268	6455	3914	4569	5109	6038	6046	7084
									4966	3362	4632	2693	4467	4630	4127	4253	2267	4057	2283																6052	4815	4500	4622	3946	4414	5583	5257	3169	5113	5296
									1888	4006	3047	5425	2869	1899	3404	3926	5812	5086	5183																7226	5034	6537	3357	5254	3731	3768	3981	4079	3820	2732
									3644	3731	6143	4677	3423	4299	3168	5500	3898	4697	2105																4861	6744	5595	5203	7332	7623	3948	3561	5377	5223	4534
									3559	3189	6167	2552	3998	3800	3085	4039	5865	3513	2830																6618	3077	5617	6899	5285	5202	10762	5939	9008	3879	6712
									2496	2662	5969	2995	4992	4154	5704	6742	4472	3967	3663																3808	3648	3044	6013	5235	4725	3190	4702	4455	4342	2957
									3489	5040	5759	4883	5315	3458	5055	5881	4985	4568	5061																5836	4189	4549	4723	2976	3637	4327	4266	5365	4903	6461
									3784	5340	3124	2395	3780	5363	2369	2405	4305	2823	6183																7248	12848	7240	4405	5302	4565	4630	4565	5290	3418	5032
									3153	4461	3373	6409	5801	4310	2359	2755	2960	2266	5252																4561	3610	6005	3280	4654	4480	5615	2913	4766	4512	3897
									5068	3956	4221	6165	3168	5632	3838	2259	3044	3301	3898																4970	4505	4658	6295	6218	5461	5475	4253	11840	5481	5092
									3489	4400	5144	2092	2905	8279	3477	4365	2880	2834	2877																6567	5234	6736	4311	3088	5884	6249	2817	5992	4441	5566
									3520	1875	3889	3904	5605	1696	2190	5589	2777	3656	6608																3967	3189	3753	6542	4926	4632	3763	3059	5675	5799	4445
									3711	4112	6733	4406	4903	5561	4078	2944	3421	5449	3782																6114	14597	4117	3700	5313	4467	5015	3032	4481	4097	3687
									3939	3567	4136	2992	5246	6798	4394	5556	4640	5595	2737																6691	5483	4047	6616	6712	4882	5146	3295	6945	4182	5907
									3500	6856	4307	3314	2970	3372	4246	4423	3883	2780	2031																4800	4982	5668	3981	3181	3625	5137	5205	4059	3759	4815
									4670	4574	3905	5168	3134	4548	3541	4505	2040	3354	3712																5480	6545	3698	3430	4715	3389	4147	6841	3888	5460	6088
									5465	5022	4088	5615	2666	5984	3941	4056	3747	5137	2490																6164	4754	4382	4574	4645	5002	4688	5963	4728	5582	4538
									1825	5473	7369	6242	3052	5233	4884	3384	4572	3893	2677																10554	3439	4451	4454	4513	3456	3861	5796	3839	4996	5485
									4081	6058	2794	3978	3740	4816	5361	5597	4811	3703	6062																5566	3123	4643	3870	5756	3042	3346	4053	4824	3605	4787
									2562	5538	2623	2945	4223	4820	2964	1991	3495	3851	6846																5598	5686	5386	10842	5160	2971	5954	5762	8975	5201	2853
									1915	4003	8193	3845	3767	5388	6739	2898	5934	3337	3015																5452	6134	3193	6207	4361	5354	5025	5216	5287	5150	4095
									5755	7318	4749	3866	3126	2448	3969	5593	5575	4856	5078																4148	4202	4165	6566	4554	5484	3826	5659	6363	3925	5864
									4652	6471	4209	4990	3100	2677	5180	4200	9564	3069	5108																7770	4985	5481	5290	4270	4374	3483	3484	4869	3172	5628
									5883	6494	7886	3799	5193	3752	4557	5513	4450	5090	5538																4247	4708	5903	3773	4663	6748	3128	5854	4942	3357	4348
									8607	2806	3603	2245	4675	5436	7715	6597	3635	2397	3356																5428	4840	4473	6788	5834	5759	5557	4108	5345	4378	3192
									3007	4929	3281	3372	4021	4233	3824	4421	2213	3148	3823																7205	3859	6321	3083	4418	8305	2237	4776	4014	6113	3899
									3799	5600	2915	4479	5051	5649	3667	5568	3344	1980	4921																5916	4664	6401	4466	5203	5648	4767	4768	5633	4144	5154
									4652	7471	3100	5173	4550	5969	3175	5060	3679	4452	3261																10343	5554	3089	6079	4245	4540	7200	4422	4396	4940	4401
									6837	3133	3780	3980	4050	3069	5604	4313	3908	3311	4907																4495	3540	4844	8801	3806	6765	7401	3979	4557	4561	5169
									5191	6257	4732	4025	3827	6171	3775	4422	5451	3677	4035																5950	4236	2898	5341	3896	5916	10618	4533	3364	4081	3744
									5457	4084	2841	4840	2509	4027	4679	3964	4792	2316	3147																4935	4700	4425	4183	6195	6224	4853	4448	4683	4257	4248
									5959	4015	3932	5539	3904	4952	2839	1955	5249	3548	3713																13912	4389	3744	5342	2959	5694	3791	3977	3625	3357	4017
									5918	4515	3038	2748	3957	4630	2604	3585	3434	4418	3901																10023	6302	4420	3183	2753	4568	8876	5261	3413	5280	5041
									8173	4090	5063	4451	2107	4068	5494	3832	6555	4998	4533																6639	5307	5963	5793	4775	7288	5327	5037	3702	3642	3742
									6430	3918	7161	3076	7340	3349	4297	3169	2849	5179	4920																5737	5970	7314	5422	5003	5282	6486	4724	5826	5624	2570
									4543	6486	2213	2058	5643	4640	5275	4666	5186	4623	2259																5560	5492	4461	4322	4213	3374	4296	6627	3663	3490	3752
									5736	3857	3426	3248	2737	3467	3307	2952	3896	3430	5412																5842	5403	6295	3063	5023	4223	7486	3931	4225	6099	5843
									8129	5810	4672	5026	3582	2683	5042	4399	3431	6830	3409																4734	4073	5195	5091	4299	4598	4980	4616	4706	5064	7148
									7308	4880	6713	3574	2019	2693	4416	3050	3506	4597	2650																5789	4291	3847	5021	3417	3661	3033	10184	4019	5635	5568
									5063	3329	6726	4755	4346	3900	3120	2172	6132	4315	2182																5301	6215	4527	4636	7234	4145	4605	5002	3927	3594	4164
									4499	2930	3523	4222	7347	3323	3740	2634	3164	3704	3986																4941	3369	5829	6403	4198	4178	3376	3717	4251	5616	4013
									4817	2639	5389	4128	2717	4766	2473	6476	6700	4115	4200																3461	5587	4420	5584	6213	8211	4930	5334	4310	8510	5427
									4922	4131	5749	6559	3308	2769	4631	2213	4748	2274	5065																3799	3481	3629	8750	4127	4085	3693	4905	3308	5061	5847
									5689	3857	3807	6009	2158	2398	5632	2679	3192	2811	4391																3910	4655	4504	4715	3850	6940	4583	5141	3650	3496	6913
									4889	3802	5181	4200	3778	2574	2543	5164	2961	3848	4805																3832	5355	4681	3201	5396	4572	3284	5199	5831	9203	6731
									6978	3364	4408	3938	6055	3082	4150	5608	3470	3074	2916																4994	4386	3444	6546	3824	4401	3137	4035	4524	4646	4337
									3518	3354	5455	4227	4344	3395	4428	5049	4592	4065	3752																3310	8432	4243	5788	4826	3608	3879	5247	7121	6007	3379
									7145	5188	4466	7027	4317	3789	3446	3605	4177	4113	5612																4120	3258	5029	4535	4764	4343	5205	3622	4828	4637	6253
									11518	2658	3868	3235	4189	3688	6732	5451	3695	4762	3404																6669	4454	4086	3564	3995	4152	4505	4990	4245	4069	6116
									6104	2555	3827	5286	5055	4478	2132	2046	2707	4443	2283																3766	3318	2760	5656	3527	4711	3916	5631	3635	4177	4232
									5795	2451	5339	5668	2328	5999	3493	4252	2821	4197	4187																4246	6331	4088	4247	3654	3919	4636	4192	3484	5024	3807
									8203	2538	4131	4700	2928	3005	3921	4664	4456	3121	4888																5116	6204	3694	6061	4423	5380	7207	5318	5123	3802	4190
									3994	4549	4243	4497	4290	4831	3416	5981	3170	1758	2452																3145	4351	6200	4827	4547	5438	5926	5205	4176	6847	4380
									7206	2002	3254	4960	3381	3018	4622	3258	5552	4931	4375																3955	4217	4529	3230	6776	5552	3532	4121	5080	3545	4968
									4678	4294	2346	6644	4990	2494	4424	4182	2393	3054	7542																5921	6361	5231	3852	5669	3164	5711	4414	3367	4168	4838
									5767	10475	4780	4555	3433	2811	3536	4638	3234	6364	5110																3432	4616	5546	4694	3492	4190	3388	4138	5873	4246	5127
									4227	3013	3162	4777	2807	5321	2974	4055	6188	5249	5032																3926	3906	3406	4978	4084	4068	5710	5062	3981	5558	3105
									5758	2306	2441	2645	5755	2671	2460	3438	4929	4938	4750																14569	5812	9697	5517	3014	3357	6333	4453	6055	3409	5690
									4200	3384	3224	5199	3379	3435	3358	3524	6338	6423	4126																5628	3027	5873	4465	5791	7270	5309	4321	3594	4200	4664
									1766	6497	4803	3625	2687	6522	2842	3869	3083	5962	2421																4025	4837	4564	4004	4555	5112	3797	6815	3537	5639	8538
									4774	7304	6517	2824	2997	5939	5260	5321	3027	2975	2719																5592	7205	5206	3665	6186	7456	4211	4420	4708	5165	4666
									3779	5421	5614	5053	4330	4914	7108	5895	2798	4874	2501																4527	5369	8339	6035	3120	6052	3898	3913	4976	3835	4975
									7108	2566	3899	4661	4595	3409	5755	5361	3443	5253	5931																5680	5055	4505	4873	10743	4325	4602	5031	2945	4349	4996
									5143	4341	3355	6767	3527	9323	5189	5838	2348	3977	3643																10339	5182	5282	5503	4737	5126	4068	2921	4330	3655	5311
									2352	4691	4573	5392	5240	6291	3593	3439	3455	3232	4125																6018	4843	7083	4945	4895	4074	5934	4090	4274	6133	3969
									6795	5756	4548	3880	3303	5569	2943	4057	3181	3871	3317																5128	4180	5883	4596	3547	3890	4035	3587	4863	3765	5903
									3071	4383	5752	6143	3986	4071	5711	5508	7130	2936	4875																6202	3782	2965	5330	6739	5857	5969	4131	4574	4133	4144
									5014	4034	6114	6219	4043	6002	6990	4419	3371	3804	4209																6642	8444	3730	5182	6891	3956	4034	7062	4800	3844	3968
									4433	5446	4570	4744	4010	3162	3537	2550	2985	2432	5299																4888	4724	5448	6016	11065	9650	8264	4391	5401	4220	5543
									4675	3612	5825	6436	6037	4683	3868	2718	4157	2308	3554																3125	5951	2769	4256	4487	4977	5690	3994	4440	3701	2995
									4334	3854	5006	4059	4555	2916	2456	3751	4685	2591	3136																4699	6245	4050	4573	3617	5053	5836	4049	5650	4807	3141
									5417	3873	3784	7247	4121	6038	5728	3253	4115	4139	6070																3263	5907	6930	7352	5275	4369	3667	5013	4342	5510	3768
									4941	4464	5006	4064	4796	3731	3694	4066	4149	4731	2773																6114	3379	8492	3413	6940	4972	3016	3845	3979	3795	8674
									6222	3948	7637	2906	4223	4595	4174	4654	5176	3806	3098																7847	5670	4955	5242	5409	3378	4469	4116	3165	4552	4323
									5603	4185	4604	3148	8184	2566	1943	2843	3478	5109	2949																6013	4190	4793	5763	3904	5083	3872	5208	5350	4118	4332
									5568	4410	7195	3717	1769	6633	3027	4035	5649	6890	4076																4999	4750	4897	4810	5546	6353	5377	4387	3389	3075	4889
									4552	3077	3636	2657	2090	8395	4142	3488	4144	3320	3028																6693	7483	4249	3988	4021	3736	5928	6628	3006	4020	4658
									4316	5073	2315	1991	4391	7068	6306	4942	6364	2592	3652																4527	5053	3733	3654	3150	6271	3228	4316	3414	4910	5508
									5885	5688	4586	4129	5111	5970	3136	4119	4989	4971	5622																4654	5808	4298	6365	5251	5731	5058	4990	2677	5621	3065
									2697	3947	4900	4427	3791	3504	2673	5092	3797	2773	4259																4309	4687	3170	5425	3970	3670	3909	3878	6137	5217	4261
									4178	7927	5114	5697	4806	2331	4893	5479	4634	3619	4936																5392	10934	5095	3186	4361	5140	6367	4887	4098	4304	3165
									3558	4627	5122	4277	4864	3085	4108	3978	4870	2225	5130																5330	4220	4454	2725	3527	6228	4266	4025	7612	3416	2677
									4559	4792	5019	3761	3973	2395	2295	4584	3808	5048	5573																4766	5350	3778	6411	3614	5027	4403	3979	6119	3497	4923
									7296	5586	3941	4303	3727	8086	5498	4140	4181	3234	4148																5608	5875	3243	5671	8469	5041	5818	3424	3753	3659	4640
									3094	4385	4670	6290	2631	5315	2966	5685	5385	4312	4191																4269	3929	5574	4724	7099	4432	4186	3881	6576	3653	4198
									3741	4558	3966	5118	3444	4285	4097	5978	3501	4522	3184																3010	4761	3574	5416	4972	3366	4046	6223	6711	3756	4283
									4382	4689	5194	2627	5623	6602	3873	8719	2898	5924	3891																2961	6287	4505	3619	4686	2900	6121	4349	3167	4431	5102
									3642	4597	3599	3158	5436	4558	6703	3520	6332	4364	3096																3096	5911	4947	5100	5689	4731	3904	4018	3903	5826	4923
									3763	2577	3271	2537	2919	4420	3685	2695	3320	5642	2258																5542	5958	4571	5513	4403	5053	4121	4467	5843	3573	5565
									2820	2789	6546	3099	5072	4180	4104	5338	5211	3858	3376																7777	4476	4871	5922	3980	5029	10345	3820	10242	3856	6053
									4773	7080	4992	4511	3489	4470	5030	6326	4079	2843	4357																7425	12151	5327	4172	4361	5545	3277	5794	5269	2486	3465
									4762	3627	6805	7300	4668	5710	4728	5417	6963	4530	3383																4600	6305	5957	5715	4473	4518	3356	2857	5156	6034	7851
									3514	4393	5565	6222	3992	4230	4235	4444	4429	5928	4366																6131	3809	3637	4963	4141	4061	6766	4474	6292	5084	3529
									3348	3407	6405	5707	3285	3382	4009	3010	3917	3121	3106																7329	5350	4416	5406	4920	4047	5699	4416	2998	4509	4701
									3030	3990	3574	1989	6890	4222	4286	2302	3264	4083	5336																6025	4292	4134	3136	4813	4405	6005	4645	9753	3358	4973
									4386	3866	3518	2181	3219	4429	4643	4061	3492	5081	6003																6329	4854	4787	7833	7353	5869	5446	3258	3392	4441	4122
									4877	4885	2307	4484	5022	4814	3953	3934	7337	3671	3774																5573	3942	3605	3050	3884	5220	4921	3683	4372	4736	4546
									4469	5818	3225	5044	3378	2666	3437	5003	4607	5358	3100																6075	5168	4361	6183	7059	3799	4354	5198	6657	6342	6460
									4028	5034	2987	2205	3411	3639	5108	3766	6496	2824	3671																6287	4317	5836	3427	5171	5028	5087	5542	4194	4671	4698
									5314	2812	4712	4752	4065	4359	6195	3609	2646	3270	3368																4275	5287	8954	3568	3516	4274	6076	7047	2920	5117	2773
									4870	3537	4095	4729	5687	1568	8215	4051	3873	2089	2961																2591	3473	5760	4916	4711	5468	3324	3898	5117	4814	5238
									3760	5253	3708	5574	6193	2860	4629	3358	3872	5011	5229																5496	4606	4908	5726	5244	6413	5177	4385	5200	3209	5333
									2333	3546	7173	4040	2975	3925	3547	5842	3528	4329	2460																6806	4661	6195	3233	7097	4511	4121	4040	3177	4830	5881
									4657	4575	3618	4458	3101	5669	4575	3396	3494	3265	4971																7729	4723	5072	3543	5568	5466	4379	4113	4785	4449	4184
									3981	3402	3279	3957	6217	4429	3674	4396	6971	4166	4607																6669	9705	3725	3981	3202	4213	4166	4307	5930	4275	6499
									3769	4938	5257	5384	4404	6154	5158	3965	3543	3855	5344																6270	3307	4705	4792	4007	4490	4691	4686	3590	5026	3710
									3566	4644	1524	2912	4679	1687	4729	4071	2033	4212	3047																4822	6145	6978	3856	4173	3870	3776	3636	7077	7677	4339
									4891	5844	2795	4795	2330	5017	5170	5198	3869	4544	2461																3945	6355	6157	9123	4402	4092	5751	5038	4963	4574	5155
									4671	6276	5744	2492	4242	3410	5407	5294	6958	4092	3768																5153	4903	7589	5237	4168	5981	5174	2925	5505	4913	2976
									2774	4078	3061	3190	3470	2178	1647	4886	5255	4869	1960																5521	10505	6947	6265	4704	4912	7877	4485	4030	4012	4914
									3472	3426	3932	2687	4345	5572	2014	4426	2453	4083	3800																5895	6771	4120	5310	4554	3972	5636	6097	4029	3883	3296
									2972	4901	4799	3080	3885	5715	2108	4599	5101	3150	3426																5658	8258	3546	7264	3524	3110	3462	7832	5055	5258	3683
									2849	5053	4573	2536	4455	6585	4639	5541	4303	3882	5476																7243	8841	5017	3988	5876	4858	3448	7011	3830	6451	4490
									1469	5532	4579	4840	5293	5449	3101	2200	4240	4100	6269																4785	3872	4282	6324	5873	4866	3325	5626	3946	3366	3490
									1448	3673	5994	5735	4638	2713	4112	4447	4738	4589	3992																6382	6279	5395	6983	3875	3330	5081	5270	4122	2789	4409
									6635	2194	4045	4798	2242	5705	4318	3203	3775	3651	3896																4994	3277	3297	4801	6594	3980	4165	4394	4295	5715	5371
									5526	5407	4888	3328	4036	3710	3025	4085	2572	4864	2519																4958	4951	4044	4710	5755	5975	3134	3534	4813	4982	7982
									3818	3967	6015	4420	3993	3907	2776	4204	3207	3281	1999																5240	4139	5052	4282	4078	5558	4111	3169	3241	4332	5857
									5555	6760	4877	4198	4962	4105	5727	1860	5878	2147	5756																10744	4487	3377	5229	5025	3919	6680	7006	5148	4963	5032
									1721	5900	3180	4174	4717	7155	4773	3286	2736	4398	1860																4850	4083	5643	5198	5187	7761	5532	3661	4345	5666	7840
									3979	6950	3264	5006	3497	5667	5253	2690	2207	5322	3999																6599	4030	5237	2883	2920	6677	11945	3495	5450	4245	4392
									2606	5476	3572	6767	2986	3514	4764	7171	2594	5078	2577																4614	2994	6499	2705	4312	9103	5615	3823	4113	3704	5179
									6881	3436	2422	4359	2786	3989	3906	4519	5590	4200	5506																4676	4799	6579	7698	6766	5840	6110	4256	5521	5331	5655
									6089	5064	3363	2648	4751	3841	3127	1937	4726	2072	4882																5499	4429	6396	3577	4236	4516	5799	6197	5460	4953	4254
									6205	4180	1849	4248	1626	3164	2999	5794	2897	2682	3941																5623	3830	5593	5935	5198	4318	7151	4993	3584	3059	4076
									4746	4556	2278	6460	3533	4321	3786	6125	3748	3732	3351																4802	3605	4666	5740	5806	6797	3401	4481	3716	3364	3966
									4959	4528	2475	4670	3159	3991	4117	4633	5511	4204	5963																5097	2775	3060	4217	4331	5991	6310	4087	4037	3168	3989
									7029	5086	5847	5204	4286	3921	5888	4510	4481	3146	3780																7890	6836	3323	7494	3807	4558	5614	3148	5388	3294	5636
									6471	4211	3603	6281	4282	4811	6798	2829	6145	4515	3380																9686	5939	5619	5948	3813	4651	4556	4205	7107	7085	6121
									5016	6443	3868	4022	4049	6135	4584	3509	7612	4037	2808																4790	5582	4463	5838	3718	4799	4040	4337	4280	4485	5102
									6987	4601	4200	3734	4113	3716	5014	2598	3633	2670	3902																7356	5978	3377	3506	4302	5227	5172	6053	3575	5197	4724
									5687	5470	6481	2556	6053	3560	2883	2721	3009	7028	3046																3932	5485	4351	4100	5558	3450	6454	3667	4798	5577	6185
									6343	2462	6447	7098	3001	6728	2595	2482	3985	2634	2483																10499	4006	4643	4841	4733	3510	3397	3734	3305	3516	3445
									5140	2621	5306	2278	4936	3545	4392	3132	2715	2475	2698																8266	3840	5512	3321	4612	5629	4097	8737	5247	6750	3628
									5519	2823	4756	3229	3305	6402	7516	2564	2102	3154	4332																6647	4387	4612	5577	4199	4110	3245	4951	4081	4037	3921
									4735	2877	6669	5617	4548	4142	2521	5147	3202	5496	2746																4880	4156	5923	3508	4945	5144	5906	4055	2990	7368	4754
									5264	4107	3722	1935	3817	4391	3041	5684	2350	5044	3881																4054	3869	5397	4776	7064	5195	5611	3688	5611	4822	4978
									5672	3688	3933	5451	3931	3652	4310	3156	4463	4480	4872																5016	5506	3732	3647	3655	6675	5183	5560	4360	4656	4173
									7372	3282	5927	5178	6351	6256	3656	4250	4832	5751	4107																4552	5295	3797	4414	4966	5408	5274	4678	5060	9569	6404
									5880	2884	6812	3737	3756	4465	2224	2685	4678	3910	3751																5448	5522	3029	6494	3679	4968	6183	5468	3966	5978	5947
									5032	3826	5770	5139	4129	3541	4188	4068	4581	3633	4500																4672	5406	3062	3739	3313	4597	4674	4696	3223	5441	9421
									6146	2552	3494	4721	2089	3171	2274	3729	8124	4721	5817																5182	2966	5326	3394	3631	4354	5760	6114	4368	4647	6470
									6292	2704	2334	3932	3615	2814	4146	5342	4133	3925	3157																5071	5268	4442	7184	3784	4548	3413	4271	3117	4230	4544
									2992	3627	4904	3725	4900	10558	4482	4625	3174	3387	4352																3931	4815	4804	6094	2895	3054	5050	4614	4492	4869	4372
									5237	5770	7685	5981	4635	4799	5064	3945	2978	3889	4021																4697	6353	5006	4227	4661	5788	4790	3380	5514	4180	3888
									7684	3635	5036	7845	5406	4210	2294	6545	3824	3865	4496																3824	6154	3941	6431	4479	4197	6202	5923	5035	4185	4817
									6996	3006	7381	4582	4329	8320	1352	4391	2381	4109	4173																5043	5005	4790	5092	3624	4846	4647	5352	3516	4515	4115
									4238	2405	2512	3831	5313	5576	5151	4219	3331	3138	2692																3616	3879	7079	4111	10038	3236	4043	4994	3923	4560	3981
									5382	5028	2204	4575	4869	4196	4501	2595	10213	4492	4624																4383	5927	5906	5730	7247	3930	5420	5217	4874	5819	4691
									2990	5611	5299	4315	4414	4638	4249	6749	4862	4032	8202																3272	4213	2938	3836	5610	5288	4973	4137	5274	5710	3937
									7016	3455	8344	2784	4265	4001	4089	5329	6865	3147	5638																3410	3749	4701	4818	3388	3623	4122	4619	4265	4566	2898
									3053	2290	3483	2905	2135	3610	2824	4280	4375	3255	4038																5439	4968	3994	6458	9572	4577	4863	5440	7296	3146	3008
									7648	3086	3428	7781	2287	5055	2244	2809	4484	2473	3617																3233	5562	6462	6209	6457	6581	3721	4363	4720	7205	7622
									6219	6563	5222	4658	2263	4211	6156	3779	3995	4744	2872																3479	5065	5373	3960	4992	3988	4418	5210	3004	4137	3862
									4930	4754	4478	3759	4202	4641	3683	3566	5086	2530	3613																5507	5435	4289	5814	5520	4948	3960	6214	4655	3709	5656
									4145	4473	4289	3095	4418	2387	4748	3314	3673	4643	2348																4814	4886	9024	4393	4748	4485	6771	3591	4821	3831	4281
									5015	3829	6323	4789	2429	3084	5848	2517	5474	3179	5297																4143	4403	3968	5518	4869	3889	4985	4803	3556	3462	3666
									4557	6482	4328	4723	2556	3139	5242	4790	4330	4147	3336																8796	5538	3977	3911	6652	4549	6044	3845	4997	5036	4874
									5510	2445	4249	5747	5096	3814	4847	3601	5182	2791	4851																5117	5069	4727	3817	4758	4447	4590	3675	5196	4444	4326
									6432	5356	7753	2681	3363	2487	3807	4866	7543	3613	3836																4454	5212	10456	6259	4909	2735	4510	4488	5467	4429	7074
									10474	4881	3144	3173	5112	5773	4444	3814	4225	3730	7775																6860	4429	6292	4343	4319	4467	4149	6599	3593	4591	2851
									5064	2466	5775	3831	5255	4199	3532	2446	4223	5968	5432																4457	3728	5258	4828	2906	4442	5083	5874	5528	5820	5167
									7591	6031	5585	3432	3625	1554	5270	3802	4231	3603	2760																6327	3984	6125	3731	5886	5573	4283	4593	7921	6553	3309
									3379	3545	4066	4170	5039	4328	3893	3186	2225	4329	3733																13038	4602	5225	3919	3889	5310	3613	7411	4958	6266	3966
									6973	4290	3730	3936	4367	6288	7671	5003	3820	3419	5046																6030	2769	5173	5292	3368	4071	5537	4665	3932	4407	5038
									4280	6198	3787	4954	2527	5572	6224	5361	2775	6011	3593																5622	8863	7587	6346	3992	4497	3197	5675	5335	3355	3928
									4392	4493	1985	4991	3600	5147	2181	5286	3215	4361	3759																4531	4918	3055	7609	8662	3231	5245	4797	4515	4642	4824
									1788	5501	2261	5037	3804	1714	4339	4671	2941	6513	2367																6486	6911	3433	4242	6970	4153	4705	2556	4861	3234	3969
									5501	3107	3081	3770	1898	4140	6101	3497	4498	3503	2954																6191	4356	3716	5289	4119	4751	5023	3703	5737	4083	6721
									3521	5848	3328	6263	7004	3705	5740	4734	3491	2774	3554																5443	5139	4556	3394	4279	5684	3455	5462	6245	5589	5188
									4979	4916	3045	3655	5309	3872	3614	4604	2151	3968	5917																3204	6985	7127	5499	6331	4429	3971	4463	3226	7117	6603
									5067	4638	3258	4021	2450	2099	3443	5075	4633	4151	2759																4586	4713	11260	3349	4134	5509	3248	3339	5022	4214	4611
									4166	4280	9982	2310	4462	3139	2775	4335	4686	4369	5891																3871	6299	4802	7631	4089	3747	6277	4143	4977	3135	4268
									3696	2204	5362	3552	6906	3837	5085	1563	4373	2770	4777																6646	3579	3787	5009	4021	4017	3609	4107	8425	2886	4309
									4766	3066	4412	5697	3546	3721	5368	5799	3336	2524	5402																5319	4511	4108	3216	3652	6349	3803	2579	4506	3614	4940
									4453	6001	3667	4874	3325	5209	4467	1917	6084	4831	3843																6734	5660	3312	3983	5131	4835	11635	3196	4906	4829	4728
									4261	3520	4667	3642	2546	5745	4502	2764	2746	2465	4257																6122	8360	4413	3464	4800	5375	5498	3802	4686	4061	5300
									5699	3258	3926	4361	3763	5728	4724	3645	2007	6658	2661																6684	5162	3363	5005	5681	6165	3433	5283	6502	4755	4363
									5172	5247	3494	4795	4054	2035	2707	3678	2273	4737	6478																4710	7363	4856	4739	5838	3414	5807	5078	3294	3865	5577
									5996	5085	2143	4051	7767	1573	2116	4738	3707	2056	2358																3932	5252	4402	4904	4513	4194	5277	4433	3729	4337	5080
									6546	4025	2091	2035	4824	2755	3355	5392	3200	2124	2588																2830	2989	4378	4561	5914	4670	6079	5473	5285	5472	4701
									3698	4106	4410	3858	6295	4825	3177	4075	3185	4062	3703																5967	5311	4140	4883	5873	3856	4597	4961	6899	4304	4735
									4415	3538	3335	5984	3175	4456	4427	5447	5611	2913	3972																5734	8743	3661	4265	4855	5592	4697	3523	3804	4417	4040
									3873	4975	4738	7308	3731	4193	2696	4986	2964	3646	4648																4253	6706	4126	4249	5227	6599	5219	4030	6126	4490	4934
									3208	7056	3299	3079	4626	2737	3112	5859	4570	5128	4110																4597	6863	5897	4827	6170	5837	7257	4854	5592	4246	5721
									2359	6188	3592	3959	6732	4085	6774	4364	5422	3455	2286																5855	4158	4596	4431	5011	5626	4947	3967	5299	5420	5211
									5867	7156	6063	1415	4744	6068	3551	8080	4169	3523	5366																4364	12935	4741	4377	6360	4031	3924	3912	3940	4518	4682
									2919	3184	4869	4598	4309	3366	6026	4086	5767	4095	4042																3966	7116	3806	9270	5034	5966	3958	3125	6284	4453	5445
									2707	2915	3113	1914	6176	2506	4094	2132	4198	3515	3919																3365	4784	4216	6002	4767	5669	5078	5658	6733	3543	5024
									3882	3646	2472	3254	3074	3928	3917	4998	6484	2340	3215																3642	5916	4600	4851	3361	5573	4702	5481	5259	4016	5988
									6138	3153	3434	3583	5751	4828	2927	4788	5148	1869	4474																5070	4885	5367	3819	4391	4377	4077	5460	3988	6687	4232
									4373	3899	6775	3424	4369	3519	2640	3838	3238	5174	3973																4256	4020	4834	5574	6094	4002	5497	3077	4676	3267	5131
									2271	2707	6348	3209	4743	4952	6530	7883	3544	3590	2613																5326	5718	4536	3687	5996	3940	4587	4162	2794	4536	4956
									2751	4392	5063	3746	5187	3192	6825	2838	4399	4333	2355																8916	5664	3390	6175	3890	5188	3370	3929	4537	3894	6286
									5555	5411	2998	4953	5946	3959	6350	3234	4182	3917	3955																6745	4649	4703	8654	4682	6524	5275	4286	4263	5124	5261
									3282	2891	3824	3347	3339	4661	7131	2424	3199	4031	4558																3215	5827	3527	5219	4812	5164	8272	3783	4355	4779	3619
									4540	4101	4742	3687	4091	3908	5743	1746	5535	5280	5560																6091	5843	6072	4432	3535	5182	6074	3599	4674	5686	4453
									4581	3894	2863	6280	5438	4957	2928	2965	4490	4069	4229																6609	4803	6776	5875	6382	3730	3478	3661	3208	5126	4736
									3105	4588	6385	4174	4934	4089	2335	5378	2160	4644	1682																6540	5043	3853	4719	5676	5148	4011	4059	5786	4627	4285
									3604	4185	2923	4325	2757	4178	4373	3685	4605	4364	4490																7230	4887	5944	6388	4313	3701	6225	3925	4629	3602	5045
									6416	3794	2998	4575	5992	3552	4499	1708	3955	2563	3494																6772	12982	6809	4891	4295	5111	4817	5574	5686	3778	5727
									4089	4059	3912	3571	5021	5203	3652	3487	3263	4073	3974																6765	3735	5206	5928	4204	5430	4477	3317	3467	4961	4816
									1973	4755	5060	3514	4219	3605	3457	3446	5670	2906	4093																3411	5593	5624	4355	4111	3163	2893	4116	4490	4722	4178
									3902	2960	4573	6059	2645	3373	3330	5423	6453	4380	4993																6067	3642	6108	4903	3470	3954	4811	3320	3989	3330	4473
									2420	4417	4470	2917	7185	2426	4093	4016	4093	4014	3621																6283	10126	4941	4862	5022	4171	4135	4152	4133	3747	5246
									1870	6503	4561	4206	7440	3709	4033	5857	2607	3364	2521																4715	6673	5128	5515	3650	5519	3243	6247	4074	5863	5522
									3807	2041	3845	3996	4048	6797	2806	5616	3979	2166	5858																7082	6555	5096	5712	6487	4445	2808	7812	5882	6989	4938
									3069	4543	8110	4207	2184	3434	4572	4289	4105	8980	6008																5184	6288	4412	3130	5082	5012	4780	5116	5192	4082	5667
									3356	6258	7374	3793	7576	5531	4816	3953	4368	6174	3272																4342	4480	4240	4200	2879	3453	3421	4721	6807	4256	4782
									5454	5878	3733	5209	2448	4668	4789	4955	2989	4359	3041																5743	4395	5057	4035	4688	4119	3657	6356	4061	6262	3997
									5230	4441	6704	4550	2634	5384	4265	3017	6480	4727	4881																4267	3502	4258	4238	4944	2656	8244	7769	4498	4283	4513
									4382	6262	3935	3066	5325	6969	4355	5619	5030	4794	4264																6537	5165	4697	5846	5813	3349	6137	3789	4564	4484	3646
									4317	3564	6371	3325	3333	4747	3440	3830	5347	3807	3088																5174	4581	4694	3115	5102	7404	11198	4644	4230	2983	5021
									3376	7583	4255	4977	3048	6034	5164	5009	3225	2971	3374																6429	6557	3017	3418	4095	2928	4665	5315	3106	3064	4409
									3546	3141	4744	6807	4102	5431	6839	4206	2420	3882	4377																3029	3759	4611	2669	5238	3511	4776	3371	4323	3381	5388
									4843	6547	5319	3933	2382	1999	4250	1971	3329		5361																6969	4738	5616	6976	5259	6643	3788	4832	4083	6101	3665
									6582	4724	4785	5851	4303	2037	6478	2384	4291		4793																5295	5309	5996	5561	6125	4216	5371	5414	2995	4737	4652
									4168	5350	3517	3740	3378	5283	3409	5203	3647		4931																5033	2822	6071	3903	5671	8295	3856	4493	5039	5311	3318
									2731	3161	5283	6010	6451	4062	4927	4852	4697		5352																5394	3455	4936	4264	3548	5491	7089	7234	3911	2738	5567
									4499	5353	6568	5247	5082	3627	4518	3017	6061		4518																10883	4579	4716	6334	4114	11193	5147	4299	3474	4782	3292
									5757	4030	6377	2415	2538	3504	3952	4799	5403		2470																4828	4568	4509	4117	4973	6908	6314	4186	5213	3693	8598
									6399	3399	2765	4556	4213	4986	4853	5099	3246		2893																4265	6622	3286	5888	4186	3570	6114	4714	4652	2987	4509
									5111	2631	2149	3834	3519	3981	4237	4593	2435		4696																4938	6778	4323	6355	3926	5321	6741	6228	2805	6565	3444
									7295	3686	4093	3045	3523	2491	5825	6169	3456		3947																4194	4845	4338	3610	5123	6949	4597	4081	4939	4866	5416
									5276	2967	5126	5545	3802	5049	3117	2764	4409		4796																4953	5846	4519	5284	4742	6575	3541	5122	4627	4896	5494
									5803	2519	4637	3016	4003	3250	5827	5013	5273		3522																4343	3823	4647	6203	6256	6084	4073	4612	5373	3627	6281
									4394	3515	5318	4756	2941	4193	4242	3226	4591		3049																6459	4904	3793	5251	3008	4749	3725	5883	3827	6390	4952
									6835	3939	5883	5989	1732	4328	4979	3374	2460		5186																5245	6495	5624	6083	3020	6151	5004	9778	5460	4612	5062
									5182	2870	4117	5663	2408	2944	5135	2290	4796		2992																9531	6323	5037	6293	3744	6362	4075	4948	4633	3968	5921
									4982	3591	6777	3895	4275	4197	5699	7027	5475		2758																5486	4051	5349	3484	3798	3411	5659	5969	3461	5492	3574
									4890	3104	4016	4282	3819	6159	5301	7001	3773		2609																5908	3181	5402	4582	3406	3782	5050	3134	3089	4463	3853
									7489	3558	4693	5159	4082	4558	2241	3037	2013		2143																6648	4039	4851	4499	3187	4901	4755	5097	3482	7274	3297
									5641	2660	4603	4179	4381	2593	7045	4850	4636																		11459	3694	2892	4154	9881	4270	4272	6139	3773	5274	10704
									5523	4551	6472	1991	5679	4010	5782	4950	3353																		8380	7214	3302	3229	4959	3816	6628	3893	3780	5025	3493
									9173	5186	5829	4918	2160	3908	5361	2325	4291																		5706	2794	3496	3076	5826	3835	6526	6861	4085	10099	3065
									5447	2734	2892	3435	2684	1596	3916	4106	2884																		4252	5596	6481	5902	4134	3680	4510	4994	4330	6023	3758
									2753	3234	3344	3064	6139	2451	5010	4290	3179																		5115	4602	4053	4868	8406	4685	5219	4316	5094	6323	5725
									6673	5097	2517	5421	3129	4519	5936	4890	2573																		5099	6228	4783	6393	7577	5025	4982	4968	7356	3361	4365
									6245	4212	2715	5941	4383	4355	4409	4710	2832																		5177	6550	6432	3169	9494	5319	4043	7374	5500	3692	3656
									5741	4214	4150	4712	4775	4672	4660	4574	4605																		5212	6161	4395	3393	4901	3076	4723	5247	4977	3413	4299
									7156	4485	2389	4566	4636	4072	5722	3472	3460																		4585	4112	4946	5822	3836	5397	3881	3478	4419	6859	4113
									5334	4629	4194	4959	5556	5061	5166	2207	4973																		5886	5637	7054	6755	3797	3412	5346	4075	3476	5712	5297
									4803	5307	12439	4096	4612	2969	2884	4816	3560																		3784	3982	7910	6442	6782	5193	4469	5638	4719	4005	4916
									10070	2970	3995	3913	2315	3636	2897	5872	2932																		4395	5495	4051	3879	4846	4056	5076	4492	3684	5816	3666
									4005	6286	6818	4490	3582	3589	3388	4017	4675																		3890	5782	5445	6799	4662	3603	4171	4773	4195	5102	4349
									5409	7684	4317	3404	3577	3414	4328	2677	4898																		5354	4309	6679	3557	4699	4234	6667	4957	2930	4258	3835
									5781	3145	3650	3337	3909	3647	3726	6060	3560																		5065	5191	6058	5734	5653	4045	5125	4086	4266	3921	5636
									6858	4145	2344	4461	5464	3017	2726	3993	6152																		3346	4194	3839	4737	4039	5503	6555	4979	2884	5378	6866
									3940	3951	4575	6428	4962	4222	9066	2837	5156																		3867	5440	3093	6546	4400	2606	5016	4877	5715	4410	5666
									4391	4209	3460	4779	5321	4083	3815	4738	4076																		4207	6238	7007	3790	4321	4608	2668	5478	4697	2887	5402
									5812	4419	3098	4725	2783	5231	4709	4446	3986																		3547	5076	2727	5320	7253	5286	6180	6485	6754	3457	5157
									7408	3560	6091	4407	1831	5010	3302	3855	3360																		2805	3114	6080	3491	4818	7373	4340	5439	6008	4618	4457
									7202	4789	3955	4338	5381	3511	3808	6563	4626																		5158	5277	3686	4607	2700	5991	3501	5539	3379	4919	6530
									3803	6628	2464	1679	4935	5607	1659	2912	2964																		4206	5734	9068	4075	6544	3503	4113	4361	3569	5533	4823
									4570	5272	1706	3385	4592	3845	2147	5727	3609																		4400	6831	4949	4701	3572	3668	4266	4386	4920	5740	4455
									4555	2009	2840	4151	6710	7491	3435	3669	4144																		3165	5203	4719	3606	5127	5322	4283	2614	8150	3599	4818
									3952	4598	2438	2737	4297	5007	6198	4105	2848																		5665	6225	5589	4415	3813	3878	4760	4492	4807	5141	4710
									2613	3817	5181	5223	2818	2203	4983	3535	2318																		4932	4249	10454	3884	3654	5806	5637	5376	4562	4223	4203
									4711	6227	3783	5986	4529	5955	3315	4529	2255																		12678	4122	6593	4338	4614	7337	4437	5012	4806	5585	5144
									4653	3433	2490	5492	7847	4633	4332	2858																			4136	3653	5348	3895	5198	5587	3099	4753	8054	4764	3783
									5681	4159	4457	4288	2767	2284	3347	2317																			5115	8108	3841	4060	5067	7388	9890	4186	4842	3836	5099
									4892	5976	2738	2857	4066	4890	3461	2176																			7384	6784	4108	6206	4114	4674	5756	3353	7307	3664	4193
									7311	4082	5993	5198	6566	4853	5529	2986																			5431	6345	6301	3386	4556	4759	4678	3684	5653	3770	4294
									2049	2148	4717	3099	4680	4175	5806																				6070	3571	4494	4397	7368	4227	4309	4093	4310	4733	4428
									3840	5547	3891	3129	3634	3285	5753																				13089	8203	3123	3651	4731	4137	5979	4397	5075	4387	3244
									4542	5416	3198	2865	5170	4875	7356																				4894	5909	4492	4331	3937	3704	3849	2797	5238	6581	4383
									3864	3650	4732	5799	3268	2718	2817																				6630	6223	7128	3657	5615	5590	4126	3837	6259	4161	2514
									3868	6557	3541	2696	4323	2896	3286																				6586	5522	10937	3081	6746	4819	3479	4373	4313	4052	4630
									5173	5349	3722	4879	5777	3070	2143																				5396	4863	4850	3990	4824	4306	5921	3694	5991	3673	4982
									4457	4785	1672	5945	2916	4741	3824																				8603	4981	4195	4778	4947	4418	4794	5710	4454	4146	5664
									5887	7212	3199	4372	4360	5337	4898																				3571	5129	4952	4717	3265	6306	3551	4746	5201	5299	5411
									3135	4343	3877	4238	6190	5321	2524																				6594	4161	6443	9359	3989	5563	5287	4954	4000	4737	4519
									1448	3245	5870	3076	3179	4387	2906																				4534	6531	3307	7286	4077	5111	6156	5131	3505	6757	6501
									2657	2876	3966	4328	1955	4983	1692																				7511	5208	5137	4818	3792	3638	4374	4320	5621	4001	4568
									4403	2511	4987	7585	3251	5604	3972																				5701	5261	6521	5404	3968	4033	3522	4224	3827	3640	5123
									4447	6836	3248	7100	4568	4493	4701																				6093	6721	4591	9195	5936	3288	4986	4490	4240	3573	4541
									3148	3355	3986	5559	4691	4816	2912																				7612	5593	3295	2826	5473	4801	4786	2865	4262	4352	5699
									3580	5670	4597	3192	5595	4218	4575																				6080	6791	3846	6673	4210	5627	5227	4730	3121	4975	4185
									2218	3556	5139	5673	3891	4376	4787																				5312	4677	3695	10121	4253	4414	4521	3493	5976	3356	3055
									3169	6268	5509	3695	4985	4387	3505																				5209	10591	6391	4527	5487	5611	7794	6113	4297	4848	6214
									3480	5069	6504	5529	4288	4653	3463																				3780	7791	4580	6773	3776	4604	6619	3976	5071	4297	3949
									3090	7010	3360	4425	4943	4250	2460																				3841	5346	4469	5605	5848	3980	2368	7354	3869	4858	4864
									2602	4464	4735	6832	3388	3275	6573																				6539	5529	4077	6187	3833	5890	5307	6353	4795	4590	5676
									2455	6195	5467	4500	2426	3082	3415																				4694	4146	6110	3015	4606	5231	4837	4684	5500	2670	4796
									3817	3395	4041	3487	7112	3450	4116																				6043	3650	6031	4782	4388	4865	3506	4567	4880	4052	3365
									2906	3899	5376	6683	3473	5859	5000																				6128	4360	6197	5550	3972	4298	3673	2678	4592	4147	3665
									2955	5729	4747	2220	4598	4367	4041																				4310	4019	4037	6725	4872	3959	3290	4023	4579	5145	4509
									3021	4519	4656	4360	4982	2548	6964																				3762	4774	5452	4220	4174	5229	6519	3340	5532	5256	4909
									3019	7149	4723	3083	5146	3700	2710																				3744	3906	3319	9382	3182	5020	3945	4195	3787	7263	5102
									1723	6071	5720	5293	4614	5339	5717																				5853	3939	6088	5210	4600	5988	4520	4614	4834	4754	4112
									5834	6035	3182	4574	4134	5766	4064																				4446	5040	6736	5166	4029	4148	3801	3294	4555	4857	6109
									5445	5249	2488	6016	3396	3820	4868																				7209	5401	4537	3714	4064	3716	4446	4925	3619	5113	2745
									3011	5604	5232	4279	4656	3054	4726																				4038	7599	6963	3732	3948	4097	3895	4588	2438	3222	4682
									4118	3917	4682	4182	4719	3767	6938																				2969	5310	5529	3689	4726	3540	3991	3935	4853	4619	3824
									2458	5099	5773	1992	3594	8165	6234																				6082	3909	4404	6260	4156	4946	4231	3684	5040	5015	2980
									2889	5027	4158	3744	4101	4644	6560																				3942	13065	5582	3564	5861	6060	3858	4303	2636	3213	2776
									3056	4728	5816	4472	3469	1415	4779																				3361	4508	7434	4020	5689	3099	5219	6245	5499	3752	6538
									3284	4537	4951	2484	5063	4831	6147																				6575	5401	5519	4796	4620	3610	5291	4288	4322	4891	3055
									3488	5383	3761	4338	5222	4555	5212																				8070	5406	4302	3695	4637	3958	7838	4351	4183	5445	2474
									7383	5356	3658	3830	4125	3553	3790																				6215	3696	3750	4578	5953	4279	5451	3445	5765	4490	5613
									2821	5237	2916	5563	3994		5795																				7377	5380	5515	7503	4902	5592	9085	3098	5207	5515	3798
									1663	5162	4197	6340	3830		3549																				4678	2895	4082	5653	5499	4846	4467	6870	3673	5020	5921
									3836	3429	5405	6387	4497		3490																				4724	4372	5500	4579	4302	4051	5151	7060	3413	4102	5281
									2696	4077	3614	4142	7771		3682																				4691	4800	4612	3836	4347	4131	4046	4499	5004	3537	8730
									4217	4964	5242	6182	1958		4698																				6842	6448	3648	2971	4007	4129	5207	5456	6099	4857	3375
									4287	4649	7688	5260	3347		3566																				6335	5620	5078	4940	6372	4229	4592	3613	4655	4288	4326
									4577	3493	3521	1880	6040		2314																				6108	5883	4706	6354	4051	5593	7493	3789	6248	2873	4003
									4836	4958	2260	3043	4273		4050																				4077	2956	5658	6293	4969	3060	7094	6757	4075	5203	4452
									4689	2684	3159	2478	4958		3650																				6199	4996	4062	4483	5106	3585	4307	5082	3747	4049	4134
									5479	3927	3624	4640	3587		3103																				4388	4769	5026	3797	6807	3316	6224	4535	2767	3933	4052
									5540	2763	3062	4538	4427		3427																				6252	4017	4516	4395	4701	5106	4589	5346	5229	3722	3826
									3308	3533	11510	5436	5451		5706																				5365	4783	6482	4080	5407	5463	2713	5011	4114	5650	4983
									5252	3418	5101	5765	4486		3443																				3403	3781	3526	3562	3867	4632	4286	3590	3818	3541	3536
									5310	3253	3281	5773	4595		7904																				4998	5514	3295	5662	4241	6639	3739	7450	4514	6474	8901
									5533	2151	4558	4746	5344		4570																				6268	4021	4221	6000	3741	5234	2647	5185	3845	5006	3262
									5460	2609	4947	4128	1997		3922																				6249	4534	5016	4020	3793	10077	3137	3952	4565	5199	4776
									6630	1986	2547	4196	5036		2218																				4964	4886	3172	3046	5006	5815	4677	3505	4709	5754	3722
									4341	2032	6271	4079	4223		3386																				5182	4961	5137	3341	5669	5649	5203	4652	5224	4410	4393
									5286	7480	4833	2456	3327		4038																				4262	3475	4814	3620	4125	5381	5340	8684	3879	5881	4405
									4574	4443	3535	4369	6926		5694																				6146	3415	4712	7442	4817	8417	5349	4189	4243	4867	6672
									5345	1659	5784	5034	4820		4381																				5798	6466	5406	6128	4594	4025	6197	4044	4339	2595	4712
									2894	4170	4296	5160	4141		5137																				4220	3960	5041	5256	7263	4987	3922	8371	5272	2856	5041
									5268	5044	1930	3235	3919		4567																				8318	3895	5737	4540	6601	3991	4922	5420	4338	6397	4620
									7757	4944	7339	4678	5078		4193																				4593	4414	4545	3277	5628	6541	4916	5963	3224	8698	3367
									6032	2954	4605	5878	4378		3338																				5785	7192	5185	5562	3920	4559	4695	4733	3045	4572	5542
									6504	3679	4288	4083	6115		5811																				5023	4394	3678	3936	8842	3382	5289	4460	4797	4807	4847
									3240	3617	4654	6262	4956		3536																				3971	4215	3283	4944	6215	4208	3962	4373	2763	7747	3639
									6462	6997	5542	3657	3821		3388																				5852	4308	5806	3412	10364	6031	2934	4208	3690	5050	5059
									4747	10071	3805	2841	2965		4268																				5055	6172	4170	5850	5530	4106	4413	5416	4816	4959	8129
									5406	3788	4139	3017	6260		3719																				6145	4183	5216	3805	4370	4062	4111	4036	3845	3708	4871
									5612	5039	4317	4964	6054		4885																				5048	4838	3187	2547	4512	5034	4276	4132	3868	4649	5758
									6468	5519	3071	2771	4391		1917																				10228	3188	5536	4365	6497	6771	6690	7391	2963	6499	5469
									6441	4314	3692	6702	3417		3930																				5520	6876	5447	5324	4438	3944	3947	4877	4479	4567	4464
									6146	5816	5280	6049	3154		6705																				3655	6495	5067	3578	4679	3370	4545	3801	6632	4817	4952
									5340	4009	3565	3257	4540		3253																				13989	3232	4725	4789	5273	3506	3707	5255	4845	3869	4377
									3786	5559	2578	3143	4632		4373																				6481	6706	2910	4283	4027	4566	2982	4449	5244	5942	4653
									5753	4544	2270	3688	4848		3043																				4353	4983	5678	4873	2959	3987	5163	4195	4194	6865	5269
									4427	5216	4078	2329	4767		5283																				5330	5366	4797	4748	4417	4944	3729	5750	4057	3980	5273
									2348	3709	2844	3325	2688		5046																				4222	4410	4846	4783	3971	4422	3933	4392	3522	4590	6135
									5203	4325	4398	2288	3279		3245																				5266	5412	6129	2920	5736	4928	4462	4847	4741	5696	4367
									4787	5703	2797	2792	4573		4054																				4980	4879	4967	6700	4170	3907	3386	3882	9605	5870	6264
									6299	3317	4041	3937	5320		4870																				4842	4624	4987	6987	8309	3555	3442	5675	4480	5389	4553
									5201	2660	5594	7845	4410		4450																				5156	4224	4934	5399	4045	4608	5116	4858	4396	5811	3605
									7488	5626	5792	4314	7751		1811																				4114	4709	4095	8142	3998	5273	3868	7074	8317	4405	3208
									4517	3848	6073	3132	5061																						3233	3914	5164	4374	5332	4551	9340	6101	5100	5576	4298
									6382	3334	6273	4855	4262																						4400	3844	4330	7090	4487	5118	4364	3118	4815	4237	3731
									1914	4983	5476	3486	3071																						5405	4046	3309	4882	4458	7332	5149	5699	5448	3430	3227
									3579	6590	5343	3358	6383																						4451	4908	3883	5038	4780	3228	3822	4109	6474	4207	5528
									3877	4246	3662	4551	6904																						5382	4739	4249	4787	3922	5078	4441	5878	4821	3589	6899
									2569	5932	5383	2938	5122																						3751	5789	6003	5939	5486	6184	4852	5430	4265	5245	5635
									4023	4945	5491	5806	6813																						4459	6068	5349	2912	3505	5727	4682	5355	5184	6459	7507
									4224	4764	5115	3481	1642																						4019	4095	5245	6358	6007	4123	4528	4593	3993	6751	7918
									3919	3432	3530	5122	4092																						2576	6674	5425	4669	4845	7056	6679	5002	4632	5244	4625
									5513	3141	2928	5158	1839																						3729	4725	8584	3776	5685	5632	5989	3681	3897	4623	4444
									5483	5369	6164	4592																							8307	4716	6320	9068	4223	5865	3637	3324	4832	3244	5346
									4494	4986	5495	6792																							5113	9195	6323	7773	4579	5126	5010	4494	5523	3510	4579
									4638	5971	5125	4855																							4889	5634	2884	5629	4893	3817	6267	4405	6056	4121	4153
									6238	4329	2838	4143																							3657	4405	4884	4676	3467	4158	4114	3380	4804	5526	3993
									2643	6044	2617	4743																							5608	5943	8138	7709	4505	4702	3318	5847	4710	5731	4705
									2726	3094	3263	3722																							10861	7212	3690	5559	2794	4393	4967	4288	3177	4400	4776
									3255	6537	4401	3210																							4619	6551	3150	6566	4279	3151	4074	5722	4479	3192	3512
									3896	4823	3184	4103																							5666	5622	4626	6386	4943	3887	2994	6685	4991	4803	5375
									2743	4178	4516	5409																							6504	3569	6708	4823	5597	4836	4550	4290	4231	5684	4674
									3743	4703	7050	6145																							4868	6836	11286	4016	4266	4422	4611	6274	3599	3873	4206
									3366	3888	3387	4532																							6224	6625	4353	3664	5120	4580	5617	4479	4248	3437	3695
									4320	4502	5333	4876																							12171	3331	4424	5178	3940	4027	3667	4347	4704	5641	4025
									3667	4599	6844	3885																							3231	5985	3527	6960	6177	4348	4789	2697	5026	3542	5653
									3655	6698	4156	2229																							5586	5071	7601	4405	4250	3886	6210	3437	4422	4732	4410
									3322	7023	3628	3916																							5297	4848	3061	5821	3343	3393	4661	5747	6349	2926	4546
									2359	5810	4897	3964																							5229	5734	5772	5909	3854	5517	3881	2932	4268	5899	3845
									4610	4417	3728	2671																							7356	3918	4091	5374	3647	5724	3719	5078	2944	3764	4280
									2879	6069	5593	4174																							5436	5423	4928	5555	4866	3271	4406	3641	5029	5250	4067
									2678	2507	2936	4292																							4057	4334	3359	4612	3820	3919	5945	3387	4009	3698	4401
									3714	3580	1965	3942																							5722	12735	4841	4430	4372	3413	5027	4572	4502	5977	3997
									3820	6224	1821	7278																							4960	9062	3859	6801	4409	3994	4736	3841	2955	5788	4572
									4544	5068	2973	5519																							6956	4477	6074	3222	4264	6498	6911	4451	4447	4106	5635
									5703	3705	5617	7014																							5383	4178	3470	5292	3916	5095	4868	3205	3202	4207	3194
									5624	4061	2903	4289																							4079	5384	5135	3756	4193	3840	5265	2861	2870	3481	3949
									5811	2560	2802	2855																							5019	4069	6484	5257	7209	3396	3694	5969	5894	4550	4889
									4826	6184	7136	3510																							4501	4026	4104	4155	5957	4185	3578	4444	4927	2938	6780
									2180	3868	5466	3665																							3084	3103	4538	3501	4364	4712	5634	4575	3686	3277	4561
									2705	4911	4492	3850																							6083	4742	4234	6122	4493	5186	5255	6126	5753	4522	6472
									4246	5055	6255	4853																							5339	3011	3181	5736	5996	2730	4053	5256	5078	4322	5116
									4878	3713	5387	3450																							5410	3646	5636	5198	5054	7358	4776	3674	5455	5007	6596
									3511	3374	2365	4565																							4445	4727	5841	4220	4398	4002	5306	3613	4959	4570	4689
									4586	3427	4740	5703																							5673	3882	4349	3225	4992	2956	3409	3613	8492	5098	5989
									3118	5674	4065	4996																							3478	7370	4865	6548	3171	3247	5358	4307	4446	4993	4024
									2402	3748	3696	5060																							3968	4910	4400	6709	4016	6340	4053	5539	5352	3657	4474
									6115	2553	4659	5258																							3049	3670	5389	4313	5061	7040	6604	4655	4580	4761	4078
									3093	2757	4501	6099																							3891	11878	8188	4749	3265	5268	6500	4341	4135	4849	3775
									5571	2961	2740	2603																							5605	4403	6342	2496	5262	3205	7934	3839	3146	3440	4173
									6103	3625	5173	3619																							5739	5660	7582	3226	6138	3011	4453	4401	4811	5325	3481
									6564	3574	5020	4989																							5193	5400	3542	4345	4999	5135	6454	6711	3771	3792	9638
									6506	3488	3375	4599																							3345	2708	5803	4693	6213	5513	6260	5725	3577	5075	4660
									2931	2379	3399	5045																							4867	4422	3716	3042	5530	4008	4117	5451	3555	5619	3752
									2051	3661	3387	2712																							3771	2900	4738	3944	4251	3700	6856	5902	3652	4323	5010
									5855	2275	5078	5779																							4282	3732	4311	5879	3721	3347	5769	5304	3432	3799	4798
									3176	2119	2870	4307																							3421	6432	4248	5254	3434	3763	5028	5315	6877	4092	3493
									4540	6563	2244	5445																							4453	6447	3791	5510	2739	4040	5687	6043	4224	5618	3120
									5462	7163		4168																							6679	3949	3336	6132	4587	6321	4408	4892	4669	3534	4549
									4806	3167		3547																							5444	5125	5248	3976	5237	2829	3684	4080	3780	4664	6814
									2963	2969		4494																							5035	6366	4903	5170	4928	4997	3735	4267	4057	3527	4130
									4063	3617		2932																							3159	5304	4677	4258	5645	3076	4196	5664	6099	3387	4302
									4944	4439		1706																							4984	5087	5581	5524	4788	5378	4454	7310	5268	3924	2946
									5864	5033		2347																							5201	4308	6936	2634	3066	2810	3692	7814	3895	4198	5059
									7933	4639		4700																							3543	6258	5316	5891	4394	4424	4999	4341	4455	6261	3428
									6639	12531		1601																							8493	4635	3187	3922	6244	4887	5340	6493	4397	3625	4153
									6609	1839																									6596	5785	3782	4499	5022	4177	4084	5759	4198	7755	5657
									6769	4193																									4630	4580	6135	2935	4414	8853	3604	4707	6006	5160	3284
									5832	4719																									5750	4692	5205	4132	5139	6772	4505	9186	6243	3394	5248
									6716	5785																									3955	5798	3648	4185	8287	6004	4814	5726	4357	8704	3039
									5466	4285																									6670	4514	3963	4074	5861	5223	3635	5306	4938	5801	5312
									6833	3472																									5046	3654	6588	4189	3472	3845	4889	4465	3750	4465	4955
									5894	6667																									4807	4297	5814	4344	5280	4989	4261	5180	5011	8503	4347
									6903	4536																									5954	6831	7113	3801	6747	7534	2962	4581	4086	2898	7574
									8003	4263																									8844	7059	3305	3141	5918	3979	6042	6827	3643	5654	4232
									2369	1765																									4711	5139	4221	4410	9670	6406	4213	3573	5976	3533	5069
									5409	4632																									5721	4084	4479	5958	4824	4147	5281	4873	2738	4424	3525
									5207	4749																									4772	6459	3627	4126	4357	12943	3490	6843	3944	5416	3056
									6528	5506																									4876	5513	3118	4804	4647	4992	2261	4524	6408	4430	3439
									4888	2551																									4275	6217	3601	5155	5096	3122	5212	3526	3396	4310	3127
									5291	4295																									4047	3666	4353	5115	5387	4275	3566	4937	8847	3341	5663
									4643	5700																									5417	5230	3635	4959	3681	3468	3933	4814	7697	4227	5677
									4324	4895																									5256	4736	5454	4137	4782	5453	8767	4005	3744	4929	6074
									4323	6206																									6170	5431	4006	4994	4124	5750	4379	4477	3597	4504	5786
									4990	4185																									6669	5673	6361	5417	5051	5693	3163	4240	6423	3390	3342
									5430	6710																									6561	6309	4932	5028	3874	4338	4961	4790	9016	4229	5303
									3520	5602																									5953	3929	5083	3974	6149	3491	5669	4035	4568	5186	8807
									4969	5606																									5999	4185	6019	3158	3904	3296	3763	4728	3865	4801	5458
									6699	2886																									10149	5724	4470	4044	3587	4003	4900	5580	9520	4874	5384
									8762	2587																									4259	5112	3747	3601	5195	4358	5090	5318	4136	6322	4857
									5539	4552																									4780	4755	7466	3996	5258	5118	8275	8737	6077	4004	3639
									7658	3761																									5564	4789	3909	3227	3549	3442	3566	3278	4560	3868	4049
									3514	3009																									5115	4111	3720	3535	4673	2755	5071	5382	5538	5572	4767
									6652	4222																									4995	4705	5392	4079	6019	4787	4728	2790	5475	4628	4242
									2968	5453																									6697	4534	4598	7546	5142	4444	3222	4676	5101	6591	5363
									4662	4375																									5727	5573	6043	5131	3884	4164	4773	4388	3968	4736	6594
									2062	4065																									10567	5002	4364	6842	5436	5287	3560	3931	3562	5236	6050
									4880	5414																									3809	4858	6501	5187	5717	3652	3644	4795	6905	4545	6654
									5920	3190																									4886	4907	5083	6975	3649	6177	4117	5998	5212	4563	3934
									6031	4169																									11209	5351	5893	6543	3420	5688	7303	3772	2847	3277	3843
									3743	3045																									5933	8856	3882	7278	3415	5846	5782	5054	4381	5429	4793
									2420	3769																									4897	5454	4110	5076	3463	4819	3571	3402	4673	6637	4350
									3457	4131																									3118	5689	4897	4033	4969	6050	3540	2922	3978	3881	4312
									5177	3226																									4459	4908	6081	7154	4525	5245	6201	2853	6217	6316	3807
									4326	2933																									5945	5002	4760	5894	4856	6082	4607	5364	4726	3489	5173
									4655	3614																									5152	4785	3509	4683	5711	6151	3569	6302	5330	4779	4370
									3418	5518																									3980	6323	3235	6102	6229	4990	3256	5207	3716	4125	3191
									3517	4546																									3498	3295	3560	5816	4396	5620	5445	4645	4852	3472	3623
									4522	6280																									3707	2828	4567	3824	2755	4973	4772	5130	5734	3327	4219
									6287	4070																									3490	3131	5199	4740	5515	5383	4174	3823	5066	3554	2718
									3406	3699																									4236	3654	9275	6545	5669	4167	3806	4979	5042	4263	3742
									3793	2104																									4573	2819	6569	5141	3824	5734	5252	4975	4137	6175	3997
									3907	5546																									6680	5393	3748	4482	4025	4221	4205	4614	4875	4837	5269
									4424	4859																									5313	3070	3361	5271	3931	3837	4067	3246	3020	3943	4406
									4096	3176																									3409	2954	4559	4373	5271	4312	5477	3844	5072	5036	4955
									3207	5754																									5194	4956	6964	2948	3820	6068	3536	4360	5081	7153	3527
									3948	4902																									2612	7059	3754	4332	4607	4937	4126	6247	6340	5243	3200
									2374	2708																									4600	5339	3347	5635	3386	5107	5041	5097	4503	4950	2869
									3297	7635																									5618	4228	5114	5543	3744	4457	5332	3602	6967	3938	3884
									4461	4416																									2954	5960	6279	3874	5746	3248	5496	5185	3413	4764	3946
									2943	2335																									4745	5208	9883	3786	6295	3823	6036	4701	3208	2472
									3457	4749																									4438	4097	5997	6179	4049	5126	4482	3227	6835	3232
									5251	4150																									4999	5838	4619	5443	4973	4880	6104	3870	4519	3306
									7856	5782																									13322	7236	4869	4175	5324	5151	3851	3048	5055	6840
									6905	3944																									4934	5898	3634	5523	5728	4004	3165	3921	5198	4238
									3575	3562																									5831	6569	5545	3271	5911	4072	8815	4820	4559	3854
									2369	3457																									5749	4476	4363	5188	4204	5591	3143	3265	4374	3233
									4001	2876																									4336	6005	4537	6729	3666	4926	2409	5435	4390	4439
									5290	3913																									10332	6083	3765	5161	4692	3440	3595	3571	4787	3753
									4471	3070																									4650	4700	3799	4731	5520	2686	5151	2998	5326	3911
									4719	4671																									5318	5941	3298	3274	2977	4673	6538	4346	6639	5054
									2792	3729																									5032	4596	3386	4678	5616	5153	5755	4112	3565	5410
									1983	2461																									3320	12802	7354	3847	4343	5426	7985	4217	4691	4954
									5425	2619																									3575	6516	6548	3942	4829	4466	4686	6063	4163	3739
									5215	4079																									6842	5723	4804	6511	7185	4557	6322	3891	4212	4781
									5858	2296																									4775	4487	5051	4414	5573	3546	4938	4342	3727	3914
									4235	2291																									5934	5498	4663	5100	4897	7013	3786	5148	2695	4322
									5059	4566																									6682	4262	3125	3401	4817	4915	3923	4147	2671	5913
									5972	6360																									4494	5464	5487	3594	3993	4273	6161	5477	4032	4639
									4455	4281																									5773	2771	6478	6600	5670	3008	4841	6319	6318	6110
									4872	5764																									5144	5235	4343	6137	4625	3521	4636	6336	6114	6696
									7360	3994																									3416	7170	6343	3012	4641	3430	3114	4565	4896	4207
									4677	5571																									4599	5316	4753	2730	5243	5975	4648	4803	4906	4586
									2160	3609																									4866	12011	6548	4846	5329	4787	4345	2927	5329	4434
									2901	5321																									4743	5557	4188	5044	3982	2841	3241	5760	3572	4008
									3769	3731																									5576	5568	4282	4404	4907	3798	4653	5126	5297	3445
									7411	8210																									6082	4505	3975	4979	4868	5222	4827	3793	4649	3308
									5108	3457																									2867	3227	5932	5540	5425	6902	5402	3726	4093	3437
									3777	3696																									4605	5474	4013	4690	6572	3673	5434	4689	4644	7859
									4328	4090																									3239	2859	4709	4328	6516	5393	4130	6478	4150	5816
									4939	4627																									5305	5406	3184	5296	4935	3207	4188	7288	3103	5035
									4058	4632																									4389	5386	5068	4183	4105	4277	5527	6012	6212	4061
									7748	4876																									6543	6667	3441	3312	5308	4681	4603	5950	7127	3939
									7281	4900																									4631	5007	2868	5424	4696	5959	4242	5429	4957	9518
									7233	6994																									3597	5298	4460	5123	2895	3992	3310	7211	5005	3732
									5856	2692																									4414	3761	7084	5607	3220	4020	4328	2936	5531	4551
									5470	3806																									4061	6961	4780	3787		2958	4426	5889	4111	9887
									6854	2154																									5875	4524	5375	5430		3416	5468	8106	3352	4195
									4698	4333																									4616	4669	6183	4508		3707	3670	3858	3165	4289
									6295	5138																									5443	4646	4155	5717		3015	5189	5912	4349	3529
									9105	4955																									7281	5059	5503	3572		5141	5235	7677	4755	4474
									7867	4868																									6917	3901	6506	5216		2763	3655	5759	4724	3745
									7899	6511																									5269	4990	3265	4939		5760	4303	5501	3957	5825
									3309	3646																									4690	6114	2648	6839		5272	9725	3831	5202	3696
									6299	4782																									6084	6038	3111	4897		9614	3580	4762	4855	2902
									4302	7241																									5534	7568	5695	3992		4261	2807	7654	4701	5588
									5618	3507																									4395	5044	5684	3880		3646	3771	5184		4412
									5142	2380																									4988	4096	3334	4496		4537	4650	4942		2579
									3784	2242																									4100	4334	4239	4635		5535	4107	3640		5561
									4125	6175																									4929	4447	3826	3894		5458	5212	5779		4264
									5922	4277																									3860	4940	5245	5732		4191	6354	4683		5555
									6634	2274																									9318	3940	4079	3848		4423	6061	5505		5195
									7997	2871																									6978	3821	3893	4528		5110	6081	3561		3612
									3252	5396																									5050	5194	6082	3087		5250	2999	4529		3860
									3775	3626																									6036	5689	5098			5068	3939	5530		4370
									6487	5506																									6125	4099	5819			5880	4722	6145		3857
									3620	4974																									4595	4922	4325			5435	3439	5567		4119
									6872	3799																									4955	4351	4908			4683	3273	5633		10105
									7397	4161																									4421	6064	5275			4144	4028	5070		4337
									4969	4482																									6378	5961	4977			4961	4575	3874		4492
									2772	3481																									4185	6210	4029			4740	5653	5619		4259
									6089	7588																									9099	2994	5978			5800	7498	4041		5217
									4386	3485																									4338	4403	3962			3154	5280	5902		4701
									5087	1917																									5634	4024	4161			3748	4542	4468		6351
									4319	4284																									4691	4504	4350			4474	5137	5221		3856
									5183	5182																									5097	3495	4195			3382	4896	3408		3705
									4233																										5474	5693	6079			3430	3273	3835		4280
									5187																										4369	5469	4381			3441	3335	4623		4656
									4171																										6019	4199	6960			3332	5566	3078		3678
									4257																										6589	5337	5511			5837	5268	4161		4566
									2893																										4218	5029	8526			4187	4661	6309		4755
									4273																										5158	6021	5111			5408	5736	3892		5967
									3172																										4463	4949	4559			5222	5742	3336		4114
									5166																										7981	7575	4646			4176	5499	3446		5832
									3394																										3906	3661	6683			4416	4455	5959		5163
									2837																										6754	4137	5975			4585	4719	4460		5524
									2321																										4047	3878	5019			4815	2831	4611		3905
									5454																										4181	3775	4234			6282	4592	4658		3892
									5500																										7032	7566	4889			4398	7960	5062		3420
									2054																										6113	4497	4826			6139	6117	2662		2820
									5454																										4684	6404	3831			5649	6538	3998		2690
									3800																										9928	5407	4540			4151	6145	6323		4053
									2633																										4361	4530	9928			4469	5089	3875		3531
									3973																										4536	7712	6746			4450	7081	4596		5369
									2185																										13078	6149	5581			3170	4285	5611		2991
									4501																										5579	3525	6349			3223	2545	4795		4281
									4160																										5066	4603	5543			6556	4650	3919		3787
									5307																										6551	4279	6380			4466	2970	4499		2742
									5251																										4254	3598	5169			5732	4491	4873		5197
									3237																										3538	5082	3124			4103	5383	3731		3248
									2669																										6036	3494	4304			4359	3889	6213		4037
									3606																										3849	3318	6309			4978	4874	3907		3344
									3317																										7063	3587	11181			6750	3703	3489		4413
									3789																										5003	5054	3824			4680	3210	5769		4999
									5185																										3077	7908	5526			4626	3425	7077		5242
									4785																										4845	3490	4619			4833		4605		5633
									1852																										4278	5547	4765			5391		7323		4873
									6498																										4163	3143	3190			5807		3526		5255
									4462																										4530	9167	5040			4272		3464		5674
									5203																										3378	4973	3120			3398		5431		4026
									4202																										3936	4372	3798			5086		4635		4911
									4085																										6349	6473	3995			3250		6485		4977
									6543																										3006	6001	4047			4928		4666		6110
									6623																										5468	5905	5147			4781		4171		3007
									3506																										4329	5779	5961			4532		2748		5736
									7068																										4542	3332	4454			5660		3996		5506
									7220																										10829	8569	4240			2959				3164
									3011																										6427	5626	4420			7088				3106
									4733																										4217	5125	3104			5318				4067
									5572																										5638	11345	7243			4368				4477
									2474																										3461	6605	5333			4287
									3065																										11008	3577	4855			5206
									5819																										6138	4612	5223			5412
									2032																										5821	5046	7303			4313
									3598																										6347	4395	6332			4493
									6950																										3306	4533	6358			2808
									4600																										4778	4420	4871			2803
									4223																										6335	5652	5555			6139
									4378																										6009	6789	3516			5696
									3287																										3840	6275	4220			2892
									4446																										6620	9656	4678			4364
									6992																										3761	4708	4766			3733
									5111																										5729	4656	3842			4585
									6137																										4345	3544	3159			5615
									7538																										5396	4073	5640			5935
									6569																										4872	5533	5167			3918
									6318																										6158	3138	4121			3992
									5202																										3557	5301	6141			4844
									6469																										4142	5973	4941			3803
									7896																										2897	3922	3507			2959
									5658																										5349	4743	4123			4062
									4493																										4488	5459	3309			3378
									5818																										7455	3693	4177			3976
									2684																										5146	5840	4560			5069
									4311																										4356	4847	6337			2897
									5878																										4312	4248	7195			5552
									3754																										3643	6025	4263			2606
									6551																										5629	3978	4826			5108
									6805																										5074	5099	5207
									6257																										6011	5351	3653
									5902																										5265	5479	3297
									7875																										4058	4789	4545
									3669																										6338	3671	3670
									5798																										5533	4533	7361
									6239																										5943	4463	4924
									6500																										4325	4160	6413
									7088																										5892	3954	5554
									6252																										5947	7126	4645
									2388																										5581	5231	6564
									5183																										3601	3658	4141
									5238																										3676	5019	4391
									4664																										3031	5323	3549
									5760																										5716	6259	6197
									3984																										3843	5470	5087
									5016																										4122	4538	3075
									3333																										4454	4490	5243
									4508																											4209	5894
									5051																											4348	6290
									3126																											4645	3734
									5427																											4258	4298
									4227																											7966	5725
									3918																											6498	5663
									3395																											4435	4986
									3610																											5507	7941
									3283																											4163	8127
									3826																											4146	3501
									3472																											4729	4828
									2492																											4633	3467
									3396																											6525	3227
									2243																											5794
									2816																											4873
									3507																											5809
									3322																											4689
									3826																											7359
									5096																											8043
									5528																											3917
									3907																											4951
									3362																											4804
									2183																											3402
									5871																											4421
									5091																											4984
									4398																											6016
									6476																											5960
									4557																											3974
									2169																											3826
									5747																											3257
									5211																											4609
									8386																											3109
									5548																											3518
									6226																											6138
									5437																											5258
									3656																											4056
									6155																											4074
									4987
									3578
									3158
									5022
									6040
									4446
									1664
									2340
									7189
									3660
									6133
									3466
									4187
									4651
									2464
									3825
									7879
									4565
									5145
									5076
									6315
									4945
									4693
									9275
									6132
									3735
									3511
									9009
									4881
									7552
									4428
									3216
									5104
									4808
									4261
									4229
									4067
									4201
									4373
									5162
									6656
									4267
									6193
									4437
									4697
									7217
									4420
									4401
									10042
									6103
									4636
									5292
									3369
									8570
									3831
									6665
									5412
									3479
									5257
									3419
									3968
									5483
									4463
									7157
									6290
									4228
									3998
									4417
									5819
									4730
									4038
									4518
									7380
									4155
									4730
									5203
									5524
									4018
									4220
									5760
									5692
									3610
									6381
									4629
									4612
									3759
									3499
									4416
									5724
									6498
									3572
									5081
									4791
									4183
									5382
									5035
									6060
									4414
									4079
									4056
									4392
									5644
									5260
									4952
									4924
									4802
									4548
									5183
									4723
									5149
									4637
									6561
									3843
									4028
									6869
									4482
									4788
									4886
									5016
									4345
									7547
									6167
									6847
									7601
									4792
									5051
									5065
									9358
									5523
									4688
									6037
									6477
									4566
									4673
									4689
									4496
									4138
									4647
									4848
									4876
									4758
									3560
									4773
									5590
									5049
									4244
[truncated: 9 more columns]
