# Supplementary material for: Membrane-mediated dimerization potentiates PIP5K lipid kinase activity
Source: eLife. 2022 Aug 17;11:e73747. doi: 10.7554/eLife.73747 (PMC9470164; doi:10.7554/eLife.73747)
Supplement: Figure 1—source data 1. [file elife-73747-fig1-data1.xlsx]

## Sheet: Figure 1C
Figure 1C
pixel position	mNG-4KB intensity	mNG-5KB intensity		intensity is in A.U.
0	1928	2352		1 pixel = 0.107 µm
1	1519	2074.92
2	1965	2063.31
3	1821	2210.58
4	2058	1892.87
5	1668	1534.11
6	1587	1836.04
7	2001	2147.9
8	2400	1250.88
9	614	1500.68
10	1861	2508.5
11	2138	3559.22
12	1900	6279.12
13	3960	8013.78
14	8650	6699.77
15	14198	4576.21
16	11989	2523.63
17	7127	1738.94
18	2125	1932.49
19	2303	1655
20	1580	1766.72
21	2465	2058.3
22	2460	2090.91
23	2123	1910.31
24	1657	1278.71
25	1716	1986.87
26	1385	1154.43
27	2038	1651.33
28	1264	1906.9
29	1477	1891.88
30	2952	1590.59
31	3026	1580.28
32	7452	1836.38
33	13505	1821.71
34	12116	1662.37
35	10328	1708.86
36	5645	1181.99
37	1668	1525.53
38	2197	2128.57
39	3424	1869.84
40	1281	2640.12
41	2507	3835.52
42	2320	6523.87
43	1950.3	6886.35
44	2025.76	5345.12
45	1645.05	2693.41
46	2012.19	2954.98
47	1298.39	2127.19
48	2413.68	2165.79
49	2059.23	1456.36
50	1798.08	1259.62
51	1756.34	1710.27
52	2694.82	1760.9
53	6129.16	1675.4
54	9569.8	3126.86
55	13998.5	1805.22
56	10340.5	2013.88
57	5066.89	1330.94
58	2447.75	988.28
59	2291.91	1729.24
60	1470.25	2056.04
61	1355.57	2118.24
62	1593.21	1962
63	1580.54	1466.44
64	1430.72	1551.12
65	2123.5	1530.02
66	1550.18	2609.94
67	2050.11	743.9
68	2253.63	1859.08
69	2213.39	2004.86
70	2165.42	2831.08
71	2090.91	4952.28
72	2061.87	6230.28
73	2085.88	5847.94
74	2248.26	3717.26
75	1917.31	1952.02
76	1684.69	2237.42
77	1605.37	1287.2
78	1684.65	2264.48
79	1528.5	1886.3
80	2009.51	1584.18
81	2141.11	1464.87
82	1963.08	1513.23
83	1593.77	1774.69
84	2366.52	1715.87
85	1738.56	1634.32
86	1516.25	1857.74
87	2323.75	2187.64
88	1950.53	1711.99
89	1685.68	1800.41
90	1330.71	1579.55
91	2175.35	1213.79
92	1723.18	1849.72
93	2183.4	2028.74
94	2805.19	1958.82
95	2198.28	2171.61
96	2229.62	1871.12
97	2187.97	2736.72
98	2124.53	5324.89
99	2584.32	7339.77
100	4887.31	7747.05
101	9867.5	4849.6
102	13703.9	3353.43
103	12543.1	2155.03
104	7352.69	2045.36
105	3548.24	1935.96
106	2360.2	2063.02
107	1659	1601.54
108	1473.07	1452.51
109	1580.79	1459.17
110	1718.7	2008.81
111	2288.77	3033.16
112	1475.47	2461.59
113	1829.64	1278.74
114	2341.98	1332.73
115	3466.51	1475.27
116	6026.68	2083.05
117	8639.49	1991.08
118	10622.1	1635.76
119	11820.8	1716.72
120	10105.3	1809.92
121	5160.95	1524.64
122	2982.76	2235.99
123	2243.34	1474.7
124	1614.1	1418.64
125	1817.3	1983
