# Supplementary material for: Membrane-mediated dimerization potentiates PIP5K lipid kinase activity
Source: eLife. 2022 Aug 17;11:e73747. doi: 10.7554/eLife.73747 (PMC9470164; doi:10.7554/eLife.73747)
Supplement: Figure 1—source data 2. [file elife-73747-fig1-data2.xlsx]

## Sheet: Figure 1D
Figure 1D
time (sec)	mNG-4KB intensity	background intensity
0	14036	1140
0.1	7443	914
0.2	6299	1523
0.3	9732	2496
0.4	9692	2491
0.5	13363	1249
0.6	11932	1255
0.7	10302	1065
0.8	10526	1061
0.9	9574	938
1	8691	1047
1.1	9307	489
1.2	9958	708
1.3	11135	1741
1.4	10219	1283
1.5	9163	1361
1.6	8903	1073
1.7	8590	922
1.8	8786	898
1.9	10348	1633
2	10220	736
2.1	9916	775
2.2	11425	660
2.3	9190	908
2.4	8548	1666
2.5	8964	1783
2.6	8994	1065
2.7	9721	1242
2.8	7474	868
2.9	6525	991
3	8649	1252
3.1	9970	846
3.2	8180	1693
3.3	10021	1990
3.4	10201	754
3.5	8101	1586
3.6	8231	1567
3.7	8076	1817
3.8	9135	1367
3.9	9616	1059
4	8531	693
4.1	9818	881
4.2	11247	1444
4.3	9228	976
4.4	11688	957
4.5	8762	1690
4.6	8497	474
4.7	10900	1282
4.8	8020	1245
4.9	10842	566
5	9872	1210
5.1	9530	1774
5.2	12173	1174
5.3	10044	682
5.4	11900	1111
5.5	8195	1019
5.6	9260	1074
5.7	9219	1241
5.8	10370	810
5.9	8728	695
6	7807	1235
6.1	9689	1990
6.2	9333	1104
6.3	10310	1460
6.4	10118	793
6.5	10152	1100
6.6	11082	695
6.7	8418	1080
6.8	7322	794
6.9	9721	1562
7	11292	2270
7.1	8546	1420
7.2	10078	940
7.3	10299	729
7.4	4174	1585
7.5	4809	1833
7.6	5354	962
7.7	5051	1332
7.8	4344	735
7.9	5630	1062
8	6086	1969
8.1	5933	531
8.2	3825	2096
8.3	5870	1370
8.4	5723	754
8.5	6456	641
8.6	5340	1786
8.7	6300	1279
8.8	4459	537
8.9	4632	900
9	4232	603
9.1	6479	1126
9.2	4788	959
9.3	5436	1550
9.4	6497	1156
9.5	5456	572
9.6	4967	262
9.7	4761	1623
9.8	4559	1204
9.9	3731	1241
10	5062	1145
10.1	7650	681
10.2	3720	1017
10.3	4422	1917
10.4	4536	529
10.5	5477	279
10.6	5324	811
10.7	4089	712
10.8	3974	368
10.9	4108	801
11	4993	486
11.1	6369	1476
11.2	4461	1115
11.3	4870	824
11.4	4122	742
11.5	7336	930
11.6	4152	659
11.7	5144	1454
11.8	5828	556
11.9	3964	710
12	6007	672
12.1	5587	1470
12.2	5432	1059
12.3	4700	607
12.4	5628	1610
12.5	4917	1662
12.6	5924	893
12.7	4047	762
12.8	5332	790
12.9	4963	647
13	6581	1016
13.1	5796	1181
13.2	5084	668
13.3	3867	1311
13.4	4342	780
13.5	6102	1023
13.6	3992	2039
13.7	6747	945
13.8	5974	1093
13.9	4428	1108
14	4870	1713
14.1	4107	732
14.2	6107	724
14.3	6302	737
14.4	1033	1084
14.5	1118	1162
14.6	793	1101
14.7	1401	431
14.8	1615	771
14.9	1412	1096
15	1194	1036
15.1	1603	1087
15.2	1226	1537
15.3	786	1196
15.4	732	937
15.5	1027	1271
15.6	1660	673
15.7	818	1262
15.8	607	1703
15.9	1007	1282
16	770	1112
16.1	933	1243
16.2	200	685
16.3	1152	1871
16.4	1104	519
16.5	1155	415
16.6	1451	991
16.7	2378	329
16.8	1081	1332
16.9	620	2502
17	1014	734
17.1	1131	818
17.2	993	1491
17.3	1854	1096
17.4	580	788
17.5	1896	1204
17.6	1441	975
17.7	1228	1062
17.8	1211	776
17.9	1358	1162
18	986	801
18.1	640	918
18.2	1433	644
18.3	1537	1453
18.4	457	1568
18.5	794	1221
18.6	1128	442
18.7	687	1353
18.8	962	1036
18.9	1517	1425
19	1590	881
19.1	1242	1681
19.2	1051	1924
19.3	983	1159
19.4	1297	1341
19.5	1214	1689
19.6	894	836
19.7	1011	1649
19.8	1262	1213
19.9	1507	658
20	1022	1444
