# Supplementary material for: Membrane-mediated dimerization potentiates PIP5K lipid kinase activity
Source: eLife. 2022 Aug 17;11:e73747. doi: 10.7554/eLife.73747 (PMC9470164; doi:10.7554/eLife.73747)
Supplement: Figure 1—source data 3. [file elife-73747-fig1-data3.xlsx]

## Sheet: Figure 1E
Figure 1E
time (sec)	mNG-5KB intensity	background intensity
0	6898	1571
0.1	6118	1557
0.2	5840	956
0.3	5325	1174
0.4	4305	674
0.5	6799	1570
0.6	6157	1543
0.7	6542	1288
0.8	6772	1340
0.9	8094	1948
1	4655	1496
1.1	7038	1054
1.2	6090	1698
1.3	4876	870
1.4	6390	1038
1.5	5530	1564
1.6	7036	1285
1.7	5996	1279
1.8	4197	1669
1.9	5004	1076
2	5941	1088
2.1	4934	777
2.2	5764	1900
2.3	5398	393
2.4	5154	707
2.5	4649	1723
2.6	5668	1181
2.7	4308	867
2.8	5330	1655
2.9	5381	1466
3	4395	880
3.1	6117	830
3.2	6056	795
3.3	4471	1100
3.4	6378	615
3.5	5848	1753
3.6	5146	1029
3.7	6900	794
3.8	5641	1092
3.9	5213	1143
4	5683	984
4.1	5194	1182
4.2	6261	616
4.3	5613	659
4.4	5910	1290
4.5	5040	1347
4.6	6795	493
4.7	969	846
4.8	1197	1759
4.9	1247	579
5	819	1317
5.1	621	751
5.2	674	625
5.3	1143	1179
5.4	1502	1128
5.5	1367	1065
5.6	856	290
5.7	1562	612
5.8	361	1284
5.9	951	1131
6	1062	944
6.1	1072	1080
6.2	1503	580
6.3	579	2149
6.4	1785	850
6.5	918	1236
6.6	1574	872
6.7	634	1291
6.8	864	1970
6.9	967	591
7	1263	1008
7.1	1783	684
7.2	829	1138
7.3	1468	995
7.4	772	1909
7.5	1252	656
7.6	615	1115
7.7	419	2029
7.8	1576	1179
7.9	2807	1023
8	1137	1350
8.1	769	548
8.2	1697	1336
8.3	1348	1066
8.4	791	995
8.5	1359	1558
8.6	1223	1453
8.7	1107	1104
8.8	1181	1533
8.9	1211	951
9	918	469
9.1	474	833
9.2	785	839
9.3	982	621
9.4	677	814
9.5	1406	1231
9.6	820	2271
9.7	513	754
9.8	1208	944
9.9	1133	1330
10	1220	906
