# Supplementary material for: Membrane-mediated dimerization potentiates PIP5K lipid kinase activity
Source: eLife. 2022 Aug 17;11:e73747. doi: 10.7554/eLife.73747 (PMC9470164; doi:10.7554/eLife.73747)
Supplement: Figure 1—source data 4. [file elife-73747-fig1-data4.xlsx]

## Sheet: Figure 1F
Figure 1F
	Single mNG-PIP4KB particle intensities (raw data)												Frequency distributions of mNG-4KB molecular brightness
N =	3911	1422	1425	1469	1461	1422	1438	1438	1394	1332	1338
time =	0 sec	1 sec	2 sec	3 sec	4 sec	5 sec	6 sec	7 sec	8 sec	9 sec	10 sec		mNG-4KB intensity (bin center)	0 sec	1 sec	2 sec	3 sec	4 sec	5 sec	6 sec	7 sec	8 sec	9 sec	10 sec
	10808	12908	8179	8788	8842	8690	8402	8561	7418	4805	5351		0	0	0	0	0	0	0	0	0	0	0	0
	11166	10270	8611	8289	9643	8674	7984	8589	4260	4162	7225		400	0	0	0	0	0	0	0	0	0	0	0
	10176	9324	8807	6747	6760	3444	4893	4359	5292	2736	3856		800	0	0	0	0	0	0	0	0	0	0	0
	13449	8942	6602	5256	7989	7506	5865	7936	6670	7393	4630		1200	0	0	0	0	0	0.000703235	0	0	0	0.000750751	0
	11799	6496	8711	5032	4937	5342	4440	5103	2856	2624	6731		1600	0	0	0	0.00136147	0.00205339	0	0.00347705	0.00208623	0.0035868	0.00375375	0.00149477
	10538	6903	5391	6499	3457	2699	6916	5750	4678	4995	5767		2000	0	0.00140647	0.00280702	0.00408441	0.0054757	0.00632911	0.00139082	0.00556328	0.00573888	0.00375375	0.00896861
	9540	9191	7987	10921	9821	5146	6491	4912	10467	7152	5852		2400	0	0.00351617	0.00350877	0.00612662	0.00889802	0.0133615	0.00973574	0.0180807	0.0150646	0.024024	0.019432
	9412	9622	8931	6565	13094	10395	5175	9225	6327	5902	4786		2800	0	0.0021097	0.00210526	0.010211	0.00752909	0.0189873	0.0166898	0.0187761	0.0308465	0.027027	0.0179372
	10992	6667	9682	11820	5412	6518	4197	11183	4166	5923	8069		3200	0.00127845	0.00281294	0.00561404	0.00612662	0.0205339	0.02391	0.0340751	0.0229485	0.0416069	0.0382883	0.0336323
	13090	8516	5813	10338	10551	4727	9421	3820	6063	4761	8777		3600	0.0109946	0.00421941	0.0126316	0.0183799	0.0294319	0.0379747	0.0319889	0.04242	0.0552367	0.0457958	0.058296
	11795	11051	11068	14543	5481	9601	10396	5612	4442	4170	5738		4000	0.0132958	0.00843882	0.0175439	0.0272294	0.0376454	0.0464135	0.054242	0.0611961	0.061693	0.0668168	0.0597907
	11866	9597	9429	5913	9205	15754	4112	4853	8015	10819	7296		4400	0.0163641	0.00914205	0.0245614	0.0490129	0.0568104	0.0682138	0.0702364	0.0744089	0.0753228	0.0923423	0.0792227
	4369	13737	10867	9596	13660	3515	5608	8437	5593	4664	6742		4800	0.0153413	0.0196906	0.0392982	0.0517359	0.0657084	0.068917	0.0806676	0.0848401	0.0753228	0.0833333	0.0881913
	6966	10498	4708	12638	4800	6964	5154	5413	9816	5948	4335		5200	0.0145743	0.0232068	0.0385965	0.0558203	0.063655	0.0787623	0.0764951	0.0785814	0.0832138	0.0788288	0.083707
	5050	10412	11769	5252	8088	6724	8489	4851	4801	4219	7167		5600	0.0166198	0.0267229	0.0442105	0.0490129	0.0691307	0.0646976	0.0876217	0.0757997	0.0932568	0.0945946	0.0807175
	13242	4995	10599	10171	3814	6431	5943	9525	4416	9609	8442		6000	0.0178982	0.021097	0.042807	0.0558203	0.0616016	0.0745429	0.0771905	0.0737135	0.0667145	0.0720721	0.0732436
	9799	6783	6321	5996	8377	9163	3182	5648	11699	5944	7944		6400	0.0199437	0.0295359	0.0449123	0.0456093	0.0595483	0.0590717	0.0646732	0.0764951	0.0602582	0.0570571	0.0515695
	12264	14432	5576	5773	13379	2116	13873	6488	5057	6242	4605		6800	0.0166198	0.0295359	0.0435088	0.0503744	0.0554415	0.0485232	0.0605007	0.0577191	0.0581062	0.0457958	0.0612855
	14333	10623	5251	9341	9675	11733	10664	9678	6005	7386	4806		7200	0.0171312	0.035865	0.0385965	0.0442478	0.0410678	0.0590717	0.0486787	0.0375522	0.0351506	0.042042	0.0373692
	10200	12137	4922	10424	5172	3487	5450	6503	6937	7010	5764		7600	0.0153413	0.0316456	0.0435088	0.0476515	0.0451745	0.0407876	0.0340751	0.0326843	0.0322812	0.0285285	0.0411061
	5757	11604	12523	4005	4223	6850	12509	6113	8127	6731	8550		8000	0.0250575	0.0386779	0.034386	0.0469707	0.0376454	0.0393812	0.0333797	0.0312935	0.0301291	0.027027	0.0231689
	10498	9914	10174	9881	11951	11624	6782	7521	6675	6880	5966		8400	0.0258246	0.0365682	0.0435088	0.036079	0.0431211	0.0379747	0.0312935	0.0361613	0.0272597	0.0225225	0.0328849
	5649	11685	8249	9894	6416	4834	5044	2254	5710	9144	5353		8800	0.0332396	0.035865	0.0484211	0.0306331	0.0485969	0.02391	0.0264256	0.0354659	0.0251076	0.0217718	0.0209268
	5173	11774	11215	5374	10646	3123	8476	14313	8975	12700	5579		9200	0.0462797	0.0485232	0.0463158	0.0347175	0.0308008	0.0267229	0.027121	0.0222531	0.0164993	0.0187688	0.0239163
	7274	3981	9629	7520	5714	9025	4605	6916	8041	4791	4369		9600	0.0496037	0.0527426	0.0449123	0.0401634	0.0383299	0.0309423	0.0201669	0.027121	0.0215208	0.018018	0.019432
	10958	12462	12867	5045	9721	5712	7411	11731	12098	3989	3917		10000	0.0588085	0.0541491	0.0357895	0.0442478	0.0253251	0.0189873	0.0208623	0.015299	0.0164993	0.0135135	0.0239163
	4508	11529	7305	10487	4989	4658	12190	7897	5501	5708	4958		10400	0.0698031	0.0492264	0.0484211	0.0442478	0.0225873	0.0140647	0.0180807	0.015299	0.0200861	0.018018	0.0112108
	5175	14731	9874	6179	5463	7772	5111	13888	8885	4583	4821		10800	0.0662235	0.0583685	0.0554386	0.0265487	0.019165	0.0175809	0.015299	0.0111266	0.00860832	0.0127628	0.0134529
	8015	13025	9679	7539	7658	5449	9843	3300	4954	8130	11154		11200	0.0593199	0.0576653	0.0329825	0.0292716	0.0219028	0.0189873	0.0132128	0.00904033	0.00573888	0.00600601	0.0127055
	11326	10259	10407	7670	11730	6153	5638	7118	5146	3847	7477		11600	0.0657121	0.045007	0.0322807	0.0224643	0.0198494	0.0140647	0.00764951	0.00973574	0.00860832	0.00900901	0.00298954
	12214	7683	10494	7286	5177	13738	7133	5137	10094	8959	3932		12000	0.0636666	0.0457103	0.034386	0.0190606	0.0130048	0.0105485	0.00556328	0.00347705	0.0071736	0.0105105	0.00523169
	6406	16105	8067	6689	6166	7811	10072	7993	7646	5674	5508		12400	0.049348	0.0372714	0.0294737	0.0211028	0.00958248	0.011955	0.00764951	0.00625869	0.00430416	0.00525526	0.00597907
	10880	13554	8256	10756	8846	9103	5773	10091	5746	4898	9025		12800	0.0421887	0.0316456	0.0182456	0.0217835	0.00752909	0.00562588	0.00764951	0.00347705	0.00286944	0.0045045	0.00373692
	4991	10500	13282	7138	6324	4683	4493	3179	12632	4351	7479		13200	0.0401432	0.0302391	0.0217544	0.0156569	0.00616016	0.00632911	0.00208623	0.00208623	0.00071736	0.003003	0.00298954
	9879	15692	8586	5552	4074	7153	5194	6594	4546	5553	5783		13600	0.0311941	0.0274262	0.0154386	0.0108918	0.00889802	0.0021097	0.00139082	0.00208623	0.00286944	0.00225225	0.000747384
	4275	10558	10943	13808	14095	14077	5071	12348	5692	5169	5251		14000	0.0268474	0.0196906	0.0077193	0.00884956	0.00684463	0.00421941	0.00347705	0.00278164	0.00143472	0.000750751	0.000747384
	10999	12245	8492	14580	15528	10967	5960	11463	3782	6972	6024		14400	0.0199437	0.0175809	0.0077193	0.00544588	0.00205339	0.000703235	0.00347705	0.00278164	0.00143472	0.0015015	0
	13438	15132	6482	9944	7557	6252	9740	6524	4966	10815	4687		14800	0.0138072	0.0105485	0.00912281	0.00476515	0.00136893	0.0021097	0.00069541	0.00139082	0.00286944	0	0
	11619	15039	13793	6960	10728	3720	8349	4351	4686	5881	4575		15200	0.00869343	0.0161744	0.0077193	0.00544588	0.00342231	0.00140647	0.00208623	0	0.00071736	0	0
	8755	21659	12967	11138	6629	9927	6212	4459	6960	3376	6322		15600	0.00562516	0.00773558	0.00210526	0.000680735	0.00205339	0.000703235	0	0	0.00071736	0	0
	4101	10016	10896	6284	9716	5353	12295	5191	10249	7479	9540		16000	0.00536947	0.00914205	0.00631579	0.00136147	0.000684463	0.000703235	0	0	0	0	0
	10607	12673	7868	9117	10633	4820	9938	5817	6864	7869	6072		16400	0.00281258	0.00562588	0.00210526	0.000680735	0	0.000703235	0	0	0.00071736	0	0
	11742	9388	7529	6295	12362	7284	6257	5359	3776	11028	7294		16800	0.00255689	0.00492264	0.000701754	0.00136147	0.000684463	0	0.00069541	0	0	0	0
	9431	8267	5206	3551	4600	13211	6281	3441	6260	8456	5155		17200	0.00153413	0.00562588	0.00421053	0.000680735	0	0	0	0	0	0	0
	13593	12161	13612	7195	3031	4944	4524	4417	3395	6277	2630		17600	0.00306827	0	0.000701754	0.000680735	0	0	0	0	0	0	0
	10828	12436	5519	4687	13278	4761	3374	8363	4540	4066	2357		18000	0.00204551	0.0021097	0	0	0.000684463	0	0	0	0.00071736	0	0
	10860	12992	5157	11508	14175	12748	4521	6984	9644	3166	5548		18400	0.000767067	0.000703235	0.000701754	0	0	0	0	0	0	0	0
	13391	10509	8173	4623	4927	10505	3964	4070	5931	6845	6741		18800	0.000767067	0.000703235	0.00140351	0.000680735	0	0	0	0	0	0	0
	12159	11173	10500	12408	9637	12547	4884	5152	4036	4509	5801		19200	0.000255689	0	0.00140351	0	0	0	0	0	0	0	0
	11487	13017	11381	13040	5990	10693	4809	5661	7316	2401	5885		19600	0.000511378	0	0	0.000680735	0	0	0	0	0	0	0
	13192	15497	5234	7276	10551	3183	8548	7197	4255	3724	6790		20000	0	0	0.00140351	0.000680735	0	0	0	0	0	0	0
	9745	12294	13332	15133	12619	7610	12075	4958	6461	3522	6050		20400	0.000255689	0	0	0	0	0	0	0	0	0	0
	12812	9384	13449	6573	11729	5059	2893	11526	4759	11815	3735		20800	0	0.000703235	0.000701754	0.000680735	0	0	0	0	0	0	0
	9570	15379	11986	8802	4686	5255	5760	9902	4244	5992	3942		21200	0.000255689	0	0	0	0	0	0	0	0	0	0
	8098	15136	6672	6498	14028	9656	6923	8533	3282	8698	6012		21600	0.000511378	0.000703235	0	0	0	0	0	0	0	0	0
	10868	12316	13295	8144	13426	4634	5817	6389	2591	4405	5166		22000	0	0	0	0	0	0	0	0	0	0	0
	14017	15302	10799	12453	10437	11195	5414	5868	11835	2212	6014		22400	0.000255689	0	0	0	0	0	0	0	0	0	0
	13464	10724	11147	9541	12428	11202	5508	8439	6495	2984	5511		22800	0	0	0	0.000680735	0	0	0	0	0	0	0
	8221	9909	14143	12282	5526	4733	7488	6099	7699	6104	4591		23200	0	0	0	0	0	0	0	0	0	0	0
	5339	17091	11758	11713	10090	5805	7118	6437	10026	4985	4212		23600	0.000511378	0	0	0	0	0	0	0	0	0	0
	10427	15114	17333	11327	6864	3964	6193	5352	4837	5532	6207		24000	0.000255689	0	0	0	0	0	0	0	0	0	0
	11485	10763	11255	8743	8296	6435	8415	3458	3596	4756	5823		24400	0	0	0	0	0	0	0	0	0	0	0
	14521	15085	11817	5685	10169	6377	8733	4372	7184	8176	3366		24800	0.000255689	0	0	0	0	0	0	0	0	0	0
	3508	16297	12386	10773	5273	4817	3848	9487	6638	4467	6125		25200	0	0	0	0	0	0	0	0	0	0	0
	11654	12300	7836	3442	8184	5420	6586	2679	5908	4353	5883		25600	0.000255689	0	0	0	0	0	0	0	0	0	0
	10738	14312	12636	9795	10475	4998	6786	8883	4393	4492	5109		26000	0	0	0	0	0	0	0	0	0	0	0
	12621	13345	8540	3488	4120	8100	4837	6446	8287	6035	5127		26400	0.000255689	0	0	0	0	0	0	0	0	0	0
	11850	9412	10611	4625	12205	3566	4898	8348	5699	10046	7257		26800	0	0	0	0	0	0	0	0	0	0	0
	13645	13490	4317	10287	5089	6495	3279	9349	3882	6896	4212		27200	0.000255689	0	0	0	0	0	0	0	0	0	0
	18979	12230	7375	3688	10646	8082	5033	3212	6279	7026	6473		27600	0	0	0	0	0	0	0	0	0	0	0
	9338	13478	11052	10989	10186	9310	8155	3940	5464	4901	4783		28000	0.000255689	0	0	0	0	0	0	0	0	0	0
	8796	13950	10710	11578	4733	10590	2611	9069	7398	9919	8406		28400	0	0	0	0	0	0	0	0	0	0	0
	12448	12937	8321	4624	5456	4866	5758	5289	7156	5638	5009		28800	0	0	0	0	0	0	0	0	0	0	0
	12644	15522	7941	12333	6149	7051	12787	5961	6484	6119	4484		29200	0	0	0	0	0	0	0	0	0	0	0
	15067	12579	4012	5785	8685	7015	2781	5605	3996	4154	12482		29600	0	0	0	0	0	0	0	0	0	0	0
	11936	13012	12131	8881	5160	6161	7297	5942	2961	7982	6213		30000	0	0	0	0	0	0	0	0	0	0	0
	5938	10946	4747	9420	4912	5077	8817	5311	7741	4803	4941		30400	0	0	0	0	0	0	0	0	0	0	0
	14620	5455	10242	4038	9328	11954	6573	4608	7473	6287	2466		30800	0	0	0	0	0	0	0	0	0	0	0
	10186	5713	7714	4060	10040	3084	10010	6721	5874	5160	6019		31200	0.000255689	0	0	0	0	0	0	0	0	0	0
	10387	13094	12560	7161	8477	7486	2521	6127	3333	5523	7299
	6680	10722	5242	10229	4364	4373	3141	7270	3502	4582	4354
	13325	8985	5670	5991	8977	7752	6750	6579	8264	4276	5495
	8696	12507	6701	7834	9413	2578	9014	4176	4431	5562	4524
	12410	16208	11044	9570	9253	3470	5524	4670	8451	4273	3524
	12244	15815	10879	11050	9484	11386	5683	8026	6956	3517	4946
	6328	8310	12406	10355	4604	9034	5468	6512	5503	5738	9802
	14169	8040	9737	8880	4447	6494	9643	6289	5347	4399	6122
	9156	9584	9432	8049	7187	8094	7401	5967	4237	6100	5815
	6355	9409	8256	5959	6660	8710	3525	5661	6070	3219	8377
	7113	9692	7528	8407	5658	7926	6801	5511	9414	7744	7460
	6114	9795	4008	6538	5430	3508	6451	4848	4097	5253	6537
	3776	10778	6427	9095	8113	8303	6211	6207	5817	2782	9458
	3921	10310	8687	13578	4380	7272	7942	10005	6141	5399	10056
	10804	7781	8114	9095	6399	7482	2924	7030	6819	5700	9167
	5662	10132	13522	5849	5575	6625	5886	7329	6492	4573	11901
	7060	9852	9038	14673	6191	5234	6323	8239	7183	8183	4916
	12267	11970	4745	5499	4985	5299	4570	7475	6488	6382	8612
	5995	9278	11736	9453	8152	7105	3657	8133	3347	6485	3454
	5723	11598	5775	4450	3015	11952	5760	3910	9661	5912	5597
	12041	13664	10489	5392	6006	5880	2878	5133	3139	4111	4670
	10853	9537	9162	16125	9512	4262	6700	6402	5949	3808	6778
	9891	10533	4644	9927	9377	5793	6578	8747	2960	3880	10411
	14211	7256	9201	5789	5831	6644	7140	4054	4580	4048	5999
	13289	11854	18677	4480	8423	3589	6357	5120	5192	9018	5909
	10984	7428	11427	4851	9368	6032	5702	3950	9144	6151	2234
	9980	10161	5706	4971	10124	6064	5442	6148	4978	6425	2225
	9059	10487	5589	4559	4486	4873	5587	13826	3758	4080	6451
	13951	13973	6678	8392	6137	6758	8383	7840	1837	6099	4217
	10359	15323	7007	4303	4819	2838	6135	4487	10982	7178	4269
	10138	7887	5407	11151	9365	5908	6484	5183	4157	7232	7597
	9688	11842	9740	3876	8646	9774	5169	3763	5462	6247	7069
	7294	9509	12876	3884	6814	6655	5743	3904	4321	3168	3839
	11418	5170	13664	9345	8135	2372	7652	10227	3420	10233	6674
	10410	11214	4914	7097	9601	7817	7098	4532	5819	7732	6465
	11788	11021	10752	7280	6613	8949	4470	5459	4285	9139	8001
	10773	14078	10690	9694	4653	7914	4879	3956	3582	8025	8255
	10362	11195	7223	9026	6758	3151	4792	6200	3634	10756	3759
	12778	7972	12503	13146	6705	5370	7111	6443	8907	5390	3270
	15643	9990	7933	2587	5266	6231	9240	6931	7367	8879	5971
	10555	10271	9771	8235	5250	4844	3606	6964	5188	2531	10600
	4887	8445	11183	8027	7477	7338	2250	6054	4876	4421	11819
	13284	11934	4991	10251	8154	4694	6151	2652	5705	3011	7417
	6334	6315	7231	8760	8836	9753	6102	7368	10535	6284	2397
	13159	8851	9137	4243	11241	4261	6572	8297	5775	5785	11285
	5324	8379	5918	7548	4817	8782	5266	4094	6667	10575	4295
	10717	5519	3234	8132	4803	7755	12376	5338	4855	9641	8338
	3843	7335	12137	8580	6544	4912	5153	4843	15255	4756	6761
	9181	5185	6596	9864	5126	8218	3911	3611	10059	4143	3179
	10635	7897	6467	5491	3791	8524	3344	9285	9124	6448	5042
	14059	10238	8943	18951	6896	8410	7971	6027	6802	6296	3660
	4855	6405	9055	14513	8862	6909	3215	7505	9826	11350	5610
	10038	6956	8325	9107	7842	4779	4212	3464	4499	5249	3259
	11492	14206	12007	5385	3568	5792	7231	6031	10702	4846	5092
	11634	9434	17155	6418	9560	5558	6996	6328	3313	4794	4554
	10901	13659	11359	9524	9527	9004	6246	6938	5906	2697	4735
	21402	14768	5812	5548	8651	3394	10655	6243	7023	4459	5171
	11626	12387	8830	9915	10490	7337	7262	7047	6771	1800	4007
	5973	12537	8705	6356	8013	6625	7346	8423	6240	6147	11184
	11670	6032	8347	5009	4002	4753	2249	6129	10585	2949	5478
	7412	6138	5855	6687	6018	10365	7336	6799	6996	4499	5279
	11343	17897	8855	7308	6102	8085	7248	3682	4342	5283	5749
	10816	8670	4918	10866	7283	12506	4848	5087	3981	5989	7688
	12426	10972	7244	7580	16724	6693	6877	8205	8950	5876	5397
	6310	13597	8554	10588	3578	7898	6636	6245	4285	6475	6900
	13160	7332	10036	6359	8631	10119	11045	6332	5836	5244	10486
	10184	11640	7456	10297	8763	7381	8414	6083	6377	5581	8497
	11871	12367	9283	6611	5602	5111	6411	4561	1871	4843	6857
	10571	13729	9101	7028	7052	7353	7539	6097	6530	4355	4684
	8712	13025	14097	5681	8211	6151	3858	3723	8857	5104	4771
	7225	8068	8290	5712	6329	4411	5860	7946	4894	10118	6834
	6336	13930	11019	7977	5075	4232	4031	11492	4477	6957	9609
	4421	12097	9843	9809	4254	9001	4916	5074	6163	4912	7302
	6051	11787	5456	5736	3708	6616	5182	8318	6575	5659	2370
	6997	10494	8126	9762	12448	4409	8876	4459	8082	6169	5078
	11496	14457	4582	9870	9751	11917	9940	7469	4509	5893	4459
	6036	13977	12429	9695	4680	13043	4738	5594	8714	7402	5110
	10378	11063	11755	7129	10359	4447	6319	3637	5116	10899	5141
	11698	12249	8572	11059	5475	5555	6216	8315	4809	13625	10516
	9565	11790	7788	12454	11311	3870	8431	4662	9818	4103	4836
	3531	11535	10961	4796	16170	6498	5580	5402	7657	4924	3235
	11537	12567	14389	8610	5014	8889	6442	12214	5473	5263	4647
	11214	14308	7299	4287	7786	11167	12086	4829	6886	5894	6697
	11923	11098	10265	7126	5694	4197	10889	4904	6758	9283	7517
	12383	12428	9264	8529	6952	9876	5408	7487	7324	3977	4317
	10316	6523	10368	11774	9011	11497	7263	7019	6289	5541	4228
	9379	13035	11179	7188	8936	6200	5718	9390	8928	6285	9797
	7439	8217	6068	11982	4472	5330	5848	6637	9398	6008	6156
	8132	5390	8804	12283	10743	11546	6873	10278	11130	5413	3431
	10320	10073	10801	7263	5664	5079	4614	7283	4946	3689	6259
	8502	14911	8075	10206	10333	4883	4466	12296	6962	5646	9392
	10611	11772	8963	5220	4986	7159	14830	3914	3559	11559	5359
	3749	9996	7938	9803	12064	7495	3992	5025	3319	6821	6726
	6412	17361	7108	5333	6431	6903	8239	5563	7929	3716	4142
	4126	15001	12804	6027	3037	14028	5398	4918	6406	5611	2439
	4259	12826	11362	7289	10642	6806	7732	11722	5423	2970	5972
	13972	11740	10749	12023	5620	2995	14469	5506	6870	8409	5204
	10813	11441	8554	6737	5824	3306	4725	5508	5779	7634	5340
	15406	16057	6350	10498	6569	8873	4438	12719	3636	5224	4062
	11653	12430	7049	6749	5422	14546	5083	7416	1786	3734	7697
	10739	14799	12155	7528	5937	10601	5536	5247	3625	4276	8660
	10908	16922	5644	10734	10641	4325	4646	4561	4467	6865	5718
	11517	13232	4271	11338	11665	6083	10208	3853	5099	4377	6498
	11462	16028	6433	11725	6561	3743	5974	5009	10438	4219	6337
	15645	15689	15911	6620	5472	5440	5595	7042	8185	4241	4816
	13069	14255	12117	11540	5898	14752	12748	5411	3184	5441	6080
	7074	12400	4489	9217	6443	9468	12504	2954	5305	10797	5514
	13631	11287	10728	9596	13071	4645	5111	4673	4009	5980	5579
	10555	16261	9661	5629	11232	5346	5827	11037	3709	6449	7921
	11403	8753	13382	2213	4369	12271	3380	5843	8435	4521	5515
	13515	12740	15872	9073	3959	9868	4773	5341	7064	3051	5967
	14602	15617	3833	4245	11848	7663	5144	3354	6153	4347	6775
	11275	11775	11128	12375	11352	12532	6100	4763	3988	4399	3620
	5796	12311	11114	6577	4380	4547	3873	4688	8994	7520	4667
	9259	11299	15041	12516	7337	5577	5448	6177	3202	6113	8822
	16015	10898	15909	12519	5355	5182	7752	7983	7449	5639	3502
	3923	10730	10781	10291	11081	5191	10833	6354	4660	6767	6118
	12891	10690	14045	9654	13711	9783	6823	10680	3191	5196	8445
	7649	14370	11995	4788	7365	6155	5500	10229	3406	4711	5082
	9728	7105	15624	12915	8936	10764	7359	3699	2602	2250	5914
	5750	10725	8789	7437	13896	9528	7326	6351	9132	5838	5820
	10797	12007	5029	10134	8258	5534	4981	6194	8417	6076	10141
	5183	11685	14581	14099	11973	4448	5185	5466	6915	6210	7466
	16221	5430	7700	11066	11808	3684	8513	6478	10661	7190	4945
	12053	7938	14954	12605	4035	7250	8447	2906	4914	4191	3813
	13279	12212	4192	12911	11925	9311	4811	4067	3739	4453	6642
	3609	9716	6268	15210	5482	2557	9587	8043	8698	6491	10669
	10591	11353	10604	13367	5078	5747	10208	4149	6345	7436	4179
	6591	9007	10475	5698	7708	4252	4999	9638	3317	4866	5674
	13543	13077	8638	13568	5020	3761	7743	6875	5219	4526	3731
	13148	8156	7230	4693	9324	6857	6474	6666	8461	8710	3800
	14731	9757	5266	13339	9304	2953	4816	9769	5904	3975	3516
	10907	7650	13934	6950	4387	9230	4565	3490	1625	7361	9358
	9635	7594	4786	5195	9999	8048	4208	3086	4124	8549	6981
	9964	6942	11759	10768	3681	10646	4394	6075	4175	6631	6539
	13247	9649	9336	3463	6937	6512	7309	3848	5433	3706	8672
	12574	11539	10957	11364	8769	5790	3270	4658	5522	7032	4571
	9399	11070	6188	9168	7544	7395	6922	5681	6258	4304	5994
	6201	8240	6132	3894	5529	4782	9988	5757	5435	4588	13475
	6528	7655	8436	8688	5427	5597	3328	4490	4591	2850	6956
	9162	6229	12213	4995	8739	5378	6307	3537	7065	6591	11081
	4611	11370	10397	12290	4198	9667	5048	3458	8132	6910	10060
	8618	10657	8946	9476	4282	2219	8183	5868	7096	5030	5717
	11670	11100	11946	5370	7794	5816	10027	7373	5039	6179	9245
	14915	11421	9164	5356	8643	3881	3736	7279	4120	11957	2414
	11222	12881	11872	9893	9979	6993	3113	5859	7608	4811	5290
	11228	12640	3183	2179	5338	3152	7385	4137	4769	2491	4643
	4953	11243	5602	6187	7380	3966	7806	4161	9574	2515	6912
	11200	5234	8994	13257	5045	9768	4188	8482	6876	5851	9815
	14859	9765	8107	13414	9718	9209	7095	7895	6221	4835	8784
	11979	6966	11495	8874	11019	5907	6665	6778	8003	7168	3352
	12088	9121	10172	11843	6486	7556	9042	6379	4217	4916	3531
	10574	9385	12415	6468	4333	7767	6786	5338	3879	3349	2932
	31189	12556	5727	6034	8550	10914	5946	6677	10202	4839	4787
	10242	11977	9200	7530	5160	3257	4590	4407	4362	3640	4517
	6038	10405	7196	6189	4277	9205	6701	9049	6265	4916	7862
	9348	10631	11422	12329	4304	7969	4562	8431	7248	3565	6215
	10317	9001	9989	10138	6982	7030	6761	6284	7516	4047	10475
	9985	6832	4792	9805	3870	9393	5712	9081	5258	9933	4016
	13036	8167	9084	4651	4972	5375	5558	8940	4144	7153	6089
	10943	9923	19924	10094	5292	6272	7924	7545	3072	4619	5143
	12013	13013	9401	6606	5133	10071	5826	7299	10453	5655	7164
	6365	11429	5408	10256	3664	4181	5229	3194	6155	6519	8630
	10537	6806	9529	3767	8548	5014	5868	5498	2820	7368	3738
	12382	10289	2510	5101	5001	7213	6005	4668	2805	6946	6112
	10636	8868	6568	12634	10277	5109	8090	8346	6586	7183	4971
	9881	8854	5492	10589	11019	6475	6088	4926	4529	4403	12001
	7194	7496	8964	3289	8239	6002	6677	5622	6904	8317	10432
	6684	5171	12029	6507	6049	4735	8111	4358	5990	9780	3021
	11604	10554	10603	5462	7232	6629	5708	5999	1719	9199	1942
	6201	7298	7271	5776	7089	5897	4224	10786	9921	5607	7277
	12701	8187	9127	4168	7800	4447	8320	8889	5438	9900	9604
	13322	6710	7446	8009	4182	7055	5534	5420	6180	5315	9127
	12076	7384	6287	5904	3392	10807	6750	5111	4409	6718	3364
	6016	9447	17248	7579	6511	6258	4905	2661	5768	3688	4315
	11231	9475	9866	3775	9492	4029	7751	4397	7331	4906	3540
	11072	9477	8619	6148	11069	7346	11303	10598	4766	4593	4308
	11736	5679	12557	6209	6563	9139	6831	5651	4285	4576	6136
	13404	11956	5555	7039	11492	8204	7087	6556	3696	7243	2748
	8601	11748	8897	9600	11431	2381	3642	3949	10516	10612	5543
	4100	10067	8965	8165	4143	5228	5940	7498	8345	7675	5314
	10520	12762	4728	10439	6626	6006	6068	6071	5590	2483	5391
	9500	11587	11267	9967	10577	6095	9464	6944	7065	5204	3932
	6907	12729	8886	3449	5653	6617	3292	7341	9543	3388	5139
	7244	5600	9738	10144	4365	4110	4392	6962	7132	4434	11588
	11719	4857	8692	11150	5376	9206	6281	1837	6069	4998	6396
	10048	17008	14688	7784	6021	5380	5432	12963	5154	12768	4971
	8124	8972	5603	8827	10890	6042	8567	9753	5892	5844	7423
	13974	12065	12531	8030	5463	8055	5981	6146	8036	7092	6280
	11540	10796	16045	5626	9015	5742	7110	3410	7711	5899	8968
	14201	10656	10127	8715	6600	3859	3114	4919	6944	5622	5151
	11822	13136	5182	8127	5294	7711	4858	2655	11169	4742	9918
	15942	11987	6860	8073	5471	6431	5433	8582	3006	3795	6436
	4756	13314	10007	6244	7431	7215	4485	7972	6367	2378	4180
	10015	10185	6779	17273	4081	3886	11401	6316	3904	7240	4425
	6154	10687	8249	13082	6255	4720	4374	3748	3688	2391	4988
	10937	12442	6455	11218	10368	6815	5053	5926	5035	4814	10865
	13806	12816	6631	4275	6396	8151	5982	5653	5339	4583	5243
	6331	13492	6391	6413	3764	3487	5198	6012	8163	6092	7382
	12345	6429	6739	4942	6453	6245	6652	4479	14869	5436	5600
	11608	13735	9432	2986	9222	6824	7058	6909	6478	6742	4737
	10697	12396	8447	10405	8867	3967	6422	8914	3691	2820	3696
	7935	11465	6633	6782	8681	11314	6839	5732	5379	4184	7587
	9330	15065	13796	5676	10883	11397	4115	5741	4701	5060	4791
	6949	15222	11956	4873	6023	10019	6759	4495	2595	5633	8922
	11602	11956	8498	4678	5960	6022	5989	4250	9171	13189	5735
	9570	13300	5963	8502	4806	7089	3818	5826	3598	4107	2512
	10666	11366	10862	9947	4876	8100	3561	7489	5448	4805	5511
	11460	8126	10912	10886	12755	8951	5897	8395	5581	4587	9286
	9322	13368	8180	7829	4243	9615	1922	9182	2978	6772	6044
	10603	5010	4674	2930	8752	7359	8916	8244	5982	8563	5305
	8414	13497	9013	3774	7671	3361	8167	6070	12551	7195	4116
	4493	6620	4742	8062	6323	8512	4859	7248	6408	12226	7830
	6499	3772	11921	8623	1675	3944	5639	4829	3626	11693	6686
	8604	9492	12083	7696	8893	9924	6916	4447	5039	5161	6666
	10648	10542	15152	7288	8545	2712	5358	7889	6112	5450	9258
	13706	11588	8688	5214	5009	3521	3320	10434	7767	5670	3030
	12750	7393	12154	6930	5426	9561	6310	4931	4276	5169	8075
	10923	12974	12497	10215	4811	13115	6940	6576	6181	7786	5745
	9564	14842	6251	6621	3609	4281	7942	4943	5067	5170	3376
	9949	14355	9949	12760	10435	6079	12330	8853	5242	5237	5206
	7230	11336	10891	10873	10232	4072	4165	4405	12737	5325	4920
	10299	9897	11716	12188	11851	8881	5916	6938	5442	5813	5121
	5019	13907	12702	4308	7471	7343	3691	8311	5465	3773	4576
	6720	9455	6771	10131	9635	11407	10497	6044	5763	4715	5804
	10442	12422	8649	11336	15646	4869	5751	4525	5718	6207	5954
	8153	13242	10454	5126	4152	8413	5947	13151	5019	12907	4934
	10081	13319	5166	6149	5904	9139	8650	5381	5999	5083	5749
	11426	14556	11440	5072	3879	6252	9892	5226	12029	2733	5346
	11672	15006	6820	4369	6896	4930	5074	8699	7265	6325	4281
	9555	16354	6567	12777	11817	13680	9875	5025	14896	4286	4946
	11864	11542	11132	10273	10554	8645	6686	5914	4588	9216	8517
	10165	14298	13581	4890	6719	5439	6106	6605	4683	7628	6922
	8171	11824	10385	10853	10485	7365	6801	9613	5601	3848	7123
	11232	7520	7783	12660	5765	6405	5335	9432	6888	4525	5357
	12016	10839	12206	5915	8804	3984	4630	12337	5589	5516	6413
	11576	9659	5243	8918	4798	10924	10051	3403	5823	5545	6383
	14684	13338	14058	6143	7565	6041	4080	3828	4015	5088	5161
	12021	10830	6929	10148	4644	9318	7758	5121	4538	3079	6629
	11528	9819	5790	4385	3916	7567	5931	6798	4335	5242	6446
	12334	13772	5810	7566	8673	12581	10289	9512	4595	3123	4285
	13388	12420	9635	7825	4539	7511	11357	5846	5998	11121	5431
	11095	9508	7762	9712	4893	5003	4804	4108	5188	5438	3450
	13902	13428	4626	6199	8915	6012	5015	8929	12827	9461	6655
	16417	5578	11101	10810	4833	5669	6766	5901	5076	6189	7515
	6867	11759	11741	11462	5902	6335	4004	6094	5704	2527	5552
	12145	11913	14277	7280	18163	11158	5287	4456	2529	4153	11055
	13166	15028	12264	10727	7696	10050	9402	4206	4971	3177	2739
	14026	7552	6318	12066	6016	5563	5602	5621	9160	7328	5603
	10095	5130	12621	11714	7359	5245	7333	4962	7643	5174	4986
	10268	10229	12539	12866	5164	11039	12968	3238	4656	6313	6795
	11765	8073	13185	5395	6973	9952	10046	8960	5801	7170	7363
	4374	5343	16382	9802	9606	7497	5973	6319	7801	4618	4479
	8389	12229	8835	5490	7588	8254	5090	6237	5125	4221	4354
	6608	12492	13281	6986	4246	4370	3976	4909	5535	4192	3617
	10279	11622	15040	3562	5159	5340	4562	5806	3705	7462	4771
	10579	6600	13426	11531	13823	4500	5253	5203	3056	7001	3671
	13968	7487	10329	4765	11376	5560	5294	5446	4453	6567	12239
	9871	9656	5317	14001	3716	9276	2757	8713	4332	5917	6681
	11119	11637	13623	10490	6621	4096	5821	7456	10349	5519	7364
	11339	13544	8041	13476	6134	9933	9104	8714	6311	6739	8872
	12360	12788	10499	12473	9413	9274	10247	8780	6955	9425	4841
	7904	9201	4597	4310	8967	4664	5615	4581	9939	4587	4882
	9309	7644	5084	6492	10330	7662	5272	4509	2784	4621	10333
	11915	5812	12406	4012	5344	4273	7554	5757	2167	4659	11393
	12466	6112	10377	14404	11599	5468	6867	5682	6872	8204	9745
	5786	9142	11567	16770	10652	8954	7007	4047	6740	5169	11814
	12502	14551	10492	10815	12408	5936	5640	2304	4235	7939	2581
	8203	13983	6193	13375	13298	4224	6969	6190	5897	7193	11374
	7000	8550	13557	13585	3203	5115	8673	7572	7129	7163	2044
	10127	15493	5426	14501	12233	4667	12663	2994	5872	5209	3857
	13600	7973	11928	10937	6011	8833	12005	9218	4437	6189	4260
	8371	7705	9285	4028	5670	2478	4259	5909	6435	6674	6868
	7096	8000	6051	13601	10124	8222	6848	9141	4853	4327	9739
	14342	10909	5368	6650	3722	9076	5437	9057	6993	3584	7105
	3480	4196	6529	10506	7833	11608	6522	2470	7903	5259	3429
	11391	7055	5816	7113	10215	9136	5112	3235	6464	4265	4929
	13145	9379	10535	5939	3747	5579	3076	6638	5887	7389	4149
	7207	10188	9886	10715	11482	5750	5108	5278	7828	3743	2420
	11485	15938	9506	6672	3811	4877	11209	5269	8355	10486	3879
	11992	9368	10773	11321	4855	4834	2910	4878	6071	4329	7324
	13927	11767	8115	9408	6919	5940	3771	6487	3962	4243	5296
	10364	9151	9953	4563	5975	9768	6255	5484	4525	3859	7433
	6049	7142	10063	9858	5737	3077	4368	4869	7514	4885	3457
	11601	9742	4113	3822	6774	5903	7581	5739	3025	5045	6224
	11147	10353	10428	11943	8639	3092	4282	6219	7528	9461	7626
	13600	6043	6807	7627	5187	6623	8069	5801	7778	9869	7515
	13209	8673	8800	4439	6210	3845	8877	8221	5870	5622	8519
	11339	8253	9901	7403	9644	4739	2377	7000	4716	5365	2928
	5258	7885	8653	7755	15124	5684	4618	5014	3500	4865	4638
	14180	10840	5601	1787	9318	7667	8828	4134	4733	3435	6018
	4965	7936	12754	9579	5326	5884	8145	9662	8265	4364	10148
	5700	12049	8464	10390	6862	8068	5421	6266	4088	4447	10800
	12933	8604	9162	13689	5089	7272	5739	5159	5016	11915	4546
	13694	8230	9177	8058	10731	7608	7510	6663	5707	6693	3077
	14135	8015	4425	12454	8258	2967	10630	5439	5852	5112	7453
	7855	7234	10048	7587	3496	11776	6113	4068	4772	4709	3375
	10642	8205	19111	3701	4587	8520	4638	4902	4765	3444	8375
	7407	5904	9966	8256	7924	5195	4541	8518	3648	7973	8077
	9843	7473	7551	8972	6271	10501	6043	7228	10245	4795	5517
	10311	11386	8468	10356	5437	7706	8067	5788	5720	7222	3461
	8645	11122	4667	10530	5291	6187	4664	7755	3369	3174	3627
	10565	7716	5813	5923	7868	12162	4799	7325	3626	10504	2951
	3521	10796	6308	10318	3797	3900	5905	7313	4528	10263	2004
	13913	10926	6417	5289	6720	5222	4846	5901	5047	10522	5369
	4159	9329	12192	9236	5387	7647	4397	5020	9341	3736	6723
	12946	5512	10120	3686	6925	6051	6396	2822	6992	10237	2372
	5764	12173	4198	5806	4434	6791	7060	2047	9605	5774	5624
	8061	12068	9748	10286	6502	5120	6769	9545	6599	8892	4446
	10597	8146	9152	9202	5056	4279	7630	3320	5618	2660	5294
	12313	5005	7794	3204	8314	5732	5838	5553	5090	4511	4473
	11884	16162	14910	5811	9926	6380	6958	4165	3074	2787	4965
	9348	9072	12847	4948	5799	5682	5174	7513	9529	6124	10271
	6583	15082	10399	6665	6627	10285	6176	9740	5916	12138	6949
	13628	13687	7141	4957	8743	7070	8903	7396	3438	7103	6106
	12708	10013	4079	8389	7576	2422	5039	6442	4394	3390	5390
	9103	13663	8479	2545	10164	7341	7147	5970	14391	2716	5515
	10190	13592	10926	4806	2730	6435	5293	3836	3637	4469	6711
	8334	10685	6956	4688	5466	10560	6587	2984	6363	4703	5917
	7569	11834	9239	9683	11263	1924	10728	10286	5363	5173	14025
	3970	10915	14451	8884	7837	4828	5701	5001	5855	13892	5603
	8512	11057	5485	8227	7141	4684	5725	4427	9778	8399	6660
	10513	10433	8328	8986	7742	5733	3169	5000	6272	3852	4319
	4479	12517	8776	5715	9370	6846	5742	5758	6657	5489	3700
	10213	6463	12147	8898	6721	5588	5131	7949	4907	5964	8972
	11062	6701	6200	12674	7068	16581	8192	5616	11618	6813	5072
	9786	15756	12173	2937	9551	4483	3969	6037	8433	7834	5066
	12396	10987	13420	7032	3490	8592	3912	2200	8497	4595	6743
	9529	10852	8873	10260	4767	9562	5018	9260	7665	2939	5267
	6916	7951	4677	8287	5300	5654	5711	8539	11318	2243	4440
	11355	9929	6700	9291	8839	2924	10165	3562	5904	5930	6185
	3564	13140	10826	4575	7461	7094	7230	3187	9725	2175	6008
	10814	14001	9091	7459	3956	7294	9380	4337	4061	5620	10989
	12107	10754	6147	5657	8646	6793	6928	4709	5224	5690	6430
	6320	8701	7311	9905	6975	4466	5632	9377	5494	3946	3460
	11212	12516	5370	10820	6812	4130	5051	5471	5769	4888	6175
	10057	4849	8427	7106	4974	5554	5486	7989	5783	7822	11375
	16644	12190	6864	19953	4633	9383	10124	3607	11697	5524	6967
	7163	6980	7596	11553	6661	4271	4198	9035	7887	4026	4363
	5684	4627	10907	9597	5869	5384	4920	7357	3595	3217	3899
	16478	7922	9493	6802	9588	5856	5402	8130	4812	9929	5802
	11726	11302	4949	5351	8556	7433	6017	3497	7014	5184	3445
	10926	11098	11407	11175	2377	11773	4394	6346	6406	6948	3395
	12352	9349	10704	4509	6186	11003	7402	8104	3266	8402	9769
	10921	13671	15115	9604	8976	13090	7118	8319	3046	4241	10997
	12410	13641	5848	5958	7085	6221	10790	6220	3635	9113	4057
	8010	14229	9961	4599	7917	5472	2345	3423	6127	5809	8205
	3584	16823	10986	5413	11462	3234	8181	10924	3076	11713	5544
	11514	13383	5831	6191	5117	3004	5322	8196	1874	12096	3445
	9870	16188	3981	12594	6306	10560	3566	10040	5164	5286	6449
	10526	13385	7896	7845	8696	7748	4021	6786	10359	7545	4125
	10401	18770	5717	8270	4819	5149	5319	10039	5373	5076	7834
	10765	16906	8740	5464	9348	6128	4158	4062	4956	7989	5473
	10947	12128	12297	1872	4980	7299	1599	4747	7961	7552	5499
	6013	12183	9523	5022	9159	7991	10772	2750	4584	8322	5733
	9630	11844	6018	6694	6694	13858	8909	4881	8016	4132	5238
	11429	13377	11000	7420	3475	5775	5494	8990	5064	4289	3735
	9938	8210	10371	9890	4285	15857	8180	8620	11852	4298	5231
	14330	12801	5521	5632	2678	14806	5051	6214	4541	7873	4201
	12484	14548	13121	7247	6040	5737	6478	6340	5761	5807	6668
	11234	6501	13181	4806	9073	6752	3578	3509	7291	10123	7449
	12037	14969	13260	7826	8573	4326	5447	6973	6062	5401	6392
	13581	6996	10616	13680	6064	4161	5694	10914	7491	3821	6172
	10329	8711	5250	5688	6485	8140	7071	6417	6549	7023	3231
	8476	10451	10273	12187	4529	12494	8912	4615	5680	4194	5941
	10123	12701	9595	8508	3363	6301	7187	6993	6502	10561	6181
	10750	10905	8947	10519	5255	8219	5531	5441	5633	10104	3225
	10910	12090	12364	6981	10922	13085	6519	8730	11986	5460	5785
	9846	8589	8297	9505	11466	5163	9609	4881	7402	5559	6564
	13034	15267	7120	16136	5922	4168	5530	3492	15413	3724	3591
	10255	4481	10975	4740	9094	8578	7252	10531	5234	4992	4772
	12752	12514	10883	4281	14301	5942	7676	6846	6901	4239	6403
	10252	12292	12299	5587	5071	4863	10502	4120	2275	3378	6526
	4356	14690	10362	8487	6706	7272	5787	10321	5148	3758	5396
	12154	5322	10498	12722	5513	4656	9429	5831	5484	3857	8508
	14399	4440	5898	8083	6288	6474	4864	5784	3715	11554	3508
	11372	14003	12025	7317	11591	11029	5200	8067	5631	6068	4494
	13515	10080	5373	8592	8774	5913	7364	4748	3557	7522	3234
	8960	2483	4586	10530	5350	8558	5105	10353	4128	6103	5182
	9852	10517	8839	7059	9810	4287	5545	6001	3729	2803	8910
	9901	11125	11770	11274	6248	8937	14325	8255	5069	3150	5472
	9705	9821	9142	7248	8133	10811	3639	8886	5191	5675	6088
	12776	9235	6259	10413	5607	2775	11364	14023	4291	7059	4103
	8460	7479	9794	4651	10081	4914	6100	4673	8923	4368	6053
	12186	12646	11650	8043	5187	6095	5787	6703	7717	5268	4005
	9768	9963	13225	9230	7603	5864	16686	5586	2049	7029	9065
	5193	9283	19111	9178	10834	4348	3894	6264	4960	5335	3975
	9395	13671	5929	6006	6920	8015	5279	11217	7134	5077	4231
	5573	11297	12316	7960	5412	6641	5347	6456	4659	4424	8463
	6294	8201	10711	8830	7450	4938	4200	6146	8024	4419	3988
	13394	4701	12834	6143	5088	13182	12234	10680	7888	5892	2125
	8720	10609	14768	10146	7126	12509	6047	5263	6332	7044	10046
	7771	6475	10253	10473	11448	12089	8843	6876	4017	7206	9213
	9938	12297	16022	9046	7254	11485	13330	4844	6140	4792	7112
	11608	10499	13200	10525	8703	3828	11618	2141	4709	7603	4712
	11233	11229	12908	6541	5716	6993	5441	6529	5440	9751	4234
	7764	10616	11673	11554	9102	6718	3817	5547	3222	5927	9929
	10432	16237	5613	6457	13907	6365	4766	4763	3674	4074	2939
	12346	8362	17009	7269	14037	3428	7387	9250	3669	3831	5865
	9947	8212	9775	8479	5614	4295	5365	6743	3733	8261	4013
	13097	7038	12334	10266	2933	8253	5657	5115	6452	4683	4063
	12469	8833	7899	3965	6800	8427	4452	4694	6712	8588	9323
	10290	5825	5863	12663	12881	5346	6125	6242	6654	7129	9084
	4877	10921	11655	9973	4297	1871	9639	5578	7392	6482	4349
	9622	8618	7143	13152	6132	3979	10263	4966	2446	3684	4904
	8649	10090	9193	10362	5108	6856	4896	7960	3217	4641	4816
	10951	11284	8828	8627	7357	4167	5917	7637	9739	7013	5479
	14184	9050	5052	6707	8427	6419	8010	11348	8687	6502	8505
	8350	9756	13189	5695	12657	4775	5541	5203	4176	5961	9198
	11813	8107	4813	9395	7274	5011	5961	5419	5192	5752	8987
	10614	5776	10380	16735	7217	8525	6450	9042	5545	5499	5932
	10891	10870	7578	11265	11447	4580	10787	5052	4897	5717	5816
	11933	9882	5800	7417	11222	9553	8301	5101	5584	5744	3967
	11541	10443	5279	15214	15049	10585	7913	3614	5635	9512	7595
	9006	9479	6506	10893	4571	11487	9048	5469	6239	4266	10994
	5626	10008	6387	11845	5798	10617	3610	6022	5293	5203	3794
	8546	8611	11356	15351	4008	4379	7790	3404	7310	4712	4180
	9512	10849	9683	3773	4904	7937	6357	10674	10456	6053	3955
	4807	7162	12254	13362	8201	3732	4664	5290	5330	5265	9200
	13590	10615	10294	5830	5696	4449	6780	8646	4584	8140	9348
	12164	8564	11782	2741	8398	5010	3539	6588	7536	10182	3830
	11341	10374	9529	8466	11048	9402	6258	2905	9231	4887	1660
	12453	10246	5579	5313	5275	3564	9119	3956	6881	5028	9738
	11898	9466	4391	8786	11222	4813	4209	7207	4410	2457	4764
	4249	6839	13741	9908	6594	3793	3763	5613	2852	4196	7593
	14072	5384	8148	4311	7112	9220	11130	6343	7411	3206	6642
	13072	7094	10360	9573	10090	4390	3114	6531	4016	4636	6406
	4246	10097	10548	4284	4649	7573	6620	6802	7942	10011	3742
	12515	8808	10590	9991	5683	6700	3784	6286	10278	4413	4580
	6692	6905	5706	10442	4421	8108	9322	4788	6421	6948	5026
	5711	12022	14934	5584	7674	6058	10250	4407	6599	3944	3258
	9292	9311	6613	5639	5664	6941	2999	6020	3450	4055	4416
	10561	11534	9382	7736	4285	8790	3668	7000	5686	7785	4556
	12314	7179	13501	7821	10136	8223	7058	8703	11808	5210	4328
	4770	10897	2424	12050	2116	3473	6172	6857	5242	5066	7586
	5200	9550	6894	11475	8200	7538	6158	5045	4081	10805	2696
	10938	5336	11993	8227	4210	6302	4598	4483	4000	8641	4985
	4300	4862	6390	11200	6336	5309	7096	9969	4422	10168	3750
	12507	12784	4915	6587	10051	11196	9835	6432	6344	3201	4918
	13101	5699	6552	4621	9859	7636	4689	6869	7561	10936	4626
	12467	9921	3791	7933	10324	6293	1634	5438	3371	4709	10859
	10448	12353	6220	9796	4190	12005	4871	4144	10094	8153	4783
	7885	7442	4579	7487	5469	5288	6029	4118	5061	2868	4282
	11021	14797	8604	10174	7506	4509	8426	7975	4478	4901	8141
	9118	14205	9072	6028	4934	7364	5457	7981	3481	8030	7154
	6534	12225	12081	8060	4717	6486	5457	3823	7435	7188	5995
	9493	9901	3712	6453	6473	3723	10634	7660	5723	10626	7121
	13310	11677	7579	11943	3737	7323	4816	8741	6983	8890	7769
	8965	10423	9666	4159	8277	7029	4902	5483	6493	2228	6581
	14649	11111	6156	5303	6410	6487	6654	5989	3015	5210	4233
	9853	11348	12792	14371	3359	5869	6386	3148	8553	3650	5202
	11690	6295	9021	9496	9026	5276	9581	4266	4738	5725	4627
	9294	8869	8192	6334	5291	11051	7675	9430	5495	4659	8748
	11905	15480	10668	9463	8407	5970	4104	4210	5761	11989	5303
	11552	15820	3934	4100	8952	2080	8800	5067	4126	3066	7332
	9563	13752	11053	7213	7636	9662	5320	4160	5685	5165	6380
	13928	11383	8126	4335	4980	4532	9729	4771	4468	5685	3243
	12704	12944	4798	9157	7025	8453	4558	11701	2624	6317	3421
	8323	17051	9022	4263	6751	2755	8503	6491	8146	4643	5291
	9422	15789	11635	8440	9775	4556	4495	4446	6426	9258	11281
	6892	14014	7328	4790	4596	4540	10546	6026	5360	3191	6297
	11149	7523	9022	8619	9453	7344	7311	2052	4928	5328	3555
	7442	11997	7943	10503	9265	5949	5510	3225	5650	3263	5214
	7100	5565	13411	7455	7157	8322	5148	14444	7002	2246	6833
	10773	14360	6759	8678	6309	4258	5624	4263	4552	2354	5102
	6134	5726	15356	7625	7439	8567	6667	5298	4146	4030	7450
	8385	4027	13517	8227	5920	10408	4900	4054	4486	4308	4486
	11997	14278	8914	7529	4941	6268	10654	5732	10794	5414	10071
	8590	11429	8012	4002	8109	5416	4695	6259	8240	6367	5551
	10825	11932	8181	8954	6761	9462	3516	5046	9949	5854	3299
	11070	4113	7715	7336	5859	7551	6880	7029	6624	5273	8876
	12989	11207	6159	6913	5513	4908	5859	6748	9757	7423	11069
	11931	14833	8035	7594	8774	4404	8296	3638	5075	5650	6361
	6335	13953	4877	6885	6547	3477	5839	8933	9659	5424	6671
	11355	12594	8512	6588	4830	3108	10769	7813	3261	8844	4077
	11424	13878	6281	3995	4063	9795	5314	4036	6740	5259	4392
	12750	14544	7662	9930	7947	2942	5413	5738	5483	6505	4933
	11138	10683	5866	12443	5304	3557	3356	4688	4176	5243	4437
	4985	12171	6834	6893	9586	5085	3923	2710	6116	6016	6906
	13425	12583	9637	13717	6460	6156	9578	10519	14256	7443	4627
	11459	7455	9247	11639	4301	10801	3140	5065	5429	6003	8331
	12587	13457	7192	10539	7453	11267	4812	5557	4540	9693	5542
	3512	15466	11578	4626	8876	11035	3066	3737	3541	13732	6306
	10938	8973	12089	6223	14120	5062	4387	9557	3699	4170	4474
	5532	10450	8090	9509	2143	5444	5693	7853	5518	4052	5378
	12857	11975	6154	6117	7718	4650	8698	5746	6808	5482	6133
	10794	13339	10969	8540	8019	3915	6312	3477	3681	9544	5324
	13679	7648	10678	5568	7234	9207	8613	6636	5731	6064	10406
	9755	10410	2265	4978	8735	7634	3418	12237	4605	6810	4812
	9459	5715	4928	5548	9207	8560	11307	6477	3917	6312	6505
	15381	12919	7704	9580	7134	3090	6489	6543	2567	3308	4923
	9383	11994	4830	9312	8506	5392	4578	2409	4016	1653	4813
	10616	11582	7563	5743	5330	2975	5763	11487	10097	4630	5436
	20205	9832	16004	6989	2438	6492	6816	10040	5534	5356	3423
	12974	9649	11017	7286	11843	3989	3078	9343	5141	8162	4091
	18410	4944	7038	1798	3590	13402	3073	6095	6232	5226	8036
	12917	12806	10981	2928	8080	5616	7067	9400	4709	3598	4530
	13571	5725	10679	7256	6105	8457	9132	5711	8712	4885	3790
	9909	10274	8574	7465	4846	10400	6393	8674	3717	6390	8622
	14537	9358	10152	7836	2219	4861	5647	3826	11063	8441	8237
	11251	11561	11629	8395	8501	7255	5220	6001	3675	6890	6033
	11369	5100	10879	5213	7846	4231	8301	4839	4587	3999	5783
	12041	5869	12524	6190	6693	4646	5133	9024	9920	3678	9249
	11990	11612	7273	4351	6973	10076	4997	3673	6322	5626	5651
	11444	10025	10057	6560	7581	8220	3821	5824	8137	4222	5506
	9713	4624	10297	13576	5685	3267	8239	7610	6081	2391	3649
	12026	10657	4336	6580	5090	8513	10202	1722	5562	4262	6200
	8656	12365	10805	8973	2400	8942	5481	9435	7618	3966	5001
	13184	9440	5594	8151	3049	4156	5048	5248	6899	10600	3805
	10119	8372	5741	11522	4928	4766	4348	4367	13770	6147	6171
	3473	7633	11898	4821	10329	12649	10962	4854	10353	8906	3518
	10613	9495	12943	11371	9688	4649	5245	4773	13111	4825	7671
	6284	10916	11605	17489	6225	5171	4033	8953	4703	1339	4728
	6188	9054	8828	5694	10854	6895	9092	4001	5965	3162	7654
	9053	10860	9833	6592	12117	5855	5718	5960	3313	4635	4347
	8673	9494	3738	5241	4934	7995	5205	2124	3929	5017	6579
	9306	10309	14011	5720	6219	9872	11073	5584	5871	5455	6923
	13788	6707	6051	12591	5007	7054	5780	13635	5304	5502	5573
	6012	9867	6403	11470	6137	9289	6455	3948	6540	5665	7304
	10832	7943	7786	4373	11122	5336	7730	7068	5090	5441	8569
	12671	11629	13521	5700	8288	8534	5261	5918	4618	4846	10052
	9653	8686	10342	10749	6126	15139	6933	8269	3913	4097	7737
	11185	11386	3975	7145	11926	5547	14019	6403	5480	4287	6761
	4980	13309	10885	9838	5463	3807	7529	7780	3167	5970	5392
	7972	15129	12344	5386	8860	7833	8506	10100	6102	2513	9601
	8904	8060	12564	11899	8090	3927	6429	10140	13762	6098	2849
	11246	6183	12773	5097	11720	5573	10851	11620	5764	8000	6067
	11077	8431	4604	6793	3955	9836	13694	4494	4152	8975	2759
	10224	12339	8284	7976	7018	9167	4417	5497	6557	6800	6609
	10534	7232	9884	10162	9866	6599	5866	5148	8258	4575	12300
	12848	12181	12043	5198	6393	10925	5542	5914	5272	4422	7435
	11286	10237	13574	4971	4527	11916	6110	9573	9159	5003	3038
	10238	10036	14912	7713	7960	12998	11690	6513	7079	4210	4152
	9529	14097	14504	6962	5568	9708	8068	4492	5226	8744	7943
	11221	8595	14964	11773	4675	4472	7227	11972	5202	9014	7595
	9275	10687	13848	12644	13338	5108	11284	5586	5936	5611	9833
	10584	10630	11483	10244	6507	4092	14471	4410	3804	4689	6865
	9247	9280	6299	11192	9516	5417	7091	4454	6213	2165	7296
	7384	9192	13269	6183	3993	3321	4582	4017	4496	11433	12380
	7465	8831	8700	8459	7939	5566	5426	7345	3445	3777	7160
	10269	9972	8943	5745	9688	9303	7292	6100	5033	3881	2786
	10021	10676	5603	7862	7767	9691	5879	4126	6956	5518	8443
	10226	10324	5657	6400	4803	5834	3265	9890	13516	6818	9435
	7145	9999	11224	8614	5205	4596	4331	5582	6817	5944	2606
	8668	10160	4166	5066	4261	7006	11395	4745	7457	3516	5492
	12727	7661	10743	5029	12279	2332	10244	3704	4868	6733	5236
	6380	11391	10066	11857	4308	5632	5775	4734	2795	2362	13012
	12400	6148	5661	12860	9555	5223	5563	5443	3113	5496	9300
	9713	12235	10419	11015	5597	3666	9244	6308	2796	5036	4778
	11937	10232	3630	6138	9491	8931	6343	7781	5411	6027	2411
	16631	8749	10643	6016	6785	1261	6089	6341	5505	6834	8888
	13451	9476	6915	5734	11202	8404	4981	8903	5717	9937	5303
	13802	7186	7625	10987	7753	7040	9466	4439	6844	8365	9975
	10630	6550	4754	13221	9544	11399	6627	8849	5661	4977	8469
	7558	9483	5526	7956	9064	10668	10846	8935	6808	4134	4333
	10910	10527	6065	11284	7040	3434	6237	5813	5546	3239	3562
	12503	8988	7450	12975	10635	6950	3697	4769	6343	4012	5370
	4211	6069	8701	14798	3949	4860	6322	3880	6373	4192	3654
	8852	11745	10823	13644	9179	4606	6029	4042	9731	12471	2456
	11198	7629	11133	13656	4336	4768	6143	8578	7730	6188	2599
	11537	8088	11567	4565	5507	9769	8100	2349	7018	6355	2134
	9592	4506	11779	11431	8240	2353	4482	11166	5168	3052	4682
	9438	7497	8759	6107	4427	6378	3959	5347	8440	4566	4912
	13422	9253	4994	5877	9811	3916	9467	9522	9279	7154	3839
	12162	5348	11738	7754	9683	8436	3454	10214	6044	5653	6371
	11417	4011	10067	3590	4907	2517	8082	3441	5506	6186	2054
	4495	9970	10182	7737	8250	5235	4880	4479	3798	9413	5367
	9054	4701	12069	13780	2194	9524	8566	8555	8747	9506	7033
	12937	12079	8299	5264	6142	7015	2362	6058	4114	11281	4503
	9851	12659	4489	9323	8194	5242	8744	4922	8281	4712	4340
	11841	11217	13801	6158	4193	7902	9524	6409	8768	9755	6882
	11973	11905	8043	12581	6592	5912	3203	6915	6699	4176	4840
	5736	10145	7816	9067	5824	5723	5188	5812	3454	8951	9188
	12994	11307	9641	3893	8581	3236	8500	4119	5255	2318	6681
	12647	7506	8083	4211	4829	6391	7826	4461	10747	5075	5351
	9537	10767	17735	6669	7635	7186	5032	4350	3765	5413	5899
	11127	11181	7155	6330	9178	5590	4968	6182	4301	8128	7672
	8983	12713	6068	9440	5944	7826	4799	8328	6948	9526	8236
	3765	8077	3886	12883	5131	6479	10547	7540	5904	6761	5665
	12906	5597	7434	10227	7777	5141	6430	3797	6999	2983	4419
	12053	7268	4635	14198	8339	8109	5256	5333	2506	2727	5997
	13004	13079	8915	8339	11047	6092	2680	7690	8150	4203	6175
	4612	12098	9420	4517	3488	5465	5982	8775	5471	5275	5371
	9650	10330	10627	8362	7082	6640	8798	5016	5030	4598	7045
	8595	14142	4345	8181	5486	5760	5526	4694	3204	12825	4353
	3693	14583	9558	10100	6448	8189	9524	5436	5348	5086	3771
	9185	12589	8176	7979	4587	6208	5595	7304	4768	3709	4301
	11304	17883	9021	4462	11436	4931	4618	7913	8658	5465	6903
	9976	14326	8690	10565	2738	4047	3795	4686	4905	5576	6567
	10284	8704	7755	6849	7203	5871	6680	9659	2700	7230	4970
	4998	10560	9914	10024	5714	4485	7656	9848	8833	9633	5169
	27849	7577	6703	4481	3503	11096	7411	5604	4750	2428	8929
	8295	11003	3355	5777	8458	5815	3856	5444	6121	9433	5946
	11182	6216	9042	13803	5110	1843	6361	4908	5688	9209	5456
	10015	4878	8674	8683	9218	8110	6563	5179	3559	4212	4578
	11341	7264	7200	3864	10724	7210	4370	8720	4475	2248	4763
	10659	12861	9389	7572	8214	6809	10207	3731	3481	4405	4497
	3913	14928	13240	6571	7368	2280	7060	4909	2940	1790	3845
	11267	5502	6113	5493	8873	4172	6668	3825	10297	6179	7893
	7694	13354	9015	4417	8612	5119	4936	5986	5805	6644	7547
	11173	14875	11853	8333	9578	5951	11714	13935	5622	5748	7010
	10642	11601	11741	4460	2552	7343	8452	8212	5566	7831	5601
	4790	15000	4619	10241	7347	4098	7971	5281	6610	7476	5327
	9562	11376	13043	2822	6400	7151	5878	5726	9033	5256	3142
	6167	15184	12168	9962	7604	2987	6176	3827	6961	6836	7768
	8858	11297	8097	6534	7640	5877	8505	3652	6181	5288	3655
	6687	10174	5230	8640	9832	7153	4486	10483	4539	12023	6490
	3737	16763	6258	7990	7070	4237	8953	3131	12517	6490	5994
	8491	12627	6855	9446	6277	7310	3018	5462	10504	6527	6863
	6482	11333	3755	8190	8617	8127	6556	4048	10290	6578	5419
	9224	17162	2103	7346	9347	6968	4438	5326	7593	5488	4573
	9035	13499	6295	2753	5645	7212	6097	4991	7574	7678	4225
	7222	13976	3057	7582	3940	6501	14090	9661	5550	5817	4349
	11994	13380	5445	6451	6670	11839	6056	4928	10251	8847	5988
	12810	16545	7775	8131	7959	4199	6691	3123	3216	7625	4106
	13435	9726	5562	9165	4351	4140	4798	2252	5707	5274	10420
	10243	12150	6863	4268	2196	5014	5503	6499	4673	3819	5610
	9142	5289	6083	7870	5586	8318	4502	10034	3205	6299	6060
	9653	13396	5065	8071	4266	9183	3729	4248	5877	8378	4096
	11052	9592	5391	7888	5270	11889	10437	4275	13907	5514	7146
	6792	11741	8884	10327	5161	6551	2806	4320	6700	8028	7191
	7067	10046	9783	7293	3979	4649	5423	4252	3203	4523	4484
	5394	8504	11489	11936	5509	6399	3996	10436	5243	3777	5496
	5748	7048	6893	10599	9539	4378	6341	8785	4350	2960	5700
	10008	15382	8845	14796	8846	5018	4916	6311	4951	5158	4897
	13564	4238	10529	5268	3242	8904	7178	3836	5065	10692	6633
	5355	8489	9978	7847	8106	7369	7537	8165	4226	6741	6935
	10852	9184	6297	7966	8511	8347	9890	4502	3586	3343	7709
	12287	16356	13259	4425	7068	5199	3062	6501	6792	8942	6152
	12795	6116	10894	11266	8464	8619	9083	4310	6042	11464	4624
	12641	5245	1970	6345	8294	5531	8090	8773	2899	7387	8789
	12547	14180	4043	5720	5941	6579	4208	8814	4852	5042	6756
	8526	7818	5169	4984	5799	4578	4802	4544	9139	4227	5424
	8646	4131	5315	10060	5581	11770	3848	6403	5036	3872	4106
	22464	9510	7155	10657	2062	3985	4180	4773	4786	5039	6944
	13026	9397	11313	4943	13594	8303	11598	12725	6174	3667	6398
	12309	9730	10248	9444	4759	10112	4665	9844	3904	2703	4587
	12028	8730	4939	6609	8918	5010	4913	9495	4381	5421	6673
	11832	8494	9177	2937	5674	6791	3420	5283	4683	4079	3783
	12392	7666	11063	4624	3683	4219	8132	12345	9556	9178	6589
	13193	6123	6626	12087	2879	7344	6174	5024	5188	5515	4807
	5102	10661	10365	8868	9794	9565	4329	11649	3782	9290	10724
	5158	10632	12293	6889	6261	4211	5314	3524	8986	4130	5737
	12335	10391	12126	7866	6200	4274	4694	3446	4437	3562	8980
	10749	9040	9189	8845	3411	8433	6638	2438	5018	2910	7256
	9677	6163	7352	4921	6466	12499	5216	9954	7619	4619	6126
	8090	10715	9800	5531	5323	4525	7813	2612	5653	7156	4918
	11753	8109	13010	5530	12868	3601	5784	7062	7295	4076	12236
	12791	11396	8164	6814	7103	8408	9865	5999	6192	5577	8715
	9868	9740	12306	9028	6788	5803	9428	2195	9019	5583	8056
	14518	11305	8500	4007	5190	5817	3726	4504	8363	7379	5282
	11138	10255	6897	10786	6606	4796	5430	8707	18089	4810	4842
	11671	18457	10920	7598	6024	4989	3315	5237	5960	4474	12804
	12135	5570	17039	10649	3642	5073	9841	5141	4997	5467	5197
	10547	2332	17105	6702	6136	12038	8534	4801	4050	4645	6106
	12333	8601	5691	9973	13914	6223	4764	6065	6253	6423	10866
	14179	7520	12630	22765	10529	11682	13721	7444	7433	6471	8213
	11881	7122	7321	5333	5853	5133	5799	6018	5867	6974	3505
	9133	7959	11422	7628	9619	7817	9301	8591	7928	9353	1996
	11492	8401	7278	4630	10229	10969	5799	4761	4720	6976	8389
	11164	11101	5332	8317	5673	4257	4856	6323	6843	4350	3064
	11745	12146	6040	16370	6964	4014	6766	13291	5635	11527	9257
	9772	9614	14891	9299	4455	5838	5287	4699	4232	5632	4983
	8512	9042	9761	4899	5555	5037	5232	4768	4991	8397	9778
	10176	7128	5944	4801	13527	5608	12200	6872	5602	8821	8996
	14985	5299	9909	12716	10110	10216	6041	5920	11541	4699	5507
	11358	10627	9714	6764	4948	8893	7567	8016	4854	5067	1850
	13823	9128	10984	13688	11364	5793	6016	6544	2769	5330	7438
	12990	9577	8994	5553	6889	10627	8383	9006	5579	10384	9764
	8523	10301	5146	11143	13051	11307	15320	8537	7472	3620	4518
	10807	6268	14955	5324	7150	11112	4320	12115	3776	2775	5636
	9143	6788	9832	7754	12653	9524	7961	4205	7792	4917	4897
	11175	7804	12041	9130	4406	3808	4649	6085	6971	6161	9436
	12421	7409	10510	9499	9949	5339	6029	4490	6287	4113	13161
	8679	5724	11641	4945	10104	5215	8432	5352	4259	4236	4371
	10939	9253	10789	5027	5636	4669	7799	8464	4652	8697	3481
	10742	2372	11445	9087	5351	3470	6347	5115	4653	5542	8178
	9111	11616	9797	4269	8293	3634	13330	6324	5825	5755	4324
	9906	7883	12196	14890	5778	12183	9156	13367	4066	2904	11200
	12183	10804	5057	14815	5542	11735	7791	3932	5098	7157	5498
	14045	9438	11948	13023	14643	4818	4931	3842	2564	4368	4709
	10519	9969	7674	11759	7470	5320	4050	4091	4479	8496	2889
	9198	11742	9681	4339	7691	7613	5696	5236	11305	9605	6925
	11928	6518	8360	10253	6316	8105	4402	5507	7300	3671	3627
	13064	4420	5911	4738	9500	7074	5952	4563	8837	5143	8236
	14924	8810	7266	7699	11045	4829	4922	5238	4659	2598	3121
	5113	8491	3985	5043	11657	6802	5132	8839	2771	4333	6556
	15211	10605	9293	8395	4711	7778	10219	5721	2582	2998	4495
	12009	6895	8641	4302	2465	9252	9085	6524	3877	10362	5324
	5783	12268	5234	5065	5541	9454	4493	3762	6057	2730	3633
	9435	9171	9012	9140	11570	10708	7351	6309	5527	5612	7597
	12062	12629	3362	11366	5567	4508	9545	6472	3938	5838	2066
	9526	7903	10593	14127	6416	7472	5572	3653	6575	10059	4247
	10389	11848	8874	5708	6764	5081	6112	6629	6664	5329	4054
	10194	9281	5255	5720	12297	6448	4427	5825	4365	6518	5604
	11299	9350	4231	4550	11161	4038	12563	9068	4926	5359	5361
	5652	5365	5555	12217	9208	9418	8172	4872	4840	8518	5953
	11903	8374	6695	13365	7305	3356	6559	7582	5045	9400	6834
	11492	3922	8417	6750	11711	2250	3599	7205	6453	3470	6070
	12947	12167	7208	13928	11104	5036	4834	5981	6770	12163	7746
	5853	15805	10050	11996	11262	8523	8454	3996	6139	5230	6853
	10690	11242	8973	12496	8649	3505	5059	3212	3318	9002	6608
	13300	13081	10266	15124	2375	8601	6721	4317	7777	3084	6553
	9944	12041	8526	9874	7943	13147	5992	7797	7977	5560	10250
	13240	12065	5235	4599	5231	6951	3675	2250	4524	4647	7097
	5711	6597	10847	9667	6854	6740	3967	9961	3865	6377	3696
	5676	12014	7544	6277	11124	5751	7364	3987	3717	12044	5393
	12273	12087	10547	6185	4903	7470	4151	8357	8615	7147	5324
	4707	11097	8425	9405	7443	9595	9815	9659	6645	4788	9887
	11611	11876	10642	4975	9938	2714	3161	4776	9450	3189	5472
	11629	7027	5905	9019	5752	3296	5814	2469	5049	4320	5650
	11190	10631	18329	7686	5727	7426	4493	6554	6296	6171	4534
	12120	12840	6517	4189	4561	7281	9381	5636	3703	5872	1747
	10678	10632	7715	13312	5586	7248	7927	3717	5066	13358	5173
	11107	11538	9089	4349	7987	4704	2180	6996	10956	5508	6380
	4225	9402	1887	12789	5995	8358	3087	6608	4409	5715	11324
	5767	13542	9408	9612	5817	10921	7578	6070	4680	6347	7189
	4579	4996	11110	5408	6416	5085	7569	5436	8060	6878	4815
	10662	16009	12400	5803	7515	4532	4936	4706	7601	5804	6376
	10530	9840	4260	8265	7043	5635	4260	5253	5940	6326	7260
	6161	8311	8223	9853	8888	5851	6726	5425	8184	12550	8551
	15962	9995	4973	9823	6409	6065	3041	6384	3253	4487	5633
	13151	5917	6816	12755	4976	5711	5170	7471	11763	5089	4100
	9583	13622	3606	9237	3181	4253	4185	3819	4471	2260	8150
	11449	6674	7130	9716	10630	4551	5187	3875	5955	7921	3859
	6468	4570	11818	6751	10239	7323	5946	9417	5006	13175	7030
	8124	8792	10606	6155	13696	6501	5233	8833	5671	5172	12760
	11820	9977	4293	6030	4067	8374	7236	6217	5085	2473	6131
	14516	12802	11272	10901	5792	5054	8541	4575	11528	6837	4841
	12218	7081	7455	9365	6761	2412	6276	4032	2739	4161	7068
	5156	14050	6517	11626	5615	7384	4069	8364	7480	5370	2611
	9343	10028	8502	5587	5121	11881	6325	5774	3402	5486	5696
	4479	14708	9637	5720	8927	8128	3938	4645	3771	5652	4791
	14006	12312	9845	6812	5647	3888	10418	4445	4212	6165	6167
	13819	8674	9696	10723	6340	8241	2451	8522	3368	6703	4457
	5203	14144	4136	6249	5415	7345	7884	7018	6182	4579	5941
	7689	10727	11123	3366	3659	4555	5908	3802	4317	4763	5141
	7160	14242	6465	10938	6804	6651	5040	3942	5062	2008	6544
	9113	16427	6383	8190	6669	8815	9102	5281	9717	13033	4815
	9031	11982	8968	3735	4177	4311	8497	9426	5889	4015	6942
	3388	9797	10324	8602	13440	7472	7251	4873	4395	5987	4950
	7633	13593	6376	4634	7655	5610	4336	4709	5784	6057	6939
	10526	12187	10659	5024	6487	5423	6620	6350	4638	7450	5483
	14577	10264	12266	5353	10224	4128	8879	7740	10102	7619	6452
	10550	9483	6566	6559	6500	7836	7144	5370	8036	5527	6861
	11733	12947	10389	6835	7434	6153	7749	5742	5876	7414	5050
	9041	9248	12685	10062	2612	5231	4110	4157	6038	4966	6620
	8154	9690	10573	11406	8224	3932	5443	5363	11729	4335	6704
	12646	6432	5583	7330	8977	5346	6110	2355	9344	5957	4140
	8617	11363	6938	5358	7231	4492	6507	10968	10847	8327	3676
	10690	11284	8488	8245	7830	9727	3309	4804	7505	6362	6674
	12407	9933	4827	7229	10710	3980	5612	3886	10472	6580	4905
	12712	9695	8040	8376	4826	3424	5432	3641	5839	6146	4958
	5359	9289	6832	8018	7528	6106	7857	3343	7261	3515	7471
	14231	11716	2830	2978	11736	4378	4790	6470	3357	2456	3927
	10871	17153	7284	7933	7642	10156	7081	5983	5111	5025	6986
	10171	5303	10314	6078	5345	10571	6747	5060	3886	4207	5754
	10290	6249	10460	7293	5289	11221	3664	6619	3812	10060	10129
	9726	12019	7462	10285	8749	6108	4561	2514	9332	5638	1880
	5047	11416	4868	3834	6657	6612	3509	4914	11146	5878	6040
	10424	4980	7596	7627	4359	4491	4877	10839	10300	3664	2714
	9866	4350	5774	6305	4120	4949	9363	3159	3932	8066	6996
	8503	12981	6716	10119	8246	10121	4840	4935	1821	6896	9269
	5290	9567	5014	9850	3586	4053	4933	5549	2328	5746	5652
	10756	3458	9462	6759	5189	4666	4057	2440	5124	3950	5742
	9442	9241	7775	8141	8131	5738	5165	10331	4801	4782	3810
	11986	12176	11199	13811	5925	6158	5530	6632	3923	5590	6219
	13043	10521	6888	11047	7290	5073	9141	8201	3479	6311	4806
	6069	8273	10746	5533	11801	9772	8920	3008	2730	3966	9786
	13896	8176	8823	7709	5560	8012	7636	11786	5002	5054	8127
	11207	4998	7949	5276	3057	3067	2572	6323	2444	4065	6116
	6303	7631	5421	5353	8708	5897	9842	4572	5600	9377	6669
	11916	8802	10745	11019	8008	3844	4958	5509	9858	6261	4370
	5746	12298	10979	4895	8464	6793	5182	5627	4800	10469	6008
	10805	10950	6580	3814	4282	4486	4381	9900	4896	4685	11447
	9923	9410	4804	6002	8912	9964	5705	4873	6571	4223	9918
	10859	6862	5245	8201	5482	4849	4034	5259	5981	3297	7382
	6402	10225	4877	9532	6205	8302	10227	7877	9198	5148	2427
	14301	6024	4661	6462	5049	9949	5488	8947	5583	7084	9901
	11220	10666	12025	7712	4958	4188	7360	9619	9774	4694	4793
	12920	9538	8294	5036	10567	6670	3885	6038	4936	4366	7275
	11791	10252	6339	2260	4033	4807	5393	9221	5758	6104	11518
	10896	10928	11199	7668	8252	6246	8091	7606	11834	4564	4980
	24617	20642	11332	10361	6894	11423	8077	4772	5331	3223	5986
	9660	7542	8379	7338	5945	5113	7102	11107	4858	4286	3262
	12964	5101	7962	7542	4026	3120	5052	2422	7837	5296	4230
	12341	5879	10610	8702	8592	6809	3728	6112	5245	4299	7404
	11889	7453	11010	1918	4659	11623	6678	1649	7072	6745	10498
	9211	6598	9666	7953	5825	3646	2603	3525	5676	5358	5575
	12438	8536	9578	6971	3328	5044	6558	7290	10349	8330	7504
	5634	9147	9619	3897	3291	12134	9722	3030	10279	9495	11020
	15033	10014	10915	8593	4531	5857	8397	5459	13509	5790	6546
	9315	10326	5339	6504	14236	5836	2874	8475	4221	4434	4154
	10812	4313	12592	5434	4182	7098	6314	3933	6282	6905	8408
	11696	12028	8663	4649	4445	6368	4195	5706	3472	5013	6800
	5660	6077	6383	5954	4450	5856	8307	8573	5133	6471	3052
	11037	6485	11848	2873	3883	11282	5380	5677	8203	7286	5234
	9521	9552	15322	9125	6948	6498	3395	3302	6869	5782	4125
	11726	9114	20126	4532	8496	9217	9165	7456	5206	3990	8016
	5724	9133	6856	8527	6439	5518	3214	4509	4169	6236	12978
	10932	8270	9953	8409	5817	8670	6995	9249	6504	10447	4368
	13219	2998	4180	9153	5771	12747	11721	5728	5181	4225	3298
	6666	8231	8514	7875	2549	5918	5487	13485	3219	5622	5612
	11181	9378	7551	10157	3227	3652	4989	4371	2430	6484	3750
	4622	7132	4361	12174	8575	4416	7104	5313	5532	5283	8334
	9985	9864	7205	4520	6086	3696	6854	10668	10313	6652	7910
	9006	10347	13297	6643	7253	4986	5944	5284	5074	3670	6761
	12855	1990	11600	3906	9756	7392	11691	5375	4768	11689	3416
	16319	8836	3963	7224	9738	8346	7276	7415	7715	8976	4454
	12885	10771	11819	11835	4727	5787	9066	8439	5472	4874	3790
	13866	13317	10032	10621	6131	11126	6047	5909	4048	4206	2157
	10778	4898	16299	6424	6502	10493	6828	7426	9547	4418	10136
	10611	9174	11647	5529	5107	11614	11581	9419	6872	5525	6670
	17210	11534	5229	10428	8399	7909	5100	6678	5088	7814	3419
	6284	8468	10637	5862	7591	5714	5076	14828	5215	3448	4579
	10919	9586	11135	9808	5411	6557	4436	4207	5197	4189	4778
	10881	6887	12919	6043	11690	5841	4953	6121	4179	4537	2086
	16993	4414	14491	11467	4748	5043	10659	4530	5464	3293	3675
	11528	6544	9922	6694	10324	3656	7374	6286	3079	3177	3431
	8308	6670	13589	7804	8955	4156	5916	7628	2890	2885	6801
	7852	12489	14695	10496	2118	8735	9704	7472	5022	9434	3312
	10653	6555	12695	6380	4990	12498	9178	7684	4580	2028	4330
	12061	10487	9870	4998	7797	5070	4595	8772	10802	5545	5049
	6312	11021	6036	4241	8197	4831	5165	5539	6185	6377	5543
	10041	13532	12436	7997	6008	6034	5183	5366	8180	8201	4399
	8150	3593	10741	6007	6089	4343	4636	1751	6113	3407	12133
	8698	11312	12065	8044	8781	7136	5558	4621	2953	6240	5464
	6818	10154	5909	11761	5582	4304	4775	5591	2863	6955	6548
	9880	4882	6066	12963	7366	12294	3557	4829	2277	7995	7787
	8551	6147	6396	12095	12241	5623	4112	4538	5200	10423	5855
	11552	7346	10515	4975	6382	8040	7526	10727	5543	8922	5840
	4850	6416	12009	10474	12683	9791	7659	4863	5304	5519	5719
	10497	14010	10017	6168	5662	9817	7063	6367	6546	11803	8324
	11624	10903	6073	9131	6006	3695	4924	4845	6725	2359	5514
	10211	11399	9370	4326	11113	8333	8550	4054	4130	6867	4609
	12565	13165	4877	11900	9137	3642	7349	4194	3415	5034	4964
	9294	11120	10809	5026	3752	4292	5671	4865	5401	6141	5054
	9985	10741	9074	4664	1572	4895	3991	9584	7135	10837	8657
	7381	6100	5030	9737	8131	12403	10819	6623	8623	8611	5629
	11308	11968	5479	9723	15359	2552	9110	9519	9358	4610	4470
	6369	12929	5252	12109	4584	3898	10665	3819	5862	4136	4846
	6558	12396	5602	6431	5030	8032	9918	6702	3031	4299	3656
	10912	10610	4283	6698	6007	3221	3853	7357	6954	6025	3321
	6212	7743	8762	6683	7538	4258	6992	7287	6954	3738	5694
	11652	10511	10353	12740	13982	8491	4567	2853	6972	14263	9429
	9371	12308	8203	14830	8227	6154	4483	4864	5287	5478	5881
	12255	7052	9746	11374	5450	7567	4408	3609	4751	8987	4401
	14452	11345	9157	11658	13736	8304	3345	8671	8792	4922	4538
	9323	7068	8221	11214	9111	9947	4182	3518	8254	6397	7829
	9902	13542	4279	11832	12603	3994	9047	7122	8722	4994	8300
	12215	13255	15367	15060	12698	2654	2604	5147	8942	9042	5208
	4000	14724	10558	14095	2640	2961	10323	8040	6433	10180	4626
	12047	11442	8263	3821	4508	7329	4672	9230	4525	4167	6264
	11558	8134	10773	10197	3910	5892	6783	3671	5442	4679	3290
	14300	11454	9472	6177	7169	8745	4199	3487	9757	1736	9879
	11611	7023	2463	5453	4204	6107	6826	6869	4351	10492	7061
	9801	7666	14405	11626	9697	7358	9590	7334	3720	12225	4934
	13313	3781	7593	4831	9661	9578	3068	4598	6893	8129	7609
	12648	5303	10338	9758	3924	5877	2791	4503	5703	2219	4650
	12290	7199	9574	5390	6593	3459	8645	5999	7250	3331	3065
	14102	10537	4352	4767	5990	7017	8475	5972	6050	4645	6033
	6503	10808	11246	11969	5151	5883	3644	2830	3172	3322	5002
	12988	4653	15892	4366	8072	4109	4694	5153	11603	3806	9102
	11662	13199	8757	12187	3895	5398	6573	6744	3258	6833	5945
	9120	11962	3272	8378	6461	6532	4256	6820	4792	3427	7758
	13337	14689	6563	5250	5849	5886	5838	6687	3545	5419	4497
	14532	9569	6751	5935	9735	5377	3041	5749	4721	3178	6124
	10367	5518	6162	6343	5051	6093	4528	3034	4923	4261	4446
	11709	16853	4894	7385	9162	11406	2783	4072	7265	4469	5100
	12749	10022	8633	9035	8624	6873	9378	6825	8422	6079	6281
	9520	15652	9718	7413	3650	3806	11025	3847	4741	5345	8559
	11593	17019	10926	7238	8363	10319	4545	5335	3774	5857	6502
	15541	13938	4685	9860	7379	12491	4298	4448	4403	9206	3866
	12306	7819	9178	8711	6835	7908	7633	4191	3018	8635	5965
	13787	15250	8918	4648	7973	3675	8985	11838	5109	7418	6481
	13728	11998	6604	7743	5701	5753	4437	3843	3995	6361	3405
	8672	15104	10937	6863	8998	6542	6825	7884	3122	7591	7173
	14043	9413	10390	12653	6186	4879	3840	8432	8560	6502	7036
	9157	13561	8677	9608	4378	3493	6182	6824	7468	5356	6429
	9976	8709	7472	7422	5376	8393	7758	6861	3698	3854	5276
	8154	11996	8771	3315	5068	2975	10040	5350	6047	4544	5301
	14533	8183	6471	9816	3237	7459	6540	4149	6505	8407	5278
	11451	9262	9156	9790	4749	9461	4519	11684	9436	6549	4131
	10367	10293	13232	7591	4969	4898	6755	4310	6727	6013	10935
	9523	12911	6782	5281	5588	3432	10007	4685	7012	1579	4595
	12309	11366	7582	8886	6740	9579	6793	4001	2514	5470	3541
	11707	11173	9962	6658	4378	8568	4912	5308	8936	2709	4566
	12275	10594	11198	5432	3986	5191	3174	6543	8725	4973	5530
	9184	13400	7023	6079	10419	4463	3937	6980	9313	4926	9037
	10089	5490	12685	3448	6675	5869	6676	7790	7922	9319	4827
	8428	12151	15398	5734	4627	7636	10104	4947	10067	5416	4033
	11762	11246	9475	4031	8809	8546	3473	2734	4066	2453	3483
	7164	12697	5951	7455	8886	3910	5922	9986	7376	3745	6515
	8318	4531	8942	3993	8573	4203	5380	2809	2864	7326	4076
	7811	5581	7226	10038	2578	7211	6369	3747	4418	7904	10075
	10413	12915	5768	11306	8066	5647	8942	5247	8259	4361	6052
	9059	10763	9049	7271	6792	12997	6770	4669	2878	5471	5964
	9751	8643	5870	6192	6049	6589	5800	5321	4879	3442	7816
	7647	11399	6136	9156	5946	11196	6064	8170	11552	7922	6229
	5913	10655	5998	9678	7908	5267	4092	6631	6964	6747	5181
	10305	9660	7560	7697	5348	5244	2899	8540	4358	3423	11876
	6894	9247	4068	5570	4874	4405	4074	2142	5599	4621	11189
	10005	3107	8319	4042	9885	3487	12736	5771	5256	10241	8306
	13278	6005	10821	7071	5186	9568	4737	10021	5929	6265	6471
	4441	9062	7658	6169	6027	3004	4992	6202	5449	7968	4409
	11569	9695	4415	8375	3710	3246	3426	5140	9890	3869	8388
	10160	9363	8385	7634	9009	6863	4797	3406	3216	4345	5450
	7661	13082	5554	5677	5910	5042	4641	8693	2262	3282	8112
	12423	11335	5832	6122	5032	5129	5876	4382	1435	3199	10313
	12982	5750	5201	7507	2910	7150	5796	5364	4920	6026	8513
	15048	9080	6645	12329	6745	6892	6591	3711	2356	5432	4895
	14092	7463	4276	9456	4915	7383	2761	12351	4445	7475	7546
	9642	9720	10974	7637	5128	4977	12569	6377	8537	4748	5698
	8864	11178	7105	9773	6531	5920	6147	6940	5512	6431	11139
	9468	6581	12091	9478	5652	4849	4142	6473	5282	4746	5109
	9573	10430	9747	4498	5913	6052	5230	5513	6293	4999	8621
	5306	16181	9955	4765	9714	5032	4153	9547	4799	6994	9269
	13301	10106	5559	8045	5582	8774	4116	5564	7731	5499	7509
	4949	4196	8806	10592	4328	4701	9349	4650	4054	5598	4180
	7687	6618	14291	5285	8426	9543	5285	4975	4190	9218	8070
	12045	3552	6589	12070	7990	11660	6238	8706	5836	9691	9906
	10439	6523	3756	6431	8874	5360	5033	7657	12049	6106	3782
	11944	11579	7357	4891	3124	6374	11779	10967	6416	4884	4650
	4284	7221	3598	5255	7453	4689	2642	4270	5381	7397	5248
	10505	10964	6626	9116	4684	6393	4020	9492	4359	4066	8346
	13625	11715	10576	9915	6249	7548	9242	3299	6868	10532	11551
	10849	4941	8027	6556	5447	6261	7451	7841	5471	6328	4070
	14162	12849	3605	10220	6354	5734	5317	2261	6642	6660	2544
	10743	8325	9421	6286	8100	12622	7139	5045	11785	3624	9993
	13115	6834	12870	2398	4684	7741	3835	6659	12740	2345	4162
	4041	10938	6464	7615	9638	4728	7419	10742	5990	7075	9206
	11763	9091	6731	11251	6729	3903	4436	6194	5298	3441	5733
	6503	8748	7626	9631	6773	11484	4601	3143	4435	8260	7920
	4466	8596	11732	8115	6425	5897	10891	5605	5610	4758	3350
	10081	9586	12115	9356	10052	5780	8217	6060	6026	5205	4082
	11545	9037	6579	2460	7509	8123	6270	2396	7372	5184	4068
	10558	7698	9052	4823	7399	5775	6578	4456	5510	4386	4475
	11458	9475	7864	6526	4343	5226	4906	12419	4769	10608	6973
	10378	5087	6050	4550	6546	13952	9577	2483	7304	4581	6309
	9815	9603	13335	9371	4310	5463	5106	3879	4547	4633	8414
	11667	11448	6441	2016	9514	8760	5993	8574	4440	2740	6639
	6336	11259	7274	6346	4257	5301	7656	4570	4191	4729	3498
	9484	5215	9908	8122	4275	7143	5020	9334	5659	5285	5200
	11845	9398	13026	4990	5371	14907	4317	6416	9971	6296	3213
	12905	8817	15716	7333	6268	6281	14310	6571	4826	4361	2452
	8536	9712	6328	5856	3397	4447	6008	5278	2917	5252	7685
	7573	8214	12978	3907	8007	4431	5801	4894	6362	3530	2557
	15540	6968	5594	9146	12538	5077	4986	13496	3693	5176	5485
	9512	6566	9240	11490	5862	6540	5161	5297	4924	3147	5866
	5547	5856	8567	9715	7173	5540	5801	4371	10363	7487	4708
	8129	3012	3757	10138	4611	6869	15155	6514	6264	6400	4523
	15087	7855	8068	7162	4949	4480	5643	6433	4430	6904	10974
	3550	6320	14137	5053	3946	11976	12392	6227	3834	7931	6961
	10177	9893	12104	10734	12673	10953	3337	7628	3603	4262	4825
	10249	13490	5042	12021	8513	4339	9634	7309	6999	4298	4765
	12611	13044	13191	4243	4046	10998	12753	6283	5769	11928	5075
	10603	6246	12809	5365	8195	3141	4180	14413	3381	7037	4754
	10145	10691	14884	4006	9914	5812	4644	4561	4861	10924	5494
	5786	12476	10241	4365	6693	4466	5678	6911	6024	10487	9875
	9527	6102	6750	11134	6759	5045	6529	6899	9742	4175	6086
	11674	6677	12210	9468	5914	4585	8937	5303	6569	10227	4496
	8487	6559	10376	5822	5730	4391	7096	9068	6827	3182	3962
	11503	16102	13335	6342	9348	8437	5655	6943	5187	5543	5410
	13569	12418	16174	12764	4914	9565	12606	5905	2312	7815	6767
	9401	12093	11478	6733	15431	4856	11301	14406	3692	9456	6457
	9281	12423	12243	12610	6278	6039	5642	4171	1834	11372	7262
	7263	9812	12438	6405	6243	8596	6469	4917	4314	7510	8472
	12907	11812	13678	8276	11703	4228	5228	4436	5783	3283	3698
	4462	7425	12959	4445	5775	4344	5733	3331	6329	3202	4338
	8837	10161	5181	6669	4280	4822	6097	6740	6277	4953	5269
	11861	12430	11878	9099	7931	9926	5185	4317	8067	4940	5037
	10816	11197	6859	8489	7490	8036	4577	11234	5150	4970	4571
	10190	11123	10149	6960	6144	5965	7759	4975	3084	6421	3787
	13182	5436	4406	5003	8389	9287	8688	6781	5581	6491	2539
	11218	9530	7506	5720	5101	10269	5110	2899	8421	9913	9777
	10481	10392	6613	7663	4306	3656	5893	6277	9608	5710	8882
	8888	6536	7602	5374	10373	7288	4577	6640	10012	6350	4437
	5139	11457	10256	13312	7169	4564	5456	3177	6641	6327	8006
	10439	7936	12134	12436	9595	2792	5779	9722	6502	8332	4229
	11209	11217	6403	10944	7672	4751	5825	6099	8301	7333	6359
	13531	9450	12505	4962	8279	4820	7757	4189	8333	3760	9199
	4015	14470	4111	10777	14868	2898	9450	5030	4970	5661	5859
	13463	11185	13378	6836	10485	5335	7731	7507	5081	5251	7122
	11140	7820	8601	8588	3457	8053	8066	4562	5620	10100	5826
	10389	7143	7048	5723	2413	2858	4504	6699	9349	10278	2269
	12302	5196	2535	9231	11113	4017	7635	3820	7808	7901	5645
	9545	11438	5945	3691	6045	9988	4368	6330	8897	3711	4029
	11356	8809	6441	5403	5377	4409	5097	7755	7320	3596	5770
	8837	5203	5013	10347	9124	5679	4771	3903	6528	2488	5854
	15131	10355	6664	6816	13188	7024	4287	11277	4001	3504	7663
	12326	11934	8291	8830	5735	7137	4427	6669	4105	6283	5270
	9949	13827	8633	4572	6670	4422	6956	7194	12562	2625	4409
	13946	5151	9383	5451	14556	3101	3418	10807	4046	6375	3392
	12390	14422	10458	6853	11424	3340	13167	3686	2328	4752	4195
	11449	12020	7969	11201	10003	6728	3380	4768	5548	5170	9387
	14100	14280	5158	12891	11839	7798	6266	7244	6217	5453	5435
	11451	16024	7619	11264	4617	5969	5868	6332	4563	4337	7709
	3941	6420	8395	13884	4908	5041	6366	4594	2907	4896	3516
	13245	12781	9423	12289	5272	6531	9592	4688	10479	5931	5287
	11027	11031	9332	10241	5376	7874	2739	5948	3847	12087	4948
	10270	11957	9470	12759	8630	3113	3170	7274	5392	7058	3436
	4450	7970	5843	12130	4701	4660	7882	1964	3998	5313	4695
	12733	13367	16447	3477	10236	4843	6050	4745	6155	8232	8288
	15606	6258	6114	11080	11567	6256	4759	5502	5466	5441	4636
	12561	10553	9604	5527	5980	4718	6091	6004	6609	6946	5715
	4375	11827	9474	6616	6350	6461	5248	7423	10663	5630	4287
	10080	10833	4301	13265	4025	6224	6019	7109	4427	7543	3615
	9496	10014	8937	4633	4410	4284	4848	4363	4889	6615	5119
	11504	12320	16839	9010	7855	8082	4203	6114	5443	4048	9639
	12772	10610	6904	5881	4236	3718	5224	7566	3205	6131	5462
	10927	12616	5728	5269	5758	9751	5709	7048	4849	6667	4985
	8047	6007	6359	11603	5969	4201	6039	4399	3309	7852	3355
	11258	9977	3569	3846	8615	3181	6914	3334	3987	5408	5420
	5500	10295	6329	11617	3458	9154	4523	3298	9187	7565	7976
	8955	8696	4243	9185	8264	9846	5032	7046	4868	5057	5575
	14299	9390	9625	4572	8077	7675	7893	4863	6227	4157	6510
	8960	10195	10799	6900	7973	5229	8298	5004	5069	3017	3467
	10456	11015	9248	5308	7761	3939	6903	7888	5891	4320	7691
	5614	14697	3253	9759	6886	5778	5591	5613	8945	5472	4390
	11725	4088	11033	11276	10491	7119	6160	4762	5097	11043	8256
	11479	9822	7496	4479	4317	5441	5245	3809	4920	4481	2360
	12398	12756	6813	8395	7094	8793	9020	4443	5173	2823	2743
	11176	13535	6758	14159	6516	5387	8202	10209	9222	5319	10019
	12940	5291	11247	9087	4173	7356	8160	4038	7558	10598	2921
	3899	5700	7936	3809	4432	6242	4844	5260	8211	6568	5768
	10915	10855	8456	8252	9378	6273	9717	4963	7516	4092	11022
	6795	11983	2045	7411	3610	2928	8553	4684	8036	4470	8671
	11199	10215	7722	8267	5788	7892	5718	6690	4310	4163	9771
	11611	10150	8373	9566	7428	6496	7170	5942	8033	4451	4083
	10339	9475	7504	4028	3955	6081	3958	4299	2899	4331	4813
	11239	9983	9761	4613	6593	3396	6739	4510	4452	3764	9275
	9319	7980	11500	8276	4411	5166	5559	2958	5903	8700	4283
	6005	2737	6227	10715	5360	6267	11911	8732	4147	12444	6388
	5152	5428	7775	4988	9495	8291	3238	4241	4011	5426	11388
	14335	8482	8986	6530	8241	2908	4296	4212	8869	7608	6295
	12347	8051	9570	9376	5019	4834	5305	4635	8210	5595	3811
	9865	7806	6385	4741	6897	4756	5494	6226	4312	4068	5994
	12958	9141	10798	7619	9165	6004	12818	4317	4676	3177	5797
	8513	9300	11446	5240	7202	12261	7169	9798	2903	3854	10999
	10591	6766	9716	5986	2231	7072	6544	6382	4232	4709	4741
	7166	10238	5331	4350	6333	11377	5584	7444	4428	4667	5295
	11673	5212	6584	6907	10358	6041	6922	2270	9258	6892	9152
	12933	11995	4973	5137	8535	4601	2552	3949	5292	4779	7400
	11533	11501	5730	6616	7607	5150	1770	8169	4502	4741	3568
	11973	4357	12747	8205	7311	3452	12738	5077	2790	5789	8595
	9358	9729	6036	8988	7868	12964	4747	4795	4801	6813	10605
	8824	13919	4218	5859	3850	2494	4021	5602	5475	4720	3640
	14431	6892	8261	11063	8572	3650	3114	3195	2433	4710	4723
	11016	5484	6484	7399	5382	6746	5331	9494	4695	4939	5621
	26496	2540	8561	7744	3769	4295	5170	6011	7941	7347	8663
	12981	4354	10423	5243	8385	5335	5635	3017	5536	11399	12251
	5284	8141	11581	3550	10880	8136	6504	4174	4186	6018	4074
	13257	7715	9220	7547	5488	2010	5757	8132	5439	4020	3051
	13003	9145	5731	5519	3684	9714	2560	7396	5497	9204	7650
	10957	14072	5504	7466	6384	7729	8605	8358	9477	4926	3984
	11821	13262	5741	10860	4248	6277	6564	3557	3516	7079	12131
	9864	7527	4505	6626	4583	6967	6724	6790	4340	6873	5701
	10355	11286	7792	6362	6629	5793	4413	10075	4523	4458	8590
	12405	7330	2882	9590	4390	6355	6224	7066	7952	4977	2798
	11257	7513	10278	8856	6036	6634	5457	7118	5938	6997	4622
	10040	9833	6124	10104	11065	5735	9328	5102	5246	4380	4138
	12176	8948	10248	6865	3180	4122	3435	12773	7390	5528	4071
	13155	11138	8938	8582	3257	13101	7234	6934	6523	6054	5280
	8925	9279	10977	12979	8638	10776	4414	6299	6721	6535	7888
	9125	4019	4629	5237	7917	4375	11717	7941	3059	5179	5894
	16055	8028	9448	5858	9983	5777	3884	11101	16275	4248	4782
	13108	8806	13510	7234	3380	4876	4374	4981	14731	11250	5473
	10782	6281	5288	12090	8263	2861	3230	10527	4391	4837	2385
	12299	4121	3084	3693	7218	8138	1709	3762	9107	6035	4044
	11285	11107	6899	8868	7288	5840	7600	5459	5242	5751	5880
	9240	7106	4764	6077	6765	6906	8757	3737	5180	5480	3255
	9483	7032	5454	3736	4827	10486	4997	8993	3967	5787	3928
	10533	9538	11394	5940	9481	13861	6233	8593	5698	9393	2603
	10804	14167	9849	8796	4873	8098	4410	6462	4910	4075	10463
	10425	7333	5601	8127	5994	11303	4498	4743	2932	5606	2858
	11242	8446	8426	5320	7241	4903	5276	6341	6078	2679	4192
	10771	10857	9221	8985	4817	7472	4907	2746	4626	4030	6148
	8494	7294	4577	5034	6343	7915	11159	4271	5191	3010	3002
	7705	7073	7626	2049	8063	5281	12904	11137	6457	11459	5064
	11234	6936	6146	6090	6989	6294	3807	5781	12142	7171	9306
	17277	5725	10234	7746	6251	10784	6306	4365	6088	5836	4788
	9595	6720	7467	12250	3119	4244	4311	6682	6610	6985	6374
	9902	8175	6829	7934	6336	10052	11847	5388	6723	5657	6665
	9590	11151	5782	10049	6676	5266	7810	8824	4700	5906	6498
	13323	6446	9145	2013	11433	7296	5464	3201	8720	10709	3392
	12321	9212	4491	7089	4874	15053	9147	8986	5661	8497	6743
	10826	10685	11448	7345	7175	5456	4818	4805	4124	12531	8062
	11561	10111	8074	6631	4773	5342	6037	4935	3797	11459	5670
	14592	5896	7103	14276	6264	4995	11209	11584	4004	4451	4958
	7446	10767	12847	5403	6188	4107	6751	6709	8039	11852	6226
	10721	8441	13303	5027	9249	6426	6853	6234	5126	3871	4841
	5871	6054	14935	5397	5005	10922	6458	3519	2698	5058	6874
	3827	4854	7414	8024	8488	7711	5662	7953	2640	5637	4751
	15878	7131	9998	4120	9393	5952	14341	8783	4600	6576	7576
	10097	5727	5890	3856	5673	12489	4940	5241	12217	12236	5706
	10383	12814	10143	6494	6182	11849	10458	7227	6797	5885	3191
	10491	9732	5834	3062	3127	4906	11383	7978	5494	2286	7048
	9186	4807	3980	9319	3265	5965	11858	10113	3523	4266	7523
	10584	11060	7788	11237	5741	2808	3830	6754	3480	3016	5522
	10331	10923	11975	7907	9715	5316	6358	6782	2323	6603	5045
	9680	13680	9695	5957	13718	5147	4086	5996	3140	6222	2595
	9844	6788	5215	13260	5834	5427	6606	4375	3523	4268	9631
	7818	10054	13176	4482	9828	4174	10244	8335	4736	6853	7514
	10452	13375	12409	9680	15045	4089	4748	6172	8995	10773	3764
	5394	12414	9012	14439	4092	7566	6782	5591	5586	4527	4876
	10087	10433	5923	3421	7495	10977	12180	9443	4938	6787	5236
	10558	6167	5556	7925	6206	6398	11305	4767	3949	7083	2762
	12176	6871	13283	5481	6896	7193	4441	5537	2695	7581	9027
	9448	11498	8871	4929	8631	8019	3766	4318	4224	11955	6973
	14450	6864	12354	12573	4525	5564	4000	3126	5175	4071	5266
	11919	9877	11629	6068	12746	6116	5313	7019	7080	4240	5699
	12862	7231	11846	2616	6278	5504	5262	5329	6909	3546	3284
	10526	13708	15115	4929	8986	6316	4881	6370	5784	13453	2993
	3372	8848	14958	12268	12470	5418	4883	8189	4601	11647	3086
	4104	11878	13913	3080	4230	6256	4523	2487	7363	8323	4491
	11512	10602	12515	10098	4416	13366	10698	5024	6780	3330	7366
	12213	7623	7199	6738	8467	8767	9064	5268	5996	8251	4939
	12841	4194	14446	11184	7012	4519	6129	8168	4509	4579	4895
	14143	6540	6451	5164	6262	6812	5976	6326	3431	3822	5180
	10577	10633	11838	6020	7443	3751	5642	6970	9729	6468	6106
	10008	7204	6379	8536	6085	5188	6465	7422	10844	3186	9780
	11587	10434	6372	15298	4671	6960	4849	6713	8626	2650	9710
	8867	12676	7076	4891	10128	3594	5013	4407	8596	3104	6218
	12152	12675	7365	5219	7851	3434	9276	4620	5772	7909	7953
	9641	4823	11372	6111	10322	4719	4700	8851	3913	2841	3564
	6608	9501	11207	5887	5310	7904	10521	5971	4311	4891	4884
	7665	9849	5725	6800	8869	2395	9896	4956	10923	4875	4977
	5945	11675	10521	12839	11963	5926	4204	4386	5423	5381	4305
	8700	11109	4682	11296	11430	11247	9148	5512	4522	3996	3843
	11002	5470	10831	7277	3614	6385	6193	5748	7141	4130	6146
	11809	16907	10854	10448	3428	7154	5964	9073	5586	12696	5057
	10188	8736	5668	5545	12425	8610	4970	3038	5600	5370	7129
	9946	11568	4734	7036	3743	8396	3658	9388	3219	5349	5691
	15812	7159	5449	6509	4560	7293	4979	5984	9744	6519	4736
	12618	10768	6307	5842	11052	3397	8912	6707	5007	5717	8798
	9622	9618	3551	4312	13576	2953	3688	11350	5203	5521	6274
	11119	13725	5752	5081	4508	7148	10017	2593	3443	4954	6111
	12143	15107	12338	11566	4387	6312	3548	3927	5238	8661	3389
	11691	11481	11567	6427	13772	4236	6620	7566	5729	6079	7061
	10354	18052	9002	12637	9020	5357	4933	5966	6816	4196	9817
	8009	9805	9697	4354	9749	7664	6624	4655	9408	4561	5579
	11188	11229	9203	5160	11012	9406	9050	3306	4345	6563	5375
	12986	13314	5582	5205	2817	4069	3156	6942	4887	10465	3496
	11949	5745	6897	9414	4490	6262	3335	5607	6613	5488	7247
	11744	8922	8128	10929	6372	5795	5970	4385	3533	6193	2958
	9232	11196	9007	13563	3605	6413	6106	5326	6483	4425	9878
	9662	13190	11067	10829	10764	4624	4025	4673	2775	4168	4987
	12411	10121	11637	15429	3843	5879	6436	6727	3991	3771	7555
	8788	12898	4455	12371	9987	7068	6429	8115	8347	5138	3964
	11227	4878	14307	9537	9355	5488	5355	5397	4454	5676	4759
	9077	13010	5778	14662	4461	8067	4161	6596	3820	9398	10179
	11554	3091	9130	5331	5954	5895	5953	6288	6529	5201	9654
	10741	10412	9016	10702	4619	3343	4694	7268	5947	2993	6954
	11160	11618	5653	6082	5660	5257	6767	8538	11188	4661	3803
	9392	14488	8222	5776	7301	4951	8888	6971	6378	7961	13075
	12147	6577	18959	10368	3814	8570	7052	4298	10187	8213	5364
	9614	8915	9915	6002	5696	7585	4173	4932	5246	5076	6616
	10328	10373	4094	7260	6117	10068	3536	10345	6320	6298	10597
	10064	10575	4837	4376	3886	5801	9353	4422	7623	3674	8039
	6740	10295	5391	4596	5107	7768	7612	6578	8968	8691	4473
	10624	11354	6036	11784	12038	8053	6503	9580	8006	5384	5298
	11769	13033	4139	2709	7710	5449	7469	6792	7883	3537	6391
	7453	8446	7188	13071	6284	6514	4903	6114	5237	6487	12397
	10124	8951	10356	9497	8648	6934	4612	4358	8574	9365	6068
	4190	6809	10717	4325	11407	4328	7687	5577	3048	7088	7064
	9341	5479	5388	5663	6329	8719	8702	11487	3545	5915	8410
	9976	7141	11155	4772	8743	6815	7717	4640	5416	5760	9720
	8505	8988	6138	7872	6903	5982	4711	6371	3633	3648	5277
	8982	10385	6803	5020	4795	6817	7300	3417	6365	3446	8328
	5647	13177	10387	4660	6687	7594	10019	5350	14672	4335	10846
	9825	11406	11323	10358	8288	6912	6660	5807	8360	6166	3509
	11433	4935	8359	9869	3293	10240	8497	6281	2771	3990	5398
	9149	9581	10683	7314	6518	3437	2963	6597	4167	7181	4916
	18070	9614	2779	3978	3970	5469	5739	6350	3350	6301	6711
	9294	8602	6450	8258	8943	5295	5646	2611	6272	5600	12800
	10019	7827	6132	7339	3753	9716	10337	11987	7211	5840	2367
	8567	3699	9238	11447	4027	4425	4270	4498	11084	5882	3804
	12953	11070	8527	9932	11210	6737	5829	4684	5023	4446	6185
	14659	14084	15771	4575	7325	7732	4144	5563	4958	5960	3936
	7988	9034	7332	4939	6954	6880	6445	6233	3818	5285	10196
	9804	4894	9852	7198	9595	10388	13870	4997	1426	8154	5663
	12324	6612	12361	13981	6967	5542	7105	6022	7229	8838	10847
	8997	5171	8401	5223	7621	10110	6737	5190	2681	5574	3234
	12695	8400	4805	4948	3040	4414	6344	5804	5516	3652	4863
	6858	7935	10754	7946	8848	3768	4578	3563	9891	10473	4325
	9874	9070	15017	2607	7972	4925	2797	8794	6041	4152	3751
	12270	9335	11356	7777	8685	1999	4419	4994	3928	8713	5491
	11491	9975	4805	5837	6488	8716	9350	5363	6766	7758	9042
	11984	6763	7251	6736	8207	4433	6158	8087	4809	6990	5461
	12801	11064	9281	3796	5598	4724	4326	3721	9534	4455	6680
	11130	8196	6024	7506	6268	9495	4567	9839	5109	7909	4362
	11241	7867	3756	3710	9834	5356	3869	5296	4158	6699	3876
	7269	11231	6030	8392	4778	7943	7173	4752	5194	4767	3752
	10480	8540	5153	4901	5433	7587	9322	4156	12028	4974	5109
	7941	10736	5235	7049	7439	6450	4804	8770	7124	6517	4478
	8663	7768	7005	6912	9258	5447	7880	4939	5448	5238	7577
	11064	2733	12410	6926	5882	3585	2670	6020	8387	8958	5149
	13483	9756	11975	7171	2455	8555	7211	5569	6872	3766	6060
	13772	8050	7675	10134	7846	8744	6407	4354	5807	12710	3389
	13189	6620	9092	2966	5341	7438	4063	8591	3880	4215	7061
	12341	4820	7503	6368	7427	7345	6198	6313	14009	4177	9817
	13220	14249	4748	7268	4853	7359	5217	5424	11667	3217	5579
	11382	6514	6796	6978	4800	5344	3334	5993	4024	3961	5375
	9452	8986	5050	9882	7085	7426	8336	10520	6468	8274	3496
	11095	5599	7294	4267	9775	6654	8267	9373	5068	3740	7247
	11421	9981	4539	6164	6199	6026	7338	10503	4869	5541	2958
	10561	5140	9841	7850	2595	5897	3488	9503	5595	3977	9878
	10335	7563	6673	9917	6811	9188	7943	10566	3900	2573	4987
	11805	9968	9399	5703	7910	6267	6251	5829	6752	4189	7555
	14118	7895	7162	6689	12092	4094	4055	9189	5535	6166	3964
	11530	8268	8654	11049	2982	7390	6231	5020	6637	5023	4759
	8769	5215	4796	14175	12575	4042	7081	4536	6427	7485	10179
	5414	6239	10735	5803	6836	8014	8795	5372	4136	7720	9654
	19659	7066	10390	5133	4611	5694	2596	4365	3433	4717	6954
	9922	10401	6461	8918	5044	2899	6679	3459	4991	7589	3803
	4494	9183	6453	9889	4232	8077	8291	4365	10188	14224	13075
	8254	5726	8226	5324	8824	12792	4778	4087	4985	6917	5364
	11915	10376	3957	13003	4009	3466	6380	10164	6400	9645	6616
	16048	11137	7733	6662	9377	7632	6459	4239	5403	9288	10597
	13249	10154	12871	3139	7536	6760	4134	5351	5566	1744	8039
	13371	8410	9393	5045	5302	4323	4550	5809	7073	10494	4473
	13357	10372	5179	10803	7681	5988	15362	2881	8224	2669	5298
	10537	9986	10911	10203	9279	5531	10219	3645	3025	5457	6391
	13569	5703	7937	7234	5439	5205	6509	12724	4196	5473	12397
	10489	5520	9674	9421	9101	12372	5279	3734	2671	5768	6068
	7677	5615	7485	7239	5237	5355	3338	4985	8076	11707	7064
	8808	4893	4666	2553	5713	9203	10870	6077	4972	9506	8410
	7684	11238	10241	6162	5881	5538	4642	5185	4941	4517	9720
	13915	11913	5737	10024	11130	6819	6117	9270	2461	3897	5277
	14356	7176	7628	7036	4913	13894	10645	2908	2696	4705	8328
	11131	11421	8816	8049	4996	6076	6469	10854	10572	5965	10846
	7611	11421	11641	10607	5612	5372	5455	4215	8713	5854	3509
	12160	9676	4884	2861	9755	4833	11029	6434	5902	4909	5398
	13205	6914	8370	6036	11585	5499	6380	11219	5609	6497	4916
	11494	11040	7394	6856	9513	5445	5504	5858	2957	6098	6711
	13234	13528	6222	5972	7123	9454	6746	7480	2658	6476	12800
	9112	10623	13195	20751	7403	3495	5957	7279	3264	5785	2367
	10340	12684	13523	3445	7781	5559	1786	5559	3181	6070	3804
	13305	6636	13182	4521	4682	12359	14139	6978	6522	8778	6185
	12154	8784	5853	6329	6644	6054	4963	6254	7054	9173	3936
	9988	10703	13268	5160	6540	5605	10073	10213	6039	3203	10196
	14565	7000	5295	7521	2985	4919	11311	8917	5410	3003	5663
	6103	9116	10665	6263	4803	4910	11518	11324	4854	2681	10847
	4259	6139	7410	4549	11847	5643	5654	4277	2942	8372	3234
	10416	7762	3552	6538	10842	6106	5477	6381	5332	10294	4863
	9047	12153	9411	5542	7490	7202	5734	5125	8369	8992	4325
	12258	17153	4381	3480	12045	3318	4901	5637	7888	3489	3751
	9452	10305	11221	11738	12255	4419	8255	7537	7797	7460	5491
	6819	9504	4400	13708	3702	8907	7057	6234	6317	4818	9042
	8810	7232	9361	8817	8077	10807	6836	7765	3623	7130	5461
	8421	7004	12378	6048	5719	3514	12726	12338	10414	10842	6680
	12891	12714	7235	11489	7032	6027	12323	4053	9692	5187	4362
	3426	7406	7764	4626	10460	7818	4225	6634	7302	3460	3876
	4306	2315	3677	10262	6105	6091	4849	2901	5842		3752
	11665	8350	12395	13145	10172	6764	3884	6195	4263		5109
	11282	12275	10658	6245	5465	1803	5881	8182	9515		4478
	12673	8502	13450	6220	3490	9695	5623	5203	8527		7577
	12743	5175	13987	4571	10773	9394	4321	10208	8936		5149
	10655	11612	11209	6596	6027	6257	3828	4451	6382		6060
	13913	5974	10788	13332	4687	11227	4105	3935	5908
	8474	11519	13108	11129	10731	9904	7849	5902	3818
	11277	12816	11064	8057	4354	4657	5401	5518	5070
	4169	7949	10723	5920	5837	7280	6840	5475	9813
	8708	12472	5210	9347	8104	5198	3640	9041	4450
	9530	11352	10544	12247	5934	4323	6462	4638	5598
	13901	10783	4146	6319	5415	5006	6347	2444	5167
	10098	8706	14383	7751	11761	4227	5034	6672	2991
	5358	13961	3579	5849	9856	2800	9179	7270	5721
	9772	9859	7613	8282	10585	4730	4576	5418	2890
	9136	11452	10314	10021	7728	7342	10419	5008	12428
	10936	10008	7879	10385	7441	2336	7826	6543	4282
	10001	12132	10236	5265	15110	5440	2871	4291	4807
	11643	13165	9999	4451	10663	9780	7607	4567	4068
	10629	11270	4829	7649	4408	4443	5130	2218	5855
	13435	6678	11762	7061	3321	6103	5771	12106	6858
	9304	10084	3640	5885	11959	9241	5036	6951	8323
	3496	7069	10759	10932	5050	9219	2713	7772	10849
	10983	10894	7209	15053	5959	9326	3008	8392	3014
	10110	8206	7843	7468	9451	2586	7943	2274	7567
	12213	10029	5440	12438	13065	3614	3743	3525	3817
	10470	11492	4976	5128	4822	7339	8627	8770	3945
	11944	11183	4548	10289	6883	5950	4278	5104	3372
	12142	4830	5557	9433	10747	5350	5258	5007	4364
	12242	13470	7231	12367	8344	6494	9426	6987	4071
	6303	5377	10417	6278	13458	4024	10125	5515	7360
	12331	13439	9267	4241	11536	10818	2552	2872	6527
	9584	9087	9670	12999	3365	7537	4321	4808	7014
	9610	15180	9605	7715	5197	7140	7250	6103	5243
	12497	4915	7118	13021	3841	5478	9298	7170	5008
	15314	8018	5255	4754	5259	4401	5844	7093	9832
	11712	9129	7665	6871	7733	6035	5197	7189	6276
	12343	8581	6848	6822	6066	6075	6857	5013	4813
	8072	10031	12082	9178	10978	4703	5115	6028	4917
	9878	12721	11891	10362	11550	5869	4918	7229	12203
	11272	10777	10066	7640	4139	11597	3420	8817	8642
	10995	11669	6632	5628	6192	4416	6658	5683	6728
	13442	8882	15251	12466	4882	3758	5678	4220	7409
	10653	8177	7127	12951	5801	4978	10014	4051	8179
	14082	6407	8541	11090	7372	2750	5574	8568	4568
	11003	8469	10367	12624	4326	7132	4798	4360	11680
	14353	9064	4277	3706	5292	11257	4823	8233	3684
	12553	13857	6786	11494	6461	10352	7784	7820	5351
	4871	9086	20631	5095	4801	5255	8187	5418	4933
	6010	5652	8481	3184	8924	7804	6279	5901	4563
	10337	7374	5462	10324	4042	5639	8014	3815	4254
	4687	6345	6647	4731	8502	4623	6520	4611	9726
	12615	8277	5252	7256	10060	6887	5694	9509	8436
	14031	10068	7455	6780	4700	5023	6860	5460	1830
	14253	5929	4246	4227	7552	9340	8663	4997	5786
	14241	7984	9872	13083	5212	4847	8984	3666	3490
	10420	16914	6979	4576	6985	5005	6570	6040	5786
	16513	8833	9883	7674	6489	6366	9529	5831	4057
	14969	6755	4634	10458	5876	7729	8977	6025	10403
	11407	9135	4897	4814	4712	6048	7462	6433	5188
	9795	6395	7839	5986	10075	6696	6416	5344	5845
	14051	7246	4627	3967	3680	5226	5424	2508
	8062	8545	8037	12428	6226	5132	4218	9269
	8406	10720	7994	4015	4884	6052	6204	3813
	15658	9676	7849	4825	9047	7713	7816	5361
	11878	9342	8744	8859	3034	3850	3303	3552
	10428	3380	3542	11071	3806	2121	5173	5453
	11541	11003	7638	8502	11149	6151	5952	4946
	7599	8042	9588	5006	7658	8265	4808	9489
	14684	6399	8299	8915	5048	12465	8718	6263
	11189	9174	7308	7993	8335	6299	7399	3576
	9100	6418	10522	13108	8511	8967	4494	2344
	5055	9781	8224	10017	10601	3899	6809	8711
	11782	10277	9636	4942	3295	6622	2494	4941
	11573	2058	4834	5057	5909	6295	2576	4793
	11311	5753	8370	9007	8729	4530	3451	4975
	9802	8295	7182	7369	1902	8295	11218	2787
	11731	8994	16097	6236	5579	5699	5266	10788
	7131	4887	11441	5840	4201	3809	5956	4348
	9210	11701	9063	9792	4359	7783	4533	2521
	11247	8422	4144	4800	5388	6325	6818	3893
	10705	9848	6673	5265	11278	4989	5533	5359
	9363	10187	11679	4842	4025	8363	10488	6809
	10147	10942	6805	6017	5261	6674	4628	4959
	5110	7128	6912	4320	3743	5021	7334	5383
	8504	14090	6761	5682	6937	2590	3244	5140
	11246	13736	6196	4395	6187	7681	9681	7796
	10226	7689	5297	7213	3511	5823	8960	4746
	10329	4589	7553	10194	6822	4372	4535	7820
	8305		9364	8592	5857		5845	3858
	12040		8626	5999	5543		4399	8936
	8643		10804	11306	5951		3815	8243
	10544			10461	4389		10076	11423
	11427			10865	6257		5662	6813
	10269			3069	8824		8339	9465
	11179			3935	6442		3636	5471
	5320			6812	1739		8139	10765
	9809			7528	8279		4628	2747
	9463			9685	7394		5987	3865
	10740			7979	10646		4446	4872
	11903			7928	3061		7343	5534
	12912			6386	11136		8749	6759
	10884			9236	5027		4779	14966
	10813			8070	2077		4070	8140
	11383			6481	4601		5427	4641
	11136			10201	4586
	13258			8818	8666
	15479			4406	4778
	10484			4796	6895
	13273			7068	9784
	12542			8876	5499
	10987			4756	6262
	10438			10877	7576
	12849			8185	7104
	10034			3992	7266
	12154			4718	4555
	12394			5682	4991
	4260			7563	6621
	15096			6901	9252
	13976			10591	3883
	11683			6630	4868
	9619			2482	4898
	9579			7989	6997
	7872			9880	9677
	11559			7919	13649
	10084			7782	9777
	9701			8546	5597
	10911			2485	4436
	11780			7950
	5814			5389
	12552			4548
	13200			19460
	5827			4005
	10763			9373
	9276			7276
	10334			5645
	12663
	9622
	5618
	8332
	11246
	10399
	9738
	11051
	11465
	13642
	12994
	8419
	14188
	11982
	8150
	13370
	10669
	11178
	5976
	12541
	9202
	9801
	12599
	3749
	12211
	10603
	8553
	11903
	10234
	13106
	9421
	7279
	7933
	9833
	8752
	9982
	10276
	10745
	11640
	9361
	4738
	9373
	9895
	10594
	9013
	15794
	11941
	8749
	13673
	9337
	4854
	11702
	10932
	9772
	9955
	5236
	12251
	13270
	15134
	12670
	12553
	5952
	11910
	11377
	10438
	10462
	3498
	8674
	6038
	13955
	13046
	14274
	12932
	12781
	12765
	12642
	9586
	11427
	7766
	15205
	12612
	13271
	10108
	14478
	10267
	6039
	9920
	11701
	11827
	7725
	10315
	13229
	11698
	12088
	8983
	11829
	10372
	7820
	9605
	12715
	7326
	14482
	10791
	5046
	15269
	10164
	10428
	11332
	9755
	4790
	8168
	9259
	9742
	4470
	3642
	10214
	11544
	6214
	5109
	5585
	10321
	8728
	12929
	10698
	4498
	13832
	16114
	12107
	10264
	11997
	13023
	10831
	10937
	7790
	9417
	14211
	3422
	12170
	9239
	9522
	7930
	10309
	11571
	14151
	9593
	13528
	14816
	8556
	11679
	14963
	14729
	8058
	11223
	8700
	7276
	11242
	13496
	10655
	13746
	13487
	11747
	9578
	6467
	8594
	15600
	8672
	10737
	11602
	13312
	5888
	9694
	12645
	11360
	4892
	6939
	6150
	9177
	7038
	3427
	14109
	7397
	5851
	12477
	10271
	11511
	6800
	10323
	8453
	12873
	9651
	13229
	8761
	11341
	11522
	5235
	8487
	7164
	11968
	9124
	6525
	7876
	10946
	9715
	10615
	12926
	5721
	6574
	6456
	13322
	10270
	13006
	12606
	10397
	16205
	11308
	11798
	10627
	7298
	12091
	12068
	14011
	10522
	12926
	12375
	12728
	10283
	10754
	14938
	4290
	9867
	13306
	7165
	3959
	4464
	11532
	13237
	7596
	9585
	13211
	10088
	5392
	11749
	10793
	12847
	6870
	11485
	13741
	10195
	10384
	12439
	17282
	8807
	10117
	15951
	14400
	9305
	12611
	9395
	12285
	8509
	10542
	12105
	12055
	5965
	9668
	12098
	9125
	10540
	8290
	12249
	10455
	9827
	8956
	10290
	10009
	9858
	8409
	9956
	9490
	5622
	12707
	8986
	10516
	11877
	14301
	12850
	9310
	12718
	10862
	10952
	14590
	13293
	11747
	7852
	11616
	5832
	9371
	14582
	10550
	12152
	14494
	14097
	12239
	11999
	11201
	10313
	13749
	8864
	7178
	13446
	19568
	11982
	13478
	5542
	16155
	15672
	12203
	13525
	6058
	13093
	11074
	17510
	10863
	3690
	10710
	13094
	10965
	15735
	8107
	7824
	11084
	8919
	4193
	8158
	14363
	9139
	14491
	11037
	13511
	11219
	11468
	6332
	11604
	7938
	9707
	10666
	11174
	6408
	10363
	11589
	8526
	6261
	10982
	10654
	6599
	10686
	11546
	12583
	13937
	15087
	9408
	11274
	8756
	7100
	10805
	12006
	8813
	6802
	10771
	7797
	9828
	11784
	12810
	11248
	11968
	11450
	11205
	10736
	8178
	5339
	5473
	15387
	5155
	11770
	13797
	7771
	18238
	10038
	7720
	10834
	11844
	10760
	8337
	4748
	5596
	13776
	18246
	14040
	11028
	14747
	8832
	12031
	11964
	9961
	9223
	5707
	14053
	9931
	4435
	14717
	10985
	9217
	12361
	7700
	7013
	9518
	9937
	13046
	8969
	4325
	12259
	12540
	6667
	12409
	4508
	11979
	12692
	9721
	6563
	12305
	11065
	14107
	12369
	11293
	14427
	16263
	10332
	11146
	12218
	13818
	6016
	13202
	8944
	13218
	11519
	11848
	11022
	12263
	10708
	15522
	9912
	9482
	13145
	11202
	12719
	10394
	11716
	10685
	10785
	11051
	10265
	9102
	10111
	4932
	7772
	12429
	10767
	11835
	12141
	9931
	12835
	10696
	8833
	10061
	13013
	12008
	12149
	9085
	10978
	10603
	9741
	11505
	10707
	11268
	9721
	7169
	8865
	12400
	10220
	11869
	7765
	13711
	11381
	12843
	12262
	3700
	14224
	9280
	10050
	13589
	6388
	13006
	12956
	9315
	11931
	11823
	12947
	12147
	8888
	11185
	8890
	11533
	11821
	10314
	11753
	16388
	15250
	10639
	13516
	9517
	15741
	7512
	11326
	9748
	13953
	5208
	11184
[truncated: 1,915 more rows]
