# Supplementary material for: Membrane-mediated dimerization potentiates PIP5K lipid kinase activity
Source: eLife. 2022 Aug 17;11:e73747. doi: 10.7554/eLife.73747 (PMC9470164; doi:10.7554/eLife.73747)
Supplement: Figure 1—source data 5. [file elife-73747-fig1-data5.xlsx]

## Sheet: Figure 1G
Figure 1G
	Single mNG-PIP5KB particle intensities (raw data)												Frequency distributions of mNG-5KB molecular brightness
N =	287	305	307	305	332	313	254	263	201	267	265
time =	0 sec	1 sec	2 sec	3 sec	4 sec	5 sec	6 sec	7 sec	8 sec	9 sec	10 sec		mNG-5KB intensity (bin center)	0 sec	1 sec	2 sec	3 sec	4 sec	5 sec	6 sec	7 sec	8 sec	9 sec	10 sec
	7186	7035	10955	3700	4381	4467	4988	5396	5054	4791	7248		2000	0.00348432	0	0	0	0	0	0	0	0	0	0
	7015	5619	5586	5036	8194	9029	11427	5206	4326	6385	3009		2400	0.00696864	0.00655738	0.00651466	0.00327869	0.00903614	0.00638978	0.00787402	0	0.00497512	0.0224719	0.0113208
	10184	4534	5797	4362	4903	6433	5096	3852	3062	5081	2996		2800	0.0209059	0.042623	0.0488599	0.042623	0.0301205	0.0319489	0.015748	0.026616	0.0447761	0.0411985	0.0415094
	4689	5684	6183	5141	3481	8515	4736	3352	4916	3316	4161		3200	0.087108	0.0819672	0.0912052	0.0459016	0.0451807	0.0511182	0.0669291	0.0798479	0.0895522	0.0786517	0.109434
	6041	5192	5868	5861	5525	6023	6052	4921	4550	3560	3273		3600	0.0731707	0.0819672	0.0879479	0.111475	0.0753012	0.0830671	0.106299	0.0722433	0.0597015	0.101124	0.090566
	5776	6156	5095	7539	2883	3870	6764	4567	4769	5114	6208		4000	0.097561	0.104918	0.0944625	0.140984	0.0783133	0.15016	0.141732	0.190114	0.0995025	0.146067	0.116981
	4885	6375	5422	4747	3299	3400	3745	4704	4347	2990	5297		4400	0.0836237	0.0918033	0.140065	0.104918	0.123494	0.166134	0.145669	0.152091	0.164179	0.116105	0.0981132
	4086	5175	5473	3669	3721	6119	4423	4116	3861	4608	3246		4800	0.111498	0.134426	0.136808	0.118033	0.14759	0.124601	0.137795	0.0988593	0.134328	0.153558	0.154717
	5673	3979	3321	5181	2572	4038	6407	6640	6819	4788	5179		5200	0.0905923	0.121311	0.0944625	0.127869	0.105422	0.111821	0.133858	0.144487	0.144279	0.123596	0.124528
	5551	3746	2599	4590	4844	3748	3978	4382	5305	5836	3999		5600	0.125436	0.095082	0.0814332	0.0852459	0.105422	0.0734824	0.0826772	0.095057	0.0995025	0.082397	0.0830189
	4374	4409	5451	5431	3678	3982	5679	5196	4132	4280	5722		6000	0.0766551	0.0885246	0.0586319	0.0754098	0.0903614	0.0702875	0.0708661	0.0570342	0.0646766	0.0411985	0.0490566
	6328	5103	6576	5009	3515	5182	4407	5017	4438	6744	2922		6400	0.0696864	0.042623	0.0488599	0.0622951	0.0753012	0.0415335	0.0511811	0.0418251	0.039801	0.0486891	0.0490566
	3169	7669	4912	6428	5133	7202	4108	5158	5825	5952	2888		6800	0.0452962	0.042623	0.0456026	0.0229508	0.0301205	0.0319489	0.011811	0.0190114	0.0298507	0.0224719	0.0301887
	5391	5181	3976	3785	4150	3229	3699	5412	5414	5936	3403		7200	0.0383275	0.0229508	0.0228013	0.0163934	0.00903614	0.0127796	0.011811	0.0152091	0.00497512	0.011236	0.00754717
	4983	3427	4973	4614	5150	2800	4839	4845	4381	3106	5409		7600	0.0243902	0.0163934	0.00977199	0.0229508	0.0060241	0.00958466	0.00787402	0.00380228	0	0.00374532	0.00754717
	6352	3616	5085	3757	5970	7522	4194	3156	4729	4548	3516		8000	0.00348432	0.00983607	0.0162866	0.00655738	0.0150602	0	0	0	0	0.00374532	0.00754717
	4273	3861	4576	5004	5556	5439	4469	4966	2757	4158	3802		8400	0.00696864	0.00327869	0	0.00327869	0.0120482	0.00958466	0	0.00380228	0.0149254	0	0.00377358
	3469	5941	5318	3761	4087	7472	6757	5593	3608	3262	5306		8800	0.00696864	0	0.00325733	0.00327869	0.0120482	0.00319489	0.00393701	0	0.00497512	0.00374532	0.00377358
	4822	3654	4201	3331	7032	2888	3953	3982	3235	5140	3043		9200	0.00348432	0	0.00325733	0	0.0060241	0.00638978	0	0	0	0	0.00754717
	5402	5084	2665	3948	3914	5062	4973	5127	4768	5186	3480		9600	0.00696864	0.00327869	0	0.00327869	0.0060241	0	0	0	0	0	0
	5176	4687	2997	4001	4934	4863	3681	5201	4139	5557	3144		10000	0.00696864	0.00327869	0.00325733	0	0.00903614	0	0	0	0	0	0
	3917	3533	4395	5249	5955	6876	3985	7172	5911	5063	5692		10400	0.00696864	0	0.00325733	0	0	0.00958466	0	0	0	0	0
	3672	6203	4588	3235	5133	4851	4591	5458	6360	5286	4062		10800	0.00348432	0.00327869	0.00325733	0.00327869	0.00301205	0.00319489	0	0	0	0	0
	3132	3006	3925	5683	4799	5389	4873	3950	3308	3405	5341		11200	0	0.00327869	0	0	0.00301205	0.00319489	0	0	0	0	0.00377358
	6178	4674	3296	7315	5187	5913	4856	5404	5324	4353	6359		11600	0	0	0	0	0.00301205	0	0.00393701	0	0	0	0
	4655	4112	5128	3058	6434	5985	4791	5044	5115	5518	5305
	3956	7553	3464	6147	2998	3232	5122	4472	5042	4641	5561
	4642	4118	4882	5019	2914	7289	5732	3667	4521	4853	4585
	2609	9917	6095	5123	6264	5864	4495	5230	4195	4111	4834
	4556	5488	3849	5499	6419	4686	6222	4682	4449	4666	6289
	4706	4785	5299	4896	4744	6631	8852	4591	4250	6337	3110
	3426	4652	2744	4630	10119	4711	5382	4115	3899	6885	5654
	6922	5161	7047	6280	5767	5666	5436	4675	4425	4910	4465
	3429	6680	4808	3123	5066	11020	4282	5106	4586	4586	4862
	9663	4369	6312	4769	4914	5068	5281	3628	5408	4626	5015
	5118	5872	5641	3265	4244	4012	4032	6612	3826	5667	4705
	4821	4084	4456	5085	3570	4489	5304	5373	5438	5708	3200
	4501	4356	6302	6160	3446	3651	5931	5026	6512	4760	5512
	3349	6835	4341	2869	4228	4687	4333	3845	5234	3646	3601
	4664	4703	4362	6539	3857	3145	5176	5985	4567	5255	3543
	5452	2744	4485	3864	4501	4059	3877	3438	3175	4956	5621
	3144	5120	3065	6094	4151	3808	6446	4323	5140	6057	5204
	5656	5766	3073	5948	4592	4180	3757	3795	4440	3653	3139
	4562	3999	4836	4189	6129	5893	3259	4152	2953	5036	2935
	4724	5166	4262	4834	4321	3764	4542	5144	3255	4297	4141
	3190	3213	6742	4402	4105	5757	7640	5089	3523	5216	2921
	6739	3363	3278	5837	4381	4860	3459	6038	3536	5133	4616
	5644	4934	6117	3525	6080	5848	4006	6319	5435	4681	6437
	4949	4781	3340	3784	8414	2821	4105	3334	5530	3616	6758
	4949	3076	4084	3373	2717	6681	4152	5646	3936	3665	4093
	4375	5420	2831	4891	4635	4364	5356	4640	5846	3712	5988
	4081	3032	3924	2886	6426	6252	5490	4750	4314	3289	7978
	5545	5053	6370	5088	5062	6529	4944	3262	4482	3357	6720
	6120	3757	3774	3696	4885	5059	4351	3876	4339	4999	5310
	6073	3306	6826	2913	4665	3281	4737	4142	3778	6411	3600
	7038	4859	4822	2784	4870	6438	4316	4172	6967	6536	5102
	3913	3437	6690	2997	4390	5945	4496	4716	4679	4760	4456
	3298	7149	4584	5716	5998	5249	4795	7161	3671	4122	3543
	8215	3256	4617	4671	4521	5278	4610	4157	4701	8652	5455
	5288	8533	4219	3805	5842	5366	4289	4432	4291	4046	4691
	5482	5621	5481	5194	3533	4179	3304	3874	4339	2471	6437
	3732	4422	6441	6996	4767	6704	4321	4118	5141	4824	3259
	7115	6552	4744	4612	11614	10431	6478	4943	5011	5457	4497
	10285	4801	4801	5580	5172	5944	5829	4347	6592	2796	4747
	6911	7180	4758	6516	5956	4579	5527	3662	6167	3729	6021
	4386	4054	5592	3101	3879	3989	4358	3740	2764	7563	4778
	5006	4331	4529	4131	3225	4147	5031	3997	8690	8047	5107
	4282	3977	4353	4685	4148	5548	7152	4464	2989	3306	5228
	7764	4878	5304	5970	4300	5872	4838	5091	3478	4134	5110
	3165	4882	4078	6304	2636	3276	3343	3976	4945	3519	3309
	4196	2682	4522	6058	3638	4040	3929	3728	6625	5618	5662
	5443	4369	6056	4265	4904	4185	4870	6432	6005	4855	3439
	3676	5250	5410	5389	7408	4249	3513	4983	6733	4775	4286
	2199	2778	2752	5831	5246	3887	3515	3184	6352	4195	4896
	6803	4893	3212	3973	3944	4190	4142	4522	3911	3546	6003
	3734	4323	3572	5274	5604	6635	3988	4988	5344	3924	6231
	5890	3479	5345	6257	4368	5481	2600	4847	5059	4460	5062
	5735	5555	6640	5084	3518	5281	4678	4090	5072	3424	4744
	5172	3680	3938	6498	3427	3480	2994	3967	4848	3477	5624
	5618	5764	3132	5791	3539	4943	3574	4194	4707	5480	4727
	3824	4684	8178	3941	7880	3815	4743	3823	2879	5669	5337
	3088	4433	4170	5074	6200	4196	5073	5553	4693	3982	4583
	6090	5081	4067	3919	5540	6738	4411	3814	4556	4526	2992
	5657	4191	7184	6294	4239	6462	4025	3943	4857	6575	5636
	4941	3961	5929	2914	5505	5101	3061	5144	3298	5180	4447
	5826	3234	7805	3531	4858	3844	4667	3874	4249	4030	3247
	5795	3585	3137	4999	8686	3688	5491	3049	4519	3209	3866
	5027	4780	3408	3999	4959	4249	4771	4498	3433	7381	6285
	5373	6291	5264	5209	5932	3762	3575	4986	3339	4338	4649
	9989	4649	4980	2911	6172	6194	5595	3973	5785	2435	5817
	5749	7972	6163	5938	6146	4692	5818	4115	6345	4920	6298
	5085	6102	3474	3516	3536	10571	4102	4012	5794	4824	5157
	6306	5630	4461	4427	6063	5537	3160	3779	8291	5379	3673
	7461	6183	4731	3973	6020	3577	3430	3343	4170	5113	5360
	3520	5777	4310	6453	4852	4346	5644	7711	4782	3044	3085
	6036	6213	4751	6337	10862	3939	5155	4481	2583	6594	2829
	4020	4946	3632	4400	5353	4764	4293	4678	4440	4689	4504
	4818	3149	4471	6261	5513	4082	5208	4358	4688	4274	5635
	3642	2489	4964	7497	4632	4642	4478	2922	5154	5488	4203
	6300	4233	2646	3520	5054	3835	3849	5707	5518	4533	5584
	3855	6287	6472	5642	6600	2759	4097	6265	5862	4048	3964
	6239	3234	4617	4591	4922	3198	4672	2609	3082	2825	4702
	5343	3540	3855	2755	3077	4606	4535	5752	8301	3945	7493
	3974	6076	10533	3243	5299	3426	4919	4327	5750	5479	4788
	3179	4702	5259	4638	3710	4520	6179	3619	4371	3688	7094
	4876	5623	6168	4637	5100	6892	5282	5730	3114	5221	4573
	2963	2622	7162	6519	5080	3758	3984	4284	3647	6428	4791
	5097	5398	6823	3885	4413	4056	3549	5030	3520	3997	4308
	5830	6208	6813	4879	4042	4590	3784	3337	5002	3927	3696
	6464	3183	2865	4510	3264	4497	6413	2729	6560	6016	4744
	6944	6279	2697	5242	8204	4340	6147	5139	4416	5777	4546
	6858	3681	5180	4465	4281	4740	4048	6316	5102	4086	6173
	6336	3867	4362	5227	4682	4075	4579	4659	5724	2920	6174
	10209	4612	6112	4987	6459	5982	3676	4034	5393	4074	5668
	6224	7930	4439	6411	3709	3404	5939	4519	5151	2683	5155
	4292	2964	6725	5452	4659	4753	3417	3799	5614	3806	5305
	6625	6191	3673	6302	7052	5119	5314	5228	4919	3475	2860
	4912	3986	3257	4757	5573	6273	5185	3854	5099	4030	4800
	4391	10623	6712	4870	4416	6928	4509	4439	5981	6699	2790
	5873	7533	3131	4048	8131	4986	4001	5063	2889	5086	4691
	6298	4944	3073	4313	5397	2785	4364	4688	7104	3769	3745
	7206	4633	4161	5084	6588	5578	5329	6423	5633	4802	8660
	5495	5514	4946	4995	6233	9319	5063	5403	5007	3044	4798
	5446	5413	4350	5065	6963	5745	5145	3055	3270	3208	4649
	4276	5571	6378	4401	3513	5002	4567	5235	4195	3868	5161
	3644	4888	4325	2969	6415	4509	5020	5441	4458	4208	4731
	2878	6249	2738	3943	10196	5167	4508	6061	6562	5928	6434
	4028	6101	8112	6389	5943	4016	3081	3075	3781	4243	4568
	5839	3136	3787	4744	4962	5235	4314	5709	4502	5106	6806
	3130	4675	4911	6671	5859	4850	5651	3809	3327	5319	5324
	6390	5182	3721	4193	4904	3780	4823	4218	4156	3925	6744
	3993	7382	3589	5425	3574	2653	5994	4257	5030	6271	5167
	3257	4576	3343	5613	4884	7741	2477	5092	4793	5325	4855
	5771	4647	4218	7660	4034	6003	5220	3782	4747	4916	5684
	5628	3466	3770	3410	6664	6427	4752	4604	2787	2581	4032
	4124	2891	7995	3407	5188	4583	4919	4018	4107	5326	7603
	7058	5154	4841	3517	5776	6358	6092	4093	6047	4817	3821
	5188	4516	5597	3763	4305	6271	4033	4354	4418	4804	5568
	8913	5190	5401	4809	4292	5132	4582	5300	5492	4812	4561
	6259	3894	6187	4104	2861	5202	3476	4832	8262	6253	2556
	5590	6961	6327	5547	3463	2985	6437	4195	6277	5848	6208
	5435	2558	4542	6045	5327	3567	5870	3732	3657	5527	3332
	3762	5361	4153	4673	4635	4515	6352	5602	4636	5668	4176
	3065	3485	3067	5166	8831	4469	3084	8387	5095	3995	2369
	7489	6801	3808	5325	4489	5355	7317	4062	6168	4777	4206
	5636	4530	3328	5814	6290	4047	5059	3157	5127	5230	3464
	6808	3886	3912	4455	3979	4828	5185	4576	3843	6926	11038
	4254	11174	2784	5094	6418	6050	4443	5940	3377	4075	6860
	6015	5944	4602	6890	4255	3813	5105	5363	4166	5754	4181
	6621	4800	4836	4607	5787	3474	3540	5311	4788	4685	4760
	3201	6142	4290	5587	5047	4156	6027	7204	4903	4477	6790
	5551	4932	2554	3527	5589	4507	5223	4791	5077	5721	5566
	4581	5802	3641	3648	4986	8382	6163	5579	2727	2971	3821
	5731	4688	5848	3680	6036	5373	4257	4296	5959	4454	6295
	3903	3910	5072	2582	6654	5525	3848	3971	3385	4271	3280
	5530	5450	5281	6036	6954	3556	5317	3884	5843	4740	4966
	3483	4569	3922	3554	5237	4392	3355	6365	3181	4780	6325
	6368	3607	5138	4430	11169	3549	4218	3806	5041	4002	4341
	5394	5389	2762	4479	4403	4086	4347	6594	5328	4826	3095
	7696	6908	4853	3019	4696	3155	3425	4692	5479	2991	4996
	4834	4440	3187	3193	6056	5113	5793	4397	4537	5059	4233
	6117	4022	5004	7070	4073	6229	4823	5097	3064	3856	3319
	3646	4596	4795	4846	6469	4102	4195	6268	4426	6095	6627
	5072	4518	8620	6212	4710	5788	3982	5653	4383	3644	4378
	3197	3146	6455	7692	4602	5553	2686	4078	4345	4568	5046
	10718	4677	4801	4227	8461	3952	6235	4395	4156	4040	3661
	7609	3251	4777	3958	5328	6120	4882	3334	4613	4675	3724
	5637	4649	3707	3053	5414	4994	4604	3834	5891	6468	4231
	4595	4942	5762	5910	4359	5532	3609	5823	4759	5352	3987
	3308	3792	6736	7910	4228	4813	5011	4335	4790	3240	3374
	4724	3991	4630	5464	5451	5199	5544	5170	6806	6955	4026
	3817	5415	2734	5029	4801	5195	5443	2657	5282	2945	8243
	6051	3942	4446	5293	5793	3965	6038	4500	4162	2532	3737
	2607	5392	3332	5799	4380	3088	4295	5087	4909	4458	3054
	6494	3705	4684	5543	3230	4023	6287	5025	6161	3952	5051
	6793	5881	5880	4164	3155	4390	4720	3033	5450	3402	4868
	6457	5527	4755	5606	8782	6286	5275	4225	4782	3146	4393
	9671	4186	4118	5467	5884	4665	5995	4422	3358	4847	2991
	3917	7616	5481	5743	5730	4889	4293	6617	4618	4664	3055
	2552	7634	5268	4756	2818	4024	3472	3328	3928	4105	5263
	7036	3329	4029	5872	4351	5546	3313	5315	5088	7246	4651
	6286	5180	3779	4085	8595	5789	4669	4581	5599	3146	5696
	5762	6468	2869	3969	6337	3057	5662	3987	5760	4492	3857
	6532	6146	5146	3980	4119	3718	5136	5957	3988	5036	5032
	7009	4652	10130	3971	6171	5097	3268	3997	5017	5457	5275
	5924	3542	6377	4194	4226	10928	4138	5633	5107	3720	3445
	4592	6074	5448	5578	5263	4938	5839	5025	4458	2343	4673
	3586	3184	4745	5152	6762	7211	5585	5886	3105	4093	5960
	4558	4134	3643	5337	5236	4436	5130	5032	4679	3471	3913
	8871	4980	4341	5803	4997	4699	4570	5990	3111	4254	3820
	5723	5310	5078	3961	4103	3886	5010	5701	4286	6011	4645
	4897	3833	3764	4971	5679	4086	4102	5257	4255	4982	3486
	5947	4232	4898	5040	9488	3637	5314	4082	3806	3283	4210
	3144	5082	5175	5040	5803	4493	3255	4372	4042	4252	9127
	7080	7075	6703	7503	4424	5520	3024	3946	3494	5182	4139
	6359	5409	7898	4579	5606	5893	4379	4304	4937	7132	3105
	3757	5733	4522	4004	4514	4584	4846	4550	6887	5780	3977
	6649	3695	5096	4175	3762	4297	5290	3477	2713	4416	4483
	5346	5668	7345	3931	5785	4626	4687	4396	5697	4698	5289
	5142	4051	6143	3374	3354	4850	5032	3190	5535	3147	5993
	5868	4950	5392	4972	5634	6519	5487	6478	5400	3822	4191
	4637	2822	4241	5329	8142	4434	4004	6172		5943	3016
	3544	5897	3289	6017	3952	4305	5501	3309		4145	3959
	6366	2923	2819	6768	5024	4257	3803	3041		2979	3793
	3523	5033	4402	5285	5724	2898	4643	6596		3100	3317
	3098	5887	5682	7158	5652	5294	3608	5835		4097	3654
	4423	3394	4156	5151	2820	2572	4211	5859		4626	3409
	4638	7948	4743	4208	4785	3589	3901	6017		5270	4900
	3593	9427	6255	4128	2500	4326	7669	3921		4921	5660
	5996	6111	5596	3630	3108	4965	4366	5567		6282	4402
	4165	4460	7080	6138	4982	3406	6459	4207		3365	4863
	5415	6746	4555	4891	3863	4252	5483	3777		3769	4473
	4083	5861	3428	6997	6314	3362	4646	4049		6742	6026
	4523	6120	4475	3391	4510	6180	3760	5548		4718	5976
	5178	6256	4230	2645	6093	5384	4585	6172		5426	4924
	3174	3126	4078	5651	6362	3340	4963	4732		4332	4939
	3016	5139	5374	3833	4254	4927	4062	5597		3172	9240
	4769	2863	3821	3949	7974	4488	3174	5728		4557	3321
	4375	5353	2964	6795	4375	4744	6434	6994		4812	4677
	3876	5833	6900	7436	5436	4635	5528	4353		4072	6671
	5054	3528	7588	5890	5983	8912	3741	3296		2976	3839
	3135	3069	6647	3583	6691	4322	3680	4946		5095	3970
	8246	6012	3314	4202	5604	4726	3032	4083		4524	4778
	8147	4200	3638	5090	4835	4249	4949	2839		5318	5189
	5413	6037	5017	5565	5773	5081	6587	3918		3733	4530
	5107	5840	4617	6768	4703	4384	3963	3439		6038	3903
	3269	7107	5640	4955	3510	4662	3089	5679		5055	5887
	5761	4588	4681	6119	3806	3847	3597	3114		5662	4864
	4655	4296	5731	5833	6254	3821	4357	3159		3945	2989
	3273	3216	3139	5650	9358	5881	3984	4176		5432	3471
	5353	4308	3598	6016	5086	2892	5780	3992		3192	3280
	4670	3745	4891	3896	5006	4772	4968	3326		3807	3569
	5694	3533	6773	2993	5529	3574	5823	5239		4484	4218
	6491	3173	7037	5075	3664	3723	5015	5429		5380	3573
	3614	5268	5001	5415	4933	3071	5925	4379		3257	3054
	3911	4233	5769	5086	4032	3996	3931	6137		3878	4673
	4883	5639	6451	5477	3941	4159	4115	4708		5499	4757
	5512	5273	5662	4132	3962	4520	5848	5209		2994	5603
	2556	4157	3491	3428	5231	3130	4167	4355		3508	3006
	6187	5051	5080	4665	5179	4382	4103	3426		4511	3831
	5160	5200	3990	5015	3881	5997	2507	3716		5183	4906
	4070	7215	6141	4449	5616	4285	5711	6412		5370	5399
	4197	5588	4874	3529	3144	4411	3598	4026		3913	5075
	5192	4183	4877	3346	3814	5157	3369	5053		2588	2471
	6893	4152	4304	5245	6419	4310	6208	6761		5724	4049
	5719	5286	7411	7896	5000	4364	2674	5957		4679	5658
	4419	6916	4465	4246	5718	2482	3242	4513		4397	5669
	3999	4561	3066	3634	7094	5205	3579	5501		4776	4757
	4134	3920	4948	8403	5644	5153	6677	7112		4906	6093
	5118	3838	3185	4830	6337	4319	4759	5072		3520	4075
	5453	4980	5803	10695	4638	5483	3494	2937		3729	6359
	6842	2825	3141	5313	4654	3460	5302	3902		6451	4947
	4815	4585	3338	6294	5901	4927	5766	3514		4058	4110
	3959	3324	4898	4641	5688	3740	7336	2900		3466	5113
	9035	6253	5078	7170	4838	4455		4626		4404	3976
	6027	5361	3789	4340	6352	8525		5155		5310	5899
	4649	5452	3358	3824	6107	4435		3918		4097	5262
	4796	6050	5641	3712	6347	5587		4444		4286	3109
	2835	6157	9348	4219	4851	3302		4461		4143	4134
	4560	3309	4965	4215	5062	4396		5483		3581	3252
	5991	5330	5601	4968	5383	3105		4560		4255	3291
	6501	4613	3305	3739	6549	4185		4900		5027	5275
	7589	4896	5550	3745	4219	4397		3507		4170	7898
	7436	5049	4877	3568	4751	5230				6366	3538
	5472	3714	3491	4242	9307	3983				3362	4782
	3982	6736	4165	3929	5880	5168				3775
	4658	4185	4708	6509	6124	5342				4235
	5244	5688	5182	3858	4817	5636
	2951	4832	3567	5460	3383	4390
	4949	3413	3561	4891	4219	3182
	3459	5641	4826	7228	4907	4471
	4455	6416	6350	4803	4992	6754
	3455	5529	6261	4497	5566	5034
	3010	6650	7093	8939	5637	4922
	5004	5752	4240	3973	2940	4423
	3986	5380	4387	3511	3098	7192
	7161	4235	4278	5532	3869	6257
	3375	6045	4450	9610	4255	5975
	4943	5921	5551	6339	4965	5375
	3965	3339	4236	3931	3715	5725
	4203	6934	3692	4592	6099	3764
	4344	4616	5886	4364	4754	4271
	4801	5776	5245	3733	4161	4382
	6137	5659	5020	3485	2545	3827
	5086	6802	4626	2642	6569	10311
	3293	4976	3622	3706	3245	5760
	7303	5216	5920	3422	9485	6001
		4747	3881	4558	4854	4678
		5118	4453	3949	4756	4269
		4904	4503	4118	7690	3428
		2978	3883	4138	6881	3856
		3360	3931	4586	4609	5436
		5381	4067	4399	4260	6773
		3908	4423	4125	4204	4368
		6654	5213	3585	6666	5879
		2995	6718	4996	4321	4248
		4153	3817	3904	4430	2885
		2990	3977	6015	6320	4048
		5002	4241	2968	5492	4667
		4173	3351	4885	10107	5456
		4462	6036	7651	4963	5607
		3470	7636	5238	5458	4576
		3947	6594	3862	6110	3985
		4667	3923	4473	5187	3873
		6860	5421	4486	3696	5009
			3189		6513	5034
			3400		4440	3832
					4582	4708
					4271	3967
					2917	4775
					5690	4493
					5421	4831
					3774	4866
					5944
					5357
					3344
					5112
					5312
					4668
					3533
					8633
					6159
					5904
					4345
					3757
					3008
					6884
					5252
					4008
					5321
					6404
					3227
