# Supplementary material for: Membrane-mediated dimerization potentiates PIP5K lipid kinase activity
Source: eLife. 2022 Aug 17;11:e73747. doi: 10.7554/eLife.73747 (PMC9470164; doi:10.7554/eLife.73747)
Supplement: Figure 1—source data 6. [file elife-73747-fig1-data6.xlsx]

## Sheet: Figure 1H
Figure 1H
time (sec)	mNG-4KB	mNG-5KB		Fraction of apparent dimers based on the > 8200 single particle intensity
0	0.79954	0.0418118		Calculated from data in Figure 1F-1G
1	0.712377	0.0163934
2	0.561404	0.0162866
3	0.430225	0.0131147
4	0.332649	0.0542169
5	0.250352	0.0351438
6	0.214882	0.00787402
7	0.205841	0.00380228
8	0.176471	0.0199005
9	0.168168	0.00374532
10	0.180867	0.0188679
