# Supplementary material for: Membrane-mediated dimerization potentiates PIP5K lipid kinase activity
Source: eLife. 2022 Aug 17;11:e73747. doi: 10.7554/eLife.73747 (PMC9470164; doi:10.7554/eLife.73747)
Supplement: Figure 1—source data 7. [file elife-73747-fig1-data7.xlsx]

## Sheet: Figure 1I
Figure 1I
							Frequency distributions of mNG-kinases molecular brightness
Single particle intensities of mNG-kinases (raw data)							N =	19954	10634	12079	23304	4063	3911
mNG-5KA	mNG-5KB	mNG-5KC	mNG-z5KA	mNG-yMss4	mNG-4KB		mNG-5KB intensity (bin center)	mNG-5KA	mNG-5KB	mNG-5KC	mNG-z5KA	mNG-yMss4	mNG-4KB
3804	4047	3252	4573	4035	10736		0	0	0	0	0	0	0
3918	3376	3293	5517	3042	11094		400	0	0	0	0	0	0
6157	7823	4723	5904	4248	10104		800	0	0	0	0	0	0
4841	5698	3648	6004	5055	13377		1200	0	0	0	0	0	0
5482	4860	3236	7022	3542	11727		1600	0	0	0	0	0	0
5369	8555	5711	5655	3179	10466		2000	0	0	0	0	0	0
5544	4402	5465	5450	2974	9468		2400	0	0	0	0	0	0
3970	4197	4719	3949	3855	9340		2800	5.01153e-05	0.00047019	0.000579518	0.000128733	0.0246763	0
4351	4013	5767	7002	4170	10920		3200	0.0650997	0.152906	0.164335	0.108522	0.135842	0.00306827
6914	6600	4816	7318	4316	13018		3600	0.127193	0.205285	0.217237	0.196447	0.122893	0.0107389
6276	4706	4378	9317	6275	11723		4000	0.153052	0.181211	0.184866	0.191426	0.131444	0.015597
4415	4377	3953	5356	3201	11794		4400	0.158565	0.150649	0.148771	0.158986	0.124114	0.01483
4514	3719	3504	4372	9100	4297		4800	0.131653	0.112658	0.110357	0.117448	0.113364	0.01483
5260	6853	4073	7431	4461	6894		5200	0.112258	0.076829	0.0678864	0.0794713	0.0845346	0.0140629
4175	3635	3628	5916	6277	4978		5600	0.083492	0.0451382	0.0423876	0.0489616	0.0698754	0.0201994
3839	3969	3789	3825	4971	13170		6000	0.0608399	0.0268008	0.0237602	0.0311964	0.0476423	0.0158527
4658	3529	4438	5325	4107	9727		6400	0.0381377	0.0141997	0.0146535	0.0180227	0.0339604	0.0201994
3614	4918	3756	10815	9855	12192		6800	0.0240553	0.00827534	0.0077821	0.0103845	0.0195456	0.0168755
4219	3671	3710	5378	4573	14261		7200	0.0144833	0.00658266	0.00554682	0.00708033	0.0161251	0.0173869
4375	6365	4328	6383	6148	10128		7600	0.00806856	0.00347941	0.0021525	0.00536389	0.0124603	0.015597
3651	6053	3522	5492	3119	5685		8000	0.00471083	0.00263306	0.00173855	0.00364744	0.00855118	0.0235234
7113	3368	3925	3990	5012	10426		8400	0.00190438	0.00225691	0.0014074	0.00334706	0.00488639	0.0288929
13603	4717	3518	5573	4559	5577		8800	0.0016538	0.00188076	0.000827883	0.00326124	0.00513071	0.034518
4231	3989	3483	6906	4124	5101		9200	0.0016538	0.00169268	0.000745095	0.00261758	0.00317615	0.0462797
3462	3458	4909	5102	4197	7202		9600	0.001303	0.00159865	0.000910671	0.00291795	0.00219888	0.0524163
5364	4891	4380	5239	3821	10886		10000	0.00110254	0.00131653	0.000910671	0.00253175	0.00439775	0.0621324
5671	3875	4926	3505	3383	4436		10400	0.00155357	0.000658266	0.000248365	0.00167353	0.00195456	0.0708259
4946	7015	4612	4425	4571	5103		10800	0.001303	0.00094038	0.000662306	0.00124442	0.00219888	0.0613654
5326	4147	5575	5725	4837	7943		11200	0.001303	0.000846342	0.000745095	0.00124442	0.00171024	0.0605983
4092	3379	3121	6053	4058	11254		11600	0.001303	0.00047019	0.000413942	0.0011586	0.000977278	0.0664792
3595	5959	3582	4759	4972	12142		12000	0.00125288	0.000282114	0.000248365	0.000986955	0.00146592	0.0623881
8056	7322	3911	4578	5879	6334		12400	0.00085196	0.000376152	0.000331153	0.0007724	0.00146592	0.0478139
5036	4640	3973	6201	6284	10808		12800	0.000551268	0.000376152	0.000331153	0.000514933	0.00195456	0.041933
6682	4446	4519	7583	4367	4919		13200	0.000501153	9.4038e-05	8.27883e-05	0.000300378	0.000732959	0.0391204
6451	7836	5205	3912	2985	9807		13600	0.000551268	0	0	0.000128733	0.000488639	0.0283815
4659	4981	5527	5086	4382	4203		14000	0.000501153	0	0	0.000128733	0.000488639	0.0268474
5497	5328	4020	4687	6489	10927		14400	0.000400922	0	0	8.58222e-05	0.00024432	0.0181539
6768	3660	6089	5881	5587	13366		14800	0.000150346	0	0	0	0.000732959	0.0130401
4861	3385	4083	3669	4950	11547		15200	5.01153e-05	0	0	0	0.0012216	0.00792636
3770	3755	4679	4445	3624	8683		15600	0.000200461	9.4038e-05	8.27883e-05	0	0.000488639	0.00588085
8801	5142	3838	6228	3343	4029		16000	0.000100231	0	0	0	0.000488639	0.00536947
5703	5437	4421	3513	5967	10535		16400	0	0	0	0	0.000977278	0.00281258
14334	5046	4913	4932	2729	11670		16800	5.01153e-05	0	0	0	0.0012216	0.00204551
3562	4462	4510	4141	4393	9359		17200	5.01153e-05	0	0	0	0.00024432	0.00153413
5796	4125	4911	4988	4798	13521		17600	0	0	0	0	0	0.00255689
4959	4387	3722	5391	7647	10756		18000	5.01153e-05	0	0	0	0.000488639	0.00255689
5636	4107	3113	5687	3501	10788		18400	0	0	0	0	0.000732959	0.000255689
6216	3592	3730	5251	3529	13319		18800	0	0	0	0	0.00024432	0.000767067
3647	3307	3355	8440	4251	12087		19200	0	0	0	0	0	0.000255689
3592	3904	5329	4577	3540	11415		19600	0	0	0	0	0.00024432	0.000511378
9254	3800	3820	4089	6572	13120		20000	0	0	0	0	0	0.000255689
5198	3921	5456	3502	5621	9673		20400	0	0	0	0	0.00024432	0
4420	3427	3571	4178	3674	12740		20800	0	0	0	0	0.00024432	0
4873	4919	3697	5988	3587	9498		21200	0	0	0	0	0.00024432	0.000511378
6128	4084	3100	3985	3450	8026		21600	0	0	0	0	0.00024432	0.000255689
4842	4342	4047	5700	4677	10796		22000	0	0	0	0	0.00024432	0
3938	4973	4923	4575	3989	13945		22400	0	0	0	0	0	0.000255689
4245	5232	4812	3947	5789	13392		22800	0	0	0	0	0.000732959	0
4575	6133	3989	5455	5806	8149		23200	0	0	0	0	0	0
6031	3723	3780	3804	3898	5267		23600	0	0	0	0	0.00024432	0.000767067
4729	4718	3183	4573	4876	10355		24000	0	0	0	0	0.000732959	0
4380	4779	4513	5070	4351	11413		24400	0	0	0	0	0	0.000255689
3663	3629	3864	4582	3911	14449		24800	0	0	0	0	0	0
6474	4718	5523	4536	4007	3436		25200	0	0	0	0	0.000488639	0
4424	7011	3640	8031	3144	11582		25600	0	0	0	0	0.00024432	0.000255689
4377	3342	5267	8536	4904	10666		26000	0	0	0	0	0.00024432	0
5242	6816	4758	6641	3346	12549		26400	0	0	0	0	0.00024432	0.000255689
13924	5628	3595	6084	4120	11778		26800	0	0	0	0	0.000488639	0
5527	5599	4312	5872	5849	13573		27200	0	0	0	0	0	0.000255689
6565	4612	4237	6059	4284	18907		27600	0	0	0	0	0	0.000255689
4599	4539	3461	5046	3272	9266		28000	0	0	0	0	0	0
6126	5483	5696	3883	3618	8724		28400	0	0	0	0	0.000977278	0
4591	3812	5063	6598	3477	12376		28800	0	0	0	0	0	0
5997	3740	3794	4383	6079	12572		29200	0	0	0	0	0	0
3533	4385	3817	10925	4722	14995		29600	0	0	0	0	0.00024432	0
8794	3825	3801	5144	4989	11864		30000	0	0	0	0	0.00024432	0
5826	3604	3952	4987	4702	5866		30400	0	0	0	0	0.000488639	0
3975	5223	3744	4724	4598	14548		30800	0	0	0	0	0	0
4207	5019	3260	4575	3627	10114		31200	0	0	0	0	0.000488639	0.000255689
5922	4935	3068	4545	3316	10315		31600	0	0	0	0	0	0
8731	3922	3252	8966	3084	6608		32000	0	0	0	0	0.00024432	0
5184	4343	4439	4857	5863	13253		32400	0	0	0	0	0.00024432	0
14342	4957	3495	5038	4192	8624		32800	0	0	0	0	0	0
4448	6095	4140	4068	3799	12338		33200	0	0	0	0	0.00024432	0
4889	3584	4338	4386	4581	12172		33600	0	0	0	0	0	0
4862	4200	3102	5012	3884	6256		34000	0	0	0	0	0	0
7566	5019	3423	7068	6415	14097		34400	0	0	0	0	0.00024432	0
6102	3585	3700	4898	6032	9084		34800	0	0	0	0	0.000488639	0
7023	6023	4843	3608	3750	6283		35200	0	0	0	0	0	0
3950	4817	4503	3715	3214	7041		35600	0	0	0	0	0.00024432	0
7265	4743	4729	4428	7144	6042		36000	0	0	0	0	0.00024432	0
3881	5862	4455	3712	4915	3704		36400	0	0	0	0	0.00024432	0
3657	3398	5834	7991	10324	3849		36800	0	0	0	0	0.000488639	0
4954	3490	4797	5092	5148	10732		37200	0	0	0	0	0	0
4529	5649	3638	6552	4089	5590		37600	0	0	0	0	0	0
4506	5342	3296	4228	3673	6988		38000	0	0	0	0	0	0
5360	3169	5909	5665	4784	12195		38400	0	0	0	0	0.00024432	0
4210	3718	4034	4550	4456	5923		38800	0	0	0	0	0.00024432	0
4476	4351	5473	4489	4073	5651		39200	0	0	0	0	0	0
4185	3479	3386	11126	3453	11969		39600	0	0	0	0	0.00024432	0
5058	4308	4935	5809	3975	10781		40000	0	0	0	0	0.000488639	0
4475	3896	3285	3759	3796	9819		40400	0	0	0	0	0	0
5522	4071	3741	3368	35787	14139		40800	0	0	0	0	0	0
4041	4931	3882	5850	3003	13217		41200	0	0	0	0	0	0
4157	5572	4799	4922	3261	10912		41600	0	0	0	0	0.00024432	0
4631	3310	4274	4366	5656	9908		42000	0	0	0	0	0	0
5476	5044	3076	4148	4786	8987		42400	0	0	0	0	0	0
4349	3673	4158	4375	5663	13879		42800	0	0	0	0	0.00024432	0
7071	4339	4947	3488	4920	10287		43200	0	0	0	0	0	0
9263	3195	4733	3755	4225	10066		43600	0	0	0	0	0.00024432	0
17362	3677	4375	3599	3180	9616		44000	0	0	0	0	0	0
5639	6894	3349	4159	7039	7222		44400	0	0	0	0	0	0
4535	3834	3554	4959	10034	11346		44800	0	0	0	0	0	0
3617	5659	4248	4812	5236	10338		45200	0	0	0	0	0	0
5357	5060	4510	6131	5156	11716		45600	0	0	0	0	0.000488639	0
4403	4442	3527	12664	3320	10701		46000	0	0	0	0	0	0
5629	3549	4762	4825	3165	10290		46400	0	0	0	0	0.0012216	0
4265	4978	4577	6734	5038	12706		46800	0	0	0	0	0.000977278	0
4652	3853	4722	4088	5792	15571
6180	4508	3402	5908	3791	10483
8287	3455	6374	3977	4937	4815
6277	3790	3294	7220	4351	13212
4498	3498	4601	4282	4420	6262
4660	3442	3613	5953	3053	13087
6368	3121	4600	10936	3798	5252
4675	3297	4641	5021	4312	10645
4832	5569	4030	3713	3878	3771
10332	4873	3355	3307	5285	9109
4727	4075	3920	4723	4217	10563
3676	5838	5880	4665	5168	13987
6054	5501	4072	4415	4270	4783
5628	4327	4718	3932	5631	9966
4406	7015	4672	6882	3148	11420
4622	4837	3663	5681	8824	11562
4446	4920	4008	7007	3768	10829
4560	3554	3216	6580	4878	21330
4135	3452	4149	4109	4480	11554
4359	3827	3900	6209	4898	5901
4515	4595	5072	3511	3063	11598
4592	4890	4166	4398	4478	7340
3664	4166	3384	4237	3680	11271
4040	4160	3266	6232	3876	10744
4205	4457	5085	3646	3275	12354
3545	3887	4383	4331	3092	6238
5508	3497	4533	3691	3085	13088
3431	3516	3655	4463	3221	10112
3743	3482	5345	8660	2747	11799
6267	5658	3497	3380	2893	10499
4883	5744	6963	3542	3878	8640
6056	3676	6875	4192	15220	7153
5609	3871	4073	9418	3840	6264
3891	3324	3455	5067	4186	4349
5801	4268	3753	3288	3290	5979
4791	3897	3954	5322	3647	6925
14241	4180	3713	4713	3834	11424
6094	3463	3417	3905	3386	5964
4491	3546	4168	3413	2708	10306
4779	5858	3556	5657	2872	11626
3683	5190	3283	5602	2796	9493
4340	3314	4127	3575	3329	3459
3546	3988	3760	4460	4360	11465
5914	3589	5485	4193	3142	11142
6062	3265	5057	6400	5586	11851
4166	4064	3191	12827	3124	12311
6646	3909	4031	4841	6239	10244
5333	4910	3891	5628	5540	9307
5840	4291	4421	3336	4002	7367
4988	3335	5525	4813	3054	8060
5632	3454	3974	4222	3024	10248
6612	4474	4295	3876	3681	8430
5599	3634	3760	7327	4500	10539
10157	6496	5648	3637	6690	3677
5331	4330	3137	4006	5213	6340
6844	4917	3207	4833	4721	4054
5591	4544	4190	12660	5241	4187
6254	4185	3274	6441	4523	13900
6579	4924	3597	5438	3256	10741
6155	4176	3232	4450	31126	15334
5142	3776	5438	5104	3334	11581
3854	4198	3365	4960	3907	10667
3733	4724	3192	3560	5421	10836
5129	5332	5453	4970	4866	11445
5991	4562	4032	3849	3227	11390
4655	5836	3315	4807	5270	15573
4931	4137	3884	5805	5644	12997
3937	5809	3987	4151	28281	7002
4928	5081	3506	5139	4460	13559
3463	3884	4559	5860	6315	10483
4672	4826	4168	4696	3242	11331
5907	3437	3673	5282	4252	13443
5263	5552	3327	4579	5060	14530
6260	3978	4871	3753	4462	11203
5414	4215	4046	4005	4832	5724
4185	4796	4812	4182	28529	9187
5172	5003	4695	4732	4909	15943
15492	4486	6526	4465	5884	3851
5723	3323	4139	4689	5436	12819
4967	3681	5956	11391	3368	7577
4264	3569	4576	3525	4502	9656
5699	4027	3984	3994	3132	5678
5477	3635	5011	10804	4973	10725
5220	3219	4442	3870	3053	5111
4999	4736	5779	5675	4276	16149
6193	3925	6397	3472	4809	11981
5616	5693	4906	4152	4753	13207
7295	3628	3506	3312	3789	3537
5028	4519	3356	3301	4849	10519
5018	3486	3572	3560	5545	6519
4145	3264	4393	4914	3920	13471
6118	3918	3287	5396	3299	13076
8389	3884	3699	4086	4218	14659
5740	5261	3646	6190	4419	10835
13626	4162	3096	4032	4020	9563
5228	3804	3789	4911	3607	9892
5709	5961	3908	4508	3936	13175
6301	3955	3427	4721	3546	12502
4303	4183	3459	3891	3312	9327
4531	5283	3238	4962	3342	6129
4146	3988	4110	5055	3058	6456
4394	4741	3855	4933	2973	9090
5866	3417	4446	11303	4511	4539
5246	6099	4853	5521	4539	8546
3728	4160	3964	3848	4701	11598
4122	3884	6478	4655	3071	14843
5712	5374	4009	4900	2892	11150
4106	3581	5190	5094	3044	11156
4634	4685	4499	3643	6026	4881
6246	6650	3295	6454	5697	11128
5254	3734	4120	6257	3262	14787
13689	4486	3867	5112	7580	11907
4700	4160	4053	4403	3678	12016
3359	3593	3479	6776	3204	10502
3867	4304	3109	4727	3179	31117
4569	6133	3279	5043	2931	10170
4081	3455	3857	3671	3965	5966
6833	4446	3533	6433	4130	9276
6182	3144	3937	3860	4862	10245
5492	4220	4386	4489	4828	9913
3681	5354	5802	4180	3432	12964
6045	3853	4695	6709	6504	10871
5043	4921	3349	5254	5932	11941
4426	3484	3840	4069	3628	6293
6546	3473	3602	11855	6066	10465
6731	4828	6161	4328	8663	12310
13745	4956	3479	5208	4771	10564
5239	4365	4878	7329	3152	9809
4093	4564	5751	3393	3442	7122
6807	5214	3968	3439	4519	6612
4034	3236	4008	3558	4704	11532
4555	5070	4473	4899	5434	6129
5483	4098	3747	3395	4793	12629
4421	3406	4033	4169	3637	13250
4586	3449	3386	3815	4412	12004
3475	3668	4760	3513	3506	5944
4420	3881	4804	4953	5173	11159
4680	5008	3330	3726	4272	11000
3950	4286	4338	5155	4101	11664
3808	3795	3972	3643	3694	13332
4410	4198	3814	3901	3994	8529
3741	3498	4889	4736	3636	4028
5160	3499	4324	3933	4730	10448
5329	3322	3963	4479	4599	9428
6746	5028	4987	5490	3698	6835
6353	4991	5079	4201	3655	7172
6862	3828	3908	3548	3223	11647
4059	3269	4251	5816	4313	9976
3329	5556	3196	5996	5231	8052
3705	5079	3567	4996	5943	13902
4742	5601	3834	4002	4645	11468
4151	3533	6535	4315	3329	14129
4945	3762	3526	4880	2769	11750
8605	3686	4112	5844	4395	15870
4975	3278	4054	3557	2886	4684
4349	3954	4609	4609	4682	9943
4570	3408	5335	4953	3900	6082
5913	5412	3401	4375	2948	10865
4585	3914	3434	4743	2809	13734
3489	5397	3610	6145	2830	6259
4710	4161	4960	6700	3642	12273
4942	3829	3960	4456	3435	11536
10909	3990	3520	3782	5471	10625
4528	4681	3099	4101	4786	7863
4579	3570	3587	3440	3647	9258
4260	5188	4251	3661	4126	6877
7553	3449	3064	3450	2727	11530
3660	3610	3224	4118	4248	9498
4444	3724	3599	5174	3836	10594
4171	4192	3681	4850	4056	11388
3594	3695	4066	6264	6195	9250
4276	5096	4493	3746	4390	10531
3770	3230	6129	6019	3329	8342
3978	3833	3180	4829	3048	4421
4211	3909	3470	4786	4140	6427
7160	4468	5398	9900	6054	8532
4085	3761	5202	4197	4907	10576
4803	3595	3598	3323	6340	13634
4865	6748	4205	4019	3288	12678
7373	7717	3615	3650	3729	10851
4796	4496	4878	3362	3633	9492
4104	3566	3702	4063	4461	9877
4504	4697	4415	4627	3630	7158
5744	3312	4034	3314	5863	10227
10096	4439	3487	5276	3082	4947
5136	4340	4051	3810	4857	6648
6654	4437	4540	3599	3951	10370
6145	3772	4017	4476	10312	8081
4205	3851	5491	4651	4628	10009
4286	3285	4127	6262	3947	11354
5015	6420	4270	4367	5643	11600
6280	3461	3082	4780	3178	9483
6548	4068	4649	5430	3644	11792
6158	3322	3229	4019	4044	10093
10550	4961	4186	4471	19517	8099
4318	3709	3157	4524	6967	11160
3833	4441	4962	4667	3941	11944
5336	5536	4748	4786	3262	11504
3594	4042	4999	4738	6603	14612
3488	4130	3937	4187	4105	11949
4177	3397	6603	6394	4354	11456
4590	4022	3728	4001	3239	12262
3844	3632	3742	3601	6462	13316
3438	3582	4215	3905	6166	11023
5289	3900	5749	4170	5694	13830
4080	3819	4692	4692	5088	16345
3859	3602	4275	4799	4845	6795
5595	3849	5473	12282	5588	12073
3974	4769	3349	4325	5033	13094
3957	3852	3563	4222	5904	13954
4043	3467	4515	5783	3629	10023
5867	3802	4449	4598	4986	10196
7287	3294	3816	3978	6595	11693
4374	4830	3392	3998	5946	4302
3321	3998	4438	5134	5665	8317
7133	3629	4396	3636	21938	6536
4227	4181	3766	3781	5151	10207
11862	3585	4695	6249	3986	10507
6252	3567	3493	3336	3676	13896
6579	5212	4146	4114	3226	9799
5810	5660	4174	8808	3796	11047
3893	3590	5846	3527	4240	11267
4039	6888	4643	6060	3329	12288
6371	3555	3525	3370	3620	7832
6267	3529	6381	3354	6457	9237
4279	3269	4322	4555	7279	11843
12766	4083	3361	3787	29714	12394
4738	3411	3333	5679	7186	5714
4425	4663	5529	3387	4638	12430
5120	4895	3858	3919	7146	8131
4524	4099	3363	3785	7645	6928
3904	4371	3356	4871	5041	10055
4168	5069	3852	3795	5237	13528
4342	3928	4812	3257	5615	8299
4111	4036	4057	5108	3481	7024
4307	3732	6787	4880	4568	14270
3641	4917	6092	3982	8170	3408
5718	4609	3406	4045	9609	11319
3518	4994	4681	6102	3115	13073
4032	5170	3032	6082	3221	7135
4146	5626	4675	4320	8759	11413
4798	3741	3928	5310	5851	11920
3730	3622	4535	4260	3347	13855
3330	4039	4975	5109	38373	10292
5170	3467	3461	4044	3097	5977
3360	3748	4848	3578	3874	11529
3750	4919	3188	6767	4069	11075
3651	4856	4600	6261	4088	13528
5130	4242	6134	5001	3953	13137
5565	4429	3453	4818	3496	11267
12000	5440	6465	4941	3729	5186
8250	3279	4679	4730	3967	14108
8774	4883	3476	4125	4776	4893
3964	3451	3344	4259	4909	5628
4044	3171	3836	4777	20428	12861
4640	3567	5410	5218	5424	13622
4897	7109	3616	12927	4797	14063
4148	3888	4375	3555	4066	7783
5346	4176	3203	4018	5493	10570
7594	5336	3068	4805	3446	7335
5382	5272	4019	4003	5905	9771
3424	3417	4273	3586	6143	10239
4567	3400	4035	4150	3817	8573
6923	7409	4133	4250	4106	10493
3733	3702	3345	4606	7206	3449
3557	4383	3290	4431	6186	13841
4004	5178	3218	4219	3502	4087
4009	6912	4031	3302	18549	12874
3380	4067	3970	4165	4524	5692
5058	3453	4332	7153	3152	7989
3377	7915	4212	3524	6303	10525
4271	3653	3399	11684	4177	12241
17996	4648	4388	3443	3865	11812
4852	4081	4042	3781	3362	9276
4156	4107	4600	4163	4816	6511
6484	3352	4171	3416	4643	13556
3864	3938	3994	4284	4353	12636
9900	4772	8761	3557	3615	9031
8540	3595	3548	5247	4840	10118
6109	3141	4645	5838	36209	8262
4854	4072	4442	3484	6052	7497
4412	3975	3993	5184	4922	3898
5406	3946	3620	4488	5096	8440
4938	5177	4289	3580	4292	10441
4113	3514	4113	3222	12635	4407
5623	5222	3470	4610	6350	10141
7884	3545	4010	6067	3276	10990
3418	4149	3756	4080	4897	9714
4884	4532	3483	4426	5369	12324
4477	3698	3470	3553	4782	9457
4783	3817	3395	5047	3566	6844
3210	4805	3571	3763	3777	11283
4334	4531	4814	4575	5980	3492
6384	5700	3757	4411	3534	10742
3720	3575	4016	6112	6018	12035
4676	5447	3733	4572	5161	6248
3562	4257	3606	3889	4504	11140
5856	5324	3610	3993	46809	9985
4076	4064	3247	7573	4171	16572
15189	4997	3772	4361	9018	7091
4454	3204	3527	4797	4359	5612
5349	5471	4479	4276	3906	16406
4315	3113	3381	5468	3268	11654
3539	5134	5170	5479	4970	10854
11458	3481	3990	4165	4641	12280
6220	4174	3961	4913	7168	10849
9490	3508	3396	9412	3326	12338
3965	3982	4083	4339	4827	7938
7053	4441	5493	5951	3600	3512
5685	4022	4647	5018	3600	11442
5640	3765	4495	5478	4095	9798
3670	5037	4514	5832	5424	10454
12028	3444	3692	5293	6078	10329
5660	4401	6134	5012	6228	10693
3258	3269	3280	5900	4503	10875
4220	4094	4880	3342	4745	5941
4044	3582	3287	5015	3479	9558
3932	3274	3471	3921	3110	11357
5265	4252	3391	5934	5989	9866
5094	4138	3335	9174	7900	14258
6174	5922	4892	4763	3416	12412
4516	4836	3877	3584	4265	11162
4501	6436	3432	4736	5214	11965
3504	4013	4129	3235	3365	13509
4218	4296	6432	3807	6733	10257
7152	4122	3807	5670	5710	8404
5712	4438	5670	4295	6432	10051
15402	3670	4116	4206	4533	10678
5095	4534	4417	3569	3038	10838
6179	3502	4924	4110	16127	9774
4307	5971	4954	4091	5099	12962
4844	5442	3567	4361	4007	10183
4906	5709	6669	3601	3424	12680
4763	3819	4252	3343	4246	10180
10223	3923	3555	4621	3081	4284
6893	4483	4328	4419	5689	12082
5495	3541	3304	4473	5761	14327
4643	5420	5143	4243	3782	11300
5430	3601	3906	7178	3888	13443
4824	4883	3715	5972	4590	8888
4874	5080	6381	3428	5859	9780
4817	3893	5004	6769	3299	9829
12171	3438	3392	3883	2844	9633
6154	3991	3999	5584	6613	12704
5166	3569	3107	3893	3537	8388
5755	3520	3470	4044	4534	12114
4017	7111	3830	7522	3925	9696
3999	3235	6335	4301	5759	5121
4006	4415	3565	3499	3132	9323
5668	4380	4958	9471	3543	5501
3605	5316	3545	3643	4979	6222
4972	3994	4681	6299	3580	13322
3145	4026	4546	10597	3086	8648
4249	4631	6557	4064	26504	7699
5538	3342	3779	3965	6090	9866
3326	3310	3539	5163	4775	11536
4027	4770	3522	4490	5080	11161
3916	4192	6377	3786	4676	7692
5419	5104	4474	4556	5147	10360
3364	4018	4143	5630	6399	12274
4180	4858	5343	4828	3135	9875
4487	4853	5373	3780	10943	13025
4855	3391	5414	3976	3707	12397
6557	5124	5316	4237	3739	10218
10967	5061	3580	7736	3166	4805
4489	5304	4163	5108	3617	9550
5020	4042	3807	11579	7924	8577
4839	3437	4183	4118	4972	10879
10358	4451	3973	4167	4237	14112
5599	5319	5008	3813	4562	8278
3972	4308	3893	4465	3753	11741
7581	3265	4906	4080	7266	10542
6060	3585	3779	3409	5604	10819
6344	3753	3136	4000	3168	11861
6602	4131	4987	4374	3690	11469
14094	4376	3346	5043	4361	8934
4105	6447	4153	4718	4206	5554
5569	7007	3618	5636	3376	8474
6626	3810	3848	4713	4021	9440
3865	4413	3263	5374	3484	4735
3686	3736	3939	4895	3198	13518
3363	4874	7055	4066	3714	12092
5557	3966	4328	4632	5539	11269
3819	3609	4662	3665	5680	12381
4065	5572	3912	4847	4932	11826
5325	3988	4637	5773	5374	4177
3851	4347	4057	4792	10426	14000
5355	4125	3483	7397	4036	13000
3839	5048	3775	3625	3463	4174
4570	4919	5734	10150	3050	12443
3423	4710	3399	4071	3797	6620
5901	3360	5106	4363	4777	5639
16186	4599	3419	4864	3332	9220
8400	3977	4497	4495	3495	10489
4288	4178	3613	6553	2956	12242
4583	3461	3396	3761	5474	4698
3989	4264	4024	3670	4800	5128
10417	4343	4222	13437	5791	10866
8115	3895	4206	5067	4600	4228
5357	4843	4293	4178	5512	12435
5520	3840	4676	5142	5713	13029
5910	3379	4723	4600	4116	12395
5444	4347	3392	5543	3637	10376
5127	3880	3867	3811	5702	7813
13329	4434	3491	4681	9866	10949
4802	7272	4141	3430	4871	9046
4684	4365	4400	5377	3116	6462
4063	5595	4514	4024	4945	9421
6017	3541	3969	5206	3911	13238
4799	4690	5933	4987	4522	8893
3967	3890	4520	3441	4169	14577
4575	4643	3778	3886	4200	9781
4465	5160	4048	11325	16525	11618
6118	3842	4527	3550	6322	9222
4827	4232	5879	4140	5464	11833
4329	3924	4784	4042	7277	11480
5689	3935	6117	4304	7020	9491
5082	3516	3959	3671	6277	13856
13327	7203	3617	3951	5464	12632
4157	3189	6091	3223	5287	8251
3927	3786	3996	5991	34701	9350
11041	4722	6070	3880	6774	6820
7216	5392	3723	4889	12780	11077
9771	5206	3839	4077	6140	7370
4440	3681	3439	4005	4986	7028
4914	3706	3092	4417	4030	10701
5883	4495	3962	4053	3145	6062
9502	3620	5407	4552	4322	8313
4959	5256	3264	4241	4038	11925
4296	4760	4457	5289	3965	8518
5726	7739	4973	3890	6648	10753
4658	5447	3071	5567	7506	10998
4470	5487	3302	4639	9694	12917
5150	4401	3671	9491	3077	11859
3632	3297	5147	5142	4897	6263
5811	4024	3910	6250	5358	11283
7323	4238	4112	4924	4664	11352
4057	4109	3974	4074	12122	12678
3665	4019	4034	5879	4595	11066
4317	3904	3418	5092	5848	4913
4075	5716	5901	4615	4074	13353
4535	5030	3957	4167	4465	11387
5178	3768	3629	5241	5286	12515
4432	3501	4814	11537	3855	3440
14857	7550	3739	4110	4230	10866
5566	6451	3608	3997	5834	5460
4535	4623	4129	4349	3316	12785
12479	4098	3438	4857	4854	10722
6070	4807	4095	4538	5233	13607
7599	4419	3615	3880	6907	9683
6099	3685	4236	4763	4047	9387
3501	6470	3406	4955	4071	15309
5295	3452	4562	4295	4515	9311
10486	4489	4672	4526	4993	10544
4965	5963	4811	3774	5588	20133
5398	5710	4000	5246	3184	12902
4283	4146	3855	3640	3753	18338
3615	3246	3119	4853	2773	12845
4428	4755	3201	4055	5328	13499
5048	5735	3336	4146	4446	9837
4218	5234	3481	3325	4324	14465
4359	3514	3125	7999	3350	11179
7147	3734	4066	5978	4697	11297
3952	3384	4486	4475	4647	11969
4536	5314	3625	4148	3996	11918
3707	5064	3727	4854	2970	11372
3680	5219	3974	5783	3082	9641
4014	4595	4298	4371	6326	11954
6484	9506	4475	3712	6322	8584
6016	4398	4143	8998	3733	13112
11353	3627	4648	3849	9753	10047
4323	7180	4201	5435	4124	3401
4424	3208	4835	4412	4947	10541
6719	4679	6094	3844	7106	6212
10234	4708	3499	3367	3796	6116
6240	3696	4258	3638	5239	8981
4936	5226	4606	5879	5316	8601
4030	4642	3409	4444	3277	9234
9739	4798	3940	5077	3234	13716
6931	3561	5070	4187	7155	5940
4146	5225	3531	4493	3266	10760
5325	3670	3601	6515	3362	12599
5264	5166	3748	8785	3923	9581
4397	3435	3119	6283	9595	11113
3387	3149	3532	3923	6411	4908
4910	3321	4769	4259	3531	7900
4092	4642	3459	5467	6997	8832
4153	3256	4220	4966	5031	11174
3629	7037	3984	5321	5910	11005
4401	4194	3203	3915	3815	10152
3991	4021	3720	4273	41485	10462
3975	5270	6798	10650	4620	12776
4456	7197	4730	5921	3028	11214
5071	3279	4262	4776	3761	10166
4323	4340	4265	4312	3429	9457
5380	6604	3840	3682	3385	11149
16809	4732	3705	4066	3099	9203
5376	7486	5492	3156	4122	10512
5113	5000	3151	5375	5692	9175
3442	4972	3505	4950	5627	7312
3608	4863	6549	4965	2974	7393
6495	4946	3229	3689	3446	10197
12047	3382	3136	3893	5326	9949
5765	8243	5477	5354	3655	10154
5584	4305	3559	3488	6002	7073
5598	3285	3544	4027	4723	8596
3415	5231	5025	12464	5230	12655
6624	5763	4159	4665	5657	6308
5263	3482	3109	3626	10081	12328
3708	5629	6464	4500	4066	9641
3584	3216	3178	3853	3582	11865
5020	5852	5028	5181	3156	16559
3807	3167	4886	3609	3503	13379
5075	5388	4931	3484	8733	13730
3857	6931	3579	4233	4613	10558
4131	9945	3677	7146	3037	7486
3740	4197	5198	4690	3819	10838
4573	5754	4235	4693	4288	12431
3723	3567	4125	3616	4021	4139
3943	4836	5588	4223	6636	8780
3340	3289	4404	4911	3181	11126
4895	5454	4288	5106	3469	11465
3575	5218	4841	6309	4409	9520
3451	5595	3146	4105	3813	9366
4300	5383	4368	4322	5395	13350
12796	4855	3058	3892	3408	12090
4806	7233	4794	5452	8968	11345
6754	4389	3428	4027	3122	4423
3506	4587	4150	6613	5490	8982
4241	3401	5170	4986	3923	12865
10397	8309	4010	5918	3774	9779
7317	3847	3701	4282	6144	11769
5179	4036	3017	5319	4348	11901
6460	3827	4562	5902	5086	5664
3804	4063	4451	3809	14850	12922
8539	4684	3230	4570	4537	12575
5768	5562	3383	6819	5032	9465
4316	4529	4798	4092	4319	11055
5294	6147	3792	4796	8740	8911
4142	3754	4588	3402	23984	3693
5145	4604	3795	3401	4240	12834
4991	3797	4705	3942	4837	11981
4108	3876	6379	4116	3508	12932
4859	7395	3146	4607	2816	4540
4368	4643	3928	5221	4466	9578
5569	3861	5789	3997	7413	8523
4736	4451	5826	3668	3479	3621
5188	4971	4521	4522	5808	9113
3968	5137	3523	3577	5030	11232
4130	8522	4462	4294	3116	9904
4093	5104	3788	3645	4037	10212
7263	3635	3505	5702	5886	4926
3496	3540	3187	4153	4682	27777
3350	5491	3886	4034	5274	8223
12574	5162	3756	5706	6052	11110
5574	4404	4256	3655	4229	9943
4894	4300	4572	4263	3923	11269
4633	3763	4155	3398	9258	10587
4688	3503	3119	5037	4395	3841
13394	4278	3758	10519	5463	11195
8022	4573	4027	4891	5426	7622
5475	5043	3409	3476	11678	11101
4301	4535	3309	5069	4771	10570
5686	4236	4021	3880	6279	4718
6865	6774	3783	4134	5783	9490
3521	8056	3940	9119	13359	6095
4356	6420	4500	4367	3512	8786
4400	3655	3159	5284	4359	6615
4686	3175	4428	3304	4799	3665
5301	5147	3997	4030	3352	8419
6057	5152	5154	3615	5060	6410
3945	3438	4491	5344	3929	9152
3625	4907	3974	5201	5270	8963
4667	3918	4626	4708	4113	7150
6419	3862	3122	6200	3082	11922
4071	3651	6408	6323	3438	12738
5918	4488	3922	8081	5118	13363
3542	4176	4588	5119	4338	10171
4138	4701	4639	4732	5754	9070
7459	8690	5904	5588	3365	9581
3530	7072	4022	6479	4212	10980
5826	5419	4416	6707	12967	6720
4503	3700	3339	5699	4037	6995
13426	3768	4841	5399	4496	5322
5507	5681	3843	4085	18096	5676
5503	3654	3264	5337	4151	9936
4353	3757	4575	11217	5043	13492
4393	3409	4051	5111	4009	5283
4672	3917	4490	7224	4468	10780
10654	3375	5758	4347	7587	12215
5409	5120	3059	4159	7214	12723
4807	5466	4506	3082	6596	12569
3521	3202	5145	5129	4154	12475
5014	4564	4160	4767	5022	8454
6398	6490	4318	6589	3360	8574
4135	3444	5525	3579	5724	22392
3763	3731	3330	4576	4123	12954
5524	3401	5501	4572	4641	12237
7607	9341	4478	4589	6011	11956
6015	5629	3156	5068	2874	11760
5422	3222	3602	5245	4788	12320
4129	4959	4738	6008	3837	13121
5897	3494	5838	4440	3275	5030
5337	3988	4084	6767	3764	5086
6518	3467	4890	3293	46602	12263
6721	5204	4959	11577	4184	10677
5024	4052	3299	4686	4892	9605
3921	5296	4179	4055	3915	8018
8405	3942	3319	4609	6224	11681
4594	5684	4788	3704	6686	12719
5932	4924	4028	9647	3927	9796
3920	4704	3634	3747	3237	14446
4600	4115	4278	4714	4012	11066
9225	3894	3350	4756	6434	11599
5319	9686	4230	4778	3778	12063
6186	3759	3590	3583	4343	10475
6146	6752	3671	5110	3255	12261
4056	3827	3999	3496	5480	14107
9671	5431	6190	3693	4250	11809
4501	4713	4534	7654	2995	9061
4592	4945	3597	5135	4844	11420
3828	3651	5705	6826	3297	11092
5982	7210	5271	4754	8494	11673
6980	4664	4349	4551	4880	9700
6105	3636	6175	4481	3953	8440
4954	4785	5381	4719	2845	10104
6412	4189	3862	3632	4270	14913
5769	3511	4781	4669	4066	11286
4635	3252	6525	5114	3108	13751
5562	3309	3913	4403	2964	12918
5439	3306	3755	3974	2952	8451
4972	10112	5104	4342	3636	10735
4093	3293	3171	5407	4036	9071
5860	6453	3239	4720	4560	11103
4309	3727	4024	10703	5363	12349
5449	4078	3391	4944	4543	8607
8536	4747	3231	4031	7009	10867
5012	3859	3621	4011	6356	10670
6112	4694	3242	3889	5075	9039
5142	5153	3119	3378	5412	9834
4059	4745	7304	4642	4373	12111
9697	3768	6271	5665	4861	13973
5317	3942	3985	4166	4437	10447
4180	4166	5171	4048	4192	9126
3841	4725	3555	4295	3724	11856
5915	3269	3439	4836	4163	12992
10568	3351	3708	4212	7877	14852
7685	3456	3528	4252	3055	5041
4020	9715	3920	4199	5594	15139
3514	4415	4203	3998	4980	11937
4747	6953	3886	5219	5095	5711
6143	5538	3761	3253	5972	9363
4646	3449	5155	7298	4519	11990
5572	3574	4361	9917	4374	9454
3788	3901	6489	6812	5025	10317
6646	5690	4793	3818	4322	10122
5885	3179	3422	3994	4291	11227
4644	3640	4348	3719	6140	5580
5690	3532	3798	3781	5682	11831
4164	4994	5038	3751	8616	11420
5008	3647	4208	9329	5531	12875
3643	3381	4982	3464	4178	5781
5349	8659	3310	3653	5692	10618
3262	6788	4203	4500	3938	13228
3293	3553	5106	5368	3594	9872
4700	4489	3918	3338	5011	13168
8562	3277	3558	3867	3838	5639
4903	4782	3442	3350	3313	5604
5134	3781	4079	4153	3169	12201
4295	4585	3678	4345	5259	4635
4819	3248	5364	4081	11704	11539
6163	3319	4227	3738	5223	11557
12088	5073	3436	5001	6538	11118
4555	5728	4129	3731	4280	12048
5683	3786	3557	4717	8100	10606
4774	5173	4022	3990	5316	11035
5677	3919	4029	4238	5779	4153
6287	3350	5160	6547	5136	5695
11065	7052	4898	5260	4055	4507
6848	7664	4670	4056	3481	10590
4261	3798	3333	4004	4053	10458
5159	4155	4353	3785	4980	6089
7748	5881	5371	5012	5520	15890
3668	3169	6418	3820	3210	13079
6605	3269	3621	3782	4461	9511
4286	3349	6048	7489	4834	11377
5270	3375	4248	6374	4696	6396
4585	3723	5195	3930	11450	8052
4232	3384	3434	9736	4441	11748
5285	3628	3045	5364	5605	14444
4398	4850	3710	4291	4304	12146
5288	3926	3796	3977	3805	5084
3651	8491	3771	3811	6117	9271
4174	6822	5689	5338	3649	4407
6576	3124	3460	4114	3954	13934
5053	4377	4366	3703	4601	13747
3269	6569	4016	5281	3988	5131
3465	4589	4542	3309	3738	7617
4490	3991	4171	4828	3709	7088
8114	3574	5229	4445	4537	9041
4044	4802	3151	4216	3723	8959
7174	5086	4757	4909	5181	3316
4536	4346	3924	4858	6809	7561
5035	3689	4693	3472	4391	10454
14691	3465	3063	9650	5486	14505
4383	3190	4976	5862	4390	10478
4711	10806	3290	4827	4871	11661
5700	5449	3693	5106	4416	8969
3301	4270	4298	5037	4418	8082
4031	3968	4433	4442	4924	12574
8731	3858	5378	5610	3848	8545
5541	3196	5515	4157	3444	10618
6502	5888	6628	10305	7071	12335
5176	3359	5518	5130	3700	12640
5634	4184	4577	3851	3587	5287
4430	3544	3127	4206	2771	14159
5439	4397	4434	4433	4889	10799
13023	4980	3782	3172	4511	10099
4466	3765	3519	4387	5282	10218
4981	3990	4857	3582	3205	9654
6524	8575	4598	4876	3831	4975
4815	5883	3677	4508	4315	10352
4015	3733	3712	4682	3308	9794
5055	3400	3726	4175	6413	8431
4403	3501	4400	3526	4447	5218
5051	3563	3286	5071	5830	10684
5749	3862	3760	4876	4496	9370
4656	3550	3229	6140	4683	11914
4192	3662	3853	5143	4578	12971
5850	3953	4015	5569	5280	5997
3564	3727	3486	3679	5342	13824
3272	5425	3785	5156	3500	11135
5259	3458	5658	4751	4831	6231
8946	4005	4810	5193	5888	11844
5654	3164	3993	4516	4528	5674
4687	5518	4453	3788	4482	10733
3840	9151	4092	5377	4257	9851
5117	5536	3986	4911	5407	10787
5589	3528	7492	3210	6375	6330
11165	5085	4941	9432	3434	14229
4953	3380	4068	5658	4860	11148
3468	4172	3040	5683	3343	12848
3378	3671	4179	3817	4653	11719
11180	4775	3900	4732	12402	10824
5113	7780	3788	4659	5823	24545
7575	4657	4494	3732	5345	9588
4682	5057	4125	3227	5028	12892
5551	4432	3506	4260	4803	12269
4562	5301	4549	3471	4034	11817
9133	5992	4680	6018	3948	9139
6084	7377	3573	6159	5625	12366
5093	3669	3982	4014	3422	5562
4627	3351	4169	11813	6692	14961
5457	3874	3317	3984	4813	9243
4654	4713	5488	6716	12747	10740
6736	4943	3649	4439	5606	11624
4319	3834	3442	3612	11099	5588
6069	3575	3851	4758	3827	10965
4390	5396	4463	4429	3283	9449
4953	5835	4637	3889	5313	11654
4545	3809	3563	9268	3304	5652
3715	3306	3579	4216	8424	10860
5093	7947	5966	5583	3843	13147
3264	5288	4089	4602	6475	6594
3568	4006	6129	3972	4070	11109
6346	3391	3516	3940	4132	4550
7820	3656	3704	3283	45534	9913
3676	3290	3025	3467	6430	8934
5398	5373	4405	3246	3060	12783
4817	7917	3187	5591	32002	16247
12531	5145	3522	3888	4458	12813
4754	4092	4109	4683	3449	13794
5547	3142	4581	4650	4756	10706
11705	3302	5445	4784	4957	10539
5109	4601	3129	4519	4549	17138
5250	4505	3291	5432	3947	6212
4913	4644	4849	4400	5275	10847
4546	4277	4687	4972	5843	10809
5434	4950	5976	4144	4308	16921
11467	4068	5833	4228	4844	11456
4998	5255	3283	6517	5432	8236
4504	5697	5034	3856	8632	7780
3994	3671	6114	6649	5000	10581
5766	3981	4490	3946	7751	11989
5087	3168	3863	5964	6617	6240
4490	4198	3185	6455	7295	9969
5565	8505	5185	4364	3203	8078
7113	4294	3482	4138	5093	8626
3592	5485	4582	4007	5490	6746
4013	3174	3345	12161	3115	9808
3391	3573	3061	5396	5908	8479
6784	3931	5522	4801	14784	11480
4109	4218	4843	3549	4462	4778
4598	3930	4203	4830	4816	10425
5830	4121	3429	4589	5071	11552
3596	3412	3644	5326	4620	10139
4994	3689	4365	4274	6984	12493
4133	3246	4060	5838	5165	9222
8374	4588	3394	4200	3396	9913
4063	5574	4571	4052	4540	7309
4964	3857	3396	5507	7148	11236
3838	8016	4775	3777	6584	6297
11017	5027	5998	4075	4571	6486
6021	3145	4834	4158	3567	10840
4659	4870	4066	4387	5112	6140
11495	5071	4660	12102	3681	11580
6272	3154	3985	3289	5699	9299
5006	4727	6879	6786	5171	12183
5893	3266	3165	4390	2923	14380
5474	5090	3942	4140	5341	9251
7720	4979	4688	9102	3334	9830
4749	4082	4107	4516	4833	12143
4551	5089	3257	10056	3030	3928
4227	3748	6963	5598	3751	11975
5310	3604	4693	4002	5087	11486
4614	3185	4451	3662	3579	14228
4478	4438	5591	3291	4323	11539
5247	7764	5076	4472	3144	9729
3997	5318	3880	4137	3082	13241
6517	3092	5372	3635	2931	12576
4126	3932	4434	5647	4497	12218
3733	4039	4876	4802	3012	14030
3976	3623	3844	6391	4621	6431
4483	5672	3987	5284	4998	12916
3858	3114	3750	4102	3660	11590
4832	4451	4609	5047	3360	9048
7923	3261	3705	7501	4902	13265
8121	3640	4413	4057	4778	14460
4968	3748	4366	6011	3233	10295
4726	4319	3955	3744	5755	11637
3399	4880	5347	3576	4999	12677
4764	3308	3169	12258	8552	9448
11763	3552	5303	4434	3867	11521
6052	3443	4300	4771	3737	15469
3494	3813	3196	3680	4616	12234
10495	8762	3296	5337	3755	13715
6337	4169	5205	3832	8565	13656
4135	5702	3280	3993	4358	8600
4001	4618	3394	3961	4147	13971
7037	3782	4024	3713	3263	9085
10464	3615	7016	4406	4801	9904
4418	3563	3996	4184	3078	8082
3453	3539	3784	4342	46555	14461
6460	4963	4753	11624	7489	11379
4848	3723	3420	5133	32444	10295
7168	3877	6769	4798	3483	9451
3519	5020	3225	4764	4671	12237
5211	4827	3970	4164	7486	11635
4944	3147	4256	4610	5551	12203
4445	4637	3143	8799	3057	9112
4889	3791	3351	3942	3272	10017
4250	7166	3474	9619	6331	8356
5374	6339	4517	3513	5394	11690
3337	3446	3502	4689	4180	7092
5508	3405	4092	3612	3979	8246
3374	3856	3998	3704	6920	7739
3621	3357	3660	4511	8358	10341
3410	5217	3380	5179	7866	8987
9778	4075	3226	3384	4474	9679
6249	4795	3947	5804	4679	7575
4246	3822	5042	4110	3418	5841
4610	3350	4637	5176	3402	10233
8022	5087	6119	3775	5666	6822
11671	4462	3247	4744	6159	9933
6264	3284	5320	5211	4822	13206
6244	8265	3361	4156	6632	4369
10481	6402	3926	5208	5052	11497
3923	4212	5103	4696	5040	10088
4523	5992	3184	5733	3149	7589
7347	4198	5160	6561	4695	12351
5170	3218	6525	6259	6534	12910
5898	3596	3178	3193	3155	14976
12977	4287	3586	3744	5306	14020
5607	3641	4854	4693	5194	9570
4407	3777	4665	4408	4413	8792
4786	6046	4151	4647	5447	9396
5033	3443	3817	7045	4955	9501
3356	3339	3672	10231	5728	5234
5065	4691	3234	4274	3963	13229
4394	4923	5309	4099	4485	4877
4567	3607	3619	4878	6531	7615
3814	3710	4974	4692	3655	11973
5957	3653	4425	4699	4769	10367
5304	5387	5601	4230	4858	11872
4802	4207	3081	5085	3446	4212
4322	3170	3329	3937	4897	10433
7312	4580	5229	3903	4553	13553
4922	4814	3979	4714	4473	10777
5130	3157	4478	11325	4590	14090
3927	4301	3718	3808	4617	10671
4449	6136	3232	3265	4473	13043
5985	5050	3599	3319	3395	3969
11943	5477	4889	3391	4453	11691
4121	4102	4121	9096	34661	6431
6392	4218	5062	4156	5062	4394
14306	3215	3081	6758	5354	10009
8262	6522	3293	3722	6251	11473
6538	3553	5716	4168	4880	10486
7061	4281	4830	4171	3709	11386
4434	6003	4393	3279	4744	10306
4572	4760	5374	6443	4105	9743
11570	4393	6121	3509	3638	11595
5543	4001	5085	4794	5825	6264
4382	3927	3498	4477	5365	9412
3940	6146	4056	3714	3076	11773
3992	7304	4034	6110	4623	12833
4276	3345	3975	3466	11828	8464
5328	4526	3539	3545	6699	7501
3990	5119	4109	5637	3671	15468
4678	3928	3673	5847	5400	9440
4518	5796	3807	5333	2958	5475
6211	4285	4287	4291	2759	8057
5178	3944	4633	4015	4002	15015
7217	3427	4323	3934	3745	3478
4374	4936	3461	3564	4007	10105
4584	5002	3158	3873	4224	10177
3491	3844	3306	3701	4553	12539
4836	5232	3639	4404	6900	10531
4026	4748	4202	6166	4013	10073
4693	3210	4475	8989	3874	5714
4640	3631	3356	7467	4660	9455
5219	4089	3866	3834	3549	11602
7835	4013	3102	5790	3370	8415
3206	3891	3218	5209	3724	11431
3849	3393	4375	4615	4308	13497
4126	5989	6798	6090	6785	9329
3945	3801	5044	3534	3860	9209
5331	4674	6116	5775	3602	7191
5572	4130	3579	4724	6235	12835
5015	6511	4700	5446	3822	4390
14105	4359	3723	4038	3391	8765
6716	3478	4962	5407	3348	11789
5726	3662	4403	9653	5192	10744
3662	4411	4324	3685	4228	10118
6042	5546	4039	6216	5461	13110
9471	4384	3935	6490	3278	11146
6073	7194	4984	4934	6103	10409
5418	3863	4889	11816	2957	8816
3315	4128	3606	3340	3075	5067
4755	5223	3100	4712	3258	10367
4067	4480	4594	4093	4912	11137
11259	4288	4532	3630	4342	13459
3858	5344	3992	3556	4591	3943
4524	4646	3365	4634	6254	13391
4955	3233	3839	3327	3538	11068
6548	7187	3879	3678	4585	10317
6759	4748	4976	5286	5997	12230
4218	4664	3228	5219	5539	9473
3369	3122	4317	3453	5659	11284
3463	5219	4913	3432	3081	8765
5322	4332	3224	3265	5049	15059
5209	4902	3460	3216	4793	12254
3502	3930	3733	4939	4672	9877
5211	3197	6755	5065	4191	13874
5832	5396	4552	3974	4671	12318
4299	3889	4295	6156	3247	11377
3587	4878	4206	5508	4677	14028
3449	3438	3729	3264	5051	11379
3912	4293	3476	4614	3503	3869
4391	4039	3789	4157	6285	13173
11527	3426	3808	3619	3682	10955
4214	3440	4150	3902	5976	10198
4407	5227	3130	5112	3983	4378
4479	6913	3484	4217	3908	12661
4152	3605	5576	5629	3761	15534
5760	4519	3294	11514	4646	12489
5787	5513	5202	5185	4975	4303
9007	4283	3362	5936	4857	10008
4625	5390	3906	4094	5826	9424
4774	3818	4874	3644	5184	11432
5867	4432	3217	5007	6159	12700
4492	3434	6831	3295	5189	10855
5779	5071	3771	5364	3097	7975
10055	5160	4397	3745	6187	11186
3285	4646	5832	3833	5038	5428
6481	4522	3860	6377	3083	8883
7512	3758	5104	3619	5261	14227
3754	4330	4598	3333	6863	8888
11594	3245	4900	3931	6531	10384
6008	4668	7142	10523	5622	5542
5424	4739	4179	6171	3352	11653
3436	4004	5165	3621	5445	11407
4522	3185	4356	3775	3086	12326
5250	4491	3326	3572	4852	11104
3408	4235	4422	8947	3951	12868
3323	3534	4096	3862	16410	3827
4337	5425	4506	4696	3227	10843
6577	3259	3428	3316	5256	6723
3647	3571	3920	3254	2979	11127
4233	3173	3235	4070	3547	11539
5109	4241	3694	3550	3307	10267
4540	4805	3929	4913	5156	11167
5661	3856	3311	4569	3296	9247
3870	5062	4718	3680	5186	5933
5564	3860	3144	3811	3595	5080
3610	3961	5017	5430	3010	14263
4672	3335	3180	3718	4507	12275
7132	4585	4128	6164	4221	9793
5429	3992	4879	4597	7597	12886
4943	4083	3260	4127	3820	8441
3268	3446	5017	4671	4975	10519
3803	5145	4889	3408	3770	7094
4588	3276	3239	4511	3922	11601
5063	4772	4942	3311	3943	12861
3868	4607	3659	5827	3900	11461
3803	3802	3938	3745	4409	11901
11582	4127	3914	5548	3581	9286
5620	4071	3473	5980	7839	8752
4423	5360	4166	3962	4441	14359
5009	3105	5359	4618	4347	10944
5640	4231	3199	4362	4032	26424
11442	3677	3251	5399	3598	12909
4633	4227	5035	9964	3139	5212
5899	4505	4150	4839	5497	13185
5063	3238	3440	4720	3713	12931
10279	4455	3375	3313	10849	10885
5766	5223	3249	3576	3600	11749
3586	3302	5428	4332	4341	9792
11503	4249	4869	3271	15464	10283
5970	3132	5271	4155	4046	12333
5039	3716	4223	4257	4089	11185
4583	3205	5519	4897	3737	9968
6605	4077	4942	9867	6599	12104
4742	5790	4922	4060	3731	13083
5789	3374	4423	3530	3528	8853
4160	4188	4497	3779	3599	9053
3834	3547	6384	6198	4290	15983
4540	3394	3378	3996	3532	13036
4282	3548	4754	4252	7549	10710
6541	3522	3914	4523	5004	12227
5756	5832	3785	5116	12066	11213
3804	3343	3935	5306	4239	9168
4123	3145	4136	4590	4037	9411
3924	3437	3654	3847	6247	10461
4642	4130	3983	3942	3718	10732
3851	4382	3681	4327	4777	10353
8104	4438	3564	4332	4477	11170
3612	4239	4002	3794	5048	10699
5330	4758	3119	3854	4891	8422
6053	3277	3422	4890	5262	7633
4619	4728	3324	3880	7229	11162
4280	3888	3949	4965	5570	17205
3553	3115	4584	6189	4343	9523
5147	3523	4212	4920	4860	9830
11019	3376	5251	5022	6026	9518
5654	4191	5014	5356	4310	13251
4486	3104	3669	4841	5733	12249
4836	3979	5830	4935	5871	10754
3838	3789	4004	3557	6072	11489
9691	5752	3833	5452	3532	14520
7093	4146	6133	7709	6912	7374
4232	4200	5586	3769	6448	10649
6352	3375	4219	4196	5681	5799
6600	4158	4011	6372	3963	3755
4694	3890	4665	5708	7050	15806
6519	3381	3986	3852	4343	10025
11508	3676	3180	3611	5114	10311
4642	3862	3377	4047	4432	10419
4757	4288	4131	4211	5496	9114
5462	4766	3781	4375	3352	10512
4418	3986	5224	4097	5217	10259
4348	6232	5614	3681	5564	9608
4605	4090	4228	3338	6076	9772
5128	4941	4495	12527	3552	7746
6251	4301	4272	4186	3931	10380
6383	3773	3315	5158	5158	5322
6571	3333	3456	3770	5271	10015
3972	4857	4366	3996	5101	10486
5288	3711	3905	3447	4193	12104
3944	4210	4053	3401	5039	9376
4557	3490	4131	8107	6254	14378
4730	5482	5166	5065	7230	11847
4404	4554	4878	5041	4073	12790
5231	4262	3792	3837	10379	10454
4985	6363	3368	3632	5610	3300
7473	3787	5555	4678	5801	4032
5012	3565	4480	4137	4055	11440
4757	4714	4174	4134	3767	12141
6571	6221	3954	4811	4835	12769
6423	3724	5100	3893	4988	14071
11298	3624	4846	5004	6113	10505
5191	4229	4433	4284	3801	9936
5109	3205	3363	3562	5251	11515
4530	5394	3445	3800	4678	8795
5009	3899	3818	3752	5733	12080
10681	4179	3897	5675	4456	9569
6183	5787	5330	5370	3218	6536
5937	3795	3455	4489	4012	7593
5667	3972	3493	4429	4170	5873
5355	3913	4186	5905	3769	8628
5704	3733	4845	3983	3709	10930
4054	3146	4235	5049	4152	11737
10683	4047	3547	13454	6017	10116
4242	3438	3573	3500	6389	9874
3348	5739	4599	6142	5305	15740
4299	4467	4246	3835	5582	12546
5848	3602	4234	6162	3769	9550
5131	3189	4756	5049	3775	11047
3944	4048	3918	6077	2909	12071
3773	5499	4305	4048	3956	11619
4952	3586	4582	4534	5615	10282
4163	3886	4990	4997	4893	7937
3970	3088	3154	5932	3904	11116
4703	4521	5627	5534	4626	12914
3655	3577	5491	4147	3887	11877
4366	6015	3241	4057	3015	11672
4423	3926	4640	4323	5207	9160
7082	4554	4987	6684	5097	9590
7623	5496	4429	4063	3362	12339
4757	3520	3276	9705	3200	8716
4410	4030	4487	3515	5754	11155
4552	4266	3934	3976	3161	9005
4717	5726	4403	3537	2889	11482
12028	8391	3717	3867	7471	10669
7336	3221	5248	4091	2743	11088
6534	3496	5215	3951	5175	9320
4080	3382	5379	4578	8636	12075
5270	6046	5797	4569	6065	9542
6079	3647	4627	5664	4459	10256
9877	3429	3591	3787	5954	9992
7099	4383	5038	4210	3684	6668
5266	4955	4971	3786	4638	10552
4401	5143	5463	3351	4120	11697
4395	3409	3403	4527	4410	7381
8714	4013	3569	5456	3776	10052
3225	4466	3729	4175	6313	4118
6612	5082	5209	4909	3290	9269
5248	3518	4326	4424	6361	9904
3932	3522	3953	4266	12552	8433
5236	3335	5696	5950	3388	8910
4160	4383	3691	4307	7657	5575
3798	4607	3781	4907	5559	9753
4016	5397	4546	4533	5064	11361
5428	4294	3992	6517	3125	9077
3831	3943	3933	3995	5661	17998
3703	3951	4893	3504	6641	9222
3589	3983	4651	10281	6062	9947
4195	5296	4183	3448	5692	8495
3452	4712	6048	5352	4560	12881
5682	4686	3447	4647	6428	14587
7902	4387	6179	3818	4212	7916
4532	3296	5414	4232	4003	9732
4644	3105	4673	3635	5501	12252
5258	4795	5917	3702	3274	8925
4981	3440	4803	3276	10455	12623
12572	5166	3491	4276	4534	6786
3656	3289	4662	3956	11825	9802
4799	5462	5237	4899	4787	12198
5156	3957	3466	3961	7677	11419
5651	4614	5955	3650	4687	11912
9559	3551	4457	3504	5091	12729
6053	4088	3639	4907	3472	11058
6164	3735	3531	11176	4617	11169
6428	4277	3607	3789	4585	7197
4187	5159	3628	3425	3993	10408
6182	4492	4714	4942	7015	7869
11177	3193	3587	4096	4479	8591
5233	4105	6666	4336	4459	10992
5050	3985	4073	3846	3281	13411
4031	5125	6656	5190	5650	13700
7892	4788	3485	4261	5368	13117
5458	5237	4746	4577	4179	12269
6603	6778	5264	5575	33075	13148
4402	3361	3610	5348	6892	11310
4173	4532	4232	5019	5917	9380
5929	5234	3329	3970	4090	11023
3577	5031	3648	3303	6768	11349
3717	3200	4032	3793	8778	10489
4188	3862	4358	3784	6143	10263
3768	3283	4017	4936	3712	11733
7162	4310	4658	4431	7863	14046
3777	3663	3707	6463	3217	11458
4257	4580	3285	3914	6291	8697
4547	4438	3351	5589	4622	5342
4993	5222	4404	3246	3674	19587
3434	4384	4345	6301	5386	9850
5287	5035	3415	4629	4219	4422
5811	4658	3934	5191	3808	8182
9486	4315	6016	5145	5281	11843
5995	4729	6217	9657	3303	15976
3606	3864	3187	6777	3060	13177
11689	3329	4963	5340	3475	13299
4139	4025	4101	3638	3500	13285
12141	4435	3362	3573	3600	10465
6838	3858	3390	4898	4846	13497
5100	5209	5153	3513	4103	10417
5027	3531	5014	3626	6091	7605
5202	3838	3842	4876	4941	8736
3348	5234	3253	3629	3702	7612
9935	5746	3175	3919	5448	13843
6993	5449	4963	3944	3933	14284
5181	4560	3726	4717	5487	11059
3394	4123	4269	4125	3651	7539
5906	4468	3451	3290	6129	12088
5514	3449	3495	12375	3364	13133
3889	3446	3381	4384	3646	11422
3797	4172	3557	4554	2978	13162
4211	4366	4488	4793	5829	9040
3264	4285	4520	3814	6007	10268
4346	3345	5218	3477	4156	13233
6049	3662	5739	5398	3532	12082
6574	6849	4376	3983	6567	9916
5948	4323	4388	5517	8244	14493
4339	3766	5189	3680	3902	6031
5687	4540	3852	4810	5311	4187
8696	3560	5231	4553	4522	10344
4134	3492	5667	4124	4153	8975
3955	4072	3495	4239	3161	12186
6034	4642	3777	4842	4591	9380
4404	4897	4488	4076	6178	6747
3507	5474	4350	5696	5393	8738
3605	3636	3607	4231	4148	8349
12301	4614	4034	4491	6498	12819
10893	4063	4676	4796	4996	3354
6234	3451	4479	5101	5585	4234
5331	5558	3644	6271	3749	11593
4215	3668	4359	7255	5583	11210
4511	4193	5249	4329	3393	12601
5719	4119	4081	5120	3134	12671
4490	4793	3931	3576	4704	10583
4666	3191	3932	4808	6027	13841
6074	3485	4227	8549	4658	8402
5138	4603	6253	4630	3667	11205
3739	4605	3621	5378	4194	4097
3500	3431	4007	4539	5340	8636
5513	4089	3928	3384	6387	9458
5615	5068	5483	3448	7357	13829
5143	3989	5456	5016	3338	10026
3535	3647	6510	3641	4699	5286
3312	3330	4624	4189	9131	9700
4500	4687	4518	5220	7989	9064
3584	3664	4554	4561	6013	10864
4796	3830	3204	3301	17369	9929
4264	3578	6380	12187	3237	11571
6144	5290	3582	3654	4108	10557
10862	3913	5097	3157	5499	13363
4982	4075	3746	4224	3318	9232
4890	3470	3066	4004	3464	3424
4927	3874	5112	5370	4493	10911
4576	3590	4821	3840	4949	10038
6715	4699	5654	3506	6585	12141
5015	6698	6267	5406	3311	10398
4403	4062	3782	3521	4246	11872
5975	4288	5311	3808	7529	12070
4387	4573	5338	3920	7466	12170
3601	3415	4819	3944	6149	6231
4178	3070	9973	4124	4947	12259
12083	4222	3608	5006	4361	9512
10964	4145	4568	4286	2963	9538
6715	4091	3589	6890	5455	12425
5646	6064	3287	4568	7043	15242
5278	3653	3900	5466	39800	11640
4469	3757	3908	4737	3265	12271
4205	4753	3170	4199	3037	8000
5150	4708	5398	3699	3406	9806
5890	3918	4425	5123	4820	11200
4219	3905	4685	5705	6784	10923
4398	4288	3207	3993	3323	13370
5000	3898	6866	3920	3794	10581
4236	3575	3235	4851	5206	14010
3552	3928	7252	3407	4274	10931
5310	4761	3146	8523	7776	14281
5053	5551	4502	4363	4868	12481
3847	5012	7552	3731	5245	4799
4385	3642	4030	3192	5035	5938
3988	4537	4794	3671	6517	10265
4312	3864	4467	4311	8325	4615
4695	3109	5433	4184	4384	12543
3168	3123	4567	5044	3213	13959
9515	3391	3464	3739	3969	14181
4014	4988	3974	4198	4649	14169
5669	4243	3689	4831	4383	10348
4687	3892	3363	6110	4830	16441
6569	4678	3678	5676	4733	14897
4647	4401	3738	4572	3819	11335
4989	3283	3382	4649	3187	9723
3548	3140	3364	8881	4736	13979
3440	5688	3585	3996	3024	7990
4224	4184	3244	4637	3219	8334
5606	3228	3761	4075	3734	15586
3598	3251	4909	4201	4014	11806
12827	3270	4795	3602	4304	10356
5810	4844	5080	4534	3494	11469
11912	4502	4441	3308	4065	7527
6761	3908	4779	4946	5574	14612
3543	3346	3964	3595	3734	11117
4512	3665	3424	4412	5039	9028
3589	4928	4367	4422	4835	4983
5018	5268	4848	4880	3328	11710
6193	6427	3898	3467	3639	11501
3635	3586	4797	4246	4117	11239
4223	4076	5356	4363	3401	9730
4141	4479	4073	3716	3641	11659
4627	4627	5122	4047	2864	7059
3672	4239	3297	4389	3505	9138
3754	5372	3723	3676	18443	11175
4989	3221	3383	4331	3150	10633
3593	4390	3431	3093	4237	9291
4580	3048	4801	4838	30481	10075
3389	3784	3128	4858	3973	5038
4012	4496	3413	4865	3395	8432
4384	5632	7006	3564	4589	11174
3595	3860	4069	5166	39429	10154
4665	3796	4673	4772	2946	10257
4547	3370	3264	3614	2734	8233
8643	3313	4512	7040	3718	11968
4309	4405	4403	4221	3920	8571
4862	3365	3314	6813	2940	10472
3709	3917	6647	4207	8142	11355
4116	3373	3536	4256	4509	10197
4191	4099	4282	4682	3362	11107
8706	4368	4214	3782	6904	5248
4049	3398	5299	3691	4022	9737
6050	3525	4965	3976	3948	9391
4169	3644	4029	3284	4729	10668
4253	4165	3943	4461	3991	11831
3208	3552	3659	3359	4044	12840
10925	4316	4643	4825	4502	10812
6163	3127	3644	5070	3231	10741
9357	3227	3201	5407	7137	11311
5214	5492	3916	4212	6011	11064
5216	4101	4862	8131	3620	13186
5743	4381	3545	4736	4990	15407
3891	5152	4229	3741	3214	10412
4081	3525	5000	4296	4742	13201
6932	3266	4329	3971	3276	12470
5026	3760	3218	3397	6202	10915
4858	3128	4430	5186	4414	10366
4348	5121	4128	3257	4719	12777
6133	3614	4648	4172	3872	9962
5066	3986	5100	4903	8047	12082
4204	3202	3816	4029	4616	12322
4468	3715	4293	4516	4518	4188
4133	6569	4941	6007	3820	15024
3593	4546	3971	3796	4847	13904
4481	4323	3628	5947	5752	11611
3875	3507	4869	4374	8717	9547
4387	4497	5230	4559	3860	9507
4444	4110	5586	6181	4621	7800
3467	4887	4012	4368	4717	11487
8599	4180	5395	4105	4669	10012
4151	4092	3889	5612	8333	9629
3885	6129	3598	3748	6012	10839
5179	3721	3599	3484	4017	11708
6522	4510	3355	5853	5332	5742
4219	7192	3533	4538	5706	12480
6493	3999	4162	4453	4582	13128
4858	3890	5760	4204	6103	5755
4238	3387	4438	5140	3735	10691
3722	4197	3945	4004	3108	9204
4010	4627	3745	4853	6046	10262
11827	5897	3191	4694	2908	12591
11517	3346	3374	3843	6419	9550
4912	3619	3270	3233	6824	5546
7270	3791	3476	3253	10780	8260
7168	3122	3553	4289	3214	11174
6713	4649	3642	4048	6395	10327
6571	4956	5133	4480	3886	9666
4200	3843	3703	5031	5814	10979
5734	6069	4611	3530	4734	11393
4500	4426	3182	3585	4027	13570
4699	4405	4282	8226	4175	12922
5402	4590	3477	3452	4527	8347
5188	4354	5058	4020	4360	14116
4328	3834	4596	3771	5874	11910
5007	3421	5908	3963	5784	8078
5684	4759	3402	4535	5347	13298
3701	3113	3285	4647	4428	10597
3756	3199	3953	4643	5760	11106
5991	3989	4793	3806	5085	5904
3465	3649	3514	3653	5894	12469
7525	5413	5255	4896	5827	9130
3818	5925	3319	4588	6902	9729
3212	3580	3635	3640	4421	12527
5548	3063	3394	4441	4133	3677
5016	3325	3592	5318	5151	12139
6015	5232	3614	5034	4534	10531
4951	5172	4311	4679	3573	8481
6071	4642	4719	4138	4684	11831
4067	3477	3184	3666	5006	10162
3926	3713	4502	3888	5747	13034
3936	3781	3328	5401	3865	9349
10898	4999	3691	3925	4559	7207
8684	4974	3714	5144	4984	7861
4609	4634	4329	4569	4904	9761
6789	3337	5185	4466	4266	8680
5073	4804	4197	4670	5696	9910
4141	4944	5000	4524	3256	10204
4616	3939	5258	4036	7767	10673
4252	4039	4863	4068	4344	11568
3687	5322	3153	3565	3805	9289
3789	3708	5663	4717	4910	4666
5646	6014	3296	3529	3006	9301
5035	3340	3418	3574	3320	9823
7317	3559	3603	4302	5229	10522
4230	3274	3502	3942	5699	8941
4539	3589	4037	3269	4392	15722
3134	4589	4120	4370	6356	11869
3827	5038	6646	10685	3899	8677
3858	3587	3597	3172	6470	13601
4454	5320	3274	3643	4445	9265
7793	3757	4114	4552	2930	4782
4297	3954	3476	3771	3434	11630
3481	4148	3749	3735	3284	10860
5071	4481	5813	4116	4333	9700
3647	4756	7415	3811	3532	9883
4947	7236	3762	3488	4583	5164
6792	3213	3441	3822	4320	12179
6215	3432	3879	4641	3373	13198
5752	3483	5079	4527	2943	15062
3778	7941	6705	3680	3913	12598
6476	5504	5502	4916	3613	12481
4114	4368	3351	4538	4801	5880
5006	4467	3371	3984	3146	11838
14239	3165	3433	3142	3431	11305
10293	5760	5600	5213	4817	10366
5554	4270	4493	3548	4176	10390
3496	5070	3801	4488	6253	3426
5975	4710	4213	3253	7177	8602
6298	4245	4820	3757	4906	5966
3552	4046	3577	6860	3110	13883
4439	3420	4181	5775	5482	12974
3406	5123	4458	3613	2957	14202
4601	3505	3674	3457	5366	12860
4892	3734	3283	3377	6325	12709
5170	3231	3707	5332	4012	12693
4233	5934	3230	5157	4361	12570
10814	3544	3428	3978	3734	9514
5443	5557	3674	3696	5161	11355
3882	4117	5159	3652	6080	7694
4116	3532	5103	4798	5683	15133
3267	3577	4225	4309	4411	12540
3666	3128	4772	3356	4885	13199
4030	3468	4455	5419	4057	10036
4132	3527	3977	4450	7185	14406
9341	3614	5347	3920	3916	10195
4486	5234	3216	3843	3329	5967
5051	5802	3885	3789	3578	9848
5286	3332	5400	4728	4415	11629
7794	3668	4098	5382	5608	11755
5374	5952	3683	5758	5302	7653
5099	5191	4975	9768	5128	10243
8414	3917	3225	3702	3279	13157
4152	4723	4049	4757	7065	11626
4026	3852	3765	5171	3684	12016
4733	6376	4354	3297	5914	8911
3487	5104	3683	4079	5681	11757
3701	3227	4859	3703	3378	10300
11637	3455	4039	3472	7928	7748
9136	6814	6172	3478	5419	9533
6062	5273	3610	4889	5994	12643
4450	4107	3316	5032	7974	7254
5144	4081	7171	5154	4164	14410
5071	4046	4096	4392	4852	10719
6810	5488	4095	4169	3312	4974
6472	4844	5713	6863	4497	15197
4352	4909	3827	4811	4554	10092
5057	3502	4173	3830	3694	10356
4831	4156	3889	5403	4448	11260
3934	5761	5798	3949	6956	9683
3680	3314	4002	4856	4418	4718
6473	4461	3177	5150	2983	8096
3306	3236	4232	4881	4620	9187
4066	3653	5386	5478	3672	9670
4308	3160	4568	5353	4062	4398
4448	3140	3298	3740	4186	3570
3751	3419	3154	3917	3445	10142
3961	5214	3952	3374	6098	11472
7907	3221	3140	3259	5383	6142
4804	3799	4915	4137	13929	5037
4838	4971	3594	5726	5492	5513
4136	4993	4679	3980	3490	10249
3551	3194	4322	3256	15524	8656
6831	4513	5396	3898	3790	12857
5150	3693	3908	5137	4298	10626
4766	4200	6176	3648	3886	4426
8281	4560	4086	3221	3299	13760
4642	3714	3995	4076	3134	16042
3919	4365	5863	4516	4301	12035
3906	5553	3761	4156	4939	10192
4636	4903	3642	3558	3257	11925
3814	4441	4207	12030	5294	12951
12898	3628	4108	4226	3141	10759
11793	4310	3131	5090	3082	10865
5036	3728	3207	3784	4698	7718
4197	4009	3491	3902	4086	9345
6397	3288	3648	5025	4631	14139
5172	3654	3334	5157	14201	3350
3848	5329	3555	3401	4358	12098
5606	4761	3130	3578	3677	9167
5860	4246	4593	4583	4175	9450
4809	4139	3560	4249	4049	7858
5103	3897	3388	5165	4609	10237
9150	3824	3726	4394	4920	11499
3145	4527	3307	5027	4296	14079
4562	4878	3997	4341	4739	9521
4815	4142	4252	3533	7993	13456
3750	3905	3308	4299	3907	14744
4633	3827	4542	3743	9547	8484
3973	4988	3224	5281	3193	11607
6385	5861	4748	3198	4477	14891
5936	4183	4248	4023	3149	14657
3828	4728	3316	4686	4136	7986
3574	5084	3278	6012	3479	11151
4759	4506	4360	3564	6335	8628
8495	4189	3270	3543	5267	7204
5204	4077	4237	5102	3415	11170
6834	3796	4404	6420	4037	13424
5529	5755	3112	4717	3466	10583
3722	4868	3150	5059	3770	13674
6785	5164	3340	4342	7326	13415
5977	4941	3443	4205	4924	11675
3387	3437	4852	4336	4194	9506
14636	4026	4346	3425	5486	6395
11149	3629	6009	5425	3446	8522
3670	4128	4353	3993	7031	15528
3855	3701	4504	3835	9849	8600
6506	3212	5369	12142	5358	10665
4217	5545	5978	5005	4904	11530
5145	4889	3384	3581	5170	13240
8753	4512	5527	4838	4154	5816
6777	3294	4781	3941	6613	9622
5231	5034	3259	4420	5706	12573
4395	3257	3830	3635	7280	11288
3838	3451	5696	4208	4339	4820
5753	5387	4241	4734	6007	6867
3802	5173	4620	3821	4019	6078
4214	3854	3289	4503	5731	9105
4185	5217	4886	3529	3809	6966
4023	5229	3345	3814	3885	3355
3750	4684	3204	5385	6043	14037
4072	7265	3464	3530	5081	7325
7394	5512	3240	3923	5361	5779
4457	3452	3781	3523	3993	12405
4013	5749	3203	5902	6010	10199
7020	3831	4493	7441	4642	11439
5818	4859	3732	3736	4412	6728
6043	3540	4200	3630	5284	10251
6332	3835	3572	5760	4283	8381
5055	5975	4135	3341	7810	12801
3709	4057	5932	3598	3893	9579
3990	3582	5501	4042	5216	13157
11975	3597	3930	4111	5137	8689
12636	3242	4492	4191	6165	11269
6103	3775	3637	5022	3692	11450
4198	5286	4806	3399	3291	5163
5518	5534	4539	4640	6705	8415
6106	5067	4497	3610	4431	7092
4564	3517	4452	5059	4961	11896
4946	5647	3580	3941	3285	9052
4834	5144	3799	3446	6314	6453
4344	3926	3438	3368	3270	7804
5473	4102	3575	3614	4322	10874
5598	3679	4562	4428	5710	9643
3459	4836	4872	3651	4803	10543
3177	5665	3890	4023	4307	12854
3908	3419	3531	10553	3502	5649
3289	4920	5283	4475	5203	6502
3825	3861	3595	4354	3257	6384
4406	3892	4304	3169	4455	13250
7113	3846	5205	4007	4755	10198
4663	4207	3294	4997	6502	12934
4751	4260	3607	4780	5196	12534
4675	3485	3494	3185	3250	10325
7037	4415	4369	4767	3333	16133
5962	5468	5320	3167	4862	11236
4088	3666	5575	3625	4371	11726
5540	6150	4654	4075	6204	10555
3679	5090	4895	6713	6811	7226
4775	3985	4029	6287	12177	12019
9090	4544	4600	4648	4158	11996
11323	3398	4311	4501	4224	13939
6105	3375	3654	5167	4628	10450
5624	4356	5594	6680	4100	12854
4279	6043	3355	5247	3296	12303
3974	3442	3493	4269	3123	12656
5122	3208	6479	3689	3882	10211
4264	4275	4469	5326	3090	10682
4108	3705	4397	3245	9331	14866
4231	4767	3603	5732	6949	4218
3817	3907	3344	5905	4572	9795
3358	3946	5133	4421	5646	13234
4586	4243	5010	6117	4369	7093
4719	4881	3941	3889	4770	3887
6087	3727	4152	5843	3987	4392
4374	4660	4956	5193	5154	11460
5648	6244	4961	3951	2970	13165
4558	3400	4205	4296	5592	7524
5225	4154	4000	3338	4142	9513
3550	3572	4219	3329	5576	13139
6896	4394	5013	4265	5392	10016
7198	4202	4167	4165	6656	5320
3190	3475	4105	6576	3756	11677
4422	4248	3515	4309	5100	10721
3586	5007	5885	4487	6292	12775
5255	3452	4712	4185	6762	6798
3815	3575	4071	4101	5038	11413
5501	5234	4767	4449	5073	13669
4560	3273	3956	4466	3515	10123
4430	4197	3459	4903	3563	10312
5384	5591	3539	3867	4513	12367
4019	3236	3335	3140	3725	17210
3603	5727	4810	5066	5997	8735
8377	4980	5217	5036	4227	10045
13175	3522	3171	4725	8424	15879
5621	4478	3329	3688	4028	14328
3849	3626	4511	4989	5578	9233
7662	6020	3051	7078	3122	12539
4723	3343	3331	3378	4055	9323
6508	3477	3583	4178	2946	12213
5287	3196	4438	3854	4583	8437
3665	5264	4558	5480	6127	10470
4097	5622	4458	4384	5515	12033
5756	3123	3894	5292	9828	11983
5850	3978	4055	3482	5593	5893
5532	4105	3404	4306	5682	9596
4037	4302	3600	3613	5782	12026
3791	5936	3680	4017	5867	9053
4604	5252	4019	4292	4739	10468
4549	4882	3673	5022	4537	8218
3383	4331	5982	3490	5415	12177
4518	3710	7077	4086	3999	10383
6234	4029	3464	3697	4821	9755
5405	2941	3668	3533	4561	8884
3890	3928	3949	4127	4595	10218
6981	3358	3870	3327	5458	9937
6153	3503	4074	3608	6108	9786
6215	3928	4381	5571	4607	8337
3342	4682	4215	5305	3050	9884
3221	5058	5035	6036	15032	9418
3534	5560	3744	4802	6163	5550
4126	4195	3897	4140	7985	12635
8530	3273	3608	3764	4446	8914
11044	4200	4766	4062	5407	10444
5758	4642	4197	5438	8040	11805
5768	9337	3687	6179	4115	14229
4284	3333	3760	5165	3146	12778
5467	4033	3690	4554	3705	9238
3962	4180	5644	5800	6550	12646
5995	5252	3165	5223	6776	10790
5559	4557	7319	6643	4998	10880
5050	3456	4447	4472	5491	14518
4100	4284	3653	6526	5027	13221
4181	4836	4851	3260	4992	11675
7810	3751	3263	4682	3310	7780
5260	4706	3827	3247	3836	11544
4329	3792	3911	4790	4117	5760
4825	3489	3209	4163	4094	9299
4760	3877	3194	3509	4931	14510
3952	4399	3133	4736	7617	10478
4156	3818	3365	4045	6811	12080
4954	4877	3117	5395	5061	14422
4014	3541	3569	3466	3223	14025
4069	3264	3825	3802	4202	12167
5088	4500	3130	3767	5304	11927
3895	4177	3721	3902	10155	11129
4990	4257	3274	3654	5383	10241
5323	3167	4599	4649	3802	13677
3911	4931	4904	4939	3108	8792
3718	6432	3630	3190	3618	7106
5912	3883	6124	3781	3145	13374
5628	4231	3851	3603	4142	19496
3964	3626	4320	3399	3358	11910
6964	3171	4276	3948	5597	13406
9021	3428	4131	3856	16372	5470
5055	4094	3586	3674	4465	16083
7632	3313	4234	5071	4619	15600
5071	3663	3475	5025	3106	12131
4345	3495	4333	5153	3039	13453
3449	7336	4269	3124	7610	5986
3764	3433	4448	3217	4551	13021
6260	3498	5156	5048	3058	11002
7025	3669	4909	3889	3447	17438
3571	4029	3716	5489	8886	10791
11150	3611	4252	3166	3831	3618
3560	4059	3316	5985	3382	10638
4947	4001	4890	4192	3419	13022
5853	6471	3924	4139	6277	10893
6992	5673	4871	4176	4396	15663
4996	3256	3605	5122	3518	8035
3950	3466	3540	4959	6308	7752
5007	4661	4182	4402	6321	11012
4382	4292	3073	4067	4401	8847
5484	4373	6684	4918	5295	4121
4095	3328	5827	4685	5225	8086
3402	3058	3973	4528	3834	14291
6872	5873	4194	4343	3343	9067
10912	3298	3887	3590	6010	14419
5282	3756	3160	5275	4128	10965
4762	4404	4621	5241	3431	13439
3745	3865	3630	4669	8388	11147
6519	4202	3227	4069	4434	11396
6881	3915	4142	3171	3927	6260
4305	3238	4015	4184	4940	11532
5493	4165	4490	5088	3551	7866
7053	4461	5435	3698	3564	9635
4203	4269	4041	4844	46679	10594
10030	4333	3493	3762	3840	11102
3718	3466	4004	3904	4086	6336
3464	3082	3900	3573	5188	10291
3808	4547	4241	3723	3953	11517
3937	3077	4721	3261	3308	8454
3821	4312	3423	5020	4272	6189
6989	2983	3607	3815	5388	10910
4163	3263	3268	3172	6995	10582
5108	3171	3891	3148	5016	6527
9189	3506	4296	7896	5279	10614
4207	6287	3867	4045	5130	11474
3714	3813	4310	3744	4249	12511
4702	3021	4415	5391	4811	13865
5051	3299	4523	5828	4462	15015
4987	3430	3987	3914	3210	9336
7739	4159	3674	3733	6198	11202
10586	3141	3638	5474	3356	8684
5111	3770	4297	3851	5500	7028
5310	3964	3961	5001	5156	10733
3827	3666	5062	5748	3827	11934
5655	3909	4744	3380	4897	8741
5942	3788	3607	4628	4722	6730
5975	3483	4276	4414	4201	10699
7463	3886	4735	4853	3742	7725
12407	4120	3202	3686	5270	9756
3348	3180	3113	4276	6330	11712
6030	5059	3688	3192	4943	12738
4068	4699	4045	3833	3626	11176
4564	5629	4284	4633	7460	11896
3894	3936	3501	3390	3731	11378
3492	3842	3595	4146	9750	11133
3360	4381	4952	3765	8125	10664
3770	4775	3910	3189	12238	8106
8734	4042	4321	3520	6026	5267
6837	3941	5363	3657	3880	5401
3957	3916	3816	3960	3115	15315
4403	5855	3921	4059	3077	5083
4728	3374	4136	3824	4862	11698
4373	3578	3310	3322	3929	13725
7121	4106	3136	3775	9974	7699
5754	3582	3376	3442	12291	18166
5964	3297	4058	4057	4798	9966
3695	5343	5975	3325	4419	7648
3295	4887	4248	3493	5303	10762
3826	4198	3124	5496	5109	11772
3628	4410	4021	3234	4330	10688
6139	3110	5474	3714	4948	8265
5547	3693	3397	4180	3237	4676
4584	3258	3197	4343	3246	5524
3643	3455	4568	4846	4185	13704
6963	3364	3573	3869	5785	18174
5654	4104	4495	7155	2953	13968
4911	4949	6849	4459	4426	10956
6440	3440	5299	4144	5371	14675
14418	3196	3892	3398	6226	8760
3395	3355	4777	5099	4998	11959
3883	3272	4113	3526	5022	11892
6350	3264	4747	5877	4918	9889
4220	5766	4739	4712	4909	9151
3195	3085	4763	4100	4418	5635
4080	3587	3829	5969	5304	13981
7871	3627	5962	4754	3656	9859
3969	4529	3347	4192	5243	4363
6262	3113	5404	4750	4318	14645
3935	3865	5058	3900	4342	10913
4985	3395	3753	4365	5981	9145
5421	3946	4530	6208	4819	12289
4161	3906	4590	5036	4852	7628
5514	4438	3848	3525	3720	6941
4562	3524	3154	5400	5826	9446
6544	3805	3567	5123	4704	9865
6470	3754	3753	4686	5738	12974
4216	4102	4975	4317	4556	8897
5667	4381	3641	4833	4596	4253
4965	5224	3091	3177	4438	12187
6797	4181	4490	4026	3840	12468
6832	5010	4282	4242	4838	6595
5652	5022	6292	5317	7416	12337
4279	3838	5038	3539	5709	4436
12695	3199	5046	4428	3302	11907
3887	4119	4474	5810	3993	12620
3344	3571	4088	4596	4121	9649
3617	4729	4472	3359	3148	6491
3244	5950	4413	3586	3968	12233
4804	4684	4119	3896	28361	10993
8019	4860	4709	4275	3651	14035
5013	3862	4319	4464	23806	12297
4320	4216	4187	5025	4913	11221
5089	3317	3241	6794	5075	14355
6259	3721	4525	5353	22741	16191
4348	3650	3207	4056	4566	10260
4258	3789	3162	6334	6558	11074
5960	5864	4752	3697	3226	12146
5532	3651	3700	5369	4783	13746
4427	4302	4584	5700	3335	5944
4226	4550	4455	4474	3760	13130
4958	4014	3850	4466	3186	8872
10542	3719	4326	4191	4422	13146
7285	4161	4511	4253	3328	11447
4581	4054	4068	3208	4833	11776
5920	3842	3710	4398	3199	10950
6092	4771	3101	3807	6570	12191
3773	3309	4857	5341	5080	10636
4987	3636	4060	4190	4239	15450
4777	4171	3494	3506	6718	9840
10135	4413	5074	5475	8050	9410
4917	5426	3315	3345	4428	13073
4334	5565	3593	3790	3030	11130
4018	3796	4156	4627	4875	12647
5857	3165	4540	4370	4196	10322
4350	3711	4171	3306	2949	11644
4429	4449	4163	3918	5674	10613
8615	4835	3742	4313	4602	10713
5286	3761	3709	5701	3133	10979
4332	4263	5066	4471	6280	10193
3882	3208	3724	3546	15122	9030
8620	3580	4149	6094	3218	10039
6296	3206	4105	4151	3724	4860
3754	4194	3349	4532	3601	7700
4446	5106	5457	3946	3306	12357
4517	4319	3196	6306	3119	10695
3751	3253	5988	3581	4869	11763
5763	3596	3670	5136	2876	12069
4485	3841	4307	3773	4102	9859
5617	3574	3137	5954	3646	12763
11320	7107	4534	4918	5648	10624
12467	4644	3290	4414	4943	8761
5733	3586	3212	4789	3968	9989
5759	4332	4960	5854	4683	12941
6782	3660	5593	6375	3566	11936
4137	3188	3650	5931	3858	12077
4386	3267	3426	4522	4856	9013
4793	5223	3618	4089	7751	10906
11752	5376	3213	4983	5921	10531
4526	3615	5098	4223	5072	9669
3219	3192	4384	3311	4223	11433
3465	4551	4339	3961	3006	10635
5242	3629	3451	5479	3661	11196
4364	3610	3363	3869	5660	9649
4155	4292	4273	5251	5426	7097
4757	3601	3369	3826	4111	8793
7818	4432	5327	4362	3880	12328
4741	5256	3692	3147	4419	10148
4606	4508	3143	4198	5491	11797
5786	5662	3902	5764	4241	7693
8165	3474	3789	4227	5532	13639
5202	4011	4190	4325	4388	11309
4382	3193	3234	4295	6323	12771
5369	3822	4991	4562	5440	12190
3723	3931	4365	4890	6727	3628
4373	4861	4100	3373	5113	14152
7624	6727	4316	3414	4775	9208
11574	3957	3879	5013	5426	9978
11962	5476	4311	3243	13979	13517
5165	3375	4166	4330	4767	6316
4010	3488	4602	4974	3078	12934
5082	3653	4427	3549	4699	12884
5410	5958	3663	3843	2990	9243
6239	5670	4227	5088	7109	11859
5786	3346	4075	4704	6348	11751
4572	3400	3202	5789	4420	12875
11404	4565	4721	6786	3053	12075
3960	4851	3583	4490	4466	8816
3913	5441	3991	3979	3879	11113
5243	4679	3434	4167	3415	8818
4753	4848	3257	4302	5410	11461
3679	4132	3727	3740	4662	11749
5059	4263	3344	3802	4504	10242
8926	5175	4479	5095	5879	11681
6365	4398	3488	4620	6841	16316
4548	3888	4357	4613	6687	15178
5514	3330	4197	3842	5247	10567
5443	3927	3418	3539	4943	13444
5013	3794	3093	4818	4049	9445
4144	3035	5017	3976	4746	15669
4441	3732	5396	4608	6825	7440
4860	4421	6970	3141	4285	11254
4931	4326	6354	5237	3085	9676
4313	3849	3779	3270	4749	13881
9501	5470	4142	3746	3228	5136
6672	3393	4181	4137	3834	11112
[truncated: 21,308 more rows]
