# Supplementary material for: Membrane-mediated dimerization potentiates PIP5K lipid kinase activity
Source: eLife. 2022 Aug 17;11:e73747. doi: 10.7554/eLife.73747 (PMC9470164; doi:10.7554/eLife.73747)
Supplement: Figure 1—source data 8. [file elife-73747-fig1-data8.xlsx]

## Sheet: Figure 1J
Figure 1J
step size (µm)	mNG-5KA PD	mNG-5KB PD	mNG-5KC PD	mNG-z5KA PD	mNG-yMss4 PD	mNG-4KB PD
0	0	0	0	0	0	0		PD = probability density, which is the frequency divided by the bin size (0.01 µm)
0.01	0.407149	0.276373	0.436932	0.475024	0.480941	1.41062
0.02	0.394291	0.458662	0.591403	0.437913	0.451253	1.70877
0.03	0.645009	0.687992	0.816489	0.649447	0.679848	2.82925
0.04	0.91287	0.864401	1.13426	0.866548	1.00344	3.57624
0.05	1.12073	1.17018	1.50057	1.22467	1.19344	4.4178
0.06	1.46788	1.51123	1.63739	1.38239	1.43985	4.86343
0.07	1.55359	1.57591	1.93751	1.57723	1.72485	5.30264
0.08	1.73574	2.08162	2.07432	1.72196	1.87032	5.62324
0.09	1.88574	2.0581	2.295	1.7999	2.00986	5.7627
0.1	2.14503	2.31095	2.6569	1.96875	2.20283	5.79956
0.11	1.99074	2.35799	2.77606	2.77592	2.37501	5.65049
0.12	2.74932	2.66377	3.12472	2.16544	2.62142	6.46961
0.13	2.47289	2.65201	2.8555	2.17101	2.46705	5.14074
0.14	2.58432	2.9225	3.23506	2.40481	3.22111	4.81053
0.15	2.56075	3.0107	3.12914	2.42337	2.79361	4.48192
0.16	2.66361	3.07539	3.25713	2.57738	2.70158	4.08117
0.17	2.60147	3.18123	3.16886	2.41965	2.87971	3.75898
0.18	2.91647	3.19299	3.31892	2.63675	2.84408	3.38548
0.19	2.72147	3.00482	3.17327	2.50315	3.05189	2.94306
0.2	2.8479	3.05186	2.96584	2.54583	2.86783	2.61445
0.21	2.80718	2.74609	3.32333	2.61263	2.95096	2.26019
0.22	2.74932	2.83429	3.16445	2.92437	2.83221	1.97166
0.23	3.07504	2.84605	3.26154	2.58294	2.84408	1.98288
0.24	2.8329	2.90486	3.03204	2.47347	2.71642	1.40741
0.25	2.6529	2.65789	3.06294	2.49573	2.86783	1.32406
0.26	2.64861	2.63436	2.67455	2.42893	2.44627	0.981021
0.27	2.55432	2.68729	2.49801	2.41223	2.67783	0.836753
0.28	2.60361	2.66965	2.57304	2.29348	2.60361	0.687676
0.29	2.40218	2.46384	2.37444	2.24152	2.44923	0.652411
0.3	2.38289	2.10514	2.2641	2.17843	2.27408	0.458451
0.31	2.21789	2.1757	1.95516	2.15245	2.22955	0.411965
0.32	2.13646	2.12278	1.81393	2.18956	2.28001	0.362272
0.33	2.07432	2.26391	1.79628	2.1172	2.08704	0.314183
0.34	2.05717	1.89345	1.89778	1.93164	1.89704	0.272506
0.35	1.91788	1.86405	1.73449	1.84629	1.76048	0.192357
0.36	1.87717	1.54063	1.46527	1.73495	1.62095	0.189151
0.37	1.67574	1.71704	1.45203	1.69042	1.65657	0.133047
0.38	1.61788	1.31718	1.31521	1.61991	1.54673	0.10259
0.39	1.45716	1.43479	1.32404	1.47332	1.33891	0.113811
0.4	1.29002	1.56415	1.03275	1.49187	1.43095	0.062516
0.41	1.28573	1.31718	1.06806	1.37497	1.30329	0.0577071
0.42	1.22787	1.15841	0.86945	1.33229	1.11923	0.064119
0.43	1.07573	1.04081	0.85621	1.35642	1.08063	0.0528982
0.44	1.18073	0.940844	0.719393	1.09664	0.970787	0.0464863
0.45	1.06287	0.764436	0.710566	1.03355	0.914381	0.0480893
0.46	0.878584	0.670352	0.622297	0.968604	0.893599	0.0240446
0.47	0.891441	0.670352	0.631124	0.918504	0.727348	0.0320595
0.48	0.752154	0.64095	0.529614	0.87397	0.662035	0.0368684
0.49	0.726439	0.605669	0.476653	0.786759	0.718442	0.0240446
0.5	0.69001	0.62919	0.37073	0.747792	0.584847	0.0160298
0.51	0.625723	0.464542	0.335422	0.760781	0.504691	0.0176327
0.52	0.570008	0.435141	0.300115	0.684703	0.439378	0.0144268
0.53	0.522865	0.499824	0.361903	0.630891	0.498753	0.00801488
0.54	0.452149	0.411619	0.24274	0.604914	0.38594	0.0128238
0.55	0.398577	0.364577	0.216259	0.536258	0.356252	0.0064119
0.56	0.405006	0.352817	0.233913	0.421213	0.38594	0.0112208
0.57	0.347148	0.20581	0.180952	0.530691	0.320627	0.0112208
0.58	0.338576	0.241091	0.136817	0.395235	0.276095	0.00480893
0.59	0.276433	0.276373	0.154471	0.417502	0.26422	0.0064119
0.6	0.257147	0.235211	0.101509	0.389668	0.228595	0.00160298
0.61	0.252861	0.229331	0.119163	0.29689	0.207814	0.00480893
0.62	0.218575	0.188169	0.0617883	0.293179	0.187032	0.0064119
0.63	0.169288	0.0999647	0.0662018	0.272768	0.175157	0.00320595
0.64	0.143573	0.164648	0.048548	0.239368	0.127657	0.00160298
0.65	0.156431	0.129366	0.0662018	0.231945	0.127657	0.0064119
0.66	0.154288	0.0764436	0.0397211	0.159578	0.130626	0
0.67	0.145716	0.0882042	0.0264807	0.217101	0.103907	0.00320595
0.68	0.0814297	0.0588028	0.0264807	0.181845	0.0682817	0.00801488
0.69	0.132859	0.0470422	0.048548	0.211534	0.115782	0.00801488
0.7	0.107144	0.0352817	0.0353076	0.154012	0.0860943	0.00160298
0.71	0.0707153	0.0411619	0.0353076	0.148445	0.0653129	0.00480893
0.72	0.0857155	0.0176408	0.0220673	0.131745	0.0534378	0.00160298
0.73	0.077144	0.0352817	0.0176538	0.126178	0.0564066	0.0064119
0.74	0.057858	0.0117606	0.0088269	0.1169	0.0653129	0.0064119
0.75	0.0471435	0.0294014	0.0132404	0.089067	0.0296877	0.00320595
0.76	0.0557151	0.0176408	0.0132404	0.089067	0.0326565	0.0064119
0.77	0.0685724	0.0294014	0.0176538	0.105767	0.0415628	0.00480893
0.78	0.0685724	0	0.0088269	0.0964893	0.0178126	0.00320595
0.79	0.0342862	0.00588028	0.0176538	0.0668003	0.0267189	0.00160298
0.8	0.0428578	0.0176408	0.00441345	0.072367	0.0296877	0
0.81	0.0428578	0.0117606	0.0088269	0.0853559	0.0148438	0.00160298
0.82	0.0450006	0.0176408	0	0.0705114	0.0178126	0.00160298
0.83	0.019286	0.0117606	0	0.0853559	0.0148438	0
0.84	0.0235718	0	0	0.0797892	0.0118751	0
0.85	0.0257147	0	0.00441345	0.0705114	0.0148438	0.00160298
0.86	0.0321433	0	0.00441345	0.0463891	0.0118751	0.00320595
0.87	0.0107144	0.0117606	0.0132404	0.0575225	0.0207814	0.0064119
0.88	0.0257147	0.0176408	0	0.0445335	0.0118751	0.00320595
0.89	0.0171431	0.00588028	0	0.0575225	0.0178126	0.00160298
0.9	0.019286	0	0	0.0519558	0.00593754	0.00320595
0.91	0.0171431	0	0	0.0445335	0	0.00320595
0.92	0.0128573	0.0117606	0	0.0408224	0.00296877	0.00320595
0.93	0.0128573	0.00588028	0.0088269	0.0482446	0.00296877	0
0.94	0.0171431	0	0	0.0445335	0.0148438	0.00320595
0.95	0.0214289	0.00588028	0.00441345	0.0334001	0.00593754	0.00480893
0.96	0.00642866	0.00588028	0	0.029689	0	0.00320595
0.97	0.00214289	0	0	0.0463891	0.00593754	0.00160298
0.98	0.00428578	0.00588028	0.00441345	0.0389668	0	0.00160298
0.99	0.00428578	0	0.0088269	0.0222668	0	0.00320595
1	0.0128573	0	0.0088269	0.0315446	0.00296877	0.00480893
1.01	0.00642866	0.00588028	0	0.0222668	0.00593754	0.00480893
1.02	0.0107144	0	0	0.0148445	0.00296877	0.00160298
1.03	0.0107144	0	0.00441345	0.0389668	0.00296877	0.00160298
1.04	0.00214289	0.00588028	0	0.029689	0.00593754	0.00160298
1.05	0.00857155	0	0.00441345	0.0371113	0	0.00320595
1.06	0.00642866	0.00588028	0	0.0241223	0.00296877	0.00160298
1.07	0.00428578	0	0	0.0222668	0	0.00320595
1.08	0.00642866	0.00588028	0.00441345		0	0.00160298
1.09	0.0128573	0.00588028	0.00441345		0.00296877	0.00320595
1.1	0.0150002	0			0
1.11		0			0.00296877
1.12		0			0.00296877
1.13		0			0
1.14		0.00588028			0
1.15		0			0.00296877
1.16		0.00588028			0
1.17		0			0.00296877
1.18		0			0.00593754
1.19		0.0117606			0
1.2		0			0
1.21		0.0117606			0.00296877
1.22		0.0176408			0
1.23		0			0
1.24		0			0
1.25		0			0
1.26		0			0.00296877
1.27		0
1.28		0
1.29		0
1.3		0.00588028
