# Supplementary material for: Membrane-mediated dimerization potentiates PIP5K lipid kinase activity
Source: eLife. 2022 Aug 17;11:e73747. doi: 10.7554/eLife.73747 (PMC9470164; doi:10.7554/eLife.73747)
Supplement: Figure 2—figure supplement 1—source data 1. [file elife-73747-fig2-figsupp1-data1.xlsx]

## Sheet: Figure 2 - Fig Supp 1
Figure 2 - figure supplement 1
Raw Ax647-5KB fluorescence intensity				Normalized Ax647-5KB fluorescence intensity
time (sec)	Ax647 intensity (–OSS)	Ax647 intensity (+OSS)		time (sec)	Ax647 intensity (–OSS)	Ax647 intensity (+OSS)
0	9584.36	6168.23		0	1	1
0.022	9217.6	6110.95		0.022	0.960467	0.990229
0.044	8898.26	6081.5		0.044	0.926045	0.985204
0.066	8689.13	6048.03		0.066	0.903503	0.979494
0.088	8417.31	6017.91		0.088	0.874203	0.974354
0.11	8159.28	5989.18		0.11	0.84639	0.969453
0.132	7912.79	5984.33		0.132	0.819821	0.968625
0.154	7663.99	6003.78		0.154	0.793003	0.971943
0.176	7482.86	6004.7		0.176	0.773479	0.9721
0.198	7297.61	5989.55		0.198	0.753512	0.969516
0.22	7116.38	5959.96		0.22	0.733976	0.964467
0.242	6903.84	5936.8		0.242	0.711067	0.960515
0.264	6756.64	5930.83		0.264	0.695201	0.959497
0.286	6592.17	5943		0.286	0.677472	0.961573
0.308	6434.51	5881.78		0.308	0.660477	0.951128
0.33	6244.77	5909.32		0.33	0.640025	0.955827
0.352	6086.36	5902.26		0.352	0.62295	0.954622
0.374	5924.11	5865.29		0.374	0.605462	0.948316
0.396	5801.03	5853.02		0.396	0.592195	0.946222
0.418	5658.44	5813.4		0.418	0.576825	0.939463
0.44	5531.6	5843.81		0.44	0.563154	0.944651
0.462	5380.4	5847.26		0.462	0.546856	0.945238
0.484	5260.69	5796.01		0.484	0.533951	0.936495
0.506	5130.65	5816.84		0.506	0.519935	0.940049
0.528	5003.82	5822.84		0.528	0.506264	0.941073
0.55	4887.1	5796.98		0.55	0.493683	0.936661
0.572	4839.03	5769.68		0.572	0.488502	0.932002
0.594	4707.38	5759.28		0.594	0.474311	0.930229
0.616	4612.72	5786.35		0.616	0.464108	0.934847
0.638	4470.28	5746.58		0.638	0.448753	0.928061
0.66	4380.51	5751.41		0.66	0.439078	0.928886
0.682	4272.28	5778.81		0.682	0.427411	0.93356
0.704	4176.1	5761.91		0.704	0.417044	0.930677
0.726	4072.67	5762.68		0.726	0.405895	0.930809
0.748	4021.8	5735.47		0.748	0.400412	0.926166
0.77	3901.58	5721.52		0.77	0.387454	0.923787
0.792	3801.62	5742.19		0.792	0.37668	0.927312
0.814	3699.61	5748.35		0.814	0.365684	0.928364
0.836	3613.41	5721.54		0.836	0.356392	0.92379
0.858	3532.01	5670.29		0.858	0.347618	0.915046
0.88	3446.91	5658.95		0.88	0.338444	0.913111
0.902	3412.77	5697.93		0.902	0.334765	0.919761
0.924	3314.58	5695.1		0.924	0.324181	0.919279
0.946	3266.29	5708.16		0.946	0.318976	0.921507
0.968	3186.71	5706.8		0.968	0.310398	0.921276
0.99	3100.22	5704.12		0.99	0.301075	0.920818
1.012	3033.15	5635.16		1.012	0.293846	0.909053
1.034	2969.75	5664.33		1.034	0.287012	0.914029
1.056	2880.71	5638.78		1.056	0.277415	0.90967
1.078	2819.52	5633.01		1.078	0.270819	0.908685
1.1	2743.63	5612.77		1.1	0.262638	0.905232
1.122	2712.55	5641.89		1.122	0.259288	0.910201
1.144	2623.3	5608.26		1.144	0.249668	0.904463
1.166	2609.73	5601.2		1.166	0.248205	0.903258
1.188	2545.62	5606.52		1.188	0.241295	0.904166
1.21	2500.29	5624.38		1.21	0.236409	0.907213
1.232	2413.23	5598.77		1.232	0.227025	0.902844
1.254	2376.2	5553.65		1.254	0.223033	0.895146
1.276	2333.41	5547.14		1.276	0.218421	0.894035
1.298	2278.64	5548.58		1.298	0.212518	0.89428
1.32	2231.5	5546.07		1.32	0.207436	0.893852
1.342	2186.83	5555.86		1.342	0.202622	0.895522
1.364	2148.55	5546.26		1.364	0.198496	0.893884
1.386	2098.18	5528.44		1.386	0.193066	0.890844
1.408	2068.97	5491.7		1.408	0.189917	0.884576
1.43	2010.05	5498.91		1.43	0.183567	0.885806
1.452	1979.89	5479.3		1.452	0.180315	0.88246
1.474	1962.78	5515.74		1.474	0.17847	0.888677
1.496	1912.48	5477.2		1.496	0.17305	0.882102
1.518	1865.99	5480.38		1.518	0.168038	0.882644
1.54	1806.32	5444.37		1.54	0.161606	0.876501
1.562	1758.3	5464.62		1.562	0.15643	0.879955
1.584	1724.3	5457.68		1.584	0.152766	0.878772
1.606	1687.33	5442.03		1.606	0.14878	0.876102
1.628	1670.6	5501.55		1.628	0.146977	0.886256
1.65	1661.37	5453.66		1.65	0.145982	0.878086
1.672	1607.82	5430.62		1.672	0.14021	0.874154
1.694	1582.07	5432.49		1.694	0.137434	0.874474
1.716	1546.54	5462.27		1.716	0.133604	0.879555
1.738	1507.22	5421.15		1.738	0.129366	0.872539
1.76	1468.68	5436.53		1.76	0.125212	0.875163
1.782	1450.72	5432.29		1.782	0.123276	0.87444
1.804	1430.43	5421.25		1.804	0.121089	0.872556
1.826	1400.38	5390.85		1.826	0.11785	0.86737
1.848	1382.94	5421.59		1.848	0.11597	0.872615
1.87	1370.92	5410.48		1.87	0.114674	0.870718
1.892	1358.25	5384.78		1.892	0.113308	0.866334
1.914	1317.77	5400.32		1.914	0.108945	0.868985
1.936	1285.51	5409.65		1.936	0.105469	0.870577
1.958	1277.85	5411.73		1.958	0.104643	0.870931
1.98	1264.1	5370.6		1.98	0.103161	0.863915
2.002	1223.95	5403.14		2.002	0.098833	0.869467
2.024	1205.84	5401.74		2.024	0.0968807	0.869229
2.046	1192.05	5405.95		2.046	0.0953937	0.869946
2.068	1158.05	5384.85		2.068	0.0917294	0.866346
2.09	1160.8	5391.66		2.09	0.0920261	0.867509
2.112	1132.69	5347.9		2.112	0.0889954	0.860043
2.134	1134.33	5344.94		2.134	0.089172	0.859537
2.156	1112.33	5321.25		2.156	0.0868012	0.855495
2.178	1099.32	5360.09		2.178	0.0853983	0.862122
2.2	1064.8	5353.83		2.2	0.0816776	0.861054
2.222	1061.82	5316.13		2.222	0.0813569	0.854622
2.244	1048.73	5317.19		2.244	0.0799454	0.854803
2.266	1028.14	5317.92		2.266	0.0777259	0.854927
2.288	1013.67	5319.64		2.288	0.0761663	0.85522
2.31	1002.39	5340.21		2.31	0.0749506	0.85873
2.332	976.989	5304.7		2.332	0.0722127	0.852671
2.354	984.512	5308.6		2.354	0.0730236	0.853337
2.376	958.138	5284.28		2.376	0.0701808	0.849188
2.398	953.575	5266.82		2.398	0.0696889	0.846208
2.42	928.828	5241.53		2.42	0.0670214	0.841893
2.442	912.208	5274.77		2.442	0.06523	0.847565
2.464	900.953	5266.14		2.464	0.0640168	0.846093
2.486	868.387	5220.47		2.486	0.0605065	0.838301
2.508	859.344	5250.48		2.508	0.0595318	0.84342
2.53	847.058	5224.78		2.53	0.0582075	0.839036
2.552	815.37	5243.69		2.552	0.0547918	0.842261
2.574	812.733	5230.02		2.574	0.0545076	0.839931
2.596	822.85	5233.24		2.596	0.0555981	0.84048
2.618	808.941	5227.88		2.618	0.0540988	0.839565
2.64	792.959	5279.38		2.64	0.0523761	0.848351
2.662	771.92	5260.13		2.662	0.0501084	0.845068
2.684	765	5231.7		2.684	0.0493625	0.840217
2.706	757.728	5245.36		2.706	0.0485786	0.842548
2.728	736.777	5226.34		2.728	0.0463203	0.839302
2.75	734.378	5230.5		2.75	0.0460617	0.840012
2.772	735.333	5244.34		2.772	0.0461647	0.842373
2.794	717.216	5226.03		2.794	0.0442118	0.83925
2.816	706.395	5224.6		2.816	0.0430454	0.839005
2.838	704.273	5230.38		2.838	0.0428167	0.839991
2.86	690.964	5216.21		2.86	0.0413821	0.837574
2.882	688.286	5214.75		2.882	0.0410935	0.837324
2.904	685.031	5208.59		2.904	0.0407426	0.836275
2.926	682.305	5207.67		2.926	0.0404488	0.836116
2.948	674.607	5207.79		2.948	0.039619	0.836138
2.97	662.639	5171.74		2.97	0.038329	0.829987
2.992	655.655	5196.72		2.992	0.0375762	0.834249
3.014	657.868	5174.1		3.014	0.0378147	0.83039
3.036	648.521	5185.53		3.036	0.0368072	0.83234
3.058	645.555	5185.54		3.058	0.0364875	0.832341
3.08	623.319	5160.02		3.08	0.0340907	0.827987
3.102	616.146	5100.93		3.102	0.0333175	0.817905
3.124	610.178	5151.24		3.124	0.0326742	0.82649
3.146	612.801	5145.14		3.146	0.0329569	0.825449
3.168	605.687	5153.46		3.168	0.0321901	0.826868
3.19	598.617	5113.71		3.19	0.0314281	0.820086
3.212	597.545	5120.91		3.212	0.0313125	0.821315
3.234	599.888	5171.9		3.234	0.0315651	0.830014
3.256	582.645	5182.82		3.256	0.0297064	0.831876
3.278	585.635	5172.79		3.278	0.0300287	0.830166
3.3	582.326	5108.03		3.3	0.0296721	0.819116
3.322	581.678	5128.47		3.322	0.0296022	0.822605
3.344	567.792	5107.62		3.344	0.0281054	0.819047
3.366	571.76	5096.72		3.366	0.0285331	0.817188
3.388	560.538	5137.23		3.388	0.0273235	0.824099
3.41	555.065	5091.55		3.41	0.0267336	0.816306
3.432	554.46	5122.67		3.432	0.0266684	0.821614
3.454	563.869	5085.17		3.454	0.0276826	0.815216
3.476	550.373	5092.86		3.476	0.0262278	0.816528
3.498	537.485	5062.9		3.498	0.0248387	0.811416
3.52	538.722	5069.04		3.52	0.024972	0.812465
3.542	550.157	5092.18		3.542	0.0262046	0.816412
3.564	540.658	5053.19		3.564	0.0251807	0.80976
3.586	538.427	5103.91		3.586	0.0249402	0.818414
3.608	534.984	5077.77		3.608	0.0245691	0.813955
3.63	528.027	5065.7		3.63	0.0238192	0.811896
3.652	530.912	5081.08		3.652	0.0241301	0.814519
3.674	521.061	5097.79		3.674	0.0230683	0.81737
3.696	520.824	5046		3.696	0.0230428	0.808533
3.718	517.957	5034.46		3.718	0.0227337	0.806564
3.74	510.122	5028.93		3.74	0.0218892	0.805621
3.762	506.372	5039.37		3.762	0.021485	0.807403
3.784	504.046	5048.27		3.784	0.0212343	0.808921
3.806	494.414	5041.63		3.806	0.020196	0.807789
3.828	490.71	5047.88		3.828	0.0197968	0.808855
3.85	492.893	5032.25		3.85	0.0200321	0.806188
3.872	488.906	5017.55		3.872	0.0196023	0.80368
3.894	498.281	5016.98		3.894	0.0206129	0.803584
3.916	487.191	5030.46		3.916	0.0194175	0.805883
3.938	484.753	5023.42		3.938	0.0191547	0.804682
3.96	480.202	5020.3		3.96	0.0186641	0.80415
3.982	474.351	4993.4		3.982	0.0180335	0.79956
4.004	470.573	4991.13		4.004	0.0176262	0.799173
4.026	469.22	4975.24		4.026	0.0174804	0.796461
4.048	463.972	5000.46		4.048	0.0169147	0.800764
4.07	463.24	4973.39		4.07	0.0168358	0.796145
4.092	467.98	4971.65		4.092	0.0173467	0.795849
4.114	465.031	4985.71		4.114	0.0170288	0.798247
4.136	456.158	4941.06		4.136	0.0160724	0.79063
4.158	455.735	4973.3		4.158	0.0160268	0.79613
4.18	455.4	4992.29		4.18	0.0159907	0.799371
4.202	451.364	4992.61		4.202	0.0155557	0.799424
4.224	446.549	4937.21		4.224	0.0150367	0.789972
4.246	448.161	4935.35		4.246	0.0152104	0.789655
4.268	443.782	4950.8		4.268	0.0147384	0.792292
4.29	436.58	4963.9		4.29	0.0139621	0.794527
4.312	438.924	4947.52		4.312	0.0142148	0.791732
4.334	437.125	4939.74		4.334	0.0140209	0.790405
4.356	430.834	4930.11		4.356	0.0133428	0.788762
4.378	434.844	4936.48		4.378	0.013775	0.789849
4.4	432.183	4914.32		4.4	0.0134882	0.786067
4.422	423.47	4886.8		4.422	0.012549	0.781372
4.444	425.355	4905.1		4.444	0.0127522	0.784494
4.466	418.722	4891.27		4.466	0.0120372	0.782135
4.488	423.289	4897.83		4.488	0.0125295	0.783254
4.51	419.45	4887.87		4.51	0.0121157	0.781555
4.532	421.772	4890.13		4.532	0.012366	0.781941
4.554	425.288	4867.35		4.554	0.012745	0.778055
4.576	421.977	4858.83		4.576	0.0123881	0.7766
4.598	420.058	4841.14		4.598	0.0121812	0.773581
4.62	418.102	4845.76		4.62	0.0119704	0.77437
4.642	417.755	4860.67		4.642	0.011933	0.776915
4.664	415.887	4862.87		4.664	0.0117316	0.77729
4.686	410.92	4831.37		4.686	0.0111962	0.771916
4.708	411	4825.42		4.708	0.0112049	0.770899
4.73	408.419	4834.34		4.73	0.0109267	0.772422
4.752	413.436	4822.87		4.752	0.0114674	0.770465
4.774	406.662	4831.31		4.774	0.0107373	0.771906
4.796	411.639	4822.06		4.796	0.0112737	0.770327
4.818	411.095	4809.9		4.818	0.0112151	0.768252
4.84	407.265	4825.01		4.84	0.0108023	0.770829
4.862	406.002	4826.56		4.862	0.0106661	0.771095
4.884	407.674	4813.3		4.884	0.0108463	0.768833
4.906	406.402	4784.9		4.906	0.0107092	0.763988
4.928	407.602	4790		4.928	0.0108386	0.764857
4.95	403.347	4798.27		4.95	0.0103799	0.766268
4.972	396.854	4803.42		4.972	0.00968006	0.767146
4.994	398.228	4823.3		4.994	0.00982817	0.770539
5.016	399.536	4792.29		5.016	0.00996916	0.765247
5.038	394.426	4786.81		5.038	0.00941835	0.764314
5.06	391.308	4815.14		5.06	0.00908226	0.769146
5.082	389.357	4797.45		5.082	0.00887196	0.766128
5.104	392.46	4779.52		5.104	0.00920644	0.76307
5.126	395.264	4772.5		5.126	0.00950868	0.761871
5.148	383.757	4749.59		5.148	0.00826834	0.757963
5.17	384.697	4775.67		5.17	0.00836966	0.762412
5.192	386.834	4752.74		5.192	0.00860001	0.7585
5.214	384.517	4721.25		5.214	0.00835026	0.753127
5.236	385.163	4728.3		5.236	0.00841989	0.75433
5.258	391.008	4722.62		5.258	0.00904992	0.753361
5.28	388.281	4747.8		5.28	0.00875598	0.757657
5.302	385.874	4744.47		5.302	0.00849653	0.757089
5.324	385.469	4745.71		5.324	0.00845288	0.757301
5.346	386.352	4758.39		5.346	0.00854806	0.759464
5.368	379.76	4698.04		5.368	0.0078375	0.749168
5.39	374.328	4692		5.39	0.00725199	0.748138
5.412	376.908	4697.78		5.412	0.00753009	0.749123
5.434	372.217	4715.02		5.434	0.00702445	0.752065
5.456	373.961	4685.31		5.456	0.00721243	0.746996
5.478	377.629	4679.81		5.478	0.0076078	0.746057
5.5	375.534	4697.56		5.5	0.00738198	0.749085
5.522	380.813	4669.06		5.522	0.00795101	0.744223
5.544	375.029	4685.94		5.544	0.00732755	0.747103
5.566	376.804	4678.1		5.566	0.00751888	0.745765
5.588	379.353	4676.13		5.588	0.00779363	0.745429
5.61	374.562	4656.41		5.61	0.00727721	0.742066
5.632	366.248	4674.27		5.632	0.00638105	0.745112
5.654	374.789	4646.86		5.654	0.00730168	0.740436
5.676	370.07	4696.09		5.676	0.00679302	0.748835
5.698	372.453	4685.76		5.698	0.00704988	0.747072
5.72	371.318	4668.9		5.72	0.00692754	0.744195
5.742	371.818	4684.41		5.742	0.00698144	0.746841
5.764	368.899	4668.06		5.764	0.0066668	0.744053
5.786	367.187	4651.15		5.786	0.00648226	0.741168
5.808	361.256	4659.74		5.808	0.00584296	0.742633
5.83	364.037	4635.9		5.83	0.00614273	0.738566
5.852	367.696	4696.81		5.852	0.00653713	0.748957
5.874	363.078	4692.81		5.874	0.00603936	0.748276
5.896	369.105	4696.91		5.896	0.006689	0.748975
5.918	368.852	4690.28		5.918	0.00666173	0.747843
5.94	371.292	4690.38		5.94	0.00692474	0.74786
5.962	371.85	4665.91		5.962	0.00698489	0.743685
5.984	369.858	4695.77		5.984	0.00677017	0.74878
6.006	366.833	4690.52		6.006	0.00644411	0.747884
6.028	370.261	4653.81		6.028	0.00681361	0.741621
6.05	370.835	4662.61		6.05	0.00687548	0.743123
6.072	366.684	4669.92		6.072	0.00642805	0.744369
6.094	360.961	4670.34		6.094	0.00581116	0.744442
6.116	367.932	4639.88		6.116	0.00656257	0.739244
6.138	362.476	4629.9		6.138	0.00597447	0.737542
6.16	363.15	4632.81		6.16	0.00604712	0.738038
6.182	363.003	4640.58		6.182	0.00603127	0.739364
6.204	362.8	4661.45		6.204	0.00600939	0.742926
6.226	365.498	4652.2		6.226	0.00630021	0.741346
6.248	365.32	4646.57		6.248	0.00628102	0.740385
6.27	360.019	4649.77		6.27	0.00570963	0.740932
6.292	358.635	4624.33		6.292	0.00556045	0.736592
6.314	358.28	4600.17		6.314	0.00552218	0.73247
6.336	360.298	4592.26		6.336	0.0057397	0.731121
6.358	359.912	4610.32		6.358	0.00569809	0.734202
6.38	361.487	4642.87		6.38	0.00586786	0.739755
6.402	359.253	4634.78		6.402	0.00562706	0.738374
6.424	355.762	4635.16		6.424	0.00525076	0.73844
6.446	348.414	4651.61		6.446	0.00445873	0.741246
6.468	349.819	4593.12		6.468	0.00461017	0.731266
6.49	352.091	4589.98		6.49	0.00485507	0.730731
6.512	349.887	4588.91		6.512	0.0046175	0.730549
6.534	349.168	4588.91		6.534	0.00454	0.730549
6.556	348.334	4586.36		6.556	0.0044501	0.730113
6.578	345.946	4612.54		6.578	0.0041927	0.73458
6.6	348.943	4598.35		6.6	0.00451575	0.732159
6.622	348.306	4598.79		6.622	0.00444708	0.732235
6.644	353.032	4587.14		6.644	0.0049565	0.730247
6.666	350.431	4570.97		6.666	0.00467614	0.727487
6.688	349.882	4572.02		6.688	0.00461696	0.727666
6.71	350.655	4588.23		6.71	0.00470028	0.730432
6.732	351.019	4558.06		6.732	0.00473952	0.725285
6.754	354.218	4564.34		6.754	0.00508434	0.726357
6.776	351.228	4543.85		6.776	0.00476205	0.72286
6.798	348.544	4568.05		6.798	0.00447274	0.726989
6.82	347.49	4545.97		6.82	0.00435913	0.723223
6.842	347.769	4547.65		6.842	0.0043892	0.723509
6.864	351.487	4546.72		6.864	0.00478996	0.723351
6.886	348.433	4531.15		6.886	0.00446077	0.720693
6.908	355.623	4542.09		6.908	0.00523578	0.722561
6.93	350.396	4506.52		6.93	0.00467236	0.716492
6.952	352.897	4520.9		6.952	0.00494195	0.718944
6.974	347.494	4519.85		6.974	0.00435956	0.718767
6.996	341.339	4521.93		6.996	0.00369611	0.719121
7.018	345.078	4531.38		7.018	0.00409914	0.720733
7.04	349.411	4503.11		7.04	0.00456619	0.71591
7.062	350.767	4521.13		7.062	0.00471235	0.718985
7.084	346.138	4494.45		7.084	0.0042134	0.714433
7.106	349.171	4495.09		7.106	0.00454032	0.714541
7.128	342.039	4522.87		7.128	0.00377157	0.719282
7.15	347.272	4479.15		7.15	0.00433563	0.711822
7.172	342.064	4475.98		7.172	0.00377426	0.711281
7.194	346.125	4469.1		7.194	0.00421199	0.710107
7.216	339.466	4513.8		7.216	0.00349422	0.717733
7.238	343.107	4486.8		7.238	0.00388668	0.713127
7.26	336.475	4470.52		7.26	0.00317182	0.710349
7.282	340.92	4479.28		7.282	0.00365095	0.711844
7.304	345.115	4498.23		7.304	0.00410313	0.715077
7.326	342.057	4480.91		7.326	0.00377351	0.712122
7.348	342.313	4448.15		7.348	0.0038011	0.706533
7.37	344.354	4505.45		7.37	0.0040211	0.71631
7.392	340.953	4492.48		7.392	0.00365451	0.714097
7.414	346.593	4521.02		7.414	0.00426244	0.718966
7.436	341.783	4499.08		7.436	0.00374397	0.715222
7.458	345.136	4490.53		7.458	0.00410539	0.713763
7.48	344.492	4487.84		7.48	0.00403597	0.713305
7.502	344.26	4478.99		7.502	0.00401097	0.711795
7.524	342.584	4467.09		7.524	0.00383031	0.709764
7.546	341.015	4488.93		7.546	0.00366119	0.713491
7.568	335.908	4469.77		7.568	0.00311071	0.710222
7.59	343.597	4477.86		7.59	0.0039395	0.711601
7.612	345.389	4475.45		7.612	0.00413266	0.71119
7.634	341.469	4456.74		7.634	0.00371013	0.707999
7.656	347.752	4444.91		7.656	0.00438737	0.70598
7.678	342.775	4439.42		7.678	0.0038509	0.705043
7.7	337.698	4428.06		7.7	0.00330365	0.703106
7.722	338.745	4423.24		7.722	0.00341651	0.702283
7.744	340.716	4434.05		7.744	0.00362896	0.704128
7.766	335.82	4416.53		7.766	0.00310122	0.701139
7.788	344.018	4440.12		7.788	0.00398488	0.705163
7.81	338.312	4402.15		7.81	0.00336983	0.698685
7.832	333.874	4396.64		7.832	0.00289146	0.697745
7.854	336.185	4414.89		7.854	0.00314056	0.700858
7.876	336.7	4406.82		7.876	0.00319608	0.699482
7.898	331.076	4410.23		7.898	0.00258987	0.700063
7.92	332.767	4423.83		7.92	0.00277214	0.702384
7.942	339.366	4408.22		7.942	0.00348344	0.69972
7.964	330.603	4403.57		7.964	0.00253888	0.698927
7.986	331.697	4394.27		7.986	0.0026568	0.69734
8.008	338.361	4407.68		8.008	0.00337511	0.699629
8.03	336.607	4412.19		8.03	0.00318605	0.700399
8.052	334.455	4414.98		8.052	0.00295409	0.700873
8.074	340.383	4396.82		8.074	0.00359307	0.697775
8.096	339.368	4389.4		8.096	0.00348366	0.69651
8.118	339.198	4389.47		8.118	0.00346533	0.696522
8.14	338.434	4403.71		8.14	0.00338298	0.698951
8.162	338.611	4390.82		8.162	0.00340206	0.696752
8.184	341.62	4409.96		8.184	0.0037264	0.700017
8.206	342.698	4390.69		8.206	0.0038426	0.69673
8.228	339.936	4332.58		8.228	0.00354488	0.686816
8.25	337.898	4381.67		8.25	0.00332521	0.695191
8.272	340.59	4397.02		8.272	0.00361538	0.697809
8.294	334.993	4404.68		8.294	0.00301208	0.699116
8.316	339.464	4384		8.316	0.00349401	0.695588
8.338	339.14	4385.51		8.338	0.00345908	0.695846
8.36	340.648	4383.84		8.36	0.00362163	0.695561
8.382	341.742	4366.85		8.382	0.00373955	0.692663
8.404	338.642	4376.49		8.404	0.0034054	0.694306
8.426	344.519	4391.5		8.426	0.00403888	0.696868
8.448	340.885	4351.8		8.448	0.00364718	0.690094
8.47	338.305	4355.48		8.47	0.00336908	0.690722
8.492	339.702	4370.38		8.492	0.00351966	0.693265
8.514	336.932	4338.49		8.514	0.00322108	0.687825
8.536	342.085	4381.09		8.536	0.00377652	0.695092
8.558	339.911	4349.5		8.558	0.00354219	0.689702
8.58	337.314	4349.5		8.58	0.00326226	0.689703
8.602	341.366	4350.01		8.602	0.00369902	0.689788
8.624	341.089	4311.2		8.624	0.00366917	0.683167
8.646	340.047	4348.26		8.646	0.00355685	0.689491
8.668	336.037	4332.8		8.668	0.00312461	0.686853
8.69	339.335	4339.12		8.69	0.0034801	0.687932
8.712	335.831	4325.94		8.712	0.00310241	0.685683
8.734	340.626	4323.61		8.734	0.00361926	0.685285
8.756	336.246	4324.89		8.756	0.00314714	0.685504
8.778	337.928	4330.3		8.778	0.00332844	0.686427
8.8	340.301	4309.45		8.8	0.00358423	0.68287
8.822	337.418	4320.67		8.822	0.00327347	0.684783
8.844	332.713	4341.57		8.844	0.00276632	0.68835
8.866	335.288	4325.77		8.866	0.00304388	0.685653
8.888	336.39	4328.53		8.888	0.00316266	0.686125
8.91	336.289	4300		8.91	0.00315177	0.681256
8.932	335.687	4300.29		8.932	0.00308688	0.681307
8.954	331.941	4321.4		8.954	0.0026831	0.684908
8.976	335.463	4284.15		8.976	0.00306274	0.678553
8.998	339.429	4298.07		8.998	0.00349023	0.680927
9.02	335.125	4280.02		9.02	0.00302631	0.677849
9.042	336.328	4295.51		9.042	0.00315598	0.680491
9.064	333.518	4294.32		9.064	0.00285309	0.680288
9.086	338.593	4290.95		9.086	0.00340012	0.679713
9.108	338.368	4299.44		9.108	0.00337587	0.681161
9.13	336.32	4291.24		9.13	0.00315512	0.679763
9.152	339.886	4290.27		9.152	0.00353949	0.679598
9.174	341.359	4248.4		9.174	0.00369827	0.672453
9.196	337.237	4270.44		9.196	0.00325396	0.676213
9.218	335.513	4263.15		9.218	0.00306813	0.674969
9.24	337.763	4281.56		9.24	0.00331066	0.678111
9.262	332.694	4270.25		9.262	0.00276427	0.676181
9.284	333.543	4256.11		9.284	0.00285578	0.673769
9.306	334.829	4259.95		9.306	0.0029944	0.674424
9.328	328.832	4276.79		9.328	0.00234799	0.677297
9.35	334.462	4249.42		9.35	0.00295484	0.672627
9.372	330.377	4238.74		9.372	0.00251452	0.670804
9.394	333.891	4262.04		9.394	0.00289329	0.67478
9.416	332.504	4218.02		9.416	0.00274379	0.66727
9.438	333.949	4264.76		9.438	0.00289955	0.675244
9.46	332.386	4249.17		9.46	0.00273107	0.672584
9.482	334.85	4245.95		9.482	0.00299666	0.672036
9.504	333.284	4209.69		9.504	0.00282787	0.665848
9.526	334.155	4255.07		9.526	0.00292175	0.673591
9.548	334.881	4244.63		9.548	0.00300001	0.67181
9.57	333.528	4240.68		9.57	0.00285417	0.671135
9.592	333.979	4224.06		9.592	0.00290278	0.6683
9.614	333.736	4217.27		9.614	0.00287659	0.667142
9.636	328.717	4197.95		9.636	0.00233559	0.663846
9.658	329.792	4233.08		9.658	0.00245146	0.66984
9.68	330.675	4233.61		9.68	0.00254664	0.669929
9.702	333.117	4241.12		9.702	0.00280986	0.671212
9.724	332.19	4224.23		9.724	0.00270994	0.668329
9.746	331.137	4251.11		9.746	0.00259644	0.672916
9.768	333.395	4223.09		9.768	0.00283983	0.668135
9.79	332.499	4212.28		9.79	0.00274325	0.666291
9.812	329.374	4224.14		9.812	0.00240641	0.668313
9.834	332.232	4218.27		9.834	0.00271447	0.667313
9.856	334.063	4218.19		9.856	0.00291183	0.667298
9.878	337.132	4207.11		9.878	0.00324264	0.665409
9.9	339.474	4243.61		9.9	0.00349508	0.671635
9.922	330.477	4207.74		9.922	0.0025253	0.665516
9.944	331.049	4198.77		9.944	0.00258696	0.663985
9.966	330.507	4185.57		9.966	0.00252853	0.661733
9.988	332.521	4163.54		9.988	0.00274562	0.657975
10.01	336.993	4185.88		10.01	0.00322766	0.661787
10.032	331.674	4168.26		10.032	0.00265432	0.65878
10.054	332.272	4172.23		10.054	0.00271878	0.659458
10.076	330.369	4170.85		10.076	0.00251366	0.659221
10.098	334.256	4162.04		10.098	0.00293264	0.65772
10.12	332.145	4138.83		10.12	0.00270509	0.65376
10.142	332.984	4141		10.142	0.00279553	0.65413
10.164	333.907	4155.87		10.164	0.00289502	0.656666
10.186	333.158	4159.77		10.186	0.00281428	0.657331
10.208	335.17	4180.78		10.208	0.00303116	0.660916
10.23	336.945	4174.9		10.23	0.00322248	0.659914
10.252	329.907	4174.8		10.252	0.00246386	0.659895
10.274	332.862	4180.86		10.274	0.00278238	0.66093
10.296	333.47	4165.17		10.296	0.00284791	0.658252
10.318	334.007	4160.52		10.318	0.0029058	0.657459
10.34	333.828	4180.01		10.34	0.0028865	0.660784
10.362	333.901	4185.2		10.362	0.00289437	0.66167
10.384	333.605	4186.81		10.384	0.00286247	0.661946
10.406	331.779	4133.81		10.406	0.00266564	0.652903
10.428	334.427	4153.25		10.428	0.00295107	0.656219
10.45	331.942	4134.89		10.45	0.00268321	0.653086
10.472	331.477	4139.62		10.472	0.00263309	0.653894
10.494	329.016	4151.29		10.494	0.00236782	0.655885
10.516	332.061	4145.42		10.516	0.00269604	0.654884
10.538	331.874	4148.54		10.538	0.00267588	0.655416
10.56	328.445	4131.88		10.56	0.00230627	0.652573
10.582	332.651	4130.81		10.582	0.00275963	0.652391
10.604	328.556	4149.86		10.604	0.00231824	0.655641
10.626	329.298	4130.29		10.626	0.00239822	0.652302
10.648	330.728	4138.6		10.648	0.00255235	0.653721
10.67	335.316	4128.96		10.67	0.00304689	0.652076
10.692	327.732	4140.97		10.692	0.00222942	0.654123
10.714	331.793	4117.84		10.714	0.00266715	0.650178
10.736	332.956	4113.38		10.736	0.00279251	0.649416
10.758	331.502	4142.87		10.758	0.00263578	0.654449
10.78	332.193	4159.16		10.78	0.00271027	0.657227
10.802	331.33	4138.23		10.802	0.00261724	0.653657
10.824	334.25	4128.99		10.824	0.00293199	0.65208
10.846	329.893	4113.19		10.846	0.00246235	0.649385
10.868	327.526	4131.73		10.868	0.00220721	0.652548
10.89	334.198	4101.67		10.89	0.00292639	0.647419
10.912	335.9	4118.64		10.912	0.00310984	0.650314
10.934	329.036	4100.72		10.934	0.00236997	0.647257
10.956	326.376	4099.76		10.956	0.00208325	0.647094
10.978	328.587	4119.83		10.978	0.00232158	0.650517
11	329.754	4099.76		11	0.00244737	0.647093
11.022	330.984	4083.08		11.022	0.00257995	0.644248
11.044	331.71	4105.12		11.044	0.0026582	0.648008
11.066	332.969	4107		11.066	0.00279391	0.648329
11.088	331.755	4087.47		11.088	0.00266305	0.644996
11.11	332.981	4064.25		11.11	0.00279521	0.641034
11.132	332.735	4073.6		11.132	0.00276869	0.64263
11.154	335.648	4071.91		11.154	0.00308268	0.642342
11.176	336.034	4079.15		11.176	0.00312429	0.643578
11.198	336.717	4091.31		11.198	0.00319791	0.645651
11.22	337.575	4079.73		11.22	0.00329039	0.643675
11.242	331.674	4090.37		11.242	0.00265432	0.645491
11.264	333.418	4098.78		11.264	0.00284231	0.646925
11.286	331.787	4081.37		11.286	0.0026665	0.643956
11.308	331.242	4054.9		11.308	0.00260776	0.639439
11.33	329.672	4060.51		11.33	0.00243853	0.640396
11.352	329.283	4049.95		11.352	0.0023966	0.638595
11.374	329.15	4052.31		11.374	0.00238226	0.638998
11.396	327.28	4035.89		11.396	0.0021807	0.636197
11.418	335.519	4021.91		11.418	0.00306878	0.633811
11.44	330.754	4048.72		11.44	0.00255516	0.638385
11.462	332.364	4061.61		11.462	0.0027287	0.640585
11.484	327.395	4059.76		11.484	0.00219309	0.640268
11.506	324.145	4016.61		11.506	0.00184277	0.632907
11.528	327.415	4038.34		11.528	0.00219525	0.636614
11.55	326.102	4072.17		11.55	0.00205372	0.642386
11.572	330.235	4044.16		11.572	0.00249921	0.637608
11.594	328.796	4026.41		11.594	0.0023441	0.634579
11.616	328.274	4027.95		11.616	0.00228784	0.634842
11.638	328.919	4027.06		11.638	0.00235736	0.634689
11.66	329.574	4002.69		11.66	0.00242797	0.630532
11.682	325.271	4012.43		11.682	0.00196415	0.632195
11.704	325.391	4042.72		11.704	0.00197708	0.637362
11.726	324.373	4053.32		11.726	0.00186735	0.63917
11.748	327.714	4048.91		11.748	0.00222748	0.638418
11.77	322.346	4007.98		11.77	0.00164886	0.631434
11.792	321.735	4021.72		11.792	0.001583	0.633778
11.814	325	4022.82		11.814	0.00193493	0.633967
11.836	328.06	4030.93		11.836	0.00226477	0.63535
11.858	324.543	4021.73		11.858	0.00188567	0.63378
11.88	329.342	4031.53		11.88	0.00240296	0.635453
11.902	327.343	4019.63		11.902	0.00218749	0.633422
11.924	323.863	4018.79		11.924	0.00181238	0.633279
11.946	321.548	4030.96		11.946	0.00156284	0.635354
11.968	325.84	4010.88		11.968	0.00202548	0.63193
11.99	325.552	4008.34		11.99	0.00199443	0.631497
12.012	328.649	4004.59		12.012	0.00232826	0.630857
12.034	326.532	4005.95		12.034	0.00210007	0.631088
12.056	325.658	3983.39		12.056	0.00200586	0.627239
12.078	325.403	3994.73		12.078	0.00197837	0.629173
12.1	324.661	4040.06		12.1	0.00189839	0.636907
12.122	324.711	3998.16		12.122	0.00190378	0.629759
12.144	323.65	3971.9		12.144	0.00178942	0.625278
12.166	321.476	3950.71		12.166	0.00155508	0.621664
12.188	324.623	3978.65		12.188	0.0018943	0.62643
12.21	323.525	3952.43		12.21	0.00177594	0.621957
12.232	323.008	3969.48		12.232	0.00172022	0.624866
12.254	326.231	3948.68		12.254	0.00206762	0.621318
12.276	324.866	3957.12		12.276	0.00192049	0.622756
12.298	327.84	3938.07		12.298	0.00224106	0.619507
12.32	327.882	3945.33		12.32	0.00224559	0.620745
12.342	327.024	3958.29		12.342	0.0021531	0.622956
12.364	326.956	3964.2		12.364	0.00214577	0.623966
12.386	326.137	3958.98		12.386	0.00205749	0.623074
12.408	328.512	3975.51		12.408	0.00231349	0.625894
12.43	323.347	3948.34		12.43	0.00175676	0.621259
12.452	325.178	3954.22		12.452	0.00195412	0.622262
12.474	324.285	3966.07		12.474	0.00185787	0.624284
12.496	324.73	3952.05		12.496	0.00190583	0.621892
12.518	323.973	3951.55		12.518	0.00182423	0.621807
12.54	325.282	3940.88		12.54	0.00196533	0.619987
12.562	323.442	3943.27		12.562	0.001767	0.620394
12.584	325.424	3983.01		12.584	0.00198064	0.627173
12.606	323.026	3965.76		12.606	0.00172216	0.62423
12.628	322.445	3937.05		12.628	0.00165953	0.619333
12.65	326.488	3941.46		12.65	0.00209533	0.620085
12.672	331.657	3943.97		12.672	0.00265249	0.620513
12.694	322.959	3947.31		12.694	0.00171494	0.621083
12.716	324.446	3917.51		12.716	0.00187522	0.616
12.738	329.427	3903.52		12.738	0.00241212	0.613612
12.76	323.837	3945.22		12.76	0.00180958	0.620727
12.782	321.655	3921.38		12.782	0.00157438	0.616659
12.804	327.046	3939.25		12.804	0.00215547	0.619709
12.826	323.839	3914.43		12.826	0.00180979	0.615474
12.848	327.023	3898.63		12.848	0.00215299	0.612778
12.87	323.921	3903.42		12.87	0.00181863	0.613595
12.892	328.712	3925.74		12.892	0.00233505	0.617404
12.914	326.944	3935.66		12.914	0.00214448	0.619097
12.936	328.375	3921.45		12.936	0.00229873	0.616672
12.958	326.268	3910.66		12.958	0.00207161	0.61483
12.98	327.857	3920.22		12.98	0.00224289	0.616462
13.002	329.724	3935.24		13.002	0.00244413	0.619024
13.024	328.018	3910.75		13.024	0.00226024	0.614845
13.046	327.967	3906.13		13.046	0.00225475	0.614058
13.068	327.827	3891.85		13.068	0.00223966	0.611621
13.09	328.9	3874.16		13.09	0.00235532	0.608604
13.112	331.933	3877.49		13.112	0.00268224	0.609171
13.134	329.242	3877.79		13.134	0.00239218	0.609222
13.156	327.66	3907.87		13.156	0.00222166	0.614355
13.178	328.407	3885.16		13.178	0.00230217	0.61048
13.2	331.017	3907.67		13.2	0.00258351	0.61432
13.222	331.562	3887.72		13.222	0.00264225	0.610916
13.244	332.186	3852.83		13.244	0.00270951	0.604964
13.266	330.487	3826.92		13.266	0.00252638	0.600543
13.288	331.315	3827.64		13.288	0.00261563	0.600665
13.31	332.006	3837.01		13.31	0.00269011	0.602264
13.332	334.537	3821.66		13.332	0.00296293	0.599646
13.354	327.02	3835.53		13.354	0.00215267	0.602012
13.376	330.756	3823.28		13.376	0.00255537	0.599922
13.398	331.263	3842.19		13.398	0.00261002	0.603149
13.42	331.127	3851.15		13.42	0.00259536	0.604678
13.442	332.209	3846.53		13.442	0.00271199	0.603889
13.464	334.009	3855.2		13.464	0.00290601	0.605369
13.486	334.306	3828.57		13.486	0.00293803	0.600825
13.508	333.472	3845.33		13.508	0.00284813	0.603685
13.53	327.876	3809.13		13.53	0.00224494	0.597508
13.552	333.276	3820.91		13.552	0.002827	0.599518
13.574	331.27	3795.68		13.574	0.00261078	0.595214
13.596	329.745	3822.29		13.596	0.0024464	0.599754
13.618	326.845	3850.14		13.618	0.00213381	0.604505
13.64	326.606	3819.63		13.64	0.00210805	0.599299
13.662	323.938	3831.79		13.662	0.00182046	0.601375
13.684	326.572	3827.82		13.684	0.00210438	0.600697
13.706	325.873	3831.27		13.706	0.00202904	0.601286
13.728	331.914	3802.35		13.728	0.00268019	0.596351
13.75	334.191	3809.99		13.75	0.00292563	0.597655
13.772	328.244	3806.25		13.772	0.0022846	0.597016
13.794	329.12	3817.91		13.794	0.00237903	0.599007
13.816	330.656	3800.92		13.816	0.00254459	0.596108
13.838	331.8	3793.59		13.838	0.00266791	0.594857
13.86	333.009	3782.67		13.86	0.00279822	0.592993
13.882	328.583	3777.78		13.882	0.00232115	0.592159
13.904	323.48	3796.36		13.904	0.00177109	0.59533
13.926	326.762	3776.44		13.926	0.00212486	0.59193
13.948	326.377	3789.2		13.948	0.00208336	0.594107
13.97	322.593	3776.74		13.97	0.00167548	0.591982
13.992	324.72	3820.11		13.992	0.00190475	0.599381
14.014	320.408	3818.09		14.014	0.00143996	0.599036
14.036	320.234	3797.3		14.036	0.00142121	0.59549
14.058	322.87	3792.56		14.058	0.00170534	0.594682
14.08	321.61	3791.1		14.08	0.00156953	0.594432
14.102	327.456	3765.35		14.102	0.00219967	0.590038
14.124	329.368	3757.79		14.124	0.00240576	0.588748
14.146	326.193	3761.89		14.146	0.00206353	0.589447
14.168	321.594	3753.13		14.168	0.0015678	0.587953
14.19	322.583	3746.87		14.19	0.00167441	0.586886
14.212	328.194	3729.84		14.212	0.00227922	0.58398
14.234	326.204	3757.42		14.234	0.00206471	0.588686
14.256	323.938	3761.16		14.256	0.00182046	0.589324
14.278	325.785	3761.6		14.278	0.00201955	0.5894
14.3	322.098	3739.02		14.3	0.00162213	0.585547
14.322	320.559	3725.76		14.322	0.00145624	0.583284
14.344	322.606	3730.75		14.344	0.00167689	0.584135
14.366	320.44	3745.55		14.366	0.00144341	0.586661
14.388	322.285	3720.53		14.388	0.00164229	0.582393
14.41	321.072	3730.47		14.41	0.00151154	0.584088
14.432	322.236	3759.57		14.432	0.001637	0.589052
14.454	316.05	3765.46		14.454	0.000970216	0.590058
14.476	314.76	3736.51		14.476	0.000831167	0.585119
14.498	318.959	3731.8		14.498	0.00128378	0.584314
14.52	315.082	3732.58		14.52	0.000865876	0.584448
14.542	320.577	3740.01		14.542	0.00145818	0.585715
14.564	318.754	3756.55		14.564	0.00126168	0.588538
14.586	319.073	3772.11		14.586	0.00129606	0.591193
14.608	316.409	3751.87		14.608	0.00100891	0.587739
14.63	322.048	3726.93		14.63	0.00161674	0.583483
14.652	316.698	3721.26		14.652	0.00104006	0.582516
14.674	319.972	3743.94		14.674	0.00139297	0.586386
14.696	323.089	3733.23		14.696	0.00172895	0.584559
14.718	320.207	3727.7		14.718	0.0014183	0.583615
14.74	322.728	3738.66		14.74	0.00169004	0.585485
14.762	322.185	3723.82		14.762	0.00163151	0.582953
14.784	318.449	3712.11		14.784	0.0012288	0.580955
14.806	321.928	3704.57		14.806	0.0016038	0.579669
14.828	320.116	3701.2		14.828	0.00140849	0.579094
14.85	318.301	3690.61		14.85	0.00121285	0.577288
14.872	317.022	3694.3		14.872	0.00107499	0.577917
14.894	316.03	3703.05		14.894	0.00096806	0.57941
14.916	312.648	3688.38		14.916	0.000603515	0.576906
14.938	313.057	3700.07		14.938	0.000647601	0.5789
14.96	318.742	3706.37		14.96	0.00126039	0.579976
14.982	315.073	3702.49		14.982	0.000864905	0.579314
15.004	316.473	3708.58		15.004	0.00101581	0.580353
15.026	316.644	3705.62		15.026	0.00103424	0.579849
15.048	317.602	3696.94		15.048	0.00113751	0.578367
15.07	318.696	3703.62		15.07	0.00125543	0.579508
15.092	321.876	3692.66		15.092	0.0015982	0.577638
15.114	317.495	3691.75		15.114	0.00112597	0.577481
15.136	319.725	3684.13		15.136	0.00136634	0.576182
15.158	319.89	3701.9		15.158	0.00138413	0.579213
15.18	320.904	3688.31		15.18	0.00149343	0.576895
15.202	323.299	3700.8		15.202	0.00175158	0.579026
15.224	319.503	3671.46		15.224	0.00134241	0.57402
15.246	317.105	3689.24		15.246	0.00108393	0.577053
15.268	318.748	3673.24		15.268	0.00126103	0.574323
15.29	324.224	3661.76		15.29	0.00185129	0.572366
15.312	323.689	3669.88		15.312	0.00179362	0.57375
15.334	323.922	3678.28		15.334	0.00181874	0.575183
15.356	319.326	3666.92		15.356	0.00132334	0.573245
15.378	319.389	3659.44		15.378	0.00133013	0.571969
15.4	323.144	3671.64		15.4	0.00173488	0.57405
15.422	322.351	3674.05		15.422	0.0016494	0.574462
15.444	320.811	3651.24		15.444	0.0014834	0.570571
15.466	319.658	3688.35		15.466	0.00135912	0.576902
15.488	317.707	3693.16		15.488	0.00114882	0.577723
15.51	322.819	3670.29		15.51	0.00169985	0.57382
15.532	317.216	3658.79		15.532	0.0010959	0.571858
15.554	320.808	3650.07		15.554	0.00148308	0.57037
15.576	321.439	3660.91		15.576	0.0015511	0.57222
15.598	323.847	3654.09		15.598	0.00181065	0.571057
15.62	323.849	3677.12		15.62	0.00181087	0.574985
15.642	322.987	3656.74		15.642	0.00171795	0.571508
15.664	318.866	3636.51		15.664	0.00127375	0.568057
15.686	321.026	3650.84		15.686	0.00150658	0.570501
15.708	321.369	3643.61		15.708	0.00154355	0.569269
15.73	320.363	3648.27		15.73	0.00143511	0.570064
15.752	320.998	3660.49		15.752	0.00150356	0.572149
15.774	316.126	3614.16		15.774	0.000978408	0.564244
15.796	322.576	3640.07		15.796	0.00167365	0.568665
15.818	317.999	3655.88		15.818	0.0011803	0.571362
15.84	319.644	3654.93		15.84	0.00135761	0.571199
15.862	322.526	3625.57		15.862	0.00166826	0.566191
15.884	319.318	3625.02		15.884	0.00132247	0.566097
15.906	321.975	3648.2		15.906	0.00160887	0.570052
15.928	320.882	3649.14		15.928	0.00149106	0.570213
15.95	321.286	3623.16		15.95	0.0015346	0.565779
15.972	318.519	3628.22		15.972	0.00123635	0.566643
15.994	322.665	3627.22		15.994	0.00168325	0.566472
16.016	320.86	3617.61		16.016	0.00148869	0.564832
16.038	317.027	3628.93		16.038	0.00107553	0.566764
16.06	320.131	3624.94		16.06	0.00141011	0.566083
16.082	318.815	3612.52		16.082	0.00126825	0.563964
16.104	317.235	3636.26		16.104	0.00109795	0.568015
16.126	321.759	3627.85		16.126	0.00158559	0.566579
16.148	320.614	3616.49		16.148	0.00146217	0.564641
16.17	317.463	3617.57		16.17	0.00112252	0.564825
16.192	315.349	3602.46		16.192	0.000894655	0.562247
16.214	315.889	3598.55		16.214	0.000952862	0.56158
16.236	311.38	3620.02		16.236	0.000466838	0.565243
16.258	317.45	3618.33		16.258	0.00112112	0.564955
16.28	309.1	3614.31		16.28	0.000221077	0.56427
16.302	312.027	3600.74		16.302	0.000536578	0.561954
16.324	312.349	3607.08		16.324	0.000571286	0.563036
16.346	315.923	3618.21		16.346	0.000956527	0.564935
16.368	317.329	3611.93		16.368	0.00110808	0.563862
16.39	311.489	3610.73		16.39	0.000478587	0.563659
16.412	315.663	3599.11		16.412	0.000928501	0.561676
16.434	314.111	3616.12		16.434	0.000761212	0.564578
16.456	316.905	3619.21		16.456	0.00106238	0.565105
16.478	316.155	3628.36		16.478	0.000981534	0.566666
16.5	317.755	3585.22		16.5	0.001154	0.559306
16.522	316.907	3592.78		16.522	0.00106259	0.560596
16.544	317.728	3591.72		16.544	0.00115109	0.560416
16.566	316.849	3559.69		16.566	0.00105634	0.55495
16.588	317.89	3565.12		16.588	0.00116855	0.555877
16.61	315.058	3573.61		16.61	0.000863289	0.557325
16.632	314.931	3583.56		16.632	0.000849599	0.559023
16.654	320.851	3555.39		16.654	0.00148771	0.554216
16.676	318.419	3557.11		16.676	0.00122557	0.55451
16.698	317.832	3584.61		16.698	0.0011623	0.559203
16.72	312.985	3565.95		16.72	0.00063984	0.556019
16.742	312.418	3560.6		16.742	0.000578723	0.555106
16.764	314.649	3563.32		16.764	0.000819203	0.555569
16.786	321.214	3555.68		16.786	0.00152684	0.554266
16.808	317.288	3557.53		16.808	0.00110366	0.554582
16.83	314.842	3567.83		16.83	0.000840006	0.55634
16.852	317.157	3550.96		16.852	0.00108954	0.553462
16.874	316.032	3560.78		16.874	0.000968276	0.555137
16.896	315.79	3538.61		16.896	0.000942191	0.551355
16.918	316.087	3550.64		16.918	0.000974204	0.553406
16.94	312.409	3560.52		16.94	0.000577753	0.555092
16.962	312.473	3553.12		16.962	0.000584652	0.553829
16.984	314.351	3541.23		16.984	0.000787081	0.551802
17.006	315.599	3548.88		17.006	0.000921603	0.553106
17.028	308.49	3547.44		17.028	0.000155325	0.55286
17.05	316.395	3518.68		17.05	0.0010074	0.547953
17.072	310.694	3503.73		17.072	0.000392894	0.545403
17.094	310.863	3494.13		17.094	0.00041111	0.543764
17.116	319.113	3506.82		17.116	0.00130038	0.545929
17.138	319.747	3522.31		17.138	0.00136871	0.548573
17.16	315.372	3521.2		17.16	0.000897135	0.548383
17.182	313.223	3516.11		17.182	0.000665494	0.547515
17.204	315.309	3508.7		17.204	0.000890344	0.54625
17.226	318.985	3485.08		17.226	0.00128658	0.542221
17.248	315.948	3486.89		17.248	0.000959221	0.542529
17.27	308.756	3484.8		17.27	0.000183997	0.542174
17.292	314.495	3498.06		17.292	0.000802603	0.544436
17.314	315.201	3493.26		17.314	0.000878703	0.543617
17.336	309.699	3519.79		17.336	0.000285643	0.548143
17.358	311.435	3502.3		17.358	0.000472766	0.545158
17.38	314.798	3484.22		17.38	0.000835263	0.542074
17.402	311.1	3485.37		17.402	0.000436657	0.54227
17.424	315.421	3511.55		17.424	0.000902416	0.546738
17.446	312.056	3495.16		17.446	0.000539704	0.543941
17.468	314.886	3492.76		17.468	0.000844749	0.543531
17.49	315.509	3497.64		17.49	0.000911902	0.544364
17.512	312.903	3498.23		17.512	0.000631002	0.544464
17.534	315.377	3506.06		17.534	0.000897674	0.545801
17.556	313.927	3516.08		17.556	0.000741378	0.54751
17.578	313.064	3508.23		17.578	0.000648356	0.546171
17.6	312.573	3511.93		17.6	0.000595431	0.546803
17.622	317.674	3475.35		17.622	0.00114527	0.540561
17.644	319.43	3498.67		17.644	0.00133455	0.544539
17.666	316.333	3521.9		17.666	0.00100072	0.548502
17.688	318.002	3486.7		17.688	0.00118062	0.542497
17.71	314.207	3495.36		17.71	0.000771559	0.543975
17.732	316.974	3511.89		17.732	0.00106981	0.546795
17.754	319.346	3506.09		17.754	0.00132549	0.545805
17.776	318.434	3513.62		17.776	0.00122719	0.54709
17.798	318.791	3476.68		17.798	0.00126567	0.540787
17.82	317.574	3502.42		17.82	0.00113449	0.545179
17.842	312.112	3481.4		17.842	0.00054574	0.541594
17.864	315.94	3467.81		17.864	0.000958359	0.539274
17.886	316.201	3452.89		17.886	0.000986492	0.536729
17.908	320.409	3450.97		17.908	0.00144007	0.536402
17.93	316.828	3468.14		17.93	0.00105408	0.539331
17.952	313.368	3476.07		17.952	0.000681124	0.540684
17.974	314.581	3466.59		17.974	0.000811873	0.539067
17.996	316.273	3466.85		17.996	0.000994253	0.539111
18.018	317.993	3487.98		18.018	0.00117965	0.542715
18.04	321.603	3450.83		18.04	0.00156877	0.536378
18.062	317.869	3456.97		18.062	0.00116629	0.537425
18.084	315.669	3464.24		18.084	0.000929148	0.538666
18.106	315.27	3432.93		18.106	0.00088614	0.533324
18.128	318.603	3438.05		18.128	0.0012454	0.534197
18.15	317.71	3445.62		18.15	0.00114915	0.53549
18.172	317.939	3459.86		18.172	0.00117383	0.537919
18.194	321.647	3431.81		18.194	0.00157352	0.533133
18.216	330.725	3420.86		18.216	0.00255203	0.531264
18.238	318.912	3449.45		18.238	0.00127871	0.536141
18.26	317.275	3454.95		18.26	0.00110226	0.53708
18.282	319.734	3456.14		18.282	0.00136731	0.537283
18.304	317.014	3436.49		18.304	0.00107413	0.53393
18.326	320.413	3439.24		18.326	0.0014405	0.5344
18.348	322.484	3415.04		18.348	0.00166374	0.530271
18.37	316.496	3447.9		18.37	0.00101829	0.535878
18.392	317.894	3436.61		18.392	0.00116898	0.533951
18.414	321.349	3433.42		18.414	0.00154139	0.533407
18.436	315.338	3417.78		18.436	0.00089347	0.530739
18.458	315.014	3446.7		18.458	0.000858546	0.535672
18.48	313.777	3438.32		18.48	0.00072521	0.534244
18.502	319.074	3426.61		18.502	0.00129617	0.532246
18.524	321.461	3440.99		18.524	0.00155347	0.534698
18.546	315.744	3411.31		18.546	0.000937232	0.529635
18.568	317.508	3421.38		18.568	0.00112737	0.531353
18.59	318.322	3419.2		18.59	0.00121511	0.530981
18.612	321.441	3424.26		18.612	0.00155131	0.531845
18.634	318.385	3418.89		18.634	0.00122191	0.530928
18.656	326.585	3420		18.656	0.00210578	0.531117
18.678	327.845	3426.73		18.678	0.0022416	0.532265
18.7	318.682	3423.84		18.7	0.00125392	0.531772
18.722	321.697	3417.1		18.722	0.00157891	0.530623
18.744	320.36	3403.64		18.744	0.00143479	0.528327
18.766	318.126	3410.36		18.766	0.00119399	0.529473
18.788	317.007	3409.5		18.788	0.00107337	0.529327
18.81	315.456	3406.58		18.81	0.000906189	0.528827
18.832	317.73	3402.78		18.832	0.0011513	0.52818
18.854	318.788	3388.28		18.854	0.00126534	0.525705
18.876	321.264	3394.28		18.876	0.00153223	0.52673
18.898	316.652	3415.03		18.898	0.00103511	0.53027
18.92	316.871	3436.5		18.92	0.00105871	0.533933
18.942	317.792	3407.03		18.942	0.00115799	0.528904
18.964	317.39	3396.77		18.964	0.00111465	0.527154
18.986	319.618	3399.12		18.986	0.00135481	0.527555
19.008	319.368	3413.24		19.008	0.00132786	0.529965
19.03	322.114	3390.65		19.03	0.00162385	0.52611
19.052	321.449	3388.37		19.052	0.00155217	0.525721
19.074	318.907	3415.03		19.074	0.00127817	0.53027
19.096	316.453	3423.3		19.096	0.00101366	0.53168
19.118	319.805	3391.7		19.118	0.00137497	0.526289
19.14	315.477	3387.93		19.14	0.000908452	0.525646
19.162	315.711	3415.52		19.162	0.000933675	0.530353
19.184	311.019	3396.82		19.184	0.000427926	0.527162
19.206	313.179	3409.08		19.206	0.000660752	0.529255
19.228	317.621	3402.93		19.228	0.00113955	0.528204
19.25	312.62	3397.11		19.25	0.000600497	0.527212
19.272	314.426	3375.95		19.272	0.000795165	0.523602
19.294	319.102	3419		19.294	0.00129919	0.530946
19.316	314.609	3409.5		19.316	0.000814891	0.529326
19.338	320.073	3394.84		19.338	0.00140385	0.526824
19.36	317.723	3384.03		19.36	0.00115055	0.524981
19.382	320.527	3388.47		19.382	0.00145279	0.525739
19.404	320.526	3370.84		19.404	0.00145268	0.522731
19.426	319.206	3380.68		19.426	0.0013104	0.524409
19.448	317.894	3383.03		19.448	0.00116898	0.524809
19.47	314.603	3390.1		19.47	0.000814244	0.526016
19.492	320.607	3373.81		19.492	0.00146141	0.523237
19.514	316.014	3380.57		19.514	0.000966336	0.52439
19.536	324.29	3377.37		19.536	0.0018584	0.523844
19.558	317.482	3353.97		19.558	0.00112457	0.519853
19.58	314.946	3364.45		19.58	0.000851216	0.521641
19.602	313.826	3358.46		19.602	0.000730492	0.520618
19.624	316.513	3356.11		19.624	0.00102012	0.520218
19.646	314.917	3352.68		19.646	0.00084809	0.519632
19.668	314.18	3343.22		19.668	0.000768649	0.518017
19.69	316.23	3358.95		19.69	0.000989618	0.520701
19.712	316.37	3352.67		19.712	0.00100471	0.51963
19.734	319.785	3347.82		19.734	0.00137281	0.518802
19.756	317.508	3366.5		19.756	0.00112737	0.52199
19.778	315.559	3355.19		19.778	0.000917291	0.52006
19.8	318.867	3352.4		19.8	0.00127386	0.519584
19.822	316.725	3334.17		19.822	0.00104297	0.516474
19.844	315.467	3320.79		19.844	0.000907375	0.514191
19.866	314.016	3328.7		19.866	0.000750972	0.51554
19.888	315.435	3338.27		19.888	0.000903925	0.517174
19.91	317.766	3321.27		19.91	0.00115518	0.514273
19.932	317.988	3344.98		19.932	0.00117911	0.518318
19.954	319.183	3324.18		19.954	0.00130792	0.514769
19.976	314.215	3311.5		19.976	0.000772422	0.512607
19.998	313.606	3327.63		19.998	0.000706778	0.515358
20.02	318.309	3328.05		20.02	0.00121371	0.515429
20.042	319.528	3303.24		20.042	0.00134511	0.511197
20.064	314.146	3326.89		20.064	0.000764984	0.515231
20.086	319.326	3331.81		20.086	0.00132334	0.516071
20.108	316.175	3349.56		20.108	0.00098369	0.5191
20.13	318.326	3326.84		20.13	0.00121555	0.515223
20.152	317.106	3315.91		20.152	0.00108404	0.513358
20.174	316.129	3308.31		20.174	0.000978731	0.512062
20.196	314.54	3295.29		20.196	0.000807453	0.50984
20.218	317.445	3311.61		20.218	0.00112058	0.512625
20.24	315.244	3322.59		20.24	0.000883337	0.514498
20.262	316.523	3310.62		20.262	0.0010212	0.512457
20.284	315.755	3345.19		20.284	0.000938418	0.518354
20.306	316.61	3317.88		20.306	0.00103058	0.513695
20.328	314.736	3287.98		20.328	0.00082858	0.508594
20.35	313.716	3301.78		20.35	0.000718635	0.510948
20.372	313.721	3308.97		20.372	0.000719174	0.512174
20.394	313.131	3321.8		20.394	0.000655578	0.514363
20.416	316.871	3305.73		20.416	0.00105871	0.511621
20.438	311.168	3329.2		20.438	0.000443986	0.515627
20.46	311.058	3339.89		20.46	0.000432129	0.517451
20.482	310.2	3335.35		20.482	0.000339646	0.516676
20.504	311.969	3341.74		20.504	0.000530326	0.517765
20.526	313.425	3298.58		20.526	0.000687268	0.510402
20.548	311.47	3302.84		20.548	0.000476539	0.511128
20.57	313.158	3292.09		20.57	0.000658488	0.509294
20.592	314.161	3288.69		20.592	0.000766601	0.508714
20.614	314.506	3254.31		20.614	0.000803789	0.502849
20.636	314.76	3254.88		20.636	0.000831167	0.502946
20.658	316.128	3287.46		20.658	0.000978624	0.508504
20.68	312.615	3292.8		20.68	0.000599958	0.509415
20.702	312.625	3281.36		20.702	0.000601036	0.507465
20.724	316.077	3267.64		20.724	0.000973126	0.505123
20.746	309.461	3271.65		20.746	0.000259989	0.505807
20.768	314.168	3273.41		20.768	0.000767356	0.506108
20.79	313.498	3289.61		20.79	0.000695136	0.508871
20.812	316.562	3300.62		20.812	0.0010254	0.510749
20.834	313.739	3275.88		20.834	0.000721114	0.506528
20.856	316.829	3275.23		20.856	0.00105418	0.506418
20.878	314.318	3282.79		20.878	0.000783524	0.507708
20.9	312.253	3295.45		20.9	0.000560938	0.509868
20.922	318.064	3274.09		20.922	0.0011873	0.506223
20.944	310.265	3289.37		20.944	0.000346652	0.50883
20.966	313.655	3264.3		20.966	0.000712059	0.504553
20.988	315.265	3261.96		20.988	0.000885601	0.504153
21.01	313.58	3288.88		21.01	0.000703975	0.508747
21.032	315.415	3253.27		21.032	0.00090177	0.502672
21.054	315.65	3255.39		21.054	0.0009271	0.503033
21.076	312.094	3262.99		21.076	0.0005438	0.504329
21.098	310.421	3247.29		21.098	0.000363467	0.50165
21.12	308.5	3245.56		21.12	0.000156403	0.501356
21.142	309.719	3259.4		21.142	0.000287799	0.503716
21.164	311.62	3233.13		21.164	0.000492707	0.499236
21.186	308.901	3257.74		21.186	0.000199627	0.503433
21.208	308.326	3266.92		21.208	0.000137648	0.505
21.23	312.538	3255.44		21.23	0.000591658	0.503042
21.252	308.973	3247.99		21.252	0.000207388	0.50177
21.274	310.127	3230.7		21.274	0.000331777	0.49882
21.296	312.28	3238.2		21.296	0.000563848	0.5001
21.318	311.544	3227.92		21.318	0.000484515	0.498346
21.34	312.903	3248.21		21.34	0.000631002	0.501807
21.362	309.451	3235.1		21.362	0.000258911	0.499571
21.384	309.936	3231.83		21.384	0.000311189	0.499014
21.406	311.603	3241.56		21.406	0.000490875	0.500673
21.428	310.213	3250.41		21.428	0.000341047	0.502184
21.45	307.495	3265.59		21.45	4.80743e-05	0.504773
21.472	307.049	3230.9		21.472	0	0.498855
21.494	307.423	3209.66		21.494	4.03134e-05	0.495231
21.516	314.161	3224.01		21.516	0.000766601	0.497678
21.538	310.807	3229		21.538	0.000405074	0.498531
21.56	310.265	3246.44		21.56	0.000346652	0.501506
21.582	307.154	3215.17		21.582	1.13179e-05	0.49617
21.604	311.319	3243.5		21.604	0.000460262	0.501004
21.626	314.926	3257.22		21.626	0.00084906	0.503345
21.648	311.191	3240.88		21.648	0.000446465	0.500557
21.67	309.944	3242.14		21.67	0.000312051	0.500773
21.692	311.066	3214.84		21.692	0.000432992	0.496115
21.714	312.839	3224.32		21.714	0.000624103	0.497731
21.736	312.346	3229.7		21.736	0.000570963	0.49865
21.758	310.819	3227.5		21.758	0.000406368	0.498275
21.78	309.407	3252.87		21.78	0.000254168	0.502603
21.802	314.711	3230.23		21.802	0.000825886	0.498741
21.824	314.55	3197.43		21.824	0.000808531	0.493144
21.846	310.588	3214.62		21.846	0.000381468	0.496077
21.868	310.997	3213.74		21.868	0.000425554	0.495926
21.89	311.296	3213.37		21.89	0.000457783	0.495864
21.912	308.036	3202.66		21.912	0.000106389	0.494037
21.934	310.389	3172.57		21.934	0.000360018	0.488903
21.956	308.983	3221.31		21.956	0.000208465	0.497219
21.978	311.513	307		21.978	0.000481174	0
