# Supplementary material for: Membrane-mediated dimerization potentiates PIP5K lipid kinase activity
Source: eLife. 2022 Aug 17;11:e73747. doi: 10.7554/eLife.73747 (PMC9470164; doi:10.7554/eLife.73747)
Supplement: Figure 2—figure supplement 2—source data 1. [file elife-73747-fig2-figsupp2-data1.xlsx]

## Sheet: Figure 2 - Fig Supp 2
Figure 2 - figure supplement 2
see Figure 2B source data
