# Supplementary material for: Membrane-mediated dimerization potentiates PIP5K lipid kinase activity
Source: eLife. 2022 Aug 17;11:e73747. doi: 10.7554/eLife.73747 (PMC9470164; doi:10.7554/eLife.73747)
Supplement: Figure 2—figure supplement 3—source data 1. [file elife-73747-fig2-figsupp3-data1.xlsx]

## Sheet: Figure 2 - Fig Supp 3
Figure 2 - figure supplement 3
	Alexa647-PI4P5K		Atto655-DPPE
[dye] nM	mean	SD	mean	SD
200	739990900	1330802	290487200	896690
100	381764500	863849	149131200	438786
50	196370400	722815	77305600	229569
25	101309100	553410	41233610	111321
0	4754606	23862	4751366	45072.6
