# Supplementary material for: Membrane-mediated dimerization potentiates PIP5K lipid kinase activity
Source: eLife. 2022 Aug 17;11:e73747. doi: 10.7554/eLife.73747 (PMC9470164; doi:10.7554/eLife.73747)
Supplement: Figure 2—source data 1. [file elife-73747-fig2-data1.xlsx]

## Sheet: Figure 2B
Figure 2B		this spreadseet contains all the data used to calculate the mean dwell times in Table 1 that are associated with Figure 2B
1 pM Ax647-5KB												1 pM Ax647-5KB + 200 pM 5KB										1 pM Ax647-5KB + 1 nM 5KB										1 pM Ax647-5KB + 5 nM 5KB										1 pM Ax647-5KB + 10 nM 5KB
Dwell times (second, raw data)					Cumulative distribution frequency							Dwell times (second, raw data)				Cumulative distribution frequency						Dwell times (second, raw data)				Cumulative distribution frequency						Dwell times (second, raw data)				Cumulative distribution frequency						Dwell times (second, raw data)				Cumulative distribution frequency
mov 1	mov 2	mov 3	mov 4	mov 5	BIN time (sec)	mov 1	mov 2	mov 3	mov 4	mov 5		mov 1	mov 2	mov 3	mov 4	BIN time (sec)	mov 1	mov 2	mov 3	mov 4		mov 1	mov 2	mov 3	mov 4	BIN time (sec)	mov 1	mov 2	mov 3	mov 4		mov 1	mov 2	mov 3	mov 4	BIN time (sec)	mov 1	mov 2	mov 3	mov 4		mov 1	mov 2	mov 3		BIN time (sec)	mov 1	mov 2	mov 3
0.1	0.1	0.1	0.1	0.1	0	0	0	0	0	0		0.15	0.25	0.1	0.1	0	0	0	0	0		0.2	0.2	0.1	0.1	0	0	0	0	0		0.2	0.1	0.2	0.1	0	0	0	0	0		0.1	0.45	0.4		0	0	0	0
0.2	0.15	0.1	0.1	0.25	0.05	0	0	0	0	0		0.15	0.1	0.15	0.1	0.05	0	0	0	0		0.2	0.1	0.2	0.25	0.05	0	0	0	0		0.2	0.1	0.1	0.2	0.05	0	0	0	0		0.3	0.6	0.1		0.05	0	0	0
0.15	0.3	0.1	0.15	0.3	0.1	0.131193	0.144681	0.126301	0.13877	0.163174		0.15	0.35	0.1	0.2	0.1	0.110024	0.142471	0.135915	0.124792		0.1	0.6	0.3	0.15	0.1	0.123872	0.0918367	0.112281	0.0985577		0.2	0.1	0.1	0.15	0.1	0.0832595	0.0959446	0.0871111	0.0837488		0.4	0.35	0.4		0.1	0.0679487	0.0645554	0.0722733
0.25	0.35	0.25	0.15	0.1	0.15	0.240754	0.256738	0.238723	0.251788	0.264222		0.1	0.45	0.2	0.15	0.15	0.216789	0.268711	0.230828	0.212978		0.3	0.6	0.1	0.25	0.15	0.212469	0.183673	0.212281	0.192308		0.1	0.1	0.15	0.1	0.15	0.165633	0.16815	0.170667	0.151545		0.35	0.2	0.1		0.15	0.124359	0.112058	0.127464
0.15	0.2	0.1	0.15	0.1	0.2	0.323098	0.34539	0.32755	0.335479	0.351796		0.3	0.1	0.2	0.45	0.2	0.310513	0.355275	0.329537	0.306988		0.1	0.15	0.35	0.2	0.2	0.295324	0.265306	0.281579	0.272436		0.5	0.2	0.65	0.2	0.2	0.230292	0.248269	0.238222	0.214357		0.3	0.25	0.15		0.2	0.173077	0.175396	0.169514
0.2	0.1	0.15	0.25	0.3	0.25	0.395673	0.422695	0.417765	0.413448	0.429641		0.6	0.25	0.4	0.25	0.25	0.382233	0.442741	0.408504	0.389351		0.55	0.4	0.15	0.2	0.25	0.365053	0.333333	0.362281	0.338141		0.2	0.35	0.2	0.15	0.25	0.290523	0.298714	0.288	0.27318		0.3	0.15	0.7		0.25	0.208974	0.221681	0.219448
0.4	0.4	0.3	0.35	0.1	0.3	0.468248	0.494326	0.480222	0.474249	0.498503		0.35	0.25	0.4	0.2	0.3	0.447433	0.507665	0.473804	0.455907		0.1	0.75	0.65	0.5	0.3	0.430681	0.40051	0.421053	0.413462		0.45	0.15	0.45	0.7	0.3	0.345438	0.354105	0.339556	0.324028		0.1	1.05	0.25		0.3	0.255128	0.266748	0.257556
0.1	0.2	0.35	0.2	0.25	0.35	0.525471	0.556738	0.538515	0.540773	0.555389		0.4	0.15	0.55	0.3	0.35	0.504482	0.563571	0.53227	0.512479		0.45	0.35	0.25	0.45	0.35	0.489746	0.467687	0.470175	0.459135		0.15	0.15	0.2	0.15	0.35	0.386182	0.400593	0.381333	0.368893		0.8	0.5	0.3		0.35	0.303846	0.305725	0.30092
0.2	0.15	0.15	0.3	0.2	0.4	0.579902	0.592199	0.580153	0.595136	0.603293		0.15	0.3	0.55	0.55	0.4	0.544417	0.616772	0.588459	0.574043		0.2	0.25	0.55	0.55	0.4	0.521739	0.511905	0.510526	0.505609		0.3	0.15	0.75	0.25	0.4	0.429584	0.44906	0.425778	0.418744		0.1	0.95	0.8		0.4	0.348718	0.344702	0.335085
0.6	0.5	0.15	0.2	0.3	0.45	0.627355	0.643972	0.637058	0.636624	0.648204		0.6	0.45	0.25	0.45	0.45	0.581092	0.671776	0.634017	0.618136		0.65	0.25	0.3	0.7	0.45	0.561116	0.560374	0.553509	0.555288		0.6	0.2	0.5	0.75	0.45	0.476528	0.495549	0.470222	0.463609		0.55	1.5	0.45		0.45	0.384615	0.386114	0.363995
0.2	0.25	0.35	0.5	0.35	0.5	0.674808	0.692199	0.675226	0.678112	0.682635		0.55	1	0.1	0.65	0.5	0.608802	0.700631	0.678815	0.667221		0.35	0.3	0.25	0.5	0.5	0.598852	0.596088	0.588596	0.601763		0.5	0.2	0.1	0.5	0.5	0.5155	0.52819	0.493333	0.514457		0.15	0.75	1.05		0.5	0.411538	0.414129	0.399474
0.25	0.45	0.2	0.25	0.15	0.55	0.709002	0.724823	0.714781	0.719599	0.71482		0.4	0.7	0.15	0.2	0.55	0.637327	0.726781	0.711465	0.703827		0.1	0.75	0.1	0.8	0.55	0.635767	0.632653	0.633333	0.641026		0.95	0.25	0.1	0.95	0.55	0.539415	0.552918	0.515556	0.547358		1.3	0.6	0.15		0.55	0.448718	0.447016	0.429698
0.3	0.1	0.1	0.85	0.35	0.6	0.738311	0.756028	0.741152	0.755365	0.753743		0.65	1	0.15	0.6	0.6	0.682152	0.758341	0.744115	0.737105		0.3	0.2	0.15	0.2	0.6	0.673503	0.671769	0.670175	0.676282		0.15	0.7	0.25	0.55	0.6	0.572188	0.578635	0.538667	0.574277		0.6	1.45	0.3		0.6	0.488462	0.476248	0.465177
0.5	0.45	0.35	0.65	0.1	0.65	0.762736	0.785106	0.766135	0.781116	0.773952		0.2	0.15	0.3	0.1	0.65	0.717196	0.779982	0.767654	0.768719		0.75	0.75	0.2	0.15	0.65	0.699754	0.69898	0.696491	0.699519		0.15	0.25	0.15	0.25	0.65	0.607617	0.607319	0.567111	0.594217		0.45	0.4	0.55		0.65	0.523077	0.498173	0.500657
0.1	0.25	0.65	0.4	0.25	0.7	0.792742	0.812057	0.788341	0.807582	0.797904		0.45	0.45	0.65	0.1	0.7	0.739201	0.800721	0.791951	0.795341		0.2	0.15	0.85	0.4	0.7	0.722724	0.721939	0.723684	0.726763		0.25	0.6	0.65	0.25	0.7	0.637733	0.636004	0.594667	0.621137		1.8	0.35	1.15		0.7	0.54359	0.517661	0.547963
0.45	0.4	0.3	0.7	0.15	0.75	0.806699	0.835461	0.804997	0.82475	0.819611		0.65	0.3	0.3	0.15	0.75	0.762836	0.825068	0.807137	0.824459		0.2	0.65	0.65	0.3	0.75	0.746514	0.755102	0.741228	0.751603		0.1	0.75	0.1	0.5	0.75	0.678477	0.665678	0.625778	0.642074		0.8	0.2	0.45		0.75	0.557692	0.54324	0.574244
0.65	0.25	0.2	0.55	0.15	0.8	0.827634	0.850355	0.825121	0.840486	0.838323		0.65	0.7	0.1	0.35	0.8	0.779951	0.839495	0.828398	0.838602		1	0.55	0.45	0.35	0.8	0.768663	0.77551	0.759649	0.780449		1	0.6	0.1	0.2	0.8	0.693534	0.682493	0.653333	0.668993		0.55	1.35	0.2		0.8	0.584615	0.5676	0.604468
0.6	0.1	0.55	0.25	0.3	0.85	0.851361	0.861702	0.843164	0.855508	0.852545		0.1	1.1	0.15	0.55	0.85	0.794621	0.857529	0.842825	0.859401		0.2	0.55	0.35	0.25	0.85	0.78671	0.795068	0.782456	0.800481		0.75	0.85	0.45	0.3	0.85	0.709477	0.704253	0.676444	0.688933		1.95	1.25	0.65		0.85	0.605128	0.594397	0.620237
0.95	0.15	0.2	0.7	0.9	0.9	0.86462	0.880851	0.859126	0.874821	0.871257		0.8	0.1	0.3	0.25	0.9	0.815811	0.870153	0.85877	0.872712		0.35	0.4	0.55	0.15	0.9	0.806399	0.819728	0.803509	0.811699		0.2	1.05	0.6	0.1	0.9	0.727192	0.721068	0.690667	0.711864		0.1	0.15	0.4		0.9	0.619231	0.616322	0.637319
0.45	0.5	0.5	0.4	0.1	0.95	0.877879	0.895745	0.872311	0.889127	0.883982		0.2	0.85	0.1	0.25	0.95	0.834556	0.880974	0.866363	0.881864		0.65	0.3	0.95	0.45	0.95	0.828548	0.836735	0.82193	0.826122		0.15	0.6	0.25	1.55	0.95	0.750221	0.742829	0.705778	0.735793		2.1	0.85	0.6		0.95	0.641026	0.634592	0.654402
0.25	0.2	0.5	0.2	0.1	1	0.892533	0.905674	0.882026	0.904864	0.899701		0.3	0.5	0.45	0.1	1	0.853301	0.896303	0.879271	0.887687		0.8	0.3	0.15	0.5	1	0.842494	0.853741	0.838596	0.848558		0.15	0.65	1.2	0.2	1	0.764393	0.755687	0.724444	0.752742		0.35	1.1	0.85		1	0.655128	0.645554	0.666229
0.35	0.3	0.25	0.6	0.6	1.05	0.902303	0.913475	0.89313	0.913448	0.91018		0.8	0.1	0.35	0.5	1.05	0.872861	0.906222	0.892938	0.897671		0.35	0.15	0.15	0.3	1.05	0.854799	0.863095	0.849123	0.858173		1.3	0.2	1.15	0.65	1.05	0.781222	0.769535	0.746667	0.762712		0.85	2.05	0.15		1.05	0.666667	0.674787	0.684625
0.5	0.1	1.05	0.7	0.1	1.1	0.911375	0.920567	0.902151	0.924893	0.918413		0.35	0.2	1.05	0.25	1.1	0.885086	0.917042	0.902809	0.907654		0.1	0.1	0.1	0.55	1.1	0.867104	0.872449	0.859649	0.869391		0.35	0.3	0.4	0.25	1.1	0.789194	0.77547	0.759111	0.77667		2.9	0.3	0.6		1.1	0.687179	0.690621	0.70565
0.4	0.3	0.55	0.4	0.25	1.15	0.91626	0.929078	0.911867	0.932046	0.923653		0.1	0.15	0.25	0.15	1.15	0.894866	0.920649	0.91344	0.912646		0.15	1.15	0.2	0.4	1.15	0.879409	0.883503	0.869298	0.88141		1.45	0.45	0.75	0.2	1.15	0.79628	0.785361	0.773333	0.78664		1	0.8	1.9		1.15	0.70641	0.705238	0.726675
0.6	0.9	0.15	0.15	0.35	1.2	0.926029	0.935461	0.916724	0.938484	0.930389		0.7	0.4	0.1	0.65	1.2	0.904645	0.927863	0.918755	0.924293		0.1	0.15	0.2	1.2	1.2	0.887613	0.893707	0.877193	0.890224		0.65	0.2	0.1	0.25	1.2	0.809566	0.79822	0.784	0.797607		0.25	0.45	0.65		1.2	0.717949	0.711328	0.733246
0.2	0.45	0.15	0.7	0.15	1.25	0.933008	0.941135	0.92297	0.944921	0.937874		1	0.2	0.15	0.1	1.25	0.914425	0.933273	0.922551	0.936772		0.65	0.95	1.1	0.25	1.25	0.898277	0.905612	0.885965	0.900641		0.25	0.1	1.7	1.15	1.25	0.821966	0.810089	0.798222	0.811565		2	1	0.15		1.25	0.730769	0.723508	0.746386
0.85	0.65	0.45	0.65	1.3	1.3	0.936497	0.946809	0.927828	0.949213	0.943862		0.3	0.7	0.2	0.15	1.3	0.92013	0.939585	0.930904	0.945092		0.75	0.4	0.15	0.8	1.3	0.908121	0.912415	0.890351	0.905449		0.4	1.35	1.25	0.5	1.3	0.829938	0.820969	0.808889	0.827517		1.85	1.5	1.3		1.3	0.739744	0.738124	0.762155
0.8	0.15	0.95	1.2	0.4	1.35	0.939986	0.951773	0.934074	0.954936	0.946856		0.35	0.25	0.4	0.15	1.35	0.92502	0.945897	0.935459	0.951747		1.3	0.25	0.55	0.35	1.35	0.912223	0.920068	0.896491	0.91266		1.35	0.5	1.05	0.2	1.35	0.845881	0.828882	0.817778	0.837488		1	0.55	1.05		1.35	0.746154	0.750305	0.777924
0.25	0.15	1.35	0.15	0.3	1.4	0.944173	0.957447	0.941013	0.958512	0.952096		0.15	0.7	0.2	0.15	1.4	0.932355	0.951307	0.939256	0.954243		0.8	1.1	0.2	0.55	1.4	0.918786	0.92432	0.900877	0.919071		0.75	0.7	0.3	1.6	1.4	0.85651	0.829871	0.827556	0.842473		1.7	0.85	1.3		1.4	0.75641	0.760049	0.788436
0.45	0.4	0.15	0.2	0.2	1.45	0.946964	0.960284	0.945177	0.960658	0.955838		0.55	0.1	0.1	0.15	1.45	0.940505	0.954914	0.94533	0.958403		0.3	0.25	0.35	0.15	1.45	0.922067	0.931973	0.910526	0.925481		0.4	0.15	0.2	0.15	1.45	0.863596	0.840752	0.835556	0.85344		1.15	0.45	1		1.45	0.765385	0.772229	0.792378
0.25	0.1	0.85	1.05	0.75	1.5	0.951151	0.963121	0.952117	0.96495	0.958832		0.15	0.25	0.1	0.25	1.5	0.943765	0.961226	0.948368	0.958403		0.15	0.5	0.1	0.9	1.5	0.92781	0.937075	0.919298	0.929487		0.55	0.3	0.1	0.5	1.5	0.868911	0.85361	0.846222	0.859422		0.15	0.1	0.2		1.5	0.778205	0.785627	0.797635
0.1	0.2	0.2	0.65	0.2	1.55	0.956734	0.963121	0.95628	0.967096	0.966317		0.2	0.2	0.4	0.95	1.55	0.947025	0.963931	0.953683	0.962562		0.85	0.1	0.85	0.35	1.55	0.934372	0.937925	0.92193	0.933494		0.55	1.65	0.1	0.35	1.55	0.873339	0.864491	0.858667	0.86341		2.3	2.2	0.3		1.55	0.787179	0.79659	0.806833
0.25	0.15	0.1	0.15	0.2	1.6	0.962317	0.965957	0.961138	0.969242	0.970808		0.15	1	0.6	0.85	1.6	0.9511	0.96844	0.960516	0.966722		0.35	0.3	0.1	0.2	1.6	0.941756	0.944728	0.927193	0.940705		0.15	1.05	0.45	0.15	1.6	0.879539	0.871414	0.866667	0.872383		0.1	0.4	0.45		1.6	0.79359	0.806334	0.81866
0.1	0.1	0.3	0.3	0.15	1.65	0.966504	0.968794	0.964608	0.972818	0.973802		0.7	0.2	0.7	0.1	1.65	0.95599	0.972047	0.965072	0.97005		0.1	0.3	0.55	0.1	1.65	0.943396	0.95068	0.928947	0.942308		0.7	0.75	0.1	0.1	1.65	0.887511	0.877349	0.874667	0.878365		0.25	0.3	1.2		1.65	0.808974	0.813642	0.821288
0.6	0.25	0.45	0.1	1.2	1.7	0.967202	0.970213	0.968078	0.974249	0.974551		0.2	0.15	1.15	0.85	1.7	0.96414	0.97385	0.970387	0.972546		0.45	0.8	0.8	0.1	1.7	0.946678	0.955782	0.935965	0.947917		1.35	0.5	0.3	0.3	1.7	0.892826	0.883284	0.880889	0.884347		0.8	0.2	0.75		1.7	0.816667	0.82704	0.835742
1.15	0.1	0.45	1.4	0.15	1.75	0.970691	0.973759	0.971548	0.97711	0.977545		0.6	0.35	0.25	0.15	1.75	0.966585	0.97385	0.973424	0.973378		0.3	0.6	0.45	1.35	1.75	0.950779	0.959184	0.940351	0.951923		0.15	0.4	0.45	0.45	1.75	0.899026	0.888229	0.888889	0.889332		0.85	0.15	0.15		1.75	0.825641	0.836784	0.838371
0.65	0.2	0.4	0.4	0.85	1.8	0.972087	0.975887	0.973629	0.979256	0.97979		1.35	0.1	0.15	0.1	1.8	0.969845	0.97385	0.977221	0.975042		0.15	0.25	0.15	0.65	1.8	0.954061	0.961735	0.942105	0.955128		0.75	1.95	0.1	0.75	1.8	0.905226	0.893175	0.897778	0.892323		3.05	0.95	0.25		1.8	0.835897	0.842875	0.840999
0.4	0.1	0.25	0.9	0.2	1.85	0.974878	0.977305	0.975017	0.981402	0.983533		0.45	1.7	0.1	0.15	1.85	0.97229	0.978359	0.97874	0.978369		0.35	0.45	0.3	0.55	1.85	0.960623	0.961735	0.942105	0.957532		0.7	0.25	0.7	1.45	1.85	0.909655	0.900099	0.900444	0.898305		0.15	0.75	0.2		1.85	0.84359	0.852619	0.847569
0.3	0.25	0.7	0.95	0.75	1.9	0.978367	0.980142	0.979181	0.983548	0.986527		0.1	0.6	0.1	0.55	1.9	0.973105	0.979261	0.981017	0.985025		1.15	0.85	0.85	1.25	1.9	0.961444	0.965136	0.946491	0.96234		1.65	0.35	1.3	0.15	1.9	0.91674	0.907023	0.907556	0.904287		0.3	2.05	1.3		1.9	0.848718	0.857491	0.854139
0.25	0.75	0.3	0.15	0.55	1.95	0.980461	0.980851	0.981957	0.984263	0.988772		0.4	1.1	1.65	1.1	1.95	0.976365	0.979261	0.984814	0.985025		0.55	0.25	0.15	0.45	1.95	0.964725	0.969388	0.951754	0.967147		0.15	1.85	0.3	0.3	1.95	0.917626	0.914936	0.911111	0.909272		0.85	2.45	2.05		1.95	0.857692	0.866017	0.856767
0.2	0.95	0.3	0.15	0.3	2	0.980461	0.98156	0.984039	0.984979	0.991766		0.4	2.3	0.1	0.45	2	0.979625	0.980162	0.985573	0.985857		0.7	0.2	0.15	0.2	2	0.965546	0.971939	0.95614	0.967949		0.9	0.7	0.15	0.55	2	0.920283	0.915925	0.914667	0.914257		0.7	1.05	0.2		2	0.865385	0.870889	0.863338
0.1	0.1	1.8	0.25	0.25	2.05	0.983252	0.984397	0.984733	0.986409	0.992515		0.15	0.6	0.1	0.2	2.05	0.98044	0.981064	0.987851	0.986689		0.2	0.35	1.95	0.55	2.05	0.966366	0.973639	0.959649	0.971955		0.85	0.3	0.1	0.25	2.05	0.925598	0.923838	0.914667	0.914257		1.65	3.2	0.25		2.05	0.871795	0.876979	0.87385
1.1	0.65	0.25	0.35	0.8	2.1	0.986043	0.985106	0.984733	0.987124	0.99476		0.35	0.1	0.15	0.1	2.1	0.981255	0.982867	0.987851	0.986689		0.9	0.2	0.1	0.85	2.1	0.968827	0.97619	0.961404	0.973558		0.3	0.1	0.35	0.1	2.1	0.928255	0.926805	0.918222	0.918245		1.6	2	2.15		2.1	0.879487	0.881851	0.876478
0.25	0.35	0.15	0.85	0.4	2.15	0.99023	0.985106	0.986815	0.98927	0.99476		0.25	0.1	0.35	0.5	2.15	0.98207	0.983769	0.98937	0.986689		0.3	0.2	0.65	0.3	2.15	0.968827	0.977891	0.965789	0.977564		0.2	0.95	0.75	0.1	2.15	0.932684	0.930762	0.922667	0.921236		0.65	0.15	0.15		2.15	0.884615	0.891596	0.884363
0.3	0.55	0.25	0.35	0.75	2.2	0.99023	0.986525	0.986815	0.989986	0.99476		0.2	0.3	0.15	0.1	2.2	0.9837	0.984671	0.98937	0.986689		0.25	0.35	2.3	0.3	2.2	0.969647	0.979592	0.966667	0.978365		0.5	0.45	2.1	1.9	2.2	0.936227	0.936696	0.928	0.924227		0.15	1.35	0.15		2.2	0.888462	0.897686	0.886991
0.15	0.3	0.25	0.4	0.2	2.25	0.99023	0.99078	0.988203	0.990701	0.99476		0.55	0.35	0.4	0.6	2.25	0.9837	0.986474	0.990129	0.987521		0.55	0.2	0.1	1.15	2.25	0.970468	0.980442	0.967544	0.979968		0.35	0.1	0.15	0.55	2.25	0.940655	0.939664	0.934222	0.929212		0.35	0.55	0.1		2.25	0.891026	0.900122	0.890933
1	0.55	1.15	0.2	0.25	2.3	0.991626	0.992199	0.990285	0.991416	0.99476		0.35	0.25	0.95	0.55	2.3	0.984515	0.987376	0.990888	0.990017		0.55	0.3	0.7	1.6	2.3	0.972108	0.980442	0.971053	0.981571		0.6	2.2	0.7	0.3	2.3	0.944198	0.941642	0.937778	0.929212		0.15	0.15	0.1		2.3	0.897436	0.903776	0.894875
0.7	0.65	0.55	0.4	0.15	2.35	0.991626	0.994326	0.991672	0.991416	0.996257		0.45	0.2	0.2	1.25	2.35	0.98533	0.988278	0.990888	0.990017		0.5	0.5	0.15	1.15	2.35	0.972929	0.982143	0.97193	0.983974		1.15	0.65	1.9	2.25	2.35	0.944198	0.947577	0.941333	0.932203		0.75	1.35	0.5		2.35	0.9	0.909866	0.898817
0.95	0.3	0.3	0.8	0.55	2.4	0.992324	0.995035	0.991672	0.992132	0.996257		1.2	0.15	0.5	0.7	2.4	0.986145	0.989179	0.991648	0.990849		0.9	1.15	0.2	0.5	2.4	0.97539	0.982993	0.97193	0.983974		1.05	0.55	0.2	1.15	2.4	0.945084	0.949555	0.944889	0.936191		1.95	1.85	0.25		2.4	0.90641	0.911084	0.905388
0.1	0.3	0.1	0.35	0.25	2.45	0.992324	0.995035	0.991672	0.992847	0.997754		0.4	0.3	0.3	0.9	2.45	0.98696	0.989179	0.991648	0.991681		0.85	0.5	0.1	0.2	2.45	0.97703	0.983844	0.97193	0.985577		1.45	1	0.7	0.85	2.45	0.946856	0.950544	0.952	0.941176		0.2	1.05	0.7		2.45	0.912821	0.918392	0.910644
2.05	1.1	0.15	0.3	0.45	2.5	0.993022	0.995035	0.99306	0.994278	0.997754		0.4	0.65	0.75	0.7	2.5	0.987775	0.989179	0.992407	0.993344		0.1	0.15	0.25	0.75	2.5	0.979491	0.985544	0.974561	0.986378		0.9	0.6	1.05	0.45	2.5	0.953056	0.953511	0.952889	0.947159		1.8	0.45	0.1		2.5	0.915385	0.920828	0.914586
0.15	0.2	0.5	0.35	0.55	2.55	0.993719	0.995745	0.994448	0.994278	0.997754		0.65	0.9	0.65	0.25	2.55	0.98859	0.989179	0.993166	0.994176		0.2	0.2	0.1	0.1	2.55	0.979491	0.987245	0.977193	0.987981		0.8	1.2	1.7	1.1	2.55	0.953942	0.957468	0.954667	0.95015		1.1	1.95	1.1		2.55	0.917949	0.924482	0.914586
0.7	0.1	1.75	0.3	0.25	2.6	0.995115	0.997163	0.994448	0.994278	0.997754		0.15	0.15	0.4	0.3	2.6	0.98859	0.989179	0.993166	0.994176		0.3	0.25	0.6	0.55	2.6	0.980312	0.987245	0.97807	0.989583		0.15	0.15	0.55	0.9	2.6	0.956599	0.960435	0.956444	0.952144		0.4	1.3	0.75		2.6	0.925641	0.926918	0.919842
0.75	0.3	0.25	0.5	0.2	2.65	0.995115	0.997872	0.994448	0.994993	0.997754		0.25	1.4	0.25	0.65	2.65	0.989405	0.989179	0.994685	0.994176		0.1	1.1	0.1	0.2	2.65	0.981132	0.988095	0.978947	0.990385		0.4	0.2	1.15	0.65	2.65	0.95837	0.960435	0.958222	0.953141		3.4	0.9	3.05		2.65	0.926923	0.929354	0.923784
0.6	0.15	0.6	0.35	0.75	2.7	0.995115	0.997872	0.994448	0.994993	0.997754		0.35	0.8	0.5	0.1	2.7	0.989405	0.990983	0.995444	0.994176		0.9	0.1	0.2	0.4	2.7	0.981952	0.988946	0.978947	0.991186		0.3	0.5	0.9	0.15	2.7	0.959256	0.964392	0.960889	0.958126		1.2	0.35	1.3		2.7	0.930769	0.933009	0.929041
0.55	0.2	1.65	0.2	0.2	2.75	0.995813	0.997872	0.995142	0.994993	0.997754		0.75	1.35	0.35	1.15	2.75	0.989405	0.990983	0.996203	0.994176		0.75	0.25	0.35	0.65	2.75	0.983593	0.988946	0.979825	0.991186		0.9	0.5	0.3	0.1	2.75	0.962799	0.964392	0.961778	0.958126		0.25	3.8	0.1		2.75	0.934615	0.936663	0.936925
1.55	0.1	0.15	1	0.75	2.8	0.995813	0.997872	0.995836	0.994993	0.998503		0.7	0.45	0.1	0.1	2.8	0.991035	0.992786	0.996963	0.994176		0.2	0.1	0.2	0.8	2.8	0.985234	0.990646	0.979825	0.991987		0.2	0.15	0.55	0.1	2.8	0.966342	0.96637	0.964444	0.959123		1.9	1.6	1.1		2.8	0.934615	0.946407	0.936925
1	0.2	0.2	0.2	0.1	2.85	0.996511	0.997872	0.995836	0.994993	0.998503		0.15	0.25	0.1	0.5	2.85	0.992665	0.992786	0.996963	0.99584		0.75	0.7	0.9	0.1	2.85	0.986874	0.990646	0.981579	0.991987		0.4	0.85	0.2	0.2	2.85	0.968113	0.967359	0.966222	0.962114		1.15	1.85	0.1		2.85	0.937179	0.950061	0.940867
0.15	1.4	0.5	0.2	0.35	2.9	0.996511	0.997872	0.995836	0.995708	0.998503		0.1	0.75	1	0.4	2.9	0.992665	0.993688	0.996963	0.99584		1.05	0.1	2.55	0.2	2.9	0.988515	0.991497	0.983333	0.992788		0.1	1.7	0.25	0.7	2.9	0.968999	0.969337	0.968889	0.967099		0.1	0.6	0.75		2.9	0.939744	0.951279	0.942181
0.75	0.2	0.6	1.35	1.2	2.95	0.996511	0.997872	0.997224	0.995708	0.998503		0.35	0.5	0.1	0.8	2.95	0.99348	0.993688	0.997722	0.996672		0.15	0.2	0.1	0.15	2.95	0.988515	0.991497	0.985965	0.992788		0.15	0.2	2.25	2.85	2.95	0.969885	0.971316	0.970667	0.968096		0.1	1.25	0.15		2.95	0.942308	0.951279	0.946124
0.1	1	0.25	1	0.1	3	0.996511	0.998582	0.997224	0.997139	0.998503		0.1	0.45	0.25	0.65	3	0.99348	0.99459	0.997722	0.997504		0.45	0.1	0.9	0.4	3	0.988515	0.991497	0.985965	0.992788		0.2	0.1	1.6	1	3	0.970771	0.973294	0.971556	0.97009		0.85	1.15	0.2		3	0.946154	0.952497	0.947438
0.45	0.35	1.15	0.9	0.1	3.05	0.997209	0.998582	0.997224	0.997139	0.999251		1.35	0.1	0.2	0.15	3.05	0.99348	0.995491	0.997722	0.998336		0.2	1.05	0.15	0.6	3.05	0.988515	0.992347	0.987719	0.992788		0.25	0.1	1	1	3.05	0.973428	0.973294	0.973333	0.971087		0.85	1.1	1.2		3.05	0.95	0.954933	0.950066
0.2	0.15	0.35	0.45	0.3	3.1	0.997209	0.998582	0.997224	0.997139	0.999251		0.2	0.2	0.8	0.65	3.1	0.994295	0.996393	0.997722	0.998336		0.25	1.75	1.6	0.15	3.1	0.989336	0.992347	0.988596	0.99359		0.2	2.35	0.1	1.2	3.1	0.974314	0.975272	0.974222	0.971087		0.15	1.05	0.65		3.1	0.951282	0.959805	0.955322
0.7	0.15	0.7	0.1	1	3.15	0.997906	0.998582	0.997224	0.997139	0.999251		0.1	0.35	0.35	1.05	3.15	0.99511	0.996393	0.997722	0.999168		0.35	0.1	0.1	0.55	3.15	0.989336	0.994048	0.988596	0.994391		0.75	0.1	0.1	1	3.15	0.976085	0.97725	0.975111	0.973081		0.1	1.3	0.3		3.15	0.955128	0.959805	0.95795
0.3	0.25	0.15	0.1	0.25	3.2	0.997906	0.998582	0.997224	0.997139	0.999251		0.4	0.65	0.3	0.85	3.2	0.99511	0.996393	0.998481	0.999168		0.3	0.75	0.9	0.2	3.2	0.989336	0.994048	0.988596	0.994391		0.6	0.2	1.95	0.7	3.2	0.976085	0.978239	0.975111	0.978066		1.5	0.8	0.5		3.2	0.95641	0.962241	0.959264
0.25	0.7	0.2	0.15	1	3.25	0.997906	0.998582	0.997224	0.997139	0.999251		0.6	0.1	0.9	0.25	3.25	0.99511	0.996393	0.998481	0.999168		0.1	1.5	0.9	0.25	3.25	0.989336	0.994048	0.988596	0.994391		0.15	0.2	0.2	0.1	3.25	0.977857	0.979228	0.975111	0.978066		2.05	2.35	1.8		3.25	0.95641	0.962241	0.961892
0.35	0.2	0.25	0.35	0.4	3.3	0.998604	0.998582	0.997224	0.998569	0.999251		0.4	0.15	0.7	0.15	3.3	0.99511	0.996393	0.998481	0.999168		0.15	0.1	0.55	0.6	3.3	0.989336	0.994898	0.988596	0.995192		1.55	0.2	0.6	1.45	3.3	0.979628	0.980218	0.976	0.978066		2.6	0.2	0.1		3.3	0.957692	0.964677	0.963206
0.1	0.25	0.8	0.7	0.25	3.35	0.998604	0.998582	0.997224	0.998569	0.999251		0.15	1.1	0.35	0.1	3.35	0.99511	0.996393	0.998481	0.999168		1.55	0.25	1.45	0.1	3.35	0.989336	0.995748	0.988596	0.995994		2.75	0.3	0.15	2.35	3.35	0.980514	0.980218	0.977778	0.978066		1.3	2.8	0.65		3.35	0.958974	0.964677	0.965834
0.5	0.2	0.3	0.1	1.9	3.4	0.999302	0.999291	0.997918	0.999285	0.999251		0.9	0.35	0.5	0.5	3.4	0.99511	0.997295	0.998481	0.999168		1	0.2	0.4	1.5	3.4	0.989336	0.995748	0.988596	0.995994		0.5	0.2	1	0.2	3.4	0.981399	0.980218	0.978667	0.978066		1.55	1.65	1.45		3.4	0.961538	0.968331	0.968463
0.15	0.75	0.3	0.1	0.9	3.45	0.999302	0.999291	0.997918	0.999285	0.999251		0.7	0.45	1.3	0.4	3.45	0.99511	0.997295	0.998481	0.999168		0.45	0.65	0.9	1.4	3.45	0.990156	0.996599	0.989474	0.996795		0.1	2.05	0.35	0.6	3.45	0.982285	0.982196	0.978667	0.979063		0.15	2.2	0.15		3.45	0.964103	0.969549	0.968463
2.6	0.1	0.65	0.25	0.1	3.5	0.999302	0.999291	0.998612	0.999285	0.999251		0.95	1.2	0.5	0.3	3.5	0.99511	0.997295	0.998481	0.999168		0.25	0.75	2.5	0.1	3.5	0.990156	0.996599	0.990351	0.996795		0.15	0.5	0.65	0.3	3.5	0.983171	0.983185	0.980444	0.979063		4.3	2.8	0.95		3.5	0.964103	0.969549	0.969777
0.1	0.1	1.55	0.15	0.8	3.55	0.999302	0.999291	0.998612	0.999285	0.999251		0.45	0.65	0.35	0.7	3.55	0.99511	0.997295	0.998481	0.999168		1.75	0.1	1	1.2	3.55	0.990976	0.996599	0.991228	0.996795		0.1	0.5	0.3	1.15	3.55	0.983171	0.984174	0.983111	0.98006		0.35	0.95	1.7		3.55	0.964103	0.969549	0.969777
0.1	0.55	0.25	0.1	0.15	3.6	0.999302	0.999291	0.998612	0.999285	0.999251		1.55	0.25	0.35	0.85	3.6	0.99511	0.997295	0.998481	0.999168		0.1	0.3	0.65	0.25	3.6	0.990976	0.996599	0.992105	0.996795		0.75	0.25	0.3	0.15	3.6	0.984057	0.985163	0.983111	0.98006		2	0.15	1.35		3.6	0.964103	0.969549	0.971091
0.1	0.35	0.45	0.95	0.25	3.65	0.999302	0.999291	0.998612	0.999285	0.999251		0.1	0.1	1	0.45	3.65	0.995925	0.997295	0.998481	0.999168		0.65	0.6	0.2	0.1	3.65	0.992617	0.996599	0.992982	0.996795		0.25	1.2	0.1	0.2	3.65	0.984942	0.985163	0.984	0.982054		2.5	0.1	1.5		3.65	0.964103	0.969549	0.973719
0.2	0.25	0.15	0.2	0.25	3.7	0.999302	0.999291	0.998612	0.999285	0.999251		1.6	0.55	0.75	0.65	3.7	0.995925	0.997295	0.998481	0.999168		0.1	0.1	0.15	0.25	3.7	0.992617	0.996599	0.99386	0.997596		1.05	3.1	0.1	0.7	3.7	0.9876	0.985163	0.984889	0.982054		0.25	0.2	0.2		3.7	0.964103	0.970767	0.975033
0.3	0.25	0.45	0.3	0.35	3.75	0.999302	0.999291	0.998612	0.999285	0.999251		0.15	0.1	0.25	0.3	3.75	0.995925	0.997295	0.998481	0.999168		1.25	0.1	0.5	0.55	3.75	0.993437	0.996599	0.994737	0.997596		0.6	0.1	0.85	0.15	3.75	0.9876	0.986152	0.985778	0.985045		2	0.6	0.25		3.75	0.966667	0.973203	0.975033
0.15	0.25	0.45	0.35	0.15	3.8	0.999302	0.999291	0.998612	0.999285	0.999251		0.15	0.6	0.7	0.3	3.8	0.995925	0.997295	0.999241	0.999168		1.25	0.1	0.5	0.5	3.8	0.993437	0.996599	0.994737	0.998397		1.05	1.75	0.25	0.3	3.8	0.9876	0.986152	0.985778	0.985045		0.5	0.6	0.75		3.8	0.967949	0.976857	0.975033
0.75	0.35	0.85	0.6	1.05	3.85	0.999302	0.999291	0.998612	0.999285	0.999251		0.55	0.65	0.25	1.45	3.85	0.995925	0.998197	0.999241	0.999168		1.55	0.35	0.6	0.85	3.85	0.993437	0.996599	0.994737	0.998397		2.3	0.85	0.15	0.6	3.85	0.988485	0.987141	0.987556	0.987039		0.1	2.8	4		3.85	0.967949	0.978076	0.975033
0.2	0.6	0.4	0.1	0.15	3.9	0.999302	0.999291	0.998612	0.999285	0.999251		0.55	0.65	0.1	0.1	3.9	0.99674	0.998197	0.999241	0.999168		0.3	1	0.3	0.7	3.9	0.994258	0.996599	0.994737	0.998397		0.5	2.15	1.55	0.35	3.9	0.989371	0.987141	0.989333	0.988036		0.6	2.8	2.45		3.9	0.967949	0.980512	0.976347
0.1	0.3	0.15	0.25	0.6	3.95	0.999302	0.999291	0.998612	0.999285	0.999251		0.6	0.55	0.1	0.9	3.95	0.99674	0.998197	0.999241	0.999168		0.25	0.6	0.9	0.5	3.95	0.994258	0.996599	0.994737	0.998397		1.15	0.75	3	0.35	3.95	0.989371	0.987141	0.991111	0.988036		2.95	1.7	2.65		3.95	0.970513	0.98173	0.976347
1.5	1.3	0.5	0.3	0.9	4	0.999302	0.999291	0.998612	0.999285	0.999251		0.45	0.4	0.8	0.7	4	0.997555	0.999098	0.999241	0.999168		0.55	0.2	0.25	0.3	4	0.994258	0.997449	0.994737	0.999199		0.35	0.75	0.1	1.65	4	0.989371	0.987141	0.992	0.988036		0.3	2.8	1.15		4	0.970513	0.982948	0.977661
0.25	0.2	0.35	0.25	0.35	4.05	0.999302	0.999291	0.998612	0.999285	0.999251		0.3	0.15	0.25	0.95	4.05	0.997555	0.999098	0.999241	0.999168		0.55	0.85	0.95	0.7	4.05	0.995078	0.997449	0.994737	0.999199		0.2	0.2	0.3	0.1	4.05	0.989371	0.988131	0.992	0.989033		0.95	0.4	1.5		4.05	0.970513	0.982948	0.977661
0.15	0.2	0.65	0.55	0.3	4.1	0.999302	0.999291	0.998612	0.999285	0.999251		1.55	0.15	0.3	0.65	4.1	0.997555	0.999098	0.999241	0.999168		0.35	0.1	0.35	0.4	4.1	0.995078	0.997449	0.994737	1		0.45	3.45	1.15	0.3	4.1	0.990257	0.988131	0.992889	0.989033		5	0.1	1.15		4.1	0.971795	0.982948	0.977661
0.3	0.1	1.1	0.15	0.8	4.15	0.999302	0.999291	0.998612	0.999285	0.999251		0.5	0.35	0.55	0.4	4.15	0.997555	0.999098	0.999241	0.999168		0.3	0.15	0.55	0.3	4.15	0.995078	0.997449	0.994737	1		0.55	0.15	0.95	1.25	4.15	0.990257	0.988131	0.993778	0.989033		2.85	0.2	1.25		4.15	0.971795	0.982948	0.978975
0.15	1.75	0.7	0.25	0.15	4.2	0.999302	0.999291	0.999306	0.999285	0.999251		0.55	0.6	0.3	0.15	4.2	0.997555	0.999098	0.999241	0.999168		0.15	1.1	0.2	0.15	4.2	0.995078	0.997449	0.995614	1		0.6	0.6	0.2	0.15	4.2	0.991143	0.988131	0.993778	0.99003		1.9	0.6	3.05		4.2	0.973077	0.982948	0.980289
0.85	0.15	0.1	0.15	0.15	4.25	0.999302	0.999291	0.999306	0.999285	0.999251		0.2	0.35	0.3	0.35	4.25	0.997555	0.999098	0.999241	0.999168		0.15	0.2	0.15	0.15	4.25	0.995078	0.997449	0.995614	1		0.6	0.1	1.25	0.2	4.25	0.992914	0.990109	0.993778	0.991027		4.3	0.1	0.75		4.25	0.973077	0.982948	0.981603
0.5	0.35	0.8	0.25	1.25	4.3	0.999302	0.999291	0.999306	0.999285	0.999251		0.15	1.25	0.35	0.45	4.3	0.997555	0.999098	0.999241	0.999168		0.15	0.2	0.7	0.15	4.3	0.995078	0.997449	0.995614	1		0.8	0.1	1	0.45	4.3	0.9938	0.991098	0.993778	0.991027		0.9	0.4	0.75		4.3	0.975641	0.982948	0.982917
0.35	1.2	0.2	0.2	0.2	4.35	0.999302	1	0.999306	0.999285	0.999251		0.95	0.1	0.2	0.1	4.35	0.99837	0.999098	0.999241	0.999168		0.3	0.5	0.6	0.35	4.35	0.995078	0.997449	0.995614	1		0.4	0.75	0.3	1.45	4.35	0.9938	0.993076	0.994667	0.992024		0.75	1.05	0.45		4.35	0.976923	0.982948	0.982917
0.6	0.35	0.25	0.6	0.4	4.4	0.999302	1	0.999306	0.999285	0.999251		0.65	0.75	1.45	0.1	4.4	0.99837	0.999098	0.999241	0.999168		0.1	0.25	0.2	0.55	4.4	0.995078	0.997449	0.997368	1		0.75	0.35	0.15	1.1	4.4	0.9938	0.994065	0.995556	0.992024		0.6	1.7	0.55		4.4	0.979487	0.982948	0.984231
0.6	0.15	0.1	0.25	0.1	4.45	0.999302	1	0.999306	0.999285	0.999251		0.3	0.3	0.4	0.2	4.45	0.99837	0.999098	0.999241	0.999168		0.55	0.4	0.15	0.35	4.45	0.995898	0.997449	0.997368	1		0.95	0.15	0.35	0.1	4.45	0.9938	0.994065	0.996444	0.992024		2	0.25	0.4		4.45	0.979487	0.982948	0.985545
1.05	0.85	0.25	0.15	0.15	4.5	0.999302	1	0.999306	0.999285	0.999251		0.55	0.6	2.95	0.3	4.5	0.99837	0.999098	0.999241	0.999168		0.7	0.1	0.2	1.7	4.5	0.995898	0.997449	0.997368	1		0.1	0.3	0.7	0.85	4.5	0.994686	0.994065	0.996444	0.992024		0.6	0.5	0.45		4.5	0.979487	0.982948	0.985545
0.3	0.15	0.1	0.1	0.5	4.55	0.999302	1	0.999306	0.999285	0.999251		0.15	0.2	0.1	0.15	4.55	0.99837	0.999098	0.999241	0.999168		1	0.95	1.5	0.2	4.55	0.995898	0.997449	0.997368	1		2.25	0.2	0.2	0.15	4.55	0.994686	0.994065	0.997333	0.992024		0.15	1.1	1.25		4.55	0.979487	0.982948	0.985545
0.2	0.15	0.45	0.1	0.2	4.6	0.999302	1	0.999306	0.999285	0.999251		0.6	0.1	0.9	0.8	4.6	0.99837	0.999098	0.999241	0.999168		0.45	1	2.05	0.5	4.6	0.995898	0.997449	0.997368	1		0.65	0.3	0.6	0.5	4.6	0.994686	0.994065	0.998222	0.992024		2.75	0.2	0.25		4.6	0.979487	0.982948	0.986859
0.15	0.45	1.2	0.15	0.75	4.65	0.999302	1	0.999306	0.999285	0.999251		0.75	0.5	0.5	1	4.65	0.99837	0.999098	0.999241	0.999168		0.75	0.45	0.65	0.15	4.65	0.995898	0.997449	0.997368	1		0.45	0.55	0.6	0.25	4.65	0.994686	0.994065	0.998222	0.992024		0.6	0.5	0.6		4.65	0.979487	0.982948	0.986859
1.25	0.1	1.65	0.65	2	4.7	0.999302	1	0.999306	0.999285	0.999251		0.85	1	0.5	0.15	4.7	0.99837	0.999098	0.999241	0.999168		2.9	1.35	0.2	0.65	4.7	0.995898	0.997449	0.997368	1		1.3	0.85	4.1	0.45	4.7	0.996457	0.995054	0.998222	0.993021		0.3	0.25	0.6		4.7	0.979487	0.984166	0.986859
0.5	0.8	0.2	0.1	0.1	4.75	0.999302	1	0.999306	0.999285	0.999251		0.7	0.35	0.1	0.1	4.75	0.99837	0.999098	0.999241	0.999168		0.5	0.7	0.15	0.15	4.75	0.995898	0.997449	0.997368	1		0.15	0.15	0.8	0.1	4.75	0.996457	0.996044	0.998222	0.993021		0.1	0.25	1		4.75	0.979487	0.985384	0.986859
0.35	0.1	0.25	0.15	0.45	4.8	0.999302	1	0.999306	0.999285	0.999251		0.5	0.3	0.15	0.5	4.8	0.99837	0.999098	0.999241	0.999168		0.45	0.35	0.55	0.45	4.8	0.995898	0.997449	0.997368	1		0.6	0.3	0.65	0.4	4.8	0.996457	0.996044	0.998222	0.993021		1.6	0.25	3.4		4.8	0.979487	0.985384	0.986859
1.65	1	0.45	0.35	0.25	4.85	0.999302	1	0.999306	0.999285	0.999251		0.1	1.05	0.25	0.2	4.85	0.99837	0.999098	0.999241	0.999168		0.6	0.3	0.55	0.4	4.85	0.996719	0.997449	0.998246	1		0.5	0.1	0.3	0.75	4.85	0.996457	0.996044	0.998222	0.993021		0.45	0.35	0.15		4.85	0.979487	0.985384	0.986859
0.2	0.15	0.3	0.1	0.45	4.9	0.999302	1	0.999306	0.999285	0.999251		0.65	0.55	0.15	0.2	4.9	0.99837	0.999098	0.999241	0.999168		0.8	0.55	1.45	0.1	4.9	0.997539	0.997449	0.998246	1		0.25	0.8	1.25	0.1	4.9	0.996457	0.996044	0.998222	0.994018		0.2	1.05	0.7		4.9	0.979487	0.985384	0.986859
0.3	0.2	0.75	0.55	1.55	4.95	0.999302	1	0.999306	0.999285	0.999251		0.25	0.5	0.55	0.3	4.95	0.99837	0.999098	0.999241	0.999168		0.3	0.1	0.15	1.95	4.95	0.997539	0.997449	0.998246	1		0.4	0.4	0.2	0.2	4.95	0.996457	0.996044	0.998222	0.994018		0.1	0.3	1.1		4.95	0.979487	0.98782	0.986859
0.15	0.75	0.3	0.25	0.3	5	0.999302	1	0.999306	0.999285	0.999251		0.1	0.3	0.45	0.3	5	0.99837	0.999098	0.999241	0.999168		3.75	0.15	0.35	1	5	0.997539	0.997449	0.998246	1		0.25	0.5	1.05	0.1	5	0.996457	0.996044	0.998222	0.994018		2.1	6.9	0.45		5	0.982051	0.98782	0.986859
0.2	0.2	0.15	0.3	1.2	5.05	0.999302	1	0.999306	0.999285	0.999251		0.3	0.15	0.25	0.1	5.05	0.99837	0.999098	0.999241	0.999168		0.6	0.3	0.65	0.1	5.05	0.997539	0.997449	0.999123	1		0.5	0.8	0.2	0.15	5.05	0.996457	0.996044	0.999111	0.995015		0.8	2.7	0.7		5.05	0.982051	0.98782	0.988173
2.5	0.1	0.1	0.15	0.45	5.1	0.999302	1	0.999306	0.999285	0.999251		0.85	0.1	0.4	0.3	5.1	0.99837	0.999098	0.999241	0.999168		0.2	0.25	0.25	1.15	5.1	0.997539	0.997449	0.999123	1		0.6	0.2	0.75	0.3	5.1	0.996457	0.996044	0.999111	0.995015		0.15	1.2	0.15		5.1	0.983333	0.98782	0.988173
0.15	0.1	0.85	0.35	0.8	5.15	0.999302	1	0.999306	0.999285	0.999251		0.1	0.25	0.2	0.1	5.15	0.99837	0.999098	0.999241	0.999168		0.1	0.3	1.15	0.25	5.15	0.998359	0.997449	0.999123	1		0.85	1.15	0.75	0.4	5.15	0.996457	0.996044	0.999111	0.995015		1.35	2.85	2.75		5.15	0.983333	0.98782	0.989488
1.65	0.15	0.2	1.2	0.7	5.2	0.999302	1	0.999306	0.999285	0.999251		0.7	0.75	0.85	0.3	5.2	0.99837	0.999098	0.999241	0.999168		0.25	0.25	0.6	0.25	5.2	0.998359	0.997449	0.999123	1		0.5	0.75	0.45	1.05	5.2	0.997343	0.996044	0.999111	0.995015		0.3	2.45	4.45		5.2	0.983333	0.989038	0.989488
0.3	0.7	0.15	0.45	0.95	5.25	0.999302	1	0.999306	0.999285	0.999251		0.25	0.4	0.3	0.25	5.25	0.99837	0.999098	0.999241	0.999168		0.15	0.25	0.55	0.2	5.25	0.998359	0.997449	0.999123	1		2.15	1.95	2.9	0.8	5.25	0.997343	0.996044	0.999111	0.995015		2.2	2.8	0.25		5.25	0.984615	0.989038	0.990802
0.7	0.15	0.15	0.55	0.3	5.3	0.999302	1	0.999306	1	0.999251		0.1	0.4	0.7	0.1	5.3	0.99837	0.999098	0.999241	0.999168		0.15	1.15	0.15	0.3	5.3	0.998359	0.997449	0.999123	1		1.2	0.65	0.3	0.45	5.3	0.997343	0.996044	0.999111	0.995015		5.4	0.25	0.85		5.3	0.984615	0.989038	0.990802
0.1	0.2	0.15	0.5	2	5.35	0.999302	1	0.999306	1	0.999251		0.4	0.6	0.2	0.35	5.35	0.99837	0.999098	1	0.999168		0.8	0.15	0.8	1.9	5.35	0.998359	0.997449	0.999123	1		0.65	0.4	0.25	2.5	5.35	0.998229	0.996044	0.999111	0.995015		0.2	0.1	0.65		5.35	0.984615	0.990256	0.990802
0.2	0.1	0.25	0.5	0.5	5.4	0.999302	1	0.999306	1	0.999251		0.65	0.4	0.15	0.45	5.4	0.99837	0.999098	1	0.999168		0.75	1.45	0.3	0.45	5.4	0.998359	0.998299	0.999123	1		0.25	0.75	1.15	0.75	5.4	0.998229	0.996044	0.999111	0.995015		0.3	1.05	0.3		5.4	0.985897	0.991474	0.990802
0.55	0.15	0.3	0.5	0.3	5.45	0.999302	1	0.999306	1	0.999251		0.95	0.45	0.15	0.2	5.45	0.99837	0.999098	1	0.999168		0.3	0.85	1.55	0.15	5.45	0.998359	0.998299	0.999123	1		0.1	0.3	0.5	0.5	5.45	0.998229	0.996044	0.999111	0.996012		0.4	3.2	2.7		5.45	0.985897	0.991474	0.992116
0.15	0.3	0.6	0.3	1.4	5.5	0.999302	1	0.999306	1	0.999251		1.1	0.2	0.1	0.55	5.5	0.99837	1	1	0.999168		0.3	0.6	0.25	0.2	5.5	0.998359	0.998299	0.999123	1		0.4	0.3	0.25	0.5	5.5	0.998229	0.996044	0.999111	0.996012		0.6	3.1	1.1		5.5	0.985897	0.991474	0.992116
0.1	0.1	0.15	0.8	1.1	5.55	0.999302	1	0.999306	1	0.999251		0.1	0.1	0.4	0.75	5.55	0.99837	1	1	0.999168		0.25	0.75	0.3	0.85	5.55	0.998359	0.998299	0.999123	1		0.45	0.4	0.1	0.3	5.55	0.998229	0.996044	0.999111	0.996012		0.75	3.4	0.15		5.55	0.985897	0.992692	0.992116
0.45	1.15	0.25	0.15	1.45	5.6	0.999302	1	0.999306	1	0.999251		0.15	0.15	0.95	0.25	5.6	0.99837	1	1	0.999168		1.9	0.4	0.3	0.5	5.6	0.99918	0.99915	0.999123	1		0.15	0.65	0.1	0.1	5.6	0.999114	0.996044	0.999111	0.996012		0.4	2.3	0.7		5.6	0.985897	0.992692	0.992116
0.6	0.45	0.1	0.1	0.15	5.65	0.999302	1	0.999306	1	0.999251		0.45	0.55	0.15	1.4	5.65	0.99837	1	1	0.999168		0.5	0.1	2.15	0.2	5.65	0.99918	0.99915	0.999123	1		1	0.15	0.25	0.1	5.65	0.999114	0.996044	0.999111	0.997009		0.1	0.2	0.15		5.65	0.985897	0.992692	0.992116
0.1	0.15	0.6	0.8	0.2	5.7	0.999302	1	0.999306	1	0.999251		0.3	0.75	0.2	0.2	5.7	0.99837	1	1	0.999168		0.5	0.25	0.25	0.3	5.7	0.99918	0.99915	0.999123	1		0.4	2.2	0.8	1.15	5.7	0.999114	0.996044	0.999111	0.997009		0.55	0.65	0.4		5.7	0.987179	0.992692	0.992116
0.95	0.2	0.25	0.2	0.9	5.75	0.999302	1	0.999306	1	0.999251		1.35	0.15	0.4	1.85	5.75	0.99837	1	1	0.999168		0.25	0.65	0.4	1.35	5.75	0.99918	0.99915	0.999123	1		0.2	1.2	0.5	0.85	5.75	0.999114	0.996044	0.999111	0.997009		0.8	2.8	0.8		5.75	0.987179	0.992692	0.992116
0.2	0.25	0.25	0.1	0.2	5.8	0.999302	1	0.999306	1	0.999251		2.4	0.7	0.2	0.1	5.8	0.99837	1	1	0.999168		0.95	0.15	0.25	0.2	5.8	0.99918	0.99915	0.999123	1		3.05	0.6	0.9	1.3	5.8	0.999114	0.996044	0.999111	0.997009		10.2	1.05	0.3		5.8	0.988462	0.992692	0.992116
0.2	0.15	0.25	0.85	0.45	5.85	0.999302	1	0.999306	1	0.999251		0.2	0.4	0.15	0.3	5.85	0.99837	1	1	0.999168		0.2	0.5	0.15	0.25	5.85	0.99918	0.99915	0.999123	1		1	0.45	1.9	0.3	5.85	0.999114	0.996044	0.999111	0.997009		0.8	0.8	1.3		5.85	0.988462	0.992692	0.992116
1.95	0.35	1.45	0.35	0.1	5.9	0.999302	1	0.999306	1	0.999251		0.1	5.5	0.1	0.2	5.9	0.99837	1	1	0.999168		0.1	2.65	0.2	1.5	5.9	0.99918	0.99915	0.999123	1		0.1	0.25	0.4	0.5	5.9	0.999114	0.996044	0.999111	0.997009		1.25	0.85	0.1		5.9	0.988462	0.992692	0.992116
0.15	0.35	0.95	0.25	0.55	5.95	0.999302	1	0.999306	1	0.999251		0.6	0.35	0.4	1.55	5.95	0.99837	1	1	0.999168		0.1	0.3	0.45	0.55	5.95	0.99918	0.99915	0.999123	1		1	0.1	1	0.15	5.95	0.999114	0.996044	0.999111	0.997009		0.55	0.6	1.35		5.95	0.989744	0.992692	0.99343
0.3	0.4	0.2	0.4	0.15	6	0.999302	1	0.999306	1	0.999251		0.6	0.25	0.25	0.15	6	0.99837	1	1	1		0.1	0.25	0.6	0.35	6	0.99918	0.99915	0.999123	1		0.65	0.7	0.35	0.5	6	0.999114	0.996044	0.999111	0.998006		1.25	0.2	0.7		6	0.991026	0.992692	0.99343
0.45	0.2	0.65	0.4	0.1	6.05	0.999302	1	0.999306	1	0.999251		0.2	0.35	0.4	0.75	6.05	0.99837	1	1	1		0.2	0.95	1.7	0.4	6.05	0.99918	0.99915	0.999123	1		0.8	0.2	0.45	1.3	6.05	0.999114	0.997033	0.999111	0.998006		0.9	0.4	3.35		6.05	0.991026	0.992692	0.99343
0.35	0.55	1.05	0.15	0.25	6.1	0.999302	1	0.999306	1	0.999251		0.6	0.75	0.1	0.3	6.1	0.99837	1	1	1		0.65	0.15	0.8	0.8	6.1	0.99918	0.99915	0.999123	1		0.35	0.55	0.2	0.25	6.1	0.999114	0.997033	0.999111	0.998006		1.45	0.8	2.2		6.1	0.992308	0.992692	0.99343
0.35	0.65	0.15	0.35	0.2	6.15	0.999302	1	0.999306	1	0.999251		0.5	0.1	0.1	0.45	6.15	0.99837	1	1	1		0.65	0.55	0.3	0.55	6.15	0.99918	0.99915	1	1		0.1	0.1	2.45	0.3	6.15	0.999114	0.998022	0.999111	0.998006		0.65	1.15	0.5		6.15	0.992308	0.99391	0.99343
0.9	0.6	1.2	0.35	0.25	6.2	0.999302	1	0.999306	1	0.999251		0.25	0.35	0.2	0.55	6.2	0.99837	1	1	1		0.3	0.95	0.15	0.9	6.2	0.99918	0.99915	1	1		0.35	0.65	1.05	0.25	6.2	0.999114	0.998022	0.999111	0.998006		0.15	2.55	0.2		6.2	0.992308	0.99391	0.99343
0.5	0.75	0.15	0.15	0.15	6.25	0.999302	1	0.999306	1	0.999251		1.45	0.3	0.45	0.7	6.25	0.99837	1	1	1		0.75	0.65	0.15	0.15	6.25	0.99918	0.99915	1	1		0.3	2.8	0.25	0.15	6.25	0.999114	0.998022	0.999111	0.998006		0.6	0.1	0.15		6.25	0.992308	0.99391	0.99343
0.8	0.45	1.85	0.25	0.2	6.3	0.999302	1	0.999306	1	0.999251		0.25	0.1	0.6	0.25	6.3	0.99837	1	1	1		0.25	1.4	1.3	0.3	6.3	0.99918	0.99915	1	1		0.35	1.85	0.8	2.6	6.3	0.999114	0.998022	0.999111	0.998006		1.05	1.7	1		6.3	0.992308	0.995128	0.99343
0.9	0.15	1	0.6	0.15	6.35	0.999302	1	0.999306	1	0.999251		0.4	0.25	0.3	0.25	6.35	0.99837	1	1	1		0.85	0.7	0.15	0.5	6.35	0.99918	1	1	1		0.7	0.1	1.05	0.5	6.35	0.999114	0.998022	0.999111	0.998006		0.8	0.2	1.05		6.35	0.992308	0.995128	0.994744
0.1	1.25	0.3	0.1	0.1	6.4	0.999302	1	0.999306	1	0.999251		1.15	1.05	0.1	0.4	6.4	0.99837	1	1	1		0.95	0.4	0.6	0.2	6.4	0.99918	1	1	1		0.2	2.95	0.2	0.6	6.4	0.999114	0.998022	0.999111	0.998006		0.8	2.75	0.35		6.4	0.992308	0.995128	0.994744
1.1	0.6	1.25	0.2	2.8	6.45	0.999302	1	0.999306	1	0.999251		1.45	1.05	0.15	0.1	6.45	0.99837	1	1	1		0.1	1.2	0.35	0.9	6.45	0.99918	1	1	1		1.3	0.8	0.5	1.05	6.45	0.999114	0.998022	0.999111	0.998006		0.5	0.7	0.5		6.45	0.992308	0.995128	0.994744
0.25	0.1	0.35	0.5	0.35	6.5	0.999302	1	0.999306	1	0.999251		0.75	0.1	0.6	0.35	6.5	0.99837	1	1	1		1	0.75	0.35	0.45	6.5	0.99918	1	1	1		0.25	0.5	0.65	0.15	6.5	0.999114	0.998022	0.999111	0.998006		1.85	1.45	0.75		6.5	0.992308	0.996346	0.994744
0.3	0.15	0.1	1.5	0.35	6.55	0.999302	1	0.999306	1	0.999251		0.7	0.15	0.1	0.25	6.55	0.99837	1	1	1		0.95	0.65	0.7	0.8	6.55	0.99918	1	1	1		0.45	0.65	0.4	2	6.55	0.999114	0.998022	0.999111	0.998006		0.35	0.4	0.7		6.55	0.992308	0.996346	0.994744
0.6	0.1	0.35	0.2	0.85	6.6	1	1	0.999306	1	0.999251		0.1	0.65	0.35	0.35	6.6	0.99837	1	1	1		0.25	0.3	0.65	0.15	6.6	0.99918	1	1	1		4.2	0.6	0.15	0.15	6.6	0.999114	0.998022	0.999111	0.998006		0.65	0.35	0.65		6.6	0.992308	0.996346	0.994744
0.85	0.75	0.55	0.15	0.1	6.65	1	1	0.999306	1	0.999251		1.8	0.45	0.2	0.25	6.65	0.99837	1	1	1		0.35	1.25	0.25	0.2	6.65	0.99918	1	1	1		0.25	0.9	0.75	0.5	6.65	0.999114	0.998022	0.999111	0.998006		0.85	1.15	1.2		6.65	0.992308	0.996346	0.994744
0.25	0.2	1.15	0.15	0.6	6.7	1	1	0.999306	1	0.999251		0.6	0.75	0.9	0.4	6.7	0.99837	1	1	1		0.55	0.2	0.25	0.3	6.7	0.99918	1	1	1		0.7	1.3	1.65	0.4	6.7	0.999114	0.998022	1	0.998006		0.8	0.1	0.6		6.7	0.992308	0.996346	0.994744
0.6	0.45	0.1	0.15	0.5	6.75	1	1	0.999306	1	0.999251		0.15	0.2	0.25	0.5	6.75	0.99837	1	1	1		0.1	1.25	0.45	0.95	6.75	0.99918	1	1	1		0.1	0.3	0.2	0.3	6.75	0.999114	0.998022	1	0.998006		0.15	1.6	0.45		6.75	0.992308	0.996346	0.994744
0.45	0.1	0.6	0.6	0.2	6.8	1	1	0.999306	1	0.999251		1.85	1	0.2	0.55	6.8	0.99837	1	1	1		0.1	0.3	1	0.1	6.8	0.99918	1	1	1		4.1	1.85	0.35	4.25	6.8	0.999114	0.998022	1	0.998006		0.1	1.65	0.2		6.8	0.992308	0.996346	0.994744
0.85	0.95	0.1	0.25	0.45	6.85	1	1	0.999306	1	0.999251		0.35	0.25	0.15	0.45	6.85	0.99837	1	1	1		1.2	0.3	0.25	0.9	6.85	0.99918	1	1	1		0.3	0.4	0.95	0.2	6.85	0.999114	0.998022	1	0.998006		0.75	3.75	3.1		6.85	0.992308	0.996346	0.994744
0.35	0.45	0.15	0.9	0.1	6.9	1	1	0.999306	1	0.999251		1.75	0.2	0.25	0.35	6.9	0.99837	1	1	1		0.1	0.15	0.55	0.5	6.9	0.99918	1	1	1		0.9	0.3	1.75	0.55	6.9	0.999114	0.998022	1	0.998006		2.6	1.6	1.75		6.9	0.992308	0.997564	0.994744
0.4	0.7	0.2	0.3	0.8	6.95	1	1	0.999306	1	0.999251		0.15	1.6	0.25	0.4	6.95	0.99837	1	1	1		0.1	0.4	0.6	0.6	6.95	0.99918	1	1	1		0.25	0.5	1.45	0.35	6.95	0.999114	0.998022	1	0.998006		0.2	2.15	0.1		6.95	0.992308	0.997564	0.994744
0.1	0.2	1.15	0.5	0.15	7	1	1	0.999306	1	0.999251		0.25	0.15	1.1	0.1	7	0.99837	1	1	1		0.15	0.35	0.2	0.3	7	0.99918	1	1	1		0.45	1.2	0.35	0.3	7	0.999114	0.998022	1	0.998006		0.15	0.75	1.05		7	0.992308	0.997564	0.994744
0.1	1.2	0.1	0.55	0.2	7.05	1	1	0.999306	1	0.999251		0.95	0.85	0.35	0.7	7.05	0.99837	1	1	1		0.7	0.4	1	1	7.05	0.99918	1	1	1		0.15	1.55	2.9	1.75	7.05	0.999114	0.998022	1	0.998006		0.15	3.95	0.65		7.05	0.99359	0.997564	0.996058
0.9	0.1	0.1	1.65	0.1	7.1	1	1	0.999306	1	0.999251		0.2	1.5	0.4	0.15	7.1	0.99837	1	1	1		0.15	0.8	0.15	0.5	7.1	0.99918	1	1	1		0.85	0.6	0.55	0.1	7.1	0.999114	0.998022	1	0.998006		4.4	0.1	2.85		7.1	0.99359	0.997564	0.996058
0.1	0.6	0.55	0.55	0.6	7.15	1	1	0.999306	1	0.999251		0.15	0.8	0.5	0.3	7.15	0.99837	1	1	1		0.5	0.3	1.2	0.25	7.15	0.99918	1	1	1		1.4	0.1	2	0.9	7.15	0.999114	0.998022	1	0.998006		3.15	0.25	0.8		7.15	0.99359	0.997564	0.996058
0.5	0.8	0.6	0.65	0.45	7.2	1	1	0.999306	1	0.999251		0.45	0.1	1.05	0.55	7.2	0.99837	1	1	1		0.65	0.35	0.1	1.95	7.2	0.99918	1	1	1		1.35	3.5	0.7	0.15	7.2	0.999114	0.998022	1	0.998006		5.1	1.05	1.45		7.2	0.99359	0.998782	0.996058
0.45	0.1	0.1	0.9	1.35	7.25	1	1	0.999306	1	0.999251		0.25	0.55	0.25	0.6	7.25	0.99837	1	1	1		2.65	0.2	0.3	0.7	7.25	0.99918	1	1	1		0.65	0.15	0.8	1	7.25	0.999114	0.998022	1	0.998006		1.75	0.4	2.35		7.25	0.99359	0.998782	0.996058
0.15	0.5	0.2	0.25	0.2	7.3	1	1	0.999306	1	0.999251		0.9	0.55	0.9	0.8	7.3	0.99837	1	1	1		0.1	0.2	0.15	0.1	7.3	0.99918	1	1	1		1.2	0.1	0.1	0.8	7.3	0.999114	0.998022	1	0.998006		0.7	0.35	2.45		7.3	0.99359	0.998782	0.996058
0.25	0.9	0.35	0.35	0.9	7.35	1	1	0.999306	1	0.999251		0.45	0.8	0.35	0.3	7.35	0.99837	1	1	1		1.25	0.1	0.7	0.3	7.35	0.99918	1	1	1		0.15	1.5	1	0.1	7.35	0.999114	0.998022	1	0.998006		0.7	0.85	0.5		7.35	0.99359	0.998782	0.996058
0.45	0.3	0.4	0.25	0.35	7.4	1	1	0.999306	1	0.999251		0.45	0.35	0.8	0.7	7.4	0.99837	1	1	1		1.2	1.6	0.25	0.45	7.4	0.99918	1	1	1		0.1	2	0.1	0.15	7.4	0.999114	0.998022	1	0.998006		1.3	1.45	0.25		7.4	0.99359	0.998782	0.996058
0.45	0.85	1	0.6	0.45	7.45	1	1	0.999306	1	0.999251		0.85	0.15	0.45	0.15	7.45	0.99837	1	1	1		1.05	0.15	0.1	0.6	7.45	0.99918	1	1	1		0.4	0.35	1.05	3.75	7.45	0.999114	0.998022	1	0.998006		0.45	0.1	0.25		7.45	0.99359	0.998782	0.996058
0.15	0.45	0.35	0.55	0.3	7.5	1	1	0.999306	1	0.999251		1.05	0.2	0.2	0.2	7.5	0.99837	1	1	1		4.9	0.55	1.1	0.1	7.5	0.99918	1	1	1		0.2	0.45	0.15	0.85	7.5	0.999114	0.998022	1	0.999003		0.45	0.4	0.3		7.5	0.99359	0.998782	0.996058
1.4	0.4	0.35	0.85	1.45	7.55	1	1	0.999306	1	0.999251		1.15	0.25	0.1	0.9	7.55	0.99837	1	1	1		0.65	0.1	1	0.4	7.55	0.99918	1	1	1		0.85	0.3	0.7	0.3	7.55	0.999114	0.998022	1	0.999003		1.3	0.75	0.95		7.55	0.99359	0.998782	0.996058
0.1	0.7	0.35	0.15	0.1	7.6	1	1	0.999306	1	0.999251		0.4	0.5	0.7	1.75	7.6	0.99837	1	1	1		0.65	0.2	4.4	0.6	7.6	0.99918	1	1	1		0.2	0.2	0.75	0.25	7.6	0.999114	0.998022	1	0.999003		0.4	0.5	0.65		7.6	0.99359	0.998782	0.996058
0.85	0.65	0.4	0.2	0.3	7.65	1	1	0.999306	1	0.999251		1.25	0.4	0.4	0.35	7.65	0.99837	1	1	1		1.95	0.2	0.65	0.45	7.65	0.99918	1	1	1		0.2	1.1	4	2.15	7.65	0.999114	0.998022	1	0.999003		2.6	6.15	0.8		7.65	0.99359	0.998782	0.996058
0.1	0.1	0.1	0.15	0.7	7.7	1	1	0.999306	1	0.999251		1.1	0.3	0.1	0.35	7.7	0.99837	1	1	1		0.55	0.1	0.55	0.85	7.7	0.99918	1	1	1		0.6	0.3	1.65	1.4	7.7	0.999114	0.998022	1	0.999003		0.5	1.3	0.75		7.7	0.99359	0.998782	0.996058
1.35	0.3	0.2	0.65	0.45	7.75	1	1	0.999306	1	0.999251		0.15	0.85	0.35	1.35	7.75	0.99837	1	1	1		0.1	2.5	0.3	0.75	7.75	0.99918	1	1	1		0.75	1.5	0.35	0.85	7.75	0.999114	0.998022	1	0.999003		1.05	1.8	0.1		7.75	0.99359	0.998782	0.996058
0.8	1.15	0.1	1.15	0.1	7.8	1	1	0.999306	1	0.999251		0.3	0.35	0.15	0.2	7.8	0.99837	1	1	1		1.8	0.3	1.5	1	7.8	0.99918	1	1	1		2.65	0.15	0.3	1.5	7.8	0.999114	0.998022	1	0.999003		0.2	2.75	2.05		7.8	0.99359	0.998782	0.996058
0.25	0.2	0.15	0.55	0.15	7.85	1	1	0.999306	1	1		0.15	0.3	0.1	0.25	7.85	0.99837	1	1	1		0.6	0.25	0.55	3.3	7.85	1	1	1	1		0.4	0.2	0.25	0.7	7.85	0.999114	0.998022	1	0.999003		0.45	1.4	1.15		7.85	0.99359	0.998782	0.996058
1.75	0.35	0.25	0.95	0.25	7.9	1	1	0.999306	1	1		0.1	0.4	0.1	0.1	7.9	0.99837	1	1	1		0.35	0.3	0.4	0.35							0.2	0.35	0.15	2.9	7.9	0.999114	0.998022	1	0.999003		0.2	0.9	0.3		7.9	0.99359	0.998782	0.997372
1.9	0.7	0.15	0.2	0.35	7.95	1	1	0.999306	1	1		0.5	0.25	0.7	0.6	7.95	0.99837	1	1	1		1.2	1.35	0.25	1.05							0.3	0.35	0.2	0.3	7.95	0.999114	0.998022	1	0.999003		0.2	0.3	0.95		7.95	0.99359	0.998782	0.997372
0.2	0.2	1.6	0.35	0.2	8	1	1	0.999306	1	1		0.15	0.85	0.3	0.15	8	0.99837	1	1	1		0.45	1.65	0.45	0.1							5.2	0.35	0.6	1	8	0.999114	0.998022	1	0.999003		0.8	2.55	0.15		8	0.994872	0.998782	0.997372
0.45	0.1	0.65	0.25	0.6	8.05	1	1	0.999306	1	1		0.2	0.3	0.2	0.1	8.05	0.99837	1	1	1		0.95	0.45	0.1	0.5							0.6	1.5	0.35	0.8	8.05	0.999114	0.998022	1	0.999003		0.7	0.35	2.15		8.05	0.994872	0.998782	0.997372
0.15	0.5	0.8	0.15	1	8.1	1	1	0.999306	1	1		0.65	0.1	1.35	0.2	8.1	0.99837	1	1	1		0.55	0.5	1.95	0.1							1.7	0.25	4.6	0.1	8.1	0.999114	0.998022	1	0.999003		1.15	0.3	0.2		8.1	0.994872	0.998782	0.997372
0.4	0.15	0.3	0.3	0.1	8.15	1	1	0.999306	1	1		1.95	0.45	0.3	0.65	8.15	0.99837	1	1	1		0.15	1.3	1.65	0.3							0.95	0.4	0.85	2.25	8.15	0.999114	0.998022	1	0.999003		1.55	0.5	0.45		8.15	0.994872	0.998782	0.997372
0.4	0.35	0.2	0.2	0.1	8.2	1	1	0.999306	1	1		0.8	0.35	0.8	0.25	8.2	0.99837	1	1	1		0.6	0.1	0.45	0.3							1	1.25	0.3	0.4	8.2	0.999114	0.998022	1	0.999003		0.25	0.45	0.15		8.2	0.996154	0.998782	0.997372
0.7	0.9	1.15	0.7	0.2	8.25	1	1	0.999306	1	1		0.15	1.35	0.7	0.1	8.25	0.99837	1	1	1		0.95	0.1	1.4	0.1							2.85	0.2	0.1	0.2	8.25	0.999114	0.998022	1	0.999003		1.25	0.45	0.25		8.25	0.996154	0.998782	0.997372
0.1	0.15	0.25	0.1	0.15	8.3	1	1	0.999306	1	1		0.1	0.6	0.4	0.6	8.3	0.999185	1	1	1		0.1	1.45	0.2	0.1							0.2	0.65	0.2	1.3	8.3	0.999114	0.998022	1	0.999003		1.05	0.4	0.3		8.3	0.996154	0.998782	0.997372
0.4	2.65	1.5	0.4	0.1	8.35	1	1	0.999306	1	1		0.25	0.15	0.2	0.3	8.35	0.999185	1	1	1		0.4	0.9	0.9	0.7							0.3	0.35	1.55	0.95	8.35	0.999114	0.998022	1	0.999003		2.3	1.75	0.6		8.35	0.996154	0.998782	0.997372
0.3	0.35	0.45	0.4	0.25	8.4	1	1	0.999306	1	1		0.6	0.6	0.2	0.95	8.4	0.999185	1	1	1		0.1	0.3	0.1	0.1							0.25	1.25	0.35	0.25	8.4	0.999114	0.998022	1	0.999003		1.4	0.1	0.8		8.4	0.996154	0.998782	0.997372
0.1	0.55	1	0.35	0.45	8.45	1	1	1	1	1		0.85	0.25	0.85	0.45	8.45	0.999185	1	1	1		0.65	0.65	0.15	0.1							2.15	0.35	6.7	0.3	8.45	0.999114	0.998022	1	0.999003		1.85	0.1	0.55		8.45	0.996154	0.998782	0.997372
0.3	0.15	1.45	0.1	0.9								1.25	0.6	0.15	0.4	8.5	0.999185	1	1	1		0.1	0.6	0.55	1.35							0.65	0.15	2.1	0.4	8.5	0.999114	0.998022	1	0.999003		0.1	0.45	1.55		8.5	0.996154	0.998782	0.997372
0.1	0.25	0.1	0.6	0.5								1.3	0.3	0.45	0.4	8.55	0.999185	1	1	1		0.6	1.8	0.6	1.25							0.75	1.65	0.35	4.05	8.55	0.999114	0.998022	1	0.999003		0.85	0.3	0.7		8.55	0.996154	0.998782	0.997372
0.55	0.1	1.1	2.05	0.7								0.2	0.85	0.2	0.4	8.6	0.999185	1	1	1		0.1	0.75	0.5	2.05							0.6	0.3	0.75	0.35	8.6	0.999114	0.998022	1	0.999003		2.7	0.35	0.8		8.6	0.996154	0.998782	0.997372
0.65	0.2	0.6	0.3	0.4								0.3	0.25	0.1	0.25	8.65	0.999185	1	1	1		0.2	0.4	0.7	1							3.3	0.2	0.35	0.15	8.65	0.999114	0.998022	1	0.999003		1.45	0.35	0.45		8.65	0.996154	0.998782	0.997372
0.2	0.85	0.3	0.3	0.9								0.1	0.45	1.6	0.8	8.7	0.999185	1	1	1		1.1	0.15	0.1	0.6							0.3	0.15	1.65	0.6	8.7	0.999114	0.998022	1	0.999003		0.5	0.2	1.35		8.7	0.996154	0.998782	0.997372
0.1	0.15	0.2	0.5	0.15								0.15	0.1	1.05	0.15	8.75	0.999185	1	1	1		0.25	0.55	0.25	0.55							0.5	0.1	0.45	0.5	8.75	0.999114	0.998022	1	0.999003		0.15	3.85	1.15		8.75	0.996154	0.998782	0.997372
0.3	0.15	0.2	0.1	0.35								0.1	0.45	0.45	0.35	8.8	0.999185	1	1	1		0.35	0.7	0.4	1							1.65	0.75	0.25	0.3	8.8	0.999114	0.998022	1	0.999003		2.4	0.45	0.8		8.8	0.996154	0.998782	0.997372
0.7	0.25	0.35	0.9	0.1								0.15	0.1	0.65	0.15	8.85	0.999185	1	1	1		0.25	0.45	0.95	0.45							0.45	0.2	3.35	0.8	8.85	0.999114	0.998022	1	0.999003		0.7	1.25	0.9		8.85	0.996154	0.998782	0.997372
0.25	0.35	0.1	0.25	0.2								0.5	0.75	0.25	0.35	8.9	0.999185	1	1	1		0.2	0.8	1	0.5							0.1	0.55	0.85	1.7	8.9	0.999114	0.998022	1	0.999003		0.9	0.2	0.6		8.9	0.997436	0.998782	0.997372
0.55	0.15	0.8	0.1	0.5								0.35	0.1	0.7	0.2	8.95	0.999185	1	1	1		0.6	0.15	0.25	0.25							0.25	1.2	0.4	0.35	8.95	0.999114	0.998022	1	0.999003		0.3	0.75	0.25		8.95	0.997436	0.998782	0.997372
1.5	0.25	0.2	0.95	0.3								2.45	0.1	0.1	1.05	9	0.999185	1	1	1		0.25	0.15	0.3	0.1							0.2	0.5	0.45	1.9	9	0.999114	0.998022	1	0.999003		0.65	0.55	1.6		9	0.997436	1	0.997372
0.3	0.75	0.2	0.15	0.25								0.1	0.2	0.15	0.5	9.05	0.999185	1	1	1		0.35	1	0.7	0.45							0.1	0.15	0.3	0.2	9.05	0.999114	0.998022	1	0.999003		1.45	0.35	0.2		9.05	0.997436	1	0.997372
0.1	0.15	0.35	0.7	0.3								1.4	0.75	0.45	0.1	9.1	0.999185	1	1	1		1.6	0.15	0.95	0.65							0.55	0.65	0.25	0.4	9.1	0.999114	0.999011	1	0.999003		0.15	0.65	1.75		9.1	0.997436	1	0.997372
0.95	0.45	0.25	0.35	0.55								0.2	0.1	0.1	0.5	9.15	0.999185	1	1	1		0.15	0.25	0.25	0.45							0.3	0.85	0.65	0.95	9.15	0.999114	0.999011	1	0.999003		0.6	0.9	0.5		9.15	0.997436	1	0.997372
0.95	1	0.45	0.8	0.65								1.05	0.1	0.3	0.5	9.2	0.999185	1	1	1		0.1	0.95	1.8	1.2							1.25	0.1	0.8	3.85	9.2	0.999114	0.999011	1	0.999003		0.8	3.05	0.3		9.2	0.997436	1	0.997372
0.1	0.35	0.1	0.55	0.55								0.3	0.7	0.25	0.8	9.25	0.999185	1	1	1		0.15	0.45	0.2	0.15							1.05	0.85	1.75	0.45	9.25	0.999114	0.999011	1	0.999003		1.5	0.6	0.95		9.25	0.997436	1	0.997372
0.1	0.5	0.1	0.6	0.55								0.25	0.15	0.55	0.5	9.3	0.999185	1	1	1		2.1	1.05	0.3	0.6							2.7	2.15	0.25	2.35	9.3	0.999114	0.999011	1	0.999003		0.8	0.4	0.3		9.3	0.998718	1	0.997372
0.85	1.25	0.4	0.1	0.3								0.45	0.2	0.45	2	9.35	0.999185	1	1	1		0.3	0.45	0.15	0.4							0.1	0.55	1.7	0.25	9.35	0.999114	0.999011	1	0.999003		0.4	0.9	1.1		9.35	0.998718	1	0.998686
0.2	0.2	0.85	0.55	0.45								0.25	0.9	0.75	1.9	9.4	0.999185	1	1	1		0.4	0.2	0.15	0.1							0.7	0.4	1	0.25	9.4	0.999114	0.999011	1	0.999003		0.5	0.65	0.35		9.4	0.998718	1	1
0.2	0.8	0.1	0.4	0.55								0.8	1.55	0.15	0.2	9.45	0.999185	1	1	1		0.1	0.95	2.05	0.3							0.8	0.45	0.4	0.5	9.45	0.999114	0.999011	1	0.999003		1.5	0.2	1.55		9.45	0.998718	1	1
0.15	2	0.35	0.25	1.4								1	1.3	0.5	0.25	9.5	0.999185	1	1	1		0.7	0.9	0.1	0.6							0.1	0.1	0.35	0.6	9.5	0.999114	0.999011	1	0.999003		0.15	0.8	0.6		9.5	0.998718	1	1
1.2	0.35	0.25	0.4	0.1								0.7	1.2	0.7	0.75	9.55	0.999185	1	1	1		0.85	0.25	0.4	1.25							0.75	0.4	0.25	1.8	9.55	0.999114	0.999011	1	0.999003		0.35	0.95	0.25		9.55	0.998718	1	1
1.85	0.1	0.25	0.25	0.55								0.25	2.35	1.6	0.7	9.6	0.999185	1	1	1		0.65	0.25	1.35	0.25							0.35	0.35	2.35	0.4	9.6	0.999114	0.999011	1	0.999003		0.45	1.1	5.15		9.6	0.998718	1	1
2.15	0.2	0.45	0.15	0.9								0.2	0.15	0.7	0.2	9.65	0.999185	1	1	1		0.2	0.6	0.4	0.7							0.35	0.2	0.7	0.2	9.65	0.999114	0.999011	1	0.999003		1.2	1	0.6		9.65	0.998718	1	1
0.7	0.45	0.35	0.1	0.5								0.1	0.2	0.85	0.15	9.7	0.999185	1	1	1		0.2	0.1	0.5	0.1							0.95	0.45	0.35	0.55	9.7	0.999114	0.999011	1	0.999003		0.6	0.65	0.9		9.7	0.998718	1	1
0.1	0.55	0.8	2.5	0.15								0.55	0.25	0.5	1.2	9.75	0.999185	1	1	1		0.2	1.75	3.55	1.6							0.2	1.3	1.1	0.9	9.75	0.999114	0.999011	1	0.999003		0.15	0.3	0.3		9.75	0.998718	1	1
0.15	0.1	0.45	0.15	0.75								0.25	1.15	0.75	0.3	9.8	0.999185	1	1	1		0.35	0.25	0.4	0.2							1	1.2	0.95	0.25	9.8	0.999114	0.999011	1	0.999003		0.45	0.95	0.9		9.8	0.998718	1	1
0.3	1.75	0.55	0.2	0.1								0.1	0.25	0.2	0.3	9.85	0.999185	1	1	1		0.35	0.7	0.55	1.05							1.35	1.45	0.2	1	9.85	0.999114	0.999011	1	0.999003		0.4	1.15	0.1		9.85	0.998718	1	1
0.35	0.3	0.3	0.25	0.1								1.55	0.3	0.3	0.45	9.9	0.999185	1	1	1		0.25	0.9	0.15	0.85							0.3	2.45	1.1	0.35	9.9	0.999114	0.999011	1	0.999003		0.85	0.55	2.05		9.9	0.998718	1	1
0.9	0.2	1.95	0.2	0.55								0.15	0.7	0.2	0.7	9.95	0.999185	1	1	1		0.5	2.35	0.25	0.25							0.35	0.95	0.75	0.35	9.95	0.999114	0.999011	1	0.999003		2.45	0.4	0.7		9.95	0.998718	1	1
0.1	0.65	0.75	0.25	0.15								0.25	0.15	1.4	1.9	10	0.999185	1	1	1		0.4	0.35	1.15	0.25							0.6	0.85	1.6	0.85	10	0.999114	0.999011	1	0.999003		1.85	0.9	0.8		10	0.998718	1	1
0.55	0.2	0.85	0.15	0.9								0.25	0.45	0.25	0.65	10.05	0.999185	1	1	1		0.15	0.15	0.3	1.75							0.5	0.9	0.15	0.35	10.05	0.999114	0.999011	1	0.999003		0.25	2.1	1.3		10.05	0.998718	1	1
0.85	0.1	0.3	0.9	0.25								1.7	2.8	0.4	0.15	10.1	0.999185	1	1	1		2.4	0.25	1.35	0.35							0.95	0.65	0.2	0.65	10.1	0.999114	0.999011	1	0.999003		0.25	0.3	4.2		10.1	0.998718	1	1
0.1	0.4	0.15	0.95	0.6								0.6	0.6	0.25	0.4	10.15	0.999185	1	1	1		0.35	1.6	0.85	0.65							0.4	0.25	0.75	0.35	10.15	0.999114	0.999011	1	0.999003		1.95	0.85	0.1		10.15	0.998718	1	1
0.1	0.35	1	0.5	0.25								0.2	0.75	1.1	1.6	10.2	0.999185	1	1	1		0.15	0.85	0.75	0.15							1.05	1.2	2.25	2.25	10.2	0.999114	0.999011	1	0.999003		0.9	0.2	0.2		10.2	1	1	1
0.35	0.25	0.5	0.1	0.75								0.55	0.65	0.3	0.3	10.25	1	1	1	1		0.4	0.3	0.9	0.2							2.6	0.5	1.45	0.15	10.25	1	0.999011	1	0.999003		0.6	1.25	0.65
0.1	0.15	0.55	0.15	0.1								0.15	0.6	0.2	0.1							0.1	0.35	0.1	0.2							0.55	0.7	0.45	1.2	10.3	1	0.999011	1	0.999003		1.8	0.2	1.4
0.35	0.1	0.2	0.1	0.15								0.65	0.9	0.2	1.1							0.2	1.15	0.45	0.85							0.3	0.1	0.25	0.25	10.35	1	0.999011	1	0.999003		0.1	1.7	0.2
1.2	0.85	0.75	0.5	0.45								0.9	0.1	0.1	0.3							0.4	0.1	0.1	0.3							2.8	0.45	0.25	0.45	10.4	1	0.999011	1	0.999003		0.9	2.2	2.6
0.6	0.15	0.15	0.1	0.25								0.3	0.6	0.35	0.1							0.7	0.5	1.15	0.25							1.05	0.2	4.15	0.15	10.45	1	0.999011	1	0.999003		0.55	0.25	2.4
0.1	0.15	0.35	0.7	0.9								1.45	0.5	0.3	0.1							0.55	0.35	2.5	0.3							0.35	0.5	1.5	1.3	10.5	1	0.999011	1	0.999003		0.45	3.9	2.5
0.7	0.15	0.2	0.1	0.25								2.85	0.1	0.15	0.75							0.3	0.95	1.05	1.15							0.95	0.75	0.45	0.7	10.55	1	0.999011	1	0.999003		1.65	1	0.3
1.9	0.2	0.55	0.35	0.1								0.55	0.85	0.25	0.45							1.7	0.95	0.2	0.3							0.35	2.35	2.25	0.7	10.6	1	0.999011	1	0.999003		0.55	0.45	0.1
0.25	1.8	0.4	0.15	0.1								1.7	0.2	0.3	0.5							0.8	0.65	0.1	0.2							1.9	0.2	2.25	0.6	10.65	1	0.999011	1	0.999003		0.15	0.15	0.5
0.15	0.1	0.1	0.2	0.15								0.55	0.2	0.3	0.2							0.1	0.75	0.5	1.65							0.35	1.75	0.3	0.95	10.7	1	0.999011	1	0.999003		0.3	4.7	3.35
0.8	0.3	0.3	0.4	0.8								1.05	0.25	0.1	0.3							0.75	0.25	0.15	1.15							1.5	0.1	0.8	0.95	10.75	1	0.999011	1	0.999003		3.95	2.5	1.05
0.4	0.4	0.3	0.1	0.65								1.05	0.85	1.45	1.7							0.75	0.45	0.55	0.5							0.1	0.1	0.1	1.5	10.8	1	0.999011	1	0.999003		0.1	0.3	0.2
1.75	0.25	0.2	0.8	0.1								0.2	0.15	0.6	0.15							0.25	0.45	0.6	0.15							0.95	1.3	1.55	1.35	10.85	1	0.999011	1	0.999003		3.05	5.35	0.2
0.1	0.4	0.25	0.25	0.15								0.15	0.5	0.9	0.15							0.55	0.2	1.15	0.1							0.6	0.6	0.4	1.55	10.9	1	0.999011	1	0.999003		0.2	0.25	0.1
0.25	0.25	0.1	0.6	0.15								0.4	0.65	0.1	0.35							1.6	0.2	0.2	1.3							0.45	0.45	0.65	0.1	10.95	1	0.999011	1	0.999003		1.65	0.25	0.25
0.85	0.4	0.1	0.7	0.25								0.6	0.1	0.1	0.95							1.6	3.15	0.1	0.75							0.55	0.1	0.1	0.35	11	1	0.999011	1	0.999003		0.1	0.3	0.7
0.75	0.2	0.5	0.5	0.1								0.4	1.1	0.35	0.2							0.3	1.45	0.25	0.4							0.3	0.65	1.35	0.35	11.05	1	0.999011	1	0.999003		0.15	0.5	0.75
0.25	0.1	0.4	0.1	1								1.05	0.3	0.35	0.1							1.3	0.6	0.1	0.45							0.35	0.25	0.1	1.05	11.1	1	0.999011	1	0.999003		2.75	0.1	0.15
0.1	0.25	0.8	0.45	0.2								0.55	0.1	0.15	0.85							1	0.8	0.8	1.6							0.4	0.1	0.15	1.25	11.15	1	0.999011	1	0.999003		0.25	1.4	1.4
0.4	0.1	0.45	0.1	0.1								0.9	0.25	0.3	0.2							0.65	0.55	2.85	1.85							0.5	0.3	1.05	0.45	11.2	1	0.999011	1	0.999003		0.55	2.85	1.1
0.9	0.4	1.05	0.35	0.5								0.65	0.15	1.55	0.4							0.2	0.25	0.25	0.15							0.15	0.85	0.95	0.6	11.25	1	0.999011	1	0.999003		0.2	1.85	0.55
0.1	0.85	0.8	0.5	0.45								0.1	0.45	0.6	1.35							2.75	0.6	0.2	0.85							0.25	0.4	1.8	0.55	11.3	1	0.999011	1	0.999003		0.1	0.1	0.55
0.4	0.45	0.2	0.1	0.5								1.65	1.25	0.3	0.8							0.7	0.35	0.4	1.7							0.25	0.2	1.35	0.4	11.35	1	0.999011	1	0.999003		0.55	2.6	1.35
1.25	1.75	0.2	0.15	0.3								0.75	0.8	0.45	0.3							0.1	0.35	0.1	0.2							0.9	2.15	0.95	1.7	11.4	1	0.999011	1	0.999003		0.35	0.1	0.4
0.1	0.95	0.1	0.3	0.1								1.5	0.2	0.25	0.1							0.1	0.7	0.3	0.45							1.25	2.5	0.5	0.75	11.45	1	0.999011	1	0.999003		1.6	0.7	1.3
0.25	0.4	0.15	0.1	0.1								0.35	0.95	1.55	0.6							2.8	0.45	0.15	0.3							0.65	1.25	0.8	1.4	11.5	1	0.999011	1	0.999003		0.3	0.85	0.75
1	0.15	0.1	1.05	0.1								0.6	0.2	0.2	0.65							0.75	0.55	0.65	0.8							0.9	0.1	1.2	0.9	11.55	1	0.999011	1	0.999003		1.15	1.5	0.4
0.65	0.45	0.1	0.15	0.4								0.2	0.2	0.8	0.15							0.3	0.85	0.15	0.4							0.75	0.15	0.65	1.05	11.6	1	0.999011	1	0.999003		0.45	0.55	0.1
0.25	0.15	0.8	2.15	0.1								0.2	0.35	0.4	0.35							0.3	0.2	0.45	0.1							0.1	0.6	0.65	3.85	11.65	1	0.999011	1	0.999003		0.8	0.7	2.3
1.2	0.1	0.15	0.15	2.1								0.25	0.45	0.55	0.3							0.55	0.95	0.2	1.95							0.65	0.8	0.15	1	11.7	1	0.999011	1	0.999003		0.1	0.9	4.3
6.6	0.65	0.95	0.4	0.4								0.2	1.4	0.1	0.6							0.2	0.15	0.25	0.35							0.3	1.55	0.25	0.2	11.75	1	0.999011	1	0.999003		1.1	1.65	0.1
0.4	0.15	0.6	1	0.6								1.45	0.15	0.3	0.1							0.1	0.1	0.9	0.25							0.5	0.25	0.2	0.2	11.8	1	0.999011	1	0.999003		1.65	0.4	0.35
0.25	0.35	0.95	1.6	0.2								1.45	0.1	0.65	0.55							0.1	1.2	0.15	0.15							0.25	0.15	0.2	1.85	11.85	1	0.999011	1	0.999003		0.45	0.3	0.25
0.55	0.2	0.1	0.5	0.1								0.1	0.8	0.4	0.9							0.7	0.7	0.8	0.75							0.25	0.65	0.1	0.2	11.9	1	0.999011	1	0.999003		0.15	0.9	0.9
0.2	0.2	0.2	0.3	0.2								0.85	0.1	0.2	0.1							0.25	0.2	0.65	0.15							3.45	0.3	0.25	0.75	11.95	1	0.999011	1	0.999003		0.2	0.7	0.6
0.15	0.1	1.4	0.1	0.9								1.9	2.15	0.9	0.35							0.3	0.65	0.2	0.4							0.35	0.4	5.05	0.45	12	1	0.999011	1	0.999003		1.05	3.9	2.6
0.35	0.35	0.15	0.2	0.35								0.95	0.2	1.1	0.4							0.45	0.4	2.15	0.45							0.15	0.15	0.55	0.25	12.05	1	0.999011	1	0.999003		3.75	0.15	0.75
0.15	0.4	0.35	1.35	0.3								0.15	0.9	0.45	0.5							0.25	0.2	0.4	0.25							0.15	1.95	0.4	0.45	12.1	1	0.999011	1	0.999003		0.95	0.15	0.9
0.15	0.5	2	0.95	0.6								0.1	0.55	0.6	0.55							0.25	0.15	0.15	0.5							0.7	0.45	0.6	1.1	12.15	1	0.999011	1	0.999003		5.8	4.95	0.65
0.6	0.35	0.85	0.65	0.55								0.45	0.25	0.25	0.35							0.7	0.45	0.95	2.5							0.1	0.5	1.2	0.25	12.2	1	0.999011	1	0.999003		0.35	3.8	0.15
0.6	0.5	0.45	0.2	0.1								0.6	0.15	1.8	0.25							0.8	0.7	0.55	0.55							0.15	0.3	0.65	0.1	12.25	1	0.999011	1	0.999003		0.1	1.85	1.7
0.2	0.3	0.6	0.9	0.1								0.25	1.85	0.6	0.45							1.15	0.35	0.45	0.4							0.85	2.25	0.1	0.8	12.3	1	0.999011	1	0.999003		0.55	1.1	0.75
0.55	0.5	0.3	0.65	0.3								0.25	0.2	0.1	1.1							1	0.1	0.65	0.45							0.3	0.9	0.25	0.4	12.35	1	0.999011	1	0.999003		0.15	0.2	0.65
0.7	0.1	0.2	0.6	0.1								0.45	1.1	0.25	2.85							0.6	0.35	0.55	0.55							0.1	0.25	0.8	0.75	12.4	1	1	1	0.999003		0.25	2.35	0.85
1.85	0.7	0.2	0.25	0.6								0.5	0.35	0.15	1.45							0.55	0.55	0.85	0.35							0.55	0.4	0.65	0.4	12.45	1	1	1	0.999003		1.65	1.6	0.55
0.1	1	0.2	0.25	0.35								0.55	0.75	0.45	0.2							0.15	0.15	3.7	0.2							1	0.2	2.55	0.25	12.5	1	1	1	0.999003		1.55	0.65	0.5
0.35	0.3	0.25	0.15	0.25								0.1	0.1	0.15	0.3							0.55	0.4	0.2	1							0.15	0.9	0.1	0.5	12.55	1	1	1	0.999003		0.75	1.5	2.75
0.1	2.25	0.95	0.15	0.3								0.4	0.45	0.35	0.35							0.5	0.3	0.6	0.35							0.25	0.55	0.5	0.85	12.6	1	1	1	0.999003		0.85	0.9	0.1
0.3	0.8	0.25	0.2	0.4								0.2	0.5	0.75	0.35							0.25	0.4	0.35	1.8							1.65	0.3	1.35	1.1	12.65	1	1	1	0.999003		0.35	0.65	2.6
0.35	0.2	0.1	2.2	0.1								0.75	0.15	0.3	0.25							0.2	0.2	2.95	0.35							1.55	1.7	0.15	0.25	12.7	1	1	1	0.999003		2.85	0.45	0.6
0.45	0.65	1.1	0.4	0.1								0.35	0.15	0.45	0.15							1.2	0.1	0.6	0.85							0.2	0.4	0.1	0.1	12.75	1	1	1	0.999003		2.35	0.55	1.6
0.15	0.35	2.55	1.2	0.6								0.55	0.25	0.1	2.3							0.55	6.35	0.4	2.15							0.45	0.55	0.9	0.2	12.8	1	1	1	0.999003		0.6	0.75	2.1
0.15	1.15	0.8	0.9	0.2								0.25	0.6	0.15	1.1							0.7	0.3	1.45	0.45							1.3	1.8	0.1	0.3	12.85	1	1	1	0.999003		0.4	1.25	1.35
0.2	0.1	0.75	0.35	0.2								0.3	0.35	1.15	0.25							0.55	0.8	1.05	0.1							1.3	2.85	3.7	0.45	12.9	1	1	1	0.999003		0.1	0.65	0.75
0.2	0.9	0.5	0.4	0.9								0.35	0.15	0.95	0.85							0.1	0.25	0.6	0.5							1.5	0.25	0.3	0.3	12.95	1	1	1	0.999003		0.35	0.35	0.5
1.6	0.35	0.3	0.35	0.65								0.75	0.45	0.15	1.3							0.15	2.5	1.4	0.4							0.1	0.6	0.85	0.7	13	1	1	1	0.999003		0.55	0.3	0.25
0.65	0.5	0.8	0.15	1.4								1.2	0.1	0.15	0.2							0.65	1.95	0.3	0.25							0.65	1.9	0.45	3.15	13.05	1	1	1	0.999003		1.95	1.35	1.9
1.2	0.6	0.15	0.2	0.95								0.9	0.3	0.1	0.2							0.4	1	0.1	0.5							0.4	2.6	0.6	0.9	13.1	1	1	1	0.999003		0.3	0.85	0.95
0.75	0.35	1.9	0.15	0.15								0.15	0.1	0.8	0.5							0.25	0.75	1.3	1.15							0.5	1.5	0.3	0.1	13.15	1	1	1	0.999003		1.1	0.3	2.25
1.25	0.2	0.95	0.25	0.75								0.6	1.6	0.65	1.2							0.15	1.1	0.15	0.55							0.25	0.4	0.85	0.95	13.2	1	1	1	0.999003		3	0.6	1.1
0.35	0.65	0.25	0.15	1.05								0.6	0.35	1.45	0.1							1.4	0.9	0.15	0.15							1.35	1.6	0.7	0.2	13.25	1	1	1	0.999003		1	2.6	0.15
0.6	0.15	2.75	0.35	0.2								0.3	0.25	1.15	0.15							0.45	0.45	0.1	0.45							0.3	0.65	1.75	0.55	13.3	1	1	1	0.999003		0.4	0.45	0.8
0.15	0.1	0.1	0.1	0.4								0.35	1.1	0.3	0.35							0.15	0.65	0.2	2.05							0.25	0.4	0.4	1.35	13.35	1	1	1	0.999003		1	1.35	0.4
0.7	0.95	0.9	0.35	0.4								0.15	1.5	0.1	0.55							0.35	0.1	0.2	0.4							1.2	0.15	1.2	0.8	13.4	1	1	1	0.999003		0.1	0.9	1.1
0.15	0.2	0.2	0.5	0.3								1.65	1	0.65	0.9							2.3	0.15	0.15	0.55							0.15	0.15	0.45	0.15	13.45	1	1	1	0.999003		1.65	0.1	0.65
0.65	1.1	0.9	1.1	0.8								0.2	1.1	0.15	0.5							0.25	0.75	0.2	0.45							1.8	1.75	3.05	0.15	13.5	1	1	1	1		2.1	0.3	0.15
0.35	0.25	0.85	0.1	0.35								0.1	0.4	0.2	0.25							0.3	0.55	0.1	0.6							0.45	2.35	0.2	1							0.35	0.7	2.4
0.3	0.15	0.15	0.15	0.25								0.65	0.5	0.35	0.3							0.55	0.2	0.1	0.25							0.95	3.2	0.6	0.8							2.05	1.85	0.1
0.1	1.1	0.85	0.15	0.3								0.25	0.1	0.1	0.95							0.45	0.25	0.5	0.65							0.2	0.1	1.05	0.25							0.3	0.1	0.1
0.1	0.15	0.7	0.5	0.1								0.9	0.15	0.1	1.2							1.2	0.75	0.25	0.95							3.6	1.45	1.3	0.15							0.1	0.4	2.75
0.5	1.8	0.25	1.2	0.35								0.9	2.25	0.2	1.2							0.15	0.2	0.65	0.5							0.35	0.25	0.5	0.6							0.9	0.1	0.45
0.25	0.15	0.15	0.35	0.3								0.3	0.1	0.1	0.1							0.1	0.85	0.1	0.5							0.1	0.65	1.4	1.25							1.95	1.65	0.1
0.1	0.15	0.25	0.4	1.2								0.25	0.15	0.45	0.4							0.45	0.3	0.2	0.95							1.1	0.9	0.2	0.2							0.6	2.25	0.9
1	0.25	0.65	0.3	0.6								0.2	0.25	0.75	0.7							1.3	0.65	0.6	0.85							0.25	1	0.15	0.1							1.55	0.55	0.1
0.5	0.45	0.7	0.25	0.1								0.6	0.1	0.15	0.4							0.45	0.25	0.8	1.45							0.3	2.05	0.4	0.8							1.15	0.9	0.85
0.35	0.3	0.35	0.6	0.25								1.05	0.15	0.25	0.25							0.3	0.45	0.65	0.35							0.4	0.55	0.8	3.75							0.65	1.55	0.15
0.3	0.65	0.1	0.45	1.15								0.1	1.5	0.7	0.7							0.1	0.65	0.9	0.9							0.45	1.25	0.1	0.25							0.85	0.95	0.6
0.15	1	0.25	0.15	2.1								1.15	0.3	0.15	1.35							0.8	0.7	0.5	0.15							0.6	3.85	0.65	1.3							0.95	0.25	2.65
0.35	0.55	0.15	0.7	0.3								0.6	0.6	0.1	0.55							0.6	0.3	0.3	0.1							0.1	0.45	0.7	0.5							0.35	0.25	0.55
0.65	0.25	0.1	0.3	1.65								0.3	0.15	1.55	0.2							0.25	0.35	0.7	0.7							3.9	0.75	2.7	1.65							0.65	0.2	1.7
0.15	0.25	0.45	1.1	0.45								0.6	0.3	0.25	0.25							1.6	0.2	0.45	0.45							0.6	0.25	0.2	2.25							0.2	1.15	0.25
0.65	0.95	0.45	0.1	0.3								0.15	0.2	0.55	0.15							0.2	0.15	0.15	0.6							0.15	0.35	0.1	0.5							0.2	0.1	0.35
0.25	0.85	0.1	0.1	0.2								0.1	0.15	0.1	0.35							0.75	0.95	1.9	0.2							0.1	0.4	0.3	0.1							2.25	0.35	2.6
0.2	1	0.35	1.25	0.15								3.15	0.45	0.2	0.5							0.4	1.6	0.45	0.4							0.6	0.85	0.25	1.7							8.9	0.45	0.1
0.6	1.05	0.55	1	0.5								0.3	1.4	0.35	0.5							0.15	0.55	0.75	0.15							0.95	0.95	0.3	0.35							0.3	1.4	0.4
0.15	1.4	0.2	1.15	0.1								0.4	0.3	0.35	0.2							0.1	0.15	0.75	0.1							0.7	1.7	0.4	0.1							0.3	1.55	0.2
0.75	0.7	0.1	0.5	0.2								0.3	0.1	0.1	0.4							3.9	0.45	0.7	0.1							0.45	1.15	1.1	2.2							0.55	0.2	0.3
0.45	3.4	0.45	0.1	0.4								0.25	0.25	0.1	0.5							0.5	0.15	0.35	0.1							0.85	1.5	1.45	0.45							0.35	0.45	0.3
2.1	0.65	1	0.55	0.25								0.45	0.1	0.5	0.5							0.1	0.15	0.5	0.2							1.45	1.25	0.4	0.55							1.15	0.25	0.35
0.2	0.15	0.3	0.4	0.1								0.1	0.35	0.3	0.15							0.45	0.25	1.05	0.15							0.1	1.2	0.2	0.7							0.55	0.55	0.6
0.8	0.3	0.15	0.4	0.25								0.1	0.45	0.1	0.65							0.8	0.35	1.1	0.45							0.45	1.45	0.15	0.8							0.15	1.15	3.1
0.45	0.3	0.2	0.15	0.2								0.15	0.45	1	0.85							0.8	0.15	0.25	0.25							0.25	0.45	1	0.8							0.15	1.95	0.55
1.75	0.15	0.5	0.45	0.4								0.45	0.35	0.2	0.55							0.7	0.35	0.2	0.75							0.4	1	0.55	0.7							0.25	1.6	2.35
0.55	0.25	0.15	0.15	1								0.1	0.2	0.9	0.45							0.3	0.65	0.15	0.4							0.75	0.7	0.15	0.35							1.35	0.4	1.15
0.3	0.25	1.95	0.15	0.15								0.15	0.35	0.45	6							0.5	0.8	0.3	0.6							0.45	0.15	0.1	2.85							1.4	1.25	0.7
2.15	0.95	0.55	2.05	0.25								0.45	0.3	0.2	0.45							0.1	0.15	4.85	0.15							0.1	1.9	0.65	0.8							0.25	2.4	0.8
0.45	0.1	0.1	1.65	0.3								0.2	0.15	0.25	0.75							0.25	0.2	0.6	0.15							0.25	0.65	0.1	1.1							0.65	1.55	1.05
1.55	0.2	0.4	0.4	0.8								0.2	0.55	0.6	0.65							0.7	0.25	0.3	0.1							1.95	0.3	3.3	0.6							1.1	0.45	1.4
0.35	0.35	0.1	0.7	0.15								0.35	0.25	0.1	0.3							0.4	0.1	0.25	0.6							1.35	1.1	0.3	0.9							1.1	0.7	0.1
0.2	0.25	0.3	0.15	1.25								0.85	0.25	0.1	0.85							0.15	0.15	0.3	1.6							0.25	2.05	0.45	0.65							1.1	0.5	0.5
0.5	0.55	0.1	0.15	0.6								1.05	0.3	0.35	0.5							0.7	0.15	0.4	0.9							0.3	1.3	0.15	0.95							0.65	0.45	0.7
0.6	1.15	1.25	0.4	0.35								1.45	0.2	0.45	0.2							0.25	0.75	0.85	1.3							0.35	0.2	0.35	0.8							3	0.4	1.05
1.05	0.3	0.15	3.4	0.3								0.2	0.1	0.15	0.6							0.2	0.6	0.5	0.1							0.15	0.4	0.7	0.75							0.65	1.1	0.7
0.45	0.45	0.45	0.25	0.25								0.2	0.3	0.7	1.05							0.55	0.45	0.3	0.3							0.15	0.15	0.35	0.5							0.35	0.25	0.1
0.2	0.1	0.35	0.75	0.3								0.7	0.3	0.1	0.1							0.35	0.15	1.3	0.4							0.5	0.1	0.15	0.65							1.7	1.05	0.1
0.1	0.15	0.4	0.4	0.2								1.05	0.45	0.2	0.6							0.1	1.25	1.45	0.5							3.25	0.4	0.1	0.1							1.75	0.9	0.9
0.25	0.6	0.35	0.45	0.35								2.65	0.45	0.65	0.55							0.1	1	0.1	0.25							0.1	1.45	0.2	0.15							0.95	1.05	1.4
1.9	0.2	0.1	1.6	0.15								0.8	0.1	0.15	0.65							0.4	0.1	6.15	0.25							0.5	0.1	2.6	0.25							3.2	1.5	0.1
0.2	0.2	0.2	2	0.2								1.95	0.3	1.4	0.65							1.2	0.55	0.2	0.3							1	1.1	0.65	0.7							0.45	0.25	0.15
0.1	0.25	1.4	0.5	1.4								0.35	0.4	0.1	0.55							0.3	0.45	1.8	1.5							0.7	0.3	0.2	1.3							0.45	0.65	0.25
0.15	0.35	0.15	0.35	0.1								0.95	1.1	0.45	0.4							0.9	0.25	4.4	1.05							0.3	0.45	0.15	2.5							0.65	0.1	3.1
0.4	0.35	0.75	0.25	0.1								0.75	0.85	0.35	1.3							0.4	0.35	0.25	0.1							4.25	1.9	0.1	0.4							0.75	1.05	0.1
0.45	0.9	0.1	0.55	0.5								0.4	0.15	0.55	0.55							0.1	0.85	1.2	1.55							0.1	0.1	1.65	1							1.65	2.15	0.45
0.25	0.7	0.55	0.55	0.2								0.35	0.55	0.2	0.1							0.2	0.2	0.9	0.1							0.4	1.25	0.9	1.9							0.4	0.3	0.1
0.2	0.5	1.05	0.8	0.2								0.15	0.15	0.45	0.1							0.2	0.25	0.25	0.65							0.25	0.7	2.65	1.7							4.2	3.1	0.7
0.1	0.25	0.7	0.4	0.55								0.1	0.15	0.35	0.65							0.8	0.4	0.35	0.1							1.15	1.8	0.1	0.5							0.25	0.1	1.45
0.15	0.3	0.15	0.2	0.3								0.15	0.15	0.2	1.1							1.4	0.5	0.45	0.15							1.25	0.45	0.15	0.1							0.25	0.9	0.15
2.05	0.35	0.2	0.4	0.1								0.1	0.15	0.15	0.15							0.5	0.3	1.25	1.55							2.3	0.45	0.1	1.1							0.3	0.15	1.15
0.15	0.2	0.1	0.2	0.1								0.2	0.15	0.1	1.25							0.1	0.75	0.2	1.6							0.45	0.85	0.3	0.2							1.65	3.4	0.85
1.05	0.1	0.9	0.15	0.2								0.15	0.4	0.3	0.3							0.8	1.95	0.2	0.1							0.55	0.15	0.75	0.55							0.65	0.7	1.1
0.15	0.5	0.25	0.15	0.1								0.6	0.45	0.2	0.55							0.15	0.4	0.3	0.1							0.2	1.3	0.7	0.4							0.25	0.1	1
0.5	0.2	0.25	0.8	1.5								0.85	0.85	0.15	0.2							0.55	1.6	0.15	0.1							0.75	0.1	0.2	1.1							1.3	4.75	0.25
0.25	0.25	0.15	0.25	0.8								0.1	0.45	0.1	0.5							0.1	0.35	0.5	1.75							0.35	0.8	0.55	0.55							0.3	1.2	0.8
0.4	0.1	0.2	0.8	1.2								0.5	0.3	0.55	0.7							1.05	0.65	0.45	0.3							0.75	0.4	0.15	0.6							0.7	1.1	0.2
0.65	0.65	0.25	0.1	0.6								0.15	0.45	0.35	0.4							0.1	0.2	0.25	0.1							0.75	0.85	1.8	0.5							0.5	0.75	0.3
0.15	0.7	0.7	0.15	0.1								0.25	0.25	0.15	0.15							0.9	1.1	0.15	0.7							0.25	0.35	0.4	0.9							1.1	1.25	0.1
0.5	0.2	0.35	0.35	0.35								0.15	0.2	0.5	0.35							0.65	0.4	1.3	3.8							0.8	0.45	1.9	0.35							0.2	0.75	0.1
1.55	0.4	0.15	0.1	0.4								0.5	1.05	1.2	0.2							0.1	0.5	0.25	0.1							0.75	0.2	1.5	0.25							0.25	0.25	0.55
1.1	0.55	0.2	0.45	0.3								0.9	2.05	0.3	0.1							0.95	0.6	0.55	0.75							1	1.05	2.2	0.6							7.05	1.45	0.35
0.5	0.95	0.3	0.2	0.15								0.65	0.1	0.15	0.3							0.45	0.1	0.35	0.25							0.3	0.45	0.1	0.15							0.2	0.1	0.7
0.1	0.1	0.45	0.7	0.1								0.25	0.15	1.05	0.15							0.6	0.9	0.5	0.2							0.6	0.8	1.5	1.8							2.2	0.15	0.8
0.75	0.15	0.1	0.45	0.1								1.45	0.15	0.6	0.1							0.5	0.4	0.7	0.4							0.35	0.45	0.65	1.25							2.75	2.85	3.6
1.7	1.5	0.3	0.45	0.1								0.2	0.7	0.15	0.25							0.25	0.85	0.3	0.15							0.7	0.75	0.2	0.7							0.15	0.1	0.15
0.9	0.25	0.15	0.35	1.25								0.45	1.4	0.1	0.4							0.1	0.15	0.3	0.25							0.25	0.1	0.35	0.2							1	5.55	0.7
0.25	0.3	0.45	0.35	0.7								0.35	0.95	0.85	0.6							0.6	0.5	0.5	0.15							1.8	0.25	2.95	0.15							1.1	1.05	1.85
0.15	0.5	0.25	1	0.65								0.15	0.4	0.2	0.55							1.25	0.6	0.8	0.2							0.4	0.15	0.6	0.2							1.05	0.2	1.1
0.1	0.85	0.3	1.15	0.1								0.15	0.3	0.85	0.35							0.1	0.5	0.15	0.3							1.7	0.45	1.35	0.4							1	0.2	0.75
0.2	0.65	1.3	1.1	0.1								8.3	0.1	0.15	0.2							0.35	0.25	0.1	1							0.8	0.55	1.05	1.4							0.5	0.85	2.15
0.45	0.35	0.45	0.1	0.15								0.2	0.2	1.6	0.35							0.15	0.4	1.5	1.15							0.6	1.95	0.3	0.35							0.4	0.1	0.85
0.95	0.35	0.3	0.1	0.1								0.35	0.15	0.25	0.55							0.95	0.15	1.95	0.85							2.3	0.15	0.15	0.2							0.5	1.75	0.35
0.5	0.45	0.2	0.1	0.1								1.05	0.65	0.1	0.25							0.2	0.15	0.25	0.8							0.25	0.25	3.95	2.2							0.6	0.45	0.7
0.2	1.25	0.15	0.45	0.15								0.1	0.4	0.25	1.35							0.6	0.45	1.1	0.15							0.15	2.6	0.3	0.55							0.4	0.35	0.7
0.1	0.6	0.1	0.45	0.5								0.35	0.3	3.2	0.4							1.85	0.15	1.45	0.15							0.35	0.45	0.55	0.95							0.85	0.4	3.15
0.85	0.4	0.1	0.35	0.35								0.1	0.15	0.35	0.65							0.35	1.05	0.25	0.25							0.75	0.3	0.6	1.3							0.35	0.45	0.1
1.2	0.8	0.15	5.3	1.3								0.15	0.45	2.65	0.5							0.1	0.55	0.55	0.85							1.85	2.6	0.2	0.2							0.6	0.3	0.25
0.55	0.3	0.55	0.1	0.1								0.1	0.2	0.15	0.45							3.65	0.25	0.1	1.25							0.5	4.05	0.4	2.35							3.45	1.5	0.4
0.4	0.1	1.8	0.15	1.2								0.3	1.2	0.45	0.6							0.1	0.7	1.15	0.4							0.3	2.8	0.4	0.1							0.65	0.15	0.7
0.15	0.5	0.3	0.1	0.2								1.7	2.25	0.15	0.3							0.5	0.2	0.4	0.25							0.3	1.8	0.55	0.8							1.4	1.7	0.65
0.25	0.25	0.6	0.2	0.7								0.3	0.15	0.3	1.65							0.3	0.45	0.1	0.9							0.25	0.45	0.15	0.55							1.15	4.95	1.85
0.65	1.2	1.5	1.3	0.1								0.7	2.8	0.15	1							0.15	2.2	0.15	3.7							0.25	0.25	0.15	2.15							0.55	0.1	2
0.15	0.2	1.7	0.85	1.25								0.1	0.35	1.2	0.3							0.4	1.65	1.2	0.15							0.75	0.15	0.85	0.95							0.2	0.3	0.85
1.35	0.8	0.9	1.1	0.1								0.5	1.05	0.35	0.35							0.95	0.55	0.25	2.6							0.2	0.5	1.05	0.6							2.15	1.1	2
0.5	0.3	0.45	0.1	0.2								0.1	0.7	0.3	0.25							0.3	1.6	0.25	0.3							0.3	1.15	0.85	0.6							1.9	0.25	0.3
3.15	0.25	0.15	0.1	0.1								0.3	0.4	0.15	0.45							0.7	0.3	0.4	0.5							0.4	0.7	0.75	0.2							0.15	0.1	4.4
0.5	1	0.65	0.1	0.15								0.7	0.1	0.4	1.9							1.55	0.55	0.25	0.45							0.15	0.45	0.2	5.65							1.2	0.6	0.1
0.15	0.75	1.95	0.55	0.6								0.35	0.1	0.1	0.1							1.15	0.5	1.5	0.9							1.15	0.55	0.65	0.45							0.4	0.85	0.1
1	0.2	0.9	0.15	0.15								1.4	0.35	0.55	0.1							0.7	0.45	1.95	0.1							0.25	2.25	0.7	0.4							1.7	1	1.1
0.15	0.55	1.9	1.85	0.15								1.8	1	0.3	0.2							1.3	0.8	0.2	0.85							0.9	0.2	0.15	2.4							0.75	0.75	0.35
0.45	0.4	0.15	0.9	0.2								1.3	1.3	0.9	0.25							1.25	0.25	0.7	0.1							0.15	0.75	3.85	0.1							2.4	0.3	0.3
0.3	0.4	0.35	0.8	0.25								0.1	0.15	0.2	0.35							0.15	0.45	0.1	0.8							0.6	0.95	1.2	0.2							0.1	0.1	0.95
0.35	0.5	1.65	0.2	0.15								0.1	0.9	0.3	0.35							0.2	0.1	0.3	0.3							3.15	0.7	0.75	0.6							3.35	2.1	1.7
0.1	1.05	0.35	0.6	0.35								0.15	2.1	0.2	0.3							0.95	1.2	0.45	0.4							0.1	0.1	0.75	0.7							0.35	0.1	0.5
0.35	0.15	0.2	0.35	0.1								0.1	0.5	0.4	0.4							0.2	0.3	0.15	0.65							1.4	0.5	0.6	1							0.15	3.05	3.5
0.3	0.1	0.5	0.2	0.15								0.9	0.15	0.4	0.55							0.2	0.4	0.75	0.2							0.75	0.8	0.2	0.25							0.2	2.05	0.65
0.4	1.2	0.35	1.3	0.65								0.6	0.1	0.1	0.7							0.1	0.15	0.35	0.35							0.25	0.1	0.3	0.15							1	0.25	0.8
0.3	0.6	0.4	0.45	0.3								0.5	0.6	0.2	0.35							0.25	0.35	0.45	0.15							1.4	0.55	1.3	0.9							0.2	0.55	1.6
0.35	0.55	0.45	0.2	1.55								0.15	0.65	0.35	0.2							0.25	0.4	0.2	0.15							0.15	1.05	0.15	2.1							1.25	0.75	0.6
0.65	0.25	0.3	0.15	0.3								0.25	0.2	1.25	0.65							0.3	0.3	0.75	0.2							1.25	0.15	1.3	0.3							0.65	1.15	0.95
1.2	0.35	0.2	0.1	0.2								0.35	0.5	0.3	1.15							0.4	2.8	0.25	0.2							0.75	0.25	0.2	1.3							0.1	1.35	0.25
0.1	0.3	0.2	0.7	0.35								1.7	0.15	0.35	1.6							1.4	1.45	0.95	2.35							0.5	0.75	1.7	0.6							0.55	0.55	2.45
0.7	0.25	0.85	0.25	0.15								0.15	0.3	0.65	0.2							0.3	1	0.1	0.15							0.25	1.85	2.55	2.1							0.1	1.2	0.6
0.65	0.55	0.1	0.1	1.75								0.35	0.85	0.1	0.55							0.6	0.8	0.15	0.35							1	1.65	0.7	1.95							4.35	2.5	2.05
0.15	0.15	0.45	0.1	0.2								0.5	0.2	0.1	0.35							0.85	1.05	1.25	1.25							0.1	4.35	0.4	0.15							0.1	0.95	0.55
0.1	0.35	0.55	0.2	0.15								0.4	0.2	0.75	0.55							0.2	0.55	0.45	0.1							0.3	0.4	0.1	0.85							0.4	0.2	0.35
1.1	0.15	0.1	2.65	0.35								0.1	0.65	0.3	0.45							0.1	1	0.1	0.5							0.25	0.55	1.05	0.9							0.35	0.75	3.4
0.6	0.1	0.7	0.15	0.7								2.2	0.1	0.25	0.1							0.2	0.15	0.8	0.95							0.65	0.85	0.55	1.75							0.75	0.9	0.1
0.2	0.1	0.1	1.55	1								0.55	0.3	0.4	1.65							0.1	0.75	0.5	1.1							0.1	0.75	0.1	0.75							0.35	0.15	0.15
0.65	0.1	0.4	0.1	0.1								0.3	0.1	0.3	0.55							0.6	0.1	2.25	0.15							0.1	0.1	2	0.4							1.25	1.85	2.1
0.25	0.15	0.95	0.1	0.15								0.8	0.95	1.05	0.75							0.75	1.05	0.8	0.7							0.5	0.2	0.3	0.5							0.2	1.7	1.55
1.3	0.15	0.5	0.55	0.9								0.1	0.2	0.3	0.1							0.4	0.4	0.35	0.15							0.25	1.05	0.35	0.3							8	0.4	1.95
0.4	0.1	0.35	0.3	0.15								0.1	1.6	0.25	3.15							0.35	0.95	0.4	0.8							0.2	1.25	0.35	1.9							0.3	2.45	0.65
0.35	0.5	0.35	1	0.1								0.75	0.2	0.35	1.3							0.2	3.45	0.4	0.55							0.35	0.25	2.15	0.7							0.55	0.3	1.4
0.3	0.5	0.7	0.5	0.25								1.05	0.3	0.25	0.25							1.8	0.1	5.05	0.15							0.9	0.6	0.15	2.8							0.7	0.35	0.35
0.15	0.45	0.8	0.5	0.1								0.35	0.75	0.4	0.4							0.1	1.7	0.25	3.15							2.05	0.15	0.2	1							1.05	0.25	2
0.6	0.65	0.15	0.1	0.3								0.15	0.1	0.75	0.55							1.5	0.25	0.5	1							0.15	0.2	1.05	0.3							2.1	5.4	0.4
1.05	0.35	0.1	0.3	0.4								0.35	0.15	0.25	0.1							0.9	0.5	0.65	0.25							0.15	2.7	0.1	0.9							0.35	0.65	0.5
0.25	0.3	0.6	0.1	0.1								1.1	2.4	0.55	0.5							0.2	0.5	0.15	1.45							0.45	0.6	0.2	0.7							0.4	0.85	0.25
0.25	1.1	0.25	0.1	0.35								0.1	0.1	1.05	0.75							0.75	0.4	0.5	1.15							0.55	0.55	1.2	0.2							1.1	0.95	1.1
0.45	0.1	0.75	0.3	0.6								0.4	1	0.25	0.2							1.35	0.15	0.1	0.2							0.1	1.65	0.1	0.4							0.2	0.4	0.25
0.35	0.2	0.1	0.45	0.75								0.15	0.2	0.25	0.1							0.35	0.1	0.45	0.1							0.1	0.95	0.3	0.5							0.6	0.65	0.3
0.1	2.2	0.2	0.5	0.3								1.7	0.7	0.4	2.95							0.9	0.45	0.85	0.3							1	0.15	0.9	0.45							2.4	0.15	1.1
0.35	0.1	1.25	0.15	0.15								1	0.55	0.5	0.15							3.45	0.6	0.7	0.3							0.55	3.75	1.15	0.1							0.35	0.35	2.95
0.1	0.2	0.45	0.25	0.65								0.75	0.35	2.7	0.6							2.2	0.45	0.55	0.6							0.35	0.4	0.15	0.2							3.95	1.1	0.6
0.2	0.6	0.4	0.2	0.15								0.15	0.1	1.05	0.2							2.5	0.2	2.6	0.1							0.45	0.15	1.1	0.7							0.85	0.9	0.75
0.8	0.3	0.5	0.4	0.35								2.2	0.45	0.9	0.1							0.1	0.55	0.6	0.85							0.1	0.7	0.65	0.5							0.7	0.2	0.1
0.3	0.3	0.2	0.55	0.3								0.25	0.1	0.2	0.2							0.1	0.65	0.1	0.3							0.55	1.6	0.4	1.2							8.2	1.8	0.15
0.65	0.7	0.45	1.5	0.2								0.95	0.15	0.1	0.4							0.2	0.45	0.3	0.1							0.35	1.5	1	0.95							2	0.5	2.4
0.1	0.6	0.15	3	0.5								0.3	0.3	0.3	0.55							0.5	0.15	0.1	0.75							0.75	0.85	0.1	0.95							1	0.75	1
0.55	0.1	0.25	0.15	0.15								1.05	0.1	0.45	0.15							0.7	0.4	0.2	0.6							1.25	2.2	0.1	0.4							0.45	0.1	2.15
0.15	0.25	0.2	1.05	0.25								0.15	0.1	0.45	0.35							0.75	1.35	0.2	0.4							0.1	0.4	0.15	0.55							0.2	0.8	1.65
0.95	0.25	1.35	0.75	0.2								1.1	0.2	0.9	0.25							0.3	0.75	0.2	1.6							0.2	0.7	0.15	0.3							0.25	1.15	0.15
0.7	0.15	0.85	0.25	0.6								0.6	0.1	0.15	0.8							0.25	0.2	0.7	0.1							2.15	0.9	2.35	0.2							0.5	0.55	5.45
0.25	0.25	0.4	0.55	1.5								0.1	0.15	0.35	0.35							0.55	0.15	0.25	0.15							1.6	1.6	0.7	0.1							0.6	0.2	0.2
0.55	0.7	0.75	0.7	0.6								0.3	3.1	0.25	0.45							1.25	1.65	0.2	1.2							0.75	1.45	0.65	0.5							0.45	0.35	1
1	0.2	0.25	0.15	1.3								0.4	0.2	0.35	1.05							1.3	0.8	0.15	0.55							0.2	0.35	4.35	0.7							0.55	2.35	1.35
0.55	0.25	0.85	0.45	0.1								0.8	0.2	0.7	0.3							0.9	0.3	0.95	0.35							0.25	1.9	0.2	0.45							0.8	0.3	0.2
0.1	0.95	0.6	0.25	0.1								0.2	0.15	0.1	0.15							0.3	0.55	0.55	0.2							0.3	3.1	0.85	0.3							0.15	2.7	0.3
0.2	0.25	0.15	0.2	0.35								0.25	0.25	0.25	0.4							0.9	1.6	0.3	1.65							0.4	0.4	0.1	0.1							0.55	1.8	1.7
0.3	0.2	1.2	0.5	0.3								0.65	1.5	0.4	0.55							0.5	1.95	0.25	0.25							0.3	0.95	0.6	2.6							0.4	0.8	0.45
0.55	0.15	1.45	0.4	0.15								0.7	0.2	0.6	0.35							1.7	1.4	0.75	1.35							0.15	0.1	0.3	0.35							0.3	0.15	0.2
0.55	0.6	0.45	0.4	0.55								1.2	0.25	0.6	1.55							1.7	0.15	0.35	0.15							0.15	2.2	0.35	0.65							1.4	0.95	0.55
0.15	0.1	0.1	0.35	1.3								0.4	0.15	0.9	0.35							0.1	4	0.35	0.1							0.15	0.1	0.1	0.65							0.6	0.55	0.2
0.3	0.5	2.3	0.7	0.2								1.3	0.35	0.25	0.2							0.15	0.4	1.45	0.25							1.7	0.2	0.35	0.1							0.6	0.9	0.8
1.2	0.2	0.6	0.2	0.2								0.35	0.35	2.05	0.7							0.25	0.25	0.15	0.2							0.35	0.1	0.15	0.4							0.75	0.45	0.2
0.45	0.4	0.1	0.2	0.2								0.15	0.8	0.85	1.25							0.35	0.1	0.9	0.5							10.25	0.4	0.3	0.75							0.35	0.7	0.7
0.5	0.1	0.2	0.35	0.1								0.3	0.15	0.5	0.2							1.1	0.25	0.9	0.35							1.65	0.1	0.45	1.65							0.1	0.2	1.35
0.25	0.9	0.2	0.85	0.85								0.15	1.45	0.5	0.7							0.2	1	1.5	0.6							0.25	1.2	0.4	0.45							0.55	0.45	1.15
0.7	0.1	0.15	0.5	0.7								0.3	0.15	0.6	0.7							1	0.25	0.25	1.6							1.4	0.5	0.5	1.25							1.15	0.2	0.3
0.3	0.5	0.1	0.35	0.1								2	0.3	0.1	0.15							0.6	1.05	0.65	0.15							1.45	0.6	0.45	0.1							0.15	0.25	2.05
0.35	0.65	1.3	0.8	0.95								0.15	0.2	0.25	1.25							0.25	0.2	0.1	0.4							0.35	0.25	0.5	1.35							0.9	1.4	0.9
0.9	0.95	0.45	0.1	0.2								0.5	1.15	0.4	0.2							0.4	0.15	1.15	0.3							1.25	4.35	0.15	0.3							1.2	1.05	0.7
0.5	0.15	0.15	0.4	0.1								0.45	0.1	0.15	0.1							2.45	0.85	0.7	0.3							0.4	0.3	0.25	1.75							1	0.4	0.5
2.05	0.1	0.45	0.1	0.4								0.55	0.25	0.65	0.2							1.25	0.2	1	0.2							0.95	0.2	0.85	0.2							0.4	1.75	0.8
0.35	0.3	3.5	0.1	0.55								0.1	0.5	0.1	0.25							0.45	2.4	0.4	0.3							0.85	1.35	0.15	0.6							1.5	1.35	0.35
0.15	0.9	0.1	0.1	0.1								0.9	0.5	0.5	0.1							0.45	0.5	0.95	0.15							0.25	0.1	0.1	0.1							0.4	0.45	2.85
0.15	1.7	0.3	0.85	0.1								0.8	0.15	0.4	0.25							0.3	0.2	0.2	0.25							0.2	0.3	0.15	0.15							0.1	1.05	0.9
0.3	0.45	0.35	0.25	0.8								0.3	0.35	0.3	0.4							0.25	1.3	0.9	0.85							0.25	0.75	0.15	0.2							0.8	0.8	0.8
0.7	0.1	0.4	0.55	0.6								0.6	1.5	0.1	0.4							0.35	0.4	0.1	0.3							0.75	0.95	0.6	0.15							0.2	0.15	1
0.2	0.1	1.6	0.4	0.35								0.2	0.2	0.15	0.85							0.1	0.1	1.15	0.25							1.15	0.3	0.2	1.15							1.3	2.25	0.95
0.8	0.9	0.6	0.2	0.35								0.6	0.25	0.1	1.2							0.35	0.35	0.2	0.45							0.2	2.15	1.25	0.3							1.8	1.35	0.35
0.5	1.6	0.35	0.15	0.15								0.25	0.35	0.8	0.45							2.85	0.15	1.25	0.15							0.2	1.3	0.4	0.6							1.15	1.1	0.35
0.3	0.4	0.1	0.4	0.6								0.35	0.2	1.1	0.3							0.15	0.25	0.55	1.15							0.85	3	0.15	0.35							0.6	1.2	1.7
0.15	0.2	0.6	0.2	0.25								1.25	0.2	1.25	0.65							1.25	0.15	0.6	0.1							0.2	0.2	0.1	0.8							0.65	0.25	0.6
2.3	0.25	0.15	0.6	0.7								1.45	0.1	0.2	0.35							0.1	0.75	0.45	0.55							0.15	0.7	0.1	0.25							0.4	0.6	0.1
0.2	0.25	2.3	0.55	0.3								0.3	0.4	1.95	0.9							0.4	1.1	0.15	3.35							0.7	0.2	0.1	0.2							0.1	0.7	2.05
0.15	0.65	0.1	0.75	0.75								0.2	0.2	0.2	0.85							0.95	0.9	0.6	0.1							1.05	0.7	0.2	1							5.25	0.6	3.15
0.9	0.1	0.1	0.15	0.85								0.2	0.25	0.35	0.2							1.95	1.2	0.25	0.75							0.7	0.2	0.55	0.55							1.7	0.85	5.95
0.7	0.15	0.15	2.9	0.7								0.25	0.55	1.4	0.2							0.1	1	0.15	1							0.1	0.2	0.1	0.8							0.55	0.75	0.35
0.55	0.35	0.15	0.15	0.4								0.65	0.1	0.15	0.25							0.25	0.25	0.1	0.45							1.6	0.15	0.75	0.4							5.7	0.7	0.35
0.2	0.1	0.1	1	0.3								0.15	0.25	0.3	0.3							0.3	0.45	0.15	0.25							0.15	0.5	0.55	2							0.2	3	0.25
0.35	0.1	0.3	0.25	0.2								0.75	0.4	0.8	0.2							1.4	0.55	0.35	4.1							0.55	0.5	0.8	0.7							1.2	1.9	0.2
1.25	0.25	0.65	0.55	0.25								0.6	0.6	0.1	2.55							2.6	0.1	0.55	0.7							1	0.15	0.2	0.3							0.65	0.25	1.3
0.1	0.1	0.1	0.1	0.15								1.65	0.45	0.85	0.2							1.65	0.2	0.5	0.1							0.3	1.35	0.15	1.05							6.1	0.4	0.2
0.55	0.35	0.1	0.2	0.55								0.1	0.1	0.5	1.25							0.15	0.15	0.85	1							0.15	0.3	0.2	0.15							0.65	0.6	0.35
2.1	0.45	0.7	0.35	0.55								0.15	0.4	0.15	0.2							0.6	0.2	0.5	0.5							1.35	0.15	0.15	0.5							0.5	0.75	0.5
0.1	0.1	0.6	0.9	0.65								0.15	0.35	1	0.5							0.4	0.15	0.65	1.25							0.45	0.1	0.15	2.65							0.5	0.15	0.65
0.15	0.75	0.55	0.55	0.8								0.75	0.55	0.1	0.25							0.95	0.25	0.1	0.55							0.75	0.6	0.3	0.25							0.2	2.45	0.4
1.6	0.3	0.25	0.2	0.5								0.65	0.4	0.25	0.25							1	1.5	0.8	0.45							1.2	0.45	1.4	0.75							0.2	0.55	0.7
0.15	0.25	0.45	0.75	0.7								0.1	0.15	0.1	0.7							0.2	0.55	0.35	0.1							0.1	0.15	0.5	3.65							1.7	2.05	2.4
0.45	1.4	0.2	0.55	0.45								0.25	0.35	0.25	0.4							0.5	0.1	0.75	0.6							0.15	1.1	0.6	1.1							2.55	0.8	0.25
0.3	0.85	0.9	0.6	0.55								1.15	0.2	2.05	0.1							0.35	0.9	0.15	0.15							0.15	0.55	1.25	0.3							1.35	1.35	0.35
0.4	0.15	0.7	0.35	0.1								0.85	0.8	0.85	0.85							0.6	0.4	0.1	0.1							0.4	0.15	1.05	0.45							2.25	0.5	0.6
0.35	0.65	0.15	0.1	1.85								0.25	0.15	0.4	0.2							0.15	0.1	0.8	0.25							0.7	1.35	0.3	0.35							1.1	0.8	1.35
0.35	0.25	0.25	0.3	0.5								0.1	0.25	0.1	0.2							0.2	1.65	0.5	0.35							0.3	0.6	0.4	0.8							1.75	0.9	0.6
1.5	0.1	1.35	0.25	0.1								0.1	0.55	1.7	0.65							0.45	0.2	0.6	1.05							0.95	4.4	1.55	0.9							0.8	0.45	1.05
1.2	0.25	0.45	0.55	0.1								1.1	0.25	1	0.1							1.35	0.3	0.55	1.85							0.65	0.2	1.9	1.35							0.45	0.85	0.45
1.1	0.9	0.1	0.2	0.15								0.95	0.15	0.35	0.1							1.4	0.95	0.15	0.4							0.15	0.3	1.15	0.55							0.5	2.8	2.35
0.65	0.4	0.15	0.15	0.3								0.2	0.2	0.15	0.75							0.1	0.4	0.2	0.1							0.25	0.45	0.7	0.25							2	0.15	0.85
0.2	0.2	1.5	0.2	0.1								0.15	0.4	0.2	0.45							0.45	1.15	0.1	0.45							0.25	0.3	0.3	0.25							1.8	1.95	0.95
0.2	0.55	0.25	0.8	2.1								0.1	0.15	0.25	0.15							1	0.2	1	0.85							0.15	2.95	0.55	0.1							0.8	0.35	0.35
0.1	0.15	0.4	0.35	1.1								0.15	0.1	1.95	0.5							0.55	1.2	0.35	0.8							0.2	0.2	0.2	0.8							0.45	0.25	1.3
0.4	0.8	0.15	0.1	0.1								0.6	0.15	0.55	0.15							0.25	0.55	0.1	0.1							0.35	0.1	0.9	0.9							0.4	0.8	0.3
0.5	2.6	0.1	0.75	1								0.15	0.25	0.6	0.35							0.9	0.15	0.85	1.2							0.55	0.7	0.15	0.35							0.7	0.1	2.65
0.45	0.4	0.6	0.3	0.7								0.6	0.3	0.6	0.3							0.2	0.35	0.25	0.4							1.25	0.1	0.25	1.45							0.1	0.3	0.25
0.45	0.1	3.4	0.3	0.6								0.75	0.2	0.45	0.1							0.15	0.85	0.2	0.35							0.3	0.15	0.75	0.35							0.4	0.55	3.1
0.15	0.4	0.1	0.1	0.3								0.35	0.35	1.1	0.1							0.1	0.2	0.45	0.6							0.1	0.3	1.45	0.25							1.85	2.3	0.4
0.1	0.45	0.8	0.1	0.8								0.6	0.7	0.3	0.65							7.85	0.45	1.6	0.45							1.9	0.45	1.4	0.25							1.15	5.2	0.1
1.05	0.35	0.95	0.15	0.55								0.25	0.2	1.45	1.1							0.8	0.9	0.1	0.3							2.45	2.55	0.3	0.55							1.65	0.3	0.35
0.1	0.15	0.4	0.2	0.1								0.2	1.85	1.75	1.1							0.95	0.35	0.1	0.2							0.75	0.3	0.9	0.8							0.3	0.3	0.65
0.95	0.35	0.75	0.35	1.55								0.1	0.15	1.35	0.35							0.25	0.7	2.05	0.1							2.5	1.35	0.5	1.6							0.15	0.2	2.85
0.55	0.15	0.2	0.75	0.3								0.2	0.15	0.95	0.5							0.1	0.3	0.2	1.15							0.2	2.55	1.35	0.3							1.1	1.6	1.6
1.95	0.25	0.65	0.25	0.25								0.3	0.3	0.5	1.35							0.2	0.5	0.3	0.35							0.35	2.9	1.7	0.15							0.1	0.25	0.35
0.15	0.15	0.2	0.15	0.1								0.45	0.3	0.15	0.1							0.65	1.25	2.9	0.25							1.05	0.5	1.25	0.1							1.65	0.3	1.05
0.25	0.15	0.6	0.85	0.1								0.55	0.4	0.1	0.55							1.6	0.5	0.65	1.25							0.7	0.4	0.45	0.4							0.65	0.65	0.35
1.1	1.25	0.45	1.25	0.15								0.15	0.4	0.2	0.4							0.15	0.3	0.8	0.25							0.75	0.1	0.85	0.2							0.35	0.8	0.35
0.1	0.15	1	0.25	0.35								0.35	0.2	0.1	0.35							0.25	1.35	0.3	0.2							0.45	0.75	1.1	0.1							0.2	1.5	0.4
0.15	0.5	0.2	0.35	0.25								0.25	0.5	0.6	0.1							0.95	1.05	0.25	0.25							2.25	0.6	0.3	0.5							0.2	0.2	2.9
0.3	0.75	2.15	0.25	0.25								0.65	0.2	0.1	0.7							0.15	0.15	1.7	0.45							0.25	0.35	0.25	0.4							0.6	1	0.4
0.5	0.2	0.35	0.4	0.75								0.9	0.3	1.3	1.55							0.3	0.65	1.55	0.95							0.15	0.1	1.05	0.15							0.55	1.95	0.25
0.15	0.4	0.25	0.6	0.65								0.45	1.35	0.5	0.5							0.35	0.35	1	0.1							0.2	4.7	0.1	1.15							0.35	0.45	0.8
0.2	1.35	0.1	0.1	0.1								0.95	0.55	0.15	0.3							0.3	0.65	0.75	0.3							1.3	0.9	1.25	2.25							1.9	0.75	0.15
0.15	0.1	0.5	0.1	0.1								1	0.1	0.35	1.05							0.35	0.8	0.55	1.25							0.2	0.15	1	0.1							0.15	0.15	1.25
0.4	0.35	0.35	0.1	0.25								0.15	0.1	0.2	0.3							0.75	0.15	0.15	0.55							1.75	1.6	0.95	0.25							1.55	0.15	4.25
0.1	0.1	0.2	0.75	0.15								0.2	0.2	0.55	0.2							1	0.25	1.45	0.15							0.6	0.95	0.1	0.5							0.95	0.85	1.9
0.15	0.25	0.3	0.1	0.8								0.35	0.2	0.15	0.45							1.6	0.75	0.4	0.3							1.55	2.55	0.8	3.15							0.5	0.55	2.3
1	0.45	0.1	0.1	0.5								0.15	0.15	0.1	0.1							0.25	0.8	1.9	0.25							0.15	0.55	1.05	1.3							1.2	1.45	0.4
0.1	0.45	0.15	0.8	0.4								0.15	0.55	0.55	0.5							2.1	0.35	1.35	0.65							1.5	0.3	0.15	0.45							0.15	1.05	0.5
0.15	0.3	0.1	1.15	0.9								0.25	1	0.1	1.7							0.45	3.05	1.9	0.15							0.7	0.25	2.2	0.5							0.65	1.3	0.1
0.35	1.75	0.25	0.2	0.35								0.3	0.15	0.55	0.7							0.3	0.6	1.25	0.35							0.6	0.4	0.1	2.5							0.5	0.1	0.15
0.25	0.3	0.55	0.3	0.1								0.75	0.15	1.2	0.1							0.35	1.25	0.25	0.35							0.7	2.35	1.8	2.45							0.1	0.55	0.2
0.5	0.65	0.25	0.8	0.7								1.3	0.55	1.95	2.45							1.15	0.35	0.4	1.7							2.25	0.9	1.15	4.7							2.6	3.75	1.15
0.9	0.6	0.15	0.4	0.25								1.75	0.2	1.55	0.25							0.2	0.15	0.15	0.45							0.25	0.45	1	0.15							0.45	0.15	0.6
2.15	1	2.25	0.35	0.25								0.3	0.45	0.2	0.9							0.35	0.15	0.45	1.4							0.2	0.8	0.3	0.8							1.15	0.15	0.35
0.1	0.45	0.25	0.2	0.1								0.25	0.25	0.55	0.4							0.45	1.55	0.25	0.3							0.45	0.7	0.85	4.2							1.95	1.7	1
0.6	0.15	0.5	0.2	0.6								0.35	0.75	1.6	0.35							0.2	0.45	0.1	0.35							0.1	0.2	1.25	0.6							0.95	0.55	0.25
0.35	0.2	0.2	0.5	0.1								0.55	0.15	1.05	0.3							1.2	0.15	0.3	0.25							0.15	1	0.6	0.15							0.25	0.1	0.1
0.2	1.1	1.25	0.1	0.9								0.75	1.35	0.7	1.8							1.55	0.15	0.4	0.15							0.1	0.35	1.1	0.6							0.25	0.1	2.25
0.5	0.3	0.15	0.25	2.45								0.2	0.35	0.1	0.95							1.85	0.75	0.6	0.2							0.25	0.65	0.5	0.5							0.85	0.3	0.85
0.25	0.1	0.3	0.45	0.4								0.8	0.6	0.1	0.3							1.25	0.2	0.4	0.85							0.4	0.15	0.15	0.1							0.85	0.2	0.7
0.25	0.25	0.85	0.45	0.95								1.05	0.1	0.2	0.5							2.05	0.35	1.75	0.8							0.1	0.85	0.55	0.4							1.8	1.05	0.55
0.2	2.55	0.1	0.15	0.15								0.1	0.3	0.15	0.1							0.9	0.25	0.1	1							0.7	0.3	0.1	0.9							0.4	0.75	0.7
0.8	0.3	2.95	0.25	0.2								0.3	0.55	1.2	0.2							1.1	0.85	0.9	1.2							0.9	0.8	0.2	0.3							1.75	0.35	0.7
0.25	0.3	0.8	0.4	0.1								0.4	0.15	0.45	0.1							0.85	2.45	0.3	0.35							2.65	4.3	0.35	2.9							2.4	0.2	1.15
0.15	0.1	1.25	0.6	0.15								0.15	0.35	0.5	0.75							0.85	0.65	0.25	0.3							0.9	1.7	0.6	0.4							0.45	1.35	0.7
0.3	0.4	0.35	0.15	0.65								1.85	1.05	0.1	0.3							0.3	0.1	0.35	0.3							1.05	12.4	0.85	0.1							0.2	0.1	0.2
0.35	0.3	0.5	0.35	0.2								0.2	0.2	0.25	1.2							0.3	0.6	0.4	0.4							0.65	0.8	0.85	0.95							2.05	1.2	2
0.15	0.9	0.15	0.15	1.75								0.35	0.2	0.3	0.4							0.55	0.75	1.05	0.3							0.35	1.85	0.2	1.25							0.15	1.7	1.1
0.15	0.2	1	0.1	0.2								0.2	0.45	0.2	0.25							0.45	0.35	0.1	0.5							0.9	0.35	0.8	0.15							2.65	0.15	0.75
0.3	0.5	0.85	0.1	0.2								0.1	1.2	0.1	0.7							0.25	0.15	0.1	0.55							0.9	0.2	1.1	0.8							0.95	1.95	0.1
0.4	1.3	0.25	0.4	0.2								0.45	0.3	0.1	0.8							0.3	0.8	0.7	1.1							0.7	0.45	1.9	0.2							2.15	0.55	1.7
0.1	1.65	0.1	0.2	0.3								0.2	0.5	0.25	0.45							0.95	0.8	0.4	0.4							0.35	0.4	1.35	0.95							1.45	0.65	6.35
0.45	0.35	0.25	0.2	0.5								0.3	0.25	0.4	0.6							0.25	0.35	0.1	0.15							0.1	0.75	0.25	0.9							0.55	0.15	0.7
0.1	0.25	0.25	0.5	0.1								0.15	0.15	0.2	0.1							0.1	0.5	0.95	0.25							0.3	0.95	0.1	0.15							1.95	0.2	2.5
0.25	0.9	0.15	0.1	0.1								0.3	0.45	0.25	0.4							0.45	0.55	0.45	1.35							4.25	0.7	2.35	0.35							0.3	0.35	0.25
0.7	1.65	0.3	1.4	1.55								0.1	0.2	1.3	0.25							0.25	0.95	0.1	0.8							1.65	1.5	1.85	1.9							0.25	0.35	0.35
0.8	0.8	0.1	0.1	0.4								0.3	0.3	0.1	0.25							0.15	0.85	0.45	1.05							0.1	0.9	0.4	0.5							5	0.4	0.2
0.8	0.65	0.1	0.4	0.35								0.95	0.85	0.2	0.25							1.95	0.55	0.35	0.3							1.15	2.7	0.25	0.2							0.3	1.3	2.15
0.1	0.25	0.3	0.15	0.75								0.2	0.9	0.15	0.65							1.3	0.25	1	0.2							0.1	0.2	1.15	0.1							0.35	2.15	0.55
0.75	0.15	1.15	0.2	0.2								1.8	0.25	0.3	0.45							1.85	0.15	0.7	0.15							3.25	0.2	0.4	0.85							0.9	0.15	0.65
0.4	0.1	0.1	0.25	0.1								2.1	0.8	0.55	0.3							0.3	0.15	0.9	0.75							0.75	0.35	0.45	0.55							3.4	3.45	0.45
0.85	0.1	0.4	0.45	0.95								0.45	0.35	0.35	0.1							0.1	0.15	0.9	0.45							3.35	1	0.3	0.1							0.1	0.25	0.15
0.1	0.65	0.85	0.35	1								1.1	0.15	0.65	0.75							0.35	0.65	0.1	0.15							0.7	0.1	0.1	0.15							0.1	1	0.1
0.45	0.4	1.6	0.2	1.1								0.25	0.15	0.5	0.15							0.45	0.2	0.5	0.65							0.15	0.4	1.8	0.35							0.7	2.1	0.4
0.15	0.15	0.75	0.65	0.6								0.15	1.25	0.1	0.25							0.45	0.45	0.1	0.35							0.1	0.2	0.1	2.55							0.1	0.7	1.15
1.05	0.35	0.25	0.3	0.35								0.55	0.4	0.55	0.35							1.85	0.1	0.1	1.15							0.7	0.5	0.9	0.1							0.85	0.75	0.2
0.2	0.75	0.1	0.1	0.1								0.45	0.2	0.4	1.85							1.25	0.1	1.7	0.3							1.1	0.15	0.3	0.3							3.15	0.6	0.45
0.25	0.1	2.95	0.2	0.85								0.5	0.15	0.55	0.45							0.25	0.4	0.35	1.9							0.2	1.75	1.3	0.25							0.35	0.95	0.8
0.2	0.15	0.25	0.6	0.15								0.15	0.1	0.1	0.1							0.15	0.55	1.1	0.2							0.1	0.35	0.45	0.1							0.35	2.35	0.25
0.45	0.6	0.85	0.5	1.4								0.1	0.25	0.25	0.15							0.4	0.15	0.4	1.2							0.95	0.35	0.2	0.7							2.6	1.4	0.15
0.85	0.35	1.45	0.35	0.8								0.7	0.25	0.8	0.6							2	1	0.45	0.5							0.5	0.4	0.55	0.4							0.4	0.25	3
0.1	0.95	0.35	0.7	1.2								0.35	0.3	0.4	0.4							2.5	0.35	0.25	0.95							0.35	0.3	1.3	1.65							0.2	0.45	0.55
0.15	0.15	0.1	0.15	0.8								0.7	0.15	0.2	0.7							0.25	0.4	0.95	0.55							0.65	0.7	0.6	0.55							1.7	1.3	1.95
0.95	0.15	1.15	0.95	0.3								1.2	0.6	0.4	1.1							0.25	0.35	0.55	0.1							1.6	0.1	0.15	0.65							1.15	2.45	2.05
0.7	0.35	0.65	0.1	0.15								0.1	0.75	0.15	0.1							0.15	0.6	0.75	1.1							2.5	0.1	0.7	0.2							0.4	0.2	0.8
0.1	0.7	0.15	0.2	0.85								1	0.75	0.4	0.5							0.5	0.1	0.8	1.1							0.2	0.45	0.6	0.35							2.3	1.45	0.55
0.15	0.2	0.55	0.15	0.2								0.5	0.15	0.1	0.4							0.9	1.3	2.9	1.1							0.95	2.05	3.75	2							1.25	0.1	0.85
0.25	0.7	0.2	0.6	0.15								0.15	0.1	0.3	2.3							0.4	1.45	1.1	0.35							0.2	1.05	1.25	0.55							2.55	0.1	0.3
0.1	1	0.45	1.25	0.7								0.1	0.7	1.7	0.6							0.5	0.15	0.3	0.85							0.1	0.3	1.45	0.25							0.2	1.05	0.3
1.2	0.1	0.2	0.85	0.1								0.7	0.1	0.3	0.45							1.45	0.15	0.1	1.55							0.1	0.9	0.65	0.3							0.65	0.8	1.8
0.25	0.1	0.15	0.55	0.45								2	0.25	0.4	0.1							0.7	0.1	0.35	1.25							0.2	3.15	2.6	0.4							0.4	0.4	2.95
0.25	0.6	1.05	0.1	0.15								0.15	0.65	0.2	0.35							0.3	0.35	0.6	0.2							0.25	2.05	3.05	0.65							0.15	0.2	0.35
0.5	0.1	0.45	0.1	0.9								1.7	0.35	0.2	0.15							0.95	0.45	0.25	0.1							0.25	0.2	2.4	0.25							0.55	0.25	1.6
0.65	0.1	0.15	0.15	0.1								0.45	1.2	1.2	0.85							0.15	0.45	0.55	0.6							0.8	1.25	0.15	0.15							0.65	2.75	0.7
0.55	0.45	0.65	1.5	0.4								0.8	1.15	0.3	0.45							0.15	1.25	1.65	0.2							0.15	2.5	0.55	0.25							0.9	1.55	0.3
0.2	0.25	0.2	0.5	0.25								0.1	0.25	0.45	0.1							2.8	0.15	0.25	0.25							0.15	1.25	0.95	0.45							0.1	0.8	1.4
0.3	1.1	0.75	1.9	1.75								0.8	0.55	0.65	0.45							0.2	1	0.25	0.45							1.1	0.1	0.45	0.35							0.25	0.65	0.35
0.15	0.1	0.3	0.3	0.3								1.35	0.2	1.8	0.3							0.95	0.6	0.5	0.1							0.3	0.3	1.25	1.85							0.15	2.15	0.15
0.2	0.45	0.55	0.3	0.15								0.35	0.1	0.3	0.15							0.1	0.1	0.15	0.25							0.8	0.95	0.2	0.25							0.35	3.1	0.6
0.1	0.15	1.55	0.2	0.2								0.7	0.35	0.55	0.1							0.2	0.1	0.4	0.4							1.65	1.65	1.5	0.2							0.45	3.3	0.95
0.1	0.45	0.7	0.1	0.4								0.25	0.85	0.1	0.25							0.4	0.35	0.1	0.3							1.2	0.35	0.35	0.3							0.45	1.4	0.15
0.7	0.7	0.65	0.45	0.6								2	0.15	2.5	1.2							0.6	0.45	1.25	1.8							1.05	0.3	0.5	0.5							3.1	1.55	0.7
1.65	0.25	0.7	0.35	0.95								0.4	0.1	1.15	0.1							0.35	0.35	0.25	0.15							2.05	0.7	0.2	0.35							0.4	0.85	1
0.3	0.45	0.15	0.15	0.65								0.2	0.4	0.6	0.9							0.1	0.15	1.6	1.1							0.45	0.35	0.8	0.25							0.35	0.5	0.5
1	0.1	0.1	0.35	0.1								0.2	0.35	0.25	0.35							0.35	0.1	0.1	0.4							0.15	0.4	0.15	0.4							2.5	0.4	0.7
0.2	0.1	0.4	0.3	0.4								0.65	1.6	0.4	1							0.75	0.6	0.1	0.3							0.65	0.65	1.7	0.15							0.65	0.15	1.6
0.45	0.35	0.15	1.05	0.6								0.55	0.35	0.25	0.85							0.4	2	1.75	0.6							0.35	0.65	1.25	0.3							0.6	1.65	2.15
0.15	1.25	0.2	0.35	0.25								0.3	0.25	0.6	0.6							0.1	0.6	1.05	0.45							0.1	0.1	1.25	1.45							1.8	0.95	0.5
0.9	0.1	0.45	0.25	0.1								0.35	0.35	0.45	0.15							0.3	0.9	0.25	0.45							0.1	0.45	1.1	2.45							0.2	3.4	0.25
0.5	0.15	0.2	0.2	0.45								0.3	0.1	0.4	0.15							0.45	0.15	0.2	0.15							0.4	0.95	0.15	1.6							2.6	0.25	0.5
0.4	0.1	0.35	1	0.1								0.15	0.1	0.35	0.65							0.1	0.4	0.65	0.55							0.1	1.85	0.55	0.25							1.25	1.05	0.45
0.25	1.2	0.45	0.25	0.1								1.05	0.15	0.1	0.6							0.7	1.95	0.1	0.45							0.6	0.15	0.15	0.1							0.6	0.3	0.65
0.8	0.45	1.25	1.05	0.4								0.3	0.15	1.1	0.6							0.2	0.55	1.05	1							0.15	0.1	0.15	0.2							1.1	0.8	0.15
0.25	0.25	0.25	0.5	0.45								0.6	0.55	0.4	0.2							0.1	1.2	1	0.15							0.2	0.45	1	0.1							0.1	0.9	2.7
0.2	0.3	1.65	1.35	1.05								0.65	0.1	0.9	0.65							0.1	0.55	2.55	0.2							0.2	0.45	0.1	0.1							0.95	1.9	2.75
0.7	1.45	0.35	0.1	0.85								0.55	0.15	3.8	0.4							0.4	2.15	0.1	0.55							0.95	3	0.55	1.1							3.3	1.25	5.25
0.25	0.4	0.15	0.35	0.3								0.1	0.2	0.2	0.1							0.85	0.55	0.15	0.45							0.15	0.35	0.2	0.2							2.1	0.15	0.4
0.15	0.2	0.55	0.3	0.6								0.15	0.1	1	0.15							0.15	0.45	0.2	0.8							1	2.1	0.25	0.55							3.75	0.2	1.55
0.4	0.1	0.7	0.3	0.15								0.55	0.4	0.1	1.9							1	0.1	0.45	0.45							0.1	0.4	1.05	0.85							0.1	0.35	1.25
0.3	0.5	0.1	0.85	0.4								1.25	0.5	0.15	0.3							0.45	0.15	0.2	0.15							1.35	0.3	1.4	0.2							0.3	1.1	0.65
0.55	0.3	0.25	0.35	1.05								1.4	0.15	0.35	0.8							1.75	0.25	0.25	0.7							0.65	1.2	0.25	0.1							0.8	1	0.55
0.6	2.25	0.25	0.65	0.2								1.5	0.1	0.55	0.45							0.2	1	0.4	0.1							0.2	0.25	0.8	0.3							0.65	1.7	0.1
0.25	0.1	0.1	0.4	1.3								0.55	0.25	0.25	0.1							0.95	0.3	1.2	0.7							0.45	1	0.75	0.6							0.7	0.65	0.15
0.45	0.95	0.2	1.1	0.25								0.6	0.9	0.4	1.9							0.5	0.35	0.5	0.8							3.3	1.25	0.15	0.55							0.2	0.4	0.85
0.25	0.95	0.4	1.2	0.65								0.15	0.15	0.55	0.1							0.6	0.25	0.15	0.2							0.9	0.1	0.9	0.15							1.5	0.45	0.15
0.85	0.25	0.2	0.35	0.6								0.6	0.1	0.1	0.95							0.6	0.35	0.15	0.25							1.75	1.5	0.6	0.45							1.1	0.5	0.5
0.35	0.55	0.7	0.75	0.15								2	0.35	0.1	0.1							0.25	0.2	0.1	0.5							0.2	0.1	0.65	0.35							0.9	0.1	1.5
0.1	0.1	0.4	0.65	0.35								1.45	0.45	0.2	1.25							0.1	0.1	0.55	0.2							0.3	0.25	1.55	0.75							1.2	1.25	2.75
0.35	0.1	0.4	0.1	0.55								0.35	0.75	0.95	0.85							0.6	0.45	0.3	0.2							0.4	0.9	3.55	0.9							0.3	0.2	3.3
1.15	0.7	0.3	0.2	0.2								0.1	0.1	0.45	0.6							0.85	1.25	0.1	0.15							0.95	1.55	0.75	0.1							1.15	2.65	0.2
0.25	0.5	0.55	0.3	0.85								0.15	0.8	0.75	0.2							0.85	0.55	1.1	0.75							1.25	0.2	1.15	2.55							0.95	0.85	0.1
0.5	0.15	0.25	0.1	0.4								0.5	2.1	0.55	0.45							0.6	0.35	0.7	1.75							0.6	0.15	0.15	0.45							1.85	0.2	0.6
0.1	0.4	0.15	0.8	1.55								0.7	0.8	0.55	0.25							0.25	0.1	0.55	0.1							0.45	0.35	0.8	0.4							0.1	0.45	0.4
1.5	0.55	0.25	1.25	0.15								0.55	0.1	1.3	1.4							0.2	0.3	0.1	0.55							2.1	1	1.35	0.1							2.7	0.2	0.1
0.1	0.2	0.25	0.25	0.1								1.25	0.15	0.15	0.85							0.15	1.15	0.8	0.3							0.95	0.75	0.15	0.35							1.45	0.45	1.15
0.4	0.5	0.3	0.4	1.05								0.95	0.3	0.1	0.45							0.2	0.55	0.15	0.65							0.75	0.25	0.35	0.35							2.95	1.6	1.7
0.15	0.3	0.65	0.75	0.25								0.35	0.2	0.5	0.25							0.3	0.25	0.5	0.2							0.6	1.8	0.35	0.75							0.1	0.3	1.55
0.6	0.15	0.35	0.45	0.35								0.15	0.15	1	0.1							0.15	0.1	0.3	1.9							0.4	4.75	0.4	1.25							1.1	0.6	2.3
0.35	0.45	0.15	0.3	0.75								0.45	1.5	0.55	0.3							1.6	0.3	0.3	0.25							2.1	1.5	0.75	0.15							1.15	1.6	0.95
0.15	0.1	0.1	0.2	0.35								0.4	0.85	0.15	0.15							1.4	0.35	0.6	0.8							0.15	2.05	0.2	0.65							2.45	0.75	0.75
0.6	0.2	0.1	0.1	0.1								0.45	0.7	0.35	1.6							0.95	0.65	1.1	0.5							0.65	1.55	0.35	3.75							0.25	9	1.6
0.25	0.35	0.6	0.15	0.3								0.3	0.3	0.5	0.75							0.55	0.2	0.35	0.75							0.15	0.7	0.15	0.15							0.35	0.15	0.7
0.1	0.1	0.15	0.2	0.6								0.8	0.15	0.45	0.15							0.25	0.55	0.1	1.05							1.2	0.25	0.9	1.65							0.55	0.3	0.45
0.25	0.15	0.45	0.2	1.65								0.35	0.6	0.4	1.2							0.1	0.1	0.8	1.15							0.85	0.2	0.25	0.25							0.1	1.3	1.35
0.15	0.1	0.55	0.9	0.5								0.95	0.6	0.55	0.1							0.2	0.5	0.85	0.15							0.4	0.45	0.15	1.2							0.6	0.6	1.1
0.4	0.2	0.15	0.3	1.1								2.95	0.75	0.35	0.2							0.95	1.2	0.1	0.3							1.75	0.3	0.55	0.5							1.05	0.85	5.05
0.7	0.1	0.15	0.2	0.35								0.9	0.1	0.45	0.3							1.15	0.25	1.25	0.1							0.5	0.55	0.35	1.4							4.4	0.35	0.9
0.3	0.7	0.55	0.55	0.45								0.9	0.15	1.75	1.4							0.35	0.75	0.15	0.8							0.45	0.4	0.1	0.25							0.15	1.55	0.55
0.7	1.3	0.15	0.5	0.4								0.35	1	0.4	0.7							0.1	0.3	0.35	2.45							0.15	0.5	0.1	0.1							0.1	0.1	1.25
0.5	0.15	0.45	1.1	0.1								0.2	0.25	0.1	0.2							0.3	1.9	0.2	0.65							0.2	0.8	2	2.45							0.1	2	0.25
0.2	0.3	1	0.95	0.1								0.3	0.2	0.85	0.1							0.2	1.15	1.15	0.2							0.25	0.1	0.2	0.35							0.35	0.15	0.25
0.1	0.3	0.35	0.45	0.45								0.35	0.2	0.65	0.3							0.1	0.45	0.6	0.1							0.65	0.95	1.55	0.2							0.2	0.1	0.55
0.2	0.7	0.15	0.35	0.1								0.85	1.5	0.35	0.6							0.5	0.65	1.05	1.7							0.55	2.4	0.15	0.5							0.3	0.55	0.55
1.45	0.1	0.1	0.25	0.75								0.1	0.85	1.15	0.55							0.25	0.95	0.15	0.2							1.2	0.1	0.85	1.45							1.4	0.2	1.15
0.6	0.1	0.3	0.2	0.1								0.4	0.4	0.1	1							0.6	0.6	0.35	0.25							0.2	0.2	0.8	1.15							2.45	0.5	1.05
0.6	0.4	0.35	1.35	0.55								0.65	0.6	0.35	0.45							0.15	0.3	1.25	0.4							0.2	0.45	3.9	0.35							1.05	2	0.4
0.25	0.45	0.15	0.15	0.15								0.6	0.25	0.1	0.2							0.55	0.7	3.6	0.1							0.6	1.3	0.8	0.35							0.95	0.8	1.25
0.4	0.1	0.15	0.25	0.25								0.3	0.1	0.45	0.25							0.6	2.55	0.45	0.3							0.4	2.2	0.75	0.1							0.65	0.35	0.4
0.7	0.3	0.85	0.9	0.1								0.1	0.1	0.1	0.55							0.3	2.05	1.25	0.1							1.9	0.3	1.15	0.4							1.25	1.15	0.85
0.1	0.25	0.1	0.1	1								0.95	0.15	1.25	1.6							2.3	0.65	1.55	2.9							1.6	0.65	0.15	4.9							2.1	0.5	0.35
1.1	0.9	0.95	0.3	0.15								0.3	0.65	0.15	0.3							0.15	0.1	0.1	0.45							1.35	0.6	0.4	0.25							0.25	0.35	0.7
0.1	0.6	0.15	0.2	0.3								0.6	0.45	0.45	0.7							0.5	0.5	0.35	0.8							0.15	0.9	0.3	0.35							0.55	0.7	0.35
0.15	0.65	0.25	0.5	0.15								0.15	0.15	1.8	0.55							0.75	0.2	2.3	0.55							0.25	0.35	1.6	0.2							3.45	0.65	7.9
1.3	0.15	0.2	0.95	0.35								0.6	0.25	0.6	0.6							0.2	0.1	0.35	0.15							0.35	0.8	0.3	0.2							0.5	2.9	9.35
0.35	0.35	0.1	0.4	0.1								0.1	0.1	0.15	0.15							0.35	0.2	0.15	0.45							0.1	0.55	0.3	0.15							0.55	0.8	0.7
0.35	0.75	0.15	0.4	0.15								0.15	0.1	1.9	0.6							2.75	0.35	0.2	0.6							0.5	1.05	0.25	1.25							2.05	0.15	0.15
0.2	0.6	0.45	0.4	1.85								0.4	0.65	0.2	0.4							0.15	0.1	1.6	0.1							1.25	0.65	0.1	0.6							0.85	0.5	0.5
2.15	0.6	0.45	0.5	0.7								0.2	0.65	0.65	0.25							0.15	1.75	0.1	0.1							0.4	0.7	0.25	0.45							0.55	0.4	0.1
0.25	0.15	0.15	0.9	0.15								0.1	0.25	0.15	0.2							1.5	0.95	0.95	0.85							0.55	1.15	2.7	0.4							0.75	0.15	1.5
0.5	0.1	0.25	0.3	0.2								1.6	0.85	0.15	0.15							0.75	0.45	0.35	1.45							0.65	0.7	0.2	1.3							2.2	0.7	0.8
0.15	0.8	0.15	0.15	0.15								1.25	0.3	0.15	0.25							0.35	2.7	0.55	0.65							0.5	3.55	0.85	0.1							0.3	0.45	0.5
0.4	0.65	1.75	0.25	0.25								0.55	0.1	0.1	1.05							0.6	0.9	0.15	0.8							0.65	0.25	0.65	0.2							0.55	0.35	0.7
0.4	0.3	0.75	0.4	0.25								0.2	0.8	1.7	1							0.7	0.25	0.5	1.8							0.2	0.45	3.55	0.95							0.95	0.25	0.35
0.25	2.6	0.3	0.1	0.1								1.15	0.3	1.1	0.5							0.35	0.55	2.15	0.2							0.25	0.7	1.4	0.3							2.45	0.3	2
0.15	0.1	0.2	0.2	0.25								0.7	0.3	0.25	0.1							1.1	0.35	0.45	0.2							0.4	0.2	0.3	1.3							0.3	0.6	0.8
2.4	0.1	0.15	1.2	0.1								0.15	0.35	0.2	1.35							0.15	0.35	0.55	0.5							1.35	1.3	0.85	0.5							0.5	0.95	1.05
1.15	0.1	0.3	0.4	0.45								0.45	0.4	0.4	0.65							0.75	0.15	2.2	2.25							0.3	1.05	2.4	0.25							0.35	0.55	1.25
0.15	0.3	0.75	0.25	0.35								0.95	0.25	0.1	0.4							0.5	0.2	0.2	0.15							0.15	1.05	0.8	0.5							0.55	1.45	2.5
0.15	0.9	1.15	0.15	0.4								0.3	0.35	0.75	0.25							0.25	0.45	0.7	0.45							0.25	0.7	0.25	0.3							0.15	0.15	1.3
0.2	0.1	0.15	0.1	0.1								0.25	0.15	0.15	0.35							1.35	0.15	0.5	0.75							0.45	0.75	0.7	2.9							0.2	0.25	0.8
0.1	0.8	0.8	0.5	0.1								0.25	1.05	0.2	0.1							0.3	1.3	0.3	0.5							0.7	0.25	0.75	1.3							0.3	0.5	0.95
0.15	0.3	0.6	0.3	1.55								1	0.1	0.6	2.5							1	0.15	0.1	0.5							0.1	0.4	1.05	0.45							1.45	3.3	1.05
1.45	0.5	1	0.3	0.15								0.1	0.2	0.25	0.25							0.1	0.25	0.9	2.05							3.15	0.15	0.3	0.45							1.75	0.15	0.2
0.1	0.25	0.45	0.25	1								0.75	4	0.3	1.65							0.2	0.1	1.7	1.15							0.6	0.1	2.45	2.1							1.35	0.4	0.2
0.65	1.45	0.65	0.4	0.2								0.25	0.25	0.2	0.25							0.15	0.85	0.6	0.15							0.15	0.15	0.5	0.2							1.4	0.55	4.6
0.1	2.3	0.8	0.2	0.2								1.3	0.85	0.5	0.2							0.35	1.65	0.1	1.75							0.3	2.55	2.45	0.8							0.95	0.2	0.1
1.95	0.45	0.35	0.1	0.35								1.05	0.75	0.55	0.7							0.3	1.25	0.15	0.15							0.75	0.35	0.4	0.1							2.9	0.2	0.5
0.15	0.5	0.25	0.9	0.1								0.15	1.25	0.5	0.1							0.1	1.45	0.35	0.3							0.55	0.5	0.45	0.3							2.3	1.25	0.35
0.1	1.2	0.25	0.35	0.4								0.3	0.25	0.4	0.15							0.35	0.2	0.5	0.7							0.45	0.35	2.75	0.25							3.15	0.1	0.5
0.75	0.3	0.25	0.7	0.25								0.2	0.1	0.6	0.5							1.55	3.35	0.15	0.55							4.7	0.5	2.35	1.2							0.95	2.3	1.55
0.2	0.6	1.55	0.1	0.15								1.5	0.2	0.1	0.2							1.45	0.1	0.25	0.3							1.05	1.9	0.75	0.25							0.3	7.2	0.1
0.65	0.15	0.75	0.3	0.2								0.55	1.65	1.15	0.4							0.3	0.3	0.85	0.4							2.15	0.1	1.05	0.95							0.1	1.75	0.5
0.1	0.25	0.1	1.45	0.45								0.15	0.15	0.8	0.2							0.6	1.1	1.35	0.1							2.25	0.3	0.1	2.9							5.95	0.55	3.2
1.55	1.15	0.3	1.25	0.55								1.05	0.25	0.5	0.5							0.25	0.8	0.1	0.2							0.35	0.45	0.35	0.4							1.1	0.2	0.75
1.05	1.15	0.65	0.1	0.95								0.1	1	0.95	0.25							1.1	0.45	0.95	0.6							0.75	0.2	0.9	0.15							0.35	0.15	1.7
0.2	0.3	0.3	0.2	1.6								0.1	0.65	0.35	0.15							1.4	1.8	0.6	1.2							4.3	0.1	0.2	1.2							0.2	1.45	0.65
0.15	0.4	0.25	0.1	0.25								0.95	1.4	0.2	0.1							0.8	0.3	2.3	0.15							0.5	0.4	1.25	0.55							1	0.1	0.9
0.25	0.4	0.2	0.7	1.25								0.1	0.15	1.05	0.65							1.85	0.1	0.15	0.5							2.8	0.3	0.45	0.6							0.1	1	4.15
0.15	0.15	1.15	0.35	1.3								1	0.2	0.3	0.85							0.1	0.15	0.15	0.45							1.55	1.3	1.2	0.75							0.45	1.65	0.65
0.15	0.2	0.75	0.3	0.7								0.45	0.25	0.25	0.85							0.3	0.35	2.15	1.95							1.45	0.25	0.5	1.55							0.65	0.1	1.3
0.15	0.7	0.2	0.35	1.65								0.45	1.2	0.3	0.15							0.2	1	0.55	0.1							0.1	1.95	1	0.4							0.45	0.1	2.7
0.4	0.15	0.9	0.25	0.65								1	0.1	0.55	0.15							0.15	0.15	0.15	0.25							0.1	0.45	0.15	3.05							0.95	1.55	0.1
0.8	1.9	1.1	0.6	0.35								0.85	0.2	1.05	2.5							0.35	0.6	0.15	0.1							0.3	0.1	0.65	0.55							0.6	0.85	0.65
0.25	0.5	0.15	0.35	0.7								0.1	0.1	0.4	0.45							0.3	1.05	1.2	0.8							0.65	0.1	0.15	0.7							0.5	0.6	1.15
0.55	0.95	0.35	0.9	0.1								0.2	0.4	0.1	0.1							0.25	0.6	0.1	0.35							0.4	0.1	1.8	1.9							1.5	1.8	0.75
0.1	0.7	0.35	0.1	0.1								0.15	0.35	1.6	0.75							0.25	0.2	0.55	0.75							0.65	0.55	0.15	0.25							0.7	1.15	9.4
0.75	0.2	2.8	1.15	0.9								0.2	0.1	0.4	0.5							0.1	0.55	0.45	0.2							0.4	2.7	3.5	0.6							0.15	0.45	1.25
0.55	0.3	0.25	0.35	0.15								1.2	0.15	0.25	0.55							0.8	0.35	0.4	0.15							2.55	0.1	0.8	2.15							1.35	0.15	0.15
0.4	0.2	1.05	0.65	0.25								0.2	0.3	0.45	1.25							0.65	0.3	1.35	0.85							0.2	0.1	1.5	1.5							0.45	0.4	1.55
0.3	0.2	0.15	0.6	0.25								0.1	0.1	2.15	0.15							0.15	0.1	0.85	0.55							0.2	2.05	0.8	1.1							0.15	0.35	0.5
0.3	0.45	0.5	0.1	0.4								0.1	3.85	0.1	0.5							0.1	0.2	0.15	2.15							0.65	1.95	0.25	0.4							0.8	0.65	0.55
1	1.35	0.25	0.15	0.2								0.4	0.1	1.2	1.9							0.25	0.15	3.75	0.2							0.1	0.65	1.75	0.85							2.3	0.35	0.6
0.95	0.35	0.45	0.1	0.55								0.15	0.15	0.25	0.15							0.35	0.7	1.05	0.65							0.7	1.15	0.35	0.2							0.45	0.95	0.9
1.6	0.5	0.4	0.3	0.4								1.6	0.1	1.45	0.25							0.15	0.2	0.95	0.6							0.35	0.2	4.55	1.1							0.75	0.4	1.4
1	0.25	0.1	2.4	0.1								0.15	0.1	0.35	0.15							0.6	1.45	0.5	0.25							0.3	0.5	1	0.55							0.8	1.55	0.8
0.4	0.45	0.75	0.15	0.35								0.25	0.75	0.6	0.25							0.1	0.6	0.55	0.45							0.7	1.55	0.25	0.4							1.2	1.95	0.1
0.15	0.1	0.15	0.9	0.55								0.25	0.25	0.6	0.1							0.3	0.7	0.75	2.45							0.5	0.3	0.2	0.15							0.4	1.9	1.9
0.25	0.1	0.55	0.45	0.5								0.25	0.5	0.55	0.1							0.55	0.8	1.9	0.1							0.9	0.45	1.6	0.95							0.1	1.3	0.65
0.35	0.85	0.15	0.45	0.1								1.25	0.3	0.55	0.15							0.85	0.7	1.95	0.1							2.75	0.2	0.15	2.2							0.6	0.2	0.45
0.3	0.1	0.1	0.2	0.3								0.2	1.1	0.1	3.05							0.25	0.75	0.95	1.45							0.8	1.15	0.2	5.45							0.65	2.1	3.25
0.7	0.1	0.25	0.1	0.25								0.35	0.45	0.3	0.65							0.15	0.4	0.65	0.8							0.75	1.15	0.25	0.35							0.5	1.3	1.9
0.5	0.15	0.1	0.2	0.5								0.25	1.25	0.2	0.4							1.05	0.7	0.7	0.8							1.1	0.55	0.45	0.3							1.4	0.55	1.15
0.25	0.2	0.15	0.15	1.1								0.15	0.15	0.5	0.4							0.1	0.45	0.1	0.2							0.6	0.2	0.1	0.7							0.15	0.4	1.4
0.4	0.15	0.15	0.2	0.15								0.2	0.5	0.25	0.95							0.65	0.2	0.3	0.5							0.2	1.55	0.5	0.4							1.2	1.5	1.15
0.1	0.5	0.1	0.1	0.1								0.3	0.1	0.55	0.3							0.15	0.45	0.2	0.35							0.2	0.15	0.1	0.2							0.15	1.7	2.05
0.5	0.4	0.4	0.2	0.2								0.25	0.45	0.8	0.55							0.15	0.2	0.6	0.25							0.65	0.1	1.1	0.85							2.15	0.35	0.25
0.3	0.35	0.45	0.65	0.25								1.85	0.9	0.5	0.15							0.55	0.15	0.45	0.1							0.5	0.5	0.3	0.2							2.15	6.3	0.2
0.1	0.65	0.15	0.25	0.3								0.2	0.15	0.4	1.3							0.1	0.45	0.3	0.7							0.15	0.9	2.8	0.95							0.4	0.6	0.25
0.25	0.1	1.4	1.3	1.8								0.65	0.8	0.6	1.05							1.65	0.2	0.55	0.2							0.6	0.3	2.4	0.35							0.45	0.55	0.25
0.4	0.65	0.15	0.45	0.15								0.2	0.3	0.3	0.1							0.3	0.35	1.15	0.45							0.5	0.75	0.2	0.3							0.3	0.85	3.25
0.7	0.6	0.15	0.3	0.6								0.1	0.1	0.3	0.15							0.25	0.6	1.5	1.15							2.1	0.35	1.4	2							4.1	0.85	0.1
0.5	0.65	0.5	0.35	0.15								0.2	0.25	0.2	0.4							3.65	0.65	0.55	0.55							1.35	1.45	0.2	0.75							0.15	1.15	0.55
0.2	0.45	0.7	0.85	0.2								0.1	0.25	1.8	0.2							0.1	0.8	0.15	0.4							0.45	0.1	1.75	1.2							0.45	0.85	1.2
0.4	1.6	0.7	0.5	0.15								1.1	0.1	0.6	0.25							0.25	0.55	0.1	0.3							2.5	0.9	0.85	0.95							3.8	1.4	1.6
0.35	0.1	0.3	0.25	0.35								0.15	0.25	0.35	0.1							0.5	0.25	0.6	0.25							0.25	1.75	1.3	6							0.5	0.15	0.15
0.1	0.1	0.1	0.3	0.6								1.4	0.15	1	0.7							1.15	0.7	0.7	0.55							2.3	1.45	0.5	0.1							0.6	0.2	0.45
0.45	0.1	0.55	0.35	0.15								0.2	0.1	0.55	0.2							0.4	0.65	0.4	0.25							0.3	1.25	1.55	0.8							2.4	0.4	0.45
0.15	0.7	1.2	0.75	0.1								1.6	0.15	1.6	0.15							0.5	2.25	0.5	0.5							0.35	0.4	0.75	0.1							0.7	2.7	0.25
0.4	1	0.6	0.2	1.1								0.25	0.2	2	0.1							0.25	1.3	0.25	0.2							0.4	1.05	0.45	5.05							1.75	0.4	1.6
0.3	1.05	0.25	0.25	0.25								1.15	1.05	0.5	0.35							0.2	0.15	0.6	0.6							0.55	0.85	1.4	0.55							0.4	1.05	3.7
0.6	1.45	0.45	0.2	0.15								0.1	0.25	0.2	0.15							0.25	0.9	0.15	0.5							0.8	0.2	2.8	0.3							1.5	0.5	0.3
0.35	1.85	0.2	0.65	0.35								0.15	0.55	0.1	0.4							0.35	1.05	0.5	0.1							0.25	0.45	1.5	0.9							0.1	0.65	2.95
0.3	0.1	0.35	0.1	0.5								1	0.2	1.05	0.25							0.35	0.6	0.55	0.1							1.9	2.4	3.95	0.55							1.25	1.3	0.45
2.1	0.2	0.15	0.3	0.1								0.6	0.65	0.2	0.25							0.2	0.8	0.95	0.3							3.85	9.1	0.75	0.25							0.3	0.7	1.35
0.35	0.4	0.75	0.75	0.2								0.25	0.75	0.2	0.2							0.2	0.25	0.3	0.25							2	0.2	0.45	0.5							0.4	0.35	2.7
0.5	0.9	0.9	0.55	1.15								0.1	0.95	0.25	0.2							0.85	0.35	0.9	0.45							0.4	0.2	1.05	0.25							0.4	0.6	0.35
0.4	0.7	0.1	0.15	0.1								0.2	0.45	0.25	0.45							0.1	0.6	0.4	0.4							0.3	0.4	0.25	0.7							0.25	0.25	1.85
1.5	1.3	0.2	0.1	7.85								0.3	0.45	0.5	0.1							0.15	0.6	0.95	0.75							0.65	0.65	1.3	0.2							0.95	0.35	0.25
0.1	0.15	1	0.95	1.3								0.55	0.2	0.4	0.4							1.5	3.15	1.4	0.3							0.75	0.35	0.6	0.3							1.15	1.85	0.6
0.15	0.3	0.25	0.6	0.25								0.3	0.15	0.1	0.25							0.2	0.6	1.2	0.45							1.4	1.15	1.1	0.65							1.3	0.3	0.95
0.3	0.3	0.75	0.75	0.4								0.5	0.1	0.35	0.75							0.15	0.45	0.8	1.15							1.3	0.25	2.2	0.35							0.6	1.1	0.15
0.6	0.15	0.5	0.15	1.85								0.45	0.45	0.3	0.35							0.4	0.25	0.95	3.1							0.5	1	0.15	1.6							1.55	1.5	3.9
0.15	0.9	0.65	0.6	0.3								1.15	3.05	0.1	0.65							0.1	0.25	1.1	0.15							0.65	0.15	0.3	0.7							1.45	0.1	0.4
0.5	0.75	0.6	0.7	0.15								0.55	0.45	0.2	0.4							1.05	1.6	0.25	0.95							0.65	0.1	1.8	0.7							1.5	0.25	1.35
0.15	0.3	8.45	0.25	0.6								0.2	0.15	0.1	0.4							0.55	0.35	0.15	0.15							1.35	0.75	0.25	0.1							1.65	2.15	0.15
0.1	1.3	0.2	0.8	0.2								0.2	0.7	0.6	0.45							0.3	0.9	0.3	1							0.2	0.15	0.8	0.4							1.6	0.75	0.65
0.2	0.1	0.9	0.4	1.45								0.5	0.35	0.1	0.25							0.2	0.9	0.2	0.3							0.1	0.95	0.4	1.1							0.35	0.3	1.2
0.1	0.5	0.2	0.65	0.15								0.1	0.7	0.35	0.3							0.95	0.4	0.55	1.1							0.15	0.35	0.25	0.9							0.15	0.5	1.25
0.2	0.2	0.65	1.35	0.15								0.45	0.65	0.25	0.45							2.9	0.45	0.55	0.1							0.2	0.1	0.15	0.45							0.1	0.6	0.1
0.3	0.15	1.05	0.3	0.1								0.15	0.15	0.2	0.1							0.4	0.3	0.4	0.4							0.15	0.25	0.8	0.25							1.6	0.45	1.1
0.1	0.15	0.45	1.25	1.45								0.95	0.15	1.3	0.15							0.55	0.9	0.7	1							0.6	1.85	0.5	0.5							0.55	0.5	1.25
0.3	0.5	0.25	0.25	0.15								1.4	1.15	1.1	0.1							0.5	0.25	0.6	0.2							1.4	1.95	2.95	0.4							0.6	1.1	0.9
0.35	1.4	0.1	0.15	0.1								0.15	0.8	0.7	0.45							0.85	0.3	2	1							1.85	0.6	0.1	0.75							0.1	0.4	0.1
0.35	1.3	1.9	0.25	0.45								0.3	0.3	0.2	0.2							0.25	0.5	0.1	0.35							0.25	0.25	1.55	0.25							0.1	0.1	1.05
0.15	0.25	0.2	0.2	0.75								0.15	0.45	0.45	0.25							0.25	2	0.85	0.55							0.65	0.35	0.1	0.4							0.15	0.3	1.7
0.2	0.4	0.1	1.35	0.75								0.15	0.15	0.45	1.35							0.35	0.2	0.55	0.95							0.3	0.1	3.85	0.2							0.3	0.2	3.65
0.1	0.2	0.2	0.25	0.35								0.3	0.2	0.1	0.1							0.5	0.2	0.15	0.9							0.75	0.5	1.9	0.8							0.4	0.5	0.65
0.15	0.1	1.4	0.1	0.5								0.5	0.6	0.5	0.3							0.9	0.3	0.1	0.15							1.7	0.35	1.05	0.6							1.5	0.7	1.65
0.15	0.2	0.8	0.55	0.15								0.7	0.45	0.55	0.25							0.25	0.45	0.75	0.65							0.1	0.15	0.15	0.15							0.2	0.7	1.7
0.5	0.5	0.75	0.2	0.1								0.2	0.5	0.15	1.8							0.2	0.55	0.75	0.35							0.15	0.4	0.45	0.65							0.35	1.95	0.4
0.7	0.5	0.35	0.3	0.3								0.1	0.1	0.15	0.15							0.25	0.5	2.5	0.1							0.35	0.4	0.4	0.15							1.1	0.8	0.45
1.15	1.4	1.15	0.3	0.1								0.1	0.75	0.65	0.8							0.1	0.9	0.3	0.1							0.15	1.45	0.45	0.1							0.25	0.2	7.05
0.2	0.2	0.4	0.1	0.1								0.35	0.45	0.9	0.15							0.15	0.2	0.15	0.2							2.8	1	1.5	2							0.1	0.1	0.1
0.1	0.2	0.35	0.25	0.6								0.9	0.45	0.25	0.35							0.25	0.1	0.1	0.45							0.3	1.55	1.2	3.2							0.15	1.85	0.4
0.3	0.25	0.1	0.3	0.1								4.35	0.15	0.15	0.5							0.5	0.1	0.25	0.95							1.65	1.5	0.9	1.05							1.05	0.1	0.4
0.35	0.15	0.15	0.2	0.35								1.05	1.3	0.6	0.3							0.8	0.55	0.1	0.2							0.2	0.9	1.15	0.1							0.25	2.05	0.6
0.15	0.35	0.15	0.1	0.1								0.1	0.2	0.2	0.2							0.15	0.35	0.2	0.35							1.1	0.85	0.65	1.85							0.45	3.8	2.4
0.15	0.15	0.15	0.15	0.2								0.25	0.15	0.25	3							0.25	1	0.1	0.3							1.9	0.2	2.8	1.05							0.2	1.3	0.2
0.2	0.1	0.1	1.85	0.1								0.45	1.4	0.25	1.25							0.1	0.7	0.25	0.3							0.4	0.2	0.75	0.3							0.3	0.9	0.1
0.1	0.35	0.35	0.4	2.35								0.2	0.6	0.2	0.3							0.2	1.1	1.7	0.85							1.2	0.35	0.1	1.6							0.9	4	0.65
1.25	0.25	0.55	0.3	0.15								0.25	0.4	1.25	0.1							0.35	0.4	0.75	1.1							0.85	0.2	0.15	0.75							0.4	1.55	2.45
0.2	0.3	0.3	1.7	0.3								0.95	0.35	0.2	0.45							0.2	0.55	0.3	1.05							0.55	0.45	0.4	1.45							0.35	1.8	0.35
0.1	0.35	0.35	0.4	0.95								1.25	0.6	0.7	0.5							1.55	2.35	0.15	0.55							0.55	0.2	0.25	0.4							1.8	0.25	1.85
0.4	1.1	0.45	0.3	0.55								0.55	0.15	0.25	0.2							0.35	0.15	0.2	0.65							0.2	0.3	3.4	0.9							0.2	0.2	0.4
0.15	0.5	0.35	0.95	0.9								0.6	0.35	0.15	0.2							1.5	0.3	1	0.15							0.5	2.5	0.1	0.2							0.4	0.65	0.25
0.1	0.7	0.25	0.1	0.25								0.55	1.65	0.45	0.1							0.2	0.5	0.1	0.1							0.2	0.95	1.55	0.6							1.5	0.45	0.55
0.1	0.35	0.45	1	0.65								1.1	1	0.1	0.2							4.45	0.5	0.75	0.15							1.8	1.05	0.3	0.15							1.55	1.05	0.15
0.3	0.2	0.5	0.1	0.4								2.35	0.6	0.25	0.7							1.05	0.3	0.1	0.65							0.15	0.3	0.2	2.45							0.7	0.1	1.05
0.35	0.9	0.15	0.7	0.4								0.65	0.25	0.1	0.15							0.55	0.35	0.35	0.2							0.15	0.1	1.5	1.3							0.2	1.3	0.35
0.1	0.55	0.3	1	0.15								0.2	0.7	0.3	0.1							0.55	0.3	1.4	0.25							0.4	0.6	0.45	2.55							6	1.75	0.3
0.35	0.3	0.25	0.35	0.15								0.1	0.5	0.65	0.1							0.1	0.2	0.1	0.2							0.75	0.25	0.4	1.2							0.35	0.2	0.5
0.4	0.6	0.6	0.5	0.3								0.2	0.35	0.65	0.55							0.25	0.85	0.15	1.55							3.65	1.5	1.15	2.45							0.35	0.15	0.55
0.1	0.75	0.1	1	1								0.6	0.7	0.5	0.15							1.1	0.15	0.25	0.1							2.2	0.2	0.8	0.1							2.05	0.25	1.35
0.25	0.1	1.35	0.5	0.3								0.65	1.1	1	0.25							0.35	0.9	0.2	0.3							0.15	0.65	0.35	0.3							0.65	0.85	2.25
0.2	0.6	0.15	0.1	0.15								0.15	0.5	0.2	0.25							0.15	0.45	0.85	1							0.45	0.1	0.25	1.15							3.05	0.2	0.7
2.15	0.3	0.35	0.25	0.2								1.05	0.5	1.95	0.25							1	1.5	2.95	0.6							0.2	0.1	0.25	0.9							0.3	0.55	0.5
0.4	0.35	1.4	0.6	0.3								0.65	1.9	0.35	0.35							0.15	1.15	1.35	0.1							0.65	1.1	0.4	0.2							0.7	0.25	0.75
0.1	0.1	0.15	0.25	0.1								0.5	0.15	0.1	0.2							1.75	0.2	1.15	0.75							0.4	2.35	0.2	0.7							2.7	0.15	1.85
0.5	0.1	0.2	0.1	0.3								0.3	0.4	0.35	0.9							0.45	1.5	0.35	0.95							0.2	0.55	2.1	1.25							0.4	0.8	0.6
0.2	1.05	0.15	0.2	0.85								1.1	0.2	0.75	0.4							0.5	0.45	0.3	0.7							0.65	0.7	0.45	3.2							0.5	0.45	0.3
0.85	0.25	0.1	0.6	0.25								0.1	0.4	0.15	0.5							0.3	0.25	0.15	2.3							0.15	0.1	2.15	0.5							1.25	0.5	0.3
0.75	0.95	0.35	0.4	0.95								0.35	1.85	0.25	1.3							0.1	0.3	0.25	0.3							0.6	0.2	0.3	1.6							0.95	0.75	0.7
0.1	0.5	0.1	1.3	1.15								1.35	0.45	0.65	0.45							0.2	0.6	0.65	0.55							0.3	0.75	0.65	2.7							0.25	0.5	0.6
0.25	0.3	0.1	0.15	0.1								1.45	0.1	0.1	0.1							0.65	0.6	0.7	0.45							0.1	0.15	0.15	0.7							9.3	1.45	3.65
0.2	0.95	0.45	0.1	0.1								2.8	0.3	0.15	0.1							0.15	0.7	2	0.3							0.45	0.4	0.35	1.6							0.95	0.35	2.75
0.4	0.15	1.9	0.3	1.25								0.35	0.7	0.35	1.3							1.15	0.55	0.25	1.9							1.1	1.5	1.5	0.65							2.45	2.15	2.2
0.85	0.8	0.2	0.6	0.9								0.75	0.5	0.15	0.4							0.35	0.2	0.85	0.25							0.15	0.75	0.45	0.3							0.8	0.5	1.3
0.15	0.4	0.1	0.75	1.2								1.2	0.4	0.2	0.15							0.6	0.6	0.25	0.65							1.2	0.45	0.3	1							0.5	0.2
0.35	0.3	0.3	1	0.5								0.2	0.1	0.35	0.45							0.3	0.1	0.45	1.3							0.15	1.65	0.35	1.95							1.75	0.2
0.9	0.15	0.3	0.4	1.55								0.35	0.5	0.2	0.2							0.2	0.8	0.65	2.15							5.35	0.8	2.5	1.75							0.3	1.75
0.3	0.2	0.15	0.9	0.55								1.75	0.1	0.45	0.2							0.2	0.35	0.35	0.1							0.45	0.55	0.2	1.25							0.45	0.25
0.45	1.25	1.05	0.2	0.5								0.15	0.15	1.8	0.25							0.9	2	0.5	0.2							0.95	0.2	0.75	1.45							0.35	0.55
0.2	0.75	0.7	0.55	0.5								1.3	0.3	0.3	0.2							0.65	0.35	0.4	0.1							0.65	0.4	0.75	0.1							1.65	2.35
0.3	0.4	0.5	0.15	0.95								0.15	0.45	0.1	0.6							0.35	0.6	0.2	1.3							0.65	0.15	0.15	0.45							0.1	1.75
1.3	0.3	1.05	0.1	1								0.8	0.25	0.25	0.65							0.5	0.25	1.2	0.6							1.9	0.85	0.95	0.9							0.25	1.05
0.15	0.25	1.9	0.25	0.45								0.1	0.4	1.65	0.6							0.2	1	0.85	0.55							0.7	1.55	0.1	1							2.35	2.55
0.5	0.15	0.55	0.15	0.65								0.4	0.1	0.6	0.6							0.2	0.4	0.7	0.5							0.45	0.45	1.8	1.35							1.4	0.5
0.15	0.25	0.1	0.65	0.65								0.5	0.9	0.5	0.3							0.5	0.45	1.75	0.3							0.7	0.95	0.2	0.9							0.6	0.45
0.1	0.15	0.1	0.45	1.05								1.15	0.4	0.85	0.75							0.65	0.45	0.2	0.6							0.6	0.25	0.25	0.65							0.65	2.15
0.15	0.7	0.35	0.35	1.2								0.2	0.25	0.2	0.55							0.1	1.9	0.25	0.75							0.35	2.2	0.2	0.45							0.6	0.25
0.25	0.15	0.15	0.2	0.1								0.5	0.95	0.1	0.4							0.95	0.2	0.1	0.25							0.15	0.45	0.7	1.55							0.6	0.1
0.1	0.1	1.55	0.2	0.25								0.35	0.6	0.8	0.1							0.15	0.4	0.95	0.6							0.25	0.25	1.25	1.3							3	0.95
0.75	0.45	0.3	1.25	0.15								0.3	1.45	0.1	0.15							0.2	0.15	1.6	0.4							0.3	0.2	0.25	2.4							1	0.6
0.7	0.1	1.4	0.35	0.55								0.3	0.1	1.1	0.1							0.95	1.4	1.05	1.7							1.25	0.5	0.15	0.5							0.3	0.1
0.25	0.1	1.5	0.65	0.45								0.65	0.3	0.1	1.85							0.1	0.15	0.5	0.1							1.65	0.45	0.15	0.4							0.7	0.75
0.2	0.6	0.5	0.45	0.1								0.6	0.25	0.35	0.1							0.15	0.45	0.35	0.4							0.75	0.45	0.7	0.25							0.25	1.15
0.2	0.2	0.25	0.75	0.25								0.1	0.25	0.5	0.25							0.1	0.15	0.35	0.8							0.3	0.2	1.1	1.5								0.1
0.35	0.35	0.15	0.35	0.3								0.6	0.1	0.75	0.1							0.1	0.95	0.15	0.15							0.8	0.1	1.2	0.45								2.45
0.5	0.4	0.3	0.5	0.75								0.9	0.15	0.6	1.25							0.15	0.55	0.2	0.55							0.45	0.45	1.6	0.4								0.1
0.15	0.2	0.4	0.25	0.35								0.3	0.15	0.5	0.1							0.5	0.3	0.3	0.7							0.9	0.4	0.55	0.4								1.05
0.4	0.1	0.1	0.15	1.25								1.15	0.4	0.1	0.25							0.75	0.75	0.3	2.55							4.5	1.05	1.25	0.45								0.8
0.4	0.2	0.95	0.2	0.1								0.75	0.3	0.7	0.6							0.2	0.75	0.25	0.55							0.75	0.35	0.4	1.85								0.1
0.7	1.65	1.75	0.4	1								0.2	0.45	0.5	0.35							0.1	0.15	0.35	1.45							0.1	3.15	0.95	0.15								0.3
0.1	0.2	0.3	0.8	0.25								0.2	0.65	0.75	0.75							1.05	0.15	0.65	1.45							0.75	0.35	0.15	0.15								0.2
0.85	0.55	0.55	0.1	0.1								0.35	0.1	0.4	1.2							0.15	0.75	0.25	1.1							1.05	0.3	0.1	0.1								2.2
0.55	1	0.2	0.4	0.25								0.35	0.3	0.65	0.25							1.35	0.4	0.45	0.15							0.7	0.1	0.1	0.25								0.85
3.05	0.4	0.35	0.4	0.7								0.4	0.25	0.15	0.2							0.45	0.35	0.6	0.5							0.45	0.85	0.4	0.6								1.05
0.15	0.15	0.4	0.25	1.8								0.35	0.4	0.6	0.75							0.3	0.2	0.1	0.25							1.2	0.5	0.7	0.1								1.7
0.5	0.1	0.1	0.9	0.2								0.95	2.7	0.3	1.45							1.05	0.1	1.5	1.1							0.2	1.95	1.1	0.25								0.15
0.75	0.25	0.55	0.15	0.9								1	0.95	0.35	0.3							0.45	0.5	0.55	0.75							0.65	0.6	0.15	1.3								2.15
0.2	0.45	0.25	0.65	0.6								0.25	0.6	0.3	0.25							0.65	0.1	0.65	0.15							0.8	1.2	0.1	0.55								2
1.4	0.35	0.1	0.5	1.55								0.35	0.3	0.25	0.9							2.85	0.2	0.15	0.15							0.3	1.7	0.1	0.15								0.55
0.6	0.5	0.35	0.6	0.85								2.05	0.8	1.75	0.5							0.1	2.55	0.2	0.65							2.05	0.55	0.25	0.9								0.3
0.15	0.2	0.15	0.1	1.4								0.35	0.35	0.85	0.75							0.1	0.4	0.45	0.8							0.15	0.35	0.7	1.25								0.3
0.45	0.85	0.5	1.65	0.1								0.15	0.4	0.9	1.1							0.15	1.1	0.6	0.95							0.95	0.15	0.75	0.45								3.1
0.1	0.8	0.1	2.15	0.35								0.45	0.15	0.45	0.25							0.2	0.1	0.15	0.3							0.2	0.2	1.55	0.35								0.95
0.5	0.4	0.15	0.35	0.25								0.2	0.4	0.2	0.35							5.6	1	2.85	0.2							0.3	4.25	0.1	1.35								0.2
0.25	0.2	0.45	0.75	0.25								0.75	0.25	0.1	0.2							0.3	0.15	0.3	0.7							1.05	6.05	0.4	0.15								0.6
0.1	0.75	1.05	0.65	0.1								0.2	0.85	0.85	0.15							1.1	0.8	0.25	0.35							0.15	0.1	0.35	2.5								0.3
0.8	0.35	0.6	0.5	1.9								0.25	0.15	0.95	0.15							0.1	0.25	0.45	0.8							0.6	0.15	0.3	0.35								0.6
0.1	0.1	0.8	1.4	0.4								0.2	1.7	0.45	0.75							0.6	0.35	0.45	1.4							0.15	0.25	0.15	0.5								1.45
0.1	1.05	1.5	2.45	0.65								0.1	0.25	0.6	0.55							0.9	0.1	0.6	0.75							1.6	0.2	0.1	0.1								0.25
1.05	0.6	0.4	0.25	0.5								0.15	0.15	0.35	0.65							0.8	0.5	0.85	0.6							0.15	0.3	0.3	0.15								0.45
0.45	0.25	0.3	0.6	0.85								0.65	0.25	0.35	0.35							0.35	0.25	1.95	0.25							0.1	0.65	0.5	0.15								2.65
0.35	0.5	0.65	1.1	0.15								0.2	0.4	1.35	0.45							0.5	0.2	0.1	0.45							0.3	0.15	1.4	0.85								1.4
0.2	0.3	0.2	1.1	0.45								0.85	0.2	0.15	0.55							0.45	0.4	0.35	0.15							2.5	0.7	0.95	1.05								0.2
0.35	0.2	1.8	0.6	0.65								0.85	0.55	0.1	1.05							0.65	0.15	0.55	0.1							0.9	0.1	0.35	0.85								3.7
0.2	0.35	1.1	0.35	2.45								0.15	0.15	0.1	0.1							0.3	0.1	0.25	0.1							0.4	0.6	0.15	1.25								1
0.4	0.6	0.65	0.55	1.05								1.2	0.75	0.4	0.8							0.55	0.35	0.35	0.1							1.1	0.2	0.85	0.15								6.5
0.35	0.35	0.25	0.7	0.6								0.2	0.6	0.8	0.15							0.15	0.95	1.5	0.35							1.8	1	1.3	2.95								1.9
0.2	0.65	0.45	0.25	0.1								0.6	0.1	0.8	2.4							0.6	0.9	1	1.1							1.35	0.7	0.45	0.2								0.3
1.25	0.75	0.2	0.85	0.1								0.35	0.6	0.6	0.3							0.75	2.1	0.1	0.55							0.1	0.7	0.3	3.65								1.5
0.2	0.15	0.35	1.1	0.3								0.1	0.1	0.15	0.2							1.05	0.6	0.1	0.75							0.7	3.6	0.15	0.55								2.2
0.65	1.35	0.25	0.1	0.2								1.1	1.85	0.7	0.25							0.1	0.3	0.3	0.15							0.25	0.1	0.95	0.3								0.45
0.25	0.5	1.7	1	0.3								1.05	0.4	0.15	0.1							0.15	0.35	0.1	1.05							0.45	0.1	0.35	0.5								1.5
0.45	0.15	2	0.55	1.55								0.1	0.25	0.1	1.15							0.5	0.3	0.25	0.35							0.55	0.15	0.15	1.45								1.75
0.5	0.2	0.25	0.1	0.75								1.95	0.3	0.1	0.55							0.45	0.25	1	0.1							3.4	2.3	0.15	0.2								0.35
0.1	0.9	0.35	0.55	0.25								0.9	0.3	0.5	0.1							1.05	0.3	0.15	0.7							0.7	0.2	0.3	0.5
0.15	0.15	0.6	0.4	0.2								0.1	0.45	0.45	0.85							0.4	0.45	0.2	0.55							0.3	0.3	0.9	2.4
0.1	0.55	0.55	0.3	0.2								0.15	1.45	1.15	0.2							0.15	1.35	1.45	0.15							0.65	2.7	1.05	0.1
0.4	0.15	0.55	0.65	0.5								0.1	3.4	2.4	0.75							0.5	0.3	0.15	0.5							0.1	0.2	0.65	1.2
0.15	0.3	0.1	0.25	0.2								0.15	0.4	0.85	0.55							0.2	1.2	1.45	0.2							1.45	0.4	1.45	0.35
0.15	0.2	0.5	0.2	0.2								0.3	0.3	0.15	1.3							0.2	1.7	0.2	1.25							0.4	0.85	0.1	1.4
0.4	0.2	0.4	0.5	0.7								0.1	0.45	0.5	0.1							0.85	0.45	0.6	0.95							0.1	0.65	3.1	0.55
0.15	1.15	0.45	1.05	0.95								1.25	0.65	0.1	1.15							0.65	1.2	0.25	0.4							1.4	1.7	0.15	0.15
0.2	0.3	0.25	0.1	0.5								0.8	0.6	1.05	0.2							1.15	1.15	1.5	2.8							1.25	0.1	1.45	0.5
0.4	1.3	0.4	0.8	0.15								0.9	0.45	0.1	0.15							0.2	2.9	0.1	0.7							0.25	2.35	1.65	0.55
0.55	0.25	0.15	0.65	0.25								0.1	0.2	0.1	0.1							1.15	1.7	1.35	0.2							2.45	0.15	2.3	1.85
0.1	0.1	0.3	1	0.15								0.65	0.75	1.35	0.65							0.6	0.1	0.25	0.2							0.15	2.9	0.15	0.45
0.8	0.15	0.9	0.1	0.1								0.4	0.15	0.3	0.4							1.85	0.15	0.15	0.1							2.15	1.1	0.35	0.5
1	0.25	0.1	0.35	0.35								1.8	0.85	0.1	0.1							0.15	0.95	0.15	0.1							0.5	0.25	0.6	1.35
0.4	0.1	0.4	0.15	0.35								0.2	2.2	0.4	0.35							0.15	0.2	0.75	0.3							0.55	1.2	0.45	0.65
0.45	0.55	1.6	0.15	0.4								2.85	0.35	0.2	0.5							1.8	0.2	0.4	0.25							1.4	0.1	1.65	0.35
0.1	0.25	0.25	0.1	1.05								0.1	1.65	0.25	0.8							0.15	0.35	0.15	0.5							0.2	0.3	1.5	0.4
0.1	0.15	1.4	0.1	0.45								1.15	0.4	0.7	0.25							0.25	0.5	0.45	0.15							0.5	0.2	0.8	0.35
0.1	0.75	0.25	0.45	0.2								0.25	0.25	1.45	0.5							0.1	0.65	0.1	1.2							0.75	0.25	0.1	0.35
0.4	0.1	0.15	0.6	0.6								0.3	0.4	1.35	0.2							0.1	0.25	0.35	0.2							1	0.7	0.45	0.25
0.1	0.15	0.45	0.55	0.2								1.1	0.3	1.1	0.5							0.1	0.55	0.1	0.4							0.75	0.55	2.2	0.85
0.5	0.25	0.1	1.9	0.15								0.15	1.45	1.5	0.4							1.75	0.5	0.2	0.5							2.5	0.15	0.85	0.75
0.25	0.15	0.25	0.3	0.2								0.35	0.95	0.25	0.2							0.3	0.1	0.65	0.2							0.8	0.25	0.2	7.5
0.25	0.2	0.25	0.3	0.7								0.2	0.4	0.45	0.3							1.15	0.35	0.7	0.75							0.65	0.3	2.45	0.25
0.3	0.25	0.15	1.05	0.3								0.5	0.2	0.2	0.8							0.15	1.6	0.9	0.1							0.9	1.35	0.7	1
0.2	0.55	0.25	0.25	0.2								0.5	0.6	0.3	0.9							0.6	0.2	0.45	0.25							0.1	0.15	0.45	1.05
0.4	0.15	0.5	1.3	0.2								0.15	0.2	0.45	0.2							0.65	0.4	0.3	0.15							3.7	0.9	0.4	0.2
0.45	0.1	1.1	0.2	0.45								0.2	0.1	0.15	0.25							0.35	0.7	1.2	0.6							0.7	1.55	0.4	0.45
0.1	0.15	0.25	0.45	0.1								0.15	0.2	0.35	0.1							1.3	0.2	1.15	0.15							0.1	0.25	0.55	0.1
0.55	0.6	0.6	0.7	0.45								0.1	0.1	1.1	1.2							1.05	0.6	0.7	1.1							0.5	2.1	0.2	0.5
0.45	0.1	0.25	0.45	0.8								0.75	0.45	0.8	0.5							0.9	2.8	0.85	1							0.55	0.2	1.4	0.4
0.2	0.45	0.2	0.15	0.2								0.55	0.45	0.3	0.2							0.2	0.4	0.4	0.95							0.45	0.2	2.2	0.5
0.2	0.55	0.7	1.15	0.1								0.15	0.15	0.1	0.85							1.1	1.25	0.45	0.75							0.2	0.4	1	0.2
0.4	0.45	0.85	0.2	0.2								1.3	0.45	0.7	0.65							0.1	0.2	0.3	2.55							0.95	0.15	1.6	0.2
0.95	0.15	0.45	0.25	0.85								1	0.4	0.85	0.1							1	0.35	0.9	0.35							1.8	0.65	2.85	0.2
0.7	0.1	0.15	1.95	0.25								0.35	0.2	0.6	0.15							1.7	0.1	0.4	0.2							0.25	0.1	0.25	0.1
0.1	0.45	0.65	0.15	0.2								0.4	0.1	0.15	0.2							0.1	0.65	0.1	0.25							1.35	1.55	0.1	1.05
1.1	0.15	0.9	0.7	0.2								0.15	0.4	0.4	0.25							0.2	0.25	1	1.3							0.25	1.05	1	0.8
0.55	0.15	0.45	0.6	0.2								0.2	0.25	1.3	1.1							0.2	1.9	0.15	0.3							0.35	0.25	0.4	0.75
0.55	0.65	0.15	0.15	0.1								0.15	0.1	0.15	0.75							1.15	1.15	1.1	0.45							0.3	0.45	1.95	0.85
0.7	0.1	0.25	1.9	0.85								0.1	0.1	0.65	0.4							1.15	0.1	0.15	1.45							0.95	0.95	0.45	0.7
0.45	0.35	0.35	0.25	0.1								0.4	1.05	0.65	0.5							1	0.2	1.05	0.9							0.7	0.15	0.7	0.45
0.3	0.1	0.7	0.3	0.1								0.45	0.35	0.1	1.55							0.3	2.05	0.2	3.45							3.05	0.1	0.2	0.2
0.4	0.5	0.65	0.2	1.7								0.3	2	0.1	0.4							0.4	1.45	0.45	0.75							0.1	0.25	1.9	1.1
1.35	0.1	0.5	3.3	0.4								0.55	0.1	0.3	0.2							0.15	0.7	0.2	0.2							1.9	0.3	0.8	1.3
0.2	0.25	0.15	0.1	0.4								0.15	0.1	1.7	1.25							1.1	0.8	3.45	0.2							0.1	0.35	1.4	3.2
0.85	0.6	1.35	1.15	0.2								0.25	0.25	0.1	0.2							2.5	0.15	0.15	0.35							1.7	0.2	0.6	0.4
0.4	0.3	0.15	1.1	0.15								1.7	0.55	0.25	0.4							1.3	2.1	0.55	0.3							1.4	0.1	1.5	0.45
0.55	0.8	2.35	0.3	0.25								0.25	0.1	0.45	0.4							0.2	0.15	0.15	0.6							1.2	0.15	0.4	0.4
0.1	0.85	0.75	1.05	0.75								0.1	0.45	1	0.55							0.8	0.1	0.4	0.65							0.15	0.8	0.15	0.4
1.4	0.35	0.5	0.95	0.7								0.65	0.15	1.1	0.75							0.55	0.2	0.1	0.3							0.85	0.25	2.15	2.5
0.65	0.6	0.1	1.75	1.15								0.6	0.1	0.55	0.6							0.35	0.3	0.25	0.3							0.4	1.15	0.4	0.1
0.2	0.1	0.15	1.15	0.25								2.3	1.35	0.2	2.3							2.7	0.95	0.4	0.6							1.75	0.7	0.8	1.75
0.85	0.15	0.7	0.6	0.15								0.25	0.45	0.4	1.2							1.05	0.45	2	0.4							0.35	0.6	0.6	1.35
0.25	0.5	0.8	0.1	0.1								1.2	0.7	1.7	0.35							0.1	0.35	0.15	0.4							0.35	0.4	0.3	0.45
0.3	0.9	0.55	0.1	0.25								0.15	0.15	0.25	0.9							0.15	0.25	0.15	1.25							0.25	0.1	0.1	1.7
1.2	0.7	0.2	0.55	0.5								0.2	0.15	1.4	0.25							0.4	0.45	0.1	0.1							0.45	0.25	0.6	4.35
0.5	0.25	0.25	0.5	0.15								0.25	0.15	0.2	0.6							0.55	0.3	0.65	0.6							2.2	0.1	0.25	0.15
0.2	2.25	1.1	0.45	0.15								0.65	0.5	0.5	0.4							0.1	1.4	1.05	0.6							2.4	0.35	0.4	0.75
0.2	0.8	1.2	0.3	1.05								1.95	0.1	0.45	0.1							0.35	0.1	0.85	0.1							0.75	0.5	1.55	1.5
0.5	4.35	0.55	0.4	0.7								1.65	0.6	0.1	0.25							0.35	0.8	0.5	1.25							2.6	2.05	3.35	2.7
0.85	0.35	0.25	0.55	0.35								0.1	0.45	0.25	1.25							0.6	0.7	0.15	0.1							1.85	0.75	0.85	0.4
1	0.9	0.2	0.15	1								0.1	0.15	0.2	1.85							1.85	0.3	0.2	0.45							1.05	1	0.65	0.45
0.4	0.3	0.1	0.45	1								3.65	0.35	0.8	0.1							0.45	0.1	0.1	0.2							0.5	0.15	1.95	0.95
0.1	1.05	0.5	0.3	0.5								0.65	0.5	0.25	0.5							0.3	1.35	2.55	0.3							0.75	0.4	0.1	1.15
0.25	0.2	0.2	0.65	0.65								0.2	0.1	0.6	0.8							0.15	0.95	0.3	0.75							0.5	1.6	1.55	0.1
0.15	0.15	1.05	0.1	0.9								0.4	0.45	0.2	0.75							1.15	0.2	0.35	0.65							0.7	0.15	0.35	0.95
0.15	0.35	0.2	0.15	0.7								0.3	0.6	0.75	0.75							0.35	1.7	0.1	0.35							0.35	0.2	0.7	0.4
0.65	0.95	0.2	0.6	0.1								0.15	0.5	0.25	0.7							0.15	0.25	0.2	0.5							0.3	0.15	1.25	2.4
0.4	0.35	0.6	0.5	0.6								0.3	0.15	0.3	0.7							1	0.1	0.7	0.15							1.25	0.45	0.15	0.8
0.3	0.1	0.2	0.55	0.5								0.5	0.3	0.35	0.65							0.15	1.4	0.55	0.15							0.85	1.6	0.9	0.3
0.3	0.35	0.1	0.35	0.75								0.55	0.1	0.6	0.2							0.75	0.15	0.6	0.55							0.6	0.1	2.7	0.15
0.25	0.35	0.1	0.4	0.45								0.4	0.15	0.9	0.1							0.7	1.5	1.75	0.15							4.7	1.4	1.75	2.1
0.15	0.2	0.3	0.7	0.1								0.2	0.75	0.45	1.35							0.2	0.1	0.2	0.65							0.4	0.95	0.25	0.1
1.25	0.25	0.2	0.3	0.2								0.15	0.95	0.3	0.3							2.25	0.2	0.3	0.8							0.15	0.1	0.55	0.35
0.3	0.2	0.3	0.5	0.95								0.6	0.15	0.3	0.3							0.7	0.7	2.1	0.3							0.65	1.15	1.1	0.15
0.6	0.7	0.15	0.25	0.5								1.7	0.15	0.15	0.95							0.2	1.35	0.1	0.5							0.65	1.5	1.8	0.45
0.7	0.7	0.4	0.25	0.1								0.3	0.15	0.9	0.45							0.85	0.4	0.25	0.55							0.1	0.15	1.3	1.6
0.2	0.9	0.7	0.9	0.65								0.45	1.1	0.45	0.85							0.55	0.3	0.4	0.8							1.5	0.4	1.8	0.45
1	0.75	0.5	0.35	0.65								1.7	0.15	0.2	0.3							0.35	0.4	1.7	0.15							0.5	0.15	0.2	0.1
0.85	0.3	0.25	0.1	0.55								0.25	0.45	0.4	0.2							0.55	0.5	0.35	0.3							0.45	1.55	0.4	0.85
0.3	0.15	0.25	0.4	0.15								0.35	0.2	1	0.35							0.8	0.3	0.55	1							2.25	0.4	0.45	0.55
0.6	0.3	0.8	0.1	0.2								0.25	0.3	0.2	0.85							0.55	0.7	0.2	0.3							1.25	0.25	0.25	0.1
0.55	0.1	0.45	1.7	0.35								0.3	0.45	0.2	0.1							0.2	1.05	0.8	0.2							0.9	1.35	0.3	1.95
0.8	0.5	0.65	0.2	0.55								0.85	0.3	0.6	0.15							1.05	0.35	0.15	0.85							0.15	0.65	0.1	0.45
0.4	1.35	1.05	0.55	0.25								0.35	0.95	0.2	1.55							0.45	0.55	0.5	0.25							0.1	0.55	0.45	2.5
0.25	0.5	0.15	3	0.45								3.1	0.25	0.5	0.75							0.45	0.1	0.65	0.25							0.55	0.1	0.4	0.95
0.15	1.7	0.65	0.1	0.1								0.35	0.3	1.3	0.3							0.6	1.45	0.3	0.9							0.45	0.6	3.9	0.55
0.3	2.25	0.3	0.25	0.1								0.8	0.25	0.65	2.85							0.65	0.25	0.8	0.85							0.3	0.2	4.4	0.5
0.6	0.4	0.85	2.1	0.3								1.05	1	0.25	0.2							1.2	0.5	0.4	0.25							0.15	0.25	1.55	0.25
0.65	0.35	0.55	0.1	0.65								0.25	0.25	0.2	0.25							0.15	0.8	1	0.7							0.2	0.95	2.9	0.3
0.35	0.85	1.5	0.35	0.3								0.65	0.5	0.45	0.1							0.9	0.1	1.7	1.05							0.4	0.95	0.7	0.1
0.3	0.3	0.25	0.35	0.4								0.45	0.4	1	0.5							0.25	0.75	0.1	0.6							1.6	0.3	0.75	0.15
0.5	0.7	0.1	0.4	0.45								1	0.15	0.35	0.35							0.1	0.65	0.4	0.6							0.4	0.35	0.4	0.65
0.2	0.45	0.1	1	1								0.25	0.35	0.7	0.55							0.9	0.75	0.3	2.1							0.45	0.15	2.3	0.2
0.7	0.2	0.4	0.35	0.25								0.15	0.1	0.2	1.25							0.35	0.15	1.05	0.75							0.35	0.1	0.15	2.7
0.85	0.15	0.2	0.1	0.35								0.2	0.1	0.7	0.1							4.05	0.15	0.45	0.65							0.35	0.25	0.2	0.95
0.45	0.25	0.15	0.55	0.3								1.05	0.1	0.25	0.2							0.15	0.25	2.1	0.6							0.15	1	0.25	3.45
0.3	0.2	0.3	0.1	0.8								0.25	0.1	0.2	0.1							1.5	0.5	0.9	0.5							0.8	0.95	0.4	0.1
0.6	0.1	0.35	0.15	0.35								1.4	0.15	5.35	0.45							0.45	0.25	1.2	2.7							0.4	0.3	0.65	0.65
0.45	0.35	0.55	0.2	0.1								0.25	0.25	0.65	0.35							0.75	0.1	1.3	0.35							1.75	0.15	2.3	0.3
0.3	1.4	0.4	1.05	0.8								0.4	0.65	0.5	0.4							1.05	0.2	0.1	2							0.1	0.35	0.35	3
1.55	1.05	0.1	0.45	0.3								0.1	0.4	0.3	0.7							0.35	0.4	0.35	0.25							0.6	0.35	0.2	0.15
0.4	0.35	0.45	0.55	0.55								0.1	0.2	1	0.3							0.25	1.15	0.45	1.4							1.05	0.3	2.15	0.25
1.55	0.45	0.2	0.8	1								0.45	0.1	0.2	0.15							0.95	0.4	0.2	0.25							3.1	0.35	0.65	1.5
0.5	0.15	0.3	0.45	0.4								0.1	1	0.45	1.2							0.55	0.55	1.75	0.45							0.1	0.15	1.85	0.1
0.55	0.2	1.55	0.1	0.15								0.95	0.25	0.6	0.1							0.35	0.2	0.15	0.3							0.15	0.1	0.15	1.45
0.1	0.2	0.15	1.1	0.7								0.2	0.5	2.05	0.2							0.65	0.1	0.1	0.3							0.55	0.45	0.3	0.1
0.25	0.25	0.1	0.15	0.3								0.1	1.35	0.4	0.1							0.35	0.3	0.35	0.5							0.45	0.25	1.05	0.3
0.65	0.75	0.7	1.15	0.35								0.25	0.3	0.55	0.35							0.7	0.85	1.25	0.25							1.7	0.15	0.45	0.1
0.2	0.35	0.5	0.35	0.95								0.35	0.95	0.25	0.2							0.5	2.1	0.25	0.3							2	0.85	1.3	0.15
0.1	0.85	0.35	0.1	0.15								0.2	0.75	0.2	0.15							1.55	0.6	0.3	0.4							0.3	0.4	0.2	0.5
0.85	0.5	0.2	0.2	0.4								0.25	0.55	0.25	0.45							0.25	0.45	0.15	1							0.2	2.3	0.1	0.85
0.15	0.5	0.7	0.1	1.6								0.25	0.35	0.3	0.35							0.7	0.5	0.25	0.45							0.85	0.4	0.65	1.45
0.2	0.7	1.75	0.35	0.2								0.45	0.2	0.2	0.25							0.4	0.75	0.6	0.3							0.3	0.4	0.65	1.95
0.65	0.5	0.1	0.1	0.45								1	0.4	0.8	0.2							1.15	1.2	0.1	0.1							0.4	0.85	0.55	13.5
0.25	0.45	0.4	0.95	0.45								0.2	0.3	0.15	1.15							0.8	0.3	2.15	0.15							1.3	6.15	0.15	0.15
0.3	0.3	0.65	0.45	0.1								0.35	0.4	0.8	0.95							0.25	0.6	0.85	0.25							0.95	0.1	0.15	0.1
0.45	0.35	0.1	0.15	0.65								0.9	1.55	0.15	0.6							0.35	0.25	1.9	1.4							0.5	0.35	1.85	2.7
0.3	0.75	0.1	0.4	0.1								0.2	0.1	0.25	0.75							0.1	0.65	0.75	0.3							0.3	0.6	1.8	0.85
0.25	0.75	0.9	0.55	0.15								0.25	0.45	0.2	0.45							0.6	0.75	0.15	0.55							0.3	0.75	0.4	1.35
0.2	0.25	1.55	0.2	0.2								0.4	0.55	0.3	0.1							0.1	0.35	0.65	0.65							0.75	1.25	1	1.8
0.3	0.5	0.45	0.1	0.4								1	0.25	0.25	0.1							1	5.4	0.55	1.45							0.45	0.8	0.15	0.1
0.3	1.15	0.1	0.1	0.1								0.2	0.15	0.85	0.8							0.2	0.85	4.2	2.6							1.6	0.75	0.75	0.4
0.2	0.15	1	0.25	1.1								0.75	0.75	0.15	0.1							0.25	1.65	0.6	1.1							1.8	0.95	0.45	0.1
0.3	1.75	0.55	0.5	0.25								0.7	0.25	0.65	0.25							0.9	0.1	0.5	0.15							0.45	0.5	0.1	1.7
0.1	0.45	0.4	0.15	0.4								1	0.2	0.1	0.25							0.6	0.75	0.15	0.4							0.35	0.55	2	0.65
3.3	0.1	0.1	0.1	0.15								0.65	0.1	0.2	0.25							0.75	0.35	0.3	1.6							0.2	0.35	4.45	0.15
0.55	0.35	0.15	0.2	0.4								0.35	0.6	0.35	0.25							0.25	0.75	0.85	0.35							0.3	0.8	0.2	2.7
0.25	0.15	0.5	0.25	0.2								0.1	0.1	0.5	0.3							0.35	0.2	0.45	0.7							0.2	0.15	0.25	0.25
0.2	0.45	0.2	0.45	0.55								0.55	0.15	0.6	0.3							0.15	0.9	0.1	0.5							1.35	1.05	0.35	0.4
0.55	0.65	0.95	0.15	0.2								0.1	0.25	0.2	1.1							0.8	0.6	0.15	0.55							1.65	1.35	0.8	0.95
2.6	0.15	0.1	0.25	0.1								0.9	0.4	0.2	0.55							2.35	0.2	0.45	0.3							0.1	0.2	0.15	2.9
0.45	0.1	0.45	0.25	0.35								2.8	0.1	0.8	1.2							0.15	0.2	0.25	1.3							0.1	1.6	2.25	1
0.65	0.1	0.3	0.15	0.2								0.5	1.55	0.15	0.4							0.2	0.3	0.25	0.25							0.55	0.85	0.2	0.3
0.55	0.5	0.15	0.45	0.3								0.2	0.1	0.9	0.6							1.05	0.2	0.1	0.8							0.25	2.1	1.6	1.95
0.1	0.7	2.5	0.15	0.75								0.1	0.1	0.2	0.45							0.35	0.9	0.1	0.7							0.25	0.2	1	0.1
0.55	0.35	0.35	0.1	0.1								0.3	1.35	0.4	0.9							1.25	0.7	0.5	0.5							1.1	0.75	0.35	0.65
1.25	0.1	0.8	1	0.35								0.4	1.3	0.15	0.15							0.2	0.7	3.1	0.75							0.65	1.9	0.1	0.8
1.9	0.2	0.1	0.15	0.1								0.7	0.2	0.2	0.15							0.95	0.75	0.25	0.35							0.15	0.35	1.2	0.5
0.15	2.3	2.55	1.15	0.6								0.1	0.25	0.3	0.1							0.25	0.3	3.05	0.2							0.95	0.15	0.8	3.55
0.25	0.15	1.5	0.7	0.35								0.35	0.4	1.95	0.75							0.75	3.3	0.15	0.35							1.5	0.75	0.15	1.65
0.55	0.75	0.25	0.45	0.7								0.65	0.5	0.25	0.6							0.95	0.35	0.2	0.15							0.4	0.5	0.1	0.35
1.6	1.1	0.15	0.1	1.05								0.9	0.75	0.45	0.2							0.3	0.9	0.8	0.7							1.3	1.45	0.2	0.5
0.2	0.4	0.8	0.5	0.85								0.6	0.1	0.5	0.35							1.25	1.35	0.2	0.2							0.3	1.3	1.2	3.2
1.05	0.6	1.3	0.1	0.25								0.2	0.2	0.15	0.4							0.4	0.9	0.35	0.1							0.1	0.15	0.4	0.5
0.15	0.45	0.85	1.5	0.7								0.5	0.4	0.1	0.1							0.1	0.5	0.35	0.1							0.35	0.25	0.45	0.9
0.4	0.1	0.5	0.45	0.15								0.4	0.1	0.5	0.6							0.3	0.3	0.3	0.4							0.15	0.65	1.65	0.45
0.1	1.05	1.05	0.1	0.55								0.2	0.55	0.6	0.8							0.45	0.1	0.35	1.75							0.75	0.1	0.95	0.45
0.2	0.4	0.45	0.1	0.6								0.35	0.25	2.55	0.2							0.35	1	0.35	0.25							0.95	4.25	0.25	0.45
0.15	0.4	0.5	0.1	0.9								0.65	0.7	0.4	0.25							0.1	0.15	2.65	0.1							0.5	0.15	2.25	0.35
0.4	0.1	0.35	0.95	0.3								0.25	1.3	0.9	0.15							0.55	0.3	3.05	1.4							2.75	0.3	0.65	1.6
0.95	1.4	0.9	0.15	0.35								0.15	0.1	0.15	1.3							0.1	0.65	0.7	0.4							2.85	1.45	0.1	1.1
0.5	0.15	0.45	0.45	0.1								0.1	0.75	0.5	0.5							0.35	0.3	0.5	0.65							2.8	0.25	0.75	0.45
0.1	0.4	2.15	0.15	2.05								0.2	0.1	0.15	0.4							0.4	0.15	0.15	2.15							1.4	0.25	0.15	0.65
0.1	0.85	0.2	0.2	0.45								1.1	1.3	0.15	0.75							0.1	0.1	0.6	0.15							1.8	0.35	1.75	1.25
0.1	0.2	0.5	1.1	0.4								0.15	0.1	0.65	0.4							0.9	0.35	0.45	0.3							0.15	1.2	1.35	0.1
0.3	0.1	0.1	0.2	0.1								0.1	0.2	0.35	0.15							0.1	0.7	0.15	0.2							0.2	1.8	0.1	0.8
0.75	0.45	0.9	1	0.2								0.25	1.25	0.3	0.4							0.7	0.1	2.3	0.2							0.3	0.2	1.55	0.5
0.3	0.15	0.45	0.9	0.45								0.3	0.9	2.25	0.3							0.5	0.25	0.15	0.5							0.15	0.5	1.3	0.25
0.1	1.2	0.25	0.7	0.2								0.25	0.4	0.8	0.2							0.15	0.65	0.2	0.6							0.3	0.3	0.35	0.85
0.1	0.1	0.15	0.1	3.05								0.45	0.25	0.2	1.05							0.75	0.6	0.35	0.65							0.45	3.25	1.35	0.15
0.95	0.3	0.1	0.15	0.1								0.3	0.15	2.15	0.15							0.55	0.1	0.25	0.25							0.1	1	0.4	1.85
1.8	0.1	1.15	0.7	0.45								0.15	0.15	0.1	0.25							0.1	0.1	0.35	0.8							0.7	0.1	0.6	3.9
0.15	0.3	0.65	0.1	0.25								0.65	0.55	1.9	0.25							0.6	1.7	0.1	0.3							2.5	1.3	0.55	0.95
0.1	0.6	0.65	0.15	0.35								0.1	0.2	0.7	0.1							1.15	0.35	0.85	0.55							0.95	0.95	0.75	2.85
0.15	0.65	0.25	0.3	0.4								1.05	0.1	0.25	2.05							0.5	0.75	1	2.05							0.1	0.65	1.15	0.25
0.5	0.6	0.7	0.25	0.45								1.2	1.2	0.1	0.25							0.65	0.55	0.6	1.05							0.25	0.15	0.7	1.2
0.7	0.6	0.7	0.3	0.2								0.1	0.3	0.2	0.15							0.8	0.15	0.3	1							1.1	0.35	1	3.2
0.65	0.2	0.1	0.3	0.15								0.65	0.7	0.15	0.65							0.1	0.5	0.25	0.4							0.25	0.75	0.85	1
0.5	0.15	0.1	0.25	0.25								4	0.2	1.15	0.45							0.35	0.25	0.7	0.2							1.35	0.1	0.75	0.45
0.15	0.9	0.2	0.25	0.6								1.55	0.1	0.5	0.25							0.1	0.15	0.1	1							0.8	0.25	0.4	0.15
0.1	0.9	0.4	1.4	0.35								1	0.15	0.15	0.1							1.6	0.25	0.25	0.1							0.85	1.9	1.45	0.6
0.55	0.1	0.2	0.15	0.3								0.75	0.25	0.1	0.6							0.1	1.8	0.2	0.7							0.45	0.8	0.5	1.35
0.1	0.1	0.1	0.15	0.9								0.3	1.85	1.05	0.3							0.55	0.8	0.85	1.5							0.95	0.3	0.25	0.2
0.1	0.1	0.4	0.6	0.4								0.25	1.65	0.1	0.25							0.2	0.5	0.45	0.35							3.05	0.35	0.8	1.25
0.8	0.1	0.3	0.15	0.6								0.3	0.25	0.2	0.1							0.6	0.9	0.25	0.15							1.45	1.45	0.2	0.75
0.5	0.25	0.35	0.15	0.45								0.25	1.6	0.25	0.5							0.2	0.15	0.3	0.15							1.2	0.6	2.4	0.45
0.5	0.15	0.45	0.1	0.3								0.1	0.4	0.3	0.5							0.2	1.2	0.15	1.7							0.15	0.25	0.45	1.15
0.65	0.4	0.8	0.3	0.2								0.7	1	0.2	0.55							0.1	0.25	0.15	0.6							0.35	0.2	0.1	3
0.15	0.5	1.2	0.15	0.7								0.25	0.35	0.25	0.35							1.55	0.25	0.35	0.15							1.35	0.2	0.85	1.2
0.25	1.8	0.1	0.65	0.3								0.6	0.1	0.4	1.9							0.6	0.35	1	0.3							0.25	0.5	0.5	0.55
1.8	0.75	0.1	0.75	0.75								0.85	0.3	1	0.1							0.1	0.3	0.6	0.55							0.15	3.3	0.7
0.55	0.45	0.8	0.35	0.8								0.25	0.8	0.15	0.6							0.3	0.15	0.3	0.45							1.2	0.2	0.95
0.35	0.45	0.55	0.5	1.35								0.1	0.1	0.1	0.6							0.5	0.4	0.4	0.5							0.65	0.75	1.4
0.55	0.3	4.2	0.15	0.2								0.75	0.4	1.6	0.25							0.25	0.3	0.45	0.25							0.2	0.65	0.15
0.35	0.65	0.35	3.3	0.1								0.3	0.2	0.15	0.9							0.3	0.6	0.1	0.1							0.7	2.25	0.35
1.6	0.1	0.55	0.25	0.25								0.2	0.45	0.1	0.35							0.1	0.1	0.15	0.35							0.1	3.45	2.45
0.35	0.8	0.3	0.65	0.35								0.55	0.7	0.45	0.15							0.35	0.35	0.1	1.8							1.15	0.9	1.05
0.3	0.2	0.1	0.15	1.55								0.75	0.5	0.35	0.2							0.2	0.25	0.1	0.4							0.25	0.1	0.2
1.4	0.65	0.25	0.6	0.1								0.3	0.1	0.2	2.25							0.65	0.5	0.8	0.3							3		0.45
0.1	0.55	0.1	0.25	1.05								0.1	0.3	0.4	0.65							0.15	0.1	0.95	0.2							1.5		0.45
0.4	3	0.2	0.15	0.25								0.25	0.9	0.25	0.85							0.1	0.1	0.1	0.25							0.7		0.1
2.3	0.45	0.4	0.2	0.15								0.3	0.1	0.55	0.1							0.1	0.6	0.3	0.4							0.45		0.9
0.85	0.65	0.2	0.15	0.45								0.1	1	1.05	0.75							2.4	0.9	0.5	2.25							1.15		1
0.7	0.75	0.45	1.55	0.35								0.3	0.25	0.55	0.45							1.85	0.45	0.25	0.1							1.2		0.25
0.3	0.35	0.1	0.45	0.9								0.15	0.55	0.1	0.6							1.3	0.5	1.7	0.45							0.55		2.45
0.1	0.2	0.1	0.35	0.15								0.35	0.2	0.1	0.5							0.1	0.85	0.25	0.5							0.45		1.7
0.3	0.4	0.45	0.25	0.2								0.2	0.25	0.15	0.4							1.45	0.3	0.45	1.05							1.05		0.5
0.9	0.2	0.7	0.7	0.8								1.4	0.25	0.15	0.3							0.85	0.2	0.1	0.15							0.15		0.85
0.35	0.45	0.9	1.25	0.75								0.15	0.1	0.75	0.9							0.7	0.1	0.85	0.1							2.05		0.15
0.55	0.95	1.25	1.75	0.25								0.15	0.4	0.5	0.5							0.15	0.1	0.65	0.1							0.1		1.9
0.4	0.25	1.35	0.1	0.35								0.4	1	0.45	0.1							0.65	0.25	0.2	1.35							1.05		0.35
0.55	0.2	0.15	0.1	0.45								1.1	0.35	0.95	0.1							0.45	0.2	1.1	0.2							0.4		1.6
0.25	1.6	0.5	1.75	0.6								0.45	0.35	0.15	0.35							0.55	0.1	0.1	0.9							0.5		1.05
0.1	0.15	0.15	1.55	0.1								0.2	0.2	0.25	0.15							0.7	0.75	0.1	2.2							1.4		0.85
0.15	0.2	0.6	0.35	0.2								0.15	0.15	1	0.25							0.15	0.2	0.55	1.2							0.1		0.25
0.5	0.1	0.1	0.1	0.2								1.35	0.35	0.15	0.3							0.3	0.2	0.75	0.25							0.2		0.95
0.3	0.55	0.3	0.1	0.55								0.3	0.15	1.4	0.3							0.9	0.5	0.15	0.5							0.1		0.55
0.45	0.9	0.55	0.3	0.15								0.75	0.35	0.55	0.2							0.8	1.2	0.5	0.15							0.15		0.4
0.8	0.2	0.3	0.15	0.4								0.5	0.3	0.2	0.3							0.6	0.2	0.15	0.5							0.85		0.45
0.5	0.2	0.65	0.75	0.45								0.6	0.65	0.15	0.65							0.1	0.15	0.85	0.3							1.45		2.1
0.9	0.3	0.6	0.45	0.4								0.15	0.25	1.3	0.1							0.45	0.1	0.25	0.15							0.35		3.15
0.3	0.75	0.95	0.1	0.55								1.4	0.1	0.75	0.4							0.2	2.15	0.3	0.1							2.6		0.45
0.2	0.7	0.35	0.15	0.1								1.15	1.1	0.4	0.5							0.25	0.65	0.1	0.55							0.6		0.95
0.85	0.35	0.25	0.1	0.2								0.6	0.1	0.1	1.45							0.6	1	0.4	0.15							0.15		0.2
0.25	0.45	0.75	0.2	0.1								0.45	0.35	0.45	0.2							0.25	1.25	0.45	0.25							0.65		0.45
0.35	0.2	0.1	0.85	0.45								0.2	0.15	1.6	1.45							0.9	0.15	2.95	0.2							0.45		0.1
0.35	0.9	0.25	1.1	0.6								0.7	0.1	1	0.15							0.15	0.35	0.85	0.7							3.7		0.3
0.65	0.25	0.45	0.5	0.25								0.2	0.65	0.25	0.15							0.1	0.15	0.2	0.2							5.6		1.15
0.4	0.15	0.2	0.25	0.4								0.25	0.25	0.1	0.2							0.75	0.4	0.4	0.15							0.15		1.75
0.3	0.15	0.1	0.1	0.15								0.4	0.1	0.35	0.4							0.85	0.15	0.2	0.15							0.3		0.45
0.15	0.1	0.65	0.35	0.2								0.35	0.15	0.4	0.75							1.75	0.75	0.6	0.6							0.85		0.5
0.6	0.75	0.25	0.45	1.35								0.2	2.9	0.25	0.75							0.95	0.4	0.25	0.35							0.1		2.45
0.15	0.15	0.15	0.4	0.45								0.5	2.7	1.15	0.3							0.2	0.15	0.7	1.7							0.95		0.1
1.3	0.4	0.4	0.7	0.1								0.2	0.3	0.9	0.4							0.4	0.15	0.1	0.8							0.6		0.45
1.3	1.45	0.4	0.1	0.25								0.4	0.6	0.85	0.15							0.85	0.1	0.4	0.35							0.1		1.2
0.25	2.05	0.25	0.25	0.95								1.25	0.9	0.45	0.6							0.75	0.15	0.2	0.4							0.45		0.6
1	0.1	0.2	0.4	0.75								0.1	0.2	0.35	0.3							0.3	0.75	0.1	0.1							0.1		0.4
0.6	0.65	0.1	0.4	0.7								1.2	1.2	0.35	0.45							0.45	0.25	0.9	0.45							0.1		2.15
0.8	0.25	0.3	1.1	0.4								0.1	0.15	0.2	0.5							0.2	0.1	1.6	0.15							0.65		0.75
2.1	0.2	0.15	0.35	0.15								0.2	0.7	0.65	0.3							0.45	0.5	0.15	0.7							0.15		0.3
0.3	0.1	0.1	0.3	0.5								0.5	0.15	0.15	0.15							1.1	0.8	0.25	0.45							0.1		1.35
0.1	0.5	0.2	0.35	0.95								0.1	0.2	0.3	0.15							0.45	0.25	0.25	0.1							1.85		0.2
0.45	1.5	1.3	0.3	0.2								0.6	0.25	0.1	0.2							0.15	5.6	2	1.2							1.85		1.1
0.1	0.3	0.1	0.15	0.15								0.1	0.4	0.75	0.2							0.25	1.15	0.45	2.15							0.1		0.95
1.1	0.55	0.1	0.9	0.1								0.6	0.25	1.05	0.35							1.3	0.35	0.8	0.45							1		0.3
0.55	0.95	0.75	0.9	0.1								0.3	1.3	1.7	0.65							0.15	0.45	0.3	0.15							0.3		2.25
0.2	0.3	0.5	0.3	0.4								0.15	0.2	0.1	0.65							0.1	0.4	0.1	0.15							0.2		0.5
0.25	0.15	0.15	0.95	0.15								0.1	0.1	0.35	0.2							0.25	0.3	0.35	0.7							0.5		2.2
0.55	0.6	0.95	0.2	0.95								0.8	0.55	0.2	0.75							0.15	1.1	0.5	0.1							0.1		0.15
0.15	0.25	0.1	0.2	0.3								0.25	0.25	2.8	0.15							0.4	1.75	0.65	1.05							0.2		2.65
0.45	0.55	0.15	0.35	0.45								0.15	0.95	1.05	0.15							0.2	0.3	0.25	0.35							0.7		0.45
0.45	0.3	0.15	0.95	0.4								0.25	0.1	0.15	0.15							0.65	0.65	0.2	0.25							0.4		0.2
0.2	0.1	0.5	0.55	1.25								0.1	3	0.65	0.5							0.55	0.1	0.7	1.25							0.8		0.55
0.15	0.2	0.15	0.25	0.3								0.8	0.5	0.15	1.25							0.3	0.15	0.9	1							2.5		0.3
0.45	0.15	0.1	1.05	0.45								0.3	0.1	0.1	0.75							0.7	0.85	0.15	0.25							0.1		0.3
2.15	0.1	0.4	0.25	1.65								0.75	0.45	1.55	0.85							0.3	0.4	0.3	0.7							3.7		0.1
0.95	0.45	0.15	0.85	0.35								0.9	0.1	0.6	0.3							0.1	0.2	0.1	0.45							0.9		0.25
0.75	0.1	1.1	0.1	0.2								0.45	0.9	0.55	0.1							0.6	0.45	0.25	0.2							1.35		0.1
0.1	0.15	0.45	0.85	0.25								1.4	1.05	0.85	0.15							0.2	0.3	0.4	0.2							0.5		0.5
0.85	0.15	0.25	0.1	0.45								0.1	0.2	0.15	0.3							1.3	0.35	1.1	0.5							1.4		0.35
0.1	0.45	0.15	0.3	0.2								0.2	0.25	0.45	0.1							0.4	0.1	0.15	0.15							0.45		1.65
0.25	0.75	0.2	1.25	0.1								3.9	0.25	0.1	0.6							1.25	0.2	0.35	2.65							3.5		2.85
0.6	0.1	1.2	0.2	0.1								0.15	0.15	0.1	0.25							0.55	0.35	1.5	0.5							2.05		0.45
0.3	0.1	0.25	0.15	0.1								0.25	0.35	0.2	0.15							0.15	0.3	0.35	0.15							1.75		1.45
0.25	0.2	0.15	1.8	0.75								0.1	0.2	0.25	0.15							0.7	0.4	0.6	0.2							0.75		0.25
0.8	0.35	0.1	0.1	0.6								0.3	0.25	0.25	0.65							0.45	1.3	0.4	0.1							2.2		1.05
0.3	0.3	0.5	0.25	0.5								1.1	0.95	0.1	0.25							0.2	0.3	0.15	0.85							1.05		1.95
1.85	0.1	1.05	0.7	1.85								0.6	0.2	0.9	0.7							0.25	0.9	0.2	0.25							2.95		0.7
0.2	0.35	0.15	0.15	0.3								1.25	0.65	0.4	0.35							0.1	0.85	0.4	4							0.1		0.25
0.2	0.15	0.25	0.1	1.9								0.35	0.3	1.5	0.35							0.1	1.3	0.15	0.2							0.25		0.95
2.75	0.2	0.4	0.25	0.35								0.5	0.85	0.7	0.1							0.1	0.3	1	0.4							0.5		0.9
0.7	0.15	0.25	0.55	0.8								0.1	0.1	0.7	0.25							0.1	0.2	0.45	0.1							0.3		0.45
0.75	0.25	0.2	0.4	0.1								0.6	0.3	0.1	0.25							0.45	0.35	0.55	0.75							0.5		1.75
0.7	0.3	0.5	0.15	0.4								0.9	0.1	0.4	0.1							0.3	2.2	0.45	0.15							2.05		1.15
0.4	1.9	0.1	0.85	0.45								0.1	0.85	0.1	0.75							1.35	0.1	2	0.3							0.2		0.3
0.45	0.1	0.35	0.2	0.4								0.1	0.15	0.1	0.6							0.5	0.3	0.25	1.6							0.6		0.4
0.4	0.15	0.2	0.1	0.2								0.85	0.15	0.2	1.2							0.95	0.75	0.3	1							1.9		3.5
0.55	0.85	0.35	0.25	2.35								0.1	0.1	1.15	0.55							0.2	0.1	0.6	0.9							0.45		0.8
0.65	0.35	0.55	0.2	0.85								0.1	0.55	0.45	0.15							0.45	0.35	0.3	0.2							0.25		0.7
0.8	0.45	1.6	0.65	0.4								0.25	0.4	0.15	0.15							5.15	0.35	0.35	0.3							0.1		1.6
0.4	0.45	0.35	0.35	0.3								1	0.1	0.3	0.5							2.4	0.65	0.5	0.6							0.55		3.55
0.6	2.25	0.45	0.3	0.3								0.4	0.1	0.3	0.2							1.1	0.25	2.75	0.9							0.3		2.45
1.65	0.35	1.95	0.3	0.1								0.4	0.35	0.5	1.15							0.3	0.3	1.25	0.3							0.25		2.3
0.35	0.45	0.95	0.55	0.3								0.15	0.15	0.1	1.05							0.1	0.6	0.75	1.9							0.1		0.8
0.4	0.2	0.55	0.15	0.15								0.85	0.9	0.3	0.45							0.5	0.3	0.7	0.85							0.75		0.35
0.8	0.75	0.2	0.1	0.2								0.85	0.4	0.3	0.4							0.8	1.25	0.35	0.4							0.5		1.65
0.3	0.55	0.1	0.1	1.9								1.05	0.2	1.85	0.35							0.85	0.3	1.4	0.8							1.75		0.15
0.25	0.3	0.7	0.85	0.25								0.7	0.8	0.1	0.4							0.35	0.45	0.15	1.35							2.9		0.15
0.85	0.55	0.4	0.15	0.1								0.4	0.45	0.15	0.35							0.2	1.1	3.65	1							0.1		0.4
0.1	0.8	0.85	0.65	0.25								0.25	0.3	0.4	0.15							0.1	1.35	3.5	0.3							0.4		0.35
1.05	0.2	0.1	0.2	1.6								2.5	0.15	0.65	0.2							0.6	0.3	0.95	1.4							2.2		0.15
0.35	0.1	0.3	0.8	0.5								0.25	0.35	0.2	0.3							0.35	1.25	0.25	0.4							0.85		0.1
0.7	0.35	0.15	0.95	0.15								0.7	0.1	0.5	0.4							0.15	0.25	0.7	0.15							0.85		0.85
1.6	0.2	1.6	0.1	0.6								0.9	1.05	0.1	0.1							0.15	0.4	0.95	1							0.15		0.85
0.25	0.1	1.9	0.45	0.3								0.15	0.2	0.35	0.1							0.9	1.7	0.25	1.9							0.75		0.35
0.25	0.55	0.45	0.25	0.25								0.2	0.1	0.75	0.4							0.2	0.2	0.55	0.2							0.45		0.65
0.8	0.55	0.35	0.3	0.1								0.65		0.35	0.45							0.1	1.05	0.1	0.3							0.45		0.75
0.1	0.45	0.85	0.15	0.35								0.4		0.15	0.85							1.8	0.3	0.25	0.75							0.5		0.2
0.3	0.6	0.2	1.85	0.45								0.15		0.15	0.7							0.4	0.1	0.3	0.55							1		3.65
0.35	0.1	0.1	0.45	0.25								1		1.65	0.25							3.55	0.2	0.1	0.45							0.4		1.15
0.25	0.6	0.15	0.9	0.45								0.45		0.1	0.2							0.15	0.2	0.6	0.75							2		0.15
0.5	0.4	1.7	0.6	0.2								0.2		1.35	0.5							0.5	1.65	0.35	0.8							0.15		0.35
0.35	0.95	0.3	0.15	0.3								0.3		0.15	0.3							0.25	1.25	0.1	0.4							0.2		1
0.3	0.25	0.15	0.55	0.1								0.25		0.15	0.2							0.7	0.1	0.25	0.5							0.8		0.25
0.35	0.1	0.55	0.9	0.4								0.65		1.5	0.15							0.4	0.85	0.75	0.1							0.45		0.2
0.25	0.25	0.35	0.15	0.1								0.1		0.95	0.35							1.3	0.2	0.1	0.1							1.05		0.7
0.65	1	0.55	0.35	0.2								0.85		0.3	0.1							3.1	0.1	0.2	0.6							1.25		1.5
0.5	0.1	0.2	0.45	0.45								0.8		0.1	1.9							0.15	0.6	0.3	2.35							0.75		0.5
0.35	0.1	0.35	1.65	0.3								0.25		0.1	0.25							0.2	0.35	1	0.45							0.25		0.1
1.6	0.4	1.5	0.2	0.35								0.35		1.65	0.45							0.3	1	0.3	0.35							0.15		0.7
0.45	0.55	0.3	1.05	0.35								1.25		1.45	0.3							0.15	0.2	0.25	1.5							0.9		0.1
0.3	0.5	0.3	0.1	0.2								0.5		0.5	1.6							0.15	1.9	0.1	0.35							0.5		1
0.25	2.25	0.25	0.2	0.55								0.3		0.1	0.25							0.4	0.4	1.45	0.35							1.55
0.2	0.2	0.2	0.45	0.5								0.2		0.25	0.25							0.25	0.9	0.4	0.95							2.75
1.75	0.3	0.5	0.7	0.65								0.65		0.45	0.1							0.4	1.25	0.65	0.75							0.3
0.25	0.25	1.1	0.25	0.35								0.8		1.55	0.45							1.95	0.5	0.5	0.95							1.2
0.7	0.35	2.15	1.1	0.45								0.4		0.2	0.15							1.1	0.25	0.15	0.3
0.2	0.6	1.35	0.35	0.1								1.1		0.3	1							0.35	0.35	0.1	0.95
0.15	0.1	0.35	0.2	0.65								0.75		1	0.2							0.2	0.6	2.05	0.85
1.45	0.5	0.1	0.3	0.25								0.1		2.3	0.2							1.45	0.15	1.45	0.7
1.2	0.15	1.35	0.65	0.25								0.75		0.15	0.5							0.35	0.3	0.75	0.2
0.8	0.35	0.1	0.4	0.1								0.25		0.7	0.25							1.1	0.15	0.1	0.65
0.1	1.65	2.5	0.5	0.25								0.35		0.1	0.75							0.35	0.2	0.15	0.1
0.1	0.5	0.35	1	0.5								0.4		0.7	0.2							0.55	1.5	0.55	0.45
0.6	0.9	0.85	0.1	0.15								0.15		0.8	0.1							0.1	0.75	0.2	0.6
0.95	0.7	1.7	0.1	0.25								0.2		0.3	0.35							0.8	0.15	2.35	0.1
1.15	0.25	0.15	0.25	0.1								0.15		0.5	0.3							0.25	0.5	0.55	0.55
0.2	0.5	0.15	0.55	1.15								0.95		0.15	0.2							0.1	0.15		0.2
2.05	0.8	1.5	0.2	0.25								1.65		0.9	0.8							0.9	0.9		0.65
0.15	0.45	0.9	0.35	0.6								1.6		0.1	0.15							2.1	0.1		0.6
0.3	0.25	0.35	0.5	0.2								0.6		0.35	0.7							0.1	0.15		1.35
0.1	0.15	1.35	1.6	1.95								10.25		0.15	1.05							0.35	0.1		0.95
0.15	1.35	0.75	0.1	0.55								0.2		0.25	0.3							0.25	0.15		0.8
0.45	0.1	0.7	0.4	0.1								1.2		0.45	0.45							0.45	1.15		0.8
0.15	0.15	0.1	0.55	0.1								0.15		0.45	0.4							0.85	0.55		0.45
0.35	0.6	0.3	0.15	0.45								0.35		1.5	0.15							0.1	0.75		0.15
0.8	0.45	0.6	1.8	0.45								0.25		0.5	0.35							0.1	1.95		0.35
0.3	1.9	0.6	0.3	1								0.7		0.3	0.15							0.1	0.35		0.8
1	0.55	1.05	0.15	1.6								0.15		0.2	0.25							0.1	0.6		0.15
0.25	0.65	0.5	0.55	0.5								0.6		1.3	1.7							0.1	0.1		0.2
0.3	0.1	0.35	2.25	0.5								1		0.65	1.1							0.5	1		0.15
0.3	0.35	0.25	0.65	0.5								0.6		0.55	0.4							1.6	0.9		0.3
0.85	0.2	0.4	0.1	0.1								0.1		0.3	0.1							0.15	0.85		0.5
0.65	0.7	0.85	0.25	0.3								0.2		0.25	0.1							0.3	0.6		0.65
0.15	0.2	0.6	0.15	0.4								2.55		0.2	0.2							0.2	0.35		0.5
0.6	0.15	0.15	0.15	0.75								1.7		0.1	1.05							0.1	0.35		0.1
1.1	0.75	0.25	1	0.4								0.35		0.7	0.4							0.25	0.5		0.25
0.3	0.55	1.4	0.7	0.25								1.15		0.5	0.25							1.4	0.45		0.2
0.5	0.2	0.4	0.35	1.25								0.65		0.2	0.35							0.85	0.45		0.75
0.1	1.2	0.2	0.75	0.85								1.65		0.2	1							0.5	0.9		0.1
1	0.3	0.55	0.6	1.95								0.15		0.25	1.25							1.1	0.85		0.15
1.15	1.25	0.15	0.6	0.1								0.15		0.8	0.5							0.15	0.2		0.25
0.1	1.15	0.2	0.65	0.5								0.2		0.2	1.65							0.1	0.85		0.3
0.15	0.3	0.2	0.2	0.15								0.35		0.2	0.2							0.35	0.4		0.3
0.45	0.3	0.25	0.9	1.5								0.3		0.55	0.1							0.45	0.35		0.25
0.45	0.1	1.7	0.2	0.3								0.2		0.15	1.25							0.8	0.2		0.6
0.7	0.3	0.5	0.1	0.35								0.2		1.6	0.2							0.5	1.3		0.15
0.5	0.25	0.15	0.55	0.15								0.75		0.1	0.9							0.3	0.25		0.15
1.35	0.3	0.3	0.1	1.4								0.45		0.2	0.3							0.5	0.15		0.2
0.9	0.45	0.1	1.3	0.35								0.65		0.1	0.1							0.3	0.1		0.2
1.65	0.25	0.5	0.35	0.1								0.5		0.45	0.1							0.3	0.15		0.15
0.15	0.15	0.45	0.1	0.3								0.8		0.15	0.1							0.5	0.1		0.15
0.15	1.3	0.5	0.1	0.45								0.1		0.8	0.4							0.1	0.9		0.35
0.45	0.65	0.15	0.55	0.15								0.45		0.15	0.5							1.2			0.2
0.15	0.25	0.1	0.35	0.35								1		0.25	0.4							0.15			0.7
0.2	0.1	1.15	0.65	1.05								0.2		0.15	0.1							0.15			0.2
0.1	0.35	0.15	0.2	0.15								0.25		0.55	0.1							0.1			1.85
0.4	0.55	0.1	0.3	0.8								0.95		0.15	0.2							0.25			0.7
0.25	0.5	0.4	0.65	0.25								0.9		1.1	0.3							0.15			0.2
0.2	0.25	0.2	0.1	0.1								0.6		0.65	0.5							0.8			1.55
0.15	0.1	0.55	0.1	0.25								0.65		0.8	0.6							0.6			2.3
0.2	0.15	0.3	0.1	0.15								1.5		0.4	0.2							0.3			0.3
0.15	0.3	0.25	0.4	1.5								0.3		0.7	0.35							0.1			0.8
0.4	0.45	0.5	0.85	0.55								0.5		0.2	0.15							0.15			0.2
0.7	0.65	0.15	0.55	0.55								1.05		0.2	0.4							0.6			0.1
0.1	0.25	0.1	0.25	0.1								0.4		0.1	0.85							0.75			0.45
0.3	0.7	0.1	0.45	1								0.1		1.7	0.4							0.65			0.1
0.35	0.55	0.2	0.3	0.6								0.95		0.75	0.15							0.5			2.1
0.55	0.2	1.3	0.1	0.6								0.15		0.1	1.3							1.5			0.1
0.4	0.45	0.2	1.8	0.1								0.3		0.2	0.2							1.2			1.1
0.4	0.1	0.1	0.3	1.6								0.2		0.1	0.2							4.85			0.45
0.15	0.15	1.4	0.45	0.25								0.2		0.4	0.1							0.2			0.35
1.35	0.55	0.15	0.1	1.1								0.25		0.5	0.75							0.8			0.25
0.75	0.1	0.7	0.45	0.8								0.65		1.75	0.55							0.25			0.4
0.85	0.1	0.4	0.6	0.1								0.9		0.35	0.15							0.45			0.7
0.2	0.2	0.15	0.6	0.1								0.4		0.8	1.3							0.15			0.1
0.3	0.6	0.25	0.3	0.2								0.5		0.5	0.95							0.45			0.15
0.95	0.35	0.4	0.55	1.15								0.95		0.45	0.1							2.45			0.2
0.7	0.45	0.3	0.5	0.1								2.15		0.15	0.35							0.25			0.35
0.55	0.15	0.1	0.15	1.1								0.15		0.4								0.2			0.75
0.5	0.25	0.85	0.1	0.25								0.3		1.3								0.4			0.15
0.15	0.55	0.15	0.25	1.1								0.2		0.1								0.15			0.3
0.1	0.45	0.1	0.7	0.1								0.75		0.65								0.15			0.55
0.9	0.45	0.65	0.1	0.5								0.3		0.4								0.3			0.15
0.4	0.6	0.3	0.1	0.3								1.2		0.35								0.6			0.15
0.7	0.45	0.15	0.2	0.15								0.1		0.1								0.4			1.95
0.2	1.05	0.8	0.1	1								1		0.4								0.25			1
0.15	0.15	0.45	0.75	0.4								0.25		0.25								0.15			0.25
0.85	0.8	1.1	1.5	0.1								1.05		0.5								0.3			0.3
0.85	0.15	0.45	0.1	0.9								1		0.5								0.3			0.35
0.3	0.9	0.15	0.2	0.1								0.3		0.2								0.65			2.05
0.45	0.35	0.5	0.35	0.2								0.2		0.5								0.3			1.4
0.45	0.1	0.4	0.15	0.3								0.15		1.9								1.5			0.95
0.1	1.15	0.1	0.4	0.3								0.2		0.25								0.85			0.1
1.9	1.15	1.1	0.15	0.35								0.4		0.2								1.1			0.3
0.15	0.65	0.15	0.15	0.3								0.45		0.95								0.6			0.15
0.1	0.15	0.25	0.45	0.1								0.9		0.3											0.35
0.45	0.5	0.25	0.1	0.5								0.2		0.1											0.15
0.85	0.1	1.1	0.45	0.15								0.8		2.65											0.4
0.5	0.65	0.4	0.25	0.35								0.65		0.3											1.95
1.1	0.65	0.35	0.1	0.6								0.7		0.15											1
0.1	0.7	0.2	0.45	0.1								0.35		0.15											0.1
0.35	0.15	0.4	0.5	0.6								0.15		0.15											0.8
0.45	1.25	1.45	0.1	0.1								1		0.4											1
0.1	0.1	0.1	0.45	0.15										0.35											0.3
0.6	0.95	0.15	0.2	0.8										0.2											0.7
0.15	0.7	0.15	0.15	1.95										0.6											0.7
0.1	1.05	0.4	0.15	0.65										0.85											0.35
0.15	0.3	0.2	0.35	0.2										0.7											0.4
1	0.55	0.25	0.2	0.7										0.3											0.2
0.15	0.15	0.15	0.15	0.15										0.7											0.1
0.55	0.55	0.2	1.2	0.15										0.5											0.5
0.3	0.55	0.4	0.15	0.25										0.5											0.4
0.3	0.3	0.65	0.6	0.6										0.25											0.15
0.65	0.35	0.9	0.1	0.15										0.1											0.25
1	0.1	0.9	0.15	0.85										0.1											2.35
1.2	0.15	0.55	0.1	0.1										1.45											0.5
0.3	1.85	0.7	0.6	0.7										0.15											0.35
0.1	0.1	0.1	0.3	0.55										1.65											0.3
0.2	0.25	0.25	0.75	0.15										0.35											0.1
0.45	0.2	0.35	0.6	1.8										0.2											0.15
0.9	0.3	0.35	0.7	1.35										0.7											0.4
0.15	0.15	0.5	0.25	0.1										0.2											0.4
0.65	0.3	1.3	0.6	0.25										0.8											0.2
0.6	0.3	0.45	0.35	0.15										0.25											1.35
0.1	0.3	1.85	0.25	0.4										1.85
0.6	0.1	0.45	0.75	2										0.35
0.6	0.8	0.5	0.4	0.35										0.45
0.2	0.3	0.5	0.5	0.8										0.3
0.35	0.25	0.5	1	1.75										0.1
0.1	0.5	0.1	0.3	0.85										0.2
0.35	0.45	0.55	0.45	0.3										0.4
0.55	0.1	0.1	0.65	0.7										0.85
0.1	0.5	0.15	0.4	0.25										0.15
0.8	0.75	0.4	0.15	0.65										0.35
0.4	0.35	0.1	0.1	0.75										1.15
0.1	0.15	0.65	1.2	0.5										1.15
0.45	1.1	0.95	0.6	0.1										1.55
0.15	0.1	0.55	2.3	0.55										0.6
0.15	0.1	0.4	0.25	0.55										0.25
0.6	0.3	0.2	0.2	0.25										0.3
0.1	2.05	0.85	0.4	1.45										0.35
0.7	0.1	1	0.35	0.15										0.6
0.8	1.35	0.1	0.15	1.05										0.35
0.45	1.9	0.25	0.1	0.55										1.65
0.15	0.5	0.2	0.15	0.35										0.25
0.75	0.6	2.05	1.35	0.1										0.25
0.4	0.55	0.45	0.35	0.25										0.15
0.1	0.7	0.35	0.5	0.4										0.4
1.55	0.45	0.2	0.1	0.45										0.6
0.9	0.1	0.55	0.55	0.5										0.3
0.15	0.45	0.25	1.2	0.55										0.2
0.5	0.25	0.15	0.5	0.1										0.45
0.1	0.3	2.25	2.15	0.1										0.4
0.1	0.55	0.25	0.25	0.45										0.55
0.85	0.2	0.2	0.5	0.75										0.15
1.4	0.15	0.5	0.75	0.1										0.25
0.3	0.3	0.9	0.55	0.4										0.35
0.1	0.4	0.55	0.35	0.2										1.3
0.1	0.15	0.2	0.1	0.6										0.1
0.1	0.6	0.55	0.4	0.1										0.8
0.2	0.6	2.35	0.25	0.3										1.05
0.4	0.5	0.65	0.65	0.45										0.2
0.15	0.15	0.25	0.55	1.1										0.25
0.55	0.5	0.1	1	0.3										0.1
0.55	0.85	0.35	1.05	1.25										0.1
0.25	0.2	0.2	0.5	0.5										0.15
1	2.35	0.1	1	1.3										0.1
0.4	0.7	0.4	0.1	0.3										0.1
1.1	0.55	0.2	0.2	0.25										1.05
0.2	0.2	1.5	0.6	0.85										0.35
2.55	2.4	0.1	0.25	0.2										0.2
0.2	0.25	0.45	0.2	0.15										0.8
1.2	0.1	0.2	0.25	0.15										2.75
0.4	1.6	0.25	0.4	0.3										0.3
0.9	0.35	1.15	0.4	0.1										0.4
0.25	0.25	0.2	0.75	0.15										1.2
0.15	0.25	0.25	0.25	2										0.4
0.35	0.15	0.85	0.2	0.45										0.25
0.2	1.95	0.2	1.45	0.1										0.65
0.2	0.2	2	1.5	0.35										0.1
0.35	0.5	0.1	1.35	0.1										0.2
0.15	0.3	0.25	0.6	0.1										0.2
0.3	0.1	0.2	0.3	0.3										1.15
0.2	0.6	0.2	0.2	0.2										0.45
0.25	0.1	0.45	1.75	0.1										0.1
0.3	0.2	0.2	0.4	1										1.15
0.1	1	0.25	0.85	0.4										0.4
0.25	0.1	0.6	0.3	0.15										1.25
0.5	0.2	0.35	0.9	0.15										0.75
0.35	0.75	0.4	0.7	0.1										0.35
0.5	0.5	0.1	0.45	0.15										0.3
0.4	1.05	0.45	0.15	0.45										0.25
0.25	0.5	0.1	0.15	0.55										0.15
0.85	0.35	0.25	0.15	0.95
0.3	0.5	1.45	0.5	0.25
3.4	0.2	0.3	0.55	0.7
1.65	0.35	0.25	0.25	0.6
0.3	0.4	0.6	0.15	0.5
0.1	1.5	0.15	0.7	0.1
0.15	0.8	0.65	0.3	0.6
0.5	0.2	0.95	0.35	0.65
0.15	1.4	0.3	0.15	1.05
1.75	0.1	1.75	0.2	1.85
0.65	0.6	0.15	0.4	0.7
0.8	0.5	1.1	0.45	1.15
0.3	2.35	0.9	0.2	0.15
0.85	0.25	0.25	0.5	0.1
0.35	0.15	0.45	0.65	0.2
0.95	0.1	1.3	0.15	0.15
0.45	0.25	0.8	0.1	1.6
0.1	0.1	0.55	1.65	0.1
0.5	0.1	0.35	0.5	0.4
1.15	0.3	0.1	0.3
1	0.25	0.25	0.1
1.4	0.55	0.1	0.15
0.35	0.3	0.45	0.2
1.05	0.5	0.45	0.3
1.55	0.55	0.3	0.1
0.25	0.7	0.3	0.4
0.15	0.5	0.2	0.45
0.5	0.4	0.45	0.6
0.45	0.1	0.3	0.75
0.65	0.9	0.2	0.3
0.35	0.25	0.9	0.8
0.5	0.1	0.2	0.2
0.5	0.55	0.3	0.15
1.05	0.15	0.1	1.45
0.15	0.25	0.7	0.15
0.45	0.3	0.55	0.45
0.35	0.25	0.55	0.2
0.15	1.1	0.6	1.4
0.2	0.1	0.3	0.8
0.25	0.2	0.3	0.3
0.85	0.25	0.55	0.55
0.8	0.3	0.35	0.15
0.2	0.25	0.8	0.1
0.25	0.1	0.5	0.6
0.45	2.2	0.4	0.95
0.1	0.65	0.15	0.4
0.95	0.25	1.25	0.55
0.15	1.35	0.6	0.1
0.35	0.1	0.3	1.1
0.15	0.3	0.15	0.55
0.2	0.45	0.65	0.6
1.1	0.15	0.25	0.15
0.1	0.1	0.2	0.1
0.15	0.15	0.1	0.3
0.35	1.5	0.2	0.5
0.5	0.55	0.4	0.65
0.8	0.5	0.3	2.5
0.1	0.15	1.05	0.1
0.25	0.15	0.3	0.25
0.15	0.15	0.15	0.15
0.2	0.45	0.5	0.35
0.1	0.75	0.25	0.1
0.1	0.3	0.1	0.85
0.1	0.75	0.2	0.15
0.1	0.2	0.1	0.15
0.3	0.15	0.3	0.6
0.75	1.2	0.5	0.1
2.85	2.05	0.3	0.4
0.25	0.15	0.55	0.85
0.4	1	0.25	0.65
0.1	2.1	0.6	0.15
0.15	1.15	0.3	0.95
0.35	0.65	0.8	0.95
0.2	0.1	0.3	0.8
0.1	0.1	0.15	0.7
0.35	0.25	2.3	0.9
0.3	2.05	0.65	0.55
1.6	0.1	0.25	0.35
1.2	0.1	0.5	0.25
0.25	2.35	0.3	0.15
0.3	0.1	0.9	0.45
0.2	0.45	0.25
1.45	0.2	0.4
0.2	0.45	1
1.25	0.15	0.3
0.9	0.6	0.1
0.1	0.8	0.95
0.1	0.3	0.55
0.3	0.95	0.1
0.4	0.3	0.75
0.45	0.35	0.35
0.1	0.2	0.3
0.35	0.5	0.6
0.15		1.4
1.05		1.25
0.3		0.1
0.8		0.45
1		0.2
0.95		0.25
0.45		0.15
0.15		1.65
0.25		0.25
1.85		0.2
0.2		0.15
0.35		0.35
0.7		1.6
0.45		0.95
1.25		0.9
0.45		0.8
0.75		0.1
0.5		0.75
1.5		0.5
1.05		0.8
0.1		1
0.55		0.35
0.1		0.25
		0.55
		1.15
		0.65
		0.35
		0.15
		0.15
		0.95
		0.55
