# Supplementary material for: Membrane-mediated dimerization potentiates PIP5K lipid kinase activity
Source: eLife. 2022 Aug 17;11:e73747. doi: 10.7554/eLife.73747 (PMC9470164; doi:10.7554/eLife.73747)
Supplement: Figure 2—source data 2. [file elife-73747-fig2-data2.xlsx]

## Sheet: Figure 2C
Figure 2C		this spreadseet contains all the data used to calculate the mean diffusion coefficients in Table 1 that are associated with Figure 2C
1 pM Ax647-5KB												1 pM Ax647-5KB + 200 pM 5KB										1 pM Ax647-5KB + 1 nM 5KB										1 pM Ax647-5KB + 5 nM 5KB										1 pM Ax647-5KB + 10 nM 5KB
Step size (µm, raw data)					Probability Density							Step size (µm, raw data)				Probability Density						Step size (µm, raw data)				Probability Density						Step size (µm, raw data)				Probability Density						Step size (µm, raw data)			Probability Density
mov 1	mov 2	mov 3	mov 4	mov 5	BIN step size (µm)	mov 1	mov 2	mov 3	mov 4	mov 5		mov 1	mov 2	mov 3	mov 4	BIN step size (µm)	mov 1	mov 2	mov 3	mov 4		mov 1	mov 2	mov 3	mov 4	BIN step size (µm)	mov 1	mov 2	mov 3	mov 4		mov 1	mov 2	mov 3	mov 4	BIN step size (µm)	mov 1	mov 2	mov 3	mov 4		mov 1	mov 2	mov 3	BIN step size (µm)	mov 1	mov 2	mov 3
0.902252	0.176287	0.18198	0.275915	0.303581	0	0.0708316	0.0919963	0.10585	0.106642	0.112649		0.0574275	0.116545	0.0501328	0.0560306	0	0.095273	0.114036	0.084687	0.0852442		0.0344115	0.147751	0.215035	0.129856	0	0.111802	0.118396	0.122109	0.161064		0.112922	0.139947	0.0376848	0.149598	0	0.21028	0.172018	0.168227	0.224565		0.0574103	0.0828366	0.187868	0	0.150376	0.210383	0.166867
0.300371	0.239799	0.130118	0.143122	0.102294	0.01	0.842896	0.766636	0.896196	0.700792	0.796588		0.179545	0.0871945	0.191767	0.343736	0.01	0.776841	0.788748	0.816075	0.767198		0.107719	0.286593	0.127445	0.202861	0.01	1.02019	1.09516	1.09898	0.987395		0.0201291	0.257489	0.330982	0.0704182	0.01	1.25584	1.39526	1.42433	1.42848		0.143726	0.0499891	0.25983	0.01	1.55388	1.44174	1.5552
0.0956646	0.0511076	0.179518	0.10753	0.0329919	0.02	1.42371	1.49494	1.73594	1.47014	1.35179		0.184818	0.143534	0.212828	0.162246	0.02	1.31916	1.67253	1.51667	1.40653		0.101816	0.0571773	0.0746418	0.112321	0.02	1.98449	2.01273	2.17641	2.28291		0.201744	0.198962	0.0987599	0.256617	0.02	2.71612	2.37003	2.62435	2.87568		0.102357	0.0879983	0.0636477	0.02	3.02632	3.0753	2.97691
0.219003	0.33323	0.251047	0.35089	0.139786	0.03	2.08245	2.20791	2.45572	2.2014	1.96331		0.107316	0.0162079	0.129403	0.155945	0.03	2.30121	2.51829	2.01709	2.24192		0.194502	0.297813	0.182538	0.188467	0.03	3.17937	2.98949	3.103	3.10924		0.137857	0.0802162	0.216339	0.162901	0.03	3.61565	3.64424	3.76829	3.9486		0.0743704	0.123005	0.158086	0.03	4.24185	4.21385	3.92471
0.200493	0.132262	0.135712	0.13896	0.0891667	0.04	2.68452	2.65256	3.19667	2.71938	2.69553		0.191426	0.811942	0.0585161	0.121579	0.04	2.74826	2.79388	2.88706	2.66814		0.0628805	0.338303	0.243051	0.124524	0.04	3.58466	3.51487	3.95058	3.68347		0.243178	0.236357	0.137986	0.0216533	0.04	4.90654	4.8866	4.61504	4.44763		0.321479	0.0731528	0.103509	0.04	5.30075	4.85118	5.12615
0.0103758	0.0164015	0.159704	0.117053	0.183512	0.05	3.59116	3.22754	3.40131	3.26021	3.09784		0.137677	0.298155	0.233066	0.140721	0.05	3.10004	3.43058	3.41828	3.40124		0.0706531	0.215847	0.123006	0.0596942	0.05	4.54895	4.12905	4.33846	4.32073		0.246384	0.164392	0.159908	0.258262	0.05	5.5257	5.35805	5.23187	5.63284		0.220109	0.292075	0.154635	0.05	6.07769	6.00829	5.76692
0.191658	0.242797	0.0569674	0.106255	0.0741228	0.06	3.71866	3.50353	4.07875	3.39732	3.26682		0.285706	0.136686	0.230157	0.210921	0.06	3.87688	3.4876	3.86481	3.6996		0.286391	0.126137	0.0806392	0.0173934	0.06	4.70268	4.81723	4.55394	4.36975		0.20127	0.145416	0.535414	0.191955	0.06	5.93458	5.8104	5.61319	5.97592		0.115736	0.126806	0.231828	0.06	5.93985	6.28674	5.97384
0.181863	0.101023	0.0702196	0.0669116	0.256674	0.07	4.51905	4.00184	4.06464	3.83151	3.8542		0.107755	0.125736	0.0572088	0.161139	0.07	3.88421	4.08629	3.9341	4.09172		0.266101	0.0257374	0.122309	0.180814	0.07	4.6887	4.79503	4.80534	4.73389		0.127339	0.121765	0.0783307	0.0835509	0.07	5.66005	5.94419	5.80945	5.75136		0.0905821	0.0875987	0.19541	0.07	6.39724	6.42287	6.31424
0.00959996	0.0331799	0.0491056	0.289527	0.17864	0.08	4.39864	4.46182	4.38925	4.25807	4.53814		0.131841	0.0921123	0.181417	0.59177	0.08	4.34591	4.30486	4.05728	3.81042		0.114254	0.188943	0.06845	0.166962	0.08	5.10796	5.11322	4.9059	4.76891		0.0664442	0.160483	0.138586	0.0612934	0.08	5.50234	5.74032	5.82628	6.05078		0.231095	0.130148	0.166276	0.08	6.27193	6.03304	6.12068
0.144741	0.0937939	0.29257	0.303009	0.186025	0.09	4.41989	4.49249	4.54449	4.45612	4.6347		0.225924	0.132772	0.315499	0.290795	0.09	4.81495	4.4569	4.27285	4.015		0.153962	0.291977	0.0595376	0.296799	0.09	4.67473	5.09102	4.82689	5.07003		0.0737156	0.167984	0.405296	0.0779654	0.09	5.36799	5.68935	5.50664	5.45817		0.866803	0.154453	0.137764	0.09	5.88972	5.97735	6.29422
0.291328	0.0657054	0.167564	0.0796277	0.238246	0.1	4.68905	4.74548	4.7068	4.60085	4.59446		0.0657873	0.105476	0.174087	0.265036	0.1	4.6244	4.37138	4.29594	4.28778		0.0732794	0.226488	0.265045	0.0769246	0.1	5.16386	4.53604	5.16449	4.67087		0.136889	0.13238	0.0711595	0.190744	0.1	5.18107	5.35168	5.17019	5.58293		0.271492	0.0228214	0.165417	0.1	5.36967	5.81028	5.78027
0.14971	0.122073	0.075456	0.0612167	0.122586	0.11	5.00071	4.78381	4.45981	4.61609	4.71516		0.0342684	0.278668	0.155569	0.095567	0.11	4.66838	4.49492	4.67319	4.4327		0.166079	0.186936	0.0253808	0.12388	0.11	4.42317	4.45464	4.35282	4.55182		0.149287	0.0672651	0.0757503	0.147592	0.11	4.74299	5.16055	4.97953	5.0839		0.109206	0.198178	0.0397153	0.11	5.40727	5.29051	5.68015
0.278469	0.146092	0.772432	0.172995	0.159866	0.12	4.95113	4.76848	4.16343	4.87508	4.57033		0.392303	0.0950523	0.249013	0.13937	0.12	4.67571	4.90354	4.32674	4.67991		0.211493	0.252179	0.163204	0.183168	0.12	4.43715	4.19565	4.43902	4.34174		0.147923	0.188292	0.0230871	0.348435	0.12	4.78972	4.59353	4.42999	4.41021		0.0234093	0.214273	0.0468649	0.12	4.54261	4.56036	4.77907
0.15399	0.110348	0.134336	0.0925423	0.270185	0.13	4.7103	4.57682	4.53038	4.80652	4.86804		0.238258	0.285592	0.122484	0.110358	0.13	4.6244	4.51392	4.5962	4.57761		0.160228	0.114291	0.252288	0.093908	0.13	4.12969	4.16605	4.38874	4.10364		0.10587	0.496087	0.121163	0.234693	0.13	4.6028	4.33231	4.21129	4.03593		0.0845023	0.0708023	0.0388567	0.13	4.42356	4.26954	4.1917
0.100049	0.220425	0.0755824	0.194358	0.147021	0.14	4.89446	4.56915	4.15638	4.41042	4.28066		0.477707	0.246537	0.114954	0.187294	0.14	4.33126	4.27635	4.51151	4.18549		0.247938	0.274518	0.158099	0.078987	0.14	3.8432	4.11425	3.74946	3.69748		0.304789	0.226022	0.07518	0.208469	0.14	3.95444	4.06473	3.8468	3.84256		0.159483	0.0776019	0.183388	0.14	3.87845	3.96634	3.84461
0.127636	0.11997	0.283993	0.147341	0.27301	0.15	4.35614	4.00951	4.78442	4.12858	4.17605		0.142826	0.134107	0.155697	0.0974815	0.15	4.06742	4.19082	4.32674	4.12582		0.0297125	0.133023	0.0516121	0.172146	0.15	3.85717	3.73687	3.59144	3.80952		0.207837	0.269597	0.202838	0.0854333	0.15	3.50467	3.28746	3.56081	3.39343		0.112377	0.175402	0.108409	0.15	3.3396	3.21143	3.32399
0.23428	0.048225	0.0805511	0.0838617	0.179129	0.16	3.93115	4.34683	3.90939	4.16667	4.19215		0.154128	0.214059	0.142953	0.101239	0.16	4.02345	3.87722	3.88021	4.13434		0.131218	0.131961	0.160776	0.32382	0.16	3.2213	3.65547	3.37595	3.27731		0.0554153	0.101432	0.231181	0.0834592	0.16	3.07243	3.3448	3.258	3.29986		0.173377	0.102298	0.0796734	0.16	3.23935	3.25475	3.0837
0.226976	0.140897	0.891281	0.0854169	0.0403124	0.17	4.20739	4.13983	3.91645	4.12096	3.94271		0.0677772	0.189956	0.0984292	0.245592	0.17	3.6277	3.96275	3.76472	3.69107		0.201537	0.238946	0.134703	0.0269482	0.17	3.39599	3.10049	3.7351	3.41737		0.295608	0.0614761	0.339698	0.342194	0.17	2.9264	3.03899	3.21875	2.96925		0.0755035	0.0468958	0.287356	0.17	2.9198	2.86492	2.76999
0.12172	0.0804512	0.22692	0.0638555	0.161085	0.18	3.70449	3.94051	3.58479	3.52681	3.7335		0.200952	0.201053	0.210788	0.10069	0.18	3.63503	3.60163	3.84941	3.71665		0.0873453	0.14163	0.325707	0.0773241	0.18	3.11648	3.10789	3.05272	3.38936		0.129589	0.115002	0.00981266	0.113828	0.18	2.78037	2.91794	2.73089	2.28308		0.173528	0.229025	0.106876	0.18	2.75063	2.41322	2.30944
0.165582	0.0212456	0.0829171	0.189842	0.150337	0.19	3.45658	3.68752	3.28135	3.51158	3.53235		0.218703	0.181125	0.180523	0.217579	0.19	3.33455	3.53511	3.32589	3.34157		0.267536	0.15445	0.0829168	0.0783764	0.19	2.89987	3.09309	3.02399	3.03221		0.21742	0.116768	0.113347	0.09476	0.19	2.34229	2.31269	2.62996	2.32674		0.155534	0.392122	0.103984	0.19	2.37469	2.16571	2.27606
0.362334	0.0726182	0.199812	0.19169	0.122609	0.2	3.29367	3.27354	3.23195	3.6106	3.299		0.142022	0.132149	0.153026	0.0634612	0.2	3.05606	2.92692	2.86396	3.16256		0.185011	0.15699	0.330067	0.167784	0.2	2.78108	2.6861	2.62175	2.61204		0.0581349	0.216122	0.150503	0.120776	0.2	2.33061	2.15979	2.29911	2.11465		0.384339	0.249944	0.117779	0.2	1.84837	2.06052	2.0024
0.195249	0.174831	0.144654	0.148781	0.0273515	0.21	2.91118	3.02821	2.83678	3.15356	3.13808		0.109486	0.187254	0.329616	0.132781	0.21	2.96812	3.06947	2.94865	2.82158		0.130907	0.405499	0.242728	0.218893	0.21	2.42471	2.7601	2.34162	2.43697		0.0572979	0.26948	0.153129	0.193283	0.21	2.14369	1.92406	1.92901	2.09594		0.290648	0.0448934	0.341215	0.21	1.69799	1.67688	1.67534
0.0669085	0.0756532	0.104032	0.158326	0.130965	0.22	2.7341	2.64489	2.69565	2.69653	2.62311		0.213961	0.164981	0.0609651	0.106479	0.22	2.7336	2.94593	2.77158	2.6511		0.101233	0.0486192	0.243921	0.0880155	0.22	2.33387	2.41231	2.18359	2.20588		0.469149	0.141842	0.222053	0.241572	0.22	1.7465	1.8922	1.88975	1.76533		0.193828	0.127043	0.101042	0.22	1.52882	1.63356	1.60192
0.184808	0.212122	0.120612	0.111145	0.0357013	0.23	2.25953	2.40724	2.51217	2.30804	2.49437		0.0192113	0.150252	0.165064	0.136295	0.23	2.38182	2.35674	2.44823	2.53175		0.16116	0.135477	0.148924	0.175582	0.23	2.07533	2.24212	2.13331	1.9888		0.0394764	0.260992	0.128589	0.14084	0.23	1.67056	1.67559	1.62059	1.57819		0.127931	0.227419	0.0849196	0.23	1.23434	1.59025	1.29489
0.111128	0.205034	0.295897	0.125066	0.197426	0.24	1.91245	2.23858	2.18051	2.20902	2.36563		0.191131	0.192212	0.0746987	0.218686	0.24	2.18395	2.11917	2.23266	2.41241		0.205494	0.0495706	0.0888796	0.294307	0.24	1.77486	2.02013	1.73826	1.85574		0.190334	0.123095	0.0697995	0.180424	0.24	1.45444	1.17864	1.63741	1.48462		0.0311512	0.0907885	0.0841873	0.24	1.12782	1.23136	1.37498
0.229814	0.269631	0.124271	0.108168	0.129776	0.25	1.79912	2.06992	1.86296	1.95003	1.68169		0.178924	0.116693	0.0945624	0.293336	0.25	2.04471	1.83408	1.82462	1.8839		0.197111	0.144687	0.391711	0.0870856	0.25	1.68402	1.70194	1.52277	1.81373		0.134679	0.142997	0.0364356	0.139349	0.25	1.37266	1.39526	1.46358	1.22887		0.183394	0.0730007	0.0608503	0.25	1.0213	1.22517	1.25484
0.222989	0.111498	0.175068	0.110848	0.154716	0.26	1.54413	1.50261	1.70066	1.65296	1.83457		0.134818	0.151065	0.120289	0.132379	0.26	1.75156	1.5965	1.77073	1.96914		0.314255	0.143902	0.138972	0.230938	0.26	1.67004	1.62794	1.65924	1.56162		0.0711684	0.262556	0.322411	0.0555898	0.26	1.26168	1.18502	1.18881	1.07292		0.155724	0.451259	0.100749	0.26	0.964912	1.06429	0.934455
0.1622	0.281803	0.0426581	0.289235	0.226361	0.27	1.46621	1.47194	1.41839	1.40158	1.68169		0.158036	0.0276236	0.0925048	0.158552	0.27	1.64896	1.72004	1.79383	1.5003		0.147714	0.155166	0.199455	0.272986	0.27	1.36958	1.17656	1.37193	1.68768		0.0267094	0.218907	0.282393	0.0462716	0.27	1.10397	1.10856	1.03179	1.06045		0.0399839	0.162509	0.0643671	0.27	0.927318	0.884846	0.887732
0.229986	0.0618134	0.111269	0.101829	0.373074	0.28	1.21122	1.32628	1.17141	1.24162	1.41616		0.175993	0.0856103	0.150594	0.0564516	0.28	1.44375	1.38744	1.42428	1.47473		0.189219	0.146784	0.105728	0.186369	0.28	1.33464	1.26535	1.36475	1.33754		0.0115143	0.0774489	0.129498	0.22396	0.28	0.946262	1.10219	0.897213	1.03549		0.131095	0.317346	0.0135157	0.28	0.739348	0.71159	0.647444
0.0782023	0.131207	0.155877	0.101227	0.155777	0.29	1.26788	1.18829	1.12201	1.15783	1.18281		0.165571	0.169124	0.106961	0.101986	0.29	1.39978	1.10235	1.15482	1.35538		0.299025	0.0873451	0.352291	0.0944222	0.29	1.15995	1.10256	1.19236	1.29552		0.175915	0.2735	0.0408515	0.059314	0.29	0.735981	0.84735	0.829922	0.879546		0.162187	0.216746	0.170003	0.29	0.776942	0.631149	0.674142
0.0971139	0.193915	0.151325	0.12831	0.188421	0.3	0.849979	0.919963	1.1079	1.11213	1.01384		0.0979214	0.240254	0.141657	0.0841047	0.3	0.908758	0.893281	1.09323	1.38948		0.112011	0.0317603	0.120567	0.0753137	0.3	1.132	0.947166	0.876311	0.812325		0.111674	0.032506	0.046393	0.217914	0.3	0.753505	0.764526	0.67291	0.761026		0.0853112	0.0209636	0.230377	0.3	0.469925	0.501207	0.607396
0.149599	0.0509459	0.112133	0.275265	0.1605	0.31	0.764981	0.774302	0.86797	0.815052	0.901191		0.225437	0.119177	0.212973	0.351475	0.31	0.95273	0.959802	1.13173	1.0485		0.239206	0.211057	0.0334581	0.0658708	0.31	0.901405	0.651177	1.01997	0.917367		0.191544	0.0740221	0.105816	0.220873	0.31	0.660047	0.458716	0.740201	0.648743		0.0433774	0.210108	0.0498335	0.31	0.47619	0.563084	0.540649
0.159518	0.212058	0.0295295	0.149067	0.243355	0.32	0.78623	0.689972	0.733893	0.891225	0.893145		0.116913	0.268992	0.369563	0.258667	0.32	0.908758	0.893281	0.900762	0.988833		0.457058	0.212287	0.0879864	0.217903	0.32	0.838516	0.754773	0.682373	0.805322		0.117727	0.0418453	0.0269856	0.293489	0.32	0.531542	0.490571	0.628049	0.561412		0.178764	0.281022	0.185866	0.32	0.338346	0.451705	0.440529
0.113797	0.280501	0.335216	0.0318362	0.126204	0.33	0.573736	0.521312	0.522193	0.716027	0.643708		0.195864	0.252519	0.263028	0.137937	0.33	0.67424	0.541671	0.731388	0.724576		0.206299	0.117267	0.1137	0.288315	0.33	0.705751	0.82137	0.668007	0.812325		0.224392	0.0665111	0.0398819	0.170045	0.33	0.502336	0.458716	0.426176	0.355561		0.136319	0.248143	0.266584	0.33	0.438596	0.278448	0.460553
0.0641238	0.303613	0.0626451	0.116532	0.0928779	0.34	0.410823	0.559644	0.564533	0.533211	0.450595		0.170711	0.0780385	0.239994	0.10442	0.34	0.556981	0.617695	0.546616	0.656381		0.187931	0.1616	0.209665	0.142471	0.34	0.559011	0.599378	0.581813	0.623249		0.114341	0.0393431	0.713404	0.0961845	0.34	0.373832	0.395005	0.392531	0.349323		0.0989986	0.0387701	0.190484	0.34	0.263158	0.315575	0.347083
0.0933266	0.149617	0.0823798	0.087579	0.0403352	0.35	0.432073	0.429316	0.48691	0.487508	0.514966		0.0745196	0.0468185	0.113026	0.0897824	0.35	0.556981	0.579683	0.708292	0.630807		0.0677698	0.319457	0.193879	0.122718	0.35	0.572986	0.510582	0.57463	0.497199		0.304299	0.266553	0.0574556	0.225728	0.35	0.473131	0.350408	0.330847	0.41794		0.199144	0.283789	0.0366298	0.35	0.288221	0.216571	0.240288
0.0577626	0.0370191	0.156325	0.0994221	0.0719736	0.36	0.389574	0.33732	0.352833	0.335161	0.402317		0.0899024	0.22907	0.202902	0.1716	0.36	0.520337	0.47515	0.500423	0.451794		0.216301	0.132943	0.0714314	0.0676144	0.36	0.454196	0.429185	0.395058	0.455182		0.111051	0.124603	0.242245	0.177663	0.36	0.245327	0.324924	0.302809	0.255754		0.114878	0.0637699	0.102092	0.36	0.369674	0.27226	0.220264
0.127204	0.478719	0.0849943	0.034761	0.222585	0.37	0.290409	0.344986	0.345777	0.335161	0.345993		0.100035	0.187266	0.336732	0.236216	0.37	0.33712	0.304096	0.354146	0.434746		0.16762	0.232696	0.194851	0.0718358	0.37	0.307456	0.458783	0.409424	0.287115		0.070246	0.247521	0.212604	0.207172	0.37	0.268692	0.2421	0.302809	0.26823		0.0553214	0.227156	0.755124	0.37	0.206767	0.179444	0.226939
0.173136	0.19762	0.14123	0.138473	0.17061	0.38	0.226661	0.275989	0.289323	0.388483	0.313808		0.123243	0.0691199	0.107422	0.225089	0.38	0.315134	0.370617	0.461929	0.409172		0.159104	0.0453552	0.0708692	0.0592341	0.38	0.349382	0.369987	0.42379	0.427171		0.336716	0.211117	0.162172	0.192066	0.38	0.21028	0.267584	0.201873	0.243279		0.133612	0.0242399	0.124732	0.38	0.175439	0.222758	0.166867
0.0520779	0.167842	0.177609	0.134621	0.111163	0.39	0.212495	0.176326	0.246983	0.220902	0.297715		0.15363	0.150335	0.493584	0.105941	0.39	0.300476	0.323102	0.246362	0.323928		0.0799469	0.780342	0.184941	0.0153811	0.39	0.349382	0.325588	0.330412	0.315126		0.172076	0.257721	0.133363	0.139515	0.39	0.192757	0.203874	0.168227	0.280706		0.032578	0.114586	0.0831477	0.39	0.137845	0.13613	0.146843
0.105754	0.113349	0.199924	0.158835	0.116208	0.4	0.155829	0.206992	0.23287	0.228519	0.217251		0.0193274	0.146793	0.282038	0.163218	0.4	0.219861	0.218569	0.192471	0.315404		0.142809	0.474754	0.2715	0.180237	0.4	0.244567	0.229392	0.179572	0.266106		0.0840893	0.207041	0.218675	0.283883	0.4	0.192757	0.127421	0.168227	0.218327		0.286322	0.160855	0.136035	0.4	0.112782	0.111379	0.206915
0.162602	0.157177	0.125798	0.0514484	0.4953	0.41	0.177079	0.145661	0.183473	0.129494	0.136788		0.101578	0.0765471	0.114026	0.169746	0.41	0.256504	0.275587	0.230965	0.264257		0.0958121	0.0666635	0.147989	0.0569147	0.41	0.174691	0.251591	0.215486	0.273109		0.0819026	0.0819814	0.0582064	0.388605	0.41	0.163551	0.152905	0.190658	0.168424		1.09585	0.20639	0.059384	0.41	0.162907	0.0990038	0.0934455
0.12818	0.0647377	0.606975	0.221792	0.0629242	0.42	0.092081	0.122662	0.141133	0.152346	0.168973		0.192194	0.140772	0.0890492	0.0581493	0.42	0.146574	0.199563	0.223266	0.255733		0.135158	0.192421	0.0777431	0.176906	0.42	0.181678	0.192393	0.201121	0.203081		0.0607606	0.0600679	0.170773	0.145515	0.42	0.146028	0.127421	0.123367	0.162186		0.171743	0.115395	0.0711294	0.42	0.106516	0.105192	0.0533974
0.0490768	0.113635	0.151596	0.146931	0.142062	0.43	0.120414	0.16866	0.16936	0.182815	0.0885098		0.177432	0.179151	0.0952285	0.149488	0.43	0.153903	0.123539	0.146278	0.15344		0.111988	0.173854	0.065842	0.0186497	0.43	0.202641	0.110996	0.193938	0.12605		0.0979151	0.0837806	0.0293098	0.0798559	0.43	0.122664	0.108308	0.112152	0.0810929		0.0992769	0.137487	0.116405	0.43	0.0689223	0.0680651	0.0867708
0.24947	0.0725277	0.151313	0.196644	0.0832675	0.44	0.092081	0.0996627	0.112907	0.129494	0.0965562		0.083374	0.143541	0.102154	0.223702	0.44	0.117259	0.161551	0.184772	0.196062		0.195165	0.113381	0.427769	0.153195	0.44	0.14674	0.170194	0.114926	0.168067		0.0458533	0.100687	0.179986	0.12344	0.44	0.0992991	0.108308	0.100936	0.106045		0.153627	0.13416	0.0985137	0.44	0.0438596	0.0866283	0.0467227
0.162804	0.113588	0.184112	0.164794	0.169915	0.45	0.106247	0.0996627	0.141133	0.0914077	0.152881		0.655506	0.0602997	0.0587731	0.0336226	0.45	0.146574	0.114036	0.123181	0.136391		0.314726	0.179338	0.150395	0.09796	0.45	0.132765	0.0887968	0.165206	0.189076		0.0881406	0.0311286	0.0705075	0.111659	0.45	0.0642523	0.108308	0.0897213	0.0810929		0.13954	0.102354	0.116786	0.45	0.106516	0.0742528	0.0533974
0.126726	0.52084	0.147062	0.158593	0.144055	0.46	0.092081	0.08433	0.08468	0.0914077	0.0643708		0.0898426	0.018828	0.115675	0.133244	0.46	0.124588	0.123539	0.153976	0.127866		0.16685	0.367067	0.129295	0.092135	0.46	0.0978268	0.0813971	0.0861945	0.133053		0.137655	0.065486	0.0769674	0.044463	0.46	0.0642523	0.0445973	0.100936	0.0810929		0.0835073	0.10673	0.192651	0.46	0.056391	0.0495019	0.0734214
0.101752	0.0907931	0.0359407	0.742507	0.278228	0.47	0.0354158	0.0536645	0.0564533	0.0914077	0.0643708		0.0932483	0.0652308	0.102285	0.100893	0.47	0.0586295	0.066521	0.0692894	0.102293		0.124856	0.0564653	0.567967	0.148783	0.47	0.0628887	0.110996	0.122109	0.0910364		0.116271	0.0760247	0.0756251	0.0601213	0.47	0.0584112	0.0509684	0.0953289	0.0935687		0.13241	0.0685381	0.158991	0.47	0.0689223	0.0495019	0.0467227
0.064626	0.244459	0.222914	0.0302036	0.15454	0.48	0.0495821	0.0766636	0.04234	0.0837904	0.104603		0.0576388	0.164229	0.233828	0.217236	0.48	0.102602	0.123539	0.0538918	0.0511465		0.195698	0.223789	0.315106	0.0639245	0.48	0.104814	0.0961965	0.057463	0.0770308		0.178443	0.24032	0.0714325	0.145706	0.48	0.0700935	0.0637105	0.0560758	0.0686171		0.110306	0.0588296	0.500964	0.48	0.0626566	0.0618774	0.0533974
0.047351	0.197912	0.269511	0.11479	0.193294	0.49	0.0849979	0.0459982	0.08468	0.0533211	0.0402317		0.170838	0.0368791	0.0408852	0.164517	0.49	0.0293148	0.038012	0.107784	0.059671		0.15084	0.0889688	0.165441	0.0854291	0.49	0.0209629	0.0147995	0.0790116	0.0910364		0.0717224	0.0482407	0.0202935	0.0171414	0.49	0.0525701	0.0318552	0.0728986	0.0623791		0.137925	0.0919894	0.0371762	0.49	0.0250627	0.0247509	0.0467227
0.111416	0.0946809	0.207932	0.0861709	0.141134	0.5	0.0708316	0.0383318	0.04234	0.0380865	0.0804635		0.157922	0.103401	0.109831	0.296097	0.5	0.0732869	0.114036	0.0769882	0.0426221		0.127272	0.0245179	0.215484	0.0323264	0.5	0.0349382	0.0517981	0.0646459	0.0490196		0.0894276	0.18669	0.170818	0.181631	0.5	0.0525701	0.0382263	0.0448607	0.0374275		0.275073	0.143301	0.0397991	0.5	0.018797	0.0123755	0.0467227
0.145983	0.284558	0.0680604	0.20104	0.0203549	0.51	0.0354158	0.0613309	0.0352833	0.0685558	0.0643708		0.0260698	0.156306	0.245011	0.225903	0.51	0.0806156	0.0760239	0.0461929	0.0852442		0.086905	0.0526763	0.0760588	0.163763	0.51	0.0349382	0.0665976	0.0359144	0.070028		0.121133	0.274164	0.0695014	0.092736	0.51	0.0817757	0.0828236	0.0112152	0.0311896		0.072774	0.0742841	0.0839819	0.51	0.0438596	0.0495019	0.0266987
0.134095	0.158338	0.155873	0.0364036	0.126017	0.52	0.0283326	0.0766636	0.0564533	0.0533211	0.024139		0.178699	0.262433	0.23711	0.185073	0.52	0.0366435	0.047515	0.0384941	0.0767198		0.0968202	0.161701	0.129968	0.227908	0.52	0.0279505	0.0739973	0.0430973	0.0630252		0.0987877	0.0637313	0.215854	0.127915	0.52	0.046729	0.0127421	0.0336455	0.0561412		0.188522	0.0258343	0.154371	0.52	0.0313283	0.0371264	0.0600721
0.0172855	0.0239458	0.353366	0.0269241	0.0941897	0.53	0.0566653	0.0766636	0.0352833	0.0152346	0.0724171		0.116525	0.166932	0.347826	0.0662942	0.53	0.0439722	0.0760239	0.0538918	0.0511465		0.010423	0.244058	0.350376	0.0713792	0.53	0.0559011	0.0591979	0.0790116	0.0420168		0.108747	0.0995789	0.155772	0.08542	0.53	0.0292056	0.0318552	0.0616834	0.0311896		0.0939928	0.0561437	0.0755507	0.53	0.018797	0.0556896	0.0266987
0.0885254	0.192043	0.322747	0.0277611	0.175614	0.54	0.0495821	0.0383318	0.0282267	0.0533211	0.0321854		0.832075	0.134916	0.208758	0.242269	0.54	0.0293148	0.047515	0.0153976	0.0426221		0.0261119	0.0557027	0.457561	0.159262	0.54	0.0349382	0.0591979	0.0502801	0.0560224		0.0375897	0.118166	0.0620677	0.107547	0.54	0.0292056	0.0254842	0.067291	0.0561412		0.468998	0.0917379	0.0826014	0.54	0.0438596	0.0371264	0.0400481
0.050864	0.153785	0.143483	0.0397328	0.100321	0.55	0.0141663	0.0536645	0.0493967	0.0609385	0.0965562		0.0805241	0.0312048	0.142	0.0260212	0.55	0.0366435	0.066521	0.0692894	0.0511465		0.0834091	0.0740125	0.126712	0.0801451	0.55	0.0209629	0.0517981	0.0359144	0.0210084		0.216868	0.0392758	0.329762	0.103906	0.55	0.0350467	0.0318552	0.0392531	0.0374275		0.103518	0.0810824	0.159231	0.55	0.0313283	0.0309387	0.0400481
0.0477337	0.0928224	0.147992	0.0274848	0.230507	0.56	0.0779147	0.0613309	0.02117	0.0380865	0.0482781		0.305992	0.103367	0.348916	0.0892307	0.56	0.0513008	0.047515	0.0461929	0.0511465		0.12423	0.312656	0.224099	0.0820667	0.56	0.0628887	0.0369987	0.0287315	0.0560224		0.159806	0.0518127	0.203646	0.0651656	0.56	0.0350467	0.0191131	0.0224303	0.0187137		0.162339	0.130405	0.059509	0.56	0.018797	0.0185632	0.020024
0.139918	0.0838859	0.225607	0.0272053	0.268982	0.57	0.0637484	0.0306654	0.10585	0.0533211	0.0321854		0.268252	0.294983	0.354123	0.0992208	0.57	0.0439722	0.057018	0.0153976	0.0681954		0.110478	0.402139	0.124625	0.143787	0.57	0.0349382	0.0591979	0.0287315	0.0490196		0.0551703	0.0735208	0.205935	0.103183	0.57	0.0116822	0.0254842	0.0168227	0.0436654		0.185741	0.0625123	0.221071	0.57	0.018797	0.0185632	0.0133494
0.0641937	0.0368516	0.269223	0.0392965	0.0561607	0.58	0.0495821	0.0306654	0.0776233	0.0228519	0.0321854		0.217486	0.183756	0.0978782	0.027333	0.58	0.0293148	0.038012	0.0230965	0.0426221		0.19661	0.188982	0.0892167	0.120801	0.58	0.0489134	0.0295989	0.0215486	0.0210084		0.111718	0.14129	0.0640475	0.0551274	0.58	0.0350467	0.00637105	0.0336455	0.0187137		0.157352	0.140086	0.0662076	0.58	0.018797	0.0123755	0.0333734
0.123993	0.11305	0.0522461	0.0229289	0.0470855	0.59	0.0354158	0.0689972	0.06351	0.0228519	0.0482781		0.0922572	0.260694	0.100986	0.222923	0.59	0.0219861	0.00950299	0.084687	0.0255733		0.145015	0.0799199	0.100681	0.175921	0.59	0.0349382	0.0517981	0.0359144	0.0210084		0.213709	0.326863	0.171573	0.266008	0.59	0.0116822	0.0127421	0.0168227	0.0187137		0.192156	0.222508	0.0857959	0.59	0.0438596	0.0123755	0.00667468
0.0133354	0.155555	0.0945553	0.0304404	0.12797	0.6	0.0424989	0.0459982	0.06351	0.0380865	0.0804635		0.201073	0.240224	0.201245	0.240961	0.6	0.0366435	0.028509	0.0538918	0.0340977		0.336031	0.0636747	0.0796598	0.0239945	0.6	0.0279505	0.0517981	0.0287315	0.0420168		0.145233	0.109274	0.203853	0.226252	0.6	0.0116822	0.0127421	0.0280379	0.0187137		0.0792124	0.036264	0.164618	0.6	0.037594	0.00618774	0.0333734
0.101326	0.0675871	0.0451763	0.0301585	0.0977172	0.61	0.0283326	0.0229991	0.0917366	0.0533211	0.0321854		0.0999194	0.117769	0.218941	0.232693	0.61	0.0586295	0.057018	0.0230965	0.0426221		0.427067	0.144828	0.12264	0.196818	0.61	0.0349382	0.0295989	0.00718288	0.0420168		0.198063	0.254501	0.0925182	0.0488344	0.61	0.0292056	0.0191131	0.0224303	0.0249517		0.172453	0.0860393	0.124488	0.61	0.0250627	0.0185632	0.020024
0.114576	0.0414859	0.129912	0.0370794	0.0561053	0.62	0.0141663	0.0536645	0.04234	0.0457038	0.0643708		0.976856	0.144367	0.243274	0.203476	0.62	0.0586295	0.057018	0.0384941	0.0426221		0.199113	0.0862679	0.217214	0.211571	0.62	0.0559011	0.0665976	0.0646459	0.0210084		0.221881	0.0887375	0.189881	0.231091	0.62	0.0175234	0.0445973	0.0168227	0.0374275		0.312391	0.111858	0.163304	0.62	0.0250627	0.0185632	0.020024
0.246425	0.175579	0.13802	0.0474953	0.143341	0.63	0.0354158	0.0306654	0.0705667	0.0533211	0.0724171		0.318878	0.112897	0.0135599	0.306735	0.63	0.0366435	0.019006	0.0384941	0		0.219522	0.150293	0.174229	0.565315	0.63	0.0279505	0.0295989	0.0359144	0.035014		0.204619	0.063953	0.0702972	0.195413	0.63	0.0350467	0.0254842	0.0112152	0.0187137		0.177326	0.12771	0.0294127	0.63	0.00626566	0.0123755	0.00667468
0.0893916	0.157167	0.130788	0.0328758	0.222572	0.64	0.0354158	0.0766636	0.0493967	0.0304692	0.0643708		0.31462	0.184818	0.0984793	0.155359	0.64	0.0293148	0.019006	0.0461929	0.0681954		0.325297	0.264298	0.12954	0.222424	0.64	0.0209629	0.0443984	0.0359144	0.0140056		0.0569641	0.098035	0.0789675	0.0861844	0.64	0.0233645	0.0191131	0.0168227	0.0374275		0.288231	0.281709	0.0511174	0.64	0.0313283	0.0185632	0.0266987
0.160858	0.107314	0.327469	0.0121791	0.0895885	0.65	0.0283326	0.0306654	0.00705667	0.0228519	0.0402317		0.375252	0.0706207	0.205192	0.173071	0.65	0.095273	0.057018	0.0307953	0.0340977		0.12492	0.0323973	0.270777	0.214409	0.65	0.0279505	0.0295989	0.0215486	0.0280112		0.0678321	0.00066811	0.195905	0.159863	0.65	0.0408879	0.0382263	0.0224303	0.0124758		0.263422	0.15575	0.0843748	0.65	0.018797	0.0185632	0.0266987
0.134756	0.143768	0.21789	0.301374	0.0724898	0.66	0.0354158	0.0459982	0.0282267	0.0914077	0.0563244		0.372477	0.278569	0.215934	0.0564864	0.66	0.0659582	0.028509	0.0538918	0.0340977		0.232394	0.0344205	0.328496	0.139144	0.66	0.0279505	0.0443984	0.0359144	0.035014		0.0931925	0.0697981	0.0996979	0.11255	0.66	0.0350467	0.00637105	0.0112152	0.0249517		0.0630286	0.0826705	0.162787	0.66	0.018797	0.0309387	0.0333734
0.0285524	0.152761	0.100858	0.513947	0.0668384	0.67	0.00708316	0.0383318	0.0282267	0.0152346	0.0321854		0.0659929	0.0909301	0.344943	0.175061	0.67	0.0366435	0.028509	0.0461929	0.0170488		0.304619	0.202741	0.214486	0.143641	0.67	0.0698763	0.0147995	0.0143658	0.0560224		0.0668481	0.218949	0.117909	0.0917177	0.67	0.0233645	0.00637105	0.0392531	0.0374275		0.133128	0.322288	0.204726	0.67	0.0125313	0.0185632	0.00667468
0.227358	0.123247	0.150261	0.954948	0.0401666	0.68	0.0283326	0.0383318	0.06351	0.0228519	0.0402317		0.122171	0.400263	0.203534	0.161868	0.68	0.0366435	0.028509	0.0384941	0.0681954		0.250379	0.290004	0.109116	0.110185	0.68	0.0139753	0.0221992	0.0502801	0.0140056		0.261184	0.237372	0.0911849	0.102972	0.68	0.0408879	0.0191131	0.0224303	0.0124758		0.0129269	0.0698926	0.22331	0.68	0.0125313	0.00618774	0.00667468
0.192662	0.0385373	0.0383848	0.10513	1.0864	0.69	0.0283326	0.0229991	0.0352833	0.0228519	0.0563244		0.0818757	0.0994228	0.310372	0.201672	0.69	0.0366435	0.019006	0.0461929	0.0255733		0.158625	0.233914	0.16528	0.00866514	0.69	0.0139753	0.00739973	0.0430973	0.0140056		0.0655413	0.261424	0.181716	0.14866	0.69	0.0350467	0.0191131	0.0336455	0.0374275		0.055979	0.0493407	0.0756645	0.69	0.037594	0.0123755	0.020024
0.216137	0.161703	0.0357087	0.135684	0.478842	0.7	0.0212495	0.0306654	0.0141133	0.0609385	0.0563244		0.137695	0.0365654	0.10654	0.315151	0.7	0.0366435	0.028509	0.0384941	0.0340977		0.180359	0.0544942	0.267696	0.160993	0.7	0.0279505	0.0443984	0.057463	0.0280112		0.0816339	0.0539726	0.0599956	0.10061	0.7	0.046729	0.0318552	0.0168227	0.0124758		0.066676	0.00789094	0.0980274	0.7	0.0125313	0.0185632	0.020024
0.195386	0.0633852	0.107247	0.225717	0.0284985	0.71	0.0354158	0.0306654	0.0141133	0.0304692	0.0402317		0.135347	0.0606935	0.235308	0.130393	0.71	0.0293148	0.019006	0.0230965	0.0426221		0.0995243	0.0389951	0.271326	0.294926	0.71	0.0279505	0.0295989	0.0359144	0.035014		0.169117	0.230166	0.186265	0.0743003	0.71	0.0233645	0.0191131	0.0112152	0.0124758		0.0767225	0.180373	0.127354	0.71	0.018797	0.0123755	0.0400481
0.178383	0.0228288	0.142057	0.969239	0.207665	0.72	0.0212495	0.00766636	0.0352833	0.0457038	0.0482781		0.774509	0.0839948	0.126868	0.226409	0.72	0.0439722	0.057018	0.0307953	0.0511465		0.228125	0.0302582	0.257018	0.0939001	0.72	0.0279505	0.0443984	0	0.0280112		0.0327561	0.032906	0.120959	0.201693	0.72	0.0233645	0.0127421	0.0112152	0.0374275		0.105031	0.116193	0.0354628	0.72	0.00626566	0.0185632	0
0.124626	0.437624	0.107032	0.100669	0.193832	0.73	0.0283326	0.0459982	0.0352833	0.0304692	0.0321854		0.31243	0.0605143	0.0746738	0.197425	0.73	0.0219861	0.047515	0.0384941	0.00852442		0.0756679	0.24835	0.0829962	0.214669	0.73	0.0419258	0.0517981	0.0287315	0.0490196		0.0330725	0.154315	0.0334827	0.0550199	0.73	0.0292056	0.0191131	0.0168227	0.00623791		0.0153909	0.113983	0.185575	0.73	0.018797	0.00618774	0.00667468
0.187225	0.0843827	0.313267	0.20489	0.135557	0.74	0.0354158	0.0153327	0.02117	0.0152346	0.0643708		0.195593	0.0796672	0.316791	0.183873	0.74	0.0293148	0.047515	0.0230965	0.0170488		0.119546	0.167583	0.00829583	0.0588999	0.74	0.0139753	0.0147995	0.0430973	0.0560224		0.101947	0.157705	0.124249	0.0531406	0.74	0.0233645	0.0191131	0.0168227	0.0187137		0.112282	0.179763	0.115392	0.74	0.0125313	0.0247509	0.00667468
0.271519	0.158933	0.0988878	0.187118	0.0950307	0.75	0.0283326	0	0.02117	0.0380865	0.0321854		0.0469193	0.0708939	0.169593	0.153704	0.75	0.0439722	0.038012	0.0384941	0.0426221		0.364093	0.17632	0.0876463	0.251011	0.75	0.0279505	0.0221992	0.0215486	0.0140056		0.0668822	0.047313	0.285503	0.141099	0.75	0.00584112	0.0254842	0.0168227	0.0249517		0.138793	0.240683	0.139906	0.75	0.00626566	0.0185632	0.0133494
0.259488	0.094218	0.213505	0.327197	0.0642417	0.76	0.0283326	0.0306654	0.00705667	0.0533211	0.0160927		0.0328274	0.0930971	0.106947	0.13005	0.76	0.0219861	0.066521	0.0615906	0.0170488		0.0875071	0.256387	0.0516053	0.150481	0.76	0.0139753	0.0295989	0.0143658	0.035014		0.239348	0.200611	0.236311	0.0600229	0.76	0.0292056	0.0382263	0.0112152	0.0124758		0.0246857	0.190881	0.0954867	0.76	0.0125313	0.0433142	0.0333734
0.113711	0.153176	0.101255	0.175232	0.304987	0.77	0.0283326	0.0536645	0.0564533	0.0457038	0.00804635		0.196245	0.361176	0.178094	0.380639	0.77	0.0879443	0.019006	0.00769882	0.0340977		0.221879	0.210398	0.104279	0.172917	0.77	0.0349382	0.0147995	0.0287315	0.035014		0.0841397	0.0453867	0.259127	0.124629	0.77	0.0292056	0.00637105	0.0224303	0.0311896		0.172327	0.16818	0.174263	0.77	0	0.0309387	0.0333734
0.104746	0.120645	0.171227	0.403368	0.192975	0.78	0.0212495	0.0153327	0.0352833	0.0533211	0.0482781		0.112836	0.406816	0.0709949	0.296584	0.78	0.0219861	0.00950299	0.0384941	0.0511465		0.0574735	0.140241	0.0694822	0.279977	0.78	0.0628887	0.0369987	0.0287315	0.0210084		0.170494	0.0249235	0.0848748	0.173782	0.78	0.0175234	0.0127421	0.00560758	0.0187137		0.0799489	0.222599	0.0829676	0.78	0.018797	0.00618774	0.0400481
0.144961	0.129758	0.138863	0.216911	0.0903266	0.79	0.0141663	0.0383318	0.02117	0.0609385	0.0563244		0.223991	0.156825	0.101575	0.114247	0.79	0.0806156	0.00950299	0.0153976	0.0426221		0.370045	0.0625873	0.0251252	0.089422	0.79	0.0489134	0.0443984	0.0287315	0.035014		0.121942	0.0877559	0.0710508	0.0506772	0.79	0.00584112	0.0127421	0.0280379	0.0187137		0.0723877	0.281184	0.124641	0.79	0	0.0371264	0.00667468
0.12285	0.208568	0.0228366	0.822545	0.241953	0.8	0.0212495	0.0229991	0.00705667	0.0380865	0.0160927		0.176401	0.131699	0.0911105	0.264231	0.8	0.0293148	0.00950299	0.0538918	0.0170488		0.207151	0.135447	0.0442792	0.209545	0.8	0.0489134	0.0147995	0.0287315	0.0560224		0.129609	0.160533	0.172455	0.282429	0.8	0.0292056	0.0254842	0.0112152	0.00623791		0.0648282	0.0886148	0.0506058	0.8	0.0313283	0.0433142	0
0.362094	0.0964142	0.189894	0.318412	0.0332177	0.81	0.0424989	0.0306654	0.0352833	0.0533211	0.0160927		0.224623	0.206842	0.0911553	0.062248	0.81	0.0293148	0.028509	0.0461929	0.0340977		0.357189	0.184722	0.052772	0.305124	0.81	0.0349382	0.0221992	0.0287315	0		0.120297	0.0958843	0.0470693	0.0445076	0.81	0.0116822	0.0127421	0.00560758	0.00623791		0.297317	0.151287	0.0352761	0.81	0.0125313	0.0123755	0.00667468
0.265876	0.0212735	0.404669	0.25888	0.0963114	0.82	0.0495821	0.0229991	0.04234	0.0609385	0.0160927		0.315561	0.0610588	0.599909	0.0773743	0.82	0.0293148	0.028509	0.0461929	0.0170488		0.264748	0.107498	0.0585065	0.0129733	0.82	0.00698763	0.0147995	0.0359144	0.0280112		0.187725	0.148703	0.0640846	0.0821754	0.82	0.0175234	0.00637105	0.0168227	0.00623791		0.158583	0.0552093	0.0839818	0.82	0	0.0185632	0.0400481
0.106512	0.214336	0.162769	0.0772342	0.187914	0.83	0.00708316	0.0383318	0.0282267	0.0228519	0.0402317		0.1245	0.0757874	0.14197	0.199852	0.83	0.0146574	0.00950299	0.0153976	0.00852442		0.0546793	0.232113	0.518001	0.0516833	0.83	0.0279505	0.0221992	0.00718288	0.0070028		0.247414	0.140815	0.194263	0.0130711	0.83	0.0408879	0.00637105	0.0224303	0.0187137		0.0444884	0.0800551	0.12076	0.83	0.0125313	0.0309387	0.0266987
0.0697116	0.0713604	0.321297	0.0136817	0.173359	0.84	0.0283326	0.0229991	0.0352833	0.0533211	0.024139		0.452016	0.194153	0.617957	0.281805	0.84	0.0219861	0.038012	0.0384941	0.0340977		0.121189	0.115406	0.147247	0.351787	0.84	0.0349382	0.0295989	0.0215486	0.035014		0.287744	0.318164	0.0655479	0.136191	0.84	0.0116822	0	0.0112152	0.0124758		0.295864	0.135052	0.0666981	0.84	0.0313283	0.0185632	0.00667468
0.116374	0.122489	0.185714	0.0298321	0.188764	0.85	0.0212495	0.0229991	0.0141133	0.0380865	0.0482781		0.420353	0.052636	0.145939	0.353822	0.85	0.0366435	0.028509	0.0615906	0.0255733		0.190514	0.172142	0.151177	0.183312	0.85	0.0279505	0.0147995	0.0143658	0.0280112		0.179248	0.354818	0.124123	0.0944529	0.85	0.0175234	0	0.0168227	0.0187137		0.143083	0.264663	0.0901065	0.85	0.018797	0.0123755	0.0133494
0.0592425	0.00797525	0.0704464	0.172077	0.128279	0.86	0.0354158	0.0459982	0.0282267	0.0685558	0.0402317		0.0621311	0.0630552	0.125679	0.095138	0.86	0.0146574	0.019006	0.0384941	0.0426221		0.0503876	0.186795	0.190695	0.216089	0.86	0.0209629	0.0147995	0.0359144	0.035014		0.0152198	0.0667404	0.298953	0.0560829	0.86	0.0233645	0.0191131	0.0112152	0.0187137		0.105251	0.0684609	0.13439	0.86	0.0125313	0	0.0133494
0.119644	0.0685886	0.437369	0.0507769	0.190305	0.87	0.0495821	0.0536645	0.04234	0.0304692	0.0563244		0.0515508	0.114885	0.32728	0.124342	0.87	0.0439722	0.028509	0.0307953	0.00852442		0.350711	0.241935	0.0692023	0.133866	0.87	0.0349382	0.0517981	0.0143658	0.035014		0.0501862	0.256891	0.0727033	0.355558	0.87	0.0175234	0.0254842	0.0112152	0.0187137		0.162285	0.163036	0.0856613	0.87	0.018797	0	0.00667468
0.124346	0.154161	0.190144	0.0486028	0.105297	0.88	0.0354158	0.00766636	0.0141133	0.0228519	0.0160927		0.116564	0.212117	0.24448	0.0720821	0.88	0	0	0.0461929	0.0340977		0.227577	0.304573	0.224036	0.0874404	0.88	0.0139753	0.0295989	0.00718288	0.035014		0.143201	0.224628	0.192793	0.119939	0.88	0.0175234	0	0.0168227	0.0311896		0.182664	0.134175	0.251923	0.88	0.0250627	0.00618774	0.0333734
0.121034	0.0820764	0.340309	0.0864072	0.146591	0.89	0.0495821	0.0459982	0.0352833	0.0380865	0.024139		0.268023	0.0963511	0.173061	0.247392	0.89	0.0513008	0.038012	0.107784	0.059671		0.266515	0.174925	0.0965179	0.208572	0.89	0.0209629	0.00739973	0.00718288	0.0210084		0.0422689	0.180026	0.141362	0.0672798	0.89	0.0116822	0.0191131	0.0224303	0.0311896		0.0872311	0.0373646	0.0377733	0.89	0.0125313	0.00618774	0.020024
0.195816	0.0852175	0.0681147	0.0783425	0.205025	0.9	0.0637484	0.0229991	0.02117	0.0685558	0.0321854		0.227397	0.144838	0.193409	0.0259368	0.9	0.0439722	0.047515	0.0153976	0.0170488		0.15888	0.0397182	0.225511	0.11256	0.9	0.0139753	0.0295989	0.0215486	0.0210084		0.113016	0.178723	0.272428	0.100029	0.9	0.00584112	0.0318552	0.0224303	0.0249517		0.300948	0.185687	0.146611	0.9	0.0125313	0.00618774	0.00667468
0.0983147	0.183733	0.146153	0.135581	0.312746	0.91	0.0283326	0.0919963	0.02117	0.0457038	0.0482781		0.250355	0.171341	0.0835073	0.132395	0.91	0.0219861	0.0760239	0.0153976	0.0340977		0.0726501	0.0974279	0.0392466	0.0555207	0.91	0.0279505	0.0295989	0.0143658	0.0210084		0.312202	0.0532735	0.194423	0.297295	0.91	0.0233645	0.0191131	0.0280379	0.0187137		0.120997	0.0912948	0.166356	0.91	0.018797	0.00618774	0.0600721
0.249007	0.6555	0.263606	0.201101	0.136573	0.92	0.0495821	0.0613309	0.02117	0.0228519	0.0643708		0.593297	0.161164	0.0611251	0.262708	0.92	0.0366435	0.028509	0.0461929	0.0255733		0.137194	0.211887	0.15381	0.0115076	0.92	0.0209629	0.0221992	0.057463	0.0420168		0.0275293	0.209131	0.320117	0.132612	0.92	0.00584112	0.0127421	0.0280379	0.0124758		0.0194788	0.0716289	0.130536	0.92	0	0.0247509	0.0400481
0.211728	0.542705	0.350061	0.172004	0.353668	0.93	0.0141663	0.0306654	0.0282267	0	0.0321854		0.0151892	0.239533	0.148846	0.134622	0.93	0.0293148	0.019006	0.0538918	0.0511465		0.101705	0.0407071	0.0689603	0.119969	0.93	0.0349382	0.0369987	0.0143658	0.0210084		0.282045	0.0822844	0.0446176	0.0705349	0.93	0.0116822	0.0318552	0.00560758	0.0187137		0.0850506	0.0979063	0.180116	0.93	0.0125313	0.00618774	0.0133494
0.287977	0.0408324	0.124071	0.25975	0.0948933	0.94	0.0283326	0.0383318	0.0493967	0.0457038	0.0160927		0.359587	0.250657	0.233898	0.0685433	0.94	0.0366435	0.028509	0.0230965	0.0426221		0.396682	0.0239235	0.0654658	0.162311	0.94	0	0.0295989	0.057463	0.035014		0.142388	0.742266	0.055673	0.0118758	0.94	0.0116822	0.0127421	0.0280379	0.0249517		0.0903149	0.0859783	0.14883	0.94	0.0125313	0.0123755	0.0133494
0.071582	0.275988	0.066957	0.193332	0.274035	0.95	0.0212495	0.0229991	0.0282267	0.0457038	0.00804635		0.423595	0.360446	0.137966	0.0456859	0.95	0.0219861	0.00950299	0.0230965	0.0340977		0.137186	0.222219	0.111924	0.38183	0.95	0.0139753	0.0295989	0.0430973	0.0140056		0.0833554	0.286983	0.0312894	0.267675	0.95	0.0408879	0.0254842	0.0168227	0.00623791		0.210248	0.497727	0.0765422	0.95	0	0.00618774	0.020024
0.0921746	0.106775	0.115144	0.0813517	0.133229	0.96	0.0141663	0.0383318	0.02117	0.0152346	0.024139		0.782339	0.0525411	0.0967433	0.101724	0.96	0.00732869	0.019006	0.0153976	0.0255733		0.108952	0.0618394	0.060054	0.216964	0.96	0.0209629	0.00739973	0.0215486	0.0280112		0.0958478	0.225564	0.253063	0.13211	0.96	0	0.0254842	0.00560758	0		0.187142	0.328765	0.095395	0.96	0.018797	0.00618774	0.00667468
0.271229	0.166222	0.144831	0.0247931	0.53733	0.97	0.0141663	0.0229991	0.0352833	0.0380865	0.0321854		0.0876367	0.204044	0.0929569	0.0973413	0.97	0.0293148	0.057018	0.0384941	0.0170488		0.0540218	0.0719924	0.138136	0.169643	0.97	0.0349382	0.0221992	0.0143658	0.0140056		0.125316	0.0875233	0.207805	0.179788	0.97	0.0233645	0.0382263	0.0168227	0.0374275		0.269663	0.0929593	0.122907	0.97	0.00626566	0.0123755	0.020024
0.0992273	0.187496	0.0636709	0.710247	0.158378	0.98	0.0354158	0.0229991	0.0282267	0.0457038	0.0160927		0.74174	0.0479805	0.28901	0.102587	0.98	0.0513008	0.00950299	0.0153976	0.059671		0.0500155	0.827235	0.0601449	0.098884	0.98	0.0628887	0.0295989	0.0143658	0.0210084		0.220614	0.0931866	0.100151	0.110651	0.98	0	0.00637105	0.0224303	0.0124758		0.117531	0.165911	0.0656511	0.98	0.00626566	0.0123755	0.0133494
0.127783	0.144235	0.179331	0.0560015	0.148293	0.99	0.0212495	0.0306654	0.0282267	0.0533211	0.0321854		0.0564507	0.0597748	0.210994	0.353654	0.99	0.00732869	0.047515	0.0384941	0.0511465		0.0534746	0.461321	0.283774	0.159162	0.99	0.0349382	0.0369987	0.0287315	0.0280112		0.154275	0.186496	0.0749271	0.350627	0.99	0.0233645	0.0254842	0.0168227	0.0187137		0.0965932	0.139015	0.292937	0.99	0.0250627	0	0.0133494
0.0455395	0.197492	0.222627	0.113635	0.0100376	1	0.0212495	0.0383318	0.0282267	0.0304692	0.024139		0.10425	0.137453	0.143282	0.156016	1	0.00732869	0.028509	0.0461929	0.0170488		0.12508	0.240631	0.215098	0.0370973	1	0	0.00739973	0.00718288	0.0140056		0.200205	0.0505884	0.113376	0.236282	1	0.0175234	0.00637105	0.0168227	0.0374275		0.0548429	0.417479	0.0601608	1	0.018797	0.0185632	0.020024
0.116994	0.056642	0.144396	0.231741	0.127169	1.01	0.0212495	0.0306654	0.0141133	0.0152346	0.0321854		0.0809047	0.177501	0.0808201	0.130809	1.01	0.00732869	0.00950299	0.00769882	0.0340977		0.141694	0.255114	0.0586848	0.110788	1.01	0.0279505	0.0295989	0.00718288	0.0280112		0.121019	0.130712	0.201331	0.275054	1.01	0.0175234	0.0191131	0.0224303	0.0311896		0.0644211	0.0860001	0.146039	1.01	0.0125313	0.0185632	0.00667468
0.0457932	0.222298	0.0295355	0.124055	0.045176	1.02	0.0637484	0.0459982	0.0141133	0.0228519	0.0643708		0.0184443	0.16562	0.131553	0.238125	1.02	0.0366435	0.0855269	0.0153976	0.0170488		0.0336336	0.0420188	0.240751	0.216342	1.02	0.0139753	0.0221992	0.0215486	0.0140056		0.0938409	0.122622	0.160199	0.169428	1.02	0.0116822	0.0191131	0	0.0187137		0.157217	0.136312	0.21082	1.02	0.0125313	0.0247509	0
0.156353	0.242631	0.10919	0.201032	0.14957	1.03	0.0212495	0.0383318	0.0282267	0.0228519	0.0160927		0.0980115	0.220439	0.249529	0.180982	1.03	0.0293148	0.028509	0.00769882	0.0170488		0.386592	0.187404	0.265357	0.444008	1.03	0.0349382	0.0295989	0.0215486	0.0280112		0.220972	0.218613	0.243088	0.117409	1.03	0.0233645	0.0127421	0.0448607	0.0249517		0.112521	0.232058	0.205601	1.03	0.0125313	0.00618774	0.0133494
0.165521	0.236969	0.144795	0.0757543	0.0576968	1.04	0.0424989	0.0306654	0.06351	0.0152346	0.024139		0.048603	0.132213	0.174915	0.0668457	1.04	0.00732869	0.00950299	0.0307953	0.0255733		0.228346	0.142045	0.182327	0.381874	1.04	0.0209629	0.0221992	0.0143658	0.0140056		0.116326	0.0264047	0.178711	0.134108	1.04	0.00584112	0.0382263	0.0280379	0.0249517		0.213286	0.31764	0.302965	1.04	0	0.0309387	0.020024
0.16327	0.0923199	0.128147	0.322945	0.146011	1.05	0.0141663	0.0459982	0.0282267	0.0457038	0.0482781		0.0673989	0.0798612	0.0782953	0.428586	1.05	0.0146574	0.00950299	0.00769882	0.00852442		0.178277	0.104537	0.0947544	0.168719	1.05	0.0279505	0	0.0287315	0.0420168		0.112076	0.0162596	0.141474	0.0995251	1.05	0.00584112	0.0254842	0.0280379	0.00623791		0.166688	0.101711	0.0845526	1.05	0.018797	0	0.0133494
0.107446	0.143392	0.0256868	0.235559	0.100949	1.06	0.0283326	0.0153327	0.0352833	0.0380865	0.0482781		0.0401374	0.075289	0.0595723	0.06767	1.06	0.0146574	0.0760239	0.00769882	0.0511465		0.0688059	0.0321633	0.10002	0.205222	1.06	0.0139753	0.0443984	0.0143658	0.0210084		0.166581	0.246134	0.0815893	0.140448	1.06	0.00584112	0.0254842	0.0168227	0.0187137		0.0807789	0.146344	0.0328047	1.06	0.018797	0.0185632	0.020024
0.151465	0.0239684	0.273374	0.0840768	0.140429	1.07	0.0566653	0.0536645	0.0282267	0.0533211	0.0160927		0.0817814	0.241292	0.072826	0.134197	1.07	0	0.00950299	0.0230965	0.0426221		0.116364	0.172972	0.127913	0.105253	1.07	0.0139753	0.0665976	0.00718288	0.035014		0.0722944	0.0541421	0.0962859	0.0926033	1.07	0.0292056	0.0191131	0.0336455	0.0187137		0.027631	0.143611	0.12949	1.07	0.0125313	0.00618774	0.0266987
0.132447	0.0487857	0.136675	0.158762	0.174043	1.08	0.0212495	0.0153327	0.02117	0.0228519	0.0482781		0.0682973	0.219515	0.110306	0.192789	1.08	0.0439722	0.019006	0.0230965	0.0170488		0.0449658	0.072746	0.102002	0.2776	1.08	0.0139753	0.00739973	0.0215486	0.0140056		0.249466	0.104454	0.195911	0.224923	1.08	0.0116822	0.0254842	0.0336455	0.0187137		0.105172	0.167008	0.201748	1.08	0.018797	0.0371264	0.00667468
0.047199	0.108069	0.150007	0.0836302	0.0970869	1.09	0.0212495	0.0153327	0.04234	0.0457038	0.0321854		0.146394	0.153162	0.259198	0.386963	1.09	0.0293148	0.028509	0.0230965	0.0340977		0.0698456	0.187251	0.0256307	0.1898	1.09	0.00698763	0.0147995	0.057463	0.0070028		0.140507	0.10523	0.0781184	0.109389	1.09	0.0233645	0.00637105	0.0112152	0.0311896		0.065922	0.109991	0.014966	1.09	0.018797	0.0247509	0.0133494
0.0609388	0.137757	0.081159	0.329764	0.214388	1.1	0.0354158	0.00766636	0.0141133	0.00761731	0.024139		0.241854	0.207435	0.250412	0.0568691	1.1	0.0219861	0.019006	0.0230965	0.00852442		0.140952	0.0596374	0.0475277	0.157632	1.1	0.00698763	0	0	0.0280112		0.309476	0.00612427	0.171706	0.0492957	1.1	0.00584112	0	0.0112152	0.0187137		0.182405	0.0581779	0.233622	1.1	0.00626566	0.00618774	0.00667468
0.0785285	0.0686159	0.192787	0.33044	0.171767								0.197617	0.169576	0.11344	0.857106							0.302621	0.0095992	0.122997	0.271925							0.0520048	0.0949242	0.231331	0.21281							0.101505	0.045867	0.251193
0.172539	0.200695	0.167033	0.190582	0.654465								0.163505	0.178771	0.0243119	0.112851							0.0893476	0.287346	0.321201	0.160299							0.271343	0.135874	0.197341	0.0923801							0.162075	0.0557603	0.214872
0.123078	0.203611	0.0702241	0.141731	0.327355								0.281499	0.0428935	0.0452905	0.0838765							0.0443095	0.033344	0.075638	0.140332							0.284169	0.0589379	0.112951	0.204313							0.0492593	0.0594951	0.0914876
0.188921	0.290956	0.0931718	0.158092	0.174527								0.242678	0.204743	0.0938789	0.138337							0.084395	0.0681883	0.132181	0.127901							0.0660262	0.112994	0.291667	0.0731167							0.0544685	0.0621087	0.0469495
0.0985775	0.141702	0.144466	0.171083	0.124176								0.177609	0.0922845	0.0747503	0.0614898							0.188601	0.0345894	0.0911144	0.199206							0.0674602	0.0449953	0.136186	0.082437							0.0507914	0.138663	0.0743969
0.18892	0.13158	0.160671	0.174146	0.0244997								0.0168691	0.0491952	0.120047	0.155131							0.168398	0.065886	0.0447932	0.179953							0.193865	0.0709583	0.214163	0.226893							0.0769776	0.080967	0.0448924
0.15583	0.0332152	0.173839	0.22035	0.272407								0.0874838	0.143759	0.304124	0.190462							0.301888	0.100666	0.0855546	0.125787							0.100784	0.0426886	0.0651196	0.166411							0.0318978	0.104375	0.126168
0.202671	0.175191	0.200205	0.109169	0.0492011								0.158055	0.131793	0.180206	0.112449							0.0519216	0.120047	0.0181502	0.0448523							0.0456618	0.069025	0.137093	0.257751							0.0771105	0.112996	0.067744
0.0288914	0.122214	0.129382	0.231707	0.254063								0.182415	0.237325	0.05283	0.251961							0.150896	0.277254	0.0284063	0.117863							0.0587028	0.225864	0.040222	0.121521							0.0420292	0.0759401	0.145448
0.215199	0.202189	0.990904	0.218035	0.255798								0.141042	0.16411	0.0233129	0.618003							0.0788385	0.023439	0.0582238	0.0665706							0.0596187	0.148624	0.0229008	0.10723							0.0981649	0.0190839	0.0899691
0.166342	0.160566	0.0553014	0.0289174	0.164315								0.149177	0.0846186	0.22887	0.150973							0.0815704	0.114602	0.167856	0.196961							0.256237	0.0982207	0.139004	0.16687							0.126672	0.372781	0.100989
0.029921	0.107943	0.317582	0.27721	0.191902								0.282375	0.15633	0.2806	0.236591							0.166408	0.190364	0.112964	0.280286							0.207308	0.109314	0.107361	0.153991							0.32024	0.181485	0.0687344
0.0717757	0.164095	0.12745	0.0351738	0.259845								0.0324312	0.116486	0.314945	0.184764							0.118017	0.283313	0.162952	0.114455							0.0418047	0.091238	0.183869	0.271412							0.146545	0.194349	0.0199116
0.131313	0.164671	0.125434	0.133197	0.08952								0.129406	0.0610115	0.207584	0.444072							0.145609	0.0854407	0.0563715	0.0962387							0.116071	0.0971012	0.0537612	0.582139							0.0476858	0.107416	0.124352
0.328276	0.110215	0.186837	0.130328	0.846044								0.195206	0.124097	0.157936	0.0866069							0.116738	0.118638	0.102169	0.122042							0.0256059	0.0824632	0.0852162	0.281195							0.0177495	0.056016	0.0670216
0.195573	0.21003	0.107308	0.113648	0.236473								0.124959	0.0312414	0.281146	0.0557636							0.0255082	0.0287818	0.247701	0.104717							0.10257	0.0455458	0.132925	0.0844885							0.0758642	0.177116	0.113844
0.214389	0.23457	0.104802	0.128538	0.107056								0.142237	0.0639762	0.120942	0.0611065							0.0760796	0.0607109	0.162898	0.305865							0.209801	0.168296	0.172448	0.0753375							0.164948	0.0811429	0.0300869
0.383955	0.247165	0.145401	0.380155	0.09105								0.119041	0.0751584	0.209302	0.11537							0.216837	0.0171228	0.0557175	0.0784615							0.111326	0.106309	0.0598031	0.139479							0.0296584	0.171234	0.105753
0.349494	0.184765	0.307394	0.0814008	0.12039								0.17847	0.319916	0.147228	0.229122							0.165585	0.0258429	0.162439	0.046802							0.0279213	0.185557	0.11008	0.0178197							0.135733	0.0721005	0.0775971
0.258464	0.0528692	0.155343	0.0704207	0.193584								0.219386	0.108195	0.0676647	0.249504							0.134772	0.146623	0.129251	0.132084							0.165047	0.0834594	0.07834	0.153972							0.135349	0.035383	0.220961
0.0384589	0.301047	0.221138	0.124162	0.101161								0.178899	0.114127	0.293657	0.0714246							0.0491676	0.0455658	0.0866338	0.090775							0.310119	0.0578796	0.0915333	0.206715							0.116661	0.0493176	0.186219
0.0712141	0.0727736	0.194785	0.0619415	0.0481364								0.0939521	0.00775307	0.144666	0.231304							0.213522	0.0492809	0.0519724	0.168551							0.128183	0.261335	0.0775487	0.0287406							0.0906018	0.15058	0.143121
0.151627	0.302358	0.012518	0.234651	0.068371								0.0371866	0.0354385	0.194057	0.073685							0.141881	0.275231	0.155008	0.139298							0.699667	0.40348	0.106667	0.0538656							0.0410784	0.0880882	0.122479
0.0421036	0.0308142	0.0847654	0.275612	0.256042								0.112272	0.126103	0.189783	0.12377							0.213655	0.0566885	0.020596	0.281573							0.0445925	0.135409	0.0595983	0.10172							0.0487027	0.100841	0.304909
0.14976	0.257996	0.228767	0.153191	0.165408								0.177796	0.154763	0.319414	0.109054							0.341359	0.00887448	0.0770955	0.314265							0.0873088	0.108147	0.178426	0.0750939							0.166813	0.259055	0.210894
0.124676	0.173028	0.014	0.136644	0.188757								0.046247	0.179969	0.0855958	0.216039							0.0597939	0.123034	0.17208	0.213							0.119921	0.145769	0.0948552	0.237968							0.0179982	0.589042	0.0813466
0.107592	0.0869873	0.096094	0.0111535	0.160904								0.191172	0.122746	0.233142	0.147362							0.23109	0.0778017	0.0868611	0.263463							0.0778597	0.236943	0.0940517	0.161717							0.0483489	0.117007	0.0445473
0.162064	0.249543	0.145167	0.118125	0.127181								0.228586	0.11199	0.1313	0.123657							0.0640432	0.0613817	0.0895528	0.335736							0.227404	0.189649	0.139103	0.0300278							0.292961	0.0492971	0.131997
0.177814	0.252596	0.085348	0.0788713	0.0523476								0.349534	0.0944219	0.930329	0.422255							0.161659	0.0757715	0.12812	0.0529565							0.126908	0.142932	0.138184	0.0596459							0.329702	0.184996	0.0570469
0.119929	0.0520353	0.203404	0.0542429	0.0523274								0.156782	0.113872	1.03747	0.136285							0.059542	0.251792	0.165207	0.117322							0.0504603	0.23692	0.340577	0.510011							0.120985	0.199014	0.189143
0.130563	0.07665	0.141413	0.141133	0.160907								0.164246	0.264076	0.153037	0.0696353							0.0341317	0.28152	0.0719956	0.0313925							0.248375	0.140058	0.134783	0.190726							0.056522	0.0682835	0.170429
0.0801874	0.225523	0.0934186	0.230494	0.374874								0.0921575	0.0799742	0.127787	0.0998702							0.360191	0.29614	0.0234209	0.0391121							0.054402	0.283126	0.104195	0.0455932							0.110011	0.0520607	0.271999
0.123233	0.286285	0.210187	0.888131	0.0936534								0.799538	0.188493	0.282388	0.117244							0.0450807	0.13463	0.235498	0.169459							0.0737077	0.0518044	0.0272834	0.0718128							0.100939	0.0398345	0.0543941
0.171935	0.136905	0.190778	0.0357785	0.217033								0.19907	0.0838487	0.149843	0.0788328							0.102924	0.126496	0.155231	0.162232							0.151594	0.0882912	0.147475	0.207188							0.105716	0.0475882	0.0503303
0.192993	0.305921	0.0117255	0.610515	0.185462								0.14141	0.107834	0.348633	0.219592							0.114871	0.272531	0.208817	0.0948939							0.0983098	0.0758724	0.220511	0.124053							0.176283	0.0631653	0.23608
0.254158	0.0354063	0.0910911	0.221525	0.0345192								0.114462	0.0550148	0.0975895	0.39632							0.113446	0.313202	0.172761	0.214375							0.0250636	0.0855943	0.249335	0.110125							0.0891998	0.0396849	0.226428
0.0795519	0.201624	0.119133	0.156621	0.0530242								0.107536	0.145989	0.271551	0.262271							0.29811	0.214929	0.205517	0.310386							0.115948	0.257455	0.0817275	0.205585							0.182865	0.0775826	0.0623413
0.104024	0.200597	0.313236	0.0719848	0.237724								0.0252563	0.137049	0.142327	0.161628							0.0637407	0.0541621	0.137125	0.297275							0.057916	0.21518	0.0685939	0.0929952							0.0398008	0.0959648	0.158578
0.219058	0.167318	0.160308	0.196332	0.235958								0.374943	0.155999	0.118882	0.240912							0.235278	0.024493	0.265966	0.122522							0.15464	0.0604119	0.100635	0.0946908							0.125196	0.266093	0.00994816
0.130619	0.0634956	0.0392003	0.110134	0.123608								0.198855	0.106279	0.0596766	0.117058							0.0979037	0.214258	0.173671	0.0817858							0.0682978	0.0454475	0.199395	0.0200746							0.115952	0.171469	0.349254
0.204486	0.0563527	0.613337	0.0234426	0.0862315								0.125783	0.259997	0.138395	0.120671							0.0338378	0.25985	0.285127	0.140666							0.161167	0.0797656	0.069379	0.107445							0.10614	0.162488	0.135936
0.307618	0.22918	0.310656	0.120505	0.2432								0.234495	0.431041	0.179746	0.163043							0.0569576	0.199956	0.16145	0.141378							0.0371848	0.0820573	0.139118	0.157752							0.211124	0.0257888	0.0684201
0.0998044	0.0234132	0.15162	0.187519	0.506809								0.157796	0.0690431	0.0820177	0.109987							0.126221	0.104235	0.446656	0.0982766							0.028927	0.0986869	0.0537107	0.196981							0.056337	0.0674491	0.0900397
0.213677	0.229494	0.138356	0.155326	0.152499								0.210186	0.20836	0.337528	0.129148							0.187388	0.0495433	0.642424	0.0293926							0.252899	0.0858434	0.0557064	0.0366046							0.0952211	0.0438659	0.129777
0.234789	0.0906387	0.188329	0.0924331	0.269539								0.046316	0.140143	0.145972	0.807584							0.13535	0.199681	0.0539624	0.044129							0.204761	0.115048	0.0738099	0.112933							0.0553404	0.00282288	0.0509368
0.134763	0.243568	0.264204	0.197358	0.109888								0.333106	0.256708	0.132365	0.219884							0.167895	0.158985	0.0873573	0.23993							0.0611489	0.144817	0.0415044	0.0722085							0.0473818	0.071425	0.115515
0.0758995	0.238584	0.0155515	0.0693413	0.446524								0.159556	0.173806	0.168713	0.0982465							0.10076	0.209754	0.337531	0.165865							0.0814812	0.0910272	0.104247	0.0343031							0.122278	0.0650882	0.292846
0.0556736	0.0862803	0.10094	0.0750215	0.19315								0.091357	0.260226	0.104519	0.0732888							0.334461	0.122132	0.271023	0.199908							0.102145	0.227401	0.0705653	0.308021							0.13747	0.0607689	0.0474376
0.0374033	0.200863	0.157654	0.119941	0.156569								0.0542438	0.0912733	0.199414	0.210175							0.112907	0.154497	0.209451	0.154369							0.0468462	0.113467	0.103201	0.0880333							0.0593534	0.0741278	0.145309
0.273514	0.12373	0.275908	0.0437617	0.662903								0.124209	0.185231	0.0984442	0.100772							0.165036	0.0841805	0.214986	0.138087							0.130963	0.110494	0.064811	0.0562977							0.307072	0.2332	0.147702
0.0769402	0.125492	0.238329	0.141514	0.0586781								0.043816	0.291372	0.152542	0.120273							0.239071	0.12546	0.186059	0.16136							0.0905382	0.118709	0.214503	0.344418							0.0458248	0.242581	0.091635
0.292654	0.217876	0.122308	0.381377	0.141439								0.105079	0.253375	0.265661	0.229222							0.813971	0.125984	0.174703	0.365629							0.0888367	0.0866096	0.134105	0.148829							0.0683554	0.14119	0.0414088
0.0626381	0.330593	0.231293	0.189831	0.214513								0.0159223	0.183201	0.197876	0.0396548							0.275677	0.217739	0.192203	0.0834675							0.0732103	0.0816986	0.167383	0.121433							0.0521986	0.231261	0.181822
0.164348	0.217031	0.128341	0.216905	0.071708								0.0716627	0.155845	0.241507	0.0738194							0.105148	0.0988203	0.0879839	0.0217776							0.0246059	0.0751783	0.320995	0.722748							0.187624	0.1391	0.0651003
0.196382	0.325159	0.142519	0.0324745	0.0982537								0.0955573	0.155681	0.168506	0.0337976							0.066568	0.0306451	0.0933428	0.155884							0.47347	0.133948	0.154557	0.226571							0.0818661	0.23356	0.542331
0.104889	0.164063	0.0437578	0.237098	0.0420388								0.132772	0.145512	0.125745	0.178625							0.0578171	0.325281	0.187108	0.107231							0.209883	0.159109	0.0589069	0.064645							0.0313105	0.172548	0.166299
0.192797	0.267472	0.151327	0.213463	1.03044								0.0832585	0.279909	0.0870203	0.0301784							0.0484036	0.245702	0.0678456	0.137657							0.0567714	0.110523	0.140258	0.103715							0.0207224	0.0301302	0.112069
0.119249	0.164101	0.195897	0.778134	0.190775								0.130209	0.128111	0.1426	0.136263							0.131115	0.157481	0.0754305	0.124039							0.122349	0.163806	0.0972435	0.0235415							0.0536288	0.124156	0.291051
0.0202841	0.161085	0.371342	0.149604	0.317404								0.407085	0.1753	0.118645	0.153521							0.264713	0.213591	0.0366173	0.207672							0.0435917	0.0654008	0.063231	0.0904381							0.238614	0.0918995	0.188794
0.172447	0.127081	0.183208	0.212561	0.138308								0.209899	0.069371	0.0405818	0.143757							0.129615	0.141108	0.137177	0.0360315							0.0076072	0.0602024	0.165673	0.258062							0.3106	0.231897	0.127224
0.434352	0.123171	0.0624303	0.0959543	0.207078								0.161514	0.202044	0.111357	0.530602							0.148438	0.206752	0.0885396	0.181119							0.0825493	0.0538775	0.0640534	0.138137							0.179678	0.0896887	0.104191
0.215221	0.152281	0.0875931	0.204107	0.190782								0.128605	0.0808761	0.108146	0.449552							0.235478	0.127275	0.0351835	0.0797217							0.0174532	0.283418	0.206169	0.121577							0.0355006	0.263182	0.200616
0.241124	0.188062	0.0633601	0.25303	0.206697								0.0924281	0.0947412	0.276977	0.167386							0.239015	0.0441511	0.0859957	0.1614							0.0805971	0.534244	0.151184	0.0181655							0.116996	0.0418233	0.101017
0.129445	0.0683819	0.0570047	0.297341	0.0967574								0.277687	0.117856	0.197034	0.129611							0.157628	0.12226	0.135396	0.300954							0.284889	0.250172	0.139705	0.305645							0.433136	0.27265	0.181933
0.230561	0.082577	0.120953	0.0800841	0.363364								0.158008	0.376045	0.273492	0.188256							0.269376	0.111141	0.200565	0.292485							0.155596	0.0966757	0.0722653	0.208092							0.0297009	0.0416446	0.0412636
0.265955	0.191138	0.202187	0.0932398	0.157012								0.223386	0.13051	0.108826	0.0611098							0.302068	0.070128	0.179323	0.0270371							0.205252	0.0881549	0.010302	0.119714							0.0764903	0.0853076	0.264766
0.128215	0.105194	0.0403774	0.0917572	0.170482								0.0922558	0.101313	0.113441	0.0556573							0.157458	0.145408	0.249628	0.0624464							0.0554261	0.274482	0.0740003	0.280967							0.129756	0.188754	0.191217
0.298216	0.0326133	0.209822	0.12882	0.20777								0.159699	0.0935387	0.360038	0.0576873							0.139977	0.143902	0.164862	0.280378							0.153012	0.184272	0.0740341	0.238393							0.249638	0.170205	0.0554257
0.158002	0.334476	0.156736	0.216285	0.190538								0.138059	0.159813	0.393558	0.0147744							0.0131298	0.260889	0.0713394	0.219619							0.17209	0.118292	0.00075677	0.141707							0.0930567	0.0557809	0.292647
0.0560386	0.140502	0.19055	0.258318	0.220443								0.163069	0.469556	0.0949103	0.0279112							0.300184	0.149601	0.0637344	0.103963							0.211625	0.086844	0.196947	0.254482							0.0605488	0.156996	0.280698
0.0576056	0.200916	0.249518	0.200344	0.0388346								0.0781766	0.178985	0.193178	0.256741							0.0498476	0.0327557	0.0195796	0.186506							0.257864	0.157476	0.158015	0.329401							0.0964817	0.188464	0.0632142
0.180942	0.0589542	0.197076	0.0410456	0.239535								0.176151	0.183661	0.101519	0.111106							0.0304245	0.278208	0.0452119	0.122388							0.183724	0.148418	0.0393046	0.155696							0.0630981	0.0600502	0.0557549
0.0876799	0.0181505	0.196779	0.124925	0.240344								0.0702469	0.144156	0.0340044	0.277239							0.0182106	0.167787	0.355427	0.127014							0.0564479	0.205764	0.0283224	0.0781979							0.10191	0.0802512	0.0645059
0.105962	0.0395129	0.0768968	0.168402	0.0697955								0.103882	0.16643	0.210019	0.126795							0.070855	0.938365	0.172413	0.25631							0.101618	0.0967421	0.132935	0.0332633							0.056157	0.0580439	0.0925993
0.181187	0.175574	0.11719	0.0863631	0.141667								0.172291	0.30787	0.0426042	0.246442							0.0502329	0.254984	0.285098	0.202303							0.170818	0.060882	0.123156	0.0651331							0.143652	0.159877	0.0471194
0.169854	0.0411367	0.101339	0.338439	0.114239								0.0755314	0.111051	0.158348	0.150608							0.0484162	0.0567784	0.181295	0.212218							0.152537	0.128526	0.237773	0.0579004							0.0585936	0.0927042	0.237661
0.0716107	0.230375	0.0892466	0.0900515	0.110646								0.156153	0.139125	0.0944074	0.0471562							0.44484	0.1631	0.119927	0.0411281							0.0407423	0.180742	0.018545	0.146404							0.102108	0.02982	0.113221
0.0704103	0.197831	0.197642	0.277312	0.11703								0.220934	0.180723	0.232321	0.096051							0.184983	0.0999154	0.147401	0.176127							0.0636832	0.0822805	0.00613586	0.0196441							0.066373	0.134812	0.241638
0.00577976	0.182172	0.197957	0.242351	0.0559716								0.140397	0.125438	0.154354	0.113957							0.138724	0.229055	0.102884	0.0215098							0.103194	0.0380732	0.145819	0.105493							0.316094	0.078765	0.097584
0.206491	0.195128	0.101018	0.161534	0.264345								0.989468	0.227926	0.0919704	0.155342							0.148994	0.213139	0.280589	0.0696297							0.329398	0.0401162	0.259678	0.0468397							0.110104	0.0569715	0.0379681
0.123804	0.104884	0.0825938	0.21921	0.140144								0.102638	0.0690321	0.172306	0.23386							0.146494	0.202732	0.123003	0.469213							0.298579	0.0836125	0.0271678	0.89583							0.0745261	0.097109	0.177826
0.145021	0.481631	0.128179	0.0274486	0.308822								0.194903	0.218575	0.0768769	0.144706							0.0283901	0.135265	0.0668239	0.302461							0.121247	0.0267679	0.0876277	0.0272195							0.0643363	0.0801307	0.102927
0.0303418	0.204412	0.0435374	0.177251	0.221045								0.136251	0.0558318	0.389128	0.168891							0.189577	0.159205	0.349433	0.119089							0.0371919	0.0448478	0.163981	0.103214							0.110211	0.0742449	0.0508266
0.297735	0.197582	0.143993	0.216716	0.113159								0.117247	0.104272	0.108216	0.237888							0.222888	0.0297573	0.124511	0.0953917							0.0587816	0.103746	0.0562461	0.0680371							0.0954734	0.265171	0.0471982
0.17775	0.2872	0.0190385	0.0432956	0.192299								0.040524	0.169349	0.136368	0.0821075							0.115864	0.080532	0.242406	0.0641073							0.110663	0.139187	0.101649	0.138268							0.137434	0.0595352	0.0735664
0.0773494	0.171281	0.168385	0.0832334	0.169405								0.157075	0.0734193	0.291012	0.129474							0.193621	0.0799236	0.0441117	0.333344							0.206744	0.0383222	0.104416	0.0830816							0.0560518	0.237107	0.169031
0.349397	0.115252	0.289491	0.0582041	0.240623								0.0723256	0.141905	0.0783178	0.174863							0.170775	0.247991	0.33438	0.71998							0.210336	0.0854011	0.090216	0.147574							0.0657691	0.19791	0.168505
0.100102	0.0854672	0.111306	0.0508745	0.294052								0.17261	0.118973	0.259271	0.173377							0.0661452	0.272152	0.0971501	0.0979585							0.0650953	0.074284	0.193604	0.126846							0.146767	0.232774	0.203635
0.175108	0.0276404	0.249075	0.135045	0.282167								0.0841205	0.26674	0.215933	0.165535							0.158649	0.241098	0.0475869	0.0983419							0.0905076	0.477793	0.275813	0.034165							0.0387538	0.0248531	0.998669
0.0378389	0.27472	0.0236736	0.109026	0.0196144								0.154064	0.0400239	0.167012	0.170696							0.094276	0.181107	0.08328	0.177349							0.0648482	0.491811	0.0827522	0.165944							0.0705153	0.048218	0.0522068
0.0711608	0.149497	0.263509	0.179616	0.162083								0.27092	0.808537	0.0907961	0.0971807							0.0086731	0.0567943	0.342047	0.120503							0.235769	0.253313	0.176121	0.156385							0.0592899	0.0724425	0.191356
0.112698	0.136748	0.0388154	0.127051	0.053171								0.151763	0.127149	0.0442963	0.100885							0.138019	0.238055	0.113874	0.246542							0.132211	0.0605492	0.0410166	0.195761							0.0466769	0.0787877	0.104662
0.213999	0.130205	0.199551	0.034612	0.648327								0.214549	0.071702	0.598067	0.213637							0.108761	0.19279	0.0746325	0.0645857							0.150924	0.966803	0.0478259	0.139968							0.120376	0.181231	0.0577032
0.0409941	0.156543	0.101371	0.1459	0.260305								0.116505	0.0693839	0.104794	0.707486							0.121547	0.133298	0.0781571	0.0821389							0.104411	0.0832036	0.0580569	0.221684							0.165584	0.0881734	0.0549889
0.0456818	0.170046	0.161563	0.224972	0.0779018								0.143856	0.099633	0.0481558	0.0659317							0.171017	0.219057	0.14348	0.123381							0.0765897	0.247429	0.0469444	0.350212							0.0179026	0.0854685	0.19452
0.0545476	0.157515	0.177769	0.149978	0.0809584								0.0804066	0.0506417	0.0548112	0.172789							0.360918	0.124529	0.0591096	0.158843							0.374461	0.0708132	0.271471	0.138199							0.0205372	0.197201	0.0783203
0.284625	0.0443606	0.118319	0.0428309	0.162323								0.17015	0.105476	0.061625	0.211571							0.126754	0.189628	0.032031	0.101944							0.137751	0.359884	0.106804	0.0161665							0.0814686	0.0495895	0.01336
0.0582267	0.11113	0.272977	0.153552	0.123249								0.685008	0.0720936	0.117575	0.293542							0.0469409	0.125265	0.0487218	0.0676782							0.00218738	0.161049	0.211876	0.105663							0.116723	0.0344551	0.140016
0.131224	0.0825818	0.223787	0.201124	0.0726451								0.168927	0.0162711	0.258355	0.363829							0.130905	0.336523	0.165035	0.0648404							0.23579	0.0665865	0.102788	0.138026							0.19245	0.0663133	0.150966
0.104322	0.142677	0.264234	0.269116	0.167057								0.134724	0.0328812	0.237692	0.206235							0.367053	0.12374	0.124099	0.190055							0.23822	0.0485829	0.313849	0.129074							0.158715	0.0674282	0.143785
0.276289	0.156509	0.156199	0.14807	0.119636								0.174487	0.0161947	0.0676915	0.167217							0.0813254	0.303083	0.308565	0.124991							0.0599114	0.0636634	0.107573	0.216146							0.226579	0.0595679	0.176835
0.0276676	0.31848	0.116714	0.0238696	0.138616								0.0385139	0.028016	0.314401	0.199515							0.308549	0.10931	0.045349	0.162672							0.0953643	0.155309	0.0350144	0.0435682							0.0885106	0.095817	0.169775
0.138936	0.182797	0.164883	0.105503	0.0863753								0.0672463	0.0388828	0.12734	0.0762066							0.147692	0.0574098	0.0723505	0.582953							0.217733	0.0774987	0.102153	0.0579928							0.135576	0.162007	0.192831
0.0412938	0.0569092	0.215257	0.27485	0.102367								0.0802211	0.12322	0.430985	0.253631							0.10715	0.0716887	0.173572	0.330839							0.0882386	0.105841	0.158004	0.134553							0.229693	0.280813	0.0453858
0.100651	0.184516	0.230519	0.0846846	0.133433								0.335028	0.0492007	0.167587	0.290009							0.274835	0.289442	0.0977813	0.168919							0.137661	0.0639851	0.0865198	0.148913							0.123125	0.126091	0.0303038
0.223444	0.108311	0.140538	0.148107	0.0987841								0.254883	0.174951	0.0506257	0.0504235							0.14267	0.214784	0.0726387	0.254803							0.132743	0.294726	0.105103	0.384299							0.175137	0.632574	0.0396044
0.0825721	0.201331	0.109736	0.128633	0.181997								0.0600978	0.0488707	0.211471	0.230836							0.282253	0.133276	0.148601	0.252542							0.00608239	0.299066	0.200639	0.049756							0.0707508	0.222748	0.121958
0.0833996	0.0578408	0.292872	0.154851	0.178204								0.00811449	0.260811	0.116042	0.257045							0.182131	0.110929	0.0759765	0.164568							0.126814	0.306551	0.237404	0.0931857							0.0694473	0.138292	0.0564148
0.118129	0.0257115	0.0839021	0.0595545	0.0741233								0.100806	0.0138373	0.170175	0.0810575							0.0647537	0.15121	0.171261	0.917588							0.118045	0.148787	0.161133	0.141551							0.117255	0.0221619	0.173262
0.0615916	0.129625	0.13615	0.150296	0.0485535								0.0934603	0.199413	0.278782	0.184828							0.0376363	0.217023	0.0550991	0.0817352							0.0302017	0.0829874	0.362289	0.116585							0.0236897	0.0451959	0.0908565
0.142906	0.0824339	0.232433	0.0416787	0.10718								0.205342	0.132756	0.204039	0.115646							0.257385	0.222031	0.158577	0.131844							0.0715713	0.0458187	0.10273	0.0679679							0.186502	0.0517347	0.0940234
0.0656435	0.087584	0.198675	0.105503	0.174001								0.372272	0.273038	0.222723	0.0462388							0.150994	0.303501	0.219364	0.113041							0.103862	0.072169	0.113198	0.130109							0.103647	0.351802	0.108521
1.06702	0.127741	0.0853703	0.167324	0.03824								0.133536	0.0902913	0.115026	0.160133							0.0799018	0.0954561	0.104454	0.0111933							0.309644	0.03884	0.315134	0.178477							0.0363953	0.120636	0.0640166
0.0816727	0.0781523	0.20748	0.259263	0.236102								0.291651	0.227347	0.158118	0.26833							0.149627	0.0985154	0.0604002	0.0227403							0.168936	0.160915	0.0502825	0.156418							0.0703724	0.210013	0.242065
0.226395	0.255703	0.114029	0.321336	0.107023								0.126904	0.120133	0.199285	0.270683							0.199853	0.155544	0.259854	0.10955							0.152476	0.132699	0.128177	0.162759							0.0631147	0.154988	0.0819673
0.0940754	0.273044	0.0809279	0.810956	0.0869474								0.101107	0.0636093	0.0752898	0.215312							0.136076	0.194916	0.683872	0.0267114							0.210512	0.107811	0.094266	0.0999835							0.0411896	0.0417176	0.0485097
0.0917808	0.163861	0.304245	0.216301	0.214521								0.237893	0.209737	0.0619895	0.137461							0.25612	0.228144	0.29135	0.149449							0.164488	0.134026	0.0593382	0.0650872							0.187302	0.0526284	0.0258475
0.0763554	0.0406795	0.208916	0.113569	0.789833								0.14788	0.0171078	0.16909	0.123004							0.176716	0.162901	0.205607	0.215105							0.0443525	0.0535203	0.101597	0.249702							0.0598412	0.114037	0.0811466
0.120322	0.132032	0.252103	0.148435	0.140308								0.00859522	0.128371	0.107427	0.215748							0.80941	0.275933	0.148514	0.165601							0.0272748	0.0872255	0.116668	0.11564							0.0467507	0.225266	0.0861205
0.0670288	0.14047	0.210726	0.299182	0.144886								0.138373	0.0809859	0.196541	0.115839							0.147372	0.00787571	0.041053	0.197272							0.112459	0.162581	0.0936992	0.0657814							0.12035	0.0324913	0.12757
0.159373	0.193822	0.263423	0.72146	0.124903								0.155985	0.484063	0.311565	0.108993							0.151025	0.113742	0.0654712	0.194678							0.0536331	0.140172	0.0707113	0.0478411							0.0986951	0.305389	0.0734756
0.287354	0.259713	0.111888	0.0947843	0.187297								0.178385	0.29367	0.256303	0.0108176							0.123855	0.210684	0.0413665	0.0586964							0.0970516	0.228492	0.301628	0.0712689							0.089581	0.187958	0.0787603
0.234623	0.0984486	0.13649	0.0333102	0.141903								0.0629869	0.169344	0.205668	0.0844631							0.269595	0.0160369	0.118355	0.0253256							0.122279	0.0303918	0.0816438	0.36865							0.108124	0.0840308	0.0630672
0.110708	0.910219	0.173941	0.109443	0.164097								0.0656098	0.366964	0.130171	0.321084							0.290754	0.170692	0.213328	0.0980113							0.0488718	0.120372	0.111086	0.189167							0.0934104	0.141221	0.0489684
0.152613	0.158503	0.148076	0.386011	0.0741461								0.210089	0.407065	0.154413	0.217058							0.238326	0.0359566	0.017068	0.0839271							0.206618	0.062723	0.0528254	0.0400274							0.0670862	0.0698908	0.251079
0.130442	0.16226	0.216752	0.0444619	0.0631992								0.165076	0.21625	0.15513	0.226084							0.100372	0.135105	0.191247	0.0257362							0.127005	0.188261	0.106557	0.192886							0.111965	0.344675	0.0964544
0.167166	0.110896	0.158844	0.168306	0.0989114								0.257737	0.128914	0.0809626	0.145685							0.156005	0.147422	0.0800011	0.07369							0.0890667	0.132134	0.0770516	0.157726							0.0892535	0.0332763	0.107194
0.127568	0.1006	0.0800432	0.127399	0.0868332								0.0902573	0.0361819	0.112929	0.101587							0.154126	0.187854	0.0882576	0.0392974							0.00318673	0.0237967	0.187473	0.411597							0.0957627	0.0814877	0.495027
0.0540365	0.154357	0.0198208	0.146836	0.0704388								0.0503843	0.136535	0.276647	0.238461							0.223764	0.165224	0.12222	0.322001							0.080306	0.305541	0.1893	0.0208653							0.0555718	0.10893	0.152325
0.146612	0.0456336	0.0419517	0.135961	0.182551								0.145223	0.170281	0.106206	0.140994							0.160001	0.0991439	0.117892	0.173918							0.154771	0.277176	0.1635	0.051001							0.119189	0.0280276	0.168375
0.245592	0.0613969	0.127065	0.143045	0.144156								0.0976991	0.226921	0.125248	0.164116							0.117861	0.359468	0.123369	0.19984							0.0434596	0.116912	0.114225	0.200489							0.0783489	0.0765431	0.0564473
0.213087	0.0495228	0.251727	0.360654	0.0642135								0.195943	0.0639003	0.710409	0.179029							0.073718	0.15649	0.127569	0.140283							0.116427	0.0862119	0.0511731	0.143746							0.0296325	0.103637	0.0227691
0.167693	0.121082	0.136568	0.14816	0.0571314								0.249439	0.247679	0.03933	0.261271							0.212861	0.105162	0.232013	0.109461							0.0904894	0.134102	0.039731	0.126311							0.833624	0.105532	0.124728
0.196859	0.140979	0.146224	0.0624906	0.135735								0.138038	0.616358	0.104904	0.248297							0.0776409	0.202213	0.197095	0.232501							0.127505	0.0651823	0.0530538	0.0591717							0.0870179	0.0612367	0.114421
0.173196	0.111539	0.0314911	0.0356363	0.176186								0.0851933	0.180145	0.0768559	0.0906252							0.141438	0.106412	0.200585	0.0890565							0.0615981	0.141064	0.01243	0.136722							0.282182	0.135426	0.140749
0.191691	0.170978	0.227271	0.165392	0.0986369								0.0367596	0.313801	0.0300366	0.186785							0.286976	0.0681765	0.169815	0.361527							0.269624	0.0509021	0.107171	0.124033							0.114093	0.282157	0.207504
0.193472	0.0876029	0.0240182	0.0442753	0.258749								0.158312	0.226073	0.0621613	0.253118							0.0635121	0.163597	0.0345314	0.454648							0.0395821	0.0423067	0.183862	0.0330575							0.0511742	0.121948	0.0741088
0.01286	0.160185	0.0930252	0.083805	0.232069								0.127583	0.0536375	0.108516	0.0983118							0.397115	0.0409869	0.187363	0.0792357							0.163633	0.0794585	0.465326	0.11202							0.0388555	0.0927698	0.199192
0.203451	0.244503	0.146245	0.0506265	0.106545								0.135932	0.0534342	0.147955	0.190432							0.279634	0.0860808	0.308683	0.113783							0.196314	0.129128	0.115124	0.0841578							0.139124	0.0814527	0.074642
0.192576	0.0909708	0.196266	0.208382	0.37854								0.209464	0.289149	0.128823	0.25415							0.140405	0.167257	0.0553814	0.296113							0.0710869	0.0790732	0.033273	0.155833							0.329769	0.201203	0.187859
0.0586258	0.223686	0.0871295	0.152008	0.242194								0.155256	0.0520552	0.0522458	0.14712							0.151302	0.106022	0.222913	0.20502							0.0501659	0.067741	0.120954	0.308927							0.102588	0.103927	0.170732
0.222759	0.17308	0.117944	0.0637217	0.132707								0.0855547	0.241279	0.271188	0.176658							0.0870608	0.115627	0.136846	0.0540051							0.150436	0.130089	0.100521	0.145009							0.145847	0.143089	0.0332486
0.0831616	0.101477	0.211277	0.175439	0.077993								0.260477	0.296365	0.106077	0.969677							0.410628	0.0870593	0.156941	0.135664							0.0321681	0.0711963	0.247744	0.189538							0.139046	0.0596047	0.144063
0.120296	0.112485	0.0489153	0.182557	0.106512								0.284932	0.160596	0.691025	0.132528							0.208827	0.212587	0.13829	0.837862							0.112157	0.0393729	0.0306399	0.231207							0.137703	0.0486233	0.136967
0.118817	0.253037	0.184187	0.188667	0.265806								0.16943	0.201379	0.192831	0.276725							0.167581	0.151034	0.0761318	0.181448							0.15696	0.022784	0.0388832	0.066786							0.0608189	0.102204	0.060891
0.201481	0.140069	0.0622221	0.0901132	0.103525								0.112675	0.185552	0.024169	0.15242							0.140685	0.185649	0.0749765	0.224554							0.207322	0.0896716	0.135755	0.122597							0.223623	0.0329902	0.135684
0.189592	0.14393	0.164637	0.0992778	0.142039								0.0775163	0.427447	0.0585001	0.128859							0.162469	0.217805	0.0205401	0.066334							0.0213652	0.13603	0.119115	0.221365							0.132411	0.456176	0.0453908
0.066481	0.137713	0.239013	0.211452	0.155867								0.0966595	0.237782	0.0819884	0.029902							0.312335	0.143146	0.20537	0.112887							0.190266	0.292856	0.12825	0.195812							0.0334641	0.0626426	0.0403348
0.0996173	0.11432	0.308623	0.0402967	0.0445748								0.290482	0.219951	0.32312	0.181782							0.17748	0.224712	0.0940317	0.300705							0.144615	0.0532368	0.0844247	0.046687							0.16807	0.138002	0.07642
0.213653	0.143391	0.130691	0.0647815	0.327873								0.0965006	0.364112	0.256755	0.0487664							0.182349	0.0426757	0.314562	0.10911							0.0666948	0.0334834	0.128076	0.154055							0.167539	0.131666	0.0487968
0.0587864	0.220665	0.447679	0.0723373	0.164466								0.0816683	0.14939	0.120857	0.25684							0.089571	0.0316388	0.169468	0.155397							0.051005	0.113356	0.0816534	0.0328509							0.0723674	0.0712498	0.155839
0.0692997	0.17797	0.0901466	0.184099	0.116607								0.185389	0.254962	0.240807	0.0636588							0.0391024	0.382441	0.430548	0.160173							0.208069	0.0399394	0.0250245	0.042732							0.110431	0.123143	0.31652
0.124539	0.302574	0.384561	0.197533	0.0801087								0.059172	0.0404957	0.0932001	0.0588413							0.334132	0.198422	0.279335	0.381406							0.110296	0.117304	0.149933	0.0823511							0.0232005	0.18638	0.0317326
0.164418	0.0652725	0.239684	0.226491	0.26221								0.361977	0.133188	0.239841	0.154441							0.620092	0.226548	0.156188	0.457098							0.065029	0.12653	0.0400171	0.1068							0.0813798	0.0878867	0.0838037
0.0456104	0.274649	0.433328	0.903744	0.0724857								0.113442	0.112716	0.311738	0.191701							0.378573	0.280222	0.104989	0.0361415							0.0133874	0.223208	0.118897	0.0486087							0.152775	0.0926659	0.199622
0.0860859	0.138407	0.153165	0.0515299	0.136848								0.0349022	0.0941886	0.0759531	0.229757							0.111213	0.148628	0.0936726	0.0459506							0.123362	0.198668	0.204821	0.194331							0.119935	0.0696434	0.139559
0.0771676	0.0473623	0.295291	0.0545937	0.159543								0.23117	0.104306	0.143183	0.383217							0.243698	0.109168	0.268202	0.230304							0.0409527	0.107266	0.119179	0.106824							0.0929522	0.0771145	0.152425
0.0924397	0.141789	0.116101	0.306686	0.163818								0.673558	0.29589	0.0898585	0.226367							0.148324	0.381602	0.279183	0.239437							0.146139	0.149992	0.240644	0.30343							0.155993	0.11548	0.232397
0.107375	0.0156455	0.242968	0.229301	0.0715058								0.282832	0.0580447	0.0762386	0.254895							0.147854	0.0997024	0.381057	0.0193312							0.287085	0.0469031	0.816469	0.17089							0.0753814	0.104452	0.225974
0.175935	0.16474	0.0835288	0.225449	0.20491								0.588405	0.289323	0.220525	0.398102							0.0423225	0.306083	0.22835	0.102664							0.088577	0.044622	0.073458	0.0593976							0.0674656	0.101233	0.118192
0.193152	0.116881	0.106533	0.239547	0.208124								0.210423	0.0860538	0.0945204	0.0430183							0.196661	0.134405	0.265622	0.121093							0.116642	0.279011	0.169749	0.16457							0.0626944	0.116783	0.141319
0.917457	0.13875	0.117062	0.123464	0.0938053								0.270826	0.139112	0.194072	0.0700491							0.248473	0.209654	0.176496	0.272238							0.180247	0.0245467	0.105624	0.134151							0.0618187	0.0831826	0.0348607
0.174371	0.19428	0.202217	0.184767	0.0437545								0.169993	0.114448	0.226296	0.024088							0.50803	0.118637	0.172003	0.300602							0.06858	0.180715	0.294048	0.214954							0.126921	0.0466097	0.0796363
0.174273	0.0793196	0.059678	0.0468341	0.227088								0.111742	0.12624	0.359422	0.0289701							0.212555	0.11828	0.130484	0.0822447							0.341808	0.139586	0.134257	0.262303							0.199733	0.16327	0.0891141
0.137721	0.185896	0.151223	0.236545	0.0435856								0.156251	0.291246	0.159728	0.0131555							0.164141	0.0959104	0.290806	0.245576							0.218088	0.353494	0.201331	0.090203							0.293894	0.247826	0.139228
0.188309	0.0671163	0.108234	0.0633825	0.133666								0.286582	0.0486572	0.0839304	0.119059							0.197114	0.208085	0.0791409	0.159206							0.0483893	0.115829	0.257904	0.214481							0.157129	0.229004	0.029076
0.0800832	0.172082	0.101759	0.282567	0.101025								0.793752	0.111309	0.0716185	0.158485							0.133883	0.0995852	0.0651866	0.0742193							0.0982703	0.0582807	0.182181	0.111889							0.153148	0.115451	0.0247573
0.111123	0.226188	0.219367	0.116621	0.0709683								0.363356	0.133261	0.279615	0.235146							0.12523	0.131241	0.108843	0.10217							0.0765007	0.0977139	0.0944508	0.0733007							0.0833295	0.100359	0.0616648
0.0718573	0.0606973	0.118924	0.152928	0.0404736								0.0780229	0.5656	0.323397	0.0731102							0.337381	0.136332	0.101214	0.102187							0.0739604	0.09942	0.137705	0.086317							0.167471	0.0402862	0.100645
0.180402	0.0671949	0.155633	0.0750048	0.0353376								0.221685	0.344933	0.248771	0.265053							0.236373	0.259743	0.0544159	0.14761							0.109837	0.0926708	0.468727	0.0337268							0.0118431	0.150127	0.121431
0.242646	0.185742	0.15532	0.0981517	0.245323								0.167393	0.0114853	0.101545	0.184353							0.0466001	0.14594	0.0580539	0.0916458							0.0447902	0.0769352	0.17276	0.0766332							0.160976	0.0750716	0.12754
0.18724	0.131768	0.134925	0.158339	0.142908								0.334365	0.0378955	0.302428	0.0815267							0.27163	0.160844	0.0438326	0.251483							0.0848624	0.0776604	0.217257	0.0651839							0.162862	0.0868633	0.0290254
0.184109	0.0711838	0.0949644	0.238967	1.04657								0.190239	0.233414	0.188225	0.0682182							0.241377	0.167212	0.0640015	0.11626							0.0634841	0.00354282	0.0588074	0.0151179							0.118848	0.0337869	0.10597
0.132618	0.168786	0.198112	0.0987193	0.443325								0.138361	0.327848	0.118138	0.157784							0.275408	0.284476	0.120379	0.102967							0.0504118	0.0469547	0.184146	0.196566							0.104513	0.0912467	0.00665316
0.126412	0.144753	0.301648	0.332107	0.188453								0.205628	0.254165	0.0267795	0.251719							0.0927023	0.198681	0.154015	0.139499							0.140397	0.174333	0.254342	0.0521443							0.193344	0.0355762	0.210737
0.143194	0.252032	0.226507	0.245679	0.0978825								0.210971	0.132855	0.212559	0.198017							0.17227	0.254253	0.191579	0.155306							0.1073	0.069889	0.115178	0.0366591							0.242245	0.0391392	0.06527
0.0745153	0.036874	0.237225	0.217725	0.103933								0.282466	0.137739	0.0973488	0.111372							0.188357	0.0718676	0.371845	0.0688135							0.0956008	0.109318	0.0892468	0.0517288							0.0297294	0.0715577	0.0721697
0.0958208	0.0569296	0.130462	0.129561	0.0894242								0.0809795	0.153005	0.0501312	0.237961							0.226403	0.149911	0.0860949	0.174521							0.343531	0.106804	0.332111	0.133904							0.20861	0.200795	0.0510118
0.494377	0.0696915	0.135652	0.291219	0.179974								0.275449	0.0989602	0.147504	0.0543037							0.141101	0.114726	0.0169993	0.177254							0.178627	0.219863	0.473449	0.307944							0.174508	0.114357	0.128222
0.183722	0.222649	0.235363	0.0183407	0.201791								0.123353	0.659762	0.180199	0.297148							0.0883812	0.135874	0.294137	0.144799							0.0727794	0.0424476	0.109629	0.0288251							0.0432888	0.115411	0.0216999
0.0896978	0.24695	0.136761	0.157443	0.141279								0.249855	0.233795	0.0513626	0.0923139							0.0829593	0.0849366	0.128441	0.223019							0.176403	0.0332779	0.0926227	0.178711							0.115888	0.0253274	0.0253563
0.159041	0.0903303	0.184124	0.0733187	0.234793								0.137314	0.135027	0.0662842	0.0476053							0.225789	0.0858183	0.171827	0.10402							0.125714	0.0437027	0.0704797	0.247364							0.195007	0.029656	0.0546869
0.163072	0.0719766	0.153449	0.511465	0.163449								0.116344	0.246112	0.0559576	0.103932							0.128788	0.086127	0.0871499	0.146028							0.155376	0.0494462	0.266148	0.144628							0.191161	0.0573585	0.0155154
0.309208	1.04184	0.14696	0.254825	0.0655277								0.209085	0.109246	0.352789	0.0388987							0.353813	0.203199	0.0954237	0.615792							0.102708	0.204736	0.134778	0.0801048							0.15223	0.0689045	0.105158
0.246101	0.0921715	0.209858	0.0564116	0.128984								0.196062	0.126788	0.101754	0.0755276							0.177415	0.157107	0.14082	0.221247							0.860182	0.0573572	0.120334	0.128908							0.098305	0.0513816	0.1206
0.16433	0.376851	0.146524	0.11304	0.557989								0.155677	0.186948	0.198834	0.0576059							0.0494043	0.359996	0.0751625	0.184739							0.211211	0.296034	0.112456	0.123536							0.034759	0.12087	0.222242
0.150246	0.178568	0.0798307	0.214035	0.215914								0.325116	0.0861529	0.0885701	0.0993576							0.244667	0.118873	0.122977	0.53275							0.10321	0.222776	0.131792	0.0629998							0.251657	0.0368634	0.516303
0.214607	0.239252	0.225752	0.256548	0.0698727								0.108589	0.0719793	0.0887271	0.518598							0.317129	0.217957	0.0318695	0.0514606							0.233585	0.131989	0.107023	0.15157							0.0659936	0.181523	0.172216
0.15768	0.238539	0.132402	0.272408	0.213229								0.209681	0.0538603	0.114014	0.15397							0.116263	0.32288	0.10603	0.352873							0.202221	0.143977	0.177806	0.186907							0.102037	0.195442	0.113286
0.189836	0.155324	0.0944721	0.176835	0.0080367								0.202994	0.0519175	0.0680836	0.119849							0.181205	0.138476	0.100233	0.272135							0.130008	0.0571008	0.140812	0.187232							0.143297	0.143459	0.13567
0.232105	0.107464	0.0162745	0.334189	0.184916								0.245075	0.0155015	0.283213	0.0483596							0.104809	0.417545	0.0681742	0.0779993							0.255415	0.261813	0.0928141	0.408234							0.0681236	0.135357	0.0401373
0.221582	0.107557	0.188309	0.147165	0.197938								0.0834958	0.11818	0.0248463	0.0418699							0.0483291	0.233666	0.305516	0.269433							0.0436942	0.0966701	0.34636	0.183322							0.129083	0.14423	0.0634871
0.124871	0.213565	0.614144	0.0461962	0.136053								0.0389054	0.00607792	0.192276	0.69354							0.336682	0.155793	0.300839	0.235616							0.108667	0.118036	0.157309	0.141692							0.0511986	0.123109	0.109061
0.20736	0.207252	0.18756	0.0447898	0.0800379								0.0633276	0.223889	0.0606294	0.136999							0.111705	0.285424	0.147187	0.210022							0.0934039	0.228959	0.199091	0.248523							0.0626123	0.0705116	0.0197767
0.241085	0.18939	0.0434197	0.36796	0.0602017								0.0928368	0.32545	0.104935	0.126606							0.129262	0.227284	0.131826	0.171957							0.0478616	0.112061	0.178673	0.143093							0.0426477	0.0547482	0.171422
0.114647	0.0980663	0.0473953	1.07357	0.198776								0.0330658	0.428443	0.0758197	0.154298							0.440576	0.135398	0.0237792	0.304208							0.0623601	0.125338	0.0591305	0.192463							0.103918	0.362921	0.10056
0.0275583	0.0551341	0.029702	0.100966	0.27911								0.237636	0.0966631	0.122187	0.215242							0.0735419	0.209931	0.159229	0.0444288							0.0412456	0.0682227	0.040913	0.131009							0.0388647	0.0354712	0.0543199
0.494256	0.212589	0.486622	0.187098	0.209725								0.170631	0.063288	0.210318	0.374603							0.274124	0.238397	0.0952768	0.0360053							0.010318	0.186561	0.17038	0.114818							0.125936	0.24168	0.0436452
0.145894	0.230425	0.108232	0.0434131	0.254535								0.261745	0.0498895	0.077255	0.0777127							0.0800727	0.225528	0.175307	0.0583567							0.0554402	0.153112	0.0865838	0.126205							0.024869	0.0141461	0.0521981
0.0696947	0.129672	0.11332	0.240177	0.200976								1.086	0.0216708	0.0534669	0.173516							0.0349267	0.13429	0.363057	0.0200428							0.0730762	0.127715	0.255586	0.309148							0.206236	0.0492593	0.0444207
0.214198	0.218225	0.110973	0.218051	0.254327								0.033679	0.0929298	0.066423	0.0896101							0.104152	0.198513	0.119196	0.133805							0.115721	0.101801	0.1369	0.0774132							0.0778418	0.0506075	0.161503
0.239388	0.072969	0.175093	0.158027	0.130889								0.115658	0.0557805	0.043395	0.0611654							0.0839188	0.208585	0.143483	0.342485							0.036383	0.107888	0.0400129	0.0338451							0.0375408	0.093478	0.212039
0.137434	0.259102	0.185571	0.0686806	0.0775274								0.256067	0.271039	0.0712977	0.236305							0.431767	0.105382	0.050603	0.173017							0.213979	0.0713609	0.102843	0.051412							0.0936593	0.0610088	0.153776
0.150717	0.191642	0.234447	0.153301	0.0925676								0.310476	0.200812	0.109995	0.0906678							0.130673	0.182245	0.105754	0.115237							0.105947	0.217463	0.177665	1.00304							0.0521155	0.199955	0.162118
0.0798544	0.171514	0.311602	0.0508299	0.720691								0.0495115	0.0951604	0.0526306	0.224571							0.188379	0.0223291	0.0420281	0.0272725							0.0118224	0.108408	0.0104164	0.12651							0.092504	0.260075	0.130814
0.0221489	0.0834263	0.704428	0.0298625	0.0464324								0.0759571	0.172968	0.130971	0.0893273							0.117533	0.0669419	0.0665843	0.0231781							0.0301504	0.0800467	0.103249	0.298058							0.0960867	0.194962	0.051344
0.0382553	0.190171	0.0915124	0.0803618	0.172052								0.326211	0.163018	0.38616	0.241879							0.106412	0.109792	0.056007	0.113572							0.0829977	0.054883	0.453365	0.0911341							0.105347	0.163274	0.220598
0.255688	0.196948	0.217353	0.200536	0.231066								0.0698181	0.159908	0.261154	0.169837							0.0187723	0.30852	0.0875028	0.0391325							0.0507771	0.1777	0.107341	0.0694324							0.0684226	0.284831	0.18299
0.184238	0.0737504	0.28026	0.0620864	0.152264								0.27203	0.116113	0.196836	0.427551							0.288697	0.187884	0.0516973	0.0884174							0.195119	0.0589176	0.244542	0.161191							0.0118527	0.0283057	0.174213
0.0654132	0.0743913	0.105002	0.0536795	0.167045								0.252155	0.160443	0.0721773	0.041989							0.133435	0.191959	0.154228	0.0614472							0.211749	0.380005	0.19733	0.00894227							0.0402343	0.308956	0.241444
0.889154	0.063566	0.0510342	0.145286	0.158377								0.0782817	0.230966	0.216833	0.0813015							0.145938	0.054136	0.226311	0.0959813							0.0459514	0.0546697	0.18969	0.0764429							0.0212415	0.0472103	0.048715
0.126433	0.113016	0.26038	0.0969992	0.123693								0.364333	0.188749	0.121509	0.0433223							0.273808	0.11245	0.127556	0.352492							0.142115	0.108196	0.100445	0.143618							0.121872	0.064944	0.158367
0.0632927	0.154529	0.204728	0.122326	0.0395182								0.097183	0.086671	0.143104	0.132144							0.116157	0.138604	0.132268	0.203548							0.195136	0.02549	0.0902899	0.224664							0.195158	0.075701	0.203108
0.159751	0.122453	0.221539	0.0213627	0.234026								0.179694	0.0985995	0.143253	0.0113207							0.151279	0.0773535	0.165535	0.180687							0.0514188	0.046892	0.194493	0.458061							0.10455	0.0417162	0.122128
0.120162	0.0801358	0.0941041	0.086549	0.150505								0.187548	0.0705264	0.827154	0.159119							0.0412224	0.0611053	0.207418	0.105869							0.228544	0.106086	0.169683	0.0299473							0.0797014	0.0844699	0.175645
0.266117	0.0593016	0.0609127	0.0669898	0.112542								0.128489	0.034352	0.222921	0.233927							0.0670716	0.0775634	0.26269	0.285875							0.155501	0.229051	0.0492301	0.111059							0.0831856	0.0528319	0.160571
0.218014	0.184178	0.071857	0.174254	0.132832								0.195863	0.127825	0.133398	0.173575							0.0782858	0.115913	0.0252773	0.245991							0.0524959	0.0894491	0.0867138	0.0695956							0.148274	0.313242	0.0654768
0.077246	0.100287	0.256383	0.248954	0.236407								0.117118	0.0247606	0.089647	0.215595							0.116941	0.030076	0.0899124	0.141105							0.0414056	0.0779462	0.0260833	0.0570497							0.0460592	0.169808	0.0910078
0.345484	0.0756667	0.0706999	0.119758	0.186524								0.369598	0.299805	0.171585	0.10945							0.112581	0.0936367	0.147871	0.223689							0.106773	0.202412	0.285642	0.258156							0.0742054	0.107204	0.0599191
0.258166	0.0567835	0.236865	0.169952	0.114749								0.00946348	0.218109	0.163881	0.262016							0.299193	0.0283034	0.356035	0.133382							0.202883	0.245125	0.168756	0.119882							0.104852	0.061062	0.0129965
0.120918	0.0573946	0.0847292	0.0183202	0.327374								0.32181	0.125044	0.154401	0.0932464							0.222949	1.03308	0.230536	0.126691							0.115249	0.206274	0.230983	0.0430738							0.0413597	0.147936	0.0879372
0.123523	0.0730168	0.165252	0.269592	0.363153								0.238886	0.15782	0.13898	0.282567							0.266726	0.0885572	0.119665	0.177358							0.0665981	0.152484	0.112076	0.0840729							0.051305	0.0599236	0.137752
0.106842	0.0673283	0.0408122	0.167775	0.0933742								0.109037	0.111877	0.169387	0.178279							0.173541	0.0842635	0.161757	0.199984							0.0295243	0.149512	0.0868536	0.132856							0.114018	0.10554	0.304957
0.0695132	0.215642	0.00678977	0.125524	0.0570694								0.266746	0.291698	0.248738	0.382127							0.299523	0.102693	0.259764	0.0395197							0.110963	0.0404092	0.0986361	0.0964033							0.127426	0.0852876	0.14041
0.0411562	0.105896	0.204861	0.293954	0.238943								0.224023	0.13083	0.29019	0.131192							0.219169	0.0130326	0.032618	0.0657238							0.19919	0.0932082	0.0564271	0.148591							0.166417	0.120713	0.00795621
0.0473006	0.123363	0.210655	0.151809	0.079305								0.144815	0.105244	0.114066	0.0469579							0.258183	0.151288	0.0754988	0.220616							0.123352	0.0869547	0.159853	0.18157							0.0820412	0.167672	0.0700459
0.0661154	0.136644	0.121487	0.903722	0.304719								0.176913	0.0739737	0.299075	0.0919327							0.136202	0.171494	0.198514	0.179272							0.102599	0.0459532	0.167569	0.0593519							0.15608	0.166863	0.113534
0.131516	0.105991	0.174414	0.0211427	0.210096								0.0424232	0.0765618	0.226055	0.155995							0.130388	0.188674	0.0584978	0.133097							0.182988	0.138529	0.0794296	0.0232503							0.1292	0.0926104	0.0578063
0.0530342	0.160836	0.121251	0.240104	0.140007								0.0876202	0.12503	0.134573	0.167114							0.115289	0.378774	0.0674598	0.188538							0.0736926	0.022944	0.0263819	0.260874							0.25024	0.070091	0.0967944
0.419538	0.0981793	0.132062	0.215956	0.204697								0.715768	0.150367	0.0745196	0.0104817							0.107945	0.117436	0.419779	0.270475							0.100236	0.0698185	0.0910554	0.0796946							0.0578117	0.0812114	0.105854
0.136293	0.152117	0.401853	0.345733	0.110963								0.359358	0.0447325	0.203621	0.111855							0.06422	0.0525656	0.115353	0.0208275							0.0504154	0.163457	0.193201	0.276466							0.112648	0.0551787	0.0526601
0.228401	0.191997	0.137177	0.206526	0.0446602								0.110681	0.123218	0.127245	0.224855							0.058208	0.171488	0.0793741	0.194106							0.0566892	0.0765884	0.114093	0.420207							0.0388873	0.0764662	0.0619405
0.126191	0.304014	0.132421	0.0178836	0.110477								0.150173	0.111951	0.24989	0.0276618							0.311205	0.0833447	0.0938716	0.099733							0.0755329	0.124581	0.0197762	0.19605							0.0791247	0.183068	0.164357
0.312033	0.620491	0.170001	0.0662914	0.0892056								0.250348	0.301953	0.153721	0.0788326							0.0573316	0.131246	0.301992	0.141252							0.0770051	0.0725239	0.0858145	0.0976899							0.160353	0.111117	0.103061
0.342673	0.123104	0.143586	0.0355193	0.185315								0.191657	0.133886	0.17271	0.0411014							0.127662	0.0912951	0.124077	0.613093							0.0787761	0.104737	0.096905	0.111661							0.123949	0.0867209	0.0880291
0.154049	0.201643	0.148493	0.137163	0.347165								0.277263	0.357257	0.15401	0.0958483							0.113588	0.260328	0.178446	0.224797							0.127996	0.143388	0.0766562	0.02822							0.0638561	0.288295	0.303954
0.0270762	0.214771	0.126834	0.110331	0.142642								0.351763	0.122028	0.246955	0.203906							0.172536	0.110091	0.366515	0.129013							0.0263983	0.0383347	0.136364	0.217546							0.0845071	0.185653	0.268881
0.23739	0.118953	0.0503583	0.188592	0.168442								0.108132	0.244726	0.110441	0.1613							0.35676	0.0760586	0.115801	0.240043							0.181673	0.0439635	0.1708	0.181409							0.991766	0.0444765	0.22753
0.175054	0.283732	0.0474644	0.0842165	0.225359								0.227285	0.167893	0.196968	0.185138							0.280394	0.213591	0.0910238	0.0571399							0.128306	0.0299146	0.250715	0.104323							0.283051	0.0693134	0.347572
0.2275	0.301227	0.080692	0.0604761	0.0446769								0.181487	0.212822	0.13765	0.177784							0.388266	0.224057	0.24225	0.105674							0.053831	0.0662809	0.132134	0.0812471							0.12935	0.106653	0.303064
0.183648	0.188317	0.190904	0.070639	0.0923745								0.091147	0.0640847	0.130534	0.198574							0.249265	0.144069	0.155543	0.0903174							0.0939038	0.0726414	0.064925	0.408067							0.0953925	0.148064	0.166241
0.146817	0.0548023	0.162413	0.0932549	0.349976								0.376893	0.111826	0.153402	0.102728							0.141466	0.0452138	0.243247	0.258763							0.142865	0.0324544	0.038591	0.0956868							0.119467	0.104423	0.110055
0.115689	0.251448	0.0620028	0.284695	0.0687141								0.0730433	0.162407	0.132565	0.247312							0.170107	0.189844	0.0296463	0.0791531							0.275228	0.0818722	0.0343001	0.895869							0.00836744	0.0787868	0.102973
0.0684487	0.112755	0.15401	0.11282	0.0989553								0.259966	0.13188	0.0438573	0.040382							0.190873	0.142176	0.110313	0.208308							0.209169	0.0277331	0.305244	0.0705619							0.13889	0.042736	0.152032
0.0466431	0.109609	0.0696495	0.0945719	0.0880172								0.115663	0.204855	0.0880752	0.165151							0.18909	0.14587	0.209007	0.207829							0.230116	0.0594073	0.0692953	0.0845446							0.104161	0.166022	0.017314
0.270564	0.173613	0.233334	0.0931368	0.0924395								0.100085	0.250415	0.207979	0.192501							0.196291	0.171612	0.198309	0.212002							0.221126	0.366856	0.162682	0.0331233							0.135957	0.169672	0.0869589
0.0552503	0.13601	0.227781	0.140546	0.23834								0.194074	0.198415	0.182945	0.0207489							0.147136	0.181829	0.161158	0.169991							0.134672	0.127974	0.227879	0.312448							0.280809	0.0511821	0.037359
0.0618416	0.483119	0.0544499	0.121668	0.147283								0.11384	0.22705	0.179558	0.0320242							0.360683	0.0652114	0.274761	0.0779222							0.206506	0.130657	0.323178	0.0417793							0.170786	0.0698885	0.16118
0.236909	0.17522	0.110356	0.0770474	0.121525								0.163549	0.200536	0.313455	0.126036							0.17824	0.111137	0.107154	0.168409							0.159492	0.394653	0.219855	0.176416							0.15159	0.260189	0.271534
0.183709	0.268548	0.0396699	0.134875	0.214491								0.10092	0.122639	0.160242	0.0442946							0.201838	0.162522	0.126792	0.181156							0.0235771	0.127216	0.165195	0.694487							0.158349	0.223933	0.19433
0.116779	0.118463	0.103527	0.128999	0.211254								0.158559	0.28195	0.17195	0.215748							0.0601109	0.0932158	0.355505	0.348242							0.0374289	0.22362	0.0123542	0.0400373							0.137423	0.0933003	0.113448
0.337988	0.0862177	0.121157	0.70082	0.150163								0.183977	0.186218	0.973783	0.210386							0.0782272	0.0437349	0.360708	0.15089							0.122941	0.0618108	0.164972	0.136452							0.0630617	0.161862	0.105267
0.1356	0.390784	0.124989	0.118702	0.126083								0.120638	0.194496	0.0928922	0.0369132							0.0486526	0.355889	0.190042	0.0456076							0.086471	0.121177	0.122603	0.147325							0.0733008	0.0349525	0.112357
0.0930694	0.22061	0.45158	0.0791123	0.446181								0.178665	0.211618	0.07667	0.0232497							0.0544024	0.162889	0.387593	0.18553							0.0348262	0.094552	0.141449	0.0743307							0.0986166	0.13774	0.215127
0.0618862	0.17782	0.0812331	0.171916	0.141723								0.0650785	0.077364	0.0515847	0.266332							0.0532917	0.0646105	0.280247	0.159091							0.0862064	0.115097	0.621702	0.0912828							0.145357	0.0462651	0.221619
0.297362	0.0596356	0.195648	0.0704317	0.116606								0.0865593	0.121799	0.213535	0.238863							0.203658	0.149274	0.0448135	0.21037							0.270816	0.249274	0.0928583	0.0535457							0.0293338	0.193173	0.197555
0.159354	0.163454	0.412246	0.11551	0.167993								0.127941	0.1627	0.0714821	0.189474							0.190634	0.138389	0.102301	0.241522							0.0568999	0.238579	0.0342657	0.0601792							0.0852252	0.164147	0.0289503
0.139562	0.504118	0.184799	0.137628	0.197544								0.151023	0.106883	0.200679	0.0478617							0.145535	0.139471	0.0880004	0.272698							0.262387	0.26676	0.0345545	0.20004							0.155215	0.0985943	0.0670539
0.0529463	0.13805	0.183752	0.142055	0.0308188								0.322494	0.194804	0.0563332	0.17986							0.0263809	0.0717246	0.198511	0.1481							0.166524	0.0843518	0.121977	0.233298							0.0338512	0.0992459	0.0193203
0.0808297	0.066867	0.171707	0.185793	0.257342								0.102119	0.219135	0.110456	0.0834947							0.210497	0.144745	0.0402314	0.225611							0.0597368	0.0402559	0.0805008	0.153003							0.0420516	0.165112	0.066183
0.160386	0.207131	0.10497	0.109863	0.0533422								0.217852	0.0767555	0.133296	0.195132							0.197726	0.168841	0.130088	0.150691							0.0157662	0.0361468	0.11612	0.0539029							0.124842	0.10101	0.0801354
0.185236	0.203349	0.0994287	0.204815	0.713537								0.181228	0.016821	0.0826534	0.247762							0.133256	0.145574	0.292979	0.224456							0.0620122	0.0461297	0.0149984	0.0676835							0.10607	0.16468	0.0702292
0.0189818	0.0877796	0.236745	0.241452	0.1135								0.223452	0.162909	0.149798	0.0326477							0.140618	0.126158	0.0233272	0.234931							0.0305743	0.259806	0.0241692	0.0176022							0.109617	0.269858	0.0867452
0.212278	0.0701491	0.137393	0.69801	0.189342								0.181639	0.761604	0.0323448	0.0801358							0.0929253	0.289644	0.0242906	0.186822							0.0940845	0.102895	0.0396938	0.172851							0.0734136	0.197552	0.168329
0.105483	0.237039	0.165379	0.204401	0.221161								0.0865713	0.112651	0.111078	0.0857618							0.0979179	0.0813981	0.190559	0.404462							0.0563438	0.102153	0.0914038	0.133739							0.0711743	0.0824307	0.0472548
0.0548225	0.246253	0.0766556	0.075908	0.20142								0.637568	0.140394	0.0275226	0.156562							0.131212	0.0695377	0.292692	0.0880066							0.0421873	0.172314	0.0445084	0.320854							0.0517806	0.101119	0.0753955
0.228981	0.0934437	0.137013	0.130586	0.0779463								0.248071	0.183815	0.0322185	0.137958							0.108233	0.250149	0.173176	0.326942							0.0566938	0.0652901	0.24854	0.143705							0.189218	0.0971342	0.097346
0.655989	0.10883	0.173403	0.0609398	1.01241								0.278459	0.0557163	0.132496	0.218584							0.0309757	0.170448	0.0789912	0.148753							0.0603008	0.0723012	0.0595711	0.285452							0.136148	0.206988	0.104533
0.128594	0.0360621	0.049816	0.188475	0.243469								0.243799	0.267527	0.0877803	0.178352							0.29287	0.036879	0.149552	0.142357							0.129618	0.0425716	0.0854267	0.022808							0.0983129	0.0653199	0.134707
0.0630765	0.0462722	0.0485925	0.100948	0.32093								0.1835	0.0891325	0.216109	0.0505746							0.0625541	0.0666345	0.303136	0.884642							0.182811	0.0594172	0.184103	0.0943779							0.0156063	0.209681	0.203438
0.315313	0.0444322	0.0816989	0.092744	0.165943								0.0710329	0.45708	0.363096	0.199773							0.251853	0.0511378	0.133199	0.232956							0.162346	0.0375535	0.0589754	0.122493							0.100923	0.018445	0.0927842
0.17445	0.248261	0.110928	0.213594	0.118253								0.0627599	0.329006	0.293489	0.256381							0.34551	0.0479062	0.230696	0.0878244							0.155156	0.0420961	0.038845	0.0699682							0.111813	0.141019	0.120651
0.291938	0.119319	0.285213	0.0597885	0.209904								0.10435	0.108635	0.115904	0.040834							0.122454	0.0576388	0.233012	0.0695099							0.179075	0.102053	0.171357	0.0340778							0.102332	0.0274562	0.226029
0.112771	0.11065	0.366852	0.11617	0.178259								0.0070689	0.115063	0.235032	0.0225738							0.201322	0.0459881	0.148959	0.0891732							0.112439	0.0546598	0.169876	0.135679							0.0289731	0.0984994	0.182018
0.292497	0.0971899	0.207371	0.75093	0.176757								0.0316465	0.447669	0.245915	0.0946671							0.219638	0.0733226	0.144432	0.65732							0.150578	0.174924	0.0891974	0.148623							0.180572	0.1249	0.207105
0.0343918	0.201748	0.104011	0.0107281	0.0640026								0.0244812	0.363011	0.0270855	0.12413							0.168746	0.0453602	0.159672	0.194106							0.116241	0.149505	0.0903903	0.08667							0.0440593	0.0531751	0.112636
0.144507	0.150053	0.145362	0.0472424	0.166959								0.0301945	0.294985	0.109551	0.0851706							0.699346	0.134101	0.0330996	0.209852							0.041306	0.0724164	0.0100005	0.0615624							0.0694449	0.14891	0.0938551
0.0825845	0.184539	0.0693892	0.0890604	0.230468								0.0539303	0.294559	0.13687	0.0481653							0.270974	0.277492	0.0743217	0.0320378							0.0735909	0.104602	0.0935762	0.0257512							0.0985957	0.0241847	0.343173
0.333982	0.154596	0.0429806	0.320309	0.204258								0.0806798	0.148795	0.07729	0.0706557							0.240614	0.0844097	0.0790496	0.03028							0.0567211	0.0932762	0.0606748	0.10445							0.0290228	0.0403102	0.156531
0.0955926	0.301904	0.106411	0.0416325	0.035199								0.047623	0.129215	0.0346579	0.15683							0.245569	0.181163	0.103021	0.0254198							0.0407455	0.163232	0.0394814	0.27426							0.0160021	0.0823505	0.125123
0.1905	0.286824	0.28864	0.0654458	0.0698915								0.218837	0.0839931	0.0855805	0.107115							0.146153	0.288153	0.0253171	0.0723325							0.0984975	0.128874	0.435465	0.230225							0.0823642	0.183558	0.02161
0.146444	0.288736	0.165169	0.361501	0.223163								0.158029	0.0930957	0.0681354	0.0430792							0.0749539	0.0920024	0.112691	0.0214426							0.11859	0.102994	0.0628801	0.0604649							0.150729	0.0380318	0.112436
0.392137	0.119077	0.161859	0.212779	0.0341008								0.225294	0.122935	0.0714093	0.283609							0.0916828	0.22638	0.260485	0.0503934							0.0543637	0.0707115	0.137147	0.0758373							0.163017	0.08095	0.20426
0.114878	0.17485	0.195825	0.910959	0.267965								0.236481	0.0137913	0.604537	0.285447							0.0633459	0.0540483	0.0952461	0.0550662							0.206507	0.0419184	0.229424	0.0321466							0.0585774	0.107235	0.06235
0.142527	0.0863961	0.21772	0.145382	0.125712								0.0777386	0.463216	0.119148	0.0838775							0.777361	0.158983	0.145142	0.166441							0.0566995	0.0380342	0.05528	0.145494							0.116745	0.229829	0.0856657
0.253908	0.139017	0.339679	0.0808845	0.102083								0.0371716	0.172809	0.054778	0.271435							0.462917	0.121122	0.0436113	0.101532							0.128169	0.141097	0.228311	0.18135							0.0665122	0.0423213	0.245324
0.202528	0.21197	0.269115	0.20167	0.0929088								0.099403	0.170268	0.0160591	0.14424							0.219097	0.131702	0.192468	0.141099							0.0665475	0.156207	0.0140103	0.176362							0.205678	0.083738	0.173424
0.180872	0.179657	0.237974	0.151001	0.272824								0.0623165	0.142723	0.0545525	0.0555232							0.0890073	0.405177	0.173422	0.0199621							0.214217	0.250096	0.171588	0.0844875							0.102663	0.199576	0.215674
0.10682	0.0948537	0.104573	0.153978	0.195458								0.0665513	0.0446951	0.0449084	0.229331							0.0928516	0.174054	0.203467	0.0796277							0.185159	0.438853	0.116471	0.0441057							0.025655	0.0227119	0.253624
0.0898919	0.219872	0.121374	0.0553058	0.0189423								0.239331	0.172814	0.0895879	0.297846							0.0578446	0.387897	0.0983772	0.220887							0.256883	0.263727	0.055274	0.0273369							0.254096	0.033601	0.155354
0.106715	0.0843193	0.334153	0.0948687	0.111265								0.0142055	0.140516	0.115339	0.16391							0.109573	0.0751837	0.210027	0.143766							0.0962858	0.186802	0.0198916	0.0972667							0.123621	0.098862	0.0152691
0.0661324	0.113256	0.0984802	0.0506589	0.110411								0.0615949	0.195588	0.186021	0.0960868							0.0889973	0.0645164	0.0274107	0.0185475							0.164945	0.0446629	0.190987	0.172397							0.085959	0.0487781	0.234822
0.0452931	0.0790903	0.0782812	0.0630462	0.567634								0.400758	0.200238	0.0222827	0.275044							0.0222498	0.0386234	0.193165	0.327784							0.130086	0.0685719	0.242169	0.187671							0.166482	0.0782338	0.171054
0.170302	0.0835504	0.301261	0.278544	0.0455604								0.110023	0.203659	0.167228	0.214103							0.0569137	0.0901179	0.135805	0.119068							0.107752	0.101483	0.00617929	0.197243							0.142088	0.295196	0.0454232
0.193455	0.275393	0.125017	0.214186	0.0974987								0.0949671	0.134853	0.0428696	0.0800025							0.0769514	0.0294727	0.368687	0.150324							0.0808033	0.17184	0.129163	0.0657706							0.0474747	0.430467	0.108003
0.365612	0.148343	0.0546062	0.160946	0.160084								0.136749	0.135772	0.250627	0.0645346							0.0194991	0.195095	0.240634	0.240326							0.116818	0.202015	0.160317	0.238033							0.0730825	0.289553	0.251394
0.188884	0.145594	0.0747244	0.166928	0.145137								0.0376455	0.130723	0.0774453	0.0257129							0.0589136	0.58703	0.0920263	0.0614621							0.0418592	0.135783	0.0305919	0.123155							0.0650909	0.296167	0.044674
0.131873	0.408724	0.0295618	0.111231	0.183								0.242013	0.189547	0.115544	0.0972867							0.104091	0.113042	0.540089	0.153048							0.13377	0.14975	0.0421992	0.301712							0.0888861	0.0968909	0.239258
0.184605	0.0519644	0.217421	0.619321	0.173884								0.1413	0.333417	0.0898209	0.175846							0.348701	0.290263	0.285412	0.560981							0.0959834	0.0460476	0.112447	0.194889							0.0495992	0.0578387	0.135523
0.216778	0.0615932	0.161848	0.116123	0.0684103								0.233505	0.312209	0.175068	0.36321							0.0476789	0.087792	0.128675	0.423296							0.205343	0.0319063	0.00698716	0.0183672							0.0875544	0.046379	0.0125136
0.234732	0.0498326	0.0813185	0.12122	0.198814								0.0380794	0.138331	0.174959	0.125596							0.117909	0.0317306	0.0884958	1.00792							0.122508	0.125861	0.250658	0.393462							0.098494	0.0289229	0.0640112
0.18397	0.192555	0.154273	0.0316126	0.20366								0.0873248	0.315385	0.149814	0.328462							0.29996	0.265908	0.152333	0.200806							0.0898984	0.0433191	0.111783	0.23659							0.152459	0.0445972	0.0501236
0.09118	0.0666762	0.225247	0.185208	0.267672								0.0599878	0.364043	0.439565	0.145127							0.315216	0.22663	0.0973775	0.0780581							0.0640014	0.0732054	0.0880172	0.226221							0.200265	0.120256	0.127031
0.0392774	0.289659	0.201377	0.052732	0.116968								0.326745	0.0433738	0.107178	0.124351							0.0295549	0.148185	0.546241	0.0656281							0.0542176	0.0792494	0.0986402	0.0392503							0.181397	0.127382	0.0775498
0.104188	0.831792	0.062751	0.28744	0.142225								0.0974799	0.171103	0.75421	0.0799552							0.0238959	0.0559157	0.097514	0.122808							0.141307	0.0859864	0.273972	0.933635							0.250708	0.0949011	0.099924
0.0507162	0.134893	0.174862	0.0892874	0.283806								0.138684	0.171886	0.08839	0.169499							0.234371	0.12942	0.0457557	0.204344							0.0129058	0.0861425	0.792457	0.122973							0.131673	0.0179182	0.0358307
0.127021	0.12425	0.100441	0.362753	0.060673								0.181406	0.113883	0.027359	0.218413							0.149939	0.242647	0.219577	0.194627							0.110348	0.145023	0.111101	0.0640158							0.0837337	0.174625	0.103087
0.058431	0.261946	0.075531	0.208226	0.118662								0.114853	0.206612	0.142058	0.388528							0.117137	0.163192	0.151732	0.104926							0.225446	0.109736	0.0807282	0.0205601							0.0983916	0.177692	0.115894
0.379161	0.107599	0.190963	0.303838	0.104448								0.0271728	0.105752	0.129029	0.122473							0.390506	1.08519	0.312768	0.136449							0.0134653	0.187303	0.269476	0.0750356							0.103843	0.104361	0.161903
0.317036	0.140955	0.0759494	0.179926	0.277037								0.185815	0.175789	0.20609	0.179974							0.193138	0.0803252	0.220708	0.15949							0.223073	0.161153	0.152836	0.596956							0.0687928	0.190689	0.250935
0.104111	1.05621	0.0989962	0.233983	0.0452694								0.169848	0.110394	0.175912	0.0441914							0.133837	0.330613	0.182924	0.281608							0.0977163	0.0385986	0.0913146	0.046454							0.0750022	0.0773289	0.176319
0.127636	0.141877	0.0893481	0.829852	0.147825								0.16998	0.202553	0.0921191	0.15409							0.279865	0.282012	0.223723	0.305483							0.0766489	0.0338758	0.0986238	0.0911175							0.0650615	0.0511212	0.147592
0.068618	0.165805	0.148961	0.425103	0.186968								0.11082	0.279014	0.0429358	0.213426							0.0939419	0.324053	0.13746	0.330835							0.0731312	0.325826	0.0468588	0.171609							0.0385926	0.102265	0.163282
0.498285	0.294321	0.073174	0.107142	0.126874								0.0738868	0.189462	0.208609	0.290166							0.0915821	0.0378748	0.186245	0.0390203							0.0720435	0.0984783	0.0751575	0.0599008							0.159693	0.00836161	0.0373309
0.153555	0.0427429	0.161342	0.129854	0.0412842								0.0960337	0.332333	0.148196	0.266502							0.133754	1.06059	0.0755939	0.0557872							0.18126	0.133821	0.32657	0.0840254							0.0122671	0.145378	0.100418
0.0766678	0.159351	0.0898185	0.212872	0.161994								0.115691	0.145435	0.274355	0.110805							0.205775	0.145667	0.115282	0.0610697							0.117861	0.163936	0.0388918	0.0465496							0.21081	0.152067	0.156036
0.150404	0.0354377	0.0575281	0.118642	0.145066								0.221678	0.0994003	0.171772	0.188314							0.203491	0.0938164	0.104491	0.0837152							0.39732	0.131439	0.0765065	0.0443317							0.174037	0.0809182	0.17149
0.145375	0.212815	0.1083	0.0804393	0.044744								0.0618012	0.234488	0.157139	0.155903							0.10445	0.2514	0.17555	0.0542692							0.209692	0.219286	0.0986674	0.0699818							0.0910569	0.251442	0.0316016
0.0469804	0.118175	0.321569	0.151226	0.0792861								0.126477	0.152855	0.163423	0.115542							0.34718	0.333706	0.110474	0.0193474							0.262237	0.10801	0.0238361	0.101771							0.0992359	0.128826	0.14986
0.124839	0.123128	0.218887	0.0766422	0.0588436								0.198233	0.225579	0.352064	0.124027							0.0438634	0.31699	0.145983	0.289185							0.0688582	0.00589666	0.0830727	0.0645489							0.0802406	0.143943	0.208799
0.203508	0.216935	0.218448	0.20099	0.249934								0.0450811	0.231723	0.329549	0.0942546							0.279876	0.19463	0.142156	0.0892777							0.0613213	0.095363	0.0419163	0.0623358							0.0457932	0.153901	0.0748917
0.061781	0.187179	0.0592367	0.113675	0.185023								0.292363	0.250506	0.0500657	0.0235144							0.227479	0.174684	0.133689	0.170141							0.095172	0.197027	0.114843	0.118602							0.127157	0.341833	0.0419414
0.0536127	0.115673	0.376348	0.137769	0.123033								0.116955	0.189039	0.146845	0.0985756							0.149186	0.350237	0.0146722	0.133891							0.0595646	0.178133	0.0417849	0.133261							0.135951	0.0902929	0.237598
0.134719	0.0835296	0.147406	0.151369	0.208368								0.160725	0.344172	0.177669	0.164512							0.0241682	0.453481	0.157988	0.0848055							0.192932	0.0621889	0.111807	0.100346							0.126262	0.338548	0.0702458
0.254893	0.0975571	0.12347	0.609962	0.204583								0.152787	0.16515	0.0928019	0.118292							0.658308	0.270657	0.404389	0.30184							0.0646663	0.133723	0.0305522	0.181175							0.113994	0.0529904	0.125125
0.217303	0.152029	0.179329	0.186264	0.143838								0.0540033	0.32096	0.22614	0.156828							0.0682284	0.168786	0.268684	0.244316							0.126439	0.0353956	0.108582	0.0747317							0.299658	0.04042	0.0579409
0.16519	0.344414	0.10408	0.0391748	0.261029								0.149474	0.0332327	0.0459973	0.0983514							0.148788	0.240108	0.289586	0.248747							0.217619	0.0894461	0.00221263	0.112121							0.401367	0.191812	0.0658154
0.157996	0.217534	0.0641828	0.247078	0.165364								0.0276048	0.0794993	0.141915	0.659554							0.157035	0.0487546	0.144152	0.145212							0.119572	0.105549	0.0724362	0.231709							0.105791	0.242518	0.0764902
0.164477	0.198434	0.235168	0.0971467	0.114827								0.225039	0.0402892	0.252503	0.0673168							0.132942	0.405335	0.214404	0.150535							0.134945	0.127885	0.0968887	0.0585042							0.319465	0.155867	0.145713
0.149386	0.0752629	0.209497	0.108911	0.130103								0.111788	0.180481	0.251166	0.138695							0.38923	0.112014	0.0970424	0.267975							0.206425	0.0642318	0.0968181	0.0719842							0.108112	0.236228	0.184921
0.22912	0.0305244	0.109037	0.0622332	0.184586								0.206014	0.328672	0.0493504	0.0662702							0.135777	0.273682	0.115031	0.282271							0.301882	0.0830831	0.0340267	0.0817139							0.182518	0.0587653	0.0676618
0.0752125	0.0972473	0.132353	0.106284	0.19485								0.226333	0.0939566	0.136518	0.242824							0.0510357	0.0965879	0.220866	0.11256							0.19978	0.0833908	0.19684	0.0727723							0.051776	0.0147333	0.0759482
0.270034	0.117047	0.228974	0.161672	0.124921								0.279702	0.20799	0.138727	0.211515							0.2174	0.137883	0.0352978	0.0772599							0.202805	0.044834	0.21534	0.0786009							0.122602	0.0493798	0.125377
0.214255	0.130411	0.064912	0.0886779	0.309115								0.256208	0.224876	0.0649305	0.306535							0.162895	0.0748078	0.183271	0.0779625							0.34371	0.179311	0.214713	0.0239498							0.0454075	0.159927	0.0186791
0.0847266	0.394332	0.160996	0.218833	0.182395								0.0249108	0.0597928	0.28429	0.343569							0.0899055	0.175871	0.0422984	0.389255							0.343883	0.292473	0.260193	0.164917							0.153359	0.0263704	0.08021
0.461693	0.162961	0.249843	0.377534	0.0161462								0.0786413	0.128433	0.113418	0.0551591							0.214573	0.0490009	0.019678	0.324967							0.174409	0.181117	0.0775539	0.195575							0.0536168	0.0370524	0.205755
0.131825	0.15134	0.0863353	0.149449	0.168006								0.159591	0.285559	0.114479	0.0223218							0.0714998	0.0544955	0.137263	0.157129							0.0897553	0.150582	0.0947865	0.124477							0.166661	0.173433	0.0953151
0.211471	0.167341	0.116704	0.139791	0.230561								0.142629	0.436312	0.424376	0.284393							0.144331	0.132194	0.165102	0.157309							0.144423	0.150703	0.0340471	0.059503							0.166362	0.0755089	0.193268
0.101774	0.0866516	0.165032	0.070827	0.159825								0.270181	0.0760256	0.10801	0.886216							0.102399	0.0910043	0.130742	0.208277							0.252306	0.0756378	0.233319	0.249671							0.0424286	0.120012	0.196231
0.208215	0.226845	0.258611	0.0658145	0.335283								0.0745058	0.099725	0.0901398	0.161143							0.188674	0.0963466	0.0296317	0.105738							0.116898	0.123677	0.077061	0.0672886							0.0772408	0.132513	0.0550373
0.0778407	0.0733809	0.0531617	0.0317398	0.128167								0.0974741	0.204872	0.0944592	0.118925							0.169875	0.178583	0.0897696	0.0440646							0.0961469	0.0392127	0.11082	0.0815218							0.0790259	0.187528	0.0657295
0.193835	0.175575	0.123301	0.167267	0.0978453								0.0319581	0.27152	0.197569	0.418357							0.14292	0.0218188	0.129467	0.0393429							0.0642117	0.100935	0.10719	0.25835							0.14457	0.0437794	0.0516447
0.0629381	0.136003	0.159616	0.104783	0.150251								0.21059	0.0636701	0.145978	0.16102							0.11128	0.0231059	0.192445	0.136567							0.110334	0.104797	0.0248003	0.217964							0.0356582	0.0276282	0.117737
0.193905	0.153298	0.11527	0.238581	0.131332								0.113291	0.228709	0.0354791	0.152336							0.0593629	0.0508552	0.027281	0.0580535							0.0661549	0.275185	0.061683	0.0543831							0.0495448	0.0384066	0.184837
0.0856069	0.344114	0.267897	0.122736	0.164454								0.152088	0.13391	0.114687	0.232519							0.405644	0.124052	0.00738872	0.021685							0.418429	0.0384627	0.0702284	0.0610354							0.0502283	0.101408	0.135884
0.359017	0.140901	0.0899104	0.204065	0.152633								0.244966	0.293162	0.030125	0.0278311							0.286617	0.0601966	0.0741066	0.0710606							0.0288882	0.166012	0.0494875	0.0855354							0.132081	0.0523478	0.186239
0.102582	0.189141	0.116157	0.224045	0.32744								0.387609	0.0751853	0.070625	0.239409							0.17878	0.223942	0.309113	0.115574							0.157871	0.158055	0.0739014	0.0959914							0.0252274	0.0641489	0.213927
0.0872454	0.821071	0.179539	0.331907	0.260552								0.156933	0.105984	0.107309	0.174951							0.190972	0.13491	0.169738	0.0789674							0.1655	0.0420453	0.141168	0.0777824							0.110504	0.0725085	0.0991729
0.0410883	0.0717684	0.101354	0.182332	0.212238								0.280176	0.204489	0.178862	0.0692023							0.0995791	0.243045	0.225527	0.075097							0.0898916	0.182757	0.0650474	0.202394							0.107558	0.159483	0.0407105
0.223296	0.170288	0.0830762	0.199751	0.108663								0.113912	0.0886315	0.278956	0.173291							0.0657754	0.255348	0.00677487	0.0737358							0.157581	0.243135	0.26831	0.105261							0.107553	0.0940431	0.130186
0.217805	0.241307	0.182332	0.143807	0.412064								0.0899723	0.135015	0.0979622	0.218827							0.192757	0.127925	0.303723	0.0804623							0.0629862	0.179197	0.12367	0.141							0.0295602	0.0561782	0.0864902
0.185807	0.138846	0.126444	0.145309	0.318396								0.0997925	0.18217	0.0846855	0.245595							0.0498561	0.238562	0.221208	0.0803223							0.201222	0.136057	0.0947598	0.151711							0.0322801	0.132198	0.0628905
0.0861455	0.174049	0.119285	0.130769	0.218144								0.332015	0.121387	0.249098	0.207789							0.11483	0.102518	0.11212	0.0639023							0.0636512	0.0867987	0.235684	0.166585							0.0515382	0.0803142	0.0502858
0.147896	0.194918	0.197132	0.124646	0.12852								0.112545	0.127585	0.26983	0.151809							0.0816139	0.310927	0.123128	0.189676							0.138928	0.119048	0.185142	0.164594							0.0593588	0.124062	0.118287
0.184981	0.102274	0.224219	0.142762	0.124947								0.298003	0.125548	0.233441	0.14131							0.078022	0.311329	0.125828	0.0946723							0.174493	0.0204765	0.126087	0.137894							0.837077	0.206275	0.0702102
0.134553	0.0271368	0.0844518	0.150786	0.144431								0.108795	0.313614	0.106269	0.122408							0.0438907	0.185251	0.212815	0.305865							0.0779527	0.0882681	0.11831	0.196955							0.147572	0.112819	0.0107796
0.057522	0.306979	0.290935	0.523555	0.27083								0.22128	0.185032	0.877624	0.181053							0.0805791	0.120523	0.256887	0.203786							0.132848	0.105761	0.0553534	0.119018							0.0723467	0.100332	0.0567021
0.214941	0.0877434	0.121842	0.164242	0.217894								0.263298	0.178208	0.121594	0.315364							0.118434	0.214813	0.354795	0.0767497							0.130741	0.172248	0.043296	0.0850663							0.208323	0.069589	0.0949515
0.195584	0.160193	0.15185	0.183515	0.0785334								0.105313	0.471772	0.144482	0.229543							0.0622743	0.0327013	0.110798	0.230123							0.249205	0.177123	0.186052	0.238522							0.0450358	0.0780524	0.158314
0.0887035	0.126341	0.0940228	0.131792	0.102239								0.185017	0.167008	0.0769989	0.0967889							0.205911	0.312695	0.0729326	0.14298							0.138183	0.122464	0.0766845	0.0194865							0.113911	0.0343898	0.170368
0.0185368	0.255442	0.104145	0.22391	0.140603								0.0428091	0.179235	0.0811988	0.0844402							0.182942	0.247192	0.0322372	0.073234							0.146526	0.0390832	0.216111	0.133647							0.0410165	0.0807777	0.0609055
0.115515	0.0788755	0.165691	0.0700728	0.103294								0.330498	0.0507236	0.276864	0.0727624							0.0423812	0.621576	0.0115959	0.154413							0.0389967	0.0839274	0.588042	0.0337589							0.0506324	0.0869713	0.152248
0.153441	0.148948	0.148444	0.203242	0.151973								0.116352	0.271096	0.899318	0.318564							0.0811662	0.242779	0.116642	0.232782							0.140987	0.0996572	0.200532	0.126589							0.124755	0.0564219	0.0651044
0.0702748	0.227222	0.146374	0.0938813	0.195312								0.0710661	0.507993	0.0688861	0.171846							0.0669764	0.196582	0.0216167	0.168101							0.25312	0.26922	0.0352649	0.282976							0.0761095	0.0269645	0.060185
0.109865	0.248052	0.0600997	0.0584951	0.295787								0.0934143	0.181168	0.196795	0.0430596							0.422348	0.173159	0.115208	0.0983399							0.0272713	0.155623	0.204232	0.238917							0.0297837	0.243108	0.0201382
0.858356	0.135754	0.0830289	0.172663	0.120947								0.300442	0.00723266	0.238189	0.157932							0.0982397	0.049063	0.027838	0.136604							0.0745982	0.257867	0.907483	0.140228							0.0639472	0.0546075	0.198191
0.220347	0.128765	0.0913508	0.126121	0.267643								0.265457	0.073584	0.0761145	0.0694422							0.111637	0.0746027	0.170207	0.0213704							0.0941724	0.0699179	0.156673	0.315497							0.0617615	0.100678	0.146326
0.197433	0.345047	0.219895	0.0470037	0.079321								0.17343	0.0762735	0.253178	0.0718136							0.151711	0.132985	0.17629	0.18694							0.088649	0.279402	0.976871	0.0855322							0.195799	0.0794078	0.335547
0.193081	0.127714	0.168473	0.451057	0.10682								0.165059	0.0368088	0.0354651	0.309719							0.158225	0.239443	0.147639	0.101477							0.107561	0.065132	0.160152	0.0549453							0.0611221	0.0119864	0.153489
0.0529399	0.201254	0.00461036	0.0537798	0.241945								0.0353108	0.0863318	0.103366	0.378239							0.0177507	0.251251	0.0934422	0.19088							0.0194133	0.196224	0.0578698	0.195259							0.158807	0.108194	0.0849542
0.215844	0.0629121	0.167726	0.36778	0.141665								0.0871777	0.0216842	0.213042	0.163247							0.197055	0.126886	0.0372889	0.059402							0.291501	0.387183	0.0996159	0.0872231							0.204309	0.107817	0.0959018
0.109973	0.342371	0.111371	0.0993927	0.104187								0.147761	0.0347197	0.187968	0.107957							0.147506	0.0495489	0.163582	0.0570877							0.0827511	0.169135	0.285554	0.40002							0.111877	0.107471	0.0746579
0.162378	0.0568697	0.0905879	0.316196	0.260368								0.0907228	0.0780301	0.182432	0.0448351							0.0111784	0.116696	0.0627696	0.0223591							0.0147394	0.240537	0.0679028	0.0552558							0.040932	0.203394	0.0276862
0.250329	0.145237	0.215	1.07349	0.0948653								0.272034	0.0490608	0.0619984	0.182056							0.324032	0.165811	0.046671	0.114027							0.055681	0.126127	0.0650692	0.142487							0.0670893	0.141565	0.0161955
0.210295	0.153958	0.175316	0.0858251	0.202346								0.133919	0.0787246	0.164218	0.111171							0.276285	0.234344	0.14181	0.160539							0.0886122	0.063834	0.0804769	0.129612							0.142028	0.0622444	0.107573
0.364353	0.0465507	0.267428	0.286707	0.118077								0.169923	0.163708	0.0825091	0.28822							0.0808448	0.0977635	0.0255099	0.0442101							0.137033	0.136794	0.295946	0.174736							0.0552322	0.275508	0.0654653
0.227401	0.268569	0.833584	0.122722	0.0533513								0.0115187	0.175462	0.157182	0.191381							0.253677	0.263863	0.0359349	0.212288							0.294042	0.0474431	0.0366332	0.155617							0.182727	0.247312	0.134691
0.920145	0.133952	0.0139816	0.0476739	0.781815								0.103286	0.0196712	0.135281	0.364014							0.252891	0.211033	0.179692	0.211277							0.184536	0.135064	0.157256	0.0727092							0.173117	0.17377	0.173388
0.169721	0.191774	0.092029	0.0968138	0.231427								0.0467376	0.120946	0.2418	0.254337							0.17477	0.0774858	0.0998325	0.0812787							0.0885712	0.0692764	0.077387	0.0890579							0.162729	0.184802	0.145977
0.197502	0.073106	0.210283	0.0708836	0.295179								0.127263	0.0448014	0.285978	0.031266							0.152116	0.0361327	0.0422221	0.137649							0.194909	0.111413	0.0183901	0.116704							0.0703055	0.203336	0.200189
0.469874	0.211183	0.232209	0.0994797	0.350127								0.153527	0.0502122	0.0594763	0.301238							0.0398126	0.129627	0.202848	0.0409158							0.350832	0.0350401	0.0532902	0.323773							0.0233777	0.0985185	0.239429
0.0820784	0.1336	0.162631	0.0802289	0.291483								0.662282	0.0889489	0.28591	0.0747806							0.192756	0.194816	0.123222	0.0460183							0.109283	0.150113	0.0106559	0.135316							0.11575	0.0562848	0.168521
0.00858081	0.218171	0.121568	0.235514	0.201892								0.0156087	0.0636981	0.0792858	0.169136							0.253129	0.14348	0.242263	0.327449							0.142933	0.227496	0.323104	0.217211							0.111235	0.125135	0.100062
0.106096	0.149305	0.0155505	0.138173	0.023488								0.110355	0.970778	0.159893	0.120578							0.0544108	0.0678287	0.119838	0.199607							0.0408403	0.269372	0.205417	0.0121091							0.0796704	0.186406	0.0651125
0.190688	0.245648	0.0873463	0.0928052	0.113099								0.0820705	0.100056	0.104474	0.0942833							0.344339	0.126545	0.0657485	0.10267							0.0709896	0.147498	0.166615	0.0255479							0.142228	0.147779	0.0295809
0.0342196	0.13666	0.241743	0.262962	0.0995722								0.353606	0.18703	0.199801	0.241501							0.107057	0.059129	0.212934	0.227098							0.138692	0.168325	0.22422	0.235342							0.168412	0.150311	0.098026
0.19985	0.142868	0.117479	0.157337	0.230914								0.0928801	0.153766	0.334499	0.14839							0.0921603	0.114618	0.1253	0.113697							0.150091	0.226366	0.289096	0.0778207							0.032607	0.296381	0.141417
0.0924432	0.214749	0.0996722	0.0445702	0.0975099								0.0943832	0.0330871	0.497796	0.0357283							0.0463257	0.131773	0.0474506	0.112526							0.0380764	0.174555	0.0604306	0.00342859							0.0451252	0.141353	0.0830171
0.27377	0.287573	0.19255	0.16862	0.0476203								0.25125	0.238518	0.0734154	0.197059							0.173243	0.0553317	0.506645	0.155191							0.0614103	0.17386	0.084012	0.0106966							0.0958443	0.0964188	0.0652065
0.0984472	0.178493	0.220348	0.0681564	0.276834								0.18429	0.408945	0.0948962	0.134533							0.068682	0.0307582	0.255872	0.138371							0.134632	0.0809323	0.145084	0.0286019							0.181624	0.0801352	0.0907375
0.176273	0.122349	0.0373363	0.297522	0.104441								0.153803	0.477861	0.118477	0.174939							0.0566518	0.314007	0.285412	0.0979945							0.113249	0.118383	0.14486	0.432267							0.18983	0.224134	0.105652
0.0747839	0.197805	0.188317	0.19944	0.159673								0.280613	0.316881	0.0329367	0.206818							0.205952	1.00559	0.0160979	0.254273							0.207155	0.0763185	0.075017	0.105219							0.130766	0.00715363	0.114468
0.303564	0.326509	0.0456651	0.307796	0.0450684								0.0637647	0.1465	0.365525	0.0407291							0.264585	0.187868	0.283521	0.728557							0.139655	0.178409	0.078008	0.146654							0.16889	0.057122	0.0703601
0.105286	0.0580094	0.332766	0.200834	0.216787								0.121767	0.121735	0.186262	0.0900125							0.230457	0.149764	0.161595	0.237274							0.189948	0.254117	0.121662	0.0218548							0.159072	0.169915	0.0457913
0.221832	0.125183	0.142389	0.162046	0.0956235								0.0468876	0.12049	0.256334	0.101741							0.0793173	0.127223	0.0732018	0.132327							0.194092	0.0665403	0.0883762	0.187825							0.0158898	0.0450734	0.0366028
0.0691179	0.083704	0.215997	0.00696237	0.168639								0.0997294	0.116054	0.0936756	0.0672963							0.0268657	0.0352059	0.0882174	0.259864							0.161715	0.0728701	0.032577	0.168621							0.181319	0.0388221	0.189777
0.114816	0.148212	0.0918821	0.0637766	0.334269								0.08716	0.0436007	0.170034	0.163414							0.0583308	0.106153	0.300549	0.0467456							0.134929	0.0869139	0.194544	0.0246702							0.142859	0.0928783	0.0830149
0.175389	0.149538	0.0171342	0.299219	0.452635								0.186614	0.179241	0.110142	0.322994							0.113713	0.0835308	0.0325447	0.0941079							0.177384	0.027267	0.113869	0.042084							0.249258	0.198988	0.115807
0.135768	0.0381888	0.245995	0.223749	0.228275								0.099835	0.197718	0.0883717	0.121726							0.184056	0.0796291	0.0761614	0.0436859							0.17435	0.158	0.256787	0.0629877							0.147491	0.0628124	0.126677
0.0608469	0.192774	0.173284	0.185101	0.018274								0.116438	0.0469812	0.186492	0.0259079							0.258214	0.175718	0.192338	0.104248							0.0656166	0.109948	0.145008	0.340066							0.124	0.0601504	0.175699
0.164688	0.124145	0.0904888	0.0376419	0.374711								0.0961099	0.0321023	0.0153194	0.0727341							0.171728	0.106828	0.064315	0.174984							0.129734	0.070084	0.0968877	0.102189							0.127515	0.0948855	0.412198
0.104473	0.260989	0.26999	0.0435311	0.0291648								0.126893	0.236007	0.267098	0.221792							0.298577	0.178759	0.0659938	0.221959							0.160976	0.10003	0.143398	0.0836983							0.0598471	0.238984	0.155878
0.0582005	0.223493	0.187821	0.157362	0.12444								0.321443	0.178789	0.107597	0.253856							0.0868335	0.0512167	0.0591754	0.218814							0.0951411	0.0330101	0.0398712	0.314992							0.118995	0.0930051	0.111332
0.0784057	0.280849	0.0617756	0.206123	0.0743538								0.29638	0.0969006	0.257484	0.321606							0.181789	0.271672	0.00799218	0.106666							0.105253	0.239977	0.219795	0.0884765							0.0779776	0.0929016	0.248761
0.158933	0.0453846	0.142712	0.144777	0.264377								0.0653623	0.0713551	0.281106	0.115559							0.127496	0.205242	0.096073	0.238334							0.201075	0.0233372	0.0296884	0.222468							0.048714	0.151855	0.174485
0.144626	0.0456459	0.103808	0.248147	0.279581								0.183799	0.728496	0.0955196	0.14958							0.244217	0.212203	0.0914537	0.208655							0.200712	0.193022	0.0406067	0.206624							0.0716509	0.267235	0.188328
0.339323	0.242031	0.135344	0.20258	0.0455311								0.106448	0.0755279	0.0451835	0.136229							0.233656	0.0206891	0.119724	0.0482698							0.100065	0.146036	0.0942536	0.167029							0.033173	0.139819	0.103903
0.263826	0.110419	0.264815	0.0380977	0.0978789								0.108833	0.185094	0.133604	0.190949							0.158061	0.143855	0.10255	0.399483							0.133733	0.0788166	0.064707	0.108036							0.0747729	0.0856784	0.375039
0.74527	0.21278	0.101489	0.118994	0.0832124								0.147201	0.140725	0.107087	0.127887							0.239441	0.316124	0.0302045	0.155033							0.058002	0.00723938	0.107227	0.115347							0.0566424	0.178765	0.107054
0.117693	0.093978	0.139701	0.211252	0.10548								0.11459	0.16295	0.191769	0.0686446							0.332868	0.196419	0.0450558	0.204883							0.204466	0.150932	0.0313261	0.121028							0.153681	0.421344	0.396911
0.072611	0.107697	0.196825	0.166808	0.129913								0.121955	0.0573571	0.165194	0.131053							0.177668	0.192258	0.0662357	0.153904							0.079195	0.0691828	0.0438788	0.0914051							0.0131177	0.0654533	0.030838
0.0701178	0.119684	0.0376014	0.320238	0.583438								0.168254	0.0650645	0.270473	0.0653195							0.105922	0.137029	0.307109	0.0855042							0.265254	0.241861	0.105009	0.118745							0.0780904	0.178409	0.228586
0.26964	0.196328	0.128792	0.382487	0.352252								0.11513	0.0769946	0.141714	0.180401							0.160474	0.103966	0.0381782	0.163422							0.125873	0.133497	0.0159562	0.0481502							0.160329	0.0943817	0.0355147
0.137135	0.203091	0.0807942	0.0792709	0.134122								0.148621	0.192843	0.149308	0.117243							0.323797	0.181816	0.0716124	0.124161							0.166877	0.122954	0.19042	0.063932							0.042659	0.0607477	0.106217
0.351236	0.442116	0.0236038	0.0112397	0.0344091								0.0637219	0.209277	0.0836008	0.119122							0.224984	0.0993021	0.145563	0.309051							0.226523	0.105773	0.136256	0.0756731							0.359191	0.0773131	0.175032
0.319834	0.148373	0.170317	0.151778	0.185941								0.275243	0.0976495	0.0471917	0.324158							0.271031	0.153903	0.184729	0.065419							0.290968	0.0947559	0.0885623	0.209059							0.0533783	0.114162	0.0597312
0.371092	0.283693	0.0782936	0.0961704	0.180443								0.131407	0.125841	0.00928206	0.0575956							0.193334	0.218989	0.16414	0.241208							0.0407214	0.20991	0.00333768	0.0734081							0.160416	0.0843461	0.195576
0.0993103	0.255449	0.360351	0.179587	0.126307								0.10292	0.110087	0.155536	0.155448							0.179792	0.0619491	0.0381537	0.0877473							0.0805488	0.0249888	0.089455	0.0297353							0.091112	0.203023	0.241117
0.153322	0.0559479	0.139598	0.129966	0.166987								0.130524	0.124289	0.0441925	0.148442							0.105285	0.223341	0.129295	0.0332601							0.0674708	0.211064	0.093585	0.0568155							0.0746396	0.0551211	0.285329
0.183526	0.153838	0.444709	0.0938886	0.187258								0.190525	0.164678	0.129994	0.176985							0.231572	0.155779	0.107484	0.0767724							0.0490301	0.0828312	0.25496	0.0623904							0.0729324	0.117779	0.0727835
0.23036	0.0259236	0.0761576	0.142912	0.288799								0.141747	0.173611	0.107599	0.214791							0.124131	0.055004	0.058892	0.089472							0.0185364	0.0176914	0.0826049	0.110846							0.176783	0.0334259	0.10059
0.0952018	0.198079	0.145951	0.420951	0.150311								0.250884	0.0687116	0.183473	0.168015							0.287079	0.0758009	0.0392112	0.161887							0.0925471	0.148606	0.258688	0.0855827							0.0517178	0.0960652	0.051272
0.142389	0.0757739	0.141245	0.0764012	0.195376								0.0191678	0.0534155	0.0747132	0.238088							0.0364972	0.0555044	0.23572	0.0757261							0.130814	0.0169817	0.273184	0.176633							0.076837	0.0468051	0.0312322
0.0200658	0.041398	0.253095	0.263163	0.128598								0.0438095	0.0958404	0.20683	0.0564817							0.119415	0.0183807	0.282198	0.274732							0.00930189	0.138302	0.0590837	0.0231034							0.0810235	0.00324518	0.103585
0.124422	0.107575	0.138249	0.24315	0.244727								0.205559	0.0925372	0.364867	0.0351047							0.18037	0.0507072	0.149555	0.185761							0.129013	0.175721	0.0426444	0.174081							0.0893554	0.0400158	0.107715
0.192774	0.122946	0.248247	0.108576	0.15341								0.0940581	0.0803215	0.112846	0.198472							0.199823	0.0839565	0.325145	0.0867076							0.282979	0.181157	0.0385927	0.076758							0.00461617	0.0227178	0.269678
0.0897687	0.222051	0.0996597	0.331503	0.127919								0.241859	0.250583	0.0562458	0.0752768							0.247844	0.126485	0.441853	0.0546141							0.16234	0.198515	0.150981	0.174525							0.0157568	0.105552	0.204511
0.204133	0.0920506	0.158508	0.162726	0.237219								0.121313	0.0843494	0.150557	0.329189							0.183547	0.251147	0.252371	0.0285731							0.181099	0.302462	0.226946	0.242718							0.130321	0.0931769	0.0451187
0.27771	0.171238	0.0266049	0.136071	0.219549								0.108288	0.177256	0.103692	0.245744							0.140391	0.135183	0.318649	0.071236							0.0354124	0.0810697	0.0832267	0.114399							0.118391	0.0891418	0.281986
0.0873972	0.176831	0.133554	0.237763	0.0308764								0.106522	0.0862355	0.0451051	0.211079							0.224782	0.2765	0.20949	0.055134							0.0771286	0.102696	0.147366	0.224301							0.170818	0.0523623	0.261456
0.137503	0.240613	0.0494258	0.0771636	0.218528								0.0982827	0.111052	0.131239	0.118105							0.323231	0.0775281	0.097884	0.081022							0.125232	0.217624	0.142126	0.120088							0.00330217	0.00953734	0.0521387
0.0736695	0.169147	0.108774	0.26704	0.143277								0.103193	0.1035	0.260288	0.109196							0.178056	0.110688	0.184433	0.0344113							0.263324	0.201461	0.157252	0.335107							0.0435985	0.216528	0.318397
0.117955	0.0801331	0.0393422	0.0677915	0.170008								0.230206	0.167118	0.129932	0.251859							0.0868264	0.20751	0.0762323	0.105906							0.128789	0.164016	0.0233752	0.303455							0.123311	0.183595	0.170646
0.0758259	0.176968	0.135217	0.148169	0.0787555								0.208377	0.197853	0.273632	0.0661168							0.285934	0.261142	0.0941875	0.192943							0.0582673	0.0545644	0.164917	0.127017							0.193762	0.0714064	0.191725
0.180264	0.118396	0.105088	0.250127	0.0472245								0.180475	0.199454	0.138017	0.269223							0.323893	0.050876	0.242045	0.263982							0.0565507	0.166161	0.123311	0.0410213							0.322476	0.146938	0.114801
0.129977	0.250928	0.181587	0.0438126	0.243757								0.145511	0.479372	0.303543	0.177889							0.439333	0.234302	0.26007	1.0506							0.110941	0.329793	0.220915	0.105671							0.229799	0.0620477	0.0704237
0.405158	0.108714	0.083078	0.203235	0.174896								0.131957	0.0813569	0.186696	0.0699201							0.19864	0.116307	0.113992	0.133396							0.142649	0.432388	0.115818	0.0196831							0.19698	0.1315	0.096087
0.200545	0.208442	0.129472	0.167524	0.104127								0.121901	0.215971	0.322164	0.325953							0.282909	0.085108	0.164268	0.19658							0.0254253	0.215601	0.234757	0.0554865							0.353245	0.00161578	0.0557527
0.115669	0.0548935	0.124716	0.202209	0.0543508								0.0607991	0.245025	0.224029	0.284168							0.461506	0.0960806	0.110795	0.114392							0.0589914	0.201304	0.188655	0.0927643							0.172986	0.00486734	0.250409
0.146359	0.360794	0.27172	0.307696	0.138144								0.0237876	0.112841	0.0685888	0.820216							0.159231	0.101665	0.086438	0.211173							0.0859565	0.0783293	0.173412	0.105556							0.13891	0.0876697	0.155516
0.119065	0.197652	0.368852	0.200175	0.0603817								0.0846569	0.0136024	0.154989	0.146564							0.0469349	0.244397	0.113368	0.131486							0.127004	0.0181114	0.262595	0.0641932							0.13776	0.0852964	0.108086
0.0732836	0.420391	0.0446874	0.322048	0.0893578								0.0812028	0.322473	0.153149	0.122623							0.162409	0.108353	0.193998	0.342556							0.0971913	0.0209801	0.212479	0.16415							0.105073	0.0333209	0.165478
0.0525023	0.0249933	0.0986866	0.168066	0.179665								0.0784298	0.0686908	0.23469	0.410138							0.429052	0.271233	0.188734	0.155966							0.0971689	0.172222	0.214459	0.13754							0.0599606	0.129824	0.0239444
0.17904	0.112217	0.217763	0.262317	0.156292								0.12007	0.108589	0.26788	0.141215							0.193638	0.243151	0.348215	0.124155							0.0438936	0.193393	0.234683	0.0395786							0.142657	0.247414	0.212025
0.056655	0.0654853	0.336515	0.106132	0.223145								0.127566	0.0872537	0.105316	0.130984							0.720583	0.0793869	0.298632	0.140506							0.0421247	0.383432	0.0738373	0.0905113							0.320228	0.0894362	0.0531384
0.24877	0.202543	0.15227	0.188548	0.123692								0.114772	0.186588	0.167757	0.0560225							0.276184	0.094338	0.0357323	0.057562							0.138917	0.0337362	0.348329	0.407957							0.223635	0.260127	0.0932178
0.161886	0.188207	0.226789	0.146459	0.0717919								0.240524	0.131125	0.151829	0.138079							0.0276963	0.0911564	0.0413115	0.119559							0.284498	0.275981	0.186245	0.225143							0.165636	0.132861	0.0982108
0.141101	0.323774	0.816356	0.0297926	0.207088								0.133222	0.0783761	0.249968	0.0976218							0.206854	0.0696511	0.0614758	0.234513							0.0642967	0.181437	0.703912	0.245437							1.04908	0.192511	0.255802
0.165801	0.279877	0.0689069	0.136304	0.0947144								0.256746	0.0675763	0.199538	0.349246							0.0378581	0.0817044	0.0235356	0.0599996							0.172075	0.101934	0.121449	0.972345							0.150883	0.288704	0.199466
0.353049	0.167244	0.0612518	0.231573	0.0254897								0.186259	0.07962	0.226866	0.104408							0.21336	0.0891805	0.0937508	0.281759							0.176348	0.0931903	0.118442	0.234129							0.0807197	0.181691	0.0550384
0.412279	0.121912	0.0905052	0.264083	0.177946								0.230069	0.119911	0.290328	0.195376							0.182282	0.132988	0.0559156	0.217329							0.143385	0.120927	0.215113	0.269459							0.182748	0.0906553	0.241761
0.317921	0.161056	0.284879	0.183005	0.174665								0.0969668	0.0855289	0.0920538	0.166032							0.400193	0.0301929	0.111557	0.131022							0.109938	0.176998	0.112426	0.145952							0.156318	0.0862405	0.151771
0.285121	0.16163	0.0638197	0.239764	0.144574								0.0946726	0.187902	0.19288	0.283038							0.210342	0.290178	0.0193579	0.216265							0.166895	0.173166	0.138147	0.172779							0.193862	0.149265	0.150887
0.0989436	0.015389	0.116395	0.131928	0.0274901								0.157127	0.0974914	0.228233	0.0312869							0.105089	0.0408106	0.127315	0.277665							0.0355844	0.369361	0.0751366	0.0886909							0.374308	0.185278	0.279474
0.193894	0.372938	0.397441	0.114885	0.0519097								0.39218	0.186648	0.260728	0.0866343							0.231213	0.0596264	0.0513807	0.150403							0.0634003	0.0839887	0.113698	0.120446							0.248685	0.234944	0.174257
0.220469	0.137766	0.138043	0.415048	0.187237								0.160332	0.186407	0.234362	0.135379							0.170109	0.131658	0.273439	0.131259							0.0948976	0.0852055	0.101255	0.161885							0.0286431	0.0834397	0.06274
0.019291	0.164652	0.147969	0.0752086	0.128117								0.341	0.234291	0.290706	0.137468							0.0811578	0.228537	0.178637	0.0712761							0.195476	0.0651035	0.0778098	0.291226							0.0739283	0.0696961	0.131834
0.0846226	0.124414	0.243407	0.265931	0.129273								0.155284	0.18525	0.137184	0.703231							0.157476	0.282657	0.0950006	0.0444721							0.0199032	0.129252	0.149153	0.231703							0.221579	0.811993	0.028624
0.185922	0.365341	0.148284	0.0899069	0.2978								0.220461	0.256628	0.255497	0.089695							0.166194	0.210482	0.112395	0.106713							0.131016	0.10094	0.137195	0.208749							0.0702769	0.0584116	0.0839923
0.74734	0.150365	0.0169325	0.246012	0.154654								0.108536	0.144862	0.416799	0.0818232							0.0575425	0.143306	0.0770735	0.198135							0.0648294	0.0410218	0.136098	0.266136							0.0326744	0.0329105	0.110006
0.290812	0.13832	0.0935425	0.0880996	0.105164								0.195989	0.185098	0.14251	0.079319							0.0395752	0.286525	0.109934	0.145088							0.0475824	0.12079	0.0929125	0.246705							0.105027	0.0566865	0.280197
0.212914	0.0305703	0.103934	0.639275	0.0945482								0.0905978	0.115401	0.0623701	0.262617							0.221793	0.28935	0.18886	0.187367							0.0540951	0.267212	0.101101	0.0787713							0.0591525	0.0662197	0.209564
0.0398785	0.163061	0.102233	0.291596	0.0528599								0.177686	0.101005	0.174997	0.0502757							0.0773397	0.10649	0.0640123	0.331925							0.301539	0.112657	0.179327	0.0109679							0.193276	0.0966515	0.261166
0.21843	0.0343304	0.101995	0.198677	0.129927								0.0672151	0.0940388	0.0758918	0.160733							0.217811	0.231443	0.0175769	0.506033							0.090988	0.162022	0.199873	0.155513							0.107802	0.399252	0.0711358
0.31627	0.249535	0.351365	0.102713	0.245395								0.152704	0.121845	0.123535	0.187472							0.149081	0.102869	0.228484	0.0753572							0.223366	0.199707	0.133846	0.067914							0.236103	0.0597836	0.061124
0.225259	0.221399	0.144989	0.240897	0.145464								0.186415	0.204136	0.142821	0.157655							0.14618	0.21422	0.269168	0.0926815							0.139877	0.189886	0.0382226	0.0836468							0.117302	0.109584	0.0726986
0.2643	0.250926	0.209673	0.0862059	0.0773874								0.123916	0.104129	0.0945647	0.418837							0.103637	0.188679	0.143989	0.274927							0.301449	0.108143	0.155281	0.0554022							0.0728692	0.0585577	0.136413
0.110433	0.362917	0.207724	0.0880673	0.183008								0.19513	0.0835681	0.0462202	0.224071							0.0898181	0.179421	0.102835	0.0216524							0.0748295	0.140589	0.141787	0.0749954							0.0287008	0.024129	0.403291
0.194782	0.178176	0.108727	0.156079	0.188185								0.133575	0.0264857	0.179806	0.13584							0.101662	0.270094	0.0664027	0.079863							0.231491	0.146829	0.416723	0.139351							0.359672	0.0956269	0.0615055
0.0192921	0.12171	0.210048	0.190827	0.0979031								0.0799402	0.19137	0.0943059	0.212498							0.180743	0.124028	0.127607	0.0497392							0.0528759	0.321782	0.0677689	0.0695189							0.133729	0.138302	0.0461575
0.0855557	0.143281	0.191502	0.128516	0.127385								0.0745228	0.0952314	0.0488358	1.09985							0.101049	0.181954	0.131423	0.072029							0.071151	0.0285412	0.160559	0.0394185							0.0974894	0.142608	0.1389
0.028566	0.136129	0.27083	0.0893561	0.183668								0.0429945	0.0536972	0.331994	0.121268							0.288761	0.259221	0.0689235	0.0940746							0.0807516	0.0723441	0.170551	0.161625							0.23131	0.292941	0.0509965
0.160206	0.166353	0.0616743	0.0897539	0.935062								0.0627997	0.0568183	0.0477909	0.983618							0.281921	0.15057	0.0605306	0.0642541							0.108451	0.0591357	0.14053	0.0115773							0.202629	0.0871915	0.0694826
0.133382	0.393012	0.259268	0.210228	0.21482								0.244234	0.268019	0.0876512	0.103847							0.167369	0.0269971	0.0263737	0.193006							0.110473	0.168027	0.07693	0.0357902							0.0501719	0.145695	0.0484418
0.150668	0.066661	0.364677	0.199649	0.15293								0.125599	0.0593689	0.249008	0.130343							0.0763278	0.141185	0.0619679	0.453288							0.0867129	0.322473	0.187587	0.208868							0.0215609	0.198595	0.229621
0.17119	0.0983797	0.0394665	0.126474	0.126729								0.0903984	0.209743	0.489317	0.116811							0.143623	0.0945892	0.134989	0.107219							0.0562795	0.277498	0.133033	0.321867							0.127428	0.13561	0.0924976
0.152036	0.0953332	0.151431	0.268551	0.0655655								0.308526	0.279134	0.153064	0.393104							0.199811	0.0508583	0.0841747	0.0867459							0.0800421	0.0674665	0.282888	0.161323							0.148564	0.0585101	0.0217115
0.116618	0.205647	0.193131	0.221978	0.226022								0.176143	0.25767	0.113105	0.0582743							0.853004	0.0783357	0.128918	0.148246							0.451268	0.0646808	0.078256	0.0665284							0.128172	0.135742	0.140379
0.144077	0.126537	0.125824	0.201197	0.146602								0.172145	0.161392	0.30108	0.130878							0.0767567	0.0952352	0.0561854	0.0339215							0.0690137	0.0630862	0.128992	0.116614							0.0614418	0.0531591	0.107196
0.0569514	0.164188	0.0603906	0.154212	0.0739178								0.349772	0.0892947	0.350064	0.0964835							0.167989	0.0889426	0.110993	0.282563							0.0144707	0.0719105	0.107248	0.0346319							0.250055	0.186226	0.505572
0.255022	0.0758558	0.0593582	0.181273	0.382457								0.120842	0.129142	0.329574	0.547908							0.130858	0.0277323	0.126909	0.116263							0.182364	0.0431341	0.212433	0.064229							0.19105	0.113852	0.334094
0.353236	0.050178	0.17622	0.127867	0.0239481								0.316038	0.179101	0.373559	0.201489							0.202275	0.0899593	1.08904	0.148554							0.197105	0.0671592	0.0533317	0.0871779							0.0462419	0.171784	0.103475
0.145342	0.038095	0.210963	0.0453417	0.111656								0.30795	0.253002	0.156148	0.338332							0.17802	0.230112	0.122694	0.129632							0.350859	0.209683	0.0566807	0.140712							0.171481	0.0436883	0.0659472
0.137033	0.116569	0.200846	0.0852249	0.121675								0.138081	0.0431916	0.0687036	0.110775							0.36218	0.137834	0.0734493	0.240527							0.352838	0.04732	0.0171081	0.0773448							0.216628	0.109714	0.174753
0.148078	0.164022	0.181109	0.253286	0.143166								0.13699	0.0188259	0.0717685	0.168228							0.526049	0.143307	0.128936	0.153638							0.0187746	0.067381	0.0898568	0.0260801							0.169989	0.0067485	0.0503077
0.0906769	0.112054	0.345512	0.167223	0.112299								0.484794	0.304754	0.139304	0.119045							0.212208	0.341989	0.0371299	0.0731337							0.0927874	0.0561502	0.0924592	0.0641421							0.0478375	0.0905688	0.0277774
0.133827	0.0505743	0.185595	0.210072	0.110704								0.106919	0.290276	0.145566	0.163229							0.0598772	0.0524516	0.321912	0.186329							0.086727	0.103757	0.181343	0.0864495							0.208547	0.0546139	0.0490106
0.103694	0.171963	0.186504	0.0185694	0.0502789								0.191464	0.15388	0.230015	0.0728438							0.285684	0.0135024	0.179899	0.241901							0.136189	0.113426	0.0962718	0.347869							0.200599	0.0107463	0.0683234
0.229832	0.134539	0.0474324	0.26988	0.204992								0.159348	0.15318	0.139595	0.288498							0.0407218	0.126193	0.22165	0.248251							0.19671	0.309209	0.112489	0.0779358							0.0672762	0.0944472	0.0747523
0.189725	0.183493	0.345172	0.0490142	0.160975								0.252079	0.111774	0.420062	0.155804							0.706073	0.199026	0.191219	0.250475							0.139841	0.0311339	0.247837	0.148956							0.0545292	0.006422	0.0824704
0.174692	0.13133	0.125724	0.241674	0.14616								0.0341352	0.180618	0.0784114	0.115864							0.153818	0.784841	0.18332	0.0967843							0.0513353	0.214002	0.0384727	0.131733							0.32645	0.056225	0.132872
0.023592	0.625307	0.271868	0.331296	0.249083								0.158835	0.182008	0.218465	0.0892184							0.0397276	0.203357	0.112524	0.254941							0.0891951	0.105489	0.061919	0.196051							0.0556794	0.155912	0.0884706
0.219608	0.0646986	0.152484	0.313919	0.091431								0.19091	0.187856	0.20623	0.110695							0.0435869	0.324132	0.0625264	0.174565							0.120886	0.225492	0.077249	0.310536							0.0587996	0.109816	0.0929528
0.181758	0.283305	0.0557664	0.158335	0.112983								0.139934	0.145019	0.269582	0.0282146							0.0796183	0.0942892	0.188084	0.1674							0.0481055	0.0845204	0.789805	0.0818317							0.18221	0.036922	0.0578889
0.193383	0.129738	0.182789	0.167532	0.277147								0.0580909	0.421405	0.232215	0.300475							0.0968928	0.116944	0.10688	0.0751505							0.0491454	0.0666964	0.126986	0.17165							0.466099	0.0716512	0.0345279
0.232198	0.24304	0.197055	0.168863	0.536112								0.222882	0.0429705	0.170076	0.380802							0.0784489	0.173664	0.0230617	0.139							0.0753094	0.10957	0.224319	0.312799							0.179455	0.136777	0.0122018
0.172261	0.239517	0.184479	0.445333	0.198642								0.353144	0.219702	0.227529	0.0481823							0.337855	0.289972	0.111795	0.155599							0.127433	0.144295	0.201564	0.0969136							0.0271094	0.110257	0.203336
0.24485	0.286488	0.259898	0.189956	0.0851693								0.220405	0.00928073	0.130795	0.986888							0.10893	0.278248	0.0616866	0.19769							0.101746	0.234524	0.118319	0.100856							0.085006	0.0754456	0.371308
0.173442	0.159222	0.0372266	0.092364	0.124713								0.254405	0.232757	0.262056	0.129884							0.115065	0.11319	0.336563	0.0816064							0.027273	0.148558	0.231647	0.206261							0.0575661	0.0886541	0.0114845
0.0936739	0.00913343	0.0928339	0.197376	0.131435								0.197157	0.1149	0.0880315	0.177471							0.245238	0.423231	0.182773	0.112734							0.562634	0.114354	0.108603	0.157693							0.217663	0.31074	0.131266
0.150942	0.241414	0.233237	0.0315994	0.0662984								0.15972	0.0696921	0.328405	0.0355995							0.127921	0.177876	0.149366	0.0384794							0.153018	0.123786	0.0321265	0.266528							0.181265	0.245907	0.147051
0.0294491	0.194017	0.0658465	0.133403	0.221126								0.113098	0.156715	0.842373	0.106111							0.103981	0.214532	0.119719	0.137686							0.0302944	0.246488	0.00833548	0.170204							0.264843	0.832678	0.234492
0.237974	0.229239	0.0519375	0.0439687	0.191371								0.081781	0.135085	0.20674	0.210502							0.177824	0.0779379	0.383363	0.142025							0.0470452	0.240171	0.149208	0.121328							0.0722478	0.250028	0.298834
0.25737	0.339785	0.199149	0.0180737	0.113672								0.17578	0.225748	0.0514866	0.203319							0.0702391	0.0151325	0.0502375	0.1334							0.221489	0.107064	0.146905	0.120162							0.0369394	0.0223341	0.0453177
0.187948	0.18942	0.158485	0.0695217	0.0537003								0.0420198	0.0372547	0.331165	0.158263							0.0692194	0.0637464	0.120034	0.196775							0.0631257	0.0995359	0.116865	0.112795							0.0625266	0.0669563	0.122393
0.11548	0.0761914	0.250451	0.185187	0.233376								0.415964	0.172576	0.0512109	0.0379578							0.0586841	0.170503	0.152378	0.0393169							0.0602301	0.0751581	0.147931	0.170382							0.114144	0.0185585	0.0691228
0.144802	0.0244002	0.28528	0.631022	0.220613								0.475793	0.135698	0.036861	0.0680088							0.0971102	0.173087	0.275066	0.182818							0.100523	0.0943384	0.0392696	0.082612							0.120771	0.153334	0.239985
0.386075	0.0539582	0.213923	0.634302	0.131447								0.284805	0.116007	0.118521	0.126663							0.091149	0.303157	0.252986	0.209991							0.241806	0.0620763	0.0590149	0.164261							0.104894	0.174236	0.019334
0.21796	0.232492	0.0404286	0.130082	0.0599359								0.0335964	0.196141	0.054067	0.0931718							0.0500376	0.0874069	0.0661698	0.356933							0.0934816	0.073326	0.0512819	0.109057							0.345186	0.0768426	0.274134
0.0690506	0.258762	0.167749	0.0857898	0.159387								0.254497	0.048305	0.10335	0.18113							0.0640852	0.0882751	0.091363	0.126275							0.0414677	1.05231	0.175654	0.0697045							0.15847	0.0600701	0.0875933
0.084184	0.178276	0.0382041	0.226754	0.181317								0.0765822	0.145482	0.222986	0.050616							0.313872	0.0563957	0.0869707	0.12144							0.226639	0.171647	0.247305	0.0247948							0.0822772	0.164382	0.20531
0.230581	0.672995	0.0651503	0.200378	0.210255								0.112131	0.0327702	0.257228	0.200236							0.103778	0.0875194	0.279587	0.0803542							0.224987	0.36728	0.0438491	0.0776599							0.0640175	0.140738	0.0456828
0.0908424	0.17584	0.159587	0.201188	0.115604								0.88599	0.0686552	0.0631453	0.10853							0.278662	0.102694	0.0944359	0.0816139							0.0638925	0.378039	0.149947	0.026911							0.177263	0.609692	0.0586232
0.385515	0.225076	0.216773	0.189821	0.150157								0.08087	0.216274	0.140094	0.149465							0.110647	0.0063798	0.218062	0.0369036							0.0385274	0.15653	0.182419	0.0403384							0.0669133	0.574854	0.168549
0.0643909	0.205179	0.355333	0.194232	0.117852								0.128735	0.192219	0.110147	0.235875							0.149154	0.235485	0.0492756	0.0781585							0.42759	0.169638	0.13775	0.0271741							0.178039	0.324572	0.0718713
0.133571	0.106679	0.204922	0.0595555	0.11728								0.108743	0.0516402	0.127338	0.194313							0.111303	0.112655	0.0820634	0.028646							0.0137682	0.0190444	0.0628966	0.1238							0.17405	0.153995	0.0814233
0.159423	0.14541	0.230565	0.165372	0.0322568								0.194046	0.160182	0.0303687	0.346597							0.0534473	0.48926	0.115777	0.133765							0.230739	0.0187565	0.0839561	0.105785							0.537201	0.114138	0.0581585
0.0731348	0.150587	0.105068	0.0375029	0.191752								0.214336	0.171844	0.0679891	0.187341							0.189992	0.0563925	0.222366	0.140224							0.152127	0.0219404	0.142879	0.0779863							0.286656	0.0639977	0.141157
0.111396	0.0510449	0.105831	0.0866819	0.0957645								0.253775	0.106487	0.227699	0.192373							0.0922957	0.210879	0.249279	0.0372343							0.125639	0.194443	0.0441146	0.0855728							0.144911	0.1405	0.426044
0.214316	0.0970986	0.148306	0.00618686	0.162233								0.236369	0.271211	0.142043	0.178558							0.214631	0.0860842	0.132107	0.0295563							0.101709	0.172107	0.100004	0.179269							0.281271	0.103614	0.0958883
0.353188	0.217755	0.181567	0.116058	0.199819								0.104904	0.0578307	0.187734	0.10755							0.076136	0.138925	1.08592	0.0173718							0.0835617	0.20936	0.0288392	0.0912712							0.0732956	0.0355841	0.0788662
0.105048	0.0854137	0.102121	0.142995	0.209528								0.203466	0.111116	0.167266	0.19178							0.159676	0.255223	0.117103	0.0994366							0.0715795	0.436989	0.116667	0.146418							0.0763226	0.444219	0.118711
0.0437517	0.251827	0.0120454	0.0721262	0.0884283								0.183188	0.111422	0.194337	0.304089							0.185505	0.127082	0.0657198	0.135168							0.109761	0.0576163	0.0687416	0.475494							0.284034	0.0750881	0.0609038
0.0947985	0.0223508	0.173789	0.131386	0.31427								0.196803	0.190949	0.141856	0.224387							0.0808749	0.198682	0.329414	0.514796							0.0945468	0.0578099	0.083029	0.153111							0.171485	0.427014	0.111048
0.147195	0.240331	0.264755	0.29703	0.235234								0.0662135	0.0827401	0.145502	0.217012							0.251389	0.247153	0.128269	0.280957							0.694303	0.0430073	0.0469707	0.0824955							0.027336	0.206393	0.072054
0.0952726	0.172652	0.0804767	0.331822	0.0522622								0.147706	0.125661	0.176618	0.193726							0.184893	0.0814751	0.16583	0.0746223							0.149691	0.173494	0.126832	0.108566							0.166987	0.0240127	0.237001
0.125204	0.11549	0.164635	0.175923	0.180574								0.114847	0.163866	0.243172	0.152301							0.273145	0.145876	0.185648	0.0371603							0.0509278	0.15355	0.0709523	0.117971							0.218189	0.174361	0.244034
0.176295	0.09033	0.114182	0.114527	0.277775								0.0904678	0.14983	0.23451	0.221919							0.0626345	0.0747427	0.27496	0.128242							0.146678	0.00552355	0.0358016	0.077269							0.0538542	0.12676	0.0765192
0.120265	0.117313	0.34686	0.161217	0.322954								0.0982336	0.0828019	0.112891	0.203226							0.121604	0.181049	0.161267	0.0349215							0.359704	0.0499189	0.129686	0.186065							0.112096	0.0609742	0.0485985
0.0547988	0.00226825	0.263398	0.172922	0.0991647								0.0742275	0.134547	0.293217	0.210343							0.17037	0.129289	0.192462	0.0289981							0.0604589	0.0895652	0.149379	0.0639154							0.134901	0.063341	0.0949097
0.208157	0.149684	0.122667	0.24963	0.0879579								0.0320476	0.261991	0.147546	0.0993094							0.236849	0.116464	0.256939	0.129908							0.0688566	0.17667	0.0567453	0.0437996							0.277602	0.0557909	0.102469
0.346206	0.268249	0.0961942	0.399856	0.0240541								0.036087	0.225979	0.1914	0.132561							0.294775	0.16083	0.0889618	0.189035							0.0928682	0.218206	0.0368066	0.101915							0.0584641	0.0894723	0.351452
0.287823	0.079002	0.169536	0.259186	0.326439								0.0440357	0.238326	0.118571	0.140947							0.203737	0.0933065	0.201771	0.211571							0.0803165	0.0557733	0.0837943	0.0274292							0.105068	0.0898922	0.049527
0.0535028	0.253235	0.185415	0.214901	0.289988								0.0805017	0.680712	0.087525	0.10623							0.0691458	0.230703	0.0702628	0.142706							0.0626327	0.102435	0.0977393	0.121381							0.248998	0.133175	0.0953594
0.133599	0.18204	0.0469555	0.0792018	0.229524								0.0731383	0.0882622	0.0411616	0.186884							0.308241	0.303504	0.0781078	0.109989							0.0453794	0.0450291	0.0748839	0.114211							0.104726	0.0552852	0.0550584
0.0949466	0.134995	0.282648	0.0361932	0.193141								0.100575	0.226633	0.0797506	0.34631							0.121479	0.142869	0.0603889	0.0792359							0.0428065	0.0982753	0.0794606	0.243289							0.0656899	0.176047	0.0252159
0.156832	0.097783	0.0812383	0.35343	0.116411								0.0810479	0.240143	0.0945505	0.0464077							0.0437146	0.366569	0.0732137	0.184578							0.0481554	0.128301	0.0495952	0.239526							0.035754	0.201678	0.0589293
0.0625733	0.165526	0.0788756	0.0909816	0.0764504								0.149061	0.0674961	0.126711	0.0685967							0.28277	0.129941	0.105771	0.0460953							0.152107	0.171796	0.213368	0.0393484							0.082118	0.25576	0.106351
0.122265	0.228098	0.303046	0.159508	0.159106								0.0564324	0.239611	0.132798	0.403914							0.316458	0.160292	0.0723007	0.109192							0.100773	0.19824	0.124238	0.0578206							0.117644	0.0808876	0.0592257
0.215085	0.190218	0.318157	0.0934769	0.0981024								0.118256	0.168544	0.108616	0.0790795							0.0902921	0.18201	0.0530692	0.0364156							0.063991	0.20773	0.0753648	0.056717							0.056298	0.196297	0.0414239
0.0681624	0.117781	0.152545	0.100951	0.0411024								0.098064	0.0819504	0.163067	0.234132							0.141452	0.211261	0.0794533	0.0726853							0.220043	0.419993	0.143521	0.217252							0.0868877	0.225635	0.0390047
0.661185	0.130062	0.102948	0.195339	0.143481								0.225336	0.0959461	0.296205	0.205578							0.201866	0.379092	0.170396	0.192727							0.0777883	0.219239	0.290499	0.199236							0.166297	0.167326	0.0338272
0.0941965	0.178104	0.0624457	0.0555851	0.138401								0.1007	0.244895	0.233174	0.051945							0.133497	0.183783	0.237653	0.172454							0.213461	0.173559	0.269666	0.0574218							0.125999	0.140019	0.0606479
0.19083	0.0514792	0.0643472	0.308097	0.161556								0.0634447	0.181618	0.195908	0.187705							0.16508	0.175722	0.197148	0.149911							0.312143	0.23292	0.145382	0.0645065							0.0816393	0.0609371	0.119424
0.0974133	0.137041	0.10274	0.189447	0.233128								0.319851	0.123607	0.165763	0.250265							0.0661133	0.179323	0.262476	0.187921							0.00468664	0.0737889	0.1409	0.0866214							0.233204	0.21157	0.0190745
0.108976	0.137359	0.143099	0.0308007	0.0747406								0.147537	0.262763	0.185863	0.032895							0.142799	0.12573	0.206298	0.365946							0.114621	0.0959387	0.175262	0.253197							0.0727617	0.16049	0.0448299
0.0644326	0.061948	0.319019	0.0910713	0.0954								0.120303	0.113171	0.028625	0.186177							0.104371	0.220709	0.114521	0.165551							0.226515	0.220124	0.010396	0.129717							0.148611	0.17981	0.127702
0.202892	0.310264	0.213224	0.206761	0.157403								0.0392461	0.155534	0.35404	0.149134							0.254849	0.0422429	0.108711	0.0703276							0.111975	0.409681	0.0949689	0.122406							0.186545	0.0713426	0.0714832
0.232843	0.0865316	0.0370611	0.21348	0.134748								0.0913439	0.251619	0.510287	0.0377521							0.179281	0.43396	0.357065	0.0373082							0.200651	0.307206	0.0819397	0.253328							0.118321	0.120835	0.250812
0.1812	0.0887956	0.0352916	0.0822959	0.123791								0.241831	0.202058	0.196352	0.0978446							0.0852109	0.0631336	0.148838	0.0683521							0.0324187	0.160808	0.109195	0.195172							0.446368	0.09973	0.256238
0.063958	0.173579	0.263904	0.0752125	0.19337								0.412037	0.185647	0.146692	0.219582							0.195641	0.099197	0.128832	0.0445475							0.0566849	0.15335	0.0901519	0.177974							0.0549307	0.143625	0.296952
0.276447	0.0787164	0.280372	0.110922	0.115422								0.10025	0.221792	0.217768	0.108992							0.181129	0.279592	0.046037	0.0762353							0.112072	0.203043	0.233922	0.0997765							0.126191	0.0741471	0.143009
0.10939	0.0536267	0.169358	0.0520849	0.162166								0.140236	0.0311273	0.135137	0.19419							0.326501	0.0580171	0.0293041	0.13781							0.0806513	0.159694	0.0544505	0.162124							0.0121482	0.145686	0.0779114
0.129508	0.112526	0.187242	0.00775293	0.106586								0.0710717	0.0978923	0.173098	0.116904							0.08771	0.172569	0.231577	0.081157							0.184546	0.143677	1.03157	0.0325446							0.0375551	0.0610578	0.0731553
0.235509	0.107616	0.918908	0.23852	0.846819								0.564277	0.125403	0.14582	0.209953							0.14581	0.14091	0.211911	0.260636							0.277082	0.178364	0.0548521	0.00890182							0.0828777	0.105943	0.07012
0.138364	0.147132	0.114906	0.0988665	0.0834846								0.208032	0.0745998	0.133668	0.186219							0.124769	0.138377	0.0565816	0.191133							0.261692	0.376926	0.665582	0.0654152							0.124519	0.0741574	0.0307391
0.040986	0.0464362	0.0590528	0.170197	0.305217								0.0798498	0.0792458	0.102279	0.174637							0.132235	0.147475	0.116047	0.192515							0.102225	0.0810008	0.217313	0.163014							0.0672711	0.124079	0.00427289
0.219166	0.210872	0.378582	0.152602	0.24545								0.120431	0.0987957	0.204522	0.251399							0.17592	0.184351	0.158604	0.0761124							0.0783379	0.120159	0.134659	0.345589							0.140895	0.0450406	0.110534
0.194931	0.288901	0.0744498	0.0351225	0.0505084								0.120648	0.214342	0.146301	0.16563							0.281969	0.215103	0.0406061	0.104321							0.148265	0.0501038	0.128853	0.0653952							0.0876803	0.111144	0.0105178
0.298845	0.136398	0.232416	0.17285	0.219458								0.167901	0.0442267	0.0661262	0.124747							0.132585	0.072224	0.165505	0.345844							0.396719	0.0333536	0.286723	0.112271							0.0649707	0.015198	0.153094
0.122609	0.166397	0.0695488	0.298205	0.149461								0.0517021	0.237824	0.167508	0.183441							0.0274469	0.117843	0.0856469	0.07504							0.16125	0.0979218	0.0389693	0.262888							0.0834579	0.0401501	0.0394245
0.21816	0.10443	0.0810777	0.0501409	0.212043								0.0875456	0.0745049	0.119766	0.408742							0.11502	0.496496	0.155865	0.102249							0.320731	0.15412	0.21717	0.638185							0.10658	0.206122	0.226104
0.643114	0.151761	0.0623009	0.0667708	0.049132								0.406091	0.292923	0.0783479	0.0979405							0.0395786	0.430139	0.127042	0.0265689							0.143978	0.162908	0.135947	0.352396							0.0809562	0.100473	0.222773
0.110239	0.126308	0.0189898	0.325284	0.151912								0.113525	0.0797375	0.152004	0.0716826							0.173432	0.0685099	0.0946065	0.0360373							0.145009	0.407711	0.108225	0.158155							0.15014	0.299393	0.167115
0.121072	0.160293	0.0848359	0.0473483	0.206016								0.147807	0.148942	0.855457	0.211968							0.138731	0.0733313	0.0398082	0.0568627							0.276894	0.073811	0.0636554	0.205158							0.273424	0.0192641	0.0485256
0.135475	0.252551	0.0193896	0.161131	0.0331446								0.686549	0.111744	0.181962	0.262991							0.0833321	0.0729248	0.115897	0.175755							0.144566	0.153424	0.278644	0.118007							0.133768	0.116431	0.216518
0.041914	0.100515	0.0258982	0.0224629	0.0652971								0.0681528	0.203623	0.104726	0.135238							0.222758	0.257381	0.13202	0.0318898							0.0260284	0.119746	0.110223	0.170571							0.110625	0.0812185	0.0828166
0.0769893	0.0883426	0.070435	0.0488628	0.345218								0.0645283	0.147241	0.231959	0.20506							0.0704992	0.308867	0.0357721	0.0951738							0.106903	0.0869899	0.16193	0.0801988							0.137002	0.360899	0.105564
0.157885	0.062278	0.0807748	0.102862	0.130738								0.0465899	0.124459	0.0714573	0.114519							0.0629693	0.073978	0.076942	0.045403							0.228612	0.0962628	0.15436	0.0325109							0.0768592	0.0197962	0.284716
0.198833	0.10502	0.123948	0.249896	0.152703								0.361841	0.229569	0.046995	0.030637							0.0279379	0.212015	0.108404	0.0454263							0.115956	0.131356	0.186035	0.145324							0.0476787	0.0874772	0.0963034
0.0841212	0.0699802	0.468204	0.122371	0.086238								0.245429	0.205229	0.1401	0.0875209							0.0300194	0.0314755	0.0962402	0.0425217							0.123297	0.125931	0.102932	0.134038							0.0729478	0.312817	0.0724569
0.200461	0.0591879	0.127226	0.116385	0.416629								0.133213	0.221444	0.0498657	0.178849							0.195832	0.0474005	0.119266	0.100843							0.0235171	0.132223	0.0641998	0.0421105							0.183694	0.378557	0.189542
0.048328	0.0656258	0.345885	0.259491	0.106716								0.0886609	0.17407	0.113581	0.150493							0.16363	0.132758	0.0381994	0.131509							0.165071	0.162697	0.0922496	0.0715062							0.0324497	0.12661	0.0683989
0.520492	0.0835222	0.0476762	0.0801302	0.0579901								0.171418	0.241613	0.367157	0.208975							0.24384	0.377381	0.0717757	0.111877							0.0981616	0.185316	0.33516	0.0997763							0.107721	0.183889	0.152131
0.178863	0.18001	0.301481	0.101	0.149818								0.0768156	0.076953	0.298953	0.188267							0.0264719	0.0987679	0.0661975	0.279425							0.107177	0.00796114	0.454929	0.0489971							0.182765	0.104227	0.0855055
0.0961055	0.239618	0.287223	0.150479	0.14586								0.191508	0.278275	0.124019	1.09032							0.167868	0.288275	0.0122161	0.170761							0.183628	0.081207	0.11297	0.0979051							0.101674	0.0885118	0.0911873
0.160232	0.15177	0.0817653	0.184566	0.211881								0.195309	0.0674557	0.384752	0.113909							0.326138	0.219222	0.0308208	0.021024							0.188541	0.234163	0.0571518	0.102586							0.0645527	0.110039	0.111126
0.0805404	0.39606	0.166226	0.0456503	0.23406								0.305752	0.170057	0.0382073	0.155887							0.293054	0.0360712	0.0282339	0.0881776							0.111076	0.170458	0.0648443	0.0350842							0.0593578	0.130833	0.0409193
0.224826	0.0532849	0.212694	0.164938	0.354533								0.0425348	0.141392	0.0865295	0.129836							0.0751229	0.286706	0.127937	0.176807							0.0962372	0.22132	0.0688225	0.134939							0.146476	0.102959	0.101749
0.0620566	0.0516236	0.116119	0.101471	0.144148								0.190843	0.211348	0.0611556	0.127933							0.173406	0.153235	0.0453985	0.0463459							0.0474002	0.124597	0.0550329	0.158548							0.30693	0.0788004	0.0366944
0.131079	0.150277	0.142271	0.224413	0.101395								0.249829	0.180187	0.117153	0.082777							0.239886	0.161228	0.383388	0.0221431							0.0529118	0.0415266	0.0669002	0.215942							0.178171	0.109679	0.0176983
0.154246	0.211858	0.286526	0.226342	0.514923								0.25486	0.146833	0.0382547	0.0864057							0.250648	0.143699	0.122537	0.281452							0.00354534	0.0327415	0.122299	0.046322							0.105285	0.0566273	0.0895204
0.0835636	0.0992463	0.0605279	0.127993	0.0745083								0.358003	0.0699119	0.238758	0.214964							0.425541	0.319922	0.116119	0.113515							0.118458	0.0584554	0.951922	0.120053							0.0494384	0.108887	0.0645378
0.0880409	0.151953	0.415946	0.0687948	0.248597								0.148735	0.0639741	0.269382	0.0790836							0.302225	0.0986359	0.0751423	0.0774832							0.0179156	0.0733844	0.281822	0.200232							0.105978	0.623134	0.0530568
0.184782	0.0464623	0.2102	0.0396802	0.11427								0.269833	0.31445	0.116076	0.0853843							0.266578	0.134865	0.191656	0.104914							0.16211	0.0415808	0.0217288	0.027814							0.110826	0.0222712	0.177538
0.0167682	0.286265	0.079426	0.193458	0.0919961								0.0814328	0.190327	0.0199046	0.143273							0.34619	0.942429	0.138632	0.156096							0.275451	0.123157	0.0914062	0.158353							0.086453	0.105909	0.0521223
0.139162	0.082519	0.274296	0.114741	0.203203								0.11571	0.25503	0.0305881	0.110106							0.0536033	0.217348	0.0301803	0.159984							0.298952	0.056026	0.076412	0.111053							0.0738185	0.0943013	0.151521
0.135576	0.319513	0.215562	0.118338	0.356518								0.11082	0.296466	0.0623199	0.111058							0.251886	0.126349	0.075991	0.129646							0.0617711	0.0711681	0.145065	0.231459							0.049405	0.638144	0.171969
0.255429	0.288707	0.312668	0.0878753	0.0544973								0.301485	0.144511	0.0778325	0.129168							0.106243	0.098916	0.0475611	0.319706							0.240013	0.188716	0.144048	0.224749							0.0293735	0.451157	0.227408
0.117938	0.259293	0.238223	0.0923447	0.208889								0.748697	0.1374	0.0459932	0.192231							0.204037	0.104611	0.10488	0.0976602							0.372475	0.0859577	0.0548933	0.0752113							0.0426633	0.161207	0.208123
0.160166	0.0546078	0.0283808	0.070379	0.304435								0.302457	0.135536	0.039093	0.28723							0.233321	0.158325	0.164414	0.121913							0.254985	0.0418692	0.16987	0.0639421							0.0907564	0.190501	0.2583
0.114074	0.273878	0.0629235	0.0637037	0.288664								0.087703	0.121112	0.0614832	0.239696							0.146631	0.157459	0.107219	0.109696							0.0310641	0.0498866	0.133134	0.122411							0.0744286	0.0853827	0.156682
0.0615054	0.133575	0.104928	0.0607115	0.219271								0.0981438	0.220242	0.0623696	0.188453							0.0885889	0.00882391	0.269969	0.122797							0.236033	0.0960716	0.127624	0.088319							0.144541	0.0660441	0.0581654
0.11961	0.123263	0.168477	0.216981	0.914761								0.20742	0.127542	0.030415	0.250205							0.156097	0.106707	0.0942163	0.20517							0.0850167	0.0952245	0.0831206	0.102818							0.0657468	0.0632706	0.0475658
0.0542418	0.352012	0.074562	0.254944	0.32042								0.126279	0.0960096	0.0409762	0.104623							0.10964	0.0296811	0.10969	0.198681							0.0406932	0.0223409	0.00801201	0.205579							0.0272801	0.134137	0.122554
0.165637	0.0862024	0.149606	0.0782299	0.183594								0.0404836	0.103935	0.055929	0.177086							0.166299	0.14006	0.215892	0.246685							0.113764	0.0594268	0.147905	0.0239052							0.186423	0.0290606	0.359775
0.392199	0.188838	0.13621	0.226453	0.118944								0.293339	0.21586	0.0729796	0.0911565							0.262784	0.0646729	0.142635	0.101304							0.185634	0.0877008	0.182421	0.333453							0.129379	0.0743173	0.13911
0.112044	0.166885	0.245017	0.0863231	0.0884291								0.497824	0.177315	0.0372508	0.0638947							0.0843199	0.0981639	0.0155133	0.124917							0.153513	0.123159	0.233095	0.319672							0.0932777	0.0262245	0.171126
0.143449	0.133336	0.127815	0.0966108	0.417051								0.11001	0.167699	0.0589204	0.242777							0.257331	0.124386	0.795142	0.0851338							0.19833	0.0608181	0.236447	0.267848							0.172308	0.0392385	0.144553
0.271355	0.0128868	0.123902	0.203194	0.218314								0.270361	0.131991	0.0692513	0.0400827							0.241233	0.229118	0.123216	0.357463							0.0120146	0.0467067	0.956502	0.114775							0.207368	0.0665981	0.00796379
0.208671	0.140686	0.0682478	0.136321	0.0841643								1.02991	0.129198	0.0475719	0.278723							0.0845455	0.0842935	0.0801763	0.261556							0.201172	0.0682991	0.0557411	0.0363329							0.0490685	0.0740431	0.118506
0.133647	0.0666534	0.187472	0.198752	0.262081								0.112224	0.361921	0.0719356	0.380626							0.0424544	0.0821715	0.125624	0.379173							0.168566	0.268286	0.0718307	0.0950465							0.292839	0.192155	0.15399
0.15557	0.0375784	0.0774181	0.240086	0.0984802								0.255559	0.0843871	0.0292843	0.155937							0.152103	0.121047	0.0375684	0.0482105							0.639917	0.196844	0.118482	0.0836778							0.075131	0.234333	0.130113
0.00914199	0.130813	0.123795	0.404648	0.092167								0.126354	0.0931551	0.0303819	0.131194							0.170615	0.246633	0.0982603	0.162199							0.061932	0.166189	0.169575	0.0224677							0.134036	0.193895	0.254361
0.102136	0.298492	0.186823	0.276978	0.143563								0.268035	0.0771833	0.0446362	0.156137							0.176908	0.197637	0.0690495	0.196209							0.0436961	0.0739243	0.212754	0.269414							0.0398738	0.224703	0.116067
0.176335	0.286516	0.326583	0.103294	0.175438								0.254218	0.251619	0.0448014	0.294305							0.0905985	0.0904547	0.0291578	0.20377							0.0966161	0.101057	0.355497	0.41784							0.193333	0.0992564	0.224961
0.259885	0.111516	0.217309	0.17096	0.018941								0.122819	0.15476	0.00843211	0.256219							0.0534158	0.562544	0.0496046	0.214309							0.215219	0.275149	0.17465	0.280771							0.0166742	0.0746657	0.0764806
0.0808858	0.182628	0.128483	0.106018	0.0472617								0.239535	0.479814	0.0241646	0.153463							0.0681059	0.102849	0.236083	0.148331							0.153984	0.131657	0.279581	0.159091							0.219463	0.205503	0.0589905
0.0747097	0.255789	0.166555	0.0796541	0.168433								0.264999	0.19604	0.0723796	0.178576							0.222648	0.125729	0.0519764	0.186459							0.117936	0.14418	0.0794332	0.101999							0.0531087	0.0249978	0.0328062
0.076975	0.0814347	0.0948556	0.166811	0.215367								0.283108	0.0822735	0.162507	0.0414165							0.317288	0.147794	0.0914445	0.909289							0.0838832	0.209608	0.0567091	0.138149							0.17307	0.253763	0.0659084
0.803385	0.260746	0.0993367	0.259903	0.0514434								0.295552	0.22538	0.116779	0.0937616							0.50381	0.0918979	0.134625	0.0831423							0.0966217	0.161855	0.0859732	0.241724							0.0257034	0.14893	0.104735
0.1676	0.206921	0.123375	0.208999	0.118558								0.197674	0.0912252	0.0522232	0.143688							0.364366	0.204327	0.346367	0.0903238							0.0960733	0.132126	0.0508826	0.311352							0.0860457	0.0982193	0.0344753
0.157713	0.314251	0.072869	0.0443802	0.20576								0.102239	0.17739	0.107818	0.300137							0.0356771	0.150707	0.202098	0.10721							0.0934934	0.274738	0.0604606	0.271759							0.0548831	0.00969824	0.0941675
0.0865272	0.180002	0.134985	0.185303	0.393709								0.134753	0.0998652	0.147759	0.0641133							0.383052	0.139196	0.132454	0.218466							0.121455	0.069173	0.0139071	0.0589743							0.0156707	0.0555222	0.125717
0.188969	0.160696	0.162305	0.125149	0.265706								0.206779	0.144581	0.0196801	0.0747983							0.514219	0.105479	0.106964	0.0819684							0.398311	0.142525	0.0461279	0.0903684							0.222191	0.0297273	0.083378
0.0877548	0.173153	0.0319396	0.178305	0.164654								0.17616	0.128663	0.0848925	0.232487							0.300476	0.0517502	0.142723	0.0747872							0.0325035	0.124746	0.0358312	0.394779							0.0825532	0.0536124	0.105087
0.254443	0.176803	0.0842276	0.119689	0.277521								0.242935	0.151003	0.111998	0.162872							0.307463	0.127653	0.0420256	0.0497169							0.0696338	0.300674	0.0528756	0.127682							0.073509	0.0540321	0.253236
0.251017	0.0213368	0.0682964	0.0273751	0.0577534								0.194474	0.0805553	0.0193801	0.155349							0.225663	0.109311	0.116735	0.0157977							0.113323	0.168986	0.192207	0.138692							0.110946	0.11918	0.245612
0.180503	0.108368	0.197155	0.0645986	0.0505657								0.072794	0.0377751	0.0433469	0.0738927							0.061259	0.0604428	0.0898392	0.0445695							0.0411658	0.143427	0.185398	0.0775657							0.0835411	0.0324047	0.128993
0.343394	0.152919	0.123995	0.167706	0.190736								0.15852	0.185089	0.950231	1.0648							0.0464462	0.154438	0.140612	0.0393927							0.131462	0.105146	0.0721848	0.0828636							0.172781	0.0364279	0.181672
0.0970637	0.850176	0.262352	0.178416	0.114589								0.0554222	0.317756	0.0565956	0.0652651							0.115601	0.27899	0.0759547	0.102847							0.0408477	0.228785	0.0385246	0.0607255							0.0492428	0.0306121	0.105292
0.0905071	0.014323	0.0305149	0.0488185	0.021524								0.0617225	0.0708604	0.117767	0.243453							0.223716	0.102593	0.0257512	0.169164							0.0911294	0.909713	0.059293	0.321991							0.0347616	0.315504	0.0606821
0.210708	0.221957	0.176975	0.152468	0.0627226								0.321272	0.24676	0.177028	0.06815							0.180076	0.134383	0.0387666	0.236576							0.0511657	0.0686286	0.0399868	0.230865							0.0504553	0.0343121	0.306463
0.278248	0.248385	0.0525337	0.0872798	0.0834404								0.0820729	0.267402	0.239394	0.350457							0.144157	0.181074	0.25835	0.0069323							0.0339443	0.121436	0.15944	0.055389							0.13575	0.15519	0.169251
0.136901	0.339821	0.0440908	0.180985	0.291597								0.141012	0.211277	0.134009	0.295425							0.0814786	0.140429	0.285111	0.17764							0.0786487	0.437967	0.31317	0.148333							0.20043	0.121027	0.0717148
0.11728	0.590606	0.27748	0.121231	0.318475								0.169837	0.104002	0.139989	0.26306							0.260875	0.0836965	0.114818	0.24812							0.0337515	0.0333017	0.0716051	0.220061							0.187682	0.0311155	0.179241
0.241102	0.222588	0.557043	0.0491611	0.0436274								0.782454	0.256822	0.107753	0.194244							0.228059	0.0666553	0.114823	0.111554							0.0436268	0.171376	0.174964	0.115974							0.191884	0.223321	0.668692
0.0484134	0.0705802	0.204087	0.155374	0.128667								0.134103	0.279117	0.106135	0.235737							0.345489	0.0371848	0.0956747	0.405863							0.0382401	0.169078	0.264195	0.119672							0.187862	0.0956681	0.246689
0.140433	0.265706	0.0645345	0.0876386	0.20509								0.138235	0.19004	0.130475	0.0868593							0.0760867	0.0527789	0.38519	0.154557							0.0771818	0.106652	0.177783	0.552605							0.0881556	0.12152	0.0883291
0.0881137	0.0481215	0.108011	0.117005	0.0763296								0.178896	0.121493	0.160606	0.148719							0.12248	0.0655082	0.021545	0.201732							0.120532	0.055245	0.117051	0.123985							0.0957229	0.288374	0.0384666
0.10912	0.642363	0.195827	0.179519	0.828415								0.15629	0.145599	0.0749688	0.0777114							0.0505172	0.253049	0.062416	0.179278							0.119718	0.0474008	0.232357	0.138437							0.0950821	0.18792	0.0899359
0.13931	0.0510881	0.214975	0.102176	0.0970884								0.301662	0.334476	0.336613	0.165385							0.0513483	0.319459	0.0430166	0.111387							0.116544	0.137321	0.0551281	0.155026							0.269401	0.091112	0.0910375
0.113835	0.242866	0.212323	0.243679	0.126885								0.125746	0.0854588	0.0933877	0.357806							0.319968	0.281711	0.17695	0.70239							0.0948929	0.0274504	0.0211141	0.210952							0.0554924	0.122523	0.102712
0.194289	0.139389	0.0982742	0.0820886	0.319976								0.0863721	0.131154	0.0788084	0.0637343							0.114805	0.129156	0.077269	0.178967							0.112105	0.100958	0.0798595	0.163626							0.114977	0.233556	0.516204
0.119347	0.0347635	0.223143	0.0995775	0.0761034								0.0518942	0.0239227	0.0758664	0.106648							0.11364	0.294559	0.0371061	0.126484							0.0703606	0.15116	0.0730136	0.0474187							0.294317	0.100482	0.0877202
0.16971	0.205416	0.561455	0.050121	0.245519								0.165515	0.223138	0.1542	0.150689							0.0251302	0.238934	0.224967	0.250949							0.071664	0.110571	0.121536	0.0627049							0.0514795	0.112813	0.0968941
0.320583	0.246408	0.104802	0.217036	0.0351589								0.0242863	0.259266	0.204392	0.158565							0.284397	0.119363	0.418371	0.14706							0.0934868	0.12022	0.234605	0.0101395							0.1519	0.0483513	0.163483
0.215469	0.257265	0.115184	0.0163042	0.128942								0.324384	0.10344	0.104595	0.0996598							0.284776	0.0942892	0.240693	0.172322							0.172585	0.0725696	0.405496	0.092826							0.100472	0.227088	0.0700314
0.234662	0.184495	0.120925	0.155991	0.121077								0.259896	0.0659808	0.628458	0.114854							0.172017	0.0350491	0.0992313	0.270321							0.0902861	0.0916526	0.172175	0.0320971							0.135871	0.0811389	0.0401889
0.174601	0.12254	0.0593737	0.109949	0.116615								0.289397	0.139036	0.0984944	0.101322							0.229065	0.650117	0.0950689	0.138397							0.128139	0.0228793	0.186025	0.0345441							0.0842452	0.40754	0.235133
0.0924338	0.406316	0.0837379	0.165385	0.191215								0.182088	0.377467	0.167634	0.0488665							0.0935827	0.099257	0.0827198	0.174676							0.0636277	0.0226766	0.0567309	0.0644902							0.0985812	0.27463	0.131962
0.0214259	0.18772	0.173856	0.0772093	0.0749052								0.115748	0.072855	0.182372	0.177139							0.198377	0.0735908	0.199702	0.0936396							0.0555473	0.150962	0.0297118	0.0375407							0.0956959	0.0540974	0.0423023
0.104929	0.235513	0.264612	0.0891395	0.298782								0.0588992	0.00452394	0.21997	0.113992							0.185069	0.0921141	0.254257	0.206484							0.269984	0.136289	0.208296	0.0457513							0.170094	0.0361365	0.0368277
0.0256181	0.155692	0.0681371	0.0796269	0.282632								0.187535	0.0866525	0.219042	0.162725							0.19813	0.0959411	0.113009	0.21832							0.255368	0.176034	0.0610952	0.13075							0.112619	0.109056	0.162193
0.142883	0.180187	0.170991	0.152418	0.146663								0.124291	0.125656	0.233207	0.220602							0.0884659	0.228883	0.0370286	0.0879588							0.22618	0.036747	0.0783167	0.111868							0.0322181	0.171555	0.123469
0.0404341	0.233727	0.102683	0.115503	0.170597								0.29601	0.131603	0.258363	0.252428							0.147569	0.215631	0.12646	0.0249679							0.019725	0.251486	0.185204	0.0423051							0.0715211	0.0630287	0.276744
0.181286	0.285113	0.20437	0.226526	0.260008								0.44818	0.119557	0.14404	0.29799							0.13935	0.0268198	0.0785617	0.193074							0.26794	0.102916	0.217963	0.0585616							0.0107322	0.0638267	0.0620515
0.124149	0.182464	0.0412558	0.0736294	0.173086								0.117394	0.165579	0.0302093	0.134578							0.146178	0.106297	0.287821	0.304412							0.193903	0.0287901	0.136713	0.206611							0.0796373	0.110622	0.0552708
0.880444	0.0429419	0.0765245	0.161776	0.0732383								0.023714	0.230302	0.186123	0.138717							0.291372	0.0551912	0.0840495	0.0326511							0.10052	0.116319	0.100332	0.106344							0.0999643	0.0593063	0.0838825
0.276714	0.19981	0.314673	0.135484	0.138031								0.285501	0.0253906	0.0634228	0.109496							0.168792	0.202289	0.155035	0.0583119							0.168628	0.295383	0.117673	0.0612612							0.0746223	0.134021	0.0568467
0.124472	0.109696	0.181888	0.113716	0.256732								0.215326	0.162238	0.205544	0.202937							0.0751201	0.253289	0.0523711	0.109756							0.228967	0.224021	0.205267	0.281831							0.102073	0.120034	0.165402
0.0510805	0.0895551	0.142895	0.087178	0.146575								0.381515	0.164896	0.161184	0.0649948							0.196133	0.0858993	0.306694	0.260802							0.142302	0.0684272	0.0906167	0.0523063							0.0992359	0.0450146	0.162808
0.19181	0.109791	0.1487	0.0770502	0.214926								0.109868	0.115279	0.0703126	0.141378							0.166589	0.814614	0.24829	0.0885385							0.175061	0.258837	0.104084	0.0609008							0.193086	0.0930259	0.029368
0.0553545	0.110744	0.0303267	0.231064	0.206308								0.380434	0.226666	0.179718	0.0635008							0.0401294	0.173181	0.221992	0.283338							0.14669	0.132363	0.104718	0.045607							0.137236	0.0733687	0.0763726
0.053459	0.169415	0.0403042	0.647855	0.167603								0.121787	0.190013	0.528588	0.0468564							0.108787	0.237755	0.0589103	0.0974173							0.127848	0.295557	0.0528803	0.060677							0.308863	0.0455222	0.10059
0.0986005	0.318683	0.119819	0.110279	0.295067								0.0637802	0.131179	0.203047	0.248323							0.129064	0.243067	0.261097	0.113571							0.209884	0.144634	0.236307	0.379178							0.132	0.124184	0.011376
0.153438	0.2478	0.202867	0.22402	0.167181								0.147791	0.257208	0.148186	0.0606958							0.144257	0.442153	0.261235	0.263876							0.195028	0.0277035	0.0714989	0.0610736							0.0889608	0.165883	0.199734
0.156046	0.134898	0.119994	0.251634	0.24437								0.0701878	0.262135	0.130627	0.316206							0.186687	0.178792	0.197774	0.219614							0.171015	0.162576	0.0426406	0.129505							0.085917	0.107157	0.132227
0.196045	0.13588	0.0145896	0.270686	0.232916								0.181043	0.1291	0.177183	0.0688983							0.121274	0.162898	0.114801	0.149755							0.223436	0.249712	0.0649757	0.258068							0.104048	0.180541	0.175562
0.0693541	0.0570135	0.0799004	0.159706	0.406619								0.167113	0.150503	0.182602	0.189256							0.27711	0.119223	0.177771	0.025746							0.158155	0.0747698	0.135334	0.0976153							0.0867877	0.129014	0.166874
0.0651142	0.176899	0.061379	0.299265	0.171772								0.132598	0.0995916	0.0437506	0.261662							0.0358793	0.161244	0.247974	0.0174099							0.186993	0.216591	0.121554	0.0803716							0.360805	0.0967594	0.113291
0.210383	0.270195	0.16677	0.22474	0.231244								0.0832017	0.17382	0.144486	0.031166							0.17985	0.104682	0.322572	0.240608							0.279261	0.173702	0.0300654	0.0589188							0.0186121	0.116198	0.121015
0.0758586	0.283438	0.169773	0.188271	0.29348								0.110996	0.254315	0.310243	0.117208							0.276432	0.0674479	0.227209	0.208871							0.0457885	0.170405	0.0954928	0.0621305							0.139011	0.16455	0.161212
0.258867	0.0179962	0.152109	0.0977089	0.297824								0.217341	0.0546391	0.135421	0.147434							0.0908395	0.0439485	0.0266221	0.172267							0.0586644	0.873201	0.0967062	0.112983							0.259038	0.0788569	0.192974
0.0712949	0.0149596	0.123309	0.176428	0.203535								0.14827	0.190477	0.246769	0.214304							0.11379	0.10012	0.134727	0.0368961							0.0345808	0.084873	0.23765	0.149008							0.132664	0.106064	0.0617753
0.195808	0.0846046	0.187694	0.0812581	0.0914495								0.108795	0.139178	0.0447481	0.0943991							0.207348	0.179097	0.08112	0.173906							0.041249	0.0344891	0.148792	0.0494937							0.112628	0.0306091	0.0746538
0.103169	0.085857	0.190509	0.133243	0.0533601								0.166618	0.0904313	0.125331	0.220543							0.0549516	0.165879	0.142577	0.211544							0.0433701	0.146326	0.101265	0.0897128							0.100094	0.123662	0.0947114
0.453317	0.145811	0.125659	0.0663067	0.299239								0.133267	0.214781	0.160528	0.143761							0.0696546	0.256339	0.203761	0.301946							0.163672	0.0331627	0.256599	0.11973							0.0672872	0.0540708	0.249512
0.196972	0.125929	0.292575	0.0779146	0.108484								0.117765	0.106283	0.0671163	0.107083							0.0839376	0.14685	0.228723	0.212803							0.0518947	0.106433	0.18497	0.0832849							0.151281	0.0724113	0.0786919
0.114171	0.168769	0.210982	0.142558	0.0141832								0.11486	0.19256	0.204225	0.0573559							0.0173661	0.144283	0.134396	0.316049							0.0987503	0.0357984	0.070656	0.0300017							0.0641671	1.01762	0.212927
0.108625	0.0269073	0.308066	0.10469	0.0883764								0.182108	0.0742701	0.178841	0.242855							0.102126	0.28216	0.193449	0.0670142							0.223648	0.232051	0.189109	0.0685912							0.173476	0.0755807	0.0623246
0.113749	0.293139	0.45506	0.0598796	0.0776126								0.0250578	0.11931	0.14465	0.298961							0.950817	0.189181	0.218716	0.142739							0.13562	0.118699	0.182219	0.110779							0.213583	0.0792893	0.0730154
0.244173	0.0731278	0.246455	0.0694671	0.19672								0.192494	0.237981	0.375173	0.125674							0.157676	0.0866884	0.237202	0.522556							0.802286	0.106164	0.180255	0.0364354							0.0660281	0.0577747	0.0572184
0.135879	0.129002	0.156432	0.126878	0.224126								0.273641	0.214938	0.375211	0.750457							0.0820275	0.135316	0.169264	0.439251							0.0541258	0.0644887	0.175638	0.0867653							0.959109	0.0727921	0.159807
0.26434	0.241735	0.10081	0.167685	0.0637398								0.16938	0.171575	0.145193	0.307642							0.114641	0.0280506	0.0514515	0.113617							0.0951297	0.179079	0.0933053	0.207381							0.122113	0.076324	0.0751438
0.0107672	0.217296	0.13428	0.304758	0.156513								0.11576	0.147158	0.308405	0.023229							0.0618494	0.107794	0.836691	0.120321							0.27205	0.188229	0.355615	0.162399							0.120555	0.0991357	0.0492214
0.161529	0.0896804	0.0580242	0.0595209	0.237735								0.239127	0.201984	0.187707	0.0420057							0.0201256	0.234059	0.165318	0.153912							0.250189	0.0530869	0.186397	0.0955355							0.0814139	0.103474	0.0917548
0.0890134	0.169758	0.0673405	0.0484964	0.069802								0.12839	0.209164	0.0869349	0.119579							0.281589	0.127667	0.0891563	0.268808							0.183032	0.230619	0.1194	0.0581961							0.149137	0.046618	0.0609362
0.143721	0.33989	0.260131	0.401646	0.113997								0.0238455	0.155164	0.165645	0.0966838							0.230068	0.295722	0.171315	0.0658821							0.2199	0.167593	0.121931	0.370344							0.0903527	0.1456	0.11386
0.23322	0.191034	0.0460208	0.0718927	0.243832								0.185191	0.118917	0.120688	0.100745							0.111417	0.223057	0.268935	0.195336							0.187723	0.0248103	0.0933587	0.12195							0.0234372	0.071719	0.0667777
0.370602	0.0716153	0.393201	0.250011	0.187753								0.253994	0.0762114	0.0374982	0.0867616							0.0646746	0.123993	0.280111	0.0342544							0.0137877	0.0633102	0.13111	0.0890884							0.0577604	0.0892151	0.105963
0.305742	0.188415	0.192759	0.182729	0.157255								0.109184	0.0650525	0.450953	0.0479281							0.113037	0.085878	0.0884422	0.26943							0.280972	0.0705548	0.114138	0.0209119							0.0352728	0.124164	0.0966807
0.0809643	0.124615	0.228515	0.0526156	0.09576								0.0924892	0.0455787	0.238323	0.299379							0.281621	0.0749608	0.157157	0.146197							0.170269	0.145316	0.220239	0.0862216							0.082108	0.0678527	0.0974891
0.291047	1.04928	0.0702306	0.126112	0.117866								0.0852039	0.293797	0.240404	0.157414							0.118537	0.0246489	0.0931212	0.0761646							0.220175	0.192142	0.114323	0.0942913							0.11245	0.0474272	0.0999863
0.0988716	0.900735	0.0886219	0.0856629	0.185476								0.158937	0.0150836	0.193794	0.307739							0.067652	0.0822002	0.0751602	0.169689							0.0331156	0.0603763	0.0947026	0.0565431							0.229183	0.0285196	0.34693
0.123106	0.132582	0.0507074	0.623281	0.467446								0.162256	0.0174406	0.034768	0.250149							0.198269	0.0429735	0.0176264	0.134518							0.0875686	0.187571	0.0144393	0.0628034							0.228123	0.151642	0.0371072
0.195904	0.184599	0.127435	0.0550545	0.197198								0.101601	0.0601675	0.259222	0.247606							0.454782	0.194115	0.0417877	0.334633							0.136	0.137264	0.177638	0.178352							0.164061	0.0739515	0.076189
0.172471	0.0595246	0.112538	0.0867693	0.034346								0.0926949	0.211516	0.153764	0.158069							0.130428	0.182139	0.048959	0.221536							0.0442814	0.0233798	0.0731713	0.038226							0.164473	0.158154	0.0166183
0.109924	0.0582768	0.171448	0.119698	0.133953								0.0719395	0.199478	0.167938	0.199201							0.140679	0.0986151	0.0303391	0.22376							0.407424	0.112856	0.153497	0.0450304							0.112517	0.0561848	0.128031
0.0434696	0.167106	0.0183886	0.107489	0.190409								0.0855452	0.0558669	0.148925	0.472147							0.120395	0.0945303	0.11305	0.0209782							0.0648258	0.056808	0.183831	0.0389716							0.0503985	0.108829	0.0689154
0.0837509	0.0520066	0.101481	0.170197	0.0526019								0.0968201	0.0853664	0.18126	0.21209							0.16959	0.0422755	0.142818	0.176418							0.126623	0.201588	0.119142	0.141656							0.343321	0.0897316	0.182157
0.119268	0.0958827	0.268591	0.235614	0.218107								0.0182117	0.0758486	0.24258	0.0966315							0.201094	0.0658454	0.12397	0.0900928							0.283868	0.194036	0.218273	0.0911219							0.143915	0.0851018	0.060308
0.28453	0.291164	0.0214782	0.0758924	0.159306								0.177739	0.539151	0.148743	0.153169							0.0463643	0.31849	0.134558	0.163517							0.12049	0.462069	0.157092	0.165518							0.082774	0.104282	0.143775
0.233094	0.114373	0.220075	0.16447	0.0409733								0.0531883	0.113191	0.0577913	0.211412							0.848049	0.0513537	0.172174	0.0584683							0.100212	0.448662	0.284306	0.117581							0.0695971	0.0997584	0.0297259
0.196433	0.0601134	0.121684	0.227568	0.306511								0.144769	0.209979	0.219836	0.286021							0.12312	0.204192	0.15896	0.184375							0.130695	0.170749	0.0999149	0.154388							0.0171676	0.23728	0.131359
0.125984	0.0282267	0.239265	0.335985	0.210991								0.201665	0.0552352	0.0491936	0.119532							0.114745	0.100735	0.433735	0.0593048							0.137531	0.162403	0.321933	0.309613							0.23241	0.0181243	0.129431
0.124629	0.104928	0.0852138	0.154948	0.115024								0.0931053	0.143328	0.0565609	0.843638							0.0258326	0.0508105	0.168116	0.266481							0.106541	0.338276	0.130996	0.0474349							0.161575	0.0486849	0.260749
0.170977	0.231165	0.124147	0.113274	0.207781								0.179399	0.137715	0.0251433	0.0627394							0.0478768	0.0582287	0.102486	0.196679							0.21251	0.153269	0.118267	0.385159							0.239096	0.0727507	0.109386
0.0849181	0.0041831	0.191698	0.095102	0.232157								0.146102	0.256221	0.0286054	0.171873							0.351501	0.057955	0.0970581	0.118878							0.133516	0.139655	0.193706	0.177319							0.0758566	0.148195	0.0882802
0.168228	0.250045	0.0483505	0.193304	0.119074								0.0550028	0.21737	0.108697	0.113279							0.131956	0.0602402	0.117664	0.279904							0.236022	0.10982	0.219812	0.252637							0.102133	0.126082	0.0506577
0.10539	0.203149	0.138918	0.150849	0.0886813								0.109774	0.108489	0.0574475	0.315801							0.0244216	0.0762812	0.310129	0.147196							0.051154	0.0227319	0.139951	0.303452							0.0978741	0.0252445	0.0873856
0.0375752	0.0988511	0.250772	0.345944	0.058837								0.101607	0.102741	0.187284	0.238524							0.151398	0.179329	0.0912301	0.180557							0.0781092	0.0728146	0.159874	0.294828							0.11458	0.106461	0.027709
0.218028	0.197617	0.160402	0.0355822	0.10323								0.417491	0.0467012	0.188753	0.146307							0.183354	0.224598	0.064783	0.0879362							0.0643271	0.12417	0.210968	0.170372							0.0655618	0.090578	0.044763
0.16602	0.139937	0.219076	0.171849	0.0735104								0.111739	0.0590915	0.0312424	0.225532							0.123431	0.0478546	0.202532	0.280596							0.316212	0.147678	0.150799	0.286637							0.274674	0.121341	0.168617
0.152278	0.146702	0.241514	0.146568	0.097769								0.0885776	0.132451	0.199949	0.194864							0.0431233	0.157484	0.11259	0.197121							0.217939	0.249085	0.31654	0.102287							0.211462	0.0962768	0.141866
0.137741	0.13421	0.102027	0.135187	0.150938								0.207701	0.147775	0.0199391	0.250651							0.0971524	0.125826	0.11961	0.13167							0.131294	0.0879356	0.128383	0.0596981							0.1777	0.0609925	0.166486
0.237412	0.133747	0.11102	0.332591	0.0548624								0.265587	0.194597	0.192987	0.149291							0.236938	0.0393107	0.0659426	0.0991953							0.326205	0.216272	0.144311	0.0444284							0.158315	0.096667	0.313785
0.303829	0.117809	0.373248	0.0604102	0.141918								0.0698792	0.0713218	0.180889	0.206613							0.201832	0.0583471	0.00292476	0.0812524							0.126351	0.162563	0.105104	0.111792							0.018334	0.109457	0.102887
0.197577	0.238097	0.367552	0.222107	0.119154								0.207043	0.0863008	0.0866486	0.252716							0.0600444	0.0863488	0.0528235	0.314052							0.153811	0.069736	0.0808546	0.0236159							0.119355	0.10714	0.209626
0.267561	0.259376	0.294773	0.0988686	0.112493								0.115447	0.213259	0.156784	0.241128							0.289554	0.0158064	0.0987401	0.304174							0.176009	0.0145702	0.171234	0.14115							0.127689	0.0778098	0.110492
0.141029	0.247638	0.222291	0.052655	0.0380874								0.275949	0.10186	0.126353	0.15337							0.272102	0.0725144	0.190633	0.18497							0.0341258	0.0824279	0.579051	0.120994							0.0182199	0.234018	0.210195
0.0550943	0.214448	0.121492	0.150598	0.300163								0.331969	0.250374	0.129862	0.0737221							0.126432	0.056233	0.273056	0.0470455							0.101916	0.118617	0.0341851	0.101903							0.0500683	0.172858	0.170956
0.09011	0.175058	0.0238619	0.375375	0.218271								0.50279	0.201002	0.140976	0.131707							0.133269	0.0259351	0.0643369	0.165156							0.0889858	0.0925131	0.165911	0.104948							0.0274218	0.108413	0.451954
0.107427	0.236488	0.188148	0.161724	0.288858								0.176706	0.228691	0.74894	0.183018							0.0779484	0.360359	0.0612128	0.378816							0.0303058	0.104901	0.259882	0.245068							0.108747	0.10221	0.20753
0.127265	0.100019	0.196102	0.170468	0.0960813								0.117007	0.0591045	0.00737312	0.139789							0.20731	0.149785	0.0543078	0.81555							0.0183696	0.151841	0.302167	0.272628							0.0711472	0.147554	0.0632277
0.148147	0.0693584	0.0760915	0.0827493	0.235822								0.0612546	0.203899	0.0473698	0.0526302							0.292767	0.121247	0.0228372	0.236398							0.0966809	0.1289	0.173643	0.00770929							0.0498274	0.0304863	0.122439
0.183507	0.180835	0.331132	0.167997	0.199617								0.0121863	0.12984	0.0446527	0.055417							0.16393	0.260618	0.0781695	0.171779							0.116896	0.414748	0.0901258	0.16129							0.085636	0.018696	0.291558
0.0441361	0.0887087	0.153159	0.235327	0.0321931								0.293941	0.107083	0.112913	0.118279							0.00567329	0.16799	0.054412	0.077445							0.142071	0.084066	0.1899	0.120212							0.059506	0.074079	0.0723357
0.130611	0.306574	0.0985238	0.326071	0.213177								0.129974	0.276913	0.195972	0.174788							0.0119864	0.0809954	0.141331	0.079272							0.237096	0.232713	0.290224	0.0711971							0.11197	0.172851	0.0229512
0.261766	0.221913	0.227105	0.161623	0.199435								0.0781104	0.380919	0.240786	0.0953368							0.0430491	0.0816842	0.306275	0.15512							0.271181	0.0532117	0.0643518	0.110328							0.0436807	0.305737	0.12526
0.299667	0.383461	0.277028	0.157765	0.045063								0.122118	0.221353	0.533452	0.24129							0.217872	0.175174	0.15257	0.126254							0.103652	0.243867	0.010709	0.127772							0.107832	0.0424783	0.0930159
0.125719	0.0586325	0.0592908	0.24477	0.13004								0.208659	0.233803	0.140512	0.195635							0.248074	0.180927	0.0260726	0.134754							0.151598	0.121268	0.00797293	0.0888844							0.173424	0.0647413	0.127045
0.0796966	0.158065	0.0541506	0.228705	0.0192448								0.153892	0.280829	1.07658	0.0536895							0.255885	0.201779	0.101823	0.0557929							0.158987	0.15202	0.0841359	0.0841088							0.112538	0.094909	0.135155
0.356755	0.0242642	0.0920117	0.0602393	0.0667665								0.17365	0.109269	0.189682	0.244132							0.160199	0.0469998	0.228098	0.0484571							0.0302353	0.189136	0.0812871	0.272472							0.285712	0.0694821	0.136018
0.0601382	0.174046	0.255403	0.174262	0.182584								0.107812	0.30219	0.186162	0.233898							0.297579	0.190531	0.170175	0.0906123							0.694948	0.133055	0.0336618	0.0400042							0.119053	0.224914	0.0717325
0.093646	0.105556	0.110985	0.0310707	0.0827977								0.112322	0.368528	0.107798	0.0652773							0.168496	0.119901	0.114323	0.0365457							0.638683	0.104233	0.153434	0.0433888							0.00531151	0.164416	0.26716
0.0780142	0.111874	0.159578	0.241703	0.130631								0.0346646	0.167982	0.268407	0.205764							0.22772	0.0597255	0.415248	0.103485							0.0209179	0.0675879	0.128789	0.674856							0.222468	0.1585	0.18761
0.0917251	0.305147	0.154361	0.404891	0.181505								0.102443	0.214121	0.209672	0.169966							0.135952	0.283061	0.107261	0.108412							0.324015	0.169194	0.0350814	0.0190196							0.0624011	0.035412	0.0935895
0.119401	0.19084	0.0210107	0.0488754	0.0829562								0.190984	0.376467	0.104633	0.355783							0.184206	0.102338	0.249739	0.023015							0.132546	0.12657	0.171962	0.31438							0.156735	0.0493911	0.0539808
0.180865	0.0850778	0.165265	0.083987	0.0793901								0.173033	0.232456	0.131378	0.195375							0.10779	0.0665039	0.130646	0.104029							0.161258	0.206605	0.157133	0.0831527							0.0197737	0.200283	0.133654
0.174203	0.115138	0.115219	0.187228	0.11052								0.146839	0.194144	0.112112	0.0867296							0.0578111	0.164474	0.214663	0.0793278							0.0855268	0.152939	0.114406	0.0512971							0.255526	0.0698717	0.013773
0.318254	0.102937	0.198915	0.0783441	0.098258								0.263511	0.247921	0.150143	0.319674							0.136435	0.137749	0.0356073	0.135311							0.217223	0.0596464	0.580981	0.0967497							0.33643	0.0458618	0.0624465
0.117218	0.131978	0.168177	0.110959	0.0783719								0.0170149	0.144251	0.0932651	0.792837							0.177767	0.698045	0.266348	0.0208481							0.0366742	0.0803181	0.128471	0.0401331							0.0685752	0.22879	0.0440114
0.0353024	0.193166	0.128672	0.228335	0.193736								0.0586492	0.221258	0.27611	0.144445							0.143797	0.197026	0.0125734	0.103908							0.152554	0.0896015	0.157275	0.0949938							0.12306	0.088939	0.104454
0.0993269	0.109913	0.170005	0.0517268	0.255021								0.133766	0.174312	0.104257	0.0558741							0.197723	0.129051	0.044187	0.218698							0.0618754	0.214208	0.246291	0.140401							0.0544895	0.255473	0.132425
0.0924088	0.167121	0.0590095	0.114781	0.105366								0.163271	0.150831	0.27271	0.0971557							0.16486	0.199705	0.0497714	0.0679898							0.243093	0.341615	0.0477786	0.012935							0.0703053	0.219061	0.0338071
0.224111	0.0890388	0.13148	0.153531	0.054287								0.209388	0.317269	0.244272	0.0961758							0.240534	0.331603	0.0441398	0.0733841							0.0384787	0.12584	0.217965	0.12988							0.075467	0.161405	0.18907
0.145142	0.373284	0.147836	0.0969717	0.104156								0.0534555	0.1032	0.154432	0.111213							0.176529	0.222753	0.134602	0.139947							0.128599	0.120827	0.240181	0.212362							0.0785617	0.2989	0.0349155
0.302364	0.352687	0.289128	0.125636	0.189582								0.104519	0.0198837	0.098455	0.183711							0.0954069	0.114199	0.260327	0.150453							0.304134	0.0494641	0.0731058	0.0264478							0.144153	0.10657	0.0544587
0.132153	0.0983775	0.0942091	0.149714	0.134655								0.164013	0.102196	0.191629	0.0882151							0.118663	0.154277	0.025529	0.316118							0.205593	0.0201125	0.197119	0.0634288							0.0531155	0.163247	0.0625546
0.358058	0.0768426	0.0915094	0.122064	0.12749								0.139626	0.136261	0.31147	0.419872							0.0814818	0.156386	0.243226	0.0726497							0.111645	0.0284543	0.187414	0.137502							0.0104291	0.103958	0.221673
0.0909828	0.128285	0.164617	0.107459	0.292116								0.214803	0.0823402	0.0723043	0.193402							0.107016	0.0848943	0.23266	0.161527							0.0864028	0.276422	0.149098	0.398796							0.0815691	0.136655	0.179298
0.146609	0.17604	0.193303	0.266225	0.217382								0.0788598	0.973731	0.143982	0.0838058							0.037062	0.0895763	0.183474	0.0309022							0.0643543	0.0741107	0.176601	0.230806							0.0790382	0.368522	0.218453
0.190272	0.0937162	0.160269	0.142453	0.13486								0.0540017	0.081883	0.158057	0.168386							0.152304	0.284211	0.374337	0.0261718							0.0870947	0.0162982	0.322617	0.24867							0.0895312	0.0474513	0.148223
0.154877	0.0522913	0.153043	0.8539	0.241711								0.140581	0.372589	0.27038	0.0371579							0.0990598	0.358202	0.307468	0.0675381							0.249189	0.036083	0.135252	0.173141							0.0743226	0.0908103	0.067395
0.130525	0.0466457	0.0351977	0.205282	0.316174								0.20047	0.0206103	0.380859	0.266834							0.370792	0.0968687	0.171325	0.204185							0.146367	0.0692569	0.122605	0.0543368							0.126773	0.138677	0.0693471
0.0342601	0.0943789	0.17964	0.19714	0.0147664								0.0752738	0.202546	0.155454	0.208791							0.252142	0.571815	0.704125	0.305197							0.170784	0.0665168	0.281898	0.183985							0.12321	0.288743	0.0750512
0.111831	0.0877765	0.0736423	0.259707	0.027822								0.0348767	0.417182	0.147045	0.4361							0.160598	0.699199	0.161168	0.120979							0.170184	0.046192	0.666346	0.127857							0.0386244	0.185813	0.184851
0.182233	0.0784254	0.180913	0.219955	0.291015								0.289197	0.130078	0.20622	0.0970338							0.162489	0.00908754	0.129485	0.202284							0.100264	0.112883	0.0787966	0.0814653							0.0622412	0.149113	0.10749
0.231646	0.0281107	0.183012	0.161093	0.124501								0.145405	0.913569	0.114914	0.187187							0.104276	0.103401	0.173533	0.151394							0.0448612	0.117745	0.0969081	0.157784							0.0457081	0.0386359	0.0694182
0.222934	0.361468	0.204422	0.16365	0.0910627								0.0703308	0.175311	0.169679	0.134682							0.219906	0.257997	0.108953	0.0901091							0.0961756	0.0533726	0.0363705	0.111129							0.140797	0.0167829	0.28775
0.255682	0.233278	0.205229	0.0932541	0.139329								0.352296	0.251494	0.320596	0.260286							0.184276	0.102011	0.0791779	0.0192733							0.0663595	0.052343	0.113321	0.240213							0.0152932	0.220587	0.197338
0.178897	0.200216	0.141307	0.190586	0.205139								0.00948225	0.145162	0.302031	0.201262							0.1567	0.290703	0.157752	0.04421							0.125974	0.179933	0.224815	0.0782381							0.149353	0.1282	0.191902
0.261994	0.188516	0.126031	0.0354693	0.158155								0.117224	0.167953	0.143829	0.0765213							0.0955247	0.0489245	0.197764	0.252475							0.1242	0.23319	0.0712898	0.0609544							0.128847	0.0906857	0.108648
0.181928	0.373618	0.284093	0.192382	0.11226								0.120044	0.339795	0.104779	0.14611							0.0865238	0.0725411	0.0657762	0.0253241							0.0903521	1.047	0.0502514	0.049523							0.286454	0.059902	0.00465083
0.169977	0.113836	0.215097	0.123509	0.137139								0.096604	0.198433	0.039833	0.192471							0.150265	0.227032	0.0449683	0.141922							0.335244	0.211338	0.0196067	0.0545962							0.0628908	0.0444597	0.0686053
0.0935456	0.216489	0.146745	0.234046	0.00804679								0.279298	0.0134923	0.179052	0.075419							0.0795765	0.375405	0.230539	0.0742529							0.532041	0.0341866	0.029238	0.0643998							0.0780419	0.0945179	0.183975
0.143767	0.216576	0.0961851	0.0858269	0.309749								0.0756435	0.0943938	0.227073	0.0173092							0.126237	0.175157	0.230525	0.0426588							0.108809	0.048716	0.188684	0.152802							0.0208858	0.180893	0.0833208
0.126141	0.324431	0.0557515	0.110414	0.242916								0.0558026	0.232793	0.135303	0.0822979							0.109764	0.101871	0.0599106	0.217883							0.089534	0.108945	0.0650822	0.162599							0.102636	0.264501	0.0979902
0.205374	0.155883	0.350296	0.0154649	0.122254								0.0685754	0.21811	0.18947	0.0973045							0.0785978	0.197984	0.0733338	0.15226							0.0732782	0.0852506	0.852582	0.252616							0.153442	0.343108	0.0533142
0.170704	0.0560857	0.382334	0.195473	0.0682041								0.202296	0.0407252	0.212319	0.077466							0.231255	0.223749	0.249609	0.229549							0.10654	0.0552503	0.192567	0.323793							0.188537	0.170477	0.046364
0.188322	0.122109	0.0491757	0.191106	0.281744								0.157433	0.16016	0.156108	0.13957							0.199231	0.314378	0.0638445	0.126354							0.10359	0.110595	0.172759	0.0301172							0.108497	0.0242617	0.1154
0.135057	0.128692	0.183576	0.232475	0.209965								0.131542	0.118872	0.199829	0.148583							0.284314	0.16156	0.106701	0.00585877							0.0906684	0.0695762	0.0852163	0.123295							0.0672549	0.108702	0.0513917
0.135212	0.197039	0.0565895	0.0804194	0.0874458								0.225416	0.149149	0.196738	0.0510614							0.139787	0.0384577	0.0588722	0.110842							0.0557041	0.19713	0.0780971	0.0921751							0.136745	0.126434	0.187304
0.067223	0.158001	0.199432	0.107398	0.0716425								0.0985548	0.0386558	0.0711614	0.0611516							0.173156	0.18995	0.279163	0.101688							0.0456478	0.238761	0.155985	0.107628							0.2027	0.10109	0.0437584
0.363675	0.195169	0.105148	0.0316156	0.329913								0.14749	0.156484	0.0615669	0.048643							0.198295	0.201345	0.0288882	0.125485							0.0935007	0.411091	0.0170852	0.151281							0.0640795	0.0338571	0.210176
0.104348	0.090443	0.185819	0.0926726	0.635099								0.144561	0.135272	0.220961	0.167056							0.153937	0.0929775	0.0707891	0.116201							0.0453793	0.188475	0.0400672	0.0860287							0.0129541	0.0555275	0.246164
0.100008	0.252978	0.29112	0.145513	0.162961								0.184472	0.184903	0.0864386	0.187761							0.102846	0.199245	0.0956755	0.0951365							0.0562021	0.173111	0.095541	0.180373							0.307383	0.133781	0.105949
0.259105	0.0886851	0.292263	0.176169	0.125532								0.310173	0.322434	0.127619	0.264663							0.0858599	0.217725	0.184916	0.0721157							0.302521	0.129038	0.035153	0.308246							0.0962941	0.0609521	0.0122406
0.168249	0.027357	0.175709	0.0556767	0.213669								0.12539	0.193731	0.113144	0.14911							0.0431042	0.264762	0.173368	0.208546							0.15172	0.211139	0.200861	0.141891							0.0813777	0.0157304	0.163803
0.122593	0.249462	0.0626178	0.0174712	0.157014								0.147995	0.0775782	0.0138447	0.177043							0.0679097	0.166948	0.279978	0.0506868							0.164751	0.04993	0.10996	0.0615006							0.0719536	0.0286848	0.0555313
0.219507	0.165976	0.204385	0.0949062	0.25173								0.244994	0.149241	0.986231	0.158232							0.0700136	0.304735	0.130107	0.0912588							0.357134	0.0616196	0.175693	0.133723							0.128845	0.0934489	0.107532
0.105707	0.1349	0.104711	0.156675	0.228159								0.274853	0.0180055	0.127877	0.115709							0.151481	0.166919	0.21577	0.0755904							0.30678	0.280318	0.146149	0.117543							0.179691	0.38222	0.112837
1.09598	0.153463	0.362629	0.110202	0.149278								0.250998	0.220311	0.0470472	0.0206121							0.0781152	0.287419	0.0695649	0.226452							0.254065	0.307514	0.0726889	0.191708							0.0670004	0.0298742	0.702469
0.215059	0.17856	0.179474	0.259508	0.318411								0.113463	0.134724	0.168411	0.222946							0.297439	0.218031	0.166454	0.0692494							0.153617	0.259615	0.00437604	0.0739863							0.083625	0.233352	0.187095
0.119993	0.15173	0.0866792	0.332758	0.187048								0.413892	0.198859	0.171657	0.211229							0.222191	0.168874	0.384142	0.130094							0.100857	0.117345	0.0690799	0.118808							0.104244	0.174255	0.1582
0.0452156	0.0564337	0.141469	0.081535	0.183185								0.116257	0.150696	0.0735635	0.262534							0.569682	0.164369	0.331887	0.116634							0.204488	0.245986	0.149819	0.207887							0.0159123	0.233819	0.0424896
0.0152398	0.134239	0.226307	0.0651615	0.200605								0.12784	0.137634	0.14562	0.127777							0.157456	0.169783	0.195595	0.155688							0.0686365	0.0325407	0.190269	0.0633935							0.083987	0.0930675	0.0165408
0.0979471	0.223927	0.178699	0.249522	0.111845								0.136111	0.226795	0.0925471	0.175149							0.173332	0.314053	0.27205	0.0830434							0.0273963	0.165733	0.106818	0.0857418							0.0680429	0.036664	0.0270708
0.357518	0.152357	0.157602	0.297765	0.0609694								0.125958	0.339196	0.106796	0.186841							0.342832	0.170135	0.185557	0.315451							0.00874789	0.111836	0.289706	0.0646549							0.0484256	0.0204551	0.0570554
0.0759907	0.254333	0.165401	0.208245	0.0594035								0.15326	0.109293	0.0451663	0.253031							0.112446	0.0171653	0.157704	0.100782							0.0724863	0.241958	0.0712223	0.159276							0.209555	0.255809	0.0722854
0.18125	0.0520361	0.22548	0.166619	0.0930851								0.0761535	0.113747	0.138702	0.105242							0.183232	0.0811558	0.688461	0.0822287							0.060965	0.377341	0.0490471	0.20834							0.175471	0.154181	0.0882124
0.132686	0.0538158	0.210642	0.16763	0.524669								0.159261	0.265108	0.109255	0.187505							0.121171	0.151743	0.179217	0.119005							0.0556093	0.140191	0.0470996	0.124669							0.125953	0.159483	0.0198881
0.0367404	0.300528	0.183637	0.16347	0.218255								0.183151	0.186945	0.249448	0.0957798							0.0612314	0.180124	0.0881396	0.049437							0.0882703	0.10384	0.147919	0.0467943							0.336887	0.266853	0.0346303
0.340746	0.0268686	0.236375	0.061849	0.0479267								0.0579716	0.288375	0.00375806	0.0703							0.17629	0.022751	0.0435929	0.101921							0.0554004	0.0924631	0.100946	0.113601							0.0671192	0.186183	0.15141
0.265822	0.108609	0.0716821	0.289007	0.0434175								0.213522	0.0986643	0.182918	0.0891177							0.169123	0.296492	0.0234218	0.040789							0.0206394	0.0261563	0.0412563	0.146936							0.167318	0.19932	0.366465
0.10061	0.154449	0.0829499	0.0467518	0.0518453								0.432462	0.238349	0.171562	0.0730544							0.0984912	0.0719137	0.0250809	0.120792							0.119028	0.105809	0.0807559	0.0360856							0.0436849	0.115551	0.0565365
0.0882761	0.119867	0.106502	0.323376	0.152112								0.0626161	0.133598	0.23278	0.093237							0.196166	0.152439	0.164946	0.0549978							0.036841	0.101756	0.0583713	0.136043							0.103089	0.0982427	0.122969
0.203506	0.0379832	0.131767	0.143598	0.232426								0.109658	0.117511	0.216205	0.02594							0.193733	0.0920778	0.162182	0.10798							0.104824	0.0649766	0.0639434	0.223995							0.0610457	0.260651	0.0385694
0.0937597	0.198325	0.0565131	0.268652	0.0185239								0.28735	0.310426	0.259404	0.0362748							0.124015	0.227143	0.187458	1.00464							0.0588035	0.170515	0.0838912	0.300052							0.260354	0.124185	0.0483044
0.0598075	0.0982515	0.131164	0.137719	0.220736								0.123858	0.248258	0.114544	0.0844352							0.110689	0.213631	0.350772	0.242595							0.0769888	0.126567	0.22641	0.10968							0.34641	0.0345909	0.0793534
0.0969815	0.168608	0.0857212	0.20253	0.170176								0.198323	0.292406	0.201521	0.0709535							0.0711798	0.247595	0.194563	0.273739							0.113601	0.269629	0.151422	0.367531							0.14474	0.0546689	0.0549135
0.445678	0.127832	0.266161	0.157376	0.203441								0.195402	0.28589	0.0666782	0.149928							0.0797302	0.0920858	0.0522692	0.07882							0.05012	0.277412	0.11861	0.266861							0.143986	0.119302	0.221517
0.232335	0.180217	0.149573	0.115465	0.251092								0.125821	0.0871968	0.0307591	0.112393							0.0711407	0.104561	0.139011	0.0987284							0.0552878	0.330043	0.126098	0.0334854							0.0191436	0.063367	0.0924911
0.216739	0.149587	0.162298	0.14716	0.26093								0.173219	0.104	0.458307	0.0813289							0.142155	0.56683	0.144895	0.115284							0.128875	0.0814443	0.0534775	0.0545795							0.126698	0.0610144	0.0699526
0.138438	0.203181	0.0735253	0.124874	0.187071								0.0716035	0.0796111	0.313768	0.0839309							0.0663613	0.338744	0.236337	0.27519							0.0537421	0.155845	0.153359	0.130491							0.132551	0.0354128	0.0638486
0.108358	0.0247427	0.131057	0.127474	0.134315								0.193182	0.112726	0.0542728	0.0615586							0.140246	0.202498	0.0889578	0.155461							0.0548664	0.181034	0.0558893	0.143208							0.123457	0.112103	0.0583057
0.109398	0.258525	0.271388	0.193486	0.171126								0.257153	0.0457982	0.275173	0.095463							0.0438006	0.326434	0.302037	0.100261							0.105666	0.26101	0.138468	0.0578336							0.143669	0.0453474	0.060214
0.181605	0.108061	0.311023	0.163039	0.10706								0.117264	0.0586252	0.238698	0.0297755							0.125381	0.3531	0.242018	0.344737							0.10154	0.366509	0.172564	0.147173							0.337261	0.0929646	0.105841
0.0769736	0.20949	0.333042	0.132093	0.159744								0.127304	0.0856921	0.252241	0.063834							0.11035	0.109113	0.165132	0.152083							0.317047	0.289107	0.306891	0.0772868							0.320227	0.0784112	0.103421
0.0396163	0.209116	0.236892	0.106239	0.0718072								0.0777704	0.0826338	0.128538	0.11807							0.673024	0.096001	0.26945	0.216346							0.312077	0.0964666	0.17152	0.187913							0.153697	0.0708261	0.269664
0.135458	0.0964737	0.0727304	0.0512557	0.170382								0.0886877	0.0701274	0.0928284	0.218883							0.618934	0.690589	0.205349	0.0971559							0.0774046	0.110247	0.190858	0.085041							0.15348	0.0819501	0.038293
0.161828	0.226195	0.310218	0.162005	0.115401								0.0897516	0.0243825	0.1473	0.119551							0.222264	0.591101	0.246595	0.256721							0.218697	0.0702148	0.0389335	0.435764							0.0910693	0.0373833	0.161674
0.15345	0.0742632	0.0993837	0.121475	0.230172								0.250091	0.067918	0.114486	0.0254571							0.104792	0.0483862	0.0410464	0.0798939							0.199236	0.0786189	0.0809909	0.0246233							0.129046	0.0469873	0.0965767
0.325162	0.0989418	0.146862	0.205905	0.0529765								0.179975	0.254611	0.0576605	0.111835							0.114306	0.00775171	0.188644	0.0754894							0.352655	0.151985	0.0154987	0.0108336							0.139053	0.114755	0.0774573
0.0844599	0.352868	0.093542	0.185151	0.065081								0.128372	0.472838	0.343392	0.307708							0.03197	0.239552	0.112288	0.0821329							0.226576	0.255543	0.0728597	0.11708							0.247824	0.139457	0.0743696
0.126461	0.19511	0.313326	0.190524	0.0658755								0.140488	0.311309	0.0388641	0.285627							0.0465034	0.185812	0.114496	0.192456							0.0517124	0.0317034	0.11296	0.0876342							0.0716239	0.141865	0.112679
0.28664	0.0690762	0.106157	0.156907	0.00400378								0.406089	0.142734	0.196969	0.15366							0.149961	0.168471	0.0990747	0.361106							0.140985	0.117281	0.1253	0.0524568							0.116776	0.0711384	0.146712
0.0497139	0.108257	0.118897	0.0401277	0.114052								0.244039	0.141011	0.269499	0.339587							0.330971	0.19765	0.126372	0.225287							0.292371	0.162289	0.0643143	0.162264							0.255109	0.0783613	0.102202
0.201753	0.203808	0.127521	0.289837	0.10938								0.0820616	0.102654	0.0806537	0.161266							0.189569	0.225223	0.102184	0.131196							0.0790693	0.145304	0.156364	0.0336575							0.233801	0.150258	0.104808
0.0133816	0.145092	0.0347003	0.212342	0.167518								0.0582694	0.09137	0.212025	0.196624							0.0843596	0.140032	0.203599	0.358459							0.113884	0.289021	0.0627483	0.0724477							0.108317	0.310567	0.491085
0.0276573	0.285545	0.142601	0.0805868	0.141156								0.126302	0.0720574	0.239487	0.172807							0.0387075	0.0819856	0.117411	0.369643							0.104293	0.404957	0.0153185	0.11143							0.221444	0.00880092	0.395848
0.0736618	0.156138	0.188955	0.0896058	0.0287875								0.972683	0.19789	0.0606331	0.195024							0.115233	0.200774	0.0672227	0.0553774							0.0233538	0.0687286	0.0868476	0.269492							0.154697	0.0541111	0.0869023
0.117699	0.0273752	0.126321	0.199918	0.182786								0.232689	0.146285	0.308053	0.300119							0.0676143	0.196607	0.116645	0.413436							0.38712	0.0658668	0.0652923	0.323389							0.059715	0.0294647	0.0535708
0.193183	0.0900498	0.205746	0.474667	0.833701								0.122055	0.189068	0.081299	0.168614							0.0812146	0.251561	0.0449122	0.0483758							0.213625	0.141492	0.0190639	0.20747							0.090654	0.160639	0.115472
0.0929045	0.13094	0.0389987	0.1661	0.275399								0.121172	0.150069	0.0708546	0.116385							0.0215342	0.132943	0.125612	0.184879							0.249334	0.225302	0.16199	0.083179							0.0355054	0.147241	0.106982
0.0802397	0.342538	0.460862	0.136439	0.110718								0.245805	0.10862	0.0659981	0.49988							0.0998081	0.0579853	0.344677	0.253782							0.253478	0.0783637	0.0483028	0.147215							0.0954195	0.148917	0.0483924
0.0335661	0.0765844	0.195826	0.0816905	0.151379								0.130228	0.164061	0.161966	0.24233							0.263225	0.139031	0.18806	0.19932							0.148281	1.0399	0.0344059	0.275437							0.0194017	0.0914258	0.181221
0.214793	0.139321	0.178552	1.00939	0.145801								0.0708256	0.185369	0.0691994	0.0683502							0.302233	0.0700026	0.16565	0.294568							0.226636	0.0670939	0.0492927	0.261835							0.0316271	0.0493338	0.0855468
0.431147	0.195534	0.262502	0.102808	0.00846502								0.143214	0.119551	0.0451216	0.069809							0.218094	0.16615	0.183355	0.220681							0.166423	0.222	0.139632	0.140753							0.061049	0.116041	0.0692955
0.0950666	0.128508	0.0932505	0.173322	0.0329614								0.0289588	0.0479969	0.39452	0.195557							0.259798	0.0324133	0.163305	0.0562083							0.0733632	0.17912	0.0809261	0.229536							0.249097	0.217785	0.0687182
0.155864	0.099194	0.0145935	0.294354	0.200628								0.218245	0.322366	0.196498	0.152086							0.127062	0.257601	0.193742	0.0399776							0.106052	0.254589	0.201312	0.0285869							0.273951	0.22792	0.050292
0.167293	0.347014	0.217527	0.254588	0.189748								0.292525	0.145286	0.0213911	0.0447255							0.155716	1.05707	0.306035	0.0796858							0.18902	0.00822761	0.108705	0.081714							0.460856	0.0335645	0.0488887
0.206746	0.295208	0.17281	0.0924802	0.289368								0.261245	0.105904	0.0904688	0.337262							0.178273	0.196092	0.23954	0.144662							0.222142	0.0465839	0.235415	0.190728							0.339253	0.0968157	0.0296354
0.330917	0.112096	0.173921	0.0732883	0.399872								0.241188	0.671733	0.197666	0.0273447							0.0674896	0.476352	0.124016	0.0281358							0.181827	0.119638	0.192515	0.146761							0.146422	0.0425181	0.050874
0.114326	0.244417	0.162868	0.171627	0.182446								0.231546	0.230639	0.200573	0.162045							0.0281464	0.189752	0.28032	0.0616894							0.0409634	0.061975	0.0725127	0.206642							0.025466	0.00400591	0.230782
0.0533651	0.0498759	0.100766	0.141071	0.0903921								0.268211	0.220722	0.402395	0.12793							0.0522692	0.202832	0.249963	0.00369654							0.0369232	0.0836461	0.224072	0.205739							0.0847679	0.0879005	0.404935
0.204344	0.200169	0.143957	0.129613	0.302215								0.0218165	0.125171	0.18373	0.217875							0.0788336	0.156703	0.202593	0.0947887							0.0483572	0.106994	0.0989166	0.0985587							0.0464244	0.0764786	0.0322058
0.4137	0.0405198	0.113444	0.179635	0.273156								0.172203	0.322442	0.0634759	0.280916							0.177965	0.123426	0.0536905	0.0928908							0.0981697	0.0122297	0.0866318	0.0525073							0.037654	0.11307	0.0901399
0.112417	0.0456514	0.0144533	0.431041	0.00941001								0.0517534	0.0755568	0.170674	0.144277							0.271349	0.291054	0.159682	0.103573							0.083183	0.0607504	0.186185	0.0724956							0.0805758	0.0355246	0.291048
0.0812025	0.0732837	0.046726	0.0980981	0.960486								0.179192	0.0625777	0.319097	0.111192							0.257061	0.242184	0.123701	0.110261							0.154312	0.0817831	0.1215	0.0610816							0.145812	0.240426	0.148366
0.117109	0.0934639	0.161785	0.270051	0.081599								0.0978727	0.281874	0.116425	0.240276							0.164688	0.28308	0.283784	0.0798504							0.257436	0.0341079	0.179532	0.239358							0.0352281	0.211004	0.235978
0.0443677	0.146885	0.109142	0.0434671	0.214279								0.171648	0.0745628	0.340992	0.219733							0.1543	0.14031	0.0868416	0.0995668							0.247507	0.0375305	0.0634016	0.188362							0.00890494	0.575201	0.225096
0.146387	0.0499412	0.208103	0.165013	0.214075								0.244485	0.0493507	0.251509	0.197452							0.291803	0.0579874	0.15617	0.0205289							0.169662	0.051154	0.639406	0.144243							0.0646502	0.0941666	0.123206
0.0213546	0.5121	0.287246	0.292988	0.212023								0.0751335	0.120947	0.108357	0.746315							0.0280131	0.130916	0.0721207	0.269199							0.0400949	0.0569409	0.293969	0.118477							0.0347494	0.0555138	0.309812
0.192777	0.116062	0.10711	0.217079	0.0175774								0.198806	0.315532	0.0826046	0.177007							0.0970575	0.137588	0.0565334	0.144463							0.138113	0.0405101	0.555193	0.0619929							0.168042	0.152534	0.0159014
0.261829	0.106139	0.158401	0.270445	0.188698								0.142837	0.151507	0.216487	0.386592							0.183355	0.241456	0.0604059	0.0396415							0.137502	0.0215261	0.0708233	0.0575714							0.0604916	0.141642	0.165057
0.229801	0.0773019	0.208666	0.152656	0.0601725								0.174088	0.198558	0.0856378	0.0697018							0.0585402	0.231857	0.428034	0.0559631							0.0826868	0.117484	0.160362	0.127323							0.0152629	0.250245	0.0712886
0.0252278	0.269693	0.082285	0.213544	0.111805								0.817023	0.13297	0.185261	0.116974							0.0542627	0.301521	0.140007	0.143374							0.0173326	0.0358529	0.0443596	0.0876548							0.115995	0.24637	0.193181
0.168371	0.117727	0.261171	0.0559701	0.0487051								0.0675482	0.367187	0.183469	0.0698043							0.145815	0.232174	0.0968369	0.0274303							0.0744694	0.0354093	0.0573179	0.212345							0.334031	0.17397	0.077474
0.20387	0.141027	0.225296	0.301437	0.102994								0.3503	0.107523	0.268877	0.294719							0.229213	0.106324	0.0206839	0.0474913							0.0443037	0.102008	0.159093	0.198489							0.122127	0.0589603	0.117832
0.165857	0.0958104	0.278038	0.138164	0.138771								0.136667	0.21122	0.101377	0.125195							0.109867	0.160557	0.0184458	0.088572							0.129539	0.0277597	0.103231	0.166519							0.130244	0.141672	0.106877
0.102292	0.120808	0.125529	0.15496	0.15612								0.267521	0.302668	0.26801	0.170281							0.147803	0.0229436	0.135468	0.502348							0.0612213	0.138482	0.199455	0.0727458							0.310125	0.206615	0.145581
0.0503395	0.0825367	0.124073	0.114785	0.0738427								0.0746345	0.108028	0.0900916	0.0909467							0.312612	0.107979	0.0318843	0.102518							0.251244	0.0114664	0.354957	0.0514442							0.0266528	0.207553	0.159477
0.248066	0.032907	0.392278	0.205332	0.0871817								0.144949	0.116267	0.140338	0.0721124							0.0673096	0.0356336	0.108122	0.0910098							0.140915	0.0863558	0.0534153	0.0565961							0.327981	0.135782	0.101826
0.274641	0.174259	0.0740748	0.203823	0.108638								0.267394	0.210859	0.223617	0.241302							0.15613	0.0699007	0.364457	0.265116							0.0903342	0.132302	0.071188	0.112754							0.112163	0.126625	0.056581
0.0962636	0.0899624	0.0822874	0.0761882	0.160585								0.0862745	0.308977	0.0609463	0.0959919							0.0901659	0.0347732	0.27502	0.389718							0.316399	0.100194	0.0809399	0.106115							0.168563	0.113274	0.173888
0.0711219	0.227537	0.159459	0.0314944	0.162843								0.00753803	0.0962529	0.0216543	0.382154							0.102411	0.0339477	0.181142	0.0708174							0.133045	0.296334	0.076837	0.242899							0.188516	0.074643	0.1582
0.198325	0.0930874	0.272143	0.207951	0.285936								0.274525	0.185517	0.112217	0.154702							0.135621	0.169504	0.0729709	0.0208546							0.179275	0.166723	0.320403	0.0734738							0.0479018	0.103616	0.0312815
0.148879	0.201064	0.0992428	0.0326285	0.0777953								0.0691066	0.345195	0.0628396	0.108514							0.0329825	0.116674	0.142962	0.0783408							0.0841688	0.103694	0.207794	0.180568							0.077311	0.0339237	0.0687589
0.135519	0.292433	0.165106	0.123554	0.0520615								0.202802	0.118674	0.190367	0.0957914							0.0427479	0.145488	0.127378	0.114794							0.209427	0.284992	0.0774847	0.0707235							0.0890013	0.100843	0.0756667
0.0820399	0.0923386	0.0939697	0.15921	0.106891								0.22331	0.15213	0.52508	0.938011							0.3393	0.400849	0.0328083	0.189044							0.152888	0.158203	0.236667	0.0849512							0.147516	0.0320507	0.0914689
0.0667245	0.201258	0.12467	0.195611	0.201916								0.133306	0.141587	0.156969	0.329007							0.106673	0.134636	0.118184	0.0968486							0.300798	0.205648	0.157221	0.183485							0.0247542	0.145983	0.089104
0.273048	0.0454968	0.142386	0.182441	0.189963								0.506534	0.111561	0.292648	0.0431374							0.04088	0.328992	0.189602	0.173957							0.0776386	0.0679487	0.115141	0.246219							0.075123	0.10505	0.248601
0.0987049	0.110908	0.176154	0.145356	0.166664								0.0943223	0.157161	0.206007	0.125513							0.131048	0.102789	0.214282	0.13964							0.135614	0.241876	0.246856	0.0801043							0.0760856	0.0778106	0.0890901
0.0493198	0.0981895	0.151374	0.2482	0.0825638								0.103849	0.174382	0.11599	0.102111							0.231784	0.0612941	0.0432665	0.427582							0.397535	0.337819	0.144129	0.221233							0.147291	0.19126	0.0221818
0.114195	0.412067	0.204457	0.319588	0.0178752								0.242096	0.193903	0.263043	0.0352412							0.0784349	0.0834074	0.10537	0.0432609							0.0389201	0.161011	0.0647542	0.097614							0.0507429	0.0757465	0.150673
0.139726	0.459327	0.266265	0.944027	0.0342713								0.134439	0.221487	0.0594489	0.221639							0.0550547	0.0422763	0.0761932	0.0275241							0.292257	0.0413894	0.0693515	0.525012							0.0186949	0.142304	0.226076
0.141118	0.11494	0.634786	0.218166	0.107227								0.0347897	0.00521596	0.0942295	0.222068							0.0620883	0.166824	0.987606	0.11436							0.105965	0.0923181	0.104892	0.233501							0.0939146	0.0412109	0.113433
0.0431078	0.238626	0.0906136	0.13058	0.340292								0.197592	0.487089	0.0810899	0.126334							0.0985017	0.0909433	0.174889	0.0454826							0.214871	0.210785	0.0761674	0.247723							0.0113425	0.0362904	0.169804
0.112494	0.0107134	0.0320161	0.123469	0.629344								0.302842	0.241638	0.162083	0.0927203							0.0406224	0.189599	0.0425939	0.113041							0.229561	0.0700574	0.0941681	0.153018							0.111059	0.13766	0.060022
0.131342	0.107587	0.31387	0.211766	0.202661								0.027297	0.125607	0.0494173	0.30065							0.102652	0.123883	0.0570029	0.192499							0.033375	0.0087672	0.0857169	0.125229							0.0805426	0.120113	0.292944
0.0858489	0.0633413	0.0717763	0.133591	0.090862								0.256736	0.00748982	0.196085	0.139287							0.332887	0.0897533	0.0354941	0.175993							0.180693	0.188047	1.06944	0.089887							0.125892	0.0879116	0.0781655
0.149212	0.120653	0.0458504	0.0560338	0.0767996								0.0811805	0.234536	0.461593	0.0188737							0.257656	0.113003	0.0129145	0.297694							0.0668083	0.118241	0.158597	0.0836524							0.0944927	0.055058	0.143922
0.190033	0.15919	0.121355	0.177674	0.0915536								0.0748398	0.317946	0.211735	0.31976							0.153549	0.133227	0.282826	0.129246							0.0417557	0.0769654	0.214046	0.0822743							0.0413621	0.162985	0.421559
0.191903	0.0848006	0.152799	0.175358	0.120715								0.0634754	0.0963867	0.0982891	0.0933283							0.057372	0.0745234	0.0810356	0.105371							0.107597	0.0109449	0.201294	0.121903							0.0663467	0.138113	0.0851782
0.281914	0.0915312	0.0621691	0.349752	0.232262								0.184173	0.140515	0.108268	0.392561							0.0616531	0.0764571	0.288113	0.313526							0.0551582	0.176411	0.0792607	0.363218							0.0203684	0.0961293	0.386564
0.0721797	0.178506	0.217578	0.153107	0.145659								0.0764815	0.215451	0.0445925	0.141486							0.164878	0.294494	0.162509	0.139871							0.111671	0.341667	0.0189558	0.0652841							0.144674	0.089864	0.123202
0.18136	0.189949	0.133724	0.203981	0.170071								0.239876	0.316923	0.0237125	0.180144							0.257172	0.181309	0.0911357	0.229705							0.090858	0.183112	0.0672218	0.133033							0.0810247	0.127924	0.177422
0.103635	0.0720185	0.146206	0.187799	0.0895426								0.319986	0.0936324	0.0397422	0.172463							0.0629671	0.5688	0.148098	0.188206							0.255632	0.187074	0.116724	0.107489							0.0786637	0.207845	0.0673691
0.0508068	0.831199	0.200149	0.0808095	0.0343989								0.276145	0.233326	0.13102	0.316517							0.151172	0.219341	0.303474	0.0649045							0.257455	0.0658086	0.269068	0.0326399							0.131943	0.145878	0.0992901
0.11127	0.221585	0.169567	0.0644911	0.13602								0.37029	0.0627646	0.0824703	0.106098							0.0943598	0.427315	0.244436	0.339371							0.0642305	0.0770288	0.10429	0.0460281							0.0301211	0.122119	0.0467737
0.100164	0.225804	0.0421145	0.167196	0.0847157								0.140365	0.098954	0.0637605	0.0928153							0.311683	0.0143704	0.104929	0.240811							0.1455	0.0257475	0.340201	0.015881							0.0686314	0.0795652	0.244194
0.188572	0.0260195	0.183642	0.173608	0.149457								0.30857	0.185269	0.243508	0.11184							0.089102	0.154265	0.0860042	0.0751285							0.255701	0.0416121	0.169046	0.0518552							0.0697574	0.00468047	0.0792587
0.0963615	0.281231	0.156273	0.0889244	0.0568309								0.136005	0.0443358	0.464388	0.0960531							0.169799	0.190377	0.17958	0.15977							0.0463067	0.230966	0.117322	0.283846							0.204151	0.018046	0.186646
0.227088	0.0964017	0.631402	0.165396	0.081044								0.106047	0.246656	0.159432	0.0148725							0.0269706	0.1933	0.033114	0.112049							0.102989	0.152445	0.207722	0.213824							0.0297163	0.0504243	0.255401
0.0691502	0.0727668	0.163273	0.12892	0.0254759								0.292773	0.0664616	0.107252	0.154235							0.0394965	0.200045	0.124353	0.0341802							0.191764	0.0441606	0.0821701	0.100998							0.0996516	0.0496694	0.373503
0.350692	0.080594	0.163132	0.0925035	0.112175								0.0560759	0.205575	0.152731	0.221601							0.027326	0.114486	0.0601679	0.185882							0.0704254	0.0702804	0.245556	0.0694744							0.0482792	0.0903917	0.112005
0.13637	0.150557	0.238316	0.159646	0.00919577								0.0771872	0.247891	0.0957052	0.111894							0.0286616	0.161452	0.0721517	0.158472							0.172944	0.161263	0.296251	0.0733302							0.111104	0.135651	0.294933
0.144477	0.20195	0.210223	0.0588107	0.0264505								0.0872601	0.128414	0.0841495	0.157017							0.0598313	0.199548	0.0752257	0.113591							0.0959455	0.200069	0.134829	0.0798678							0.180586	0.0964741	0.0806635
0.119211	0.335188	0.11261	0.16577	0.0247072								0.234418	0.170276	0.137937	0.0230516							0.0394517	1.06446	0.146942	0.184137							0.162027	0.126196	0.187526	0.0450369							0.148983	0.0892249	0.19798
0.164316	0.137069	0.0970692	0.19969	0.129293								0.277649	0.0796535	0.733816	0.275757							0.707249	0.0638348	0.288517	0.052079							0.866734	0.059892	0.115646	0.0715344							0.383895	0.0665521	0.299204
0.0301288	0.175688	0.159175	0.036936	0.166443								0.0565541	0.207607	0.136131	0.0638117							0.149861	0.242763	0.072871	0.0427566							0.0206034	0.123872	0.0488859	0.0223687							0.121677	0.0929847	0.0929655
0.240547	0.295049	0.14721	0.165676	0.0767565								0.150441	0.268132	0.275473	0.132253							0.268198	0.0842255	0.230358	0.0910371							0.0237835	0.221732	0.0353139	0.26822							0.0608224	0.149585	0.0967663
0.0834418	0.13688	0.0971264	0.135602	0.739867								0.411021	0.38517	0.155941	0.194328							0.200069	0.0885841	0.262794	0.144968							0.0420514	0.172372	0.0311582	0.0797312							0.0286813	0.0845497	0.0971925
0.21593	0.181561	0.0781517	0.232308	0.179559								0.134335	0.139092	0.14392	0.0464217							0.305029	0.130142	0.0726198	0.270253							0.0307674	0.262749	0.0645376	0.0335349							0.198751	0.114566	0.152412
0.0782663	0.0829555	0.114003	0.0936034	0.156705								0.180371	0.233104	0.12794	0.132235							0.153476	0.712508	0.20663	0.177559							0.0430883	0.0721536	0.0964743	0.0854149							0.25421	0.0485438	0.0479313
0.10778	0.107873	0.064472	0.105707	0.167184								0.347997	0.20617	0.0543499	0.115986							0.0314105	0.0535886	0.0588456	0.0876633							0.0476027	0.111286	0.0348542	0.00396363							0.0605969	0.197998	0.0921172
0.10265	0.19464	0.101342	0.333762	0.20504								0.270446	0.20548	0.121368	0.29435							0.217602	0.236713	0.117167	0.0940531							0.0706882	0.182517	0.314938	0.0333063							0.135657	0.298597	0.126914
0.244726	0.181391	0.114032	0.316981	0.265836								0.327848	0.119076	0.160435	0.157965							0.531615	0.219663	0.0254008	0.0945972							0.0335635	0.161279	0.00890634	0.104453							0.132643	0.129983	0.17685
0.356493	0.119331	0.0667928	0.178436	0.213887								0.152881	0.0763755	0.0504079	0.379638							0.157809	0.170763	0.156507	0.238384							0.0395597	0.112418	0.029968	0.113208							0.238567	0.0766539	0.264206
0.0922054	0.427797	0.0193981	0.410613	0.239041								0.32043	0.0570526	0.852147	0.0567094							0.0556436	0.296628	0.154115	0.141426							0.0505336	0.137823	0.0328538	0.118545							0.139033	0.159419	0.151272
0.0928925	0.145679	0.204625	0.332301	0.0703207								0.0990286	0.150325	0.139766	0.00508137							0.273462	0.24371	0.095439	0.0315885							0.178655	0.101211	0.0519897	0.10799							0.11114	0.0712923	0.038806
0.10964	0.13379	0.0676347	0.148217	0.198284								0.141417	0.217049	0.211501	0.288225							0.0906799	0.0897498	0.139136	0.0732268							0.273671	0.0824468	0.154304	0.0969064							0.202005	0.0134546	0.0564506
0.101583	0.271697	0.257687	0.237256	0.0422972								0.0218034	0.105008	0.159375	0.175066							0.0525377	0.0698864	0.229432	0.0944014							0.0643715	0.0981698	0.0850707	0.232794							0.133173	0.072381	0.090704
0.215321	0.0159064	0.0436741	0.156251	0.286494								0.0889126	0.182915	0.105603	0.13132							0.0822637	0.284443	0.135399	0.214565							0.0904522	0.255629	0.131113	0.240183							0.121647	0.124052	0.0630633
0.209987	0.0352616	0.245779	0.142886	0.178723								0.116592	0.10315	0.171447	0.0544184							0.0973075	0.0906996	0.15015	0.235712							0.184506	0.101462	0.0731321	0.0785843							0.0276526	0.0791357	0.077188
0.0817686	0.114423	0.140452	0.25915	0.720004								0.0894482	0.116017	0.207913	0.17985							0.126294	0.052082	0.0622417	0.220643							0.147926	0.308378	0.177908	0.118021							0.070228	0.127976	0.16369
0.187385	0.151185	0.152116	0.117165	0.3102								0.213342	0.445468	0.237002	0.117242							0.13332	0.160106	0.167949	0.0632137							0.0772256	0.358951	0.00664284	0.228475							0.100075	0.0762064	0.115882
0.186405	0.123989	0.214119	0.210371	0.239644								0.137123	0.0348123	0.346864	0.0792251							0.0938831	0.0861887	0.179115	0.0588558							0.011108	0.0532279	0.177446	0.0595442							0.0519592	0.109122	0.199141
0.238764	0.252035	1.03973	0.283436	0.129								0.139959	0.0686378	0.290232	0.405675							0.036227	0.191271	0.0122809	0.561878							0.0545573	0.0320394	0.20416	0.0735469							0.201477	0.0337522	0.0578657
0.215765	0.0727819	0.187964	0.172244	0.118854								0.213869	0.0671353	0.214805	0.189096							0.12323	0.0115935	0.0774265	0.123117							0.112958	0.01713	0.240727	0.0631687							0.169663	0.0666893	0.273092
0.100039	0.1488	0.24238	0.256099	0.169882								0.117392	0.114368	0.0556205	0.262745							0.0594293	0.124385	0.0422373	0.0433098							0.155354	0.104345	0.224839	0.123612							0.149893	0.0845693	0.181827
0.0833515	0.244001	0.206725	0.098666	0.174612								0.13596	0.28746	0.210852	0.195795							0.0842355	0.189502	0.150657	0.15239							0.179992	0.0828211	0.165965	0.121918							0.0942613	0.12299	0.0952277
0.165336	0.141106	0.115057	0.0461248	0.31425								0.105977	0.0901625	0.349203	0.0924302							0.058705	0.190303	0.136245	0.0861483							0.146388	0.160204	0.202618	0.100819							0.0741173	0.271579	0.113456
0.129605	0.248338	0.0993613	0.280995	0.267537								0.280878	0.0661198	0.264891	0.120353							0.207435	0.147582	0.120421	0.0674408							0.101278	0.179056	0.336718	0.071028							0.0483023	0.03298	0.0444905
0.121914	0.0536299	0.216849	0.0696261	0.202225								0.109355	0.225134	0.123108	0.135836							0.0782813	0.145698	0.147355	0.150431							0.0193242	0.104754	0.0732504	0.881538							0.144792	0.0466364	0.0105507
0.00543818	0.121926	0.127863	0.22802	0.176201								0.216788	0.147379	0.230791	0.200464							0.0781136	0.169822	0.081382	0.213423							0.0913836	0.076806	0.02378	0.0791549							0.155108	0.114931	0.00224072
0.0382826	0.176999	0.122158	0.256112	0.0842236								0.2925	0.0605129	0.366466	0.0223347							0.165216	0.113369	0.05894	0.179029							0.142476	0.0695556	0.0304604	0.0723877							0.0231781	0.0381369	0.0919661
0.096992	0.0473779	0.1708	0.0323753	0.145274								0.0798603	0.17832	0.300652	0.1109							0.145698	0.185604	0.0887715	0.0631963							0.187167	0.0847976	0.0139522	0.101707							0.0753225	0.0363981	0.165943
0.247532	0.308747	0.280043	0.259334	0.300658								0.159587	0.216556	0.00591342	0.146456							0.202056	0.15666	0.0515525	0.194493							0.289893	0.0337428	0.0812525	0.166028							0.0462462	0.031892	0.61691
0.367577	0.075388	0.15837	0.177637	0.0909225								0.127431	0.0460362	0.0488808	0.183502							0.047623	0.131384	0.144687	0.0928002							0.176054	0.0880369	0.132618	0.0565655							0.0668536	0.0440627	0.129597
0.135	0.100598	0.00458621	0.343624	0.715581								0.166897	0.0674877	0.127965	0.0678521							0.270138	0.0927624	0.431686	0.193771							0.0706931	0.225376	0.153692	0.00308862							0.0487417	0.18459	0.0594292
0.0438674	0.136106	0.019334	0.157826	0.0732998								0.109655	0.134226	0.226171	0.0842381							0.0508535	0.0722362	0.0704268	0.295727							0.0661021	0.0782741	0.156641	0.0598235							0.0610384	0.0143433	0.142348
0.20806	0.166277	0.176988	0.00671534	0.0935116								0.0242048	1.04544	0.182193	0.240125							0.340368	0.24929	0.0346585	0.23284							0.0984707	0.0840171	0.121024	0.229933							0.0867718	0.0623747	0.158933
0.129491	0.300905	0.256397	0.168618	0.311424								0.0412275	0.178447	0.320606	0.523601							0.174363	0.0549837	0.0715556	0.216195							0.173279	0.112116	0.190732	0.0810601							0.161881	0.206227	0.0750643
0.206503	0.278535	0.130836	0.0922252	0.309965								0.233176	0.235423	0.171684	0.146979							0.158412	0.0624793	0.127847	0.0647915							0.236704	0.125788	0.126236	0.0734568							0.00478239	0.07157	0.0687515
0.168379	0.253311	0.0517148	0.270457	0.225445								0.19126	0.301356	0.322558	0.101374							0.0909696	0.0779259	0.0460792	0.0558259							0.0509153	0.090136	0.157337	0.149601							0.157855	0.166459	0.0547535
0.155568	0.170358	0.215965	0.202485	0.0883802								0.168546	0.109718	0.255462	0.0397304							0.671059	0.0462365	0.0738109	0.255538							0.115343	0.129646	0.073538	0.239595							0.126077	0.237767	0.0767418
0.221178	0.0888659	0.160717	0.154862	0.212893								0.184029	0.21637	0.36886	0.239266							0.00696277	0.143894	0.0250807	0.0499938							0.0580903	0.0936885	0.192534	0.149915							0.728359	0.179977	0.0969388
0.0123457	0.191895	0.933717	0.0333883	0.135594								0.144714	0.112778	0.176302	0.0707209							0.101594	0.0560494	0.160698	0.150348							0.0659452	0.0253719	0.173011	0.0542493							0.150361	0.090839	0.172108
0.139088	0.0998687	0.15005	0.180858	0.174508								0.0836854	0.195898	0.307927	0.255222							0.142465	0.0928473	0.187255	0.0641229							0.0792933	0.112358	0.115288	0.0717884							0.0262625	0.185217	0.173655
0.0522056	0.231047	0.412697	0.0306559	0.0384666								0.0673661	0.066403	0.15405	0.264415							0.163627	0.119457	0.0977987	0.0614837							0.0896839	0.0833264	0.0408853	0.149475							0.0996906	0.0774618	0.0915114
0.0901398	0.157672	0.182186	0.0311077	0.263622								0.184142	0.13932	0.108319	0.256244							0.209969	0.280859	0.292733	0.0559496							0.024691	0.177937	0.00762418	0.181384							0.0650019	0.067735	0.186508
0.276603	0.129303	0.170899	0.194818	0.189239								0.116045	0.189026	0.148316	0.251659							0.0941264	0.0994417	0.205428	0.0556179							0.122666	0.0190505	0.072146	0.178269							0.0638092	0.128892	0.146564
0.0476853	0.148711	0.159117	0.00609619	0.0332633								0.149967	0.159016	0.139162	0.130868							0.122513	0.0183698	0.281831	0.0442784							0.098279	0.0477696	0.317218	0.206078							0.198313	0.0950847	0.0821998
0.114419	0.257679	0.236419	0.152121	0.0691729								0.0551963	0.173584	0.159511	0.248106							0.0956439	0.228911	0.164633	0.039323							0.029531	0.179336	0.243838	0.112069							0.0592003	0.137078	0.278203
0.070883	0.259067	0.292353	0.142276	0.277939								0.0892574	0.303696	0.15321	0.141746							0.124601	0.167005	0.148625	0.0583445							0.0721533	0.425928	0.180424	0.148262							0.155247	0.215971	0.120299
0.0331074	0.0743518	0.247003	0.100691	0.259186								0.22186	0.203429	0.186141	0.128							0.225301	0.274321	0.288259	0.0909464							0.0170438	0.093182	0.136234	0.0598165							0.0886487	0.115982	0.22837
0.171651	0.0857369	0.0463646	0.173061	0.21104								0.168292	0.119559	0.29119	0.216971							0.0744867	0.188149	0.258947	0.047565							0.0959251	0.0392948	0.232468	0.147738							0.0728523	0.0394957	0.00988488
0.0575377	0.135944	0.183583	0.00848196	0.153833								0.0108893	0.265235	0.00338749	0.327799							0.0128815	0.0970661	0.167844	0.0733242							0.0428245	0.0382725	0.339413	0.077607							0.0840441	0.0928477	0.0540515
0.12037	0.0659767	0.225364	0.200499	0.13047								0.138457	0.0837992	0.1653	0.21226							0.083861	0.149116	0.263733	0.0966765							0.0603481	0.164434	0.300363	0.329055							0.192734	0.111839	0.0277596
0.116912	0.226516	0.192471	0.194378	0.128659								0.0385803	0.0455515	0.121383	0.0709888							0.0639535	0.0300733	0.171224	0.0910108							0.0800124	0.0570921	0.25421	0.241652							0.0414297	0.103996	0.151261
0.0478506	0.111386	0.0453822	0.128226	0.0877371								0.20974	0.0437659	0.0778829	0.0962559							0.222635	0.106213	0.568214	0.218895							0.107176	0.0202447	0.088245	0.00943058							0.0892981	0.0522766	0.0488464
0.152083	0.241348	0.0745369	0.0829358	0.307923								0.331422	0.0765541	0.23982	0.199256							0.160031	0.161291	0.156165	0.0811217							0.142651	0.10783	0.0797543	0.0737166							0.0278232	0.0657614	0.096565
0.119571	0.143376	0.307949	0.0740233	0.0795403								0.179606	0.0398908	0.334087	0.215392							0.14056	0.255522	0.262707	0.106945							0.0765289	0.039081	0.0338365	0.0639143							0.123374	0.191493	0.0749477
0.0569825	0.112244	0.259047	0.13497	0.232916								0.105576	0.0237295	0.121175	0.200563							0.056614	0.0584245	0.175662	0.18052							0.0355431	0.0628789	0.0546065	0.0419936							0.1433	0.21693	0.0609977
0.0469259	0.238287	0.508051	0.191342	0.0685678								0.16851	0.0607643	0.114261	0.180188							0.085572	0.0396648	0.0720023	0.0651475							0.0469007	0.0717252	0.0675059	0.662741							0.217643	0.256398	0.0743386
0.158723	0.330257	0.152458	0.365241	0.465456								0.0369515	0.0670522	0.201684	0.239213							0.143846	0.0672058	0.0735999	0.185872							0.101263	0.0106025	0.154687	0.154576							0.131581	0.180225	0.0149287
0.0719354	0.262283	0.11254	0.0601594	0.233964								0.116895	0.12443	0.21071	0.098791							0.0522659	0.253757	0.037004	0.344973							0.160407	0.404433	0.133668	0.195487							0.104407	0.0968577	0.167621
0.118394	0.129053	0.100106	0.0333138	0.112372								0.200873	0.384902	0.268161	0.263333							1.05969	0.278849	0.0320379	0.107479							0.0337574	0.0756616	0.255975	0.268255							0.245797	0.0625283	0.0666108
0.205191	0.170543	0.159414	0.0336984	0.215651								0.24325	0.185948	0.253987	0.204064							0.157751	0.386345	0.202827	0.141428							0.0123061	0.108196	0.0583785	0.0896215							0.0633861	0.0927477	0.138978
0.0585694	0.0748847	0.0654816	0.164957	0.268647								0.0613803	0.0893102	0.0367636	0.0863779							0.0150662	0.165681	0.0555723	0.203958							0.0166201	0.0889632	0.165104	0.0537234							0.0834403	0.217511	0.1428
0.143926	0.560391	0.085665	0.0496019	0.156903								0.033354	0.109134	0.0890539	0.349212							0.12179	0.138818	0.0981451	0.168858							0.0462204	0.0784483	0.120138	0.218192							0.01453	0.269892	0.0567853
0.132192	0.076716	0.133561	0.916976	0.207918								0.0664692	0.0988937	0.133212	0.268558							0.0969004	0.0664163	0.231112	0.150014							0.088627	0.0321559	0.186971	0.251623							0.269861	0.113364	0.0613933
0.0522326	0.0150856	0.136747	0.106494	0.212224								0.281754	0.045925	0.212056	0.171854							0.124347	0.122058	0.169523	0.237735							0.0423092	0.0484113	0.131359	0.182087							0.144046	0.223876	0.0867873
0.172605	0.185998	0.136308	0.143313	0.0446364								0.165029	0.22344	0.151239	0.320368							0.117356	0.030796	0.00760749	0.230569							0.0079804	0.183976	0.114912	0.0458083							0.231403	0.0127961	0.0364528
0.180679	0.262447	0.146796	0.0275861	0.173227								0.0315364	0.238701	0.0919057	0.335931							0.123034	0.0448817	0.261036	0.189921							0.0983106	0.0574877	0.363424	0.0621804							0.621641	0.037052	0.159258
0.273879	0.207931	0.0324928	0.147844	0.256815								0.262342	0.0825823	0.142338	0.031566							0.0359528	0.190308	0.0888252	0.0486391							0.23119	0.0529615	0.0546546	0.0573748							0.28542	0.0487318	0.0467144
0.144946	0.174845	0.107748	0.315655	0.240023								0.287164	0.33368	0.274084	0.105949							0.277731	0.131831	0.0448976	0.107294							0.140785	0.0565721	0.216502	0.287269							0.102956	0.129684	0.0155113
0.0356192	0.234359	0.101294	0.125158	0.112568								0.142311	0.159676	0.0928743	0.146558							0.0548529	0.0826444	0.0101749	0.15525							0.149225	0.0381548	0.222254	0.273806							0.16194	0.0539912	0.0684809
0.0515249	0.0186503	0.125876	0.1268	0.286226								0.16639	0.187965	0.22323	0.338992							0.321767	0.10282	0.125365	0.123331							0.13092	0.0723905	0.0463531	0.0582379							0.120656	0.0676766	0.0957199
0.10844	0.149054	0.132296	0.0401139	0.141358								0.28594	0.0649904	0.234067	0.12502							0.783135	0.0568334	0.138217	0.23263							0.196185	0.0933271	0.0205159	0.0713516							0.13392	0.22229	0.304576
0.227117	0.133951	0.0765528	0.165676	0.369087								0.0526083	0.575712	0.101087	0.243309							0.135986	0.041558	0.059031	0.101334							0.253611	0.0792968	0.0998591	0.245733							0.227608	0.147103	0.132538
0.196771	0.212175	0.191056	0.107292	0.266366								0.0939024	0.0803678	0.195496	0.0730829							0.0483902	0.0593011	0.0503525	0.184324							0.387711	0.0818126	0.164584	0.12504							0.104434	0.241559	0.102872
0.0917772	0.048498	0.287909	0.165735	0.271238								0.236417	0.0615187	0.141302	0.112083							0.111506	0.0930242	0.648545	0.158817							0.0153508	0.0243514	0.063099	0.060075							0.241692	0.127151	0.250642
0.217302	0.0573842	0.25053	0.0360916	0.126638								0.184196	0.0903989	0.0923837	0.103189							0.316533	0.223404	0.226165	0.0737553							0.234732	0.010539	0.0825118	0.170735							0.117564	0.0265744	0.235026
0.0675099	0.171492	0.192487	0.189754	0.2386								0.112547	0.150935	0.100047	0.267403							0.0901688	0.118482	0.327299	0.149162							0.018276	0.173	0.0404985	0.143081							0.23627	0.0695337	0.107491
0.0919832	0.0686684	0.146395	0.0409467	0.176963								0.180147	0.0710292	0.122163	0.201524							0.0740477	0.10426	0.240801	0.106358							0.313936	0.380174	0.107297	0.0460099							0.0693546	0.0530822	0.0627924
0.0236928	0.00676776	0.0735631	0.0999595	0.248429								0.35486	0.279497	0.194943	0.138742							0.102866	0.0652105	0.181756	0.127815							0.0633725	0.210807	0.153415	0.181553							0.0863344	0.131893	0.165885
0.104377	0.187014	0.422386	0.059165	0.198241								0.243479	0.200235	0.591045	0.0532149							0.085304	0.129251	0.149599	0.0750613							0.0723392	0.0481606	0.0952499	0.0865865							0.139734	0.0384552	0.0364093
0.138985	0.124075	0.105252	0.0871193	0.215412								0.303966	0.0656822	0.262616	0.301999							0.173294	0.233522	0.296041	0.0358137							0.237073	0.0544007	0.0100087	0.101317							0.161826	0.0936913	0.0217628
0.0771521	0.211963	0.124782	0.310187	0.177279								0.171217	0.0720056	0.0769452	0.162626							0.302167	0.247548	0.216149	0.241374							0.0469335	0.112898	0.0920431	0.140333							0.0452814	0.101976	0.0379253
0.160245	0.223164	0.108322	0.0764797	0.190385								0.0479454	0.0533884	0.0354562	0.096131							0.0887835	0.112409	0.129801	0.0472721							0.17547	0.154905	0.206528	0.155674							0.0906295	0.0341228	0.0127771
0.252121	0.025587	0.221242	0.335019	0.082347								0.173899	0.139517	0.662188	0.188193							0.113861	0.126774	0.202539	0.0267979							0.0264562	0.0921055	0.144446	0.195121							0.130783	0.150871	0.0763008
0.134897	0.307121	0.129129	0.0504698	0.267989								0.202083	0.0254774	0.198247	0.0991019							0.130853	0.0616338	0.120074	0.0341791							0.135934	0.284231	0.114876	0.108698							0.183493	0.118025	0.0707532
0.320796	0.188396	0.0535886	0.0330988	0.187579								0.0962331	0.0438742	0.14817	0.146389							0.182922	0.168623	0.108522	0.214102							0.252165	0.147209	0.107297	0.301049							0.0391502	0.17583	0.206595
0.327471	0.111914	0.0930359	0.101365	0.100242								0.139532	0.0873831	0.0608894	0.133056							0.0277782	0.231807	0.864097	0.25185							0.23678	0.296934	0.0926154	0.094018							0.0278324	0.0877183	0.213435
0.0361311	0.109549	0.0260877	0.336018	0.107655								0.183303	0.0398009	0.0837765	0.291741							0.0807162	0.030509	0.0610603	0.174335							0.262095	0.0843573	0.279298	0.127641							0.121208	0.0628607	0.118422
0.0254602	0.0925773	0.164374	0.278817	0.16811								0.171477	0.0583297	0.285441	0.0980674							0.122482	0.164259	0.263042	0.204002							0.115668	0.0350605	0.0646169	0.149601							0.0729759	0.180239	0.0128466
0.0383633	0.241361	0.20652	0.0319703	0.2412								0.247856	0.0817584	0.164089	0.188402							0.306789	0.247639	0.122132	0.055301							0.380292	0.0857853	0.0251219	0.102122							0.213956	0.0827011	0.0720539
0.161684	0.106301	0.168144	0.0959017	0.160681								0.168936	0.111578	0.129433	0.136756							0.2641	0.215296	0.157954	0.150897							0.275106	0.0241186	0.167574	0.259161							0.0243954	0.0609626	0.112006
0.0759348	0.0947427	0.129814	0.0318913	0.282052								0.0655524	0.154865	0.122986	0.205522							0.167796	0.184914	0.144159	0.0443123							0.228697	0.0870896	0.174339	0.0686355							0.079482	0.274238	0.049844
0.213282	0.0762468	0.252683	0.102473	0.174439								0.146797	0.0887561	0.0856105	0.546582							0.323392	0.0493285	0.188091	0.164165							0.058311	0.157178	0.156883	0.157857							0.227936	0.168761	0.111166
0.112008	0.164198	0.105306	0.114893	0.201382								0.275975	0.0184488	0.109926	0.179278							0.11184	0.118802	0.226893	0.294257							0.0471023	0.0276791	0.198683	0.168718							0.157246	0.0275153	0.113905
0.18315	0.111416	0.0718497	0.0609158	0.234905								0.224177	0.0541123	0.279737	0.169864							0.283765	0.0873559	0.0946538	0.169229							0.0382469	0.0578123	0.0711791	0.306623							0.210721	0.100741	0.0984698
0.0908306	0.189331	0.017226	0.0643084	0.0940776								0.247649	0.139477	0.181281	0.0382532							0.382941	0.214822	0.325893	0.303202							0.239843	0.0547972	0.0835272	0.967369							0.0240005	0.0707944	0.026258
0.0403527	0.187922	0.0122041	0.254386	0.319704								0.0622067	0.121515	0.249361	0.0925663							0.27605	0.298871	0.154316	0.138337							0.336383	0.216258	0.0906397	0.352214							0.0371466	0.039975	0.114857
0.0812673	0.26496	0.271469	0.277977	0.155205								0.094341	0.190665	0.164932	0.0893035							0.143986	0.139979	0.256401	0.11125							0.120358	0.165209	0.0968767	0.122358							0.0784349	0.0715266	0.122566
0.145767	0.0598348	0.15663	0.128573	0.270038								0.21753	0.226434	0.00794604	0.0949282							0.192472	0.131932	0.106744	0.1339							0.128625	0.108847	0.133735	0.725775							0.0480918	0.123409	0.042706
0.144327	0.11488	0.158323	0.169047	0.0224888								0.30203	0.0839468	0.164104	0.359305							0.0858223	0.198298	0.301145	0.184958							0.353762	0.386961	0.142175	0.0918453							0.252663	0.197178	0.0354068
0.168576	0.176261	0.110882	0.304711	0.20682								0.0989289	0.00442514	0.211377	0.193816							0.0554041	0.100953	0.0892857	0.171057							0.0813833	0.0980453	0.214509	0.252418							0.135379	0.198406	0.141389
0.178817	0.204842	0.070785	0.129561	0.14037								0.172885	0.0937092	0.0845521	0.175763							0.0580756	0.150717	0.211093	0.220683							0.121215	0.194736	0.178136	0.107473							0.302901	0.179784	0.0774077
0.0315328	0.0941439	0.255789	0.102221	0.057095								0.169474	0.0540787	0.107617	0.223371							0.0770485	0.102022	0.0264819	0.143469							0.268138	0.211681	0.247931	0.037472							0.0610406	0.272318	0.100174
0.368637	0.216905	0.0817556	0.0334261	0.29409								0.0222803	0.0238375	0.0813536	0.22902							0.0663905	0.103701	0.073049	0.192128							0.0353875	0.320681	0.0735345	0.099376							0.0586557	0.0980707	0.157458
0.211904	0.0679369	0.0733303	0.214007	0.173992								0.152893	0.0579822	0.218673	0.137907							0.143203	0.0822152	0.0797639	0.458686							0.129169	0.0999558	0.295229	0.145284							0.18591	0.114281	0.0956384
0.194153	0.158194	0.201775	0.0486778	0.116775								0.0442121	0.103949	0.281547	0.0488319							0.022651	0.178846	0.201977	0.0909804							0.0551962	0.233096	0.135032	0.0603781							0.0615663	0.0738127	0.101305
0.209428	0.0572368	0.0324289	0.264875	0.0890086								0.0707575	0.0570654	0.306261	0.188716							0.123705	0.239396	0.0997306	0.273024							0.100966	0.0841878	0.112458	0.0596515							0.0700737	0.0478761	0.0644677
0.214762	0.0872598	0.0937463	0.194511	0.180955								0.116701	0.114268	0.105944	0.114107							0.114862	0.140693	0.234126	0.180548							0.00249981	0.136286	0.149438	0.116558							0.0542322	0.0508846	0.145016
0.201079	0.0401888	0.436938	0.261316	0.231476								0.0464395	0.0777598	0.0454525	0.126441							0.0277423	0.325315	0.147152	0.214083							0.235691	0.359348	0.0782695	0.0559069							0.150342	0.190266	0.123938
0.126687	0.14695	0.168533	0.0629137	0.114528								0.0703488	0.0772975	0.0911069	0.110743							0.292044	0.222444	0.193811	0.0737912							0.236337	0.111446	0.141271	0.203792							0.123717	0.306784	0.968538
0.0339701	0.0716195	0.200361	0.220116	0.19926								0.114974	0.0758059	0.153929	0.0308637							0.0798717	0.215851	0.307801	0.0852788							0.0754838	0.062588	0.0404394	0.201447							0.0814892	0.0996105	0.0420475
0.194604	0.0824336	0.0323782	0.0306951	0.324273								0.183944	0.0208676	0.120972	0.162723							0.311428	0.205106	0.244679	0.247155							0.207209	0.0691711	0.0249194	0.246637							0.0985075	0.0779477	0.143681
0.370508	0.073377	0.117502	0.0606373	0.123243								0.0691148	0.0772785	0.0346585	0.07329							0.188584	0.159509	0.050726	0.275012							0.145152	0.0731748	0.00541626	0.203769							0.165891	0.0737921	0.174344
0.120033	0.220997	0.287143	0.058279	0.0772719								0.208082	0.0595954	0.136788	0.723764							0.0383027	0.232325	0.134913	0.144065							0.0860202	0.127447	0.0701749	0.654294							0.219551	0.272309	0.0242779
0.202327	0.187937	0.0840823	0.329854	0.215526								0.0694741	0.0891854	0.115357	0.140057							0.298836	0.129441	0.125729	0.20146							0.0809755	0.221354	0.0364259	0.117807							0.301594	0.0857343	0.0797248
0.100097	0.0696909	0.178806	0.0822801	0.240356								0.271172	0.107972	0.123723	0.333021							0.19854	0.231001	0.190104	0.0670936							0.257992	0.0694677	0.0219614	0.221701							0.0146299	0.116509	0.15934
0.225583	0.031793	0.26467	0.154901	0.263177								0.204594	0.0854366	0.151986	0.980422							0.0726529	0.173266	0.395758	0.100938							0.165829	0.338713	0.0542755	0.203395							0.0992354	0.0801771	0.130826
0.152363	0.191248	0.353089	0.328198	0.272952								0.106334	0.016414	0.0530907	0.197497							0.501154	0.239225	0.0951818	0.0952744							0.139575	0.0558377	0.085406	0.0262918							0.0375798	0.0878465	0.210498
0.165947	0.120625	0.224571	0.0926665	0.0595037								0.0657692	0.124792	0.18889	0.101515							0.171719	0.196113	0.0480558	0.0222366							0.0421605	0.124375	0.0773377	0.0863391							0.186012	0.0154879	0.109616
0.0728085	0.177203	0.149018	0.148957	0.157997								0.0718204	0.0386565	0.219133	0.0807565							0.14297	0.134314	0.0781027	0.277819							0.148563	0.047051	0.141893	0.1116							0.248537	0.1635	0.230613
0.0490088	0.059179	0.0786597	0.250458	0.993018								0.151414	0.128183	0.176628	0.202942							0.0726754	0.106159	0.0354845	0.0474882							0.0468852	0.110134	0.0659294	0.135638							0.208641	0.12175	0.31704
0.0594018	0.14454	0.194115	0.166371	0.0619878								0.178594	0.165995	0.107961	0.283582							0.235053	0.248581	0.148753	0.103693							0.318086	0.0288702	0.103133	0.72181							0.134991	0.54685	0.10842
0.201711	0.145936	0.182519	0.179699	0.029366								0.171322	0.0759512	0.119374	0.126842							0.161794	0.13086	0.0490118	0.120493							0.0623961	0.173218	0.0851614	0.112289							0.136245	0.130682	0.158884
0.208802	0.129178	0.0799347	0.102888	0.0855226								0.241184	0.122849	0.0954057	0.033856							0.309727	0.0503078	0.138617	0.0666824							0.0677693	0.200718	0.0383806	0.0426471							0.0895027	0.0627806	0.368141
0.0975487	0.163188	0.209961	0.272314	0.0799077								0.104202	0.0568781	0.0930368	0.00246081							0.0604687	0.144057	0.216203	0.0347115							0.202073	0.0404536	0.04096	0.14426							0.153075	0.196353	0.279077
0.23492	0.128537	0.0169746	0.300583	0.158949								0.183631	0.0830903	0.193069	0.102933							0.279313	0.166766	0.260888	0.186245							0.0495489	0.0927667	0.0729675	0.168301							0.0348333	0.23775	0.0408406
0.137918	0.161342	0.229392	0.295528	0.207947								0.131852	0.0767708	0.0826404	0.153514							0.081724	0.0953254	0.0873439	0.183933							0.125593	0.145445	0.0393837	0.31901							0.0263096	0.173345	0.158863
0.115008	0.062307	0.0523895	0.135966	0.15334								0.196591	0.0222771	0.0223226	0.120506							0.0597315	0.0221271	0.120965	0.0672191							0.146223	0.178207	0.0492919	0.217896							0.123668	0.0729546	0.125822
0.142559	0.166701	0.102481	0.191538	0.0878315								0.368757	0.0753375	0.138745	0.10523							0.279331	0.324878	0.0625347	0.148563							0.42876	0.0648068	0.0508722	0.107655							0.142927	0.0744275	0.128514
0.0865747	0.0651704	0.150805	0.249583	0.0572155								0.156014	0.0695634	0.144974	0.0352729							0.105418	0.245724	0.140767	0.452875							0.301216	0.0744136	0.0494366	0.850357							0.0919174	0.163671	0.0552532
0.222754	0.192538	0.247735	0.180025	0.0734498								0.194428	0.122633	0.0958715	0.0194865							0.0664967	0.160436	0.2141	0.255416							0.191111	0.262103	0.0156669	0.109512							0.0354596	0.120275	0.0577783
0.0816407	0.327588	0.152782	0.14951	0.254221								0.0168452	0.0329499	0.225608	0.139141							0.198692	0.26729	0.116462	0.158851							0.153867	0.277176	0.0849443	0.27396							0.0557165	0.19137	0.0913742
0.143315	0.0691727	0.136152	0.0461518	0.0825204								0.108992	0.0996081	0.171085	0.196484							0.0987062	0.267269	0.210913	0.0786197							0.203117	0.194063	0.115215	0.107073							0.0888039	0.0472261	0.111642
0.0163264	0.270149	0.232237	0.277863	0.25429								0.087079	0.0215151	0.0805366	0.24821							0.0791334	0.245354	0.202859	0.11408							0.21452	0.0552332	0.0251304	0.287725							0.115546	0.0465878	0.0808473
0.11985	0.300645	0.15435	0.212009	0.183392								0.118772	0.178136	0.137686	0.180004							0.144934	0.208977	0.227724	0.0751602							0.239049	0.195048	0.0181004	0.229456							0.0298785	0.0311941	0.088581
0.122326	0.204956	0.235079	0.147738	0.193091								0.53319	0.172829	0.226401	0.215622							0.323089	0.0943872	0.0729179	0.0500791							0.200279	0.134282	0.128246	0.20853							0.0614638	0.0616083	0.0323897
0.123276	0.20447	0.327768	0.193207	0.0106181								0.133942	0.0807762	0.123286	0.230635							0.229819	0.115309	0.024462	0.159996							0.140885	0.038666	0.0843948	0.103414							0.0169673	0.0872624	0.237029
0.114965	0.258075	0.188517	0.239366	0.249088								0.204495	0.0478345	0.147184	0.0584189							0.312364	0.286648	0.144817	0.299399							0.0530669	0.107919	0.120429	0.283062							0.167614	0.0750629	0.0805381
0.210901	0.257551	0.124769	0.287739	0.0307998								0.281238	0.0570929	0.186889	0.11574							0.0250475	0.246101	0.0416105	0.120651							0.0892849	0.0797181	0.0988962	0.166726							0.127537	0.183778	0.0593159
0.0821199	0.111976	0.102071	0.147461	0.0847987								0.142829	0.0183363	0.0784232	0.0554997							0.169869	0.369369	0.18632	0.127351							0.072211	0.166218	0.0933649	0.0810799							0.183677	0.0922281	0.11135
0.0539421	0.220025	0.181816	0.215509	0.118513								0.179184	0.0329478	0.115898	0.291947							0.100104	0.199275	0.10971	0.732381							0.0455443	0.132389	0.087766	0.121313							0.168148	0.0948781	0.135522
0.226983	0.203029	0.116389	0.326974	0.0713								0.198167	0.0253129	0.116823	0.235314							0.342258	0.078391	0.0644792	0.0702625							0.182001	0.177882	0.0323945	0.0838234							0.0860278	0.216162	0.0830686
0.183457	0.178634	0.167879	0.190164	0.0696357								0.336357	0.0605517	0.133446	1.04036							0.216329	0.142383	0.0257045	0.195371							0.0675093	0.0622537	0.0380266	0.0889775							0.107497	0.1217	0.075959
0.065719	0.078905	0.0926674	0.293842	0.115219								0.042615	0.0885177	0.211241	0.184137							0.248391	0.0770375	0.0676668	0.230584							0.1766	0.129543	0.0680689	0.058612							0.145166	0.247805	0.0621528
0.0322529	0.157716	0.192963	0.119087	0.195099								0.205276	0.138209	0.0468135	0.228558							0.143544	0.140241	0.0396273	0.0490954							0.243187	0.113845	0.0929628	0.165318							0.0513501	0.151584	0.258125
0.256388	0.0777436	0.687176	0.12112	0.249324								0.292076	0.117417	0.254357	0.13579							0.160572	0.513496	0.0320069	0.0474833							0.0958439	0.287517	0.0776455	0.0616761							0.23646	0.155616	0.107876
0.0122833	0.211304	0.0691284	0.180149	0.0566671								0.053647	0.0106246	0.14821	0.250545							0.137669	0.121747	0.0618417	0.0931825							0.35997	0.151682	0.076001	0.100839							0.188158	0.117347	0.209283
0.273931	0.0520419	0.0930446	0.106113	0.104449								0.197325	0.0247787	0.0495148	0.219321							0.344309	0.141488	0.0767345	0.117993							0.107081	0.16953	0.074034	0.0614883							0.0358848	0.0664436	0.115715
0.272737	0.466867	0.173945	0.184798	0.0212674								0.0448039	0.068708	0.219458	0.201478							0.113661	0.0331955	0.0603309	0.0723593							0.0964351	0.0712817	0.0748947	0.0899278							0.143354	0.0329724	0.0497073
0.151059	0.194776	0.0384362	0.0440533	0.151388								0.308424	0.049784	0.166318	0.115208							0.316324	0.062924	0.0208755	0.0359868							0.0574211	0.154373	0.159308	0.458629							0.10585	0.0567848	0.118489
0.0265736	0.224919	0.0539415	0.0929689	0.203706								0.174086	0.0735095	0.160741	0.150294							0.267233	0.0948501	0.114413	0.0501514							0.0748828	0.342224	0.0264009	0.163989							0.0564665	0.05418	0.0545935
0.0736626	0.200568	0.145199	0.315731	0.104364								0.0296029	0.0547516	0.176274	0.195682							0.148589	0.444626	0.0471277	0.213948							0.0553152	0.177934	0.137937	0.0161708							0.050323	0.170171	0.119659
0.0806249	0.158316	0.0772887	0.481231	0.204024								0.161952	0.0368735	0.147159	0.181568							0.186711	0.130987	0.0894877	0.0689481							0.109575	0.18264	0.060669	0.0377755							0.0712816	0.0432229	0.0814451
0.0284854	0.0760536	0.0970847	0.0847427	0.198171								0.177218	0.23377	0.274779	0.311337							0.11946	0.164867	0.121325	0.0482733							0.0479162	0.0315645	0.216996	0.0740666							0.112627	0.0808879	0.0612329
0.227964	0.0943766	0.296934	0.101585	0.176351								0.212602	0.236824	0.117013	0.0646899							0.104241	0.0723838	0.253248	0.0238833							0.261784	0.115574	0.126067	0.148852							0.160733	1.05562	0.0750417
0.110349	0.115348	0.122331	0.292031	0.140305								0.131383	0.107436	0.224317	0.197373							0.22305	0.0531369	0.0586776	0.0856035							0.0142488	0.0138049	0.213221	0.0805669							0.190002	0.175741	0.052663
0.068523	0.352091	0.122185	0.0946644	0.141291								0.179899	0.206178	0.135696	0.184049							0.100071	0.156971	0.0541375	0.0362327							0.297182	0.234388	0.370323	0.0207854							0.109442	0.0808743	0.298337
0.157459	0.136265	0.131859	0.544631	0.209033								0.132539	0.181199	0.148265	0.134506							0.085073	0.23584	0.262853	0.0584006							0.272728	0.181626	0.0762649	0.0646493							0.0559189	0.0771404	0.114704
0.149312	0.0795458	0.147792	0.0518667	0.200839								0.0951915	0.304373	0.0419748	0.0806984							0.115968	0.0967362	0.287049	0.0744203							0.180506	0.0748391	0.0500624	0.0518541							0.0743976	0.0836571	0.157671
0.195332	0.121764	0.100735	0.511845	0.214892								0.132298	0.264255	0.283173	0.453317							0.101259	0.0228193	0.0862783	0.0946864							0.142168	0.25838	0.106597	0.148946							0.0455047	0.080323	0.292627
0.183761	0.0882178	0.134583	0.196085	0.320955								0.199544	0.232865	0.140992	0.261039							0.11325	0.146101	0.0586269	0.0569137							0.190626	0.0264713	0.181506	0.066796							0.234192	0.160501	0.24812
0.0352399	0.134857	0.301006	0.163766	0.139494								0.0353778	0.196651	0.126735	0.331872							0.158222	0.263517	0.0492489	0.243001							0.121826	0.0803605	0.111557	0.0115854							0.18208	0.106538	0.2237
0.170785	0.148391	0.179443	0.174829	0.189674								0.27389	0.170185	0.24691	0.0707853							0.270143	0.696439	0.172463	0.00873531							0.0897872	0.130205	0.104146	0.0764877							0.137038	0.189313	0.200807
0.161055	0.206981	0.22795	0.105355	0.0799453								0.344383	0.0920882	0.12239	0.227666							0.180169	0.109329	0.156152	0.184164							0.0664876	0.179767	0.231056	0.197082							0.206676	0.0520144	0.0610953
0.0852957	0.208835	0.183147	0.292323	0.0744406								0.0782233	0.0906015	0.157487	0.262661							0.766097	0.262069	0.129409	0.105185							0.162114	0.344819	0.0275687	0.0484467							0.141843	0.0674503	0.0220383
0.16988	0.0631043	0.299331	0.0604855	0.116398								0.0674336	0.175798	0.173358	0.151763							0.188907	0.190266	0.254263	0.344872							0.113826	0.172126	0.162679	0.0716337							0.0174177	0.286218	0.0448645
0.119756	0.0434214	0.0787691	0.0854594	0.24202								0.126307	0.152219	0.280365	0.214699							0.0485953	0.0846746	0.0895881	0.0351828							0.10211	0.0689903	0.249024	0.184659							0.0441842	0.140801	0.260673
0.0707838	0.105265	0.0878166	0.0198757	0.0881863								0.205492	0.0678188	0.143566	0.2174							0.0567732	0.0905619	0.27473	0.0943945							0.244111	0.0824475	0.194595	0.297065							0.0224986	0.0187261	0.206105
0.0884925	0.043012	0.255112	0.0514701	0.215127								0.0868955	0.283592	0.23932	0.100108							0.109762	0.14384	0.14751	0.180263							0.310741	0.138358	0.147345	0.16046							0.0364336	0.228493	0.916399
0.387164	0.125241	0.17267	0.0463593	0.0979783								0.209837	0.113929	0.265034	0.244208							0.235012	0.076426	0.354781	0.150788							0.14863	0.0808457	0.0842013	0.133873							0.205463	0.087692	0.151889
0.0929334	0.195356	0.116958	0.0244708	0.0807329								0.231923	0.0684627	0.252084	0.0886009							0.0994467	0.100115	0.386622	0.29343							0.187774	0.14427	0.0891051	0.0446632							0.0179359	0.0148512	1.06589
0.123649	0.399297	0.234112	0.369901	0.286307								0.130321	0.244352	0.173329	0.0368546							0.038556	0.27103	0.194376	0.203241							0.077214	0.12718	0.0764467	0.0823871							0.11283	0.169383	0.110877
0.316625	0.411286	0.136586	0.0942379	0.126743								0.0556547	0.0903746	0.0534859	0.574485							0.125399	0.0829504	0.2595	0.275295							0.119465	0.0611259	0.276911	0.0170605							0.0771034	0.0227105	0.242691
0.445468	0.14849	0.255086	0.0636254	0.111838								0.159809	0.240922	0.0367211	0.197838							0.0784676	0.0607714	0.0972891	0.133063							0.141833	0.0893854	0.0303939	0.0490741							0.0130088	0.164068	0.0731446
0.425528	0.11654	0.0498972	0.176308	0.193913								0.133944	0.0304795	0.272958	0.209732							0.0878707	0.0943432	0.152674	0.148988							0.0862742	0.192294	0.100469	0.0512744							0.0739087	0.175449	0.0249547
0.820702	0.169172	0.317982	0.112994	0.125666								0.105545	0.0260001	0.0990763	0.08889							0.247945	0.0574859	0.198067	0.159296							0.068627	0.104086	0.062502	0.0476378							0.0495927	0.0815819	0.21252
0.10981	0.120795	0.109456	0.0502348	0.249195								0.269523	0.194067	0.0266721	0.069698							0.0474797	0.232645	0.171616	0.0461037							0.208394	0.202278	0.132169	0.0971225							0.132838	0.117483	0.176565
0.130363	0.11935	0.107462	0.310155	0.0501293								0.191483	0.106278	0.099124	0.189777							0.112238	0.0248083	0.0923065	0.086007							0.946869	0.154959	0.0811133	0.0809837							0.0374536	0.0598058	0.00657101
0.0538955	0.158875	0.0956946	0.0861549	0.281939								0.197232	0.409889	0.107611	0.103193							1.09382	0.747498	0.148422	0.251301							0.102314	0.0880561	0.0968632	0.1376							0.0345249	0.0554619	0.0798475
0.129095	0.263934	0.111892	0.114157	0.0679442								0.0421651	0.0837694	0.180558	0.151228							0.0971147	0.0432133	0.260999	0.123258							0.266001	0.142125	0.128829	0.136401							0.123735	0.061131	0.0713009
0.0982447	0.309297	0.212499	0.0700457	0.0278141								0.191876	0.13694	0.162967	0.133667							0.25453	0.0410769	0.239425	0.0170858							0.350829	0.267421	0.188797	1.04774							0.0703673	0.0519603	0.105043
0.0875657	0.0614571	0.241689	0.199862	0.148198								0.153043	0.355386	0.0327014	0.0585006							0.142449	0.0645997	0.295607	0.139644							0.144829	0.089856	0.105242	0.0606823							0.108193	0.0463682	0.120657
0.147207	0.125034	0.16957	0.043301	0.150014								0.0983284	0.315496	0.17998	0.0207862							0.142169	0.0346813	0.141831	0.0644219							0.0780394	0.0664363	0.30983	0.0183065							0.249439	0.156092	0.0871367
0.118783	0.106891	0.0296761	0.276904	0.11948								0.232885	0.207096	0.184462	0.123138							0.0623085	0.301298	0.0311099	0.185977							0.136618	0.232572	0.143293	0.109712							0.10618	0.0992457	0.0155496
0.124709	0.167045	0.0960878	0.0909029	0.0915013								0.298573	0.0881075	0.199528	0.0295761							0.0935764	0.117162	0.08907	0.0988513							0.19031	0.0320488	0.0100623	0.0909533							0.0647119	0.0114605	0.103575
0.328246	0.121426	0.116253	0.0930982	0.373648								0.0590602	0.0715005	0.129811	0.0550169							0.218321	0.226891	0.0581629	0.0402396							0.101893	0.093155	0.0736009	0.097618							0.141564	0.205724	0.134736
0.222871	0.110811	0.189777	0.093756	0.178255								0.38887	0.194951	0.074556	0.0987436							0.0210993	0.150183	0.127021	0.0342709							0.093884	0.0828303	0.123629	0.155611							0.0527008	0.27227	0.131161
0.208666	0.159095	0.151401	0.241252	0.189787								0.145192	0.105636	0.109115	0.0556347							0.0842129	0.0857003	0.0306615	0.106467							0.198034	0.011944	0.0964837	0.280879							0.0892507	0.280337	0.196432
0.231075	0.22794	0.156794	0.133585	0.239808								0.374893	0.174439	0.193336	0.0776511							0.186655	0.132061	0.019025	0.0662576							0.0558569	0.286732	0.0486824	0.208456							0.142619	0.0737364	0.139731
0.0417018	0.17253	0.291625	0.0788546	0.207426								0.136615	0.129074	0.262064	0.0637574							0.0304481	0.142187	0.0549173	0.172667							0.124687	0.254781	0.0854774	0.161479							0.0934478	0.239057	0.169418
0.48042	0.133968	0.154438	0.209292	0.214959								0.220399	0.224215	0.154394	0.979025							0.0588333	0.0745459	0.148863	1.00942							0.171563	0.0817928	0.0713213	0.0266603							0.0465469	0.315608	0.0518986
0.159111	0.0480085	0.224636	0.0647494	0.135416								0.163401	0.118004	0.063747	0.261292							0.115035	0.0427956	0.0541779	0.298096							0.219424	0.15583	0.0603023	0.0998917							0.0412611	0.110661	0.183515
0.0197016	0.0839079	0.0380337	0.0817373	0.15944								0.244981	0.0847432	0.131947	0.257591							0.245178	0.0414504	0.213771	0.0462852							0.0919391	0.130197	0.0191876	0.117716							0.277636	0.145103	0.194284
0.121715	0.0659987	0.135404	0.100182	0.13908								0.138552	0.146532	0.0669626	0.140172							0.226499	0.0404453	0.351766	0.194962							0.338051	0.348673	0.124349	0.179791							0.105735	0.0244461	0.118734
0.15583	0.0213147	0.0865938	0.11548	0.123772								0.0575194	0.21895	0.279867	0.168595							0.120119	0.3142	0.0299987	0.225513							0.0869811	0.308042	0.177594	0.0668912							0.0932042	0.185682	0.0732675
0.0638705	0.144398	0.311641	0.225931	0.182719								0.0383406	0.159941	0.122598	0.293034							0.0912293	0.102064	0.136774	0.259406							0.0492191	0.187753	0.166532	0.02436							0.300557	0.159521	0.108716
0.0130757	0.183182	0.202865	0.094866	0.17293								0.158287	0.179687	0.137069	0.183197							0.0455869	0.0652362	0.147209	0.0477991							0.073275	0.0514093	0.0841799	0.131505							0.0460302	0.147516	0.273829
0.0560711	0.182874	0.233447	0.508392	0.323533								0.178757	0.136314	0.125395	0.326926							0.240813	0.195041	0.487409	0.0517589							0.0503451	0.0418229	0.245023	0.138154							0.0608737	0.112902	0.0751051
0.187581	0.0685366	0.0661852	0.0762686	0.0753544								0.42544	0.578815	0.0968683	0.190776							0.251184	0.146555	0.0528259	0.0357859							0.0882087	0.10056	0.111129	0.114493							0.116423	0.122137	0.230822
0.108898	0.141358	0.108404	0.178752	0.0850222								0.0679611	0.0944722	0.0925162	0.259085							0.142539	0.174633	0.1288	0.14668							0.0517256	0.0936355	0.189285	0.130877							0.0336906	0.0536986	0.265618
0.0838775	0.143944	0.168345	0.195281	0.548526								0.114825	0.109532	0.424856	0.0875175							0.107369	0.215383	0.282635	0.0733097							0.0104829	0.0439685	0.162077	0.251634							0.113052	0.0826492	0.104212
0.0996792	0.190861	0.223109	0.0842029	0.0558379								0.10747	0.17471	0.0320179	0.0166437							0.25703	0.356767	0.119241	0.086265							0.0995685	0.261196	0.139093	0.0925231							0.366267	0.0753151	0.125614
0.0515258	0.286202	0.862458	0.219648	0.17371								0.0865854	0.146023	0.0499045	0.156019							0.150601	0.0228034	0.0175404	0.146112							0.107015	0.132268	0.0592132	0.0708833							0.0521215	0.206051	0.304999
0.153903	0.123623	0.088546	0.156737	0.165023								0.165603	0.199348	0.292738	0.0442454							0.172671	0.381771	0.173142	0.0747095							0.372596	0.162197	0.165726	0.30356							0.115128	0.260229	0.0534585
0.0529611	0.120578	0.0993348	0.164027	0.0808427								0.125006	0.125453	0.138851	0.182031							0.204149	0.252092	0.218367	0.070286							0.00821193	0.161269	0.157131	0.0818539							0.290988	0.0746118	0.148316
0.208393	0.0374664	0.213704	0.0914384	0.183609								0.198943	0.186938	0.0641016	0.273403							0.141198	0.187394	0.413689	0.157154							0.0691242	0.181453	0.26517	0.0119613							0.0327335	0.195472	0.0580148
0.164156	0.267803	0.174146	0.188469	0.212133								0.180555	0.229793	0.0649911	0.169452							0.779768	0.250232	0.143718	0.298569							0.0151951	0.102159	0.263764	0.0793951							0.0861788	0.0320416	0.0373189
0.167117	0.0953459	0.267516	0.28236	0.201114								0.173851	0.0838892	0.0644043	0.0377992							0.0825727	0.0956696	0.195628	0.21237							0.0732354	0.134995	0.0828611	0.0850815							0.0356874	0.111971	0.0577248
0.119661	0.205974	0.120806	0.0986822	0.261265								0.202687	0.222642	0.0703231	0.329928							0.0411022	0.0806148	0.307525	0.187798							0.112399	0.222294	0.0684499	0.187551							0.0134892	0.149197	0.11347
0.253411	0.277425	0.159673	0.183795	0.136478								0.116388	0.109272	0.267555	0.114373							0.168501	0.118119	0.18208	0.115068							0.12974	0.0215132	0.26327	0.261692							0.0484822	0.0516375	0.0315099
0.125781	0.395749	0.178778	0.111561	0.146429								0.0310808	0.203996	0.717466	0.0642401							0.188058	0.153574	0.0409935	0.115874							0.0823614	0.0845774	0.238223	0.139474							0.0661306	0.21222	0.0688657
0.173115	0.226672	0.0954808	0.398943	0.106564								0.112323	0.113638	0.236313	0.227276							0.149058	0.200986	0.0461528	0.156293							0.244505	0.269945	0.0636581	0.140602							0.035543	0.996782	0.0148208
0.419768	0.187716	0.248764	0.297182	0.171642								0.223254	0.0239203	0.106962	0.179059							0.349792	0.104869	0.167266	0.150452							0.148301	0.150639	0.0312913	0.0147467							0.0196305	0.092507	0.0623923
0.125684	0.106625	0.0496298	0.113873	0.141207								0.28972	0.0631597	0.061624	0.268744							0.205323	0.0548071	0.0699377	0.0712033							0.0991433	0.106776	0.0337036	0.0895872							0.0851965	0.087024	0.033313
0.12797	0.118569	0.0599394	0.0475125	0.215248								0.111657	0.0675767	0.252171	0.284261							0.104117	0.0797457	0.0672535	0.0273051							0.151686	0.106925	0.2277	0.0793419							0.0318626	0.124362	0.188681
0.100553	0.0476403	0.0644096	0.734131	0.133368								0.222855	0.0199984	0.0909989	0.155538							0.0477277	0.0262928	0.0714499	0.0686926							0.211143	0.193303	0.0705519	0.0228958							0.132977	0.00929579	0.032201
0.064683	0.178806	0.0429014	0.0823215	0.0695913								0.133062	0.195683	0.376963	0.217559							0.0583666	0.0466461	0.0815212	0.247445							0.159738	0.146607	0.225476	0.153622							0.106761	0.145068	0.033847
0.0845622	0.243841	0.102051	0.210033	0.099936								0.197746	0.123786	0.214426	0.158335							0.64775	0.214266	0.127023	0.167442							0.105753	0.106071	0.0698862	0.141077							0.0257308	0.0911816	0.11564
0.349249	0.180557	0.175353	0.0346441	0.212556								0.174009	0.0612784	0.342802	0.154754							0.150238	0.194974	0.092119	0.0917081							0.0825221	0.0805637	0.214878	0.139296							0.0547761	0.0366684	0.0414687
0.0845777	0.189061	0.185864	0.0914598	0.138867								0.129446	0.0863314	0.241827	0.128086							0.12313	0.213965	0.0601074	0.22524							0.0632415	0.0458598	0.0349634	0.195516							0.0416425	0.0590752	0.0354472
0.170952	0.448134	0.176238	0.212517	0.13297								0.170468	0.115624	0.262802	0.315018							0.195751	0.203365	0.0628012	0.169021							0.121054	0.124376	0.133576	0.226067							0.0364184	0.135455	0.22645
0.189874	0.231772	0.341292	0.0546084	0.0505875								0.0929602	0.160307	0.268042	0.18568							0.159303	0.0994684	0.0803052	0.119465							0.162462	0.145602	0.0566385	0.115552							0.0594007	0.0345003	0.364341
0.0978305	0.110063	0.0649818	0.157233	0.142871								0.013857	0.252433	0.299795	0.124849							0.442578	0.383244	0.0822019	0.214653							0.0320844	0.0622414	0.0538758	0.120478							0.0608228	0.0399563	0.0155637
0.0946752	0.0277708	0.146266	0.203033	0.0684943								0.168716	0.203004	0.062528	0.101767							0.050521	0.117418	0.114681	0.209279							0.191195	0.185428	0.0700609	0.109182							0.0134937	0.0597799	0.0089475
0.688002	0.228574	0.100164	0.0292794	0.218211								0.154889	0.168676	0.162109	0.144464							0.0962068	0.345399	0.0577338	0.218192							0.0466109	0.0871939	0.050304	0.0895358							0.0406524	0.0768165	0.076438
0.144585	0.194935	0.298708	0.096022	0.0719566								0.140599	0.0469098	0.312593	0.156718							0.292716	0.177917	0.108823	0.022868							0.113272	0.102667	0.0342137	0.0273822							0.124733	0.229278	0.293319
0.153662	0.0837294	0.398781	0.119661	0.219435								0.140493	0.0167997	0.0743689	0.179749							0.327848	0.119801	0.22298	0.246023							0.107386	0.181667	0.064626	0.0552008							0.174531	0.254644	0.0641374
0.12724	0.215644	0.266052	0.0805584	0.107809								0.256628	0.0612613	0.069354	0.20871							0.146308	0.398749	0.501372	0.0566855							0.184619	0.00995336	0.0289496	0.124562							0.292523	0.0545103	0.0939534
0.0305294	0.211359	0.177131	0.188139	0.216092								0.203314	0.0890781	0.212452	0.234176							0.128837	0.108774	0.161733	0.050701							0.0894617	0.0933565	0.124936	0.0571922							0.31201	0.00570145	0.0409884
0.259952	0.117333	0.121312	0.66188	0.0411666								0.0741421	0.169582	0.260282	0.635161							0.119221	0.265436	0.202853	0.0584355							0.0912867	0.287476	0.164817	0.0386947							0.0548697	0.155766	0.0870252
0.170782	0.108599	0.0850249	0.141095	0.0745602								0.200736	0.180584	0.0956223	0.124219							0.234959	0.0936146	0.0918032	0.0813479							0.213502	0.173018	0.158536	0.0784295							0.181427	0.0455225	0.060961
0.0982708	0.213953	0.113301	0.170494	0.142836								0.161539	0.133232	0.110887	0.0957062							0.185342	0.121161	0.293235	0.329562							0.0852973	0.166992	0.238109	0.479507							0.386637	0.229881	0.361555
0.127542	0.0940081	0.565087	0.117224	0.183988								0.290852	0.0885336	0.291868	0.15565							0.0239663	0.249981	0.126024	0.0420639							0.133764	0.124314	0.256883	0.18974							0.0973579	0.100733	0.221809
0.138497	0.0832082	0.163532	0.14509	0.182218								0.28168	0.249666	0.0236242	0.0779144							0.32105	0.119492	0.176099	0.0947243							0.0515654	0.206451	0.103454	0.235334							0.0890404	0.211497	0.0788651
0.766198	0.27497	0.184827	0.103223	0.341955								0.105388	0.267357	0.161165	0.182136							0.241685	0.108846	0.113424	0.057961							0.0281769	0.122256	0.316028	0.381338							0.0611926	0.16049	0.1628
0.308994	0.135965	0.10897	0.212511	0.0914578								0.163302	0.143254	0.11458	0.119891							0.174211	0.0972415	0.0764945	0.052895							0.0463747	0.227252	0.416334	0.294123							0.108858	0.145064	0.24726
0.142251	0.20767	0.051491	0.196131	0.0218967								0.0926411	0.153394	0.14655	0.232046							0.314387	0.235357	0.0473576	0.662813							0.0410822	0.116332	0.124471	0.164713							0.117156	0.0276703	0.212379
0.226781	0.0899622	0.181085	0.24949	0.151149								0.129088	0.154237	0.130797	0.339131							0.251327	0.10515	0.136108	0.137588							0.0328173	0.144817	0.139874	0.141232							0.107251	0.174029	0.245276
0.128071	0.123729	0.141448	0.190755	0.139939								0.123301	0.0666205	0.139607	0.0294357							0.174446	0.191724	0.0226966	0.115942							0.0400214	0.115839	0.104997	0.0683492							0.124283	0.190942	0.0656094
0.19664	0.0660344	0.234006	0.12352	0.172762								0.189166	0.0522116	0.242243	0.0808733							0.115375	0.0229499	0.159275	0.0910194							0.01404	0.0664984	0.116837	0.0215596							0.118341	0.10231	0.0948243
0.630401	0.236094	0.18603	0.0988351	0.316395								0.329474	0.216556	0.18241	0.114258							0.0961675	0.279715	0.201533	0.188844							0.0987234	0.0735608	0.164695	0.296508							0.187931	0.0962766	0.0482523
0.0999376	0.419785	0.205791	0.144601	0.0348962								0.0988778	0.167851	0.102035	0.236611							0.0495542	0.195989	0.187144	0.0618572							0.176293	0.156601	0.377863	0.195905							0.0320584	0.0739385	0.0761309
0.105799	0.155417	0.234163	1.05148	0.239354								0.0363385	0.156985	0.172763	0.106791							0.0769069	0.088563	0.0677616	0.18697							0.122959	0.0624968	0.107493	0.347657							0.0432997	0.166912	0.121661
0.461213	0.0453385	0.144748	0.71955	0.119996								0.1168	0.201779	0.143652	0.301719							0.0303898	0.205224	0.22881	0.0632378							0.0850944	0.104147	0.0542748	0.111696							0.094539	0.0823628	0.101535
0.149874	0.0736479	0.145301	0.0546447	0.109043								0.344512	0.00690363	0.0562329	0.161995							0.0831799	0.24756	0.229926	0.181705							0.0371035	0.168458	0.10891	0.139588							0.0267865	0.20799	0.170323
0.0454256	0.101532	0.150782	0.0844229	0.180353								0.388064	0.0685577	0.121974	0.216775							0.203929	0.156977	0.306023	1.09723							0.150639	0.20246	0.238186	0.113494							0.03215	0.167737	0.135273
0.3009	0.280662	0.198304	0.26607	0.0878394								0.199137	0.132834	0.239777	0.015176							0.232575	0.333253	0.062127	0.173889							0.0622316	0.0699956	0.168674	0.189864							0.016585	0.190429	0.0635911
0.193599	0.0950185	0.222207	0.140337	0.15617								0.18163	0.159347	0.0806778	0.12396							0.44014	0.103787	0.3212	0.284744							0.153424	0.0171378	0.147691	0.0416533							0.037054	0.0584636	0.270254
0.171324	0.163122	0.187242	0.156438	0.149918								0.247513	0.0690669	0.0803724	0.331778							0.0646474	0.0339637	0.0510633	0.0834302							0.0113951	0.0196236	0.059935	0.0945496							0.293518	0.0555829	0.0230779
0.161485	0.348985	0.138224	0.143518	0.24582								0.0419815	0.149154	0.0502663	0.025923							0.115404	0.0231953	0.121361	0.119244							0.108131	0.05356	0.0922248	0.162092							0.354559	0.03447	0.0398496
0.0512091	0.71762	0.0367592	0.152125	0.221418								0.129169	0.273033	0.274554	0.0643707							0.0676002	0.089623	0.21897	0.0793831							0.150976	0.0912954	0.011289	0.177283							0.145973	0.145671	0.11873
0.173076	0.0829459	0.256299	0.0185206	0.0624023								0.0342071	0.633961	0.0684671	0.982128							0.062706	0.0461578	0.147556	0.122313							0.275092	0.115327	0.141809	0.136857							0.0859371	0.33761	0.224371
0.113213	0.151286	0.0512942	0.173694	0.0512067								0.0238574	0.231163	0.177562	0.387489							0.264555	0.108475	0.141858	0.742981							0.0810469	0.00631051	0.116103	0.058072							0.019768	0.172733	0.151653
0.0422172	0.349289	0.151474	0.219862	0.0656271								0.0547634	0.0647044	0.305302	0.0944163							0.105209	0.211943	0.145482	0.189137							0.110365	0.040392	0.236243	0.0480708							0.0379871	0.159074	0.152263
0.200704	0.0916694	0.0463272	0.132586	0.0835368								0.111273	0.113361	0.103148	0.323039							0.172379	0.327222	0.252735	0.0883852							0.0189318	0.179921	0.300394	0.102577							0.0402834	0.0086576	0.308504
0.219453	0.106718	0.181323	0.148779	0.281741								0.0800098	0.167654	0.123801	0.372621							0.0465029	0.0799072	0.166381	0.0106381							0.130453	0.188877	0.150496	0.134299							0.182194	0.0898949	0.059583
0.074774	0.112127	0.311151	0.150997	0.149956								0.134508	0.0855791	0.141696	0.250408							0.0253014	0.229637	0.323425	0.230473							0.137359	0.0104652	0.207041	0.350236							0.226891	0.123806	0.174809
0.152459	0.104098	0.142871	0.123677	0.178194								0.211404	0.216509	0.208329	0.102356							0.154172	0.0653085	0.110103	0.216941							0.21487	0.199116	0.207985	0.283846							0.0881172	0.267633	0.0462319
0.191441	0.219926	0.0924224	0.467029	0.0244741								0.252366	0.0821415	0.22261	0.0359931							0.225944	0.122352	0.229227	0.188998							0.44755	0.212472	0.0745098	0.183624							0.0405832	0.15334	0.0264902
0.177608	0.113832	0.158824	0.103547	0.120692								0.2731	0.0906359	0.126502	0.0426603							0.128903	0.26625	0.249219	0.0919074							0.0936805	0.33533	0.410352	0.0793044							0.112712	0.0390945	0.0750957
0.15182	0.135626	0.113894	0.11612	0.285681								0.194182	0.0846791	0.636862	0.412042							0.0520576	0.103608	0.181456	0.166998							0.0932006	0.0144614	0.0567087	0.0491682							0.190344	0.0961023	0.240811
0.0395832	0.110388	0.163147	0.658195	0.182197								0.199513	0.148978	0.199183	0.331099							0.187834	0.186448	0.224673	0.165576							0.117099	0.25778	0.0685062	0.064406							0.0832407	0.0873786	0.0882456
0.0835966	0.0705313	0.270361	0.168635	0.121231								0.0297287	0.103484	0.0500715	0.18303							0.0215773	0.119412	0.808619	0.228268							0.139671	0.202147	0.30299	0.205049							0.133759	0.0528537	0.0743045
0.352008	0.0883546	0.312395	0.0388466	0.246118								0.230683	0.12891	0.124654	0.0634892							0.276144	0.0394791	0.0727464	0.299437							0.134645	0.113241	0.0911428	0.0842916							0.403763	0.0825443	0.160683
0.0933975	0.0675874	0.250204	0.058175	0.0975211								0.259522	0.128923	0.0719692	0.16747							0.218266	0.11586	0.0467849	0.486375							0.0535717	0.125267	0.140931	0.0770562							0.0896456	0.124165	0.152808
0.128464	0.252489	0.165308	0.185098	0.0636808								0.208537	0.0727684	0.251743	0.284318							0.0180026	0.0499336	0.0521686	0.228083							0.0476139	0.120621	0.150535	0.351966							0.0966381	0.0839038	0.0849856
0.260754	0.0982205	0.038683	0.18785	0.169289								0.155256	0.0429201	0.137651	0.190737							0.2356	0.126608	0.136316	0.777708							0.0962969	0.0122937	0.0865716	0.209938							0.125254	0.0469401	0.0523096
0.175286	0.0796924	0.298273	0.465113	0.0757539								0.0969432	0.0696842	0.207079	0.036454							0.103354	0.321004	0.147421	0.105895							0.0668855	0.107103	0.0563801	0.295141							0.270175	0.0413759	0.0814047
0.245436	0.0798886	0.209935	0.0973359	0.0670888								0.375553	0.0866763	0.205696	0.197549							0.0705976	0.0671333	0.229559	0.267044							0.0920006	0.168071	0.257558	0.890606							0.291058	0.292271	0.1067
0.122779	0.168952	0.24973	0.175148	0.337438								0.213342	0.0812686	0.147199	0.0815378							0.0748872	0.0764577	0.232074	0.122825							0.634109	0.197749	0.0612836	0.162903							0.0187709	0.0806681	0.162122
0.339344	0.131172	0.112555	0.0879706	0.243778								0.150929	0.0557762	0.113083	0.093984							0.125632	0.184078	0.0546216	0.42728							0.24536	0.0693292	0.169005	0.0715679							0.259136	0.031777	0.101573
0.404817	0.161404	0.089184	0.259873	0.179744								0.419594	0.132718	0.591501	0.208969							0.113253	0.212908	0.0957484	0.18944							0.306785	0.120051	0.153492	0.164352							0.108121	0.0389545	0.0857828
0.0581394	0.144073	0.0754609	0.230323	0.129125								0.0137966	0.0995184	0.0338365	0.0962869							0.152904	0.203224	0.0643847	0.0587883							0.208521	0.115639	0.229298	0.0437896							0.178329	0.0418512	0.108124
0.0651459	0.146466	0.0585167	0.0850474	0.126433								0.135336	0.129515	0.146117	0.0787095							0.174254	0.241127	0.0724476	0.0480681							0.0649176	0.144133	0.0434147	0.202448							0.0550678	0.0291641	0.136635
0.0724948	0.104426	0.92314	0.217202	0.0983514								0.113516	0.111282	0.133766	0.161225							0.379648	0.0581451	0.060692	0.0748464							0.0719229	0.144806	0.0480939	0.234981							0.153903	0.0452934	0.103737
0.0482184	0.0659263	0.103775	0.184707	0.0554379								0.120248	0.102383	0.206551	0.062951							0.116436	0.0740844	0.310535	0.0963105							0.0618654	0.0793068	0.0846518	0.227409							0.0749161	0.042217	0.055194
0.216024	0.132325	0.120932	0.323581	0.0754496								0.194178	0.0554941	0.319772	0.0839611							0.125968	0.0902218	0.292324	0.0569305							0.105252	0.158171	0.27447	0.0782538							0.0414354	0.019795	0.0884885
0.13267	0.105694	0.152583	0.212593	0.240118								0.188249	0.0592562	0.0771345	0.769499							0.0827012	0.434902	0.104393	0.201707							0.0438643	0.037345	0.105573	0.0543712							0.0390769	0.099297	0.070323
0.201255	0.0742807	0.0589916	0.169474	0.216992								0.405578	0.0575669	0.435025	0.033722							0.0789063	0.293663	0.100185	0.156495							0.0355644	0.108745	0.0689357	0.0576918							0.0899102	0.0530882	0.225581
0.25899	0.183236	0.124657	0.166054	0.122191								0.0950601	0.113849	0.212073	0.04687							0.0844077	0.304927	0.246368	0.231885							0.245992	0.169459	0.199573	0.0764461							0.100621	0.0514783	0.299633
0.318736	0.196919	0.272065	0.162924	0.100321								0.276064	0.186125	0.389349	0.207215							0.335944	0.0817387	0.125389	0.118804							0.0939411	0.0688897	0.0951942	0.0727585							0.301181	0.057317	0.0268729
0.253941	0.249405	0.0509643	0.184905	0.0222697								0.225734	0.342103	0.332392	0.0390507							0.0310804	0.348794	0.168566	0.205916							0.051099	0.0744767	0.11186	0.0290866							0.0703921	0.1488	0.140891
0.116669	0.0996413	0.0641102	0.180182	0.336097								0.154899	0.0674233	0.242191	0.373192							0.111347	0.0756867	0.297684	0.155809							0.0622971	0.058593	0.0252529	0.423947							0.112568	0.114679	0.0876588
0.0556967	0.0794556	0.0789143	0.0807041	0.269294								0.216958	0.247288	0.121804	0.204465							0.152639	0.0811672	0.219923	0.109274							0.167316	0.13311	0.114219	0.013669							0.0901022	0.168868	0.101224
0.220049	0.105196	0.0585395	0.159636	0.118091								0.0823168	0.0891739	0.0401808	0.185929							0.0611105	0.101915	0.13326	0.131623							0.0996382	0.284303	0.21019	0.0605318							0.0430019	0.224808	0.137259
0.178986	0.224462	0.0406277	0.086417	0.225527								0.219643	0.156215	0.274691	0.316358							0.124803	0.203916	0.220886	0.331744							0.0782599	0.108758	0.1101	0.218133							0.028939	0.0535461	0.130807
0.170387	0.127242	0.141394	0.0843382	0.182831								0.0949917	0.248288	0.122139	0.185405							0.0456405	0.066267	0.136493	0.1236							0.0410141	0.153898	0.0748766	0.0684753							0.0948193	0.0919408	0.0170694
0.277486	0.244699	0.573321	0.126058	0.227493								0.206444	0.172385	0.0721476	0.402712							0.0789888	0.0812185	0.2271	0.0769404							0.0862669	0.0901537	0.0823158	0.140148							0.180447	0.099464	0.167673
0.495665	0.150774	0.176855	0.133139	0.375586								0.326722	0.0886947	0.116484	0.0985355							0.239925	0.0360602	0.475749	0.261389							0.060907	0.0662327	0.0949508	0.173156							0.0984207	0.0297207	0.0444163
0.126788	0.0656098	0.180094	0.0831232	0.278405								0.227562	0.104756	0.101314	0.264152							0.108444	0.187645	0.215993	0.0574615							0.0394104	0.111572	0.460315	0.153227							0.215241	0.138221	0.0174142
0.190899	0.167086	0.112214	0.20391	0.164362								0.0829196	0.110757	0.182058	0.127017							0.248978	0.228383	0.115502	0.147446							0.914058	0.185134	0.205141	0.0884122							0.0897827	0.141545	0.178018
0.142777	0.104775	0.0824877	0.0602298	0.0410875								0.178207	0.0516455	0.0731741	0.235907							0.424265	0.101256	0.0927866	0.0798555							0.196261	0.208922	0.125379	0.110647							0.121245	0.112168	0.110692
0.244629	0.119416	0.388227	0.17783	0.0542926								0.0333449	0.068289	0.276658	0.0845569							0.263312	0.00899801	0.0543842	0.241936							0.100481	0.192606	0.287114	0.0602041							0.202711	0.127188	0.120332
0.0335798	0.0731448	0.0969121	0.185484	0.173491								0.230707	0.0808866	0.105558	0.0762697							0.36096	0.192262	0.158436	0.258458							0.173512	0.0689223	0.112781	0.0895642							0.0644506	0.06415	0.115242
0.168542	0.0668551	0.112724	0.11287	0.257562								0.10851	0.0568363	0.15774	0.165057							0.125727	0.109385	0.0380812	0.19911							0.330833	0.0935563	0.0855781	0.0472483							0.0799868	0.0732878	0.142012
0.189871	0.0885107	0.0977765	0.129232	0.0473334								0.2875	0.299272	0.0376094	0.150466							0.163473	0.0532456	0.107381	0.165196							0.204047	0.045355	0.0422221	0.0404228							0.171516	0.299691	0.0869567
0.105732	0.191764	0.17285	0.20222	0.10371								0.406356	0.2476	0.269884	0.177243							0.207287	0.189542	0.0307434	0.164743							0.163064	0.0466177	0.216239	0.0622254							0.149979	0.0545878	0.134005
0.268831	0.198241	0.128571	0.115071	0.0969751								0.272517	0.0947093	0.0843504	0.0248859							0.0589879	0.196581	0.153225	0.0975769							0.0625048	0.0756879	0.129511	0.130477							0.183937	0.224958	0.134446
0.137374	0.0654552	0.24038	0.0801405	0.0393187								0.090896	0.209009	0.0567075	0.0874023							0.142456	0.111695	0.19694	0.0921655							0.0984205	0.191835	0.0914604	0.0694908							0.454024	0.755456	0.120541
0.140617	0.253757	0.045689	0.116873	0.226505								0.00836751	0.0595461	0.0784863	0.124567							0.0990798	0.178705	0.167354	0.109692							0.744733	0.0718535	0.232377	0.0994192							0.133355	0.462376	0.0479186
0.0560061	0.135152	0.142596	0.28351	0.0924305								0.236921	0.148799	0.0474121	0.118099							0.132246	0.348349	0.173236	0.072147							0.102626	0.097783	0.127645	0.166719							0.693812	0.0532198	0.245403
0.0798554	0.0557825	0.579927	0.232236	0.22257								0.211339	0.133552	0.11778	0.0639687							0.0949581	0.0331141	0.25238	0.151982							0.0642686	0.0888085	0.0706554	0.143256							0.209347	0.0700787	0.269228
0.0673321	0.0327185	0.0983013	0.0296663	0.145423								0.202592	0.067115	0.199913	0.028821							0.593506	0.260781	0.0998031	0.105885							0.0519609	0.2084	0.269683	0.158828							0.0353518	0.0501338	0.105557
0.110547	0.108666	0.0708726	0.0554496	0.0564206								0.139087	0.0799598	0.236726	0.044949							0.0863948	0.290489	0.0795625	0.292165							0.0504621	0.167925	0.252027	0.165257							0.0524282	0.0869004	0.0293952
0.166845	0.0366916	0.107371	0.125494	0.104325								0.0485326	0.0363218	0.0620525	0.122863							0.11984	0.0762471	0.10956	0.191419							0.0864359	0.156726	0.187654	0.0546757							0.0649585	0.0770862	0.123727
0.0534357	0.203737	0.186396	0.25747	0.66055								0.234331	0.0940127	0.0457213	0.242115							0.105424	0.0746152	0.09629	0.221828							0.188973	0.115173	0.151635	0.166492							0.166404	0.194471	0.0706201
0.112216	0.281191	0.0932476	0.196019	0.0717227								0.143675	0.265195	0.0488933	0.167202							0.0560075	0.077768	0.172711	0.353797							0.181785	0.0717097	0.0875718	0.136883							0.0295637	0.252139	0.19243
0.464595	0.0864934	0.0770926	0.242569	0.0949437								1.03385	0.166165	0.0643457	0.145168							0.0531601	0.0751502	0.276498	0.117151							0.248805	0.118892	0.0798116	0.110434							0.0420548	0.232091	0.0892718
0.366691	0.0214515	0.12402	0.139755	0.90982								0.181618	0.183276	0.135271	0.143188							0.0644338	0.18104	0.179935	0.135861							0.210004	0.0282694	0.16633	0.138822							0.182731	0.111419	0.0825748
0.232663	0.494077	0.0327801	0.0687237	0.310383								0.284398	0.512454	0.023267	0.186556							0.051752	0.29636	0.11837	0.0519534							0.187668	0.223762	0.190976	0.0989227							0.0541325	0.026642	0.0681418
0.0406427	0.133536	0.152177	0.148603	0.170073								0.0883789	0.120792	0.128017	0.0562573							0.0297663	0.227569	0.0593824	0.171612							0.0383107	0.690769	0.205242	0.0747768							0.21437	0.121859	0.103776
0.0555212	0.136995	0.156905	0.168682	0.166599								0.19211	0.206102	0.100164	0.127732							0.0217019	0.268031	0.0437423	0.167105							0.162693	0.129146	0.13747	0.116831							0.217519	0.0253458	0.0893277
0.0608341	0.0327563	0.0896599	0.155293	0.219091								0.0763118	0.0567196	0.187459	0.220619							0.128819	0.0922892	0.173693	0.170717							0.13294	0.0505676	0.340555	0.299698							0.0938894	0.0353481	0.0833584
0.0389056	0.181895	0.591461	0.157516	0.257998								0.0642132	0.126477	0.291614	0.126345							0.0666958	0.0816333	0.0693465	0.011036							0.0927811	0.211871	0.0995634	0.0882442							0.126887	0.136045	0.0595116
0.326934	0.291711	0.186084	0.323532	0.170035								0.368184	0.335229	0.0338919	0.184875							0.0690063	0.252793	0.234934	0.253066							0.0256491	0.15346	0.240184	0.142517							0.156808	0.142513	0.152242
0.0447639	0.183345	0.0906079	0.152134	0.0330468								0.153175	0.0108061	0.0753607	0.0851832							0.0522561	0.320248	0.290498	0.35782							0.227399	0.0276099	0.0392906	0.0507337							0.102222	0.215681	0.0193752
0.1057	0.0725857	0.149611	0.157962	0.0756082								0.143453	0.117971	0.109243	0.106819							0.0292856	0.0830818	0.140121	0.161649							0.0882952	0.137332	0.0756043	0.0979891							0.163805	0.245352	0.0871284
0.0500374	0.0620714	0.122225	0.144519	0.0216192								0.139007	0.152791	0.102401	0.0536371							0.167615	0.0775247	0.234386	0.163388							0.115272	0.0462249	0.105373	0.0243573							0.230752	0.180912	0.167027
0.324593	0.123922	0.113569	0.0797407	0.122626								0.14828	0.17435	0.18137	0.893122							0.156893	0.471908	0.936864	0.195142							0.532857	0.0792152	0.010021	0.109841							0.0453165	0.106721	0.21707
0.158661	0.171649	0.0893617	0.188311	0.0624895								0.130496	0.201141	0.088449	0.191821							0.141845	0.0754058	0.175967	0.159703							0.0837243	0.0666019	0.0699567	0.148576							0.220321	0.040387	0.166608
0.0722606	0.281116	0.104999	0.0571927	0.212343								0.184733	0.242681	0.165523	0.409462							0.152035	0.226452	0.202407	0.11384							0.0458222	0.332895	0.0353354	0.123701							0.129054	0.158155	0.149284
0.205241	0.238879	0.0502951	0.181844	0.120336								0.171412	0.290281	0.237796	0.207826							0.426397	0.111623	0.238355	0.348231							0.0279007	0.0847262	0.046616	0.164731							0.102605	0.183422	0.023948
0.0697111	0.358055	0.235385	0.169479	0.220622								0.163174	0.0586828	0.0315781	0.0966555							0.291194	0.079733	0.163847	0.0872271							1.03054	0.092949	0.0209259	0.234354							0.0308919	0.0867531	0.0534014
0.104645	0.272261	0.039125	0.155101	0.133568								0.154114	0.120976	0.0512328	0.226399							0.161018	0.08084	0.100696	0.148759							0.194448	0.153386	0.193062	0.28603							0.0196806	0.0439072	0.0136802
0.116531	0.254876	0.374646	0.174517	0.159436								0.096879	0.308836	0.0701686	0.289456							0.11684	0.175149	0.211152	0.123802							0.114578	0.153562	0.0462183	0.0809722							0.153438	0.0868434	0.134132
0.130498	0.376146	0.0158551	0.255785	0.110757								0.491452	0.108946	0.165855	0.198989							0.097951	0.0329583	0.112875	0.230794							0.0355536	0.0962966	0.0544285	0.090015							0.29242	0.134695	0.25632
0.0412535	0.184018	0.32468	0.201501	0.0348676								0.153623	0.0939076	0.24924	0.142209							0.228057	0.223881	0.31448	0.0984599							0.0484597	0.0548716	0.0546648	0.0885989							0.253774	0.0207486	0.0401898
0.116787	0.157711	0.0940205	0.113833	0.0651927								0.0941399	0.112464	0.156941	0.239086							0.0268869	0.189937	0.141831	0.224077							0.167998	0.0349682	0.0976968	0.134902							0.165464	0.123558	0.0504736
0.0625643	0.117196	0.0966139	0.0351016	1.0186								0.0799471	0.213151	0.0948164	0.185591							0.218028	0.0569765	0.0152121	0.153055							0.0666818	0.141743	0.18085	0.145477							0.146642	0.0717334	0.126864
0.182358	0.121558	0.0848466	0.225295	0.0786403								0.0226677	0.905441	0.0799836	0.0218493							0.112466	0.0610201	0.143199	0.0540559							0.0511808	0.0923983	0.0823632	0.255737							0.107724	0.0564586	0.087073
0.0385892	0.203546	0.0930833	0.0227649	0.0942192								0.0806918	0.168105	0.0812148	0.525663							0.29176	0.120039	0.0423548	0.0246644							0.0959829	0.230996	0.0125724	0.0337827							0.14081	0.0796156	0.0514121
0.0741642	0.359813	0.0788909	0.0942207	0.201796								0.3227	0.218978	0.384114	0.181335							0.0865379	0.147746	0.0190307	0.110367							0.0322525	0.0282243	0.0239882	0.0670256							0.158066	0.0422129	0.117586
0.0369435	0.197529	0.0879737	0.0537999	0.130333								0.248412	0.0445111	0.178819	0.0853743							0.16234	0.132158	0.154867	0.172865							0.113887	0.10124	0.0501367	0.138729							0.19537	0.158137	0.146318
0.10165	0.317501	0.0221265	0.175834	0.207732								0.1375	0.315867	0.183161	0.190925							0.274397	0.255392	0.114605	0.0184213							0.051347	0.0950287	0.241619	0.168764							0.177665	0.0659601	0.115102
0.124146	0.14	0.273705	0.2282	0.28136								0.127859	0.0730205	0.0494994	0.111							0.193423	0.156761	0.0532393	0.153626							0.077064	0.0908265	0.35214	0.188818							0.0979289	0.031109	0.103977
0.216434	0.272655	0.0695732	0.29673	0.0710118								0.116512	0.0262918	0.14789	0.220401							0.0983294	0.142346	0.100158	0.115053							0.447435	0.103515	0.087066	0.155254							0.194176	0.196633	0.147267
0.073498	0.132179	0.291173	0.145576	0.13943								0.966561	0.0927068	0.14767	0.140162							0.0727951	0.0902358	0.0956203	0.0770097							0.0628697	0.14306	0.0729623	0.039125							0.0324591	0.137772	0.235753
0.105285	0.0619034	0.078855	0.0870825	0.0347433								0.141116	0.10951	0.0374816	0.33109							0.102003	0.0479236	0.143634	0.0908128							0.174182	0.0706072	0.055483	0.193787							0.183805	0.124176	0.108953
0.13997	0.106308	0.123891	0.158985	0.223033								0.0900655	0.0515947	0.0879498	0.162234							0.123261	0.208576	0.168334	0.674936							0.649488	0.0531808	0.207258	0.188916							0.124334	0.0622194	0.213174
0.0799226	0.054825	0.239036	0.347413	0.240723								0.0414017	0.0582854	0.134721	0.118496							0.176588	0.164984	0.152864	0.0834616							0.19571	0.124763	0.116482	0.0679028							0.0924533	0.0356822	0.361169
0.256572	0.365349	0.312766	0.214253	0.129689								0.162298	0.0206306	0.72918	0.161251							0.0735968	0.0844127	0.203422	0.267915							0.118316	0.374285	0.157374	0.0960154							0.144147	0.122509	0.251028
0.2286	0.0450813	0.169903	0.143028	0.0470754								0.015534	0.117309	0.0467462	0.062253							0.287886	0.182783	0.0627697	0.365005							0.949475	0.0244274	0.232503	0.0518576							0.25849	0.0125996	0.149011
0.170394	0.392951	0.0900365	0.213353	0.263526								0.0259836	0.217376	0.0645674	0.294456							0.151118	0.196844	0.157006	0.159619							0.18526	0.0715744	0.0828148	0.0701918							0.175698	0.124585	0.228368
0.162506	0.16731	0.232745	0.214084	0.860414								0.0787619	0.184643	0.0577804	0.159056							0.0397821	0.316932	0.0735136	0.232045							0.212165	0.0662899	0.0869467	0.0393213							0.0363241	0.120193	0.34942
0.192174	0.052802	0.243389	0.0666376	0.108221								0.0750497	0.238794	0.879756	0.114397							0.0665867	0.0440089	0.313032	0.473292							0.0620835	0.150726	0.216226	0.33235							0.0520949	0.0844735	0.689375
0.290152	0.133808	0.126942	0.161678	0.127906								0.0834307	0.27757	0.0450377	0.171961							0.0980977	0.186103	0.148303	0.152777							0.0449373	0.0834283	0.109561	0.370067							0.15877	0.194224	0.64399
0.436241	0.173147	0.0441096	0.247095	0.241889								0.0209529	0.248825	0.117956	0.0521453							0.131139	0.235894	0.320185	0.0388432							0.219542	0.276135	0.0350307	0.113773							0.108634	0.24675	0.0747917
0.153463	0.198357	0.209252	0.0728799	0.180439								0.158906	0.141131	0.64191	0.173036							0.0675985	0.186467	0.0576106	0.0907348							0.0625325	0.0437916	0.0921185	0.0850821							0.0552962	0.177428	0.105572
0.0641836	0.19411	0.0612457	0.137338	0.0975753								0.227198	0.0681832	0.214695	0.242177							0.109186	0.322931	0.109085	0.0907386							0.167283	0.32973	0.0766083	0.18861							0.0451043	0.110734	0.123888
0.08106	0.14639	0.0656945	0.0681337	0.163932								0.122304	0.144308	0.145662	0.0725699							0.184311	0.0365079	0.0758605	0.313484							0.160632	0.117046	0.160506	0.0499858							0.15537	0.0904936	0.1206
0.192527	0.285917	0.112612	0.0486058	0.149929								0.112177	0.228309	0.0693886	0.0780776							0.25617	0.0743668	0.167851	0.145952							0.204167	0.115613	0.0699084	0.168109							0.0147412	0.179116	0.106326
0.0824087	0.0496266	0.0972367	0.101869	0.100018								0.154906	0.094523	0.166937	0.164012							0.118856	0.0655688	0.0574735	0.145003							0.00517768	0.0406956	0.17404	0.371974							0.0988519	0.115992	0.376644
0.0415387	0.0195688	0.0471041	0.0598875	0.240466								0.106029	0.0908887	0.0849364	0.158556							0.347498	0.0692964	0.0326307	0.182762							0.080974	0.19395	0.316026	0.262278							0.133184	0.166469	0.0908642
0.174058	0.122777	0.0596417	0.22752	0.32369								0.066083	0.0836356	0.085769	0.0356553							0.119335	0.0550058	0.0425484	0.27348							0.0657763	0.108374	0.146681	0.278159							0.0971957	0.0596721	0.108183
0.159866	0.115288	0.950469	0.597723	0.11776								0.152792	0.247266	0.337352	0.250869							0.233294	0.0197801	0.0171631	0.2692							0.0550347	0.0450614	0.0734911	0.283668							0.0591582	0.144778	0.140494
0.144344	0.0465916	0.0558357	0.141	0.200178								0.0974589	0.173946	0.0985578	0.199742							0.0951142	0.0236907	0.0278673	0.230793							0.0568502	0.109022	0.0873792	0.293106							0.0788048	0.306306	0.208117
0.197935	0.17847	0.12857	0.216968	0.0675724								0.0562794	0.231506	0.182595	0.813693							0.154346	0.440925	0.119944	0.0609987							0.0558831	0.0766351	0.0819158	0.344429							0.133318	0.0244492	0.254978
0.102737	0.120254	0.114784	0.224536	0.0543866								0.145764	0.212815	0.136432	0.229157							0.294447	0.0313802	0.244437	0.0183351							0.12798	0.110846	0.197957	0.242593							0.101445	0.279139	0.205405
0.0483404	0.163082	0.167454	0.0554707	0.25073								0.0818018	0.388642	0.162876	0.0758665							0.0643508	0.190995	0.0983811	0.0242162							0.237507	0.101887	0.0851066	0.0299385							0.0330918	0.254773	0.216536
0.0388888	0.135713	0.0325485	0.332827	0.171765								0.0638801	0.294006	0.405764	0.257536							0.127012	0.275222	0.184119	0.278687							0.286689	0.180438	0.202222	0.199638							0.0454409	0.418943	0.149175
0.40537	0.0220208	0.256737	0.194971	0.167341								0.0518213	0.200827	0.276632	0.155815							0.215495	0.119484	0.0419525	0.143024							0.0271562	0.0212827	0.370987	0.210609							0.201553	0.0851802	0.0953098
0.00069043	0.106572	0.155142	0.18359	0.157371								0.0743982	0.345124	0.216492	0.0706854							0.11333	0.0992284	0.133985	0.101004							0.157656	0.294758	0.121671	0.051275							0.130752	0.147968	0.098179
0.713876	0.146456	0.246008	0.210544	0.317072								0.0314118	0.250155	0.120896	0.0319313							0.28538	0.0870575	0.253806	0.134794							0.220003	0.0437734	0.36955	0.0676755							0.0792576	0.291371	0.0444436
0.168048	0.194559	0.0686038	0.217281	0.18355								0.163068	0.203026	0.172773	0.128315							0.136554	0.164528	0.0857778	0.128963							0.178967	0.0948608	0.202411	0.394367							0.0824091	0.108723	0.274053
0.0850112	0.237608	0.266637	0.0939958	0.0477764								0.0922022	0.195347	0.131025	0.0272569							0.146868	0.160465	0.267737	0.194633							0.428031	0.174832	0.115053	0.171003							0.205274	0.0957499	0.315209
0.0464879	0.0576845	0.200922	0.0345926	0.155924								0.1228	0.0666494	0.263572	0.154006							0.0450174	0.105343	0.369997	0.221621							0.159765	0.254064	0.0727428	0.181522							0.183981	0.138382	0.0661162
0.158806	0.0844515	0.165514	0.119134	0.173983								0.223788	0.15583	0.327898	0.72494							0.100256	0.131789	0.134011	0.0903898							0.0687037	0.166168	0.214207	0.283977							0.089391	0.180748	0.0654316
0.370985	0.135844	0.458063	0.198544	0.289396								0.098247	0.161954	0.181325	0.164304							0.0741372	0.14662	0.0433799	0.137797							0.0524671	0.155248	0.0916933	0.0660064							0.147422	0.0921101	0.107387
0.0314608	0.123125	0.214464	0.316678	0.188595								0.243878	0.0433797	0.197037	0.15982							0.25931	0.107129	0.0864865	0.219963							0.117645	0.137939	0.0752574	0.158479							0.0354107	0.13323	0.0807202
0.319691	0.313054	0.112656	0.0345394	0.433474								0.0850425	0.18375	0.409475	0.155335							0.135844	0.168325	0.130349	0.20785							0.425536	0.184163	0.164186	0.189808							0.139808	0.076334	0.0907251
0.176325	0.229316	0.281792	0.254773	0.0899935								0.969427	0.184754	0.226344	0.166139							0.104774	0.0585034	0.224361	0.180342							0.0625756	0.146074	0.178799	0.357786							0.092796	0.0417048	0.0641136
0.0953907	0.0969701	0.291802	0.166923	0.0440223								0.114847	0.0652684	0.115058	0.134643							0.21125	0.029829	0.183988	0.144402							0.213503	0.217648	0.0815057	0.111555							0.0507488	0.0200128	0.0409048
0.0563479	0.101663	0.188992	0.235229	0.144333								0.275418	0.134834	0.282025	0.0597287							0.0993807	0.0439561	0.2101	0.310146							0.11234	0.167529	0.0441389	0.205332							0.107327	0.0905746	0.127452
0.200451	0.214387	0.176437	0.205626	0.140273								0.129525	0.226028	0.271576	0.211915							0.0929419	0.711433	0.161045	0.037373							0.215027	0.0643695	0.0799331	0.272197							0.0745468	0.0896935	0.130279
0.147176	0.0402285	0.104148	0.239194	0.177524								0.0517441	0.148775	0.200057	0.0911564							0.165202	0.250552	0.210444	0.0516986							0.122064	0.00710554	0.0876449	0.0614765							0.266708	0.0100486	0.0477507
0.272947	0.154261	0.1495	0.178314	0.0368015								0.15136	0.177401	0.119065	0.274964							0.253432	0.254777	0.176455	0.3546							0.0488137	0.233214	0.0928295	0.302518							0.0490922	0.0456587	0.0713644
0.278071	0.076016	0.139123	0.0159763	0.188963								0.053286	0.141562	0.011799	0.0249024							0.153677	0.186503	0.113714	0.330936							0.09788	0.16026	0.0609193	0.0853626							0.0866365	0.0342525	0.144884
0.0445116	0.364195	0.128816	0.0384882	0.0852726								0.116457	0.0937723	0.0997668	0.400523							0.160867	0.0533546	0.0400974	0.273355							0.0845128	0.186476	0.129684	0.124429							0.116679	0.0357261	0.132639
0.166412	0.169183	0.232476	0.141078	0.475023								0.0286767	0.0576476	0.242161	0.208085							0.0444206	0.093371	0.141195	0.2509							0.196473	0.126742	0.0411991	0.0055689							0.153309	0.0703236	0.310295
0.105239	0.103822	0.226923	0.0599263	0.171108								0.116868	0.110277	0.273199	0.178526							0.0675688	0.181384	0.104559	0.0751182							0.101395	0.25471	0.0702947	0.0799054							0.0573954	0.143028	0.0686049
0.0485042	0.197947	0.0946906	0.0821817	0.129789								0.118053	0.0814363	0.371926	0.0579005							0.143371	0.125936	0.175575	0.167235							0.130498	0.00693428	0.0274886	0.0680821							0.117831	0.136056	0.104861
0.0232886	0.160019	0.257089	0.141165	0.0891023								0.100662	0.100085	0.225164	0.285061							0.0718809	0.193112	0.124971	0.282571							0.10701	0.127906	0.132449	0.0448026							0.139171	0.0973284	0.0615724
0.120903	0.101315	0.160976	0.18028	0.127408								0.0874343	0.118522	0.300113	0.165867							0.189023	0.19177	0.155197	0.25759							0.0680201	0.0560014	0.0361768	0.0538964							0.274573	0.139491	0.0944814
0.187598	0.122636	0.140129	0.190394	0.0766693								0.164579	0.15665	0.00923089	0.155532							0.187396	0.102166	0.247024	0.0794653							0.172932	0.128727	0.16072	0.0352966							0.153688	0.0898821	0.162795
0.196103	0.327661	0.0987127	0.195145	0.290549								0.22401	0.142313	0.193679	0.136516							0.142686	0.342289	0.092932	0.0744984							0.0919977	0.10277	0.154136	0.0675809							0.116671	0.205343	0.079692
0.168224	0.0644852	0.207456	0.168932	0.483675								0.040772	0.238341	0.20832	0.181966							0.100215	0.25294	0.0291172	0.185992							0.0503536	0.234747	0.126214	0.0816923							0.0954779	0.259528	0.10584
0.163762	0.157238	0.087931	0.0580849	0.199602								0.184188	0.141761	0.188181	0.334351							0.0979379	0.23236	0.130867	0.207619							0.0870324	0.100009	0.256424	0.187175							0.0700045	0.260307	0.184992
0.0577179	0.0839058	0.0928504	0.12208	0.113131								0.219218	0.369479	0.0361329	0.492676							0.179217	0.120941	0.0405297	0.167917							0.0543529	0.0325811	0.118688	0.158075							0.171613	0.033581	0.106705
0.0798639	0.157793	0.130379	0.0744459	0.141653								0.204901	0.180385	0.347764	0.130448							0.279795	0.111962	0.152335	0.146124							0.224001	0.156769	0.0591349	0.100275							0.0926436	0.0606773	0.0709881
0.108553	0.0908715	0.204476	0.22423	0.247459								0.231184	0.217741	0.185535	0.0554007							0.303079	0.112305	0.187523	0.15953							0.0811909	0.216279	0.0422524	0.146886							0.0359474	0.0643492	0.0929687
0.113592	0.265651	0.0532924	0.144261	0.0770599								0.110902	0.240758	0.138546	0.111323							0.272549	0.18	0.114254	0.0532185							0.0408765	0.0846871	0.151134	0.024938							0.161729	0.0843814	0.163419
0.201191	0.107181	0.287692	0.119282	0.0277188								0.359218	0.0985206	0.377729	0.180721							0.867621	0.123283	0.180405	0.11158							0.166864	0.176079	0.104556	0.0564184							0.0748713	0.0672069	0.107625
0.318342	0.149188	0.097911	0.257115	0.151324								0.0963243	0.190423	0.0148012	0.11981							0.0543223	0.224277	0.140716	0.567577							0.231502	0.0502618	0.171791	0.100387							0.0242191	0.0636383	0.113806
0.160799	0.14699	0.209217	0.202619	0.158807								0.086773	0.0793944	0.249835	0.13708							0.00772131	0.136169	0.140227	0.0419354							0.0819913	0.175073	0.0863903	0.168668							0.251498	0.0748087	0.0204102
0.0789584	0.088459	0.14739	0.116415	0.20779								0.0979359	0.103178	0.22983	0.0502995							0.0977248	0.0907526	0.140471	0.207343							0.0727984	0.0764897	0.211718	0.125421							0.0412907	0.0560732	0.239209
0.0609213	0.190663	0.16704	0.103361	0.0611065								0.033123	0.275058	0.354647	0.147793							0.164068	0.0324691	0.12288	0.0682303							0.191602	0.16159	0.118391	0.159312							0.115179	0.0835829	0.2197
0.0512073	0.164982	0.170966	0.0796359	0.140928								0.21822	0.0932728	0.191959	0.222046							0.120487	0.0252446	0.0908593	0.154101							0.191948	0.223828	0.200207	0.106478							0.113336	0.0788875	0.111024
0.139997	0.107486	0.0522276	0.281873	0.118531								0.229865	0.18731	0.213985	0.191859							0.0850436	0.0669061	0.198899	0.0495858							0.0997477	0.080925	0.163375	0.0477093							0.126663	0.0209448	0.0424048
0.167514	0.213489	0.0760949	0.19818	0.416035								0.106455	0.103443	0.112875	0.0475014							0.0557326	0.0744654	0.412148	0.128107							0.232088	0.0287802	0.109792	0.224496							0.0930232	0.184923	0.145177
0.14772	0.237382	0.0974801	0.165765	0.176141								0.194863	0.0433234	0.271022	0.0679735							0.151486	0.0371561	0.248461	0.158934							0.134855	0.0120809	0.141641	0.127388							0.0414624	0.155829	0.0177681
0.0213472	0.00987708	0.103684	0.0470468	0.197376								0.431636	0.030782	0.199718	0.121416							0.0296598	0.121538	0.0849901	0.0248744							0.0367151	0.0761562	0.100664	0.251633							0.0356208	0.00755872	0.0972187
0.136912	0.415492	0.162577	0.0814287	0.0279045								0.0259466	0.141428	0.204314	0.0889949							0.036668	0.174181	0.386111	0.134456							0.0324364	0.166267	0.245682	0.192872							0.0185436	0.135587	0.194098
0.060129	0.072043	0.25647	0.128459	1.07997								0.200948	0.254082	0.133128	0.0140487							0.053602	0.124076	0.205598	0.134345							0.280449	0.0249246	0.13064	0.0803907							0.0603101	0.024752	0.141824
0.0741533	0.133181	0.0489427	0.0603641	0.198274								0.116429	1.01979	0.306587	0.0751499							0.0530097	0.0479975	0.370881	0.0715146							0.0890533	0.113215	0.0645063	0.0459317							0.12397	0.0865164	0.0756362
0.192334	0.101014	0.0749982	0.0886979	0.0513421								0.205542	0.0847179	0.111207	0.0549675							0.0058656	0.0841886	0.194499	0.101345							0.325854	0.0299626	0.324081	0.174013							0.0444818	0.0709599	0.0694213
0.132313	0.0359506	0.151381	0.201995	0.248076								0.0571075	0.381358	0.124797	0.184777							0.0647093	0.211939	0.0871129	0.266532							0.166903	0.0543112	0.440525	0.259157							0.110989	0.0540494	0.0717961
0.212961	0.310562	0.492739	0.378938	0.157913								0.257649	0.139039	0.110095	0.155501							0.0577349	0.191457	0.0744652	0.157936							0.127872	0.0937	0.0637989	0.0848644							0.067685	0.165515	0.0256181
0.0718431	0.132742	0.284873	0.172001	0.107036								0.322774	0.0631118	0.0959202	0.192155							0.0181829	0.121795	0.18724	0.0922267							0.0699056	0.238835	0.106092	0.0574502							0.169716	0.36395	0.0845102
0.100072	0.0397082	0.181419	0.081268	0.364448								0.24486	0.169619	0.0200807	0.174926							0.162439	0.187102	0.152292	0.111934							0.0874529	0.0682533	0.0610848	0.137561							0.0886754	0.0739036	0.0619551
0.394161	0.04914	0.262209	0.46855	0.123031								0.18872	0.118077	0.1068	0.168051							0.185355	0.0467687	0.115805	0.0822262							0.161732	0.111785	0.379875	0.163259							0.0743955	0.143613	0.119532
0.191627	0.0641711	0.206562	0.0457792	0.0614968								0.315395	0.17568	0.0892	0.0973809							0.24185	0.103405	0.0273882	0.326393							0.0867727	0.0467238	0.0974496	0.256699							0.12679	0.0245775	0.0812415
0.186447	0.103682	0.191104	0.0734741	0.22842								0.239985	0.284442	0.167608	0.231037							0.0767047	0.0347627	0.228769	0.329963							0.0773202	0.104308	0.300844	0.204187							0.16374	0.0358252	0.165906
0.214825	0.11442	0.125059	0.215061	0.283767								0.175337	0.0989956	0.157944	0.102314							0.169535	0.094119	0.0349837	0.0534833							0.0688563	0.0368632	0.203776	0.227754							0.140403	0.0955686	0.105887
0.0177838	0.136001	0.0806678	0.235737	0.114955								0.269207	0.280049	0.326293	0.20936							0.210108	0.117226	0.270874	0.233031							0.226492	0.117078	0.108532	0.0685863							0.0980515	0.0741701	0.133891
0.131578	0.130345	0.161747	0.0775535	0.143505								0.0576318	0.141823	0.324606	0.0334227							0.334416	0.12293	0.164744	0.0512542							0.0663499	0.284301	0.0955034	0.130579							0.323568	0.0616204	0.0535013
0.193886	0.111156	0.110886	0.217198	0.316333								0.206193	0.150812	0.240232	0.0937334							0.245894	0.264339	0.028763	0.0041117							0.149575	0.135589	0.116532	0.319457							0.26382	0.050852	0.280592
0.101551	0.148216	0.102898	0.186486	0.347602								0.0528968	0.331596	0.113888	0.0589313							0.102549	0.0929224	0.170708	0.167923							0.0537204	0.0470401	0.256047	0.174632							0.148391	0.184763	0.0807603
0.253572	0.224421	0.249238	0.247393	0.442782								0.2975	0.219056	0.035614	0.128955							0.179224	0.239637	0.193976	0.215369							0.0220386	0.113375	0.0375538	0.151206							0.0911222	0.00407306	0.0186377
0.176727	0.141249	0.0424448	0.127569	0.130412								0.267238	0.0290742	0.145956	0.221631							0.117081	0.044693	0.0145188	0.24885							0.174616	0.083218	1.03516	0.0542925							0.2424	0.0756684	0.139492
0.0941554	0.0427758	0.106643	0.214565	0.100397								0.297851	0.159707	0.098448	0.0934408							0.0846355	0.155274	0.184972	0.1736							0.0561372	0.143933	0.774213	0.0869735							0.136265	0.111944	0.0880927
0.177178	0.213526	0.118082	0.104452	0.106812								0.0172913	0.359599	0.190353	0.22815							0.139599	0.179919	0.143835	0.0929027							0.0711005	0.0445302	0.110876	0.248368							0.00609674	0.268931	0.0711674
0.199488	0.220565	0.148609	0.168074	0.307493								0.103042	0.337626	0.297287	0.0371523							0.13315	0.108335	0.70418	0.213307							0.0582907	0.0888685	0.141996	0.116062							0.053934	0.288116	0.183171
0.173606	0.118327	0.122067	0.144186	0.122438								0.209214	0.0525851	0.0463912	0.293649							0.199573	0.181189	0.121767	0.111779							0.0225123	0.0528136	0.153468	0.155795							0.0364672	0.108344	0.0749415
0.0369578	0.0750463	0.240085	0.0576211	0.274346								0.127672	0.0540693	0.0973014	0.870852							0.16735	0.107042	0.139465	0.0408012							0.0387952	0.179594	0.332816	0.190874							0.0812544	0.0753143	0.0998441
0.203931	0.0987755	0.192781	0.279082	0.128524								0.122024	0.186139	0.142957	0.244194							0.205409	0.142729	0.177315	0.172484							0.334382	0.24803	0.0257352	0.0919268							0.147221	0.107223	0.0486577
0.220754	0.187555	0.10669	0.0444331	0.118807								0.0550563	0.186726	0.210042	0.0540557							0.293858	0.181259	0.0483041	0.219588							0.149933	0.273464	0.0161548	0.0165705							0.195742	0.0309877	0.0407585
0.136575	0.10924	0.0734737	0.308381	0.234516								0.108053	0.111948	0.176993	0.107095							0.0845331	0.102335	0.0917146	0.0594692							0.0468455	0.373483	0.0707918	0.0620532							0.0869266	0.161497	0.124309
0.187268	0.21495	0.318441	0.126998	0.0758334								0.469568	0.236105	0.0962901	0.254727							0.258629	0.264348	0.130664	0.0863143							0.257191	0.113719	0.0688634	0.0374332							0.0635177	0.172891	0.304276
0.181767	0.0913423	0.0770552	0.0992399	0.19664								0.127066	0.074555	0.0162098	0.0680823							0.101654	0.124154	0.107193	0.0985231							0.227402	0.0979682	0.0406602	0.136982							0.0628088	0.0523943	0.0939378
0.192634	0.185876	0.137833	0.230934	0.589679								0.174489	0.139369	0.189534	0.110041							0.422848	0.117114	0.128678	0.0471819							0.0486294	0.166455	0.1636	0.210037							0.0611822	0.0886878	0.0401932
0.111343	0.132254	0.0260545	0.19965	0.124369								0.143404	0.163414	0.0659853	0.209298							0.262254	0.0937986	0.267122	0.449							0.243854	0.0330537	0.183006	0.205571							0.078179	0.0961096	0.0496128
0.0975704	0.0468019	0.195452	0.0456035	0.0665582								0.112832	0.093356	0.152577	0.18099							0.321958	0.254894	0.0351912	0.11828							0.285296	0.095119	0.183658	0.0764307							0.125091	0.0960671	0.237998
0.140748	0.527218	0.1028	0.478738	0.211045								0.100295	0.179782	0.25594	0.0947888							0.167896	0.0267378	0.145896	0.0958806							0.142083	0.225793	0.0656475	0.0980608							0.0358901	0.0757434	0.0305845
0.127839	0.11821	0.22475	0.323806	0.176061								0.0889547	0.0415583	0.0869438	0.233991							0.25401	0.198605	0.0187111	0.386669							0.165913	0.401155	0.0481666	0.0616413							0.0587211	0.0737899	0.0992362
0.175491	0.350968	0.104882	0.1192	0.0563769								0.0537546	0.0425324	0.0943021	0.0990659							0.266716	0.0250936	0.0782489	0.315574							0.245472	0.275319	0.054344	0.0246146							0.0877032	0.0891628	0.172128
0.0923028	0.187639	0.0467183	0.480346	0.132152								0.0364516	0.178293	0.0186281	0.155297							0.158593	0.0825045	0.144722	0.161822							0.0734699	0.0904494	0.0387667	0.0307399							0.0338402	0.0736128	0.0888921
0.168383	0.219907	0.0685066	0.0454653	0.0689837								0.256744	0.221492	0.0127742	0.0358643							0.115884	0.171094	0.061131	0.138166							0.134468	0.174772	0.0678378	0.0792409							0.0684793	0.0749854	0.121735
0.186248	0.0554796	0.0646183	0.140323	0.374271								0.255954	0.459233	0.130767	0.18342							0.0627093	0.213117	0.311111	0.0486453							0.0965597	0.118708	0.0858515	0.0268073							0.137709	0.134981	0.0887737
0.0816581	0.15735	0.0709252	0.141098	0.0847215								0.219785	0.0955535	0.139453	0.0690983							0.0919829	0.365714	0.18289	0.0404601							0.085677	0.0456382	0.104699	0.0541823							0.111721	0.113745	0.135108
0.14293	0.137377	0.14465	0.129004	0.121913								0.0834734	0.129512	0.130236	0.367244							0.184151	0.22771	0.268186	0.110513							0.0706411	0.279456	0.137933	0.0358544							0.0458119	0.112081	0.168384
0.146828	0.259204	0.167629	0.130593	0.11346								0.30523	0.0361736	0.962161	0.346715							0.0535036	0.175936	0.252394	0.145181							0.0989536	0.205445	0.170198	0.0466029							0.101655	0.104103	0.23535
0.216166	0.109012	0.263878	0.326067	0.0806524								0.269584	0.0402478	0.217344	0.182094							0.204713	0.206898	0.10969	0.066328							0.0660813	0.331098	0.0454417	0.0304459							0.0963959	0.32736	0.05238
0.0611158	0.228015	0.140345	0.0745623	0.0440368								0.292198	0.119211	0.0860496	0.279051							0.112349	0.134095	0.245561	0.116269							0.0311869	0.0246534	0.0611755	0.0886642							0.0721134	0.0983111	0.0191606
0.114617	0.11321	0.0945089	0.076059	0.124964								0.107182	0.11674	0.19281	0.117504							0.0930851	0.0202023	0.166973	0.0482826							0.114226	0.317869	0.166467	0.039059							0.0635715	0.0406899	0.0543968
0.282243	0.164896	0.189649	0.110094	0.100224								0.0991822	0.13041	0.0773837	0.0977416							0.185924	0.048814	0.222763	0.132851							0.126985	0.158841	0.0674954	0.106972							0.0620041	0.073738	0.101242
0.3214	0.192067	0.357522	0.0794578	0.177537								0.00636125	0.0789542	0.208997	0.190922							0.170002	0.0560749	0.226487	0.0831501							0.0703151	0.251268	0.159029	0.0633752							0.147944	0.189885	0.133462
0.166556	0.0735731	0.678794	0.278089	0.242718								0.0619987	0.164726	0.0736275	0.112568							0.0446461	0.0639442	0.0371066	0.105931							0.00755161	0.107573	0.129868	0.142749							0.114646	0.0882039	0.279589
0.259625	0.303206	0.0556184	0.156301	0.237011								0.169966	0.0317717	0.231291	0.299592							0.0270693	0.101849	0.077816	0.0949014							0.0491887	0.0970341	0.135497	0.0394607							0.100278	0.221801	0.171608
0.0707295	0.155754	0.100931	0.0421286	0.899908								0.0831061	0.121422	0.162534	0.254335							0.0987285	0.111136	0.127969	0.182862							0.165788	0.0271511	0.143682	0.0791834							0.108999	0.0535996	0.0711688
0.238675	0.237284	0.19845	0.0818639	0.0956037								0.0489604	0.0300407	0.146282	0.0385771							0.15578	0.0963543	0.0220766	0.0666798							0.035771	0.0997427	0.198142	0.10497							0.326971	0.0683798	0.15142
0.128949	0.315501	0.041875	0.10716	0.0209538								0.287007	0.225815	0.113425	0.201997							0.129915	0.119984	0.0342343	0.103044							0.0731276	0.10332	0.149137	0.270728							0.139091	0.0932845	0.274409
0.0257636	0.0813909	0.206106	0.136257	0.211646								0.149289	0.0973771	0.18851	0.150849							0.141286	0.316456	0.0581867	0.168498							0.0835503	0.164638	0.0400021	0.0683801							0.0324461	0.20952	0.338886
0.0166888	0.274666	1.08763	0.144291	0.235889								0.460127	0.143105	0.400171	0.127914							0.115	0.121337	0.0631672	0.097256							0.126199	0.127269	0.243836	0.259939							0.126964	0.178987	0.0781804
0.0969767	0.127926	0.164013	0.0874561	0.451836								0.23369	0.202745	0.244367	0.0411423							0.0960613	0.0275769	0.267084	0.104975							0.0119916	0.121579	0.244972	0.080652							0.124697	0.0776238	0.150568
0.0163409	0.180074	0.328305	0.265558	0.172907								0.0848717	0.20841	0.300978	0.182175							0.115176	0.106557	0.335959	0.0419525							0.112052	0.193042	0.0853031	0.0559851							0.0675501	0.130562	0.0757947
0.169466	0.152403	0.106742	0.315188	0.102787								0.130063	0.175065	0.17934	0.0848379							0.183306	0.049579	0.198552	0.0940968							0.121799	0.0916142	0.286542	0.0848132							0.0919883	0.07521	0.00625482
0.0401857	0.13341	0.209772	0.196598	0.0647772								0.459626	0.045283	0.228045	0.0760886							0.342493	0.0597422	0.167235	0.0442459							0.0715911	0.207497	0.0721656	0.0656599							0.188293	0.121826	0.0331943
0.16814	0.101418	0.105916	0.196017	0.025615								0.250175	0.262001	0.132251	0.0979324							0.317812	0.0720168	0.338321	0.334306							0.229677	0.0964173	0.0674699	0.237828							0.100948	0.202939	0.0202565
0.179704	0.0837348	0.204801	0.0810034	0.0958088								0.242855	0.186474	0.0598411	0.198878							0.0346233	0.0615841	0.329477	0.10611							0.117004	0.182561	0.0721858	0.0831222							0.0353859	0.15733	0.0396578
0.123186	0.0715091	0.100179	0.264257	0.0359944								0.299834	0.145018	0.169708	0.430957							0.0975211	0.138511	0.229773	0.120813							0.0407173	0.0986136	0.0662491	0.213951							0.139964	0.044724	0.261076
0.302116	0.0719077	0.213036	0.0671913	0.151518								0.323012	0.101328	0.189192	0.302733							0.0884609	0.00899259	0.184426	0.170361							0.295536	0.244723	0.0456058	0.210284							0.206069	0.137798	0.129049
0.0596167	0.255046	0.123444	0.789737	0.152292								0.113798	0.296213	0.103714	0.187253							0.119248	0.0594153	0.0876808	0.0904366							0.0658524	0.092417	0.0898369	0.197733							0.0639189	0.163211	0.291983
0.857131	0.316944	0.18111	0.0631857	0.15633								0.093023	0.267684	0.120566	0.215558							0.135245	0.0720024	0.0539686	0.243226							0.184019	0.168267	0.120687	0.137238							0.117882	0.476084	0.165773
0.231125	0.135218	0.332266	0.0465926	0.496032								0.165417	0.105466	0.100512	0.063718							0.102198	0.131468	0.0547771	0.11163							0.233302	0.248471	0.101911	0.228567							0.189073	0.0301736	0.198841
0.143965	0.110269	0.110148	0.187203	0.488335								0.199436	0.0809677	0.119111	0.0821034							0.115203	0.129545	0.172149	0.0433816							0.130042	0.249476	0.210655	0.0336823							0.0532273	0.0465759	0.056158
0.253129	0.263464	0.264011	0.283811	0.125118								0.133687	0.297318	0.0427341	0.218864							0.0641311	0.0214624	0.0703905	0.156679							0.103052	0.0932815	0.0434132	0.144275							0.196806	0.127343	0.0927462
0.0889358	0.227485	0.117213	0.143179	1.08187								0.111862	0.107308	0.293146	0.154604							0.0968812	0.0940725	0.1032	0.241825							0.0715106	0.071456	0.0996007	0.278575							0.107972	0.0614692	0.128653
0.0458148	0.176278	0.17687	0.363936	0.241835								0.126231	0.194719	0.235235	0.218276							0.299605	0.0889631	0.0758466	0.0752376							0.123127	0.266623	0.134571	0.0760585							0.19178	0.0977328	0.149533
0.190701	0.454984	0.184727	0.218876	0.0590566								0.121105	0.0732418	0.0682779	0.470448							0.259136	0.00684386	0.234645	0.220479							0.069378	0.318122	0.267542	0.0255034							0.139189	0.0559683	0.0565316
0.212948	0.166234	0.442863	0.133407	0.0549759								0.223359	0.223035	0.0638759	0.143104							0.0969636	0.185033	0.159115	0.0604296							0.211998	0.0748914	0.131283	0.260292							0.0694987	0.102146	0.119877
0.0581808	0.205601	0.0650643	0.198979	0.0717952								0.248202	0.0269877	0.121976	0.0704228							0.0943725	0.159693	0.23867	0.165894							0.0284289	0.0302145	0.172912	0.0560111							0.0927865	0.115701	0.0305834
0.133142	0.180113	0.112634	0.140399	0.204228								0.0868591	0.210905	0.147195	0.228579							0.415336	0.290684	0.118107	0.202586							0.106206	0.128183	0.263684	0.0207974							0.0309745	0.0455565	0.103956
0.220501	1.0543	0.278026	0.0642592	0.365783								0.0586104	0.168573	0.0952727	0.0614297							0.0445396	0.00530043	0.0130149	0.0874691							0.0457234	0.237844	0.104847	0.0751253							0.250938	0.0593833	0.0343022
0.0998102	0.146215	0.0235364	0.0238421	0.348552								0.629779	0.0490868	0.25946	0.0560082							0.0985985	0.151611	0.190813	0.271084							0.0734024	0.211984	0.0461913	0.0946791							0.255273	0.245029	0.10264
0.171382	0.199931	0.110215	0.249402	0.253257								0.0885077	0.146491	0.0594959	0.0530204							0.113659	0.258869	0.0966074	0.0436192							0.206019	0.161884	0.0492828	0.0243042							0.122502	0.660398	0.038352
0.148886	0.190714	0.169548	0.0679891	0.211534								0.149918	0.0607234	0.117773	0.170999							0.0318046	0.0432644	0.109095	0.150891							0.0729891	0.157564	0.13318	0.0417188							0.186756	0.0879047	0.0644427
0.139405	0.0753354	0.107162	0.113871	0.121972								0.0481584	0.542207	0.241393	0.177022							0.0288632	0.0835725	0.201394	0.220223							0.0768346	0.938698	0.0770535	0.0297005							0.124202	0.0304495	0.0771327
0.563042	0.0704568	0.355085	0.444859	0.214095								0.166185	0.0308012	0.12388	0.0740423							0.0334457	0.225398	0.293346	0.123349							0.170531	0.303677	0.0255161	0.0522561							0.0725313	0.0247388	0.133594
0.0585048	0.158061	0.103066	0.228448	0.0474028								0.123095	0.139489	0.0804987	0.203543							0.12415	0.0923941	0.00955614	0.254616							0.0590563	0.0652131	0.190903	0.0533259							0.0778054	0.0243707	0.154245
0.152765	0.0452875	0.156927	0.205671	0.050073								0.124129	0.150472	0.1106	0.170075							0.0632611	0.791205	0.0735988	0.141088							0.119436	0.116283	0.180368	0.0495006							0.0497594	0.149231	0.125899
0.0699695	0.0376592	0.209961	0.330501	0.0283867								0.9239	0.0436195	0.368864	0.346568							0.0797307	0.0581332	0.174268	0.180986							0.0934371	0.115012	0.230345	0.420981							0.085501	0.0575334	0.0716371
0.315126	0.109519	0.231313	0.245798	0.101172								0.22169	0.200006	0.171384	0.0333379							0.103262	0.0767204	0.048675	0.326206							0.0905272	0.0242664	0.129125	0.163654							0.0907225	0.440072	0.092329
0.238226	0.0582146	0.174099	0.139522	0.168865								0.135233	0.205804	0.306864	0.0228431							0.0632399	0.0241952	0.238815	0.127995							0.100407	0.0731343	0.0912289	0.334054							0.0450131	0.0550353	0.059762
0.239352	0.081739	0.311614	0.325798	0.0444217								0.144656	0.328338	0.16839	0.174244							0.199701	0.046323	0.132624	0.288465							0.0735555	0.0797278	0.0127524	0.108299							0.0794581	0.0169942	0.0686537
0.0864354	0.189054	0.215324	0.324501	0.324458								0.0549437	0.1295	0.83962	0.189895							0.0990059	0.0981021	0.200444	0.0880436							0.134277	0.0643147	0.072399	0.206374							0.366496	0.0422214	0.048455
0.218202	0.172149	0.308201	0.0616957	0.21839								0.0910375	0.310392	0.0542863	0.084332							0.0787187	0.0540522	0.037419	0.0198188							0.118056	0.158608	0.113406	0.174686							0.0789946	0.506809	0.0374401
0.093037	0.132518	0.0447384	0.0516803	0.287978								0.274195	0.1436	0.0766152	0.257034							0.166774	0.0589346	0.0794709	0.0264636							0.180842	0.227681	0.261897	0.291029							0.189022	0.162276	0.0471185
0.119138	0.134237	0.129493	0.178905	0.231807								0.137542	0.186966	0.0190919	0.0745604							0.550858	0.0393524	0.164364	0.0508145							0.0910805	0.167905	0.144209	0.165238							0.084156	0.0807111	0.0413336
0.116184	0.173459	0.239078	0.133078	0.194308								0.115481	0.0602807	0.25605	0.161506							0.225292	0.0789785	0.0964884	0.105587							0.0979509	0.0946127	0.256979	0.0511232							0.0282847	0.101369	0.116966
0.178171	0.104401	0.258279	0.0582022	0.201361								0.234781	0.146921	0.0946827	0.225523							0.183673	0.0222884	0.0270492	0.165498							0.0415923	0.166794	0.263714	0.0857524							0.364696	0.0963598	0.0491364
0.053235	0.161284	0.229172	0.0672814	0.168175								0.0834801	0.095758	0.0621981	0.0515077							0.272808	0.0786576	0.0601752	0.197748							0.209341	0.187338	0.0934521	0.146157							0.326488	0.800362	0.257747
0.352207	0.12417	0.230866	0.130736	0.19906								0.150085	0.10056	0.137781	0.0721962							0.345143	0.0981331	0.130909	0.132441							0.164294	0.184831	0.0882979	0.036787							0.0548916	0.0155056	0.0359193
0.121897	0.195044	0.131097	0.176327	0.106307								0.036007	0.194132	0.614859	0.0574628							0.130935	0.0735365	0.0867075	0.189736							0.0449184	0.239671	0.176111	0.0957217							0.0719342	0.0939055	0.041694
0.211015	0.103979	0.169658	0.224131	0.336819								0.215399	0.14146	0.191936	0.0469249							0.0840417	0.079834	0.150357	0.256256							0.285531	0.122496	0.0236579	0.0414697							0.0511961	0.0585984	0.122248
0.069166	0.158816	0.0718534	0.0936027	0.194125								0.121812	0.0875373	0.311878	0.0620052							0.0842806	0.266071	0.122075	0.272948							0.226562	0.27531	0.078228	0.0462466							0.0884506	0.0453795	0.0394146
0.134541	0.17185	0.123806	0.0176376	0.124131								0.195716	0.188585	0.186802	0.116026							0.143014	0.383583	0.0810986	0.104335							0.484386	0.194829	0.353005	0.0507428							0.102011	0.186901	0.19227
0.180012	0.180184	0.175157	0.137805	0.074005								0.31551	0.259579	0.115835	0.00703679							0.167481	0.195038	0.133252	0.240909							0.226199	0.118735	0.0877602	0.343584							0.142957	0.318464	0.104743
0.209351	0.069351	0.0966111	0.163526	0.032734								0.198088	0.283166	0.0939639	0.02093							0.174024	0.240006	0.100024	0.307358							0.112234	0.168112	0.0745051	0.127759							0.234864	0.0951681	0.0969083
0.173346	0.143503	0.062495	0.171581	0.110562								0.176416	0.235094	0.14964	0.0377361							0.115406	0.221681	0.131674	0.352126							0.0229062	0.16326	0.117668	0.0466219							0.0369905	0.054927	0.0968366
0.116631	0.120611	0.143688	0.126899	0.108717								0.0783877	0.373569	0.133038	0.142176							0.107074	0.227452	0.0349513	0.183988							0.151715	0.0942819	0.173373	0.0145769							0.0347371	0.132177	0.0998001
0.3659	0.0657045	0.0668339	0.117188	0.154292								0.279945	0.110768	0.191553	0.0716122							0.177692	0.0632791	0.35069	0.122832							0.105513	0.0302401	0.25605	0.0187606							0.157305	0.252082	0.087665
0.16684	0.29302	0.0527673	0.174943	0.103245								0.171471	0.0189136	0.258898	0.181789							0.149378	0.0554729	0.383519	0.165144							0.00844911	0.0182242	0.0562723	0.00622182							0.129325	0.248471	0.0644668
0.222349	0.351822	0.146801	0.0630812	0.147883								0.153008	0.173071	0.186682	0.0411164							0.15199	0.110998	0.102614	0.176702							0.165563	0.197838	0.113359	0.0202222							0.096356	0.0607709	0.0725874
0.209222	0.41599	0.193398	0.117077	1.05412								0.187888	0.438534	0.198818	0.0600925							0.117505	0.120025	0.299779	0.105066							0.0220986	0.0221498	0.125946	0.111131							0.204593	0.131958	0.0928106
0.135416	0.197713	0.163069	0.178674	0.114124								0.283542	0.330325	0.276426	0.227156							0.230728	0.166952	0.2876	0.0718717							0.0966983	0.131528	0.0315937	0.10576							0.0877455	0.09822	0.0548601
0.246056	0.150963	0.0796495	0.181613	0.278326								0.223799	0.182402	0.104738	0.186507							0.0615732	0.0213578	0.186043	0.14169							0.347752	0.113657	0.0477998	0.32635							0.123592	0.233428	0.0418321
0.204357	0.169781	0.0558799	0.14516	0.0851966								0.106785	0.154842	0.0980936	0.11229							0.178154	0.203896	0.118353	0.209296							0.233807	0.103432	0.028283	0.320971							0.200801	0.102466	0.112229
0.0614723	0.279514	0.0260075	0.143518	0.175845								0.235796	0.130063	0.164078	1.06194							0.0875856	0.111642	0.108942	0.176304							0.110347	0.040897	0.0690506	0.113065							0.111267	0.0290147	0.775426
0.0395057	0.203585	0.157377	0.123962	0.0519558								0.178072	0.40158	0.194672	0.269227							0.099831	0.124663	0.0287765	0.0743612							0.883003	0.12616	0.04196	0.141234							0.0428953	0.0780921	0.0344746
0.0389564	0.195007	0.197956	0.134449	0.0924402								0.154257	0.119726	0.141262	0.305263							0.0350845	0.309122	0.0574547	0.0638403							0.0272675	0.101438	0.0785368	0.173601							0.0373654	0.82274	0.663856
0.174245	0.238471	0.087767	0.103143	0.139424								0.177836	0.162293	0.144165	0.331683							0.108546	0.326355	0.0518248	0.0827558							0.0304925	0.255167	0.45821	0.143139							0.159528	0.150329	0.109251
0.291754	0.102418	0.367465	0.291335	0.135261								1.01523	0.0616253	0.0382164	0.239571							0.131949	0.110558	0.0651036	0.0609059							0.21078	0.316855	0.118258	0.192098							0.252023	0.131984	0.120897
0.286669	0.124577	0.113965	0.250883	0.0315755								0.108305	0.159271	0.29609	0.0692439							0.0938679	0.207899	0.0200733	0.0916493							0.190549	0.161775	0.0739188	0.0579212							0.0982498	0.0437031	0.057731
0.036464	0.413914	0.147945	0.252676	0.152549								0.077716	0.289017	0.0970843	0.0226177							0.0489463	0.0135116	0.236161	0.196657							0.164807	0.115085	0.348299	0.181544							0.331856	0.16056	0.0502271
0.193712	0.115427	0.574217	0.0370945	0.156376								0.0875305	0.119793	0.193446	0.101825							0.0846599	0.142123	0.177152	0.0479984							0.0670272	0.243628	0.184021	0.133546							0.306873	0.771876	0.0514547
0.0543735	0.15742	0.278739	0.201262	0.162834								0.0666379	0.157805	0.144826	0.262165							0.0395535	0.391968	0.694403	0.211612							0.135715	0.0581681	0.0471823	0.0248991							0.237486	0.0491325	0.0706704
0.113324	0.223387	0.232934	0.144735	0.044473								0.234469	0.124443	0.095699	0.285647							0.106801	0.191278	0.143134	0.148975							0.0705312	0.259663	0.0749826	0.155049							0.0259295	0.225269	0.0405386
0.127255	0.0909553	0.590388	0.0177122	0.114091								0.272176	0.112924	0.164471	0.102726							0.241845	0.0166999	0.0878188	0.0563387							0.0392839	0.0501166	0.117078	0.0274145							0.0547605	0.244282	0.0962424
0.130911	0.160156	0.0764654	0.334274	0.138984								0.149502	0.0719328	0.135544	0.0252787							0.00907806	0.0655153	0.11928	0.0750968							0.187782	0.0909432	0.149694	0.024455							0.348265	0.0778312	0.127448
0.119185	0.0119559	0.198775	0.225718	0.208424								0.0804695	0.0441694	0.227281	0.300484							0.160434	0.193509	0.303765	0.20432							0.191325	0.0596135	0.0750291	0.0242249							0.0223781	0.0686599	0.0340323
0.15177	0.119666	0.0644233	0.0637338	0.204291								0.0425459	0.109193	0.346177	0.188177							0.0202332	0.539311	0.0448963	0.169104							0.080873	0.114898	0.0640448	0.11609							0.0902861	0.156452	0.117469
0.207393	0.197012	0.128768	0.100738	0.182099								0.136653	0.00402006	0.0921239	0.12649							0.305203	0.11267	0.384229	0.163333							0.236318	0.181206	0.247436	0.0623331							0.0703183	0.157726	0.0557859
0.195475	0.18968	0.078699	0.125103	0.0900991								0.294101	0.110536	0.160423	0.0507643							0.112196	0.126005	0.306714	0.313078							0.0831457	0.120434	0.252411	0.250033							0.206174	0.136692	0.0710671
0.111108	0.204716	0.134137	0.0252487	0.0842288								0.125293	0.150167	0.184971	0.183217							0.0291778	0.0839604	0.0729402	0.124997							0.139583	0.207635	0.0840912	0.1428							0.013442	0.142788	0.116956
0.0685969	0.102292	0.164828	0.175271	0.176205								0.131562	0.213827	0.114346	0.125632							0.0851474	0.0573131	0.150208	0.161163							0.209853	0.0973282	0.0861497	0.0985601							0.0614879	0.356266	0.879494
0.238034	0.180401	0.105977	0.172931	0.161124								0.279648	0.223488	0.215479	0.115944							0.0214225	0.0403341	0.0845462	0.123485							0.0312325	0.106532	0.0825136	0.0419893							0.186941	0.22023	0.074569
0.461735	0.192587	0.240657	0.502458	0.0741309								0.134033	0.156748	0.060768	0.198831							0.0708423	0.196384	0.179249	0.287892							0.0243281	0.0600257	0.240967	0.221863							0.218891	0.0770021	0.128141
0.142854	0.0447599	0.122424	0.119404	0.0686939								0.197915	0.168959	0.057346	0.156178							0.123625	0.0428315	0.0596872	0.205698							0.039648	0.065326	0.111299	0.073196							0.266727	0.0827207	0.147315
0.783254	0.180567	0.064327	0.25067	0.0502873								0.118331	0.0826191	0.0457641	0.085303							0.103187	0.110344	0.326652	0.168574							0.0770476	0.0708561	0.0903473	0.00455299							0.102621	0.232529	0.126465
0.0983604	0.0582925	0.0558246	0.138599	0.112103								0.110265	0.122068	0.152703	0.390244							0.0650988	0.154593	0.322215	0.16975							0.0563034	0.0496628	0.252219	0.0269051							0.138906	0.236046	0.0976763
0.213313	0.19473	0.270414	0.215392	0.199714								0.0891553	0.0535058	0.120246	0.466848							0.0405376	0.0572826	0.184284	0.111389							0.0984836	0.0941163	0.065043	0.280036							0.261145	0.069348	0.191185
0.0139424	0.112056	0.270228	0.230076	0.20273								0.198378	0.0848063	0.356417	0.0655301							0.181842	0.13818	0.222686	0.0468239							0.18042	0.141188	0.191221	0.0618991							0.275962	0.0988008	0.15634
0.19059	0.100077	0.0604592	0.105029	0.183212								0.0790908	0.225693	0.306229	0.350691							0.297019	0.185058	0.219345	0.205946							0.0407477	0.0833213	0.227015	0.0931241							0.0508329	0.020427	0.096841
0.144097	0.0977153	0.173091	0.144403	0.0675663								0.200371	0.0748482	0.328829	0.151032							0.157745	0.176171	0.146538	0.188907							0.0910208	0.0484297	0.106996	0.0996237							0.0250572	0.155105	0.1087
0.0387172	0.293526	0.13137	0.219396	0.231903								0.366946	0.101807	0.110436	0.335041							0.0543625	0.152015	0.189262	0.14983							0.0733454	0.0826277	0.140017	0.0564384							0.105904	0.130605	0.188676
0.0658901	0.0426494	0.328209	0.401644	0.227743								0.162041	0.156277	0.134655	0.116995							0.0869521	0.0488201	0.221042	0.295006							0.07347	0.138368	0.113517	0.0639933							0.11509	0.0974781	0.141703
0.27234	0.556618	0.21837	0.236108	0.410084								0.186986	0.0232341	0.124348	0.242535							0.184701	0.130865	0.158451	0.260152							0.164999	0.0583418	0.0296243	0.0525976							0.0195562	0.139818	0.105109
0.127305	0.116444	0.0662698	0.232481	0.0997232								0.029354	0.252254	0.186737	0.161936							0.373641	0.152634	0.0669553	0.171234							0.0540624	0.138293	0.180432	0.173537							0.104256	0.169872	0.0905922
0.27538	0.152445	0.131341	0.08344	0.0682493								0.264524	0.258833	0.0260892	0.153754							0.183023	0.15114	0.0320171	0.280024							0.0545506	0.168809	0.0347765	0.0514346							0.130612	0.1513	0.46746
0.0798765	0.276057	0.270741	0.158126	0.303205								0.307059	0.455458	0.1889	0.22454							0.63479	0.232886	0.124379	0.309224							0.164249	0.270704	0.0661213	0.0343501							0.0443299	0.0390147	0.249897
0.148975	0.0196324	0.067438	0.139664	0.315687								0.133115	0.135927	0.147051	0.0827124							0.0885011	0.191689	0.0528712	0.204846							0.0862946	0.0501918	0.146252	0.107315							0.0976555	0.112818	0.165438
0.857362	0.176843	0.403799	0.1068	0.31881								0.978523	0.205737	0.238255	0.0473275							0.0843976	0.108357	0.124478	0.231498							0.0390286	0.0812715	0.232822	0.0552513							0.0653273	0.117372	0.113897
0.228893	0.0232074	0.126905	0.138857	0.337025								0.263229	0.161174	0.167083	0.140153							0.107326	0.271238	0.158043	0.354137							0.0736618	0.125105	0.136323	0.136076							0.0102218	0.168653	0.013563
0.15668	0.0395955	0.146363	0.149131	0.0967517								0.149429	0.243835	0.10055	0.113261							0.0943796	0.175021	0.123522	0.273544							0.0953791	0.348053	0.156546	0.0537094							0.0575976	0.151332	0.10734
0.234838	0.208889	0.150574	0.179502	0.121983								0.00435414	0.245613	0.0806142	0.0840581							0.057393	0.148014	0.184604	0.113277							0.152226	0.0486456	0.187844	0.189504							0.163292	0.191819	0.146131
0.264747	0.0256431	0.0517599	0.0059397	0.635066								0.139241	0.117468	0.0655004	0.20068							0.0833052	0.224027	0.121635	0.240946							0.169976	0.0366848	0.334686	0.354781							0.0211185	0.239113	0.140796
0.11546	0.0848928	0.319037	0.149259	0.0825433								0.131385	0.183855	0.0912338	0.0371531							0.136598	0.217762	0.217301	0.229623							0.230649	0.201996	0.155033	0.27638							0.216136	0.247319	0.159962
0.0731309	0.106204	0.187608	0.112634	0.162292								0.203032	0.134654	0.113579	0.283395							0.0455349	0.0871161	0.309656	0.144903							0.0736003	0.196872	0.295708	0.179897							0.144032	0.052249	0.313249
0.136986	0.0501467	0.109494	0.0558289	0.259373								0.34874	0.0627077	0.0613098	0.221605							0.0251824	0.028305	0.26156	0.384264							0.17522	0.161964	0.243991	0.202128							0.134542	0.0693234	0.309946
0.0936555	0.267326	0.164405	0.910868	0.107316								0.0625246	0.277092	0.101414	0.181346							0.274583	0.0473373	0.196521	0.17966							0.128737	0.100503	0.161382	0.0455876							0.0929857	0.157587	0.0980802
0.291445	0.0376789	0.0305983	0.219171	0.270655								0.106592	0.046551	0.235797	0.087447							0.184726	0.0774279	0.117755	0.110197							0.118302	0.141085	0.0961151	0.150693							0.135349	0.0768111	0.0386759
0.202477	0.303024	0.228581	0.138458	0.0630294								0.103662	0.175946	0.436014	0.169543							0.143003	0.0745906	0.336125	0.424749							0.0901455	0.0399895	0.0672912	0.150157							0.128801	0.141723	0.213479
0.25178	0.18122	0.164343	0.220498	0.156955								0.0441495	0.0960678	0.335142	0.190032							0.101306	0.125157	1.08009	0.220304							0.501319	0.0874748	0.119527	0.19286							0.0418565	0.0309794	0.0343244
0.236985	0.130126	0.170113	0.0991803	0.162519								0.266044	0.125419	0.328254	0.0207786							0.0262675	0.0823953	0.122307	0.152041							0.122343	0.09441	0.111269	0.268298							0.00992864	0.102207	0.0588465
0.355987	0.22811	0.0685594	0.287462	0.216236								0.112549	0.147766	0.0568856	0.222241							0.0940793	0.170459	0.155458	0.18517							0.219813	0.0746807	0.0127729	0.0968952							0.0547895	0.118629	0.0534901
0.0720832	0.193441	0.135191	0.115411	0.191813								0.0307162	0.0822782	0.0562771	0.116927							0.0814679	0.0791575	0.0812579	0.0316417							0.112246	0.0372176	0.046551	0.143949							0.0565534	0.0283715	0.0676063
0.265098	0.225161	0.171591	0.128855	0.28595								0.0931567	0.207664	0.179761	0.244567							0.0842487	0.10878	0.0234185	0.0452028							0.130659	0.0372555	0.107151	0.156017							0.0443817	0.0614733	0.0396759
0.142204	0.115905	0.20169	0.136287	0.181809								0.337686	0.0811579	0.184193	0.11856							0.10712	0.0552241	0.142329	0.0842823							0.0289206	0.0917936	0.0279531	0.253167							0.152215	0.167633	0.112272
0.197471	0.138638	0.150913	0.0887894	0.0175404								0.167806	0.152975	0.21388	0.188282							0.194227	0.115821	0.183406	0.266432							0.0686815	0.0233563	0.0416806	0.129606							0.135847	0.0395378	0.143727
0.0736559	0.364823	0.308861	0.109648	0.119969								0.298193	0.166262	0.0950725	0.181902							0.212212	0.126409	0.0883755	0.13994							0.052899	0.0945301	0.116482	0.0743886							0.187647	0.0389557	0.204786
0.105471	0.171018	0.16961	1.06358	0.145776								0.124959	0.142759	0.381305	0.232953							0.295713	0.050683	0.32235	0.103592							0.126251	0.0478821	0.207646	0.113661							0.0614549	0.0616954	0.129427
0.358861	0.0730214	0.255142	0.0865248	0.109631								0.116627	0.0190448	0.318482	0.0645526							0.169219	0.175726	0.134321	0.205871							0.221938	0.0501476	1.04185	0.0838753							0.242691	0.0580022	0.163354
0.0279905	0.326026	0.239178	0.104431	0.26943								0.264121	0.0628642	0.0836196	0.194468							0.0471615	0.068968	0.0797814	0.116422							0.14183	0.0464765	0.115014	0.252651							0.0851587	0.143443	0.101451
0.145499	0.0729045	0.138882	0.122863	0.0513585								0.101794	0.062061	0.180878	0.143387							0.326604	0.134802	0.118023	0.300052							0.280195	0.0436778	0.0184404	0.169178							0.106276	0.0465676	0.113058
0.0160268	0.0491583	0.230152	0.118273	0.346177								0.0772787	0.206189	0.311368	0.0759756							0.251321	0.189437	0.0984833	0.103625							0.119817	0.20335	0.0691696	0.0490992							0.188866	0.199705	0.115893
0.0491464	0.0942552	0.154171	0.170971	0.11796								0.658753	0.15515	0.0724117	0.156887							0.176844	0.121533	0.0673087	0.225713							0.194836	0.0405106	0.110441	0.15814							0.0839794	0.195062	0.0524247
0.166062	0.143969	0.201925	0.343008	0.273728								0.0834634	0.459525	0.15774	0.0262253							0.0792735	0.124978	0.0711385	0.185311							0.309584	0.032948	0.195715	0.434664							0.104739	0.188882	0.060676
0.269092	0.172524	0.108099	0.143687	0.0541129								0.0212507	0.0712393	0.0913619	0.127879							0.282085	0.11166	0.128912	0.212945							0.123964	0.0833259	0.166672	0.100317							0.04982	0.1296	0.0730486
0.178445	0.0811501	0.146156	0.127256	0.280635								0.35471	0.163365	0.172284	0.0130238							0.420925	0.369305	0.102022	0.10758							0.0607972	0.066792	0.158562	0.169626							0.0782301	0.132654	0.163732
0.208887	0.166712	0.216575	0.15227	0.0942589								0.129172	0.278239	0.18186	0.218385							0.0251894	0.146902	0.0826012	0.0671758							0.243781	0.2394	0.292875	0.21778							0.0563861	0.0250035	0.158514
0.148151	0.180849	0.234568	0.130586	0.118236								0.10894	0.213969	0.268178	0.144978							0.144419	0.137481	0.0204173	0.0885542							0.0642783	0.132131	0.155191	0.0159392							0.0987202	0.231918	0.244046
0.0527527	0.130202	0.19045	0.178916	0.225374								0.157956	0.129054	0.180745	0.207949							0.0843892	0.192823	0.0754968	0.0461597							0.0289689	0.107127	0.127303	0.0522954							0.104393	0.0695358	0.160498
0.0474592	0.306773	0.08913	0.0518167	0.169072								0.225505	0.210591	0.115449	0.21496							0.0668235	0.159727	0.147754	0.0153514							0.0342354	0.140636	0.0170031	0.0542141							0.129548	0.165576	0.225672
0.326213	0.108046	0.119638	0.312154	0.149619								0.174915	0.308244	0.0854496	0.119974							0.0761142	0.102611	0.0618471	0.0340876							0.0824683	0.0944494	0.0705249	0.206455							0.115814	0.0495225	0.334
0.205497	0.0944631	0.0736696	0.15695	0.192081								0.170284	0.188714	0.205258	0.305136							0.112408	0.21965	0.019839	0.355903							0.0312857	0.0628387	0.111132	0.115462							0.158223	0.0662102	0.204209
0.104398	0.0509032	0.0568994	0.15412	0.26256								0.148848	0.148519	0.150723	0.300287							0.218979	0.0629052	0.0460209	0.138383							0.0864083	0.128357	0.0729342	0.0898617							0.106055	0.0605638	0.0720605
0.259035	0.172793	0.0771003	0.236778	0.0954139								0.0238039	0.0438158	0.0996238	0.0815843							0.0829728	0.064512	0.0766276	0.0352251							0.298276	0.107194	0.139325	0.098778							0.113181	0.0917687	0.0552317
0.0230174	0.0819202	0.0816267	0.320551	0.208078								0.295064	0.165311	0.00257733	0.225189							0.057418	0.102051	0.0851543	0.0482886							0.153223	0.265786	0.0535207	0.0454148							0.0827071	0.0158284	0.187557
0.150772	0.259955	0.0995979	0.0918553	0.258223								0.130894	0.0956999	0.201686	0.168483							0.098439	0.300907	0.0925606	0.395256							0.114106	0.128808	0.693083	0.0855805							0.0729351	0.150185	0.0726718
0.179227	0.0841191	0.210774	0.837054	0.157365								0.191711	0.0652079	0.46505	0.183369							0.296071	0.315141	0.257954	0.0291274							0.203667	0.15224	0.0483773	0.0533273							0.0528322	0.0746493	0.0863276
0.0886568	0.151563	0.338076	0.102155	0.183329								0.0699933	0.0338641	0.177279	0.0685044							0.299103	0.134028	0.296812	0.0581758							0.115143	0.154878	0.116677	0.0869538							0.0911058	0.043858	0.137778
0.0443293	0.068146	0.219387	0.336257	0.075587								0.0571921	0.118376	0.121814	0.110068							0.446385	0.277662	0.00627001	0.0401183							0.143077	0.943638	0.517687	0.0327991							0.06177	0.157113	0.24111
0.159105	0.39734	0.220318	0.0278572	0.207253								0.0901121	0.137884	0.100975	0.17364							0.154392	0.154482	0.0231439	0.0540988							0.19379	0.11162	0.310438	0.0687572							0.0438669	0.144002	0.0586326
0.880506	0.0965914	0.135683	0.210762	0.132706								0.0890497	0.206933	0.0366508	0.0540287							0.0688736	0.217802	0.0676785	0.103896							0.0399338	0.0747166	0.143375	0.177419							0.0886495	0.23759	0.397814
0.266665	0.277929	0.116211	0.124481	0.105056								0.0799066	0.269517	0.170064	0.185896							0.259744	0.10204	0.12657	0.0927604							0.231315	0.100428	0.34053	0.0121385							0.190252	0.263053	0.125302
0.15802	0.135915	0.0312041	0.139876	0.0646953								0.160294	0.235597	0.0626319	0.218562							0.144976	0.103925	0.090989	0.0733309							0.131557	0.0513895	0.250335	0.0631833							0.0339605	0.138919	0.216574
0.0605418	0.215993	0.0832921	0.0347066	0.239275								0.0695475	0.218896	0.0214277	0.199692							0.222139	0.180695	0.273284	0.0215718							0.096715	0.696253	0.20035	0.100492							0.191094	0.12359	0.0685261
0.0464316	0.107067	0.0809989	0.20388	0.125724								0.163787	0.198213	0.138972	0.120143							0.700431	0.143598	0.0428382	0.0560837							0.0764398	0.139433	0.0895651	0.110916							0.165892	0.211301	0.082126
0.103085	0.113811	0.0548314	0.160238	0.0671628								0.365144	0.106726	0.0488582	0.227377							0.142346	0.271166	0.304236	0.0845551							0.128965	0.0999426	0.125398	0.21295							0.0463322	0.134363	0.209488
0.0244619	0.103758	0.175724	0.196503	0.248722								0.0667244	0.0434957	0.0627389	0.127805							0.168743	0.647557	0.0577018	0.0555361							0.276596	0.177992	0.0488958	0.389286							0.16864	0.125117	0.269521
0.227565	0.500758	0.148867	0.258559	0.0865576								0.0848343	0.172952	0.353133	0.0733998							0.392606	0.0600243	0.367877	0.0465944							0.202995	0.19149	0.00865278	0.141474							0.0833197	0.086169	0.26217
0.163807	0.0808467	0.201358	0.231775	0.133848								0.161776	0.189319	0.0936817	1.07626							0.159012	0.125119	0.0303912	0.0571754							0.202524	0.140792	0.0142047	0.618581							0.130094	0.164328	0.177072
0.339994	0.122518	0.161594	0.108308	0.259963								0.117837	0.217625	0.221634	0.151471							0.150844	0.23821	0.0517078	0.0383535							0.0503812	0.193067	0.0745348	0.266241							0.0594928	0.0230381	0.0370447
0.175756	0.126848	0.0424306	0.0666138	0.308924								0.242022	0.198822	0.206417	0.135967							0.109076	0.137898	0.0797983	0.0605287							0.232931	0.107239	0.058194	0.219528							0.0232241	0.0306892	0.107183
0.228449	0.0566802	0.300552	0.061585	0.236131								0.193098	0.286498	0.100295	0.18852							0.0482117	0.125469	0.0384075	0.0324022							0.0984426	0.165061	0.188625	0.177712							0.0580291	0.0756025	0.197299
0.072392	0.241513	0.206565	0.0418816	0.0777435								0.151105	0.277145	0.690213	0.073636							0.226543	0.307761	0.00440584	0.047693							0.121021	0.236632	0.0419772	0.0405864							0.0391122	0.0387067	0.173038
0.184212	0.145155	0.163597	0.334953	0.082678								0.21122	0.0165781	0.124935	0.0363944							0.0930462	0.222956	0.0063532	0.144522							0.0944932	0.179338	0.09363	0.170072							0.157763	0.0613134	0.189935
0.103073	0.0740027	0.0483835	0.300334	0.220228								0.289837	0.167654	0.23975	0.191193							0.0627421	0.217486	0.0858195	0.0742938							0.0545508	0.288882	0.107365	0.0758682							0.0535194	0.19594	0.307819
0.206275	0.289527	0.0625308	0.124035	0.0539201								0.117116	0.128942	0.0741456	0.297682							0.152144	0.0557957	0.117243	0.168097							0.115318	0.0983318	0.0775336	0.0491452							0.027083	0.0404992	0.100403
0.308158	0.266859	0.188664	0.212254	0.0390312								0.0493305	0.0988384	0.0640152	0.142492							0.0845144	0.0619537	0.0676892	0.198095							0.0802915	1.04527	0.0642631	0.0535755							0.0890371	0.125167	0.250331
0.131929	0.0761919	0.0879485	0.102463	0.182117								0.170025	0.0965881	0.185639	0.0523454							0.0311514	0.146168	0.0406922	0.456331							0.278011	0.214469	0.139027	0.0619682							0.36511	0.255147	0.138477
0.0831523	0.136417	0.334523	0.247947	0.046009								0.0319888	0.0835422	0.93251	0.0715558							0.0530694	0.0905053	0.108068	0.23654							0.0968822	0.192898	0.0245207	0.0840432							0.0684896	0.226081	0.173424
0.144907	0.168705	0.225629	0.0501824	0.0397723								0.19402	0.0895828	0.147983	0.148568							0.071398	0.167769	0.0848208	0.131062							0.131865	0.264218	0.211201	0.0437758							0.197093	0.120622	0.102219
0.228104	0.973673	0.094584	0.100677	0.2877								0.310082	0.227498	0.20964	0.204235							0.0825755	0.211856	0.158078	0.0678937							0.0137008	0.0407645	0.144924	0.0555245							0.192356	0.0171239	0.0904052
0.165178	0.164467	0.138436	0.13737	0.0143292								0.128946	0.176022	0.129543	0.12216							0.0700194	0.0952311	0.198493	0.0629471							0.158401	0.0928507	0.112843	0.0573667							0.162418	0.0218634	0.045991
0.131974	0.168359	0.143652	0.0603611	0.220419								0.294652	0.109434	0.0778702	0.168573							0.10005	0.0926687	0.158903	0.0893181							0.267728	0.0478714	0.0797623	0.0266962							0.103019	0.0579457	0.0495892
0.106728	0.0978905	0.255358	0.170366	0.206373								0.205401	0.0354984	0.0891175	0.0863473							0.18018	0.282649	0.106226	0.0914427							0.152173	0.168215	0.167012	0.00933485							0.101457	0.162951	0.026389
0.25003	0.141001	0.188252	0.161374	0.156372								0.116839	0.0356425	0.329815	0.0915476							0.321842	0.126375	0.0564234	0.135011							0.0602955	0.402259	0.165087	0.0842873							0.271352	0.0323111	0.273889
0.109646	0.134426	0.239919	0.23167	0.0249506								0.168676	0.0433102	0.150467	0.0406912							0.116303	0.200316	0.210489	0.0780724							0.143219	0.0448003	0.138341	0.137667							0.0346413	0.0280255	0.0693451
0.18065	0.0954596	0.197669	0.332152	0.204918								0.211437	0.0801312	0.0546477	0.996567							0.12018	0.170629	0.102138	0.0720044							0.100311	0.0370331	0.0847416	0.362336							0.154605	0.11434	0.265506
0.142031	0.101039	0.240247	0.105492	0.13392								0.105662	0.0668354	0.0278285	0.0926802							0.0570844	0.330718	0.0932581	0.06516							0.15751	0.0341974	0.0857601	0.101311							0.16064	0.202133	0.406645
0.195539	0.264332	0.159719	0.0764103	0.206228								0.0870162	0.346774	1.03564	0.264704							0.126023	0.1828	0.149845	0.134231							0.0640203	0.163571	0.0759361	0.034878							0.0991811	0.0716474	0.189678
0.20541	0.221022	0.0938734	0.120703	0.234724								0.130944	0.330948	0.189666	0.0654263							0.0908658	0.212975	0.079844	0.112996							0.119835	0.273155	0.19842	0.099128							0.114982	0.0168929	0.111341
0.0366082	0.122342	0.261973	0.232704	0.176786								0.273133	0.20846	0.192081	0.26396							0.367864	0.0857722	0.0245918	0.319033							0.0570868	0.145687	0.0852539	0.131294							1.03164	0.203568	0.0919002
0.0743744	0.790979	0.093041	0.184708	0.199865								0.332454	0.413388	0.0585108	0.252398							0.22722	0.27944	0.313997	0.218017							0.0695117	0.106675	0.0768695	0.23871							0.128965	0.00454865	0.0515676
0.223204	0.283967	0.13205	0.175299	0.0265457								0.0284974	0.136336	0.318994	0.160958							0.295621	0.170852	0.0889859	0.0850621							0.153327	0.0542127	0.16314	0.190844							0.0651267	0.340944	0.0772048
0.317387	0.154695	0.0890559	0.172087	0.688343								0.221261	0.178999	0.333471	0.0548432							0.0395867	0.0768146	0.0833018	0.05054							0.242917	0.174677	0.233068	0.0833472							0.10185	0.450854	0.187567
0.208328	0.0808076	0.133939	0.0329525	0.209302								0.358635	0.130251	0.0921656	0.309284							0.333129	0.0457981	0.0355482	0.144095							0.108629	0.361489	0.0813228	0.0530066							0.0679869	0.178703	0.00975055
0.108934	0.156678	0.137514	0.0546492	0.0202412								0.0964933	0.0728195	0.161171	0.0651701							0.1006	0.164508	0.0497416	0.0346819							0.133956	0.156259	0.034827	0.0605004							0.11681	0.11011	0.127113
0.159538	0.0333451	0.138519	0.127077	0.19752								0.107701	0.314828	0.0875711	0.327746							0.366974	0.0550555	0.197898	0.0517894							0.0691715	0.0942244	0.0332648	0.0976111							0.0728676	0.0736107	0.196107
0.224069	0.371301	0.190667	0.129206	0.19623								0.204958	0.277185	0.0808468	0.164912							0.143164	0.0336842	0.108981	0.0342357							0.0844128	0.196604	0.168864	0.614653							0.122317	0.0541006	0.0771404
0.205793	0.169864	0.141981	0.0568806	0.305795								0.111204	0.120583	0.112769	0.303215							0.0882376	0.0203684	0.180774	0.090603							0.0546701	0.281266	0.0860394	0.181703							0.0243437	0.0453947	0.0398545
0.0686608	0.238123	0.681443	0.31897	0.0123444								0.275827	0.0758623	0.0827959	0.184339							0.274735	0.0274966	0.283542	0.0416888							0.0097469	0.0641807	0.151633	0.307654							0.0571785	0.0615968	0.152676
0.182152	0.585085	0.123953	0.153194	0.167269								0.246487	0.233116	0.102537	0.183531							0.109762	0.0477508	0.0359988	0.0553196							0.0212871	0.306752	0.0994629	0.155741							0.123478	0.0781412	0.0699746
0.192506	0.454291	0.108569	0.116049	0.149065								0.0108991	0.230467	0.16108	0.178573							0.279368	0.0931601	0.316363	0.0772565							0.134651	0.0291551	0.11339	0.205921							0.194943	0.0494643	0.0611266
0.271328	0.0981463	0.0785239	0.113162	0.190094								0.291702	0.203502	0.0879335	0.115096							0.31921	0.0144103	0.0374515	0.113729							0.0603052	0.14258	0.109498	0.131582							0.190123	0.120338	0.212307
0.102201	0.376316	0.21679	0.156121	0.167387								0.259414	0.230829	0.174298	1.01122							0.278726	0.161066	0.131516	0.492366							0.20653	1.02946	0.04035	0.160133							0.30993	0.105276	0.0201396
0.0880393	0.0340872	0.11262	0.0886407	0.0446753								0.10317	0.293684	0.208426	0.347153							0.183823	0.145243	0.148302	0.462261							0.094441	0.271955	0.262107	0.149257							0.094692	0.0416195	0.132695
0.0777159	0.151107	0.252517	0.342989	0.0471735								0.12583	0.915582	0.175663	0.0498559							0.0837712	0.0366112	0.110385	0.417048							0.15091	0.226207	0.0698184	0.0764102							0.143907	0.116184	0.0602691
0.153091	0.0476592	0.234856	0.305519	0.120638								0.0601138	0.129292	0.288689	0.0740689							0.0332394	0.360919	0.0567052	0.0543407							0.042058	0.084131	0.280406	0.143788							0.0426694	0.69806	0.140545
0.27301	0.170944	0.265936	0.127565	0.391823								0.244729	0.12995	0.216669	0.0520695							0.099086	0.0495601	0.0408822	0.162879							0.107178	0.0809523	0.14811	0.137397							0.167856	0.148931	0.272177
0.0710414	0.0306291	0.141254	0.170096	0.28311								0.173458	0.212542	0.0710764	0.263828							0.169845	0.11017	0.0676526	0.0381049							0.157143	0.101298	0.0859405	0.207017							0.0648536	0.0466791	0.262334
0.0799999	0.2262	0.244932	0.165591	0.0581708								0.0883951	0.205083	0.180065	0.163344							0.0793028	0.0734903	0.21568	0.107714							0.115437	0.170276	0.240191	0.0661157							0.102627	0.0247543	0.3338
0.199997	0.207287	0.0446434	0.205711	0.159017								0.133921	0.340843	0.252853	0.141851							0.0491856	0.0920082	0.0735803	0.035514							0.0228621	0.148293	0.287491	0.156872							0.0507658	0.116678	0.553231
0.128576	0.0985493	0.254415	1.08835	0.125108								0.325632	0.296423	0.206472	0.144527							0.191201	0.0581981	0.0746666	0.0656337							0.133943	0.120888	0.262329	0.179853							0.218548	0.116049	0.120448
0.11437	0.077521	0.216275	0.159529	0.326744								0.256928	0.0746333	0.0986565	0.45628							0.142078	0.220659	0.0663853	0.130235							0.0701568	0.0490822	0.199226	0.0468132							0.280959	0.0600298	0.252598
0.0877486	0.10212	0.058197	0.0278521	0.093668								0.063329	0.0481941	0.112711	0.104806							0.0739092	0.014385	0.0848101	0.021383							0.0363444	0.23288	0.183282	0.0701286							0.0827826	0.124113	0.19892
0.101823	0.428983	0.159702	0.213332	0.207247								0.0905105	0.208452	0.156184	0.110134							0.126692	0.256579	0.0276829	0.0396871							0.0869082	0.0691201	0.137175	0.117012							0.152032	0.167366	0.244086
0.0261322	0.155723	0.249282	0.229912	0.182966								0.261736	0.0977656	0.0907667	0.138561							0.347491	0.00601499	0.0904223	0.112467							0.0797897	0.0950189	0.0856418	0.0362138							0.18272	0.151641	0.03152
0.0390583	0.0061379	1.09077	0.268922	0.0599794								0.0930862	0.294469	0.0268944	0.121033							0.275908	0.233067	0.0851555	0.0739649							0.252438	0.0668535	0.0227391	0.0318464							0.31942	0.0718279	0.148899
0.235509	0.0997907	0.181836	0.102861	0.0974841								0.2168	0.200621	0.210729	0.185399							0.0550534	0.147741	0.0502155	0.11203							0.135304	0.0562605	0.273751	0.149954							0.174207	0.0469772	0.212051
0.186089	0.0782309	0.239354	0.0878469	0.235851								0.082122	0.347504	0.0569826	0.105946							0.212776	0.144475	0.119636	0.137621							0.272855	0.0879554	0.221448	0.220052							0.0585402	0.248859	0.188366
0.152351	0.10459	0.0403625	0.10994	0.106305								0.0470731	0.0667744	0.0779035	0.0915357							0.541433	0.0815965	0.0372306	0.0508552							0.236725	0.0928275	0.246296	0.111891							0.13376	0.322286	0.132228
0.347955	0.0891373	0.148719	0.213146	0.279661								0.256398	0.0653035	0.10925	0.101527							0.120828	0.0466446	0.241077	0.0380338							0.14754	0.27358	0.194105	0.155318							0.131301	0.308382	0.083029
0.211756	0.153015	0.0231128	0.211551	0.17158								0.217048	0.0913117	0.19428	0.480163							0.0768342	0.0754037	0.244041	0.16254							0.12074	0.137985	0.172785	0.211014							0.124432	0.160437	0.0787819
0.27031	0.171233	0.0451103	0.00874216	0.0927912								0.276743	0.0739214	0.243696	0.162549							0.0343976	0.0820917	0.0884887	0.203644							0.175141	0.164788	0.130479	0.275137							0.0528215	0.0213483	0.0786431
0.248693	0.18661	0.056583	0.194458	0.201176								0.174605	0.14832	0.406321	0.161262							0.0558893	0.0755524	0.0553359	0.289503							0.0177278	0.171401	0.206344	0.124917							0.0642131	0.176461	0.202327
0.0801955	0.0710351	0.238224	0.32454	0.111737								0.0391871	0.229991	0.115335	0.159095							0.0607992	0.0327678	0.0424521	0.106741							0.065137	0.357952	0.180496	0.0525015							0.0422393	0.0321748	0.154759
0.0372642	0.133871	0.292942	0.418061	0.134821								0.267375	0.135687	0.108659	0.187609							0.0959924	0.114123	0.0404464	0.458845							0.0217894	0.211357	0.0795756	0.0795399							0.137419	0.0802323	0.0743718
0.260071	0.191313	0.199825	0.306032	0.139817								0.259454	0.232769	0.120107	0.200548							0.076034	0.0560073	0.133643	0.433987							0.0947116	0.17092	0.298452	0.0824667							0.1611	0.087703	0.215756
0.36165	0.119731	0.186886	0.0651703	0.216498								0.126209	0.19573	0.128594	0.139063							0.0131444	0.319299	0.011005	0.412373							0.0990066	0.169414	0.0395452	0.0456693							0.0659775	0.106326	0.0894386
0.147229	0.178392	0.311221	0.0778203	0.119114								0.0837923	0.107804	0.0840462	0.23872							0.0325326	0.118292	0.0169331	0.0838385							0.290513	0.135023	0.0180281	0.116815							0.139766	0.091426	0.181145
0.278559	0.0342808	0.213927	0.188986	0.0330023								0.361643	0.0111437	0.156482	0.0989956							0.10682	0.0191108	0.0953376	0.0282918							0.147291	0.238015	0.0409459	0.147847							0.0494522	0.0343664	0.114279
0.184752	0.0371241	0.279822	0.196933	0.0924836								0.203976	0.0768335	0.212633	0.173995							0.0895491	0.0911373	0.0828615	0.200963							0.0705509	0.0984727	0.0886683	0.230191							0.139667	0.164089	0.172789
0.0650523	0.0496458	0.328956	0.0266609	0.301143								0.101938	0.0891124	0.126868	0.229241							0.232953	0.0199075	0.0169956	0.17154							0.0429384	0.172788	0.106383	0.0753512							0.103626	0.141497	0.0900756
0.127486	0.20465	0.161145	0.145781	0.188483								0.0959041	0.0432965	0.231307	0.0817343							0.048767	0.0598202	0.109489	0.132378							0.098918	0.179384	0.0657007	0.280332							0.0636756	0.280623	0.105891
0.181006	0.087207	0.211841	0.0631592	0.168538								0.0206572	0.07282	0.332329	0.144594							0.113156	0.130595	0.0709517	0.218836							0.110875	0.143169	0.13624	0.150457							0.0588909	0.018478	0.038937
0.109875	0.112782	0.0928615	0.0546319	0.0967089								0.175972	0.0924924	0.125953	0.320826							0.396556	0.195971	0.0346922	0.198617							0.248963	0.139343	0.0421567	0.029982							0.125936	0.0557672	0.308825
0.307214	0.0317838	0.240378	0.261603	0.177119								0.202117	0.238198	0.213922	0.17983							0.130657	0.869882	0.220669	0.222937							0.219934	0.0230981	0.0821805	0.0939142							0.0410436	0.0853368	0.0983803
0.242184	0.113731	0.210318	0.237161	0.185884								0.115796	0.10534	0.228348	0.327284							0.297976	0.232529	0.104138	0.265941							0.326976	0.159508	0.0405738	0.228284							0.131677	0.204365	0.0917233
0.217475	0.300815	1.07256	0.33111	0.0448973								0.162363	0.242353	0.0228473	0.149378							0.317257	0.153485	0.0645321	0.343135							0.127884	0.119767	0.0654354	0.175158							0.192988	0.0769078	0.0878453
0.0339847	0.0940855	0.180535	0.16527	0.0986683								0.19307	0.20211	0.31354	0.0937055							0.0556479	0.104123	0.0554981	0.38545							0.0378815	0.0869912	0.0918783	0.254228							0.11786	0.0902723	0.110186
0.260781	0.156229	0.0603585	0.145608	0.142773								0.192773	0.171237	0.201712	0.0637548							0.109543	0.183455	0.126864	0.132779							0.125461	0.101731	0.0774077	0.0156903							0.156438	0.0156908	0.0420005
0.0462832	0.21095	0.0982389	0.281657	0.200528								0.0564929	0.0336848	0.663725	0.0911673							0.259326	0.0516457	0.0315134	0.0794271							0.11121	0.0549399	0.0478574	0.0291031							0.0470262	0.0232206	0.0827698
0.107531	0.245034	0.126061	0.852835	0.16825								0.147369	0.226281	0.164884	0.0825358							0.0320653	0.274464	0.0877367	0.165331							0.109436	0.29599	0.310931	0.0888436							0.131999	0.136036	0.065132
0.186722	0.130428	0.236314	0.0977575	0.626445								0.263183	0.1056	0.687964	0.113356							0.0874318	0.114363	0.0331248	0.0493896							0.191146	0.112891	0.141054	0.0893483							0.0755705	0.111439	0.11683
0.258358	0.208676	0.0945297	0.286884	0.129509								0.0790141	0.299934	0.0828677	0.188223							0.203048	0.0342356	0.0707305	0.157025							0.0282033	0.231735	0.105575	0.752086							0.0327491	0.150938	0.154136
0.260741	0.0741407	0.0401943	0.0839743	0.21041								0.142331	0.144507	0.327097	0.0843224							0.0913226	0.0771484	0.0231369	0.0488192							0.042728	0.165612	0.120371	0.144239							0.188636	0.0669852	0.171523
0.188654	0.779903	0.0851345	0.132406	0.158242								0.0858504	0.329181	0.0335514	0.212286							0.0352954	0.0496334	0.390082	0.0463851							0.015164	0.280431	0.0337492	0.113951							0.130057	0.0742178	0.0970469
0.289411	1.06944	0.144588	0.1198	0.089599								0.119679	0.196388	0.926339	0.076951							0.187621	0.260363	0.228153	0.181552							0.0587511	0.4077	0.206052	0.124712							0.0639402	0.102971	0.288083
0.0313695	0.0877714	0.0524007	0.119624	0.0733093								0.228139	0.298185	0.112225	0.108117							0.290624	0.119261	0.176392	0.281065							0.100046	0.0345128	0.155849	0.112143							0.0870908	0.053822	0.189053
0.0913655	0.281404	0.188266	0.0684558	0.239289								0.172055	0.0552649	0.122689	0.0657999							0.257068	0.0694892	0.102031	0.197278							0.0506737	0.0717328	0.369087	0.253826							0.0284009	0.0967718	0.13542
0.360415	0.366823	0.202357	0.0819272	0.149422								0.115507	0.283118	0.207807	0.904593							0.165058	0.0655393	0.101594	0.168573							0.15328	0.0293867	0.0822363	0.053789							0.122561	0.153261	0.0790585
0.177447	0.269089	0.134195	0.335154	0.148074								0.239357	0.262577	0.293022	0.161197							0.172468	0.173472	0.29207	0.299771							0.137252	0.18887	0.410187	0.0627681							0.0388611	0.114453	0.0832345
0.00848267	0.0975626	0.113938	0.0741459	0.0981246								0.399252	0.124907	0.0885766	0.254884							0.888603	0.111755	0.0641775	0.0159517							0.112791	0.0161901	0.0886325	0.0845785							0.0793699	0.110542	0.0511556
0.139259	0.141456	0.146413	0.0768366	0.0625612								0.260574	0.209747	0.14524	0.174845							0.252224	0.173789	0.0978962	0.15355							0.0704731	0.189729	0.237715	0.0574264							0.186205	0.0266657	0.778083
0.10748	0.204148	0.480285	0.0403812	0.189946								0.0718254	0.210959	0.308605	0.284107							0.240465	0.0270437	0.0230164	0.326199							0.0129043	0.197717	0.215492	0.105143							0.142062	0.118088	0.0956322
0.244766	0.269871	0.284055	0.643628	0.142491								0.0633209	0.206434	0.165805	0.0520221							0.213954	0.0621404	0.0822849	0.227656							0.128421	0.626177	0.0508037	0.0668115							0.0220889	0.0155935	0.0439076
0.00833234	0.226567	0.07401	0.29419	0.288602								0.0522055	0.0558813	0.217656	0.257498							0.113588	0.104209	0.0320237	0.048639							0.165066	0.0417882	0.0541734	0.0350143							0.87725	0.0295682	0.0295579
0.135248	0.168231	0.0647473	1.0712	0.137211								0.0389452	0.106139	0.204562	0.159001							0.158699	0.480741	0.0586711	0.143717							0.0811457	0.363671	0.148002	0.191724							0.242591	0.136238	0.146738
0.0774659	0.197081	0.167039	0.130951	0.18837								0.0305659	0.0285463	0.0241093	0.114529							0.0664708	0.237043	0.301968	0.204429							0.115135	0.152941	0.0453075	0.166184							0.415553	0.0648502	0.102635
0.530934	0.0933135	0.316612	0.181256	0.094305								0.177135	0.353965	0.13038	0.119147							0.338277	0.152673	0.09848	0.156103							0.0393406	0.16897	0.0450754	0.200705							0.0770279	0.0219292	0.147812
0.0190709	0.148984	0.0767388	0.128986	0.239493								0.102513	0.0323754	0.109471	0.583959							0.0526712	0.218517	0.179123	0.0933903							0.0236899	0.0557332	0.0644893	0.1859							0.197537	0.0800996	0.039873
0.124059	0.237446	0.0992473	0.182583	0.274142								0.190461	0.187324	0.173372	0.0419557							0.140829	0.189118	0.0840316	0.394125							0.305702	0.259354	0.0319613	0.161083							0.0544181	0.0658274	0.107409
0.152388	0.190586	0.0656419	0.281162	0.220216								0.205374	0.0166271	0.397146	0.306236							0.138445	0.270206	0.110054	0.314984							0.0749069	0.0388297	0.0795384	0.272416							0.110044	0.16805	0.0538293
0.173819	0.0632849	0.105797	0.19683	0.113425								0.0630459	0.112879	0.396695	0.0529179							0.167213	0.115988	0.348941	0.0601582							0.0248305	0.167995	0.0193475	0.0577785							0.257505	0.120337	0.0688884
0.32229	0.111909	0.0584915	0.169405	0.144843								0.282545	0.171555	0.277004	0.205018							0.172184	0.360379	0.368328	0.280663							0.0466993	0.163152	0.0731249	0.171091							0.0348372	0.0357442	0.0240969
0.194345	0.0754323	0.0651721	0.139634	0.252449								0.0765495	0.266482	0.290758	0.197296							0.0632946	0.295099	0.246859	0.177756							0.0313085	0.0856286	0.0152254	0.120678							0.0826028	0.260302	0.0187983
0.0676009	0.0846987	0.0907946	0.0456602	0.687198								0.139294	0.243753	0.114245	0.173754							0.419673	0.182593	0.241166	0.193722							0.180701	0.164355	0.107154	0.127734							0.0955522	0.108242	0.0444376
0.303101	0.210988	0.0737765	0.110224	0.179223								0.131703	0.187043	0.221181	0.0407861							0.179966	0.255601	0.100726	0.0951676							0.210634	0.292419	0.0466165	0.134544							0.137861	0.119969	0.0438948
0.195928	0.227889	0.109016	0.210951	0.132983								0.0565535	0.267611	0.224196	0.240257							0.0472979	0.119509	0.169066	0.24052							0.171605	0.158791	0.126151	0.149261							0.137381	0.113452	0.0990282
0.0526785	0.115488	0.0511028	0.396518	0.166244								0.552614	0.448266	0.171546	0.155864							0.109103	0.118422	0.276133	0.159539							0.126649	0.259318	0.253068	0.0571292							0.281011	0.117925	0.0466057
0.100166	0.0569012	0.321913	0.133498	0.0725051								0.083077	0.139646	0.293317	0.148206							0.342156	0.135146	0.211748	0.107435							0.0785584	0.0941984	0.227614	0.0863317							0.0510401	0.28911	0.0256374
0.206384	0.192907	0.359664	0.145976	0.216565								0.136067	0.220608	0.0569418	0.0468642							0.36429	0.0545264	0.0612698	0.10296							0.0227169	0.227498	0.490377	0.0454418							0.078349	0.0824262	0.0938826
0.083177	0.123491	0.192158	0.119975	0.176144								0.114167	0.245205	0.0579109	0.0551756							0.205292	0.406951	0.115853	0.0609319							0.248241	0.0409178	0.17559	0.0837089							0.046149	0.0427725	0.0986457
0.0730551	0.00392038	0.0671836	0.0522733	0.0352877								0.2455	0.247987	0.247747	0.0445422							0.0463748	0.328955	0.063731	0.340603							0.240918	0.107168	0.310635	0.055191							0.0216094	0.153634	0.0465332
0.144222	0.12028	0.150661	0.119014	0.06646								0.253738	0.235361	0.17268	0.1411							0.0115199	0.777857	0.252133	0.0880947							0.137048	0.0486736	0.132032	0.0591826							0.209616	0.175661	0.0727266
0.127903	0.136035	0.123443	0.040491	0.0615731								0.204323	0.0458572	0.625342	0.330047							0.0341035	0.150668	0.546241	0.207936							0.126193	0.0311964	0.0360687	0.0478245							0.0768805	0.141218	0.0392717
0.0068272	0.589069	0.274826	0.118905	0.0303956								0.153222	0.0460387	0.212518	0.166614							0.240606	0.287269	0.269021	0.107934							0.358567	0.0835368	0.0842664	0.0416679							0.0515998	0.113412	0.183014
0.0835959	0.14177	0.0793863	0.0884623	0.140041								0.0482809	0.228808	0.198952	0.157928							0.0667138	0.0617721	0.0832582	0.116745							0.109705	0.0629905	0.0402651	0.0521497							0.0372097	0.045032	0.203504
0.136644	0.233267	0.183773	0.156027	0.185903								0.0242442	0.169086	0.0422781	0.084365							0.0503764	0.149344	0.173801	0.334129							0.0815843	0.0606594	0.106124	0.0485732							0.0869526	0.0849642	0.0176696
0.154241	0.18296	0.106632	0.0276903	0.163859								0.211936	0.0940791	0.00952181	0.272939							0.11127	0.045343	0.127114	0.164804							0.0636892	0.126179	0.0711804	0.0366499							0.0835612	0.092362	0.155339
0.0526371	0.0767467	0.216019	0.117722	0.0475075								0.161293	0.38029	0.102509	0.0925488							0.203138	0.0423073	0.631858	0.0949947							0.0897576	0.126941	0.113836	0.0875923							0.0268474	0.0364861	0.0783739
0.126804	0.317634	0.430959	0.0377627	0.0969871								0.215329	0.25	0.22368	0.218376							0.161358	0.176986	0.0465772	0.224085							0.172089	0.113228	0.149813	0.192779							0.123239	0.0127819	0.0763768
0.0396844	0.140802	0.130182	0.152333	0.213062								0.0224288	0.053399	0.042349	0.0896571							0.232411	0.0830203	0.288302	0.314777							0.0743648	0.284774	0.149326	0.131337							0.0547902	0.140933	0.0719361
0.109972	0.190285	0.211136	0.23548	0.15569								0.222418	0.227256	0.118811	0.229222							0.0934123	0.285773	0.132379	0.232215							0.0564848	0.05859	0.113621	0.199419							0.130762	0.157009	0.0815875
0.119458	0.117683	0.149398	0.191964	0.0459048								0.0553658	0.180458	0.0243346	0.178471							0.124434	0.175037	0.0760973	0.161133							0.0670484	0.0968522	0.0526655	0.0142205							0.182627	0.0519484	0.0480894
0.150407	0.142771	0.208381	0.0365091	0.271864								0.0821478	0.209382	0.275181	0.0652744							0.150702	0.055384	0.122957	0.137477							0.0383293	0.0871604	0.0693093	0.0600121							0.119117	0.120372	0.0737511
0.153856	0.137928	0.236572	0.175198	0.187306								0.179228	0.214909	0.131469	0.167609							0.0467561	0.0399853	0.160394	0.070985							0.141336	0.0530743	0.147092	0.0189296							0.0552808	0.232185	0.0397869
0.0662159	0.221728	0.309275	0.0615095	0.0880089								0.0435034	0.065553	0.200152	0.202913							0.296869	0.217455	0.124032	0.0912296							0.0547591	0.227457	0.0354329	0.00477673							0.127065	0.0601963	0.00456856
0.131452	0.0433206	0.261315	0.322528	0.117037								0.221894	0.140538	0.285023	0.0368474							0.220069	0.0709289	0.116451	0.12048							0.0713924	0.158703	0.299462	0.0549977							0.0616645	0.0444462	0.186794
0.13306	0.1092	0.0808388	0.1385	0.0670163								0.0923225	0.143363	0.0792595	0.219146							0.195974	0.137711	0.194941	0.411979							0.0712201	1.01555	0.0769679	0.0838151							0.211888	0.062972	0.472473
0.260361	0.265319	0.241848	0.113523	0.115545								0.25663	0.2718	0.160573	0.206717							0.0722299	0.213912	0.449982	0.240028							0.0165554	0.361127	0.083401	0.273094							0.060948	0.0834992	0.0883461
0.117066	0.155796	0.0483483	0.190796	0.12538								0.265741	0.407257	0.325148	0.0136066							0.385421	0.17099	0.194662	0.22965							0.0432443	0.186721	0.10848	0.515131							0.28333	0.183691	0.0700989
0.0711555	0.196735	0.0691596	0.118399	0.262312								0.0757445	0.201101	0.186022	0.255064							0.0533724	0.133686	0.197756	0.261134							0.0315471	0.151869	0.0662714	0.115234							0.10783	0.082359	0.270756
0.164439	0.178857	0.0481267	0.15089	0.117093								0.0595504	0.305377	0.149624	0.0606015							0.131835	0.0645053	0.115801	0.382077							0.0968707	0.154059	0.0701278	0.18799							0.122007	0.0288054	0.304061
0.534663	0.178931	0.136454	0.0416779	0.539155								0.272724	0.185121	0.111876	0.0945773							0.146711	0.196976	0.0411733	0.198944							0.280849	0.106961	0.127673	0.132875							0.0688431	0.199339	0.253409
0.140889	0.25276	0.0584853	0.215292	0.149988								0.11856	0.534824	0.112553	0.0750994							0.0359629	0.016883	0.0492278	0.123377							0.195828	0.102841	0.1462	0.296191							0.0360129	0.012543	0.0988456
0.153918	0.0730472	0.195415	0.188629	0.0702858								0.125802	0.161214	0.0342987	0.0715944							0.753349	0.156856	0.161808	0.172044							0.167335	0.188181	0.0581637	0.283284							0.0231398	0.0661203	0.0904147
0.144049	0.095678	0.0779301	0.176898	0.0829564								0.228975	0.0550305	0.133204	0.124564							0.0462432	0.28508	0.264309	0.0804251							0.117671	0.198206	0.0427308	0.128471							0.0979013	0.0178944	0.0390173
0.971822	0.173027	0.175809	0.0477647	0.115051								0.168625	0.151642	0.135608	0.111732							0.121723	0.145328	0.235962	0.323757							0.0843621	0.270826	0.256086	0.0853011							0.191991	0.105127	0.0732687
0.165383	0.0217393	0.161686	0.25989	0.0939748								0.199164	0.114709	0.0403625	0.410597							0.277299	0.206604	0.0708593	0.234645							0.121883	0.10994	0.12035	0.0881523							0.0491286	0.0710108	0.124079
0.130239	0.156977	1.03185	0.328071	0.0664384								0.0950355	0.114324	0.322054	0.0277727							0.240681	0.258586	0.0926454	0.093362							0.0652956	0.0127311	0.0698081	0.146939							0.104523	0.170248	0.0767157
0.0396795	0.220382	0.186044	0.0679605	0.173355								0.222271	0.195964	0.0819354	0.146044							0.234744	0.242369	0.0474333	0.038912							0.0590494	0.0602439	0.0767069	0.0776948							0.099874	0.0832687	0.190094
0.280732	0.141636	0.076653	0.199501	0.295439								0.124609	0.0765184	0.0560444	0.303957							0.249139	0.0219667	0.237178	0.0306294							0.115819	0.0184419	0.325451	0.0319283							0.337658	0.0546456	0.163994
0.102788	0.200479	0.150661	0.102592	0.248743								0.194769	0.219566	0.136795	0.126636							0.218147	0.108916	0.201933	0.068101							0.110886	0.151155	0.0880198	0.0260267							0.295391	0.0816607	0.0142552
0.110178	0.11813	0.543258	0.0666105	0.181883								0.11972	0.211544	0.223874	0.0754151							0.290679	0.220995	0.112796	0.0246618							0.0393943	0.0547635	0.194447	0.171385							0.0414243	0.0984285	0.0629915
0.308093	0.143674	0.15932	0.192589	0.108442								0.070847	0.988454	0.118556	0.199413							0.150116	0.0902774	0.0523253	0.0586467							0.0588354	0.211682	0.101951	0.128418							0.0138328	0.284406	0.139867
0.196543	0.254486	0.148539	0.150882	0.136023								0.176575	0.15503	0.115219	0.182509							0.349796	0.0867799	0.122356	0.0574865							0.128023	0.214313	0.362789	0.281584							0.0429498	0.0346858	0.333605
0.0858628	0.155594	0.0566799	0.179988	0.963289								0.148228	0.0419957	0.132459	0.172464							0.108743	0.147613	0.167552	0.0164829							0.0688537	0.0486922	0.403902	0.115272							0.0285902	0.101886	0.0812086
0.141398	0.1579	0.155108	0.204772	0.210293								0.0734404	0.100662	0.139609	0.231471							0.23327	0.114236	0.151557	0.110422							0.0314503	0.0584689	0.041592	0.0407026							0.0388163	0.0783946	0.0729287
0.149432	0.0502898	0.0340403	0.072684	0.0999011								0.230375	0.0599382	0.0587188	0.17408							0.0674304	0.320647	0.105536	0.068466							0.114516	0.104044	0.0975443	0.154556							0.0499085	0.128407	0.0320953
0.0535457	0.156626	0.0671277	0.0708681	0.343638								0.211151	0.115174	0.0955385	0.0757678							0.342206	0.252838	0.0296553	0.0832941							0.174374	0.075816	0.143239	0.0930495							0.120123	0.128456	0.0612297
0.275213	0.118838	0.188038	0.0341779	0.05555								0.0669073	0.172471	0.0665533	0.191496							0.269825	0.102609	0.0291618	0.0825016							0.0772369	0.129888	0.0930832	0.138287							0.059517	0.060218	0.109673
0.153882	0.111836	0.0894419	0.0803215	0.156028								0.335036	0.157984	0.0658999	0.240167							0.215598	0.197598	0.181107	0.0647418							0.18216	0.165241	0.109893	0.0961914							0.106168	0.134097	0.0522711
0.0705954	0.231332	0.100887	0.136328	0.242914								0.524735	0.319105	0.0962099	0.181659							0.191437	0.0646564	0.0669538	0.087389							0.179928	0.0608077	0.203196	0.311377							0.0358195	0.110299	0.110812
0.0239335	0.142892	0.0902728	0.499951	0.14848								0.275531	0.100712	0.266467	0.339342							0.170577	0.0521922	0.126586	0.0347253							0.147825	0.106576	0.0587374	0.142086							0.0736811	0.176281	0.176494
0.131098	0.125414	0.251223	0.115473	0.123486								0.111184	0.0399313	0.0494514	0.168114							0.281533	0.141918	0.848423	0.0226558							0.218444	0.194368	0.0765113	0.153814							0.0571067	0.212118	0.293406
0.205211	0.128351	0.0571837	0.0718603	0.234051								0.0911592	0.218635	0.191315	0.181269							0.170712	0.273056	0.32957	0.0173228							0.1709	0.0541761	0.0982274	0.223776							0.0485417	0.235682	0.12085
0.0636228	0.371476	0.201305	0.0841117	0.267281								0.256945	0.2441	0.179546	0.180767							0.139451	0.124755	0.227482	0.0878678							0.222402	0.119647	0.0862292	0.246643							0.123116	0.207535	0.06474
0.159211	0.110803	0.0389266	0.283606	0.177369								0.135288	0.0513861	0.0978378	0.168751							0.52518	0.184235	0.174815	0.00116361							0.0476468	0.120985	0.19459	0.0453744							0.0601079	0.143898	0.0845725
0.114011	0.373882	0.168979	0.232681	0.215568								0.333949	0.313589	0.288594	0.151037							0.0475138	0.614536	0.148973	0.10256							0.273902	0.042686	0.0944842	0.0686723							0.0736097	0.264068	0.22524
0.0260806	0.0699185	0.155495	0.195318	0.164973								0.173536	0.0958539	0.128108	0.107183							0.198945	0.165558	0.181013	0.00087253							0.213601	0.0747613	0.083816	0.0532645							0.153042	0.209352	0.124976
0.1403	0.209379	0.108956	0.0851762	0.166851								0.132591	0.0806342	0.0362079	0.257529							0.114496	0.567966	0.203713	0.238497							0.129477	0.20355	0.138288	0.114392							0.200069	0.22794	0.0316029
0.206163	0.302153	0.138428	0.100873	0.833864								0.79329	0.185039	0.221558	0.0585048							0.121949	0.114066	0.182162	0.075016							0.0545904	0.183326	0.0515086	0.133926							0.0644613	0.10022	0.0556196
0.301276	0.185167	0.277347	0.174093	0.0992751								0.0450767	0.105182	0.233177	0.0935498							0.27595	0.0577531	0.120283	0.781652							0.106051	0.1214	0.16362	0.148045							0.0229013	0.145982	0.128966
0.36435	0.0575649	0.104653	0.204491	0.149545								0.0280501	0.226242	0.0224066	0.0413769							0.234677	0.112485	0.228792	0.763918							0.0478302	0.122939	0.0689107	0.032315							0.12002	0.103306	0.182671
0.163119	0.166274	0.111739	0.200827	0.104871								0.280145	0.815754	0.210812	0.146327							0.0420369	0.145396	0.162136	0.288624							0.179622	0.0495558	0.233632	0.101735							0.169727	0.00659786	0.233981
0.0505123	0.296063	0.193672	0.0927236	0.1535								0.292498	0.0283202	0.0300135	0.0338889							0.239985	0.0245205	0.0746477	0.0602382							0.285893	0.123494	0.0989475	0.0510384							0.161755	0.106923	0.076706
0.0520401	0.208546	0.158299	0.0423911	0.256912								0.2323	0.0916556	0.0396352	0.0442209							0.0359695	0.0943061	0.237473	0.0173513							0.117917	0.250243	0.101497	0.0799119							0.122395	0.055071	0.0767837
0.157709	0.102455	0.0481305	0.282145	0.154159								0.186026	0.0680379	0.130659	0.0436617							0.503183	0.818505	0.118152	0.13772							0.0108387	0.0778062	0.13658	0.0113784							0.237661	0.140597	0.0725428
0.0555706	0.119	0.160607	0.244985	0.162105								0.04848	0.0412867	0.232822	0.0695434							0.596399	0.231084	0.122228	0.13203							0.0438296	0.0425068	0.058573	0.13449							0.0406495	0.0512352	0.220721
0.0587906	0.171332	0.144172	0.941799	0.196836								0.874137	0.245679	0.11735	0.141251							0.246449	0.148979	0.17837	0.143486							0.0574012	0.0750197	0.269499	0.0186775							0.0784641	0.094367	0.170873
0.0559753	0.248793	0.019055	0.0741028	0.0839192								0.260363	0.00946603	0.129356	0.0933072							0.128976	0.0256117	0.0771091	0.243035							0.0425833	0.0645903	0.105481	0.190017							0.126337	0.0370356	0.167926
0.157019	0.195957	0.133726	0.0667498	0.792591								0.135875	0.224515	0.207158	0.087761							0.245149	0.0280962	0.191452	0.198249							0.137767	0.110953	0.0392086	0.109038							0.0824092	0.0849691	0.0836107
0.132505	0.140413	0.309239	0.210773	0.0647538								0.0873283	0.221042	0.15222	0.0778463							0.142834	0.0126997	0.0368687	0.26021							0.18626	0.155875	0.0597668	0.0555697							0.127156	0.354737	0.120878
0.202115	0.320659	0.118331	0.217659	0.320601								0.204988	0.0630838	0.134933	0.189038							0.0493472	0.0833942	0.0801441	0.175955							0.108293	0.0416734	0.151344	0.31232							0.0887541	0.153211	0.152192
0.143541	0.0684711	0.195518	0.188812	0.142216								0.0920395	0.0145382	0.252589	0.0289963							0.0817174	0.191278	0.0646221	0.2411							0.0662504	0.0249215	0.0624705	0.383016							0.112356	0.131684	0.067051
0.0768716	0.30519	0.098767	0.0968677	0.0301717								0.0851741	0.141953	0.30586	0.0726458							0.15129	0.320981	0.239327	0.198974							0.0692751	0.125406	0.309198	0.159554							0.134074	0.123516	0.0945661
0.132032	0.212407	0.170405	0.971888	0.0454343								0.476012	0.215305	0.118045	0.0727749							0.0202326	0.105175	0.261879	0.187797							0.107726	0.0148845	0.0677565	0.0375374							0.0584459	0.0478664	0.0506637
0.100444	0.0978149	0.115139	0.120405	0.145787								0.0757023	0.268983	0.160923	0.0417051							0.0649329	0.0136503	0.196277	0.0734201							0.0369337	0.226193	0.374538	0.103181							0.0651941	0.0579802	0.085736
0.270137	0.0898939	0.0559854	0.145353	0.114332								0.13881	0.162579	0.0889955	0.0853238							0.0366464	0.113208	0.198506	0.273472							0.200432	0.0482223	0.107769	0.0647534							0.0589954	0.108933	0.047801
0.105926	0.0678033	0.109912	0.0798258	0.151017								0.256696	0.210493	0.0751076	0.0976038							0.093569	0.113363	0.0261191	0.0209253							0.237403	0.0566428	0.0918309	0.228363							0.166423	0.179569	0.1538
0.134142	0.141872	0.127349	0.291736	0.084906								0.227273	0.0301584	0.101806	0.0520148							0.0786746	0.18109	0.175633	0.2051							0.0746228	0.04543	0.0360937	0.173517							0.0910203	0.471695	0.0204275
0.0612518	0.225931	0.182414	0.109489	0.356908								0.177979	0.323232	0.0974015	0.25087							0.106801	0.101199	0.0473922	0.0962242							0.0221568	0.0916725	0.0748972	0.0679857							0.0756677	0.0243176	0.172761
0.164686	0.0879974	0.126005	0.08102	0.238978								0.21841	0.0657998	0.0969024	0.243385							0.129393	0.107096	0.217473	0.311992							0.223995	0.0674894	0.0791679	0.219604							0.205153	0.20011	0.161313
0.0348817	0.237174	0.436816	0.168562	0.22202								0.0443148	0.0859428	0.128511	0.144697							0.0231351	0.0643559	0.080814	0.163989							0.265243	0.0850933	0.0667451	0.181893							0.127275	0.175521	0.286278
0.345544	0.282831	0.228113	0.242151	0.214704								0.101106	0.0683964	0.124456	0.172745							0.123019	0.0962683	0.0977303	0.196321							0.09034	0.059798	0.0200546	0.158528							0.0957029	0.221817	0.398258
0.0715065	0.193559	0.0969863	0.227946	0.267512								0.145603	0.0668455	0.0603016	0.0787311							0.0503086	0.156747	0.0981836	0.0506025							0.108221	0.0841087	0.108405	0.103988							0.0687232	0.322096	0.0900596
0.17768	0.24781	0.163358	0.165048	0.173436								0.0645562	0.0393462	0.0627091	0.168537							0.0723189	0.0533644	0.0661136	0.097072							0.120223	0.131183	0.195315	0.217333							0.0209691	0.253656	0.0945674
0.120372	0.106509	0.238047	0.247186	0.157973								0.0809038	0.0891747	0.0155138	0.0521712							0.120221	0.115742	0.270752	0.0987922							0.0191995	0.0809783	0.134189	0.265252							0.165422	0.122451	0.0728112
0.0410637	0.11198	0.229802	0.118332	0.219947								0.0946932	0.0865069	0.0877158	0.273917							0.0585013	0.0552327	0.195113	0.0999628							0.0621182	0.0648658	0.115087	0.0598495							0.0833359	0.248848	0.290299
0.0600601	0.224944	0.518236	0.156793	0.0532997								0.062641	0.0701432	0.110891	0.19706							0.236484	0.118604	0.0648848	0.0532767							0.0294484	0.222371	0.0635464	0.15047							0.0539171	0.0546382	0.0735577
0.115859	0.179802	0.123317	0.938106	0.0986724								0.0555158	0.140599	0.073111	0.190186							0.0891369	0.0887347	0.0910169	0.0504732							0.423756	0.136472	0.232747	0.195204							0.0550779	0.124105	0.0931814
0.382873	0.128044	0.0969768	0.207302	0.211411								0.134182	0.128523	0.074672	0.202086							0.138349	0.388143	0.1699	0.0925345							0.163903	0.140194	0.235876	0.222045							0.0808038	0.310238	0.0522298
0.176015	0.0914927	0.022509	0.169893	0.165099								0.0563209	0.354259	0.149543	0.180056							0.228953	0.097428	0.289628	0.0975627							0.00985464	0.143066	0.0597553	0.127495							0.123912	0.099401	0.0887214
0.146082	0.122756	0.284901	0.0511179	0.114103								0.0616111	0.624202	0.0220406	0.0656006							0.116544	0.206443	0.174095	0.0725833							0.093961	0.0399355	0.0413226	0.174467							0.0800098	0.168213	0.0619256
0.214798	0.120992	0.117206	0.308513	0.123654								0.0582343	0.0971181	0.0236504	0.166972							0.183539	0.0514513	0.0896799	0.0944119							0.243957	0.0873809	0.2031	0.156728							0.156428	0.124924	0.0825028
0.0993304	0.300323	0.149877	0.175776	0.108987								0.0437184	0.185707	0.128915	0.159745							0.0887004	0.170876	0.0467514	0.212138							0.0935422	0.260651	0.0650193	0.181545							0.0560192	0.276958	0.139857
0.108873	0.183426	0.253189	0.0771356	0.129013								0.161136	0.163262	0.0622879	0.129151							0.378058	0.928575	0.209258	0.0853697							0.131706	0.129895	0.0742956	0.228304							0.126264	0.0725489	0.0922916
0.0999978	0.079814	0.305042	0.121696	0.15468								0.105774	0.183878	0.0730996	0.115028							0.218845	0.127043	0.129115	0.083303							0.0234054	0.0822782	0.125461	0.0897495							0.109171	0.0910191	0.145155
0.288615	0.127049	0.0945509	0.0875687	0.118863								0.0842697	0.164447	0.114654	0.219565							0.164364	0.0774863	0.464119	0.00279132							0.378272	0.339368	0.0531719	0.398868							0.184054	0.215265	0.0753044
0.228919	0.242967	0.157383	0.0545483	0.0824313								0.0456666	0.271705	0.333565	0.199689							0.0495486	0.172738	0.185605	0.0506753							0.0799143	0.105357	0.133589	0.19127							0.131597	0.206464	0.244059
0.225476	0.0991881	0.225523	0.121664	0.0421032								0.0405384	0.12437	0.147324	0.120673							0.107035	0.191288	0.0702272	0.0935313							0.118214	0.212201	0.0536309	0.116027							0.0493693	0.249558	0.240928
0.130686	0.0859783	0.105225	0.228865	0.319575								0.0310131	0.169473	0.375289	0.261153							0.154229	0.182484	0.114074	0.0366295							0.0811076	0.231483	0.180749	0.0786209							0.038618	0.0579719	0.101964
0.17434	0.162607	0.0226642	0.0332507	0.02955								0.0503469	0.128134	0.11407	0.163076							0.0509726	0.0364645	0.0348983	0.17093							0.107333	0.146364	0.171221	0.0888755							0.0995698	0.0461815	0.141449
0.0405918	0.0778834	0.0351968	0.0430242	0.0701967								0.106802	0.180318	0.434483	0.282612							0.301113	0.129162	0.0805542	0.0556259							0.550332	0.0682513	0.0924136	0.111091							0.257718	0.141025	0.0195498
0.123752	0.285543	0.235265	0.0503674	0.0784686								0.0581193	0.131464	0.119948	0.287016							0.274145	0.0506171	0.0748164	0.201829							0.0342769	0.226614	0.13614	0.0983204							0.0609942	0.178376	0.204842
0.295535	0.085578	0.0587547	0.226904	0.260215								0.223875	0.257175	0.135535	0.249758							0.0320129	0.23855	0.113649	0.104061							0.123951	0.294458	0.148934	0.161257							0.169149	0.0419079	0.109726
[truncated: 16,052 more rows]
[truncated: 14 more columns]
