# Supplementary material for: Membrane-mediated dimerization potentiates PIP5K lipid kinase activity
Source: eLife. 2022 Aug 17;11:e73747. doi: 10.7554/eLife.73747 (PMC9470164; doi:10.7554/eLife.73747)
Supplement: Figure 2—source data 3. [file elife-73747-fig2-data3.xlsx]

## Sheet: Figure 2F
Figure 2F
	membrane intensity
[Ax647-5KB],nM	0.5% PIP2	1% PIP2	2% PIP2	4% PIP2
0	0	0	0	0
1.95312	0.379275	0.237031	3.0864	63.6994
3.90625	0.151581	0.174815	8.66641	153.554
7.8125	0.875211	0.126345	20.651	340.725
15.625	0.656545	0.399278	53.7617	849.679
31.25	1.79984	0.967494	136.069	1748.28
62.5	2.25283	5.46624	345.909	4520.52
125	3.37062	15.1627	718.289	6700.97
250	2.58664	53.2246	1235.76	7347.97
500	4.50616	138.94	1879.96	7467.72
1000	5.10868	203.149	2504.97	7509.58
values listed under the PIP2 density represent number of membrane bound PIP5KB per µm2
