# Supplementary material for: Membrane-mediated dimerization potentiates PIP5K lipid kinase activity
Source: eLife. 2022 Aug 17;11:e73747. doi: 10.7554/eLife.73747 (PMC9470164; doi:10.7554/eLife.73747)
Supplement: Figure 3—figure supplement 1—source data 1. [file elife-73747-fig3-figsupp1-data1.xlsx]

## Sheet: Figure 3 - FS1
Figure 3 - figure supplement 1
Single molecule displacements for Ax647-5KB (raw data, sorted) units = µm, 2% PI(4,5)P2					Probability Density Ax647-5KB					Single molecule displacements for Ax647-5KB (D51R) (raw data, sorted) units = µm, 2% PI(4,5)P2					Probability Density Ax647-5KB (D51R)
mov1	mov2	mov3			step size (µm) bin center	mov1	mov2	mov3		mov1	mov2	mov3			step size (µm) bin center	mov1	mov2	mov3		FINAL STATISTICS
0.00066	0.00055	0.00022			0	0.0565795	0.0874208	0.105265		0.00066	0.00066	0.00011			0	0.0686996	0.0726015	0.0776236		Ax647-5KB	movie	mov1	mov2	mov3	AVE	SD
0.00077	0.00055	0.00088			0.01	0.577797	0.507986	0.68287		0.00077	0.00077	0.00088			0.01	0.635121	0.642853	0.624269		diffusion coefficient (µm2/sec)	D1	0.1745	0.1738	0.1642	0.170833	0.00575529
0.00088	0.00066	0.00154			0.02	1.20017	1.17427	1.27532		0.00077	0.00077	0.00143			0.02	1.16649	1.13654	1.20481			STEPS	58325	42324	74099	174748
0.00121	0.00077	0.00165			0.03	1.72996	1.83584	1.85428		0.00088	0.00099	0.00154			0.03	1.85349	1.7002	1.67711
0.00143	0.00143	0.00165			0.04	2.25632	2.04848	2.43593		0.00165	0.00099	0.00154			0.04	2.31616	2.149	2.27295		Ax647-5KB(D51R)	movie	mov1	mov2	mov3	AVE	SD
0.00154	0.00143	0.00176			0.05	2.7261	2.69823	2.83405		0.00176	0.0011	0.00165			0.05	2.80827	2.60177	2.69168		diffusion coefficient (µm2/sec)	D1	0.1732	0.1746	0.1745	0.1741	0.000781025
0.00187	0.00143	0.00176			0.06	3.00214	3.08099	3.30099		0.00176	0.0011	0.00165			0.06	3.05503	3.07434	3.10276			STEPS	71325	75756	91467	238548
0.00209	0.00154	0.00187			0.07	3.43078	3.50865	3.60464		0.00198	0.00132	0.00187			0.07	3.53593	3.39643	3.43403
0.00231	0.00209	0.00198			0.08	3.65024	3.8796	3.94472		0.00198	0.00132	0.00187			0.08	3.84998	3.81752	3.75545
0.00242	0.00209	0.00198			0.09	3.98628	4.04735	4.12556		0.00209	0.00154	0.00198			0.09	4.01402	4.03928	3.99598
0.00264	0.0022	0.00209			0.1	4.12173	4.38522	4.23622		0.0022	0.00154	0.00198			0.1	4.14581	4.15413	4.14904
0.00264	0.00231	0.00209			0.11	5.1213	5.04914	5.37119		0.0022	0.00165	0.00198			0.11	4.69541	5.01874	4.92418
0.00297	0.00253	0.0022			0.12	4.25204	4.41593	4.42786		0.0022	0.00187	0.00198			0.12	4.36453	4.45245	4.30538
0.00319	0.00264	0.0022			0.13	4.36862	4.17494	4.40492		0.00231	0.00198	0.00209			0.13	4.33649	4.27425	4.26821
0.0033	0.00264	0.00231			0.14	4.24175	4.06389	4.20518		0.00231	0.0022	0.00209			0.14	4.39397	4.21221	4.34583
0.00341	0.0033	0.00242			0.15	4.28804	4.25291	4.12826		0.00253	0.0022	0.0022			0.15	3.99159	4.07492	4.11624
0.00341	0.0033	0.00242			0.16	4.12516	4.09224	4.08238		0.00264	0.00231	0.0022			0.16	3.97056	3.98384	4.06704
0.00352	0.00341	0.00253			0.17	3.98971	3.81108	3.82866		0.00275	0.00242	0.00231			0.17	3.87101	4.01552	3.90961
0.00352	0.00352	0.00275			0.18	3.65709	3.80635	3.68291		0.00275	0.00242	0.00242			0.18	3.82755	3.7106	3.61114
0.00352	0.00363	0.00286			0.19	3.36734	3.39051	3.48183		0.00286	0.00253	0.00242			0.19	3.51069	3.48223	3.46245
0.00363	0.00363	0.00286			0.2	3.44449	3.22748	3.21732		0.00286	0.00253	0.00253			0.2	3.24571	3.25783	3.31704
0.00374	0.00363	0.00297			0.21	3.05529	3.08572	3.02163		0.00308	0.00264	0.00264			0.21	3.06905	3.04926	2.96719
0.00374	0.00385	0.00308			0.22	3.17703	3.21803	3.13095		0.00319	0.00275	0.00275			0.22	2.95969	3.15487	3.13446
0.00385	0.00396	0.00308			0.23	2.54093	2.52812	2.33876		0.00319	0.00297	0.00275			0.23	2.52226	2.56877	2.50254
0.00418	0.00396	0.00319			0.24	2.4312	2.40053	2.26184		0.00319	0.00308	0.00275			0.24	2.32737	2.43017	2.39212
0.00418	0.00407	0.00319			0.25	2.24261	2.11228	2.04591		0.0033	0.00319	0.00275			0.25	2.14651	2.20841	2.15597
0.00429	0.00407	0.0033			0.26	1.89284	1.98469	1.80029		0.00341	0.00319	0.00275			0.26	1.94602	1.93516	1.96027
0.0044	0.00429	0.0033			0.27	1.70081	1.74369	1.61271		0.00352	0.0033	0.00286			0.27	1.68244	1.77544	1.66508
0.00451	0.00462	0.00341			0.28	1.54308	1.48143	1.45346		0.00352	0.0033	0.00286			0.28	1.57028	1.50879	1.50874
0.00462	0.00462	0.00341			0.29	1.33562	1.39401	1.26992		0.00363	0.00341	0.00286			0.29	1.31931	1.37547	1.36552
0.00484	0.00473	0.00341			0.3	1.20189	1.23334	1.12822		0.00363	0.00363	0.00297			0.3	1.26463	1.21575	1.23214
0.00495	0.00473	0.00352			0.31	1.0973	1.08213	0.987868		0.00396	0.00363	0.00297			0.31	1.15107	1.03886	1.13046
0.00495	0.00473	0.00352			0.32	0.958423	1.03724	0.867758		0.00396	0.00374	0.00297			0.32	0.936558	0.934579	1.00583
0.00506	0.00484	0.00352			0.33	0.884698	0.989982	0.807028		0.00407	0.00385	0.00297			0.33	0.921136	0.881778	0.898685
0.00506	0.00484	0.00352			0.34	0.754393	0.767886	0.732803		0.00418	0.00385	0.00319			0.34	0.691202	0.708855	0.762023
0.00506	0.00495	0.00352			0.35	0.612087	0.699367	0.554663		0.00418	0.00385	0.00319			0.35	0.587452	0.670574	0.617709
0.00506	0.00495	0.00363			0.36	0.584655	0.533976	0.453447		0.00429	0.00385	0.00319			0.36	0.584648	0.510851	0.559765
0.00517	0.00506	0.00363			0.37	0.516074	0.507986	0.425107		0.00429	0.00385	0.0033			0.37	0.483701	0.49237	0.481048
0.00528	0.00506	0.00374			0.38	0.414916	0.434742	0.411611		0.0044	0.00385	0.00341			0.38	0.395373	0.409209	0.412171
0.00539	0.00506	0.00374			0.39	0.4012	0.380399	0.360329		0.0044	0.00396	0.00341			0.39	0.368735	0.369608	0.389211
0.00539	0.00517	0.00385			0.4	0.265752	0.361497	0.278006		0.0044	0.00396	0.00341			0.4	0.335086	0.307566	0.356413
0.0055	0.00528	0.00385			0.41	0.300043	0.281164	0.271259		0.00451	0.00396	0.00341			0.41	0.284613	0.290406	0.274416
0.00561	0.00528	0.00385			0.42	0.305186	0.323693	0.219976		0.00451	0.00396	0.00352			0.42	0.24816	0.282486	0.25911
0.00572	0.00528	0.00385			0.43	0.246892	0.222096	0.226724		0.00451	0.00418	0.00363			0.43	0.215913	0.211204	0.193512
0.00572	0.0055	0.00385			0.44	0.197171	0.28589	0.199733		0.00473	0.00429	0.00363			0.44	0.236944	0.205924	0.220845
0.00572	0.00561	0.00396			0.45	0.198886	0.186655	0.198383		0.00473	0.0044	0.00374			0.45	0.154224	0.180844	0.18258
0.00572	0.00561	0.00396			0.46	0.166309	0.15594	0.163295		0.00473	0.0044	0.00374			0.46	0.159832	0.147843	0.149781
0.00583	0.00572	0.00396			0.47	0.190313	0.144126	0.133605		0.00473	0.00451	0.00385			0.47	0.182264	0.165003	0.149781
0.00583	0.00572	0.00407			0.48	0.133733	0.132313	0.133605		0.00495	0.00462	0.00385			0.48	0.141605	0.161043	0.138848
0.00583	0.00572	0.00407			0.49	0.121732	0.127587	0.102565		0.00506	0.00462	0.00385			0.49	0.100946	0.133323	0.137755
0.00583	0.00594	0.00407			0.5	0.12859	0.127587	0.0931187		0.00506	0.00462	0.00396			0.5	0.117771	0.120122	0.123542
0.00583	0.00605	0.00407			0.51	0.126875	0.101597	0.112012		0.00506	0.00484	0.00407			0.51	0.106555	0.112202	0.094023
0.00594	0.00616	0.00429			0.52	0.118303	0.0850581	0.105265		0.00506	0.00495	0.00407			0.52	0.10375	0.097682	0.101676
0.00594	0.00627	0.00429			0.53	0.101157	0.0921463	0.0850214		0.00528	0.00495	0.00407			0.53	0.0757098	0.113522	0.100583
0.00594	0.00627	0.00429			0.54	0.114874	0.115774	0.0796232		0.00528	0.00495	0.00429			0.54	0.0883281	0.0792016	0.0819968
0.00594	0.00627	0.00429			0.55	0.0805829	0.0992345	0.0998664		0.00539	0.00506	0.00429			0.55	0.0827199	0.102962	0.0830901
0.00605	0.00649	0.00429			0.56	0.0805829	0.0826954	0.0553314		0.00539	0.00506	0.00429			0.56	0.0743077	0.0726015	0.0809035
0.00605	0.00649	0.00429			0.57	0.0702958	0.05198	0.0809728		0.00539	0.00506	0.00429			0.57	0.0701016	0.0726015	0.0765303
0.00616	0.0066	0.00429			0.58	0.054865	0.068519	0.0634287		0.00539	0.00517	0.0044			0.58	0.0771118	0.0554412	0.0830901
0.00627	0.00671	0.00429			0.59	0.058294	0.0708818	0.0458846		0.00539	0.00517	0.0044			0.59	0.0701016	0.0765616	0.0645041
0.00627	0.00682	0.0044			0.6	0.0737248	0.0543427	0.0634287		0.0055	0.00517	0.0044			0.6	0.0560813	0.0778816	0.0655974
0.00627	0.00693	0.0044			0.61	0.0702958	0.0637936	0.0553314		0.00561	0.00528	0.0044			0.61	0.0799159	0.0660014	0.067784
0.00627	0.00693	0.0044			0.62	0.0514359	0.0637936	0.0607296		0.00572	0.00528	0.0044			0.62	0.0588854	0.0726015	0.0634108
0.00638	0.00693	0.0044			0.63	0.0617231	0.05198	0.0620791		0.00572	0.00539	0.0044			0.63	0.0518752	0.050161	0.0568511
0.00638	0.00693	0.00462			0.64	0.0480069	0.0614309	0.0485837		0.00572	0.00539	0.00462			0.64	0.0757098	0.0752416	0.0470115
0.00638	0.00704	0.00462			0.65	0.054865	0.0448918	0.0607296		0.00572	0.0055	0.00462			0.65	0.0630915	0.048841	0.0557578
0.00649	0.00704	0.00462			0.66	0.054865	0.0614309	0.0620791		0.00572	0.0055	0.00473			0.66	0.0630915	0.0514811	0.0710639
0.00649	0.00715	0.00462			0.67	0.058294	0.0425291	0.0472341		0.00583	0.00561	0.00484			0.67	0.0448651	0.0541211	0.0743438
0.00649	0.0077	0.00462			0.68	0.0531505	0.0472545	0.0580305		0.00583	0.00561	0.00495			0.68	0.0588854	0.0607213	0.0535712
0.00649	0.0077	0.00473			0.69	0.0377197	0.05198	0.0607296		0.00583	0.00561	0.00495			0.69	0.0546793	0.0620413	0.0645041
0.0066	0.0077	0.00473			0.7	0.0480069	0.0425291	0.0377873		0.00583	0.00561	0.00495			0.7	0.0715037	0.0554412	0.0634108
0.0066	0.00781	0.00473			0.71	0.0325761	0.0330782	0.0472341		0.00594	0.00572	0.00506			0.71	0.0574834	0.0541211	0.0776236
0.00671	0.00781	0.00473			0.72	0.0325761	0.0637936	0.05938		0.00605	0.00572	0.00506			0.72	0.0546793	0.0633613	0.0481048
0.00671	0.00781	0.00484			0.73	0.0514359	0.0448918	0.0526323		0.00605	0.00583	0.00506			0.73	0.0644935	0.0528011	0.0481048
0.00671	0.00792	0.00484			0.74	0.0462923	0.0307154	0.0431855		0.00605	0.00583	0.00506			0.74	0.0532773	0.0620413	0.075437
0.00671	0.00792	0.00484			0.75	0.0462923	0.0330782	0.0418359		0.00605	0.00583	0.00506			0.75	0.0462671	0.0356407	0.0557578
0.00671	0.00792	0.00484			0.76	0.0497214	0.0496172	0.0485837		0.00616	0.00594	0.00517			0.76	0.0686996	0.046201	0.0470115
0.00682	0.00803	0.00495			0.77	0.0514359	0.0425291	0.0566809		0.00616	0.00594	0.00517			0.77	0.0546793	0.0580812	0.0546645
0.00693	0.00803	0.00528			0.78	0.0428633	0.0212645	0.0499332		0.00616	0.00594	0.00517			0.78	0.0616894	0.047521	0.060131
0.00693	0.00814	0.00528			0.79	0.0377197	0.0236273	0.0620791		0.00616	0.00594	0.00528			0.79	0.040659	0.0567612	0.0502914
0.00693	0.00814	0.00528			0.8	0.0377197	0.0425291	0.0472341		0.00616	0.00605	0.00528			0.8	0.0378549	0.0554412	0.060131
0.00704	0.00825	0.00539			0.81	0.0480069	0.0283527	0.0404864		0.00616	0.00605	0.00539			0.81	0.0518752	0.046201	0.0546645
0.00704	0.00825	0.00539			0.82	0.0480069	0.0236273	0.0391368		0.00627	0.00605	0.00539			0.82	0.0546793	0.0528011	0.060131
0.00704	0.00825	0.00539			0.83	0.0565795	0.0401663	0.0526323		0.00638	0.00605	0.00539			0.83	0.0574834	0.0752416	0.0491981
0.00715	0.00847	0.00539			0.84	0.0428633	0.0425291	0.0539818		0.00638	0.00616	0.00539			0.84	0.0476691	0.0356407	0.0546645
0.00715	0.00847	0.0055			0.85	0.0394342	0.0425291	0.0472341		0.00638	0.00616	0.0055			0.85	0.043463	0.0435609	0.0393585
0.00726	0.00847	0.0055			0.86	0.029147	0.0212645	0.0418359		0.00638	0.00616	0.0055			0.86	0.0546793	0.047521	0.0459182
0.00726	0.00858	0.0055			0.87	0.0377197	0.0401663	0.0377873		0.00649	0.00616	0.0055			0.87	0.0462671	0.0607213	0.0404517
0.00737	0.00869	0.0055			0.88	0.0411487	0.0330782	0.0458846		0.00649	0.00616	0.00561			0.88	0.043463	0.048841	0.0623176
0.00737	0.00869	0.0055			0.89	0.0428633	0.0378036	0.0337386		0.00649	0.00627	0.00561			0.89	0.0546793	0.050161	0.0491981
0.00748	0.00869	0.00561			0.9	0.0308616	0.0354409	0.0364377		0.00649	0.00627	0.00561			0.9	0.043463	0.0514811	0.0491981
0.00748	0.00869	0.00561			0.91	0.0325761	0.0330782	0.0337386		0.00649	0.00638	0.00561			0.91	0.042061	0.0303606	0.0655974
0.00748	0.0088	0.00561			0.92	0.0411487	0.0378036	0.0688268		0.0066	0.00638	0.00561			0.92	0.0504732	0.0448809	0.0491981
0.00759	0.0088	0.00572			0.93	0.0325761	0.0354409	0.0499332		0.0066	0.00649	0.00572			0.93	0.0392569	0.0396008	0.0470115
0.00759	0.0088	0.00583			0.94	0.0274325	0.0354409	0.0418359		0.00671	0.00649	0.00572			0.94	0.0364529	0.050161	0.0579444
0.00781	0.0088	0.00583			0.95	0.0428633	0.0448918	0.0364377		0.00671	0.0066	0.00583			0.95	0.0462671	0.0514811	0.0535712
0.00781	0.00891	0.00583			0.96	0.0205744	0.0283527	0.0364377		0.00671	0.0066	0.00583			0.96	0.0364529	0.0448809	0.0426383
0.00792	0.00891	0.00594			0.97	0.0240034	0.0212645	0.0337386		0.00671	0.0066	0.00583			0.97	0.042061	0.0435609	0.0437316
0.00792	0.00891	0.00594			0.98	0.0428633	0.0212645	0.0404864		0.00671	0.0066	0.00594			0.98	0.0560813	0.0448809	0.0404517
0.00792	0.00913	0.00594			0.99	0.0411487	0.0378036	0.0431855		0.00671	0.0066	0.00594			0.99	0.0490712	0.0396008	0.0513847
0.00792	0.00924	0.00594			1	0.0377197	0.0448918	0.0526323		0.00682	0.0066	0.00594			1	0.0476691	0.050161	0.0502914
0.00792	0.00924	0.00594			1.01	0.0445778	0.02599	0.0431855		0.00693	0.00671	0.00594			1.01	0.0364529	0.0567612	0.0470115
0.00803	0.00924	0.00605			1.02	0.0325761	0.0189018	0.0350882		0.00693	0.00671	0.00594			1.02	0.042061	0.046201	0.041545
0.00803	0.00935	0.00605			1.03	0.0308616	0.0283527	0.0350882		0.00704	0.00671	0.00594			1.03	0.0294427	0.0422409	0.0349853
0.00803	0.00935	0.00605			1.04	0.0360051	0	0.0472341		0.00704	0.00671	0.00605			1.04	0.0490712	0.0303606	0.041545
0.00803	0.00935	0.00616			1.05	0.0497214	0	0.0472341		0.00704	0.00682	0.00605			1.05	0.0336488	0.0369608	0.0327987
0.00803	0.00935	0.00616			1.06	0.00685812	0	0.0283405		0.00704	0.00682	0.00605			1.06	0.0378549	0.0382808	0.0284256
0.00814	0.00946	0.00616			1.07	0	0	0.0391368		0.00704	0.00682	0.00616			1.07	0.0336488	0.0237605	0.0404517
0.00814	0.00946	0.00627			1.08	0	0	0.0364377		0.00715	0.00682	0.00616			1.08	0.0224325	0.0330007	0.0229591
0.00814	0.00946	0.00627			1.09	0	0	0.0404864		0.00715	0.00682	0.00616			1.09	0.0336488	0.0237605	0.0284256
0.00825	0.00946	0.00627			1.1	0	0	0.0134955		0.00715	0.00682	0.00616			1.1	0.00981423	0.0158403	0.00765303
0.00825	0.00946	0.00627								0.00726	0.00693	0.00616
0.00825	0.00957	0.00627								0.00726	0.00693	0.00616
0.00836	0.00957	0.00627								0.00726	0.00693	0.00616
0.00836	0.00968	0.00627								0.00737	0.00693	0.00627
0.00836	0.00968	0.00638								0.00737	0.00693	0.00627
0.00847	0.00979	0.00638								0.00737	0.00704	0.00627
0.00858	0.00979	0.00638								0.00748	0.00715	0.00627
0.00858	0.00979	0.00649								0.00748	0.00715	0.00627
0.00858	0.00979	0.00649								0.00748	0.00715	0.00627
0.00858	0.00979	0.00649								0.00748	0.00715	0.00638
0.0088	0.00979	0.00649								0.00748	0.00715	0.00638
0.0088	0.0099	0.0066								0.00748	0.00726	0.00638
0.0088	0.01001	0.00671								0.00759	0.00726	0.00649
0.00891	0.01001	0.00671								0.00759	0.00737	0.00649
0.00891	0.01001	0.00671								0.00759	0.00737	0.00649
0.00891	0.01012	0.00671								0.0077	0.00737	0.00649
0.00902	0.01012	0.00671								0.0077	0.00737	0.0066
0.00902	0.01012	0.00682								0.0077	0.00748	0.00671
0.00913	0.01012	0.00682								0.0077	0.00748	0.00671
0.00913	0.01023	0.00682								0.0077	0.00748	0.00671
0.00913	0.01023	0.00682								0.0077	0.00759	0.00671
0.00913	0.01034	0.00682								0.0077	0.00759	0.00671
0.00913	0.01034	0.00693								0.00781	0.00759	0.00682
0.00913	0.01045	0.00693								0.00781	0.00759	0.00682
0.00913	0.01045	0.00693								0.00781	0.0077	0.00682
0.00913	0.01045	0.00693								0.00781	0.00781	0.00682
0.00913	0.01056	0.00693								0.00781	0.00781	0.00682
0.00924	0.01056	0.00704								0.00781	0.00781	0.00682
0.00924	0.01056	0.00704								0.00792	0.00792	0.00682
0.00924	0.01067	0.00704								0.00792	0.00792	0.00682
0.00924	0.01078	0.00704								0.00792	0.00792	0.00693
0.00924	0.01089	0.00715								0.00792	0.00792	0.00693
0.00924	0.01089	0.00715								0.00792	0.00792	0.00693
0.00935	0.01089	0.00715								0.00792	0.00792	0.00693
0.00935	0.01089	0.00715								0.00792	0.00792	0.00693
0.00935	0.01089	0.00715								0.00803	0.00803	0.00704
0.00935	0.01089	0.00715								0.00803	0.00803	0.00704
0.00946	0.01089	0.00715								0.00803	0.00803	0.00704
0.00946	0.011	0.00726								0.00803	0.00814	0.00715
0.00946	0.011	0.00726								0.00803	0.00825	0.00715
0.00946	0.011	0.00726								0.00814	0.00825	0.00715
0.00946	0.011	0.00726								0.00814	0.00825	0.00715
0.00957	0.01111	0.00726								0.00814	0.00825	0.00726
0.00957	0.01111	0.00726								0.00825	0.00825	0.00726
0.00968	0.01122	0.00726								0.00825	0.00836	0.00726
0.00968	0.01122	0.00737								0.00836	0.00836	0.00737
0.00979	0.01122	0.00737								0.00836	0.00836	0.00737
0.00979	0.01133	0.00737								0.00836	0.00836	0.00737
0.0099	0.01133	0.00737								0.00847	0.00836	0.00748
0.0099	0.01144	0.00748								0.00847	0.00847	0.00748
0.0099	0.01155	0.00748								0.00847	0.00847	0.00748
0.01001	0.01155	0.00748								0.00847	0.00847	0.00759
0.01001	0.01166	0.00748								0.00858	0.00847	0.00759
0.01001	0.01166	0.00759								0.00858	0.00847	0.00759
0.01001	0.01166	0.00759								0.00858	0.00858	0.00759
0.01001	0.01177	0.00759								0.00858	0.00858	0.00759
0.01001	0.01188	0.0077								0.00858	0.00869	0.00759
0.01012	0.01188	0.0077								0.00869	0.00869	0.00759
0.01012	0.01188	0.0077								0.00869	0.00869	0.00759
0.01012	0.01199	0.0077								0.00869	0.0088	0.0077
0.01012	0.01199	0.0077								0.0088	0.0088	0.0077
0.01023	0.01199	0.00781								0.0088	0.0088	0.0077
0.01023	0.01199	0.00781								0.0088	0.00891	0.00781
0.01034	0.0121	0.00781								0.0088	0.00891	0.00781
0.01034	0.01221	0.00781								0.00891	0.00891	0.00781
0.01045	0.01221	0.00781								0.00891	0.00891	0.00792
0.01045	0.01221	0.00792								0.00902	0.00891	0.00792
0.01056	0.01232	0.00792								0.00902	0.00902	0.00792
0.01056	0.01232	0.00792								0.00902	0.00902	0.00792
0.01067	0.01232	0.00792								0.00902	0.00902	0.00792
0.01067	0.01232	0.00792								0.00902	0.00902	0.00803
0.01067	0.01243	0.00803								0.00902	0.00902	0.00803
0.01078	0.01243	0.00803								0.00902	0.00902	0.00803
0.01089	0.01243	0.00803								0.00913	0.00913	0.00803
0.01089	0.01243	0.00803								0.00913	0.00913	0.00803
0.01089	0.01254	0.00803								0.00913	0.00913	0.00803
0.01089	0.01265	0.00803								0.00924	0.00913	0.00803
0.01089	0.01276	0.00814								0.00924	0.00913	0.00803
0.011	0.01276	0.00814								0.00924	0.00913	0.00814
0.011	0.01276	0.00825								0.00935	0.00913	0.00814
0.01111	0.01276	0.00825								0.00935	0.00913	0.00814
0.01111	0.01287	0.00836								0.00935	0.00913	0.00825
0.01111	0.01298	0.00836								0.00946	0.00913	0.00825
0.01111	0.01298	0.00836								0.00946	0.00924	0.00825
0.01122	0.01309	0.00836								0.00946	0.00924	0.00825
0.01122	0.0132	0.00836								0.00957	0.00924	0.00836
0.01122	0.0132	0.00836								0.00957	0.00924	0.00836
0.01122	0.0132	0.00836								0.00957	0.00924	0.00836
0.01133	0.0132	0.00847								0.00957	0.00935	0.00836
0.01133	0.01331	0.00847								0.00968	0.00935	0.00847
0.01144	0.01331	0.00847								0.00968	0.00935	0.00847
0.01155	0.01331	0.00847								0.00968	0.00935	0.00847
0.01155	0.01342	0.00858								0.00968	0.00935	0.00858
0.01166	0.01342	0.00858								0.00968	0.00935	0.00858
0.01166	0.01353	0.00858								0.00968	0.00946	0.00858
0.01166	0.01353	0.00858								0.00968	0.00957	0.00869
0.01166	0.01364	0.00858								0.00968	0.00957	0.00869
0.01166	0.01364	0.00858								0.00979	0.00957	0.00869
0.01166	0.01364	0.00869								0.00979	0.00968	0.00869
0.01177	0.01364	0.00869								0.00979	0.00968	0.00869
0.01177	0.01375	0.00869								0.00979	0.00968	0.00869
0.01177	0.01375	0.00869								0.00979	0.00968	0.00869
0.01177	0.01386	0.0088								0.00979	0.00968	0.00869
0.01177	0.01386	0.0088								0.00979	0.00979	0.00869
0.01177	0.01386	0.0088								0.0099	0.00979	0.0088
0.01177	0.01386	0.0088								0.0099	0.00979	0.0088
0.01177	0.01386	0.0088								0.0099	0.00979	0.0088
0.01188	0.01386	0.0088								0.0099	0.00979	0.0088
0.01188	0.01397	0.0088								0.0099	0.00979	0.0088
0.01188	0.01397	0.00891								0.01001	0.00979	0.0088
0.01188	0.01408	0.00891								0.01001	0.00979	0.00891
0.01199	0.01408	0.00891								0.01001	0.00979	0.00891
0.01199	0.01408	0.00902								0.01001	0.0099	0.00891
0.01199	0.01408	0.00902								0.01001	0.0099	0.00891
0.01199	0.01408	0.00902								0.01001	0.0099	0.00902
0.0121	0.01419	0.00902								0.01001	0.0099	0.00902
0.0121	0.01419	0.00902								0.01001	0.0099	0.00902
0.0121	0.01419	0.00902								0.01012	0.01001	0.00902
0.0121	0.01419	0.00902								0.01012	0.01001	0.00913
0.0121	0.0143	0.00902								0.01023	0.01001	0.00913
0.01221	0.0143	0.00913								0.01023	0.01001	0.00913
0.01221	0.01441	0.00913								0.01023	0.01001	0.00913
0.01221	0.01441	0.00913								0.01023	0.01001	0.00913
0.01221	0.01452	0.00913								0.01023	0.01001	0.00913
0.01221	0.01452	0.00913								0.01023	0.01012	0.00913
0.01221	0.01452	0.00924								0.01023	0.01012	0.00924
0.01232	0.01452	0.00924								0.01023	0.01012	0.00924
0.01232	0.01452	0.00924								0.01023	0.01012	0.00924
0.01232	0.01463	0.00935								0.01023	0.01012	0.00924
0.01232	0.01463	0.00935								0.01034	0.01023	0.00924
0.01243	0.01463	0.00935								0.01034	0.01023	0.00924
0.01243	0.01474	0.00935								0.01034	0.01023	0.00924
0.01254	0.01485	0.00935								0.01034	0.01023	0.00924
0.01265	0.01485	0.00935								0.01034	0.01023	0.00935
0.01265	0.01485	0.00935								0.01045	0.01023	0.00935
0.01265	0.01485	0.00946								0.01045	0.01023	0.00935
0.01276	0.01485	0.00946								0.01045	0.01023	0.00935
0.01276	0.01496	0.00946								0.01045	0.01023	0.00946
0.01276	0.01496	0.00946								0.01045	0.01034	0.00946
0.01276	0.01496	0.00957								0.01045	0.01034	0.00946
0.01276	0.01496	0.00957								0.01056	0.01034	0.00946
0.01276	0.01507	0.00957								0.01056	0.01034	0.00946
0.01276	0.01507	0.00957								0.01056	0.01034	0.00957
0.01287	0.01518	0.00957								0.01056	0.01045	0.00957
0.01287	0.01518	0.00957								0.01067	0.01056	0.00957
0.01287	0.01518	0.00968								0.01067	0.01056	0.00957
0.01287	0.01518	0.00968								0.01067	0.01056	0.00968
0.01287	0.01518	0.00968								0.01067	0.01056	0.00968
0.01298	0.01518	0.00968								0.01067	0.01056	0.00968
0.01298	0.01529	0.00968								0.01067	0.01056	0.00968
0.01298	0.01529	0.00968								0.01067	0.01067	0.00968
0.01298	0.01529	0.00968								0.01067	0.01067	0.00968
0.01298	0.0154	0.00979								0.01067	0.01067	0.00968
0.01298	0.0154	0.00979								0.01067	0.01067	0.00968
0.01298	0.0154	0.00979								0.01078	0.01067	0.00979
0.01298	0.0154	0.00979								0.01078	0.01067	0.00979
0.01309	0.0154	0.00979								0.01078	0.01067	0.00979
0.01309	0.01551	0.00979								0.01078	0.01067	0.00979
0.01309	0.01551	0.00979								0.01078	0.01067	0.00979
0.01309	0.01551	0.00979								0.01089	0.01067	0.00979
0.01309	0.01551	0.0099								0.01089	0.01067	0.00979
0.0132	0.01551	0.0099								0.01089	0.01067	0.00979
0.0132	0.01551	0.0099								0.01089	0.01078	0.00979
0.0132	0.01562	0.0099								0.01089	0.01078	0.00979
0.0132	0.01562	0.01001								0.01089	0.01078	0.0099
0.01331	0.01562	0.01001								0.011	0.01078	0.0099
0.01331	0.01562	0.01001								0.011	0.01078	0.0099
0.01331	0.01562	0.01001								0.011	0.01078	0.0099
0.01331	0.01573	0.01001								0.01111	0.01078	0.0099
0.01331	0.01573	0.01001								0.01111	0.01078	0.0099
0.01331	0.01573	0.01001								0.01111	0.01078	0.01001
0.01342	0.01573	0.01001								0.01111	0.01089	0.01001
0.01342	0.01584	0.01012								0.01122	0.01089	0.01001
0.01342	0.01584	0.01012								0.01122	0.01089	0.01012
0.01342	0.01584	0.01012								0.01122	0.01089	0.01012
0.01342	0.01584	0.01012								0.01122	0.01089	0.01012
0.01342	0.01584	0.01012								0.01122	0.01089	0.01023
0.01342	0.01584	0.01012								0.01122	0.01089	0.01023
0.01342	0.01584	0.01023								0.01122	0.011	0.01023
0.01353	0.01595	0.01023								0.01133	0.011	0.01023
0.01353	0.01595	0.01023								0.01133	0.011	0.01034
0.01364	0.01606	0.01034								0.01133	0.011	0.01034
0.01364	0.01606	0.01034								0.01133	0.011	0.01034
0.01364	0.01617	0.01034								0.01133	0.011	0.01034
0.01364	0.01617	0.01034								0.01144	0.011	0.01034
0.01364	0.01617	0.01034								0.01144	0.011	0.01034
0.01364	0.01617	0.01034								0.01144	0.01111	0.01034
0.01364	0.01628	0.01034								0.01155	0.01111	0.01034
0.01364	0.01628	0.01045								0.01155	0.01111	0.01034
0.01364	0.01639	0.01045								0.01155	0.01111	0.01034
0.01375	0.01639	0.01045								0.01155	0.01122	0.01045
0.01375	0.01639	0.01045								0.01155	0.01122	0.01045
0.01375	0.01639	0.01045								0.01166	0.01122	0.01045
0.01375	0.01639	0.01045								0.01166	0.01122	0.01045
0.01375	0.01639	0.01045								0.01166	0.01122	0.01045
0.01375	0.01639	0.01045								0.01166	0.01122	0.01045
0.01375	0.0165	0.01056								0.01166	0.01122	0.01045
0.01386	0.0165	0.01056								0.01166	0.01133	0.01045
0.01386	0.0165	0.01056								0.01166	0.01144	0.01045
0.01386	0.0165	0.01067								0.01166	0.01144	0.01045
0.01386	0.0165	0.01067								0.01177	0.01144	0.01045
0.01386	0.01661	0.01067								0.01177	0.01144	0.01045
0.01386	0.01661	0.01067								0.01177	0.01144	0.01045
0.01386	0.01661	0.01067								0.01177	0.01144	0.01045
0.01386	0.01661	0.01067								0.01177	0.01144	0.01056
0.01386	0.01661	0.01078								0.01177	0.01144	0.01056
0.01397	0.01661	0.01089								0.01177	0.01155	0.01056
0.01397	0.01661	0.01089								0.01177	0.01155	0.01056
0.01397	0.01661	0.01089								0.01177	0.01155	0.01056
0.01397	0.01672	0.01089								0.01188	0.01155	0.01056
0.01397	0.01672	0.011								0.01188	0.01155	0.01056
0.01408	0.01672	0.011								0.01188	0.01166	0.01056
0.01408	0.01683	0.01111								0.01188	0.01166	0.01056
0.01408	0.01683	0.01111								0.01199	0.01166	0.01056
0.01408	0.01683	0.01111								0.01199	0.01166	0.01056
0.01408	0.01683	0.01111								0.01199	0.01166	0.01067
0.01419	0.01694	0.01111								0.01199	0.01166	0.01067
0.01419	0.01694	0.01111								0.01199	0.01166	0.01067
0.01419	0.01705	0.01122								0.0121	0.01166	0.01067
0.01419	0.01716	0.01122								0.0121	0.01177	0.01067
0.01419	0.01716	0.01122								0.0121	0.01177	0.01067
0.0143	0.01716	0.01133								0.0121	0.01177	0.01067
0.0143	0.01727	0.01133								0.0121	0.01177	0.01067
0.0143	0.01727	0.01133								0.0121	0.01188	0.01067
0.0143	0.01727	0.01133								0.0121	0.01188	0.01078
0.0143	0.01727	0.01133								0.01221	0.01188	0.01078
0.0143	0.01738	0.01133								0.01221	0.01188	0.01078
0.0143	0.01738	0.01144								0.01232	0.01188	0.01078
0.01441	0.01738	0.01144								0.01232	0.01188	0.01089
0.01441	0.01738	0.01144								0.01232	0.01188	0.01089
0.01441	0.01749	0.01144								0.01232	0.01188	0.01089
0.01441	0.01749	0.01144								0.01232	0.01199	0.01089
0.01441	0.01749	0.01155								0.01232	0.01199	0.01089
0.01441	0.01749	0.01155								0.01243	0.01199	0.01089
0.01452	0.01749	0.01155								0.01243	0.01199	0.01089
0.01452	0.01749	0.01155								0.01243	0.01199	0.01089
0.01452	0.0176	0.01155								0.01243	0.01199	0.011
0.01452	0.0176	0.01166								0.01243	0.01199	0.011
0.01452	0.0176	0.01166								0.01243	0.01199	0.01111
0.01452	0.0176	0.01166								0.01243	0.01199	0.01111
0.01452	0.01771	0.01166								0.01243	0.01199	0.01111
0.01452	0.01771	0.01177								0.01243	0.01199	0.01111
0.01463	0.01771	0.01177								0.01243	0.0121	0.01111
0.01463	0.01771	0.01177								0.01254	0.0121	0.01111
0.01463	0.01782	0.01177								0.01254	0.0121	0.01122
0.01463	0.01793	0.01177								0.01254	0.0121	0.01122
0.01463	0.01793	0.01188								0.01254	0.0121	0.01122
0.01463	0.01793	0.01188								0.01254	0.0121	0.01122
0.01463	0.01804	0.01188								0.01265	0.0121	0.01122
0.01474	0.01804	0.01188								0.01265	0.0121	0.01122
0.01474	0.01804	0.01199								0.01265	0.0121	0.01122
0.01474	0.01804	0.01199								0.01265	0.0121	0.01122
0.01474	0.01804	0.01199								0.01265	0.0121	0.01122
0.01485	0.01815	0.01199								0.01265	0.01221	0.01133
0.01485	0.01815	0.01199								0.01265	0.01221	0.01133
0.01485	0.01815	0.0121								0.01265	0.01221	0.01133
0.01485	0.01815	0.0121								0.01265	0.01221	0.01133
0.01496	0.01826	0.0121								0.01276	0.01232	0.01133
0.01496	0.01826	0.0121								0.01276	0.01232	0.01133
0.01507	0.01826	0.0121								0.01276	0.01232	0.01133
0.01507	0.01826	0.01221								0.01276	0.01232	0.01133
0.01507	0.01826	0.01221								0.01276	0.01232	0.01144
0.01507	0.01826	0.01221								0.01276	0.01243	0.01144
0.01507	0.01837	0.01221								0.01276	0.01243	0.01144
0.01507	0.01837	0.01221								0.01276	0.01243	0.01144
0.01507	0.01837	0.01221								0.01276	0.01254	0.01144
0.01507	0.01848	0.01221								0.01276	0.01254	0.01144
0.01518	0.01848	0.01221								0.01287	0.01254	0.01144
0.01529	0.01848	0.01221								0.01287	0.01254	0.01144
0.01529	0.01848	0.01232								0.01287	0.01254	0.01155
0.01529	0.01848	0.01232								0.01287	0.01254	0.01155
0.01529	0.01859	0.01232								0.01287	0.01254	0.01155
0.0154	0.01859	0.01232								0.01298	0.01265	0.01155
0.0154	0.01859	0.01232								0.01298	0.01265	0.01155
0.0154	0.01859	0.01232								0.01298	0.01265	0.01155
0.0154	0.01859	0.01232								0.01298	0.01265	0.01155
0.0154	0.01859	0.01232								0.01309	0.01265	0.01166
0.0154	0.01859	0.01232								0.01309	0.01265	0.01166
0.0154	0.01859	0.01232								0.01309	0.01265	0.01166
0.0154	0.01859	0.01243								0.01309	0.01265	0.01166
0.0154	0.01859	0.01243								0.01309	0.01265	0.01166
0.01551	0.0187	0.01243								0.01309	0.01265	0.01177
0.01551	0.0187	0.01243								0.0132	0.01265	0.01177
0.01551	0.0187	0.01243								0.0132	0.01276	0.01177
0.01551	0.0187	0.01254								0.0132	0.01276	0.01177
0.01562	0.0187	0.01254								0.0132	0.01276	0.01177
0.01562	0.0187	0.01254								0.0132	0.01287	0.01177
0.01562	0.01881	0.01254								0.0132	0.01287	0.01177
0.01562	0.01881	0.01254								0.0132	0.01287	0.01177
0.01562	0.01881	0.01254								0.0132	0.01287	0.01177
0.01562	0.01881	0.01254								0.01331	0.01287	0.01188
0.01573	0.01881	0.01254								0.01331	0.01287	0.01188
0.01573	0.01881	0.01265								0.01342	0.01287	0.01188
0.01573	0.01881	0.01265								0.01342	0.01287	0.01188
0.01573	0.01881	0.01265								0.01342	0.01298	0.01188
0.01573	0.01892	0.01265								0.01342	0.01298	0.01199
0.01573	0.01892	0.01265								0.01342	0.01298	0.01199
0.01573	0.01892	0.01265								0.01342	0.01298	0.01199
0.01573	0.01892	0.01265								0.01342	0.01309	0.01199
0.01584	0.01903	0.01276								0.01353	0.01309	0.01199
0.01584	0.01903	0.01276								0.01353	0.01309	0.01199
0.01584	0.01903	0.01276								0.01353	0.01309	0.0121
0.01584	0.01903	0.01276								0.01353	0.01309	0.0121
0.01584	0.01903	0.01276								0.01353	0.01309	0.0121
0.01584	0.01903	0.01276								0.01353	0.01309	0.0121
0.01584	0.01914	0.01276								0.01353	0.01309	0.0121
0.01584	0.01914	0.01276								0.01364	0.0132	0.0121
0.01584	0.01914	0.01276								0.01364	0.0132	0.0121
0.01584	0.01914	0.01276								0.01364	0.0132	0.0121
0.01595	0.01914	0.01287								0.01364	0.0132	0.0121
0.01595	0.01914	0.01287								0.01364	0.0132	0.0121
0.01595	0.01914	0.01287								0.01364	0.0132	0.01221
0.01595	0.01925	0.01287								0.01364	0.0132	0.01221
0.01595	0.01925	0.01298								0.01364	0.01331	0.01221
0.01595	0.01925	0.01298								0.01364	0.01331	0.01221
0.01595	0.01925	0.01298								0.01375	0.01331	0.01221
0.01595	0.01925	0.01298								0.01386	0.01331	0.01221
0.01595	0.01936	0.01298								0.01386	0.01331	0.01221
0.01595	0.01936	0.01298								0.01386	0.01331	0.01221
0.01606	0.01936	0.01298								0.01386	0.01342	0.01232
0.01606	0.01936	0.01298								0.01397	0.01342	0.01232
0.01606	0.01947	0.01298								0.01397	0.01342	0.01232
0.01606	0.01947	0.01298								0.01397	0.01342	0.01232
0.01606	0.01947	0.01298								0.01397	0.01342	0.01232
0.01606	0.01947	0.01298								0.01397	0.01342	0.01232
0.01617	0.01958	0.01298								0.01397	0.01353	0.01232
0.01617	0.01958	0.01298								0.01397	0.01353	0.01232
0.01617	0.01958	0.01298								0.01397	0.01353	0.01232
0.01617	0.01958	0.01298								0.01397	0.01353	0.01243
0.01617	0.01958	0.01298								0.01397	0.01353	0.01243
0.01617	0.01958	0.01309								0.01408	0.01353	0.01243
0.01617	0.01958	0.01309								0.01408	0.01364	0.01243
0.01628	0.01969	0.01309								0.01408	0.01364	0.01243
0.01628	0.01969	0.01309								0.01408	0.01364	0.01243
0.01628	0.01969	0.01309								0.01408	0.01364	0.01243
0.01628	0.0198	0.0132								0.01419	0.01364	0.01254
0.01628	0.0198	0.0132								0.01419	0.01364	0.01254
0.01628	0.0198	0.0132								0.01419	0.01364	0.01254
0.01628	0.01991	0.0132								0.01419	0.01375	0.01254
0.01628	0.01991	0.0132								0.01419	0.01375	0.01254
0.01639	0.01991	0.0132								0.0143	0.01375	0.01265
0.01639	0.02002	0.0132								0.0143	0.01375	0.01265
0.0165	0.02002	0.0132								0.0143	0.01375	0.01265
0.0165	0.02002	0.0132								0.0143	0.01375	0.01265
0.0165	0.02002	0.0132								0.0143	0.01375	0.01265
0.0165	0.02002	0.0132								0.0143	0.01375	0.01265
0.0165	0.02002	0.01331								0.0143	0.01375	0.01265
0.0165	0.02002	0.01331								0.0143	0.01386	0.01265
0.0165	0.02002	0.01331								0.0143	0.01386	0.01276
0.0165	0.02002	0.01331								0.0143	0.01386	0.01276
0.0165	0.02002	0.01331								0.0143	0.01386	0.01276
0.0165	0.02002	0.01342								0.0143	0.01386	0.01276
0.0165	0.02013	0.01342								0.01441	0.01386	0.01276
0.01661	0.02013	0.01342								0.01441	0.01386	0.01276
0.01661	0.02013	0.01342								0.01441	0.01386	0.01276
0.01661	0.02024	0.01342								0.01441	0.01386	0.01276
0.01661	0.02024	0.01342								0.01441	0.01386	0.01287
0.01661	0.02024	0.01342								0.01441	0.01397	0.01287
0.01661	0.02024	0.01342								0.01441	0.01397	0.01287
0.01661	0.02024	0.01353								0.01441	0.01397	0.01287
0.01672	0.02024	0.01353								0.01441	0.01397	0.01287
0.01672	0.02035	0.01353								0.01441	0.01397	0.01287
0.01672	0.02035	0.01353								0.01441	0.01397	0.01287
0.01672	0.02035	0.01353								0.01452	0.01397	0.01298
0.01672	0.02035	0.01353								0.01452	0.01397	0.01298
0.01672	0.02035	0.01353								0.01452	0.01408	0.01298
0.01672	0.02035	0.01364								0.01452	0.01408	0.01298
0.01672	0.02046	0.01364								0.01452	0.01408	0.01298
0.01672	0.02046	0.01364								0.01452	0.01408	0.01298
0.01672	0.02046	0.01364								0.01452	0.01408	0.01298
0.01672	0.02046	0.01364								0.01463	0.01408	0.01298
0.01672	0.02046	0.01364								0.01463	0.01408	0.01298
0.01683	0.02046	0.01364								0.01463	0.01408	0.01298
0.01683	0.02046	0.01364								0.01474	0.01408	0.01298
0.01694	0.02046	0.01364								0.01474	0.01408	0.01298
0.01694	0.02046	0.01364								0.01474	0.01419	0.01309
0.01694	0.02046	0.01364								0.01474	0.01419	0.01309
0.01705	0.02046	0.01364								0.01474	0.01419	0.01309
0.01705	0.02057	0.01364								0.01474	0.01419	0.01309
0.01705	0.02057	0.01364								0.01474	0.01419	0.01309
0.01705	0.02057	0.01364								0.01474	0.01419	0.01309
0.01705	0.02057	0.01375								0.01474	0.01419	0.01309
0.01716	0.02057	0.01375								0.01474	0.0143	0.0132
0.01716	0.02057	0.01375								0.01485	0.0143	0.0132
0.01716	0.02057	0.01375								0.01485	0.0143	0.0132
0.01716	0.02057	0.01375								0.01485	0.0143	0.0132
0.01716	0.02068	0.01386								0.01485	0.0143	0.0132
0.01716	0.02068	0.01386								0.01485	0.0143	0.01331
0.01716	0.02068	0.01386								0.01485	0.0143	0.01331
0.01716	0.02068	0.01386								0.01496	0.0143	0.01331
0.01727	0.02068	0.01386								0.01496	0.0143	0.01331
0.01727	0.02079	0.01386								0.01507	0.01441	0.01331
0.01727	0.02079	0.01386								0.01507	0.01441	0.01331
0.01727	0.02079	0.01397								0.01507	0.01441	0.01331
0.01727	0.0209	0.01397								0.01507	0.01441	0.01331
0.01727	0.0209	0.01397								0.01507	0.01441	0.01342
0.01727	0.0209	0.01397								0.01507	0.01452	0.01342
0.01738	0.0209	0.01397								0.01507	0.01452	0.01342
0.01738	0.0209	0.01397								0.01507	0.01452	0.01342
0.01738	0.0209	0.01408								0.01507	0.01452	0.01342
0.01738	0.0209	0.01408								0.01507	0.01452	0.01342
0.01738	0.0209	0.01408								0.01507	0.01452	0.01342
0.01738	0.0209	0.01408								0.01507	0.01452	0.01342
0.01738	0.0209	0.01408								0.01507	0.01463	0.01342
0.01749	0.02101	0.01408								0.01518	0.01463	0.01342
0.01749	0.02101	0.01408								0.01518	0.01463	0.01353
0.01749	0.02101	0.01408								0.01518	0.01474	0.01353
0.01749	0.02101	0.01408								0.01518	0.01474	0.01353
0.01749	0.02112	0.01419								0.01518	0.01474	0.01353
0.01749	0.02112	0.01419								0.01518	0.01474	0.01353
0.01749	0.02112	0.01419								0.01518	0.01474	0.01353
0.0176	0.02112	0.01419								0.01518	0.01474	0.01353
0.0176	0.02112	0.01419								0.01518	0.01474	0.01353
0.0176	0.02112	0.0143								0.01518	0.01474	0.01353
0.0176	0.02112	0.0143								0.01518	0.01474	0.01364
0.0176	0.02112	0.0143								0.01529	0.01485	0.01364
0.0176	0.02112	0.0143								0.01529	0.01485	0.01364
0.0176	0.02112	0.0143								0.01529	0.01485	0.01364
0.01771	0.02123	0.0143								0.01529	0.01485	0.01375
0.01771	0.02123	0.0143								0.01529	0.01485	0.01375
0.01771	0.02123	0.0143								0.01529	0.01485	0.01375
0.01771	0.02123	0.0143								0.01529	0.01485	0.01375
0.01771	0.02123	0.0143								0.0154	0.01485	0.01375
0.01771	0.02134	0.0143								0.0154	0.01485	0.01375
0.01782	0.02134	0.0143								0.0154	0.01485	0.01386
0.01782	0.02134	0.0143								0.01551	0.01485	0.01386
0.01782	0.02134	0.0143								0.01551	0.01485	0.01386
0.01782	0.02134	0.0143								0.01551	0.01496	0.01386
0.01782	0.02134	0.01441								0.01551	0.01496	0.01386
0.01782	0.02145	0.01441								0.01551	0.01496	0.01386
0.01782	0.02145	0.01441								0.01551	0.01496	0.01386
0.01782	0.02145	0.01452								0.01551	0.01507	0.01386
0.01782	0.02145	0.01452								0.01551	0.01507	0.01386
0.01782	0.02145	0.01452								0.01551	0.01507	0.01386
0.01782	0.02145	0.01452								0.01551	0.01507	0.01386
0.01793	0.02145	0.01452								0.01551	0.01507	0.01386
0.01793	0.02145	0.01463								0.01562	0.01507	0.01397
0.01793	0.02145	0.01463								0.01562	0.01507	0.01397
0.01793	0.02145	0.01463								0.01562	0.01518	0.01397
0.01793	0.02145	0.01463								0.01562	0.01518	0.01397
0.01793	0.02156	0.01463								0.01562	0.01518	0.01397
0.01793	0.02156	0.01463								0.01562	0.01518	0.01397
0.01804	0.02156	0.01463								0.01562	0.01518	0.01397
0.01804	0.02156	0.01463								0.01573	0.01518	0.01397
0.01804	0.02156	0.01463								0.01573	0.01529	0.01397
0.01804	0.02167	0.01463								0.01573	0.01529	0.01408
0.01804	0.02167	0.01463								0.01573	0.01529	0.01408
0.01804	0.02167	0.01463								0.01573	0.01529	0.01408
0.01804	0.02167	0.01463								0.01573	0.0154	0.01408
0.01804	0.02167	0.01463								0.01584	0.0154	0.01408
0.01804	0.02167	0.01474								0.01584	0.0154	0.01408
0.01804	0.02167	0.01474								0.01584	0.0154	0.01419
0.01804	0.02178	0.01474								0.01584	0.0154	0.01419
0.01815	0.02178	0.01474								0.01584	0.0154	0.01419
0.01815	0.02178	0.01474								0.01595	0.0154	0.01419
0.01815	0.02178	0.01474								0.01595	0.0154	0.01419
0.01815	0.02178	0.01474								0.01595	0.01551	0.01419
0.01815	0.02178	0.01474								0.01595	0.01551	0.01419
0.01815	0.02178	0.01474								0.01595	0.01551	0.01419
0.01815	0.02178	0.01485								0.01595	0.01551	0.01419
0.01815	0.02189	0.01485								0.01595	0.01551	0.01419
0.01815	0.02189	0.01485								0.01595	0.01551	0.01419
0.01826	0.02189	0.01485								0.01606	0.01562	0.0143
0.01826	0.02189	0.01485								0.01606	0.01562	0.0143
0.01826	0.02189	0.01485								0.01606	0.01562	0.0143
0.01837	0.02189	0.01485								0.01606	0.01573	0.0143
0.01837	0.02189	0.01496								0.01606	0.01573	0.0143
0.01837	0.02189	0.01496								0.01617	0.01573	0.0143
0.01837	0.022	0.01496								0.01617	0.01573	0.0143
0.01837	0.022	0.01496								0.01617	0.01573	0.0143
0.01837	0.022	0.01496								0.01617	0.01573	0.0143
0.01837	0.022	0.01496								0.01617	0.01584	0.01441
0.01837	0.022	0.01496								0.01617	0.01584	0.01441
0.01837	0.02211	0.01507								0.01617	0.01584	0.01441
0.01837	0.02211	0.01507								0.01617	0.01584	0.01441
0.01848	0.02211	0.01507								0.01628	0.01584	0.01441
0.01848	0.02222	0.01507								0.01628	0.01584	0.01441
0.01848	0.02222	0.01507								0.01628	0.01584	0.01441
0.01848	0.02222	0.01507								0.01628	0.01584	0.01441
0.01848	0.02222	0.01507								0.01628	0.01595	0.01441
0.01848	0.02222	0.01507								0.01628	0.01595	0.01441
0.01859	0.02222	0.01518								0.01628	0.01595	0.01441
0.01859	0.02222	0.01518								0.01639	0.01595	0.01452
0.01859	0.02233	0.01518								0.01639	0.01595	0.01452
0.01859	0.02233	0.01518								0.01639	0.01595	0.01452
0.01859	0.02233	0.01518								0.01639	0.01595	0.01452
0.01859	0.02233	0.01518								0.01639	0.01595	0.01452
0.01859	0.02233	0.01518								0.01639	0.01595	0.01452
0.01859	0.02233	0.01529								0.01639	0.01595	0.01452
0.01859	0.02233	0.01529								0.01639	0.01595	0.01452
0.01859	0.02233	0.01529								0.01639	0.01606	0.01452
0.0187	0.02244	0.01529								0.01639	0.01606	0.01452
0.0187	0.02244	0.01529								0.01639	0.01606	0.01463
0.0187	0.02244	0.01529								0.0165	0.01606	0.01463
0.0187	0.02244	0.01529								0.0165	0.01606	0.01463
0.0187	0.02244	0.01529								0.0165	0.01606	0.01463
0.0187	0.02244	0.01529								0.0165	0.01606	0.01463
0.01881	0.02244	0.01529								0.01661	0.01606	0.01463
0.01881	0.02244	0.01529								0.01661	0.01617	0.01463
0.01881	0.02244	0.0154								0.01661	0.01617	0.01474
0.01881	0.02255	0.0154								0.01661	0.01617	0.01474
0.01881	0.02255	0.0154								0.01661	0.01617	0.01474
0.01881	0.02255	0.0154								0.01661	0.01617	0.01474
0.01881	0.02255	0.0154								0.01672	0.01617	0.01474
0.01881	0.02255	0.0154								0.01672	0.01617	0.01474
0.01881	0.02255	0.0154								0.01672	0.01617	0.01474
0.01881	0.02255	0.0154								0.01672	0.01617	0.01474
0.01892	0.02255	0.0154								0.01672	0.01617	0.01474
0.01892	0.02266	0.01551								0.01672	0.01628	0.01474
0.01892	0.02266	0.01551								0.01672	0.01628	0.01474
0.01892	0.02266	0.01562								0.01672	0.01628	0.01474
0.01892	0.02266	0.01562								0.01672	0.01628	0.01474
0.01892	0.02266	0.01562								0.01672	0.01628	0.01485
0.01892	0.02266	0.01562								0.01672	0.01628	0.01485
0.01892	0.02266	0.01562								0.01683	0.01639	0.01485
0.01892	0.02266	0.01562								0.01683	0.01639	0.01485
0.01892	0.02266	0.01562								0.01683	0.01639	0.01485
0.01892	0.02266	0.01562								0.01683	0.01639	0.01485
0.01892	0.02266	0.01573								0.01683	0.01639	0.01485
0.01892	0.02266	0.01573								0.01683	0.0165	0.01485
0.01903	0.02277	0.01573								0.01683	0.0165	0.01485
0.01903	0.02277	0.01573								0.01694	0.0165	0.01485
0.01903	0.02277	0.01573								0.01694	0.0165	0.01485
0.01903	0.02277	0.01573								0.01694	0.0165	0.01496
0.01903	0.02277	0.01573								0.01694	0.0165	0.01496
0.01903	0.02277	0.01573								0.01694	0.0165	0.01496
0.01903	0.02288	0.01584								0.01705	0.0165	0.01496
0.01903	0.02288	0.01584								0.01705	0.0165	0.01496
0.01903	0.02288	0.01584								0.01705	0.0165	0.01496
0.01914	0.02299	0.01584								0.01705	0.01661	0.01496
0.01914	0.02299	0.01584								0.01716	0.01661	0.01496
0.01914	0.02299	0.01584								0.01716	0.01661	0.01507
0.01914	0.02299	0.01584								0.01716	0.01661	0.01507
0.01914	0.0231	0.01584								0.01716	0.01661	0.01507
0.01914	0.0231	0.01584								0.01716	0.01661	0.01507
0.01925	0.0231	0.01584								0.01716	0.01661	0.01507
0.01925	0.0231	0.01584								0.01716	0.01661	0.01518
0.01925	0.0231	0.01584								0.01727	0.01661	0.01518
0.01925	0.0231	0.01584								0.01727	0.01661	0.01518
0.01925	0.02321	0.01595								0.01727	0.01661	0.01518
0.01925	0.02321	0.01595								0.01727	0.01672	0.01518
0.01925	0.02321	0.01595								0.01727	0.01672	0.01518
0.01936	0.02321	0.01595								0.01727	0.01672	0.01518
0.01936	0.02321	0.01595								0.01738	0.01672	0.01518
0.01936	0.02321	0.01595								0.01738	0.01672	0.01529
0.01936	0.02321	0.01595								0.01738	0.01672	0.01529
0.01936	0.02321	0.01595								0.01738	0.01672	0.01529
0.01936	0.02321	0.01595								0.01738	0.01672	0.01529
0.01936	0.02332	0.01595								0.01738	0.01672	0.01529
0.01936	0.02332	0.01595								0.01738	0.01683	0.01529
0.01936	0.02332	0.01595								0.01738	0.01683	0.01529
0.01947	0.02332	0.01606								0.01738	0.01683	0.01529
0.01947	0.02343	0.01606								0.01749	0.01683	0.01529
0.01947	0.02343	0.01606								0.01749	0.01683	0.01529
0.01947	0.02343	0.01606								0.01749	0.01683	0.0154
0.01947	0.02343	0.01606								0.01749	0.01683	0.0154
0.01947	0.02343	0.01606								0.01749	0.01683	0.0154
0.01958	0.02343	0.01617								0.01749	0.01683	0.0154
0.01958	0.02354	0.01617								0.01749	0.01694	0.0154
0.01958	0.02354	0.01617								0.01749	0.01694	0.0154
0.01958	0.02354	0.01617								0.01749	0.01694	0.0154
0.01958	0.02354	0.01617								0.01749	0.01694	0.0154
0.01958	0.02365	0.01617								0.01749	0.01694	0.0154
0.01969	0.02365	0.01628								0.0176	0.01694	0.0154
0.01969	0.02365	0.01628								0.0176	0.01694	0.01551
0.01969	0.02365	0.01628								0.0176	0.01694	0.01551
0.01969	0.02365	0.01628								0.0176	0.01705	0.01551
0.01969	0.02365	0.01628								0.0176	0.01705	0.01551
0.01969	0.02376	0.01628								0.01771	0.01705	0.01551
0.01969	0.02376	0.01628								0.01771	0.01705	0.01551
0.01969	0.02376	0.01628								0.01771	0.01705	0.01551
0.01969	0.02376	0.01628								0.01771	0.01705	0.01551
0.0198	0.02376	0.01628								0.01771	0.01705	0.01551
0.0198	0.02376	0.01628								0.01771	0.01716	0.01551
0.0198	0.02387	0.01628								0.01771	0.01716	0.01551
0.0198	0.02387	0.01628								0.01771	0.01716	0.01551
0.0198	0.02387	0.01639								0.01782	0.01716	0.01551
0.0198	0.02398	0.01639								0.01782	0.01716	0.01562
0.0198	0.02398	0.01639								0.01782	0.01716	0.01562
0.01991	0.02398	0.01639								0.01782	0.01716	0.01562
0.01991	0.02398	0.01639								0.01782	0.01716	0.01562
0.01991	0.02398	0.01639								0.01782	0.01716	0.01562
0.01991	0.02409	0.01639								0.01782	0.01727	0.01562
0.01991	0.02409	0.01639								0.01782	0.01727	0.01562
0.01991	0.02409	0.01639								0.01782	0.01727	0.01562
0.01991	0.02409	0.01639								0.01782	0.01727	0.01562
0.01991	0.02409	0.01639								0.01793	0.01727	0.01562
0.01991	0.02409	0.01639								0.01793	0.01727	0.01562
0.02002	0.02409	0.01639								0.01793	0.01727	0.01562
0.02002	0.02409	0.0165								0.01793	0.01738	0.01562
0.02002	0.02409	0.0165								0.01793	0.01738	0.01562
0.02002	0.02409	0.0165								0.01793	0.01738	0.01573
0.02002	0.0242	0.0165								0.01793	0.01738	0.01573
0.02002	0.0242	0.0165								0.01793	0.01738	0.01573
0.02002	0.0242	0.0165								0.01804	0.01738	0.01573
0.02002	0.0242	0.0165								0.01804	0.01738	0.01573
0.02002	0.02431	0.0165								0.01804	0.01738	0.01584
0.02013	0.02431	0.01661								0.01804	0.01738	0.01584
0.02013	0.02431	0.01661								0.01804	0.01738	0.01584
0.02013	0.02431	0.01661								0.01804	0.01738	0.01584
0.02013	0.02431	0.01661								0.01804	0.01738	0.01584
0.02013	0.02442	0.01661								0.01804	0.01738	0.01584
0.02013	0.02442	0.01661								0.01804	0.01738	0.01584
0.02024	0.02442	0.01661								0.01804	0.01738	0.01584
0.02024	0.02442	0.01661								0.01804	0.01749	0.01584
0.02024	0.02442	0.01661								0.01804	0.01749	0.01584
0.02024	0.02442	0.01661								0.01815	0.01749	0.01584
0.02024	0.02453	0.01661								0.01815	0.01749	0.01584
0.02024	0.02453	0.01661								0.01815	0.0176	0.01595
0.02024	0.02453	0.01661								0.01815	0.0176	0.01595
0.02035	0.02453	0.01672								0.01815	0.0176	0.01595
0.02035	0.02453	0.01672								0.01815	0.0176	0.01595
0.02035	0.02453	0.01672								0.01815	0.0176	0.01595
0.02035	0.02464	0.01672								0.01815	0.0176	0.01595
0.02035	0.02464	0.01672								0.01826	0.0176	0.01595
0.02035	0.02464	0.01672								0.01826	0.0176	0.01595
0.02035	0.02464	0.01672								0.01826	0.01771	0.01595
0.02046	0.02464	0.01672								0.01826	0.01771	0.01595
0.02046	0.02464	0.01672								0.01826	0.01771	0.01595
0.02046	0.02475	0.01683								0.01826	0.01771	0.01606
0.02046	0.02475	0.01683								0.01826	0.01771	0.01606
0.02046	0.02475	0.01683								0.01826	0.01771	0.01606
0.02046	0.02475	0.01683								0.01837	0.01771	0.01606
0.02046	0.02475	0.01683								0.01837	0.01782	0.01606
0.02046	0.02486	0.01683								0.01837	0.01782	0.01606
0.02046	0.02486	0.01683								0.01837	0.01782	0.01606
0.02057	0.02486	0.01683								0.01837	0.01782	0.01617
0.02057	0.02486	0.01683								0.01837	0.01782	0.01617
0.02057	0.02486	0.01683								0.01837	0.01782	0.01617
0.02057	0.02486	0.01683								0.01837	0.01782	0.01617
0.02057	0.02497	0.01683								0.01848	0.01782	0.01617
0.02057	0.02497	0.01694								0.01848	0.01793	0.01617
0.02057	0.02497	0.01694								0.01848	0.01793	0.01617
0.02057	0.02497	0.01694								0.01848	0.01793	0.01617
0.02057	0.02497	0.01694								0.01848	0.01793	0.01617
0.02057	0.02497	0.01694								0.01848	0.01793	0.01617
0.02057	0.02497	0.01694								0.01848	0.01793	0.01617
0.02057	0.02497	0.01694								0.01848	0.01793	0.01617
0.02057	0.02508	0.01694								0.01848	0.01793	0.01617
0.02057	0.02508	0.01694								0.01848	0.01793	0.01617
0.02057	0.02508	0.01694								0.01859	0.01793	0.01617
0.02057	0.02508	0.01705								0.01859	0.01793	0.01617
0.02068	0.02508	0.01705								0.01859	0.01793	0.01628
0.02068	0.02508	0.01705								0.01859	0.01793	0.01628
0.02068	0.02508	0.01705								0.01859	0.01804	0.01628
0.02068	0.02519	0.01705								0.01859	0.01804	0.01628
0.02068	0.02519	0.01705								0.0187	0.01804	0.01628
0.02068	0.02519	0.01705								0.0187	0.01804	0.01628
0.02068	0.02519	0.01705								0.0187	0.01804	0.01628
0.02068	0.02519	0.01705								0.0187	0.01804	0.01628
0.02079	0.02519	0.01705								0.0187	0.01804	0.01628
0.02079	0.02519	0.01716								0.0187	0.01804	0.01628
0.02079	0.02519	0.01716								0.0187	0.01804	0.01628
0.0209	0.02519	0.01716								0.01881	0.01804	0.01639
0.0209	0.02519	0.01716								0.01881	0.01815	0.01639
0.0209	0.02519	0.01716								0.01881	0.01815	0.01639
0.0209	0.0253	0.01716								0.01881	0.01815	0.01639
0.0209	0.02541	0.01716								0.01881	0.01815	0.01639
0.0209	0.02541	0.01716								0.01881	0.01815	0.01639
0.02101	0.02541	0.01716								0.01881	0.01815	0.01639
0.02101	0.02541	0.01716								0.01881	0.01815	0.01639
0.02101	0.02541	0.01716								0.01881	0.01826	0.01639
0.02101	0.02541	0.01727								0.01881	0.01826	0.01639
0.02112	0.02552	0.01727								0.01881	0.01826	0.01639
0.02112	0.02552	0.01727								0.01881	0.01826	0.01639
0.02112	0.02552	0.01727								0.01892	0.01826	0.01639
0.02112	0.02552	0.01727								0.01892	0.01826	0.0165
0.02112	0.02552	0.01727								0.01892	0.01837	0.0165
0.02112	0.02552	0.01738								0.01892	0.01837	0.0165
0.02112	0.02552	0.01738								0.01892	0.01837	0.0165
0.02112	0.02552	0.01738								0.01903	0.01837	0.0165
0.02112	0.02552	0.01738								0.01903	0.01837	0.0165
0.02123	0.02552	0.01738								0.01903	0.01837	0.0165
0.02123	0.02563	0.01738								0.01903	0.01837	0.0165
0.02123	0.02563	0.01738								0.01903	0.01837	0.0165
0.02123	0.02563	0.01749								0.01903	0.01837	0.0165
0.02123	0.02563	0.01749								0.01903	0.01837	0.0165
0.02123	0.02563	0.01749								0.01903	0.01848	0.0165
0.02134	0.02563	0.01749								0.01903	0.01848	0.0165
0.02134	0.02563	0.01749								0.01903	0.01848	0.0165
0.02134	0.02563	0.01749								0.01903	0.01848	0.0165
0.02134	0.02574	0.0176								0.01914	0.01848	0.0165
0.02134	0.02574	0.0176								0.01914	0.01848	0.0165
0.02134	0.02574	0.0176								0.01914	0.01859	0.01661
0.02145	0.02574	0.0176								0.01914	0.01859	0.01661
0.02145	0.02585	0.0176								0.01914	0.01859	0.01661
0.02145	0.02585	0.0176								0.01914	0.01859	0.01661
0.02145	0.02585	0.0176								0.01914	0.01859	0.01661
0.02145	0.02585	0.0176								0.01914	0.01859	0.01661
0.02145	0.02585	0.01771								0.01925	0.01859	0.01661
0.02145	0.02585	0.01771								0.01925	0.0187	0.01661
0.02145	0.02585	0.01771								0.01925	0.0187	0.01661
0.02145	0.02585	0.01771								0.01925	0.0187	0.01661
0.02145	0.02585	0.01771								0.01925	0.0187	0.01661
0.02145	0.02585	0.01771								0.01925	0.0187	0.01672
0.02156	0.02585	0.01782								0.01925	0.0187	0.01672
0.02156	0.02596	0.01782								0.01925	0.0187	0.01672
0.02156	0.02596	0.01782								0.01925	0.0187	0.01672
0.02156	0.02596	0.01782								0.01925	0.0187	0.01672
0.02156	0.02596	0.01782								0.01925	0.0187	0.01672
0.02156	0.02596	0.01782								0.01925	0.0187	0.01672
0.02156	0.02607	0.01782								0.01925	0.0187	0.01672
0.02156	0.02607	0.01782								0.01925	0.0187	0.01672
0.02167	0.02607	0.01782								0.01936	0.0187	0.01683
0.02167	0.02607	0.01782								0.01936	0.01881	0.01683
0.02167	0.02618	0.01793								0.01936	0.01881	0.01683
0.02167	0.02618	0.01793								0.01936	0.01881	0.01683
0.02167	0.02618	0.01793								0.01936	0.01881	0.01683
0.02167	0.02618	0.01793								0.01936	0.01881	0.01683
0.02167	0.02629	0.01793								0.01936	0.01881	0.01683
0.02167	0.02629	0.01793								0.01936	0.01881	0.01683
0.02167	0.02629	0.01793								0.01947	0.01881	0.01683
0.02178	0.02629	0.01793								0.01947	0.01881	0.01683
0.02178	0.02629	0.01793								0.01947	0.01881	0.01683
0.02178	0.02629	0.01793								0.01958	0.01881	0.01694
0.02178	0.02629	0.01793								0.01958	0.01892	0.01694
0.02178	0.0264	0.01804								0.01958	0.01892	0.01694
0.02178	0.0264	0.01804								0.01958	0.01892	0.01694
0.02178	0.0264	0.01804								0.01958	0.01892	0.01694
0.02178	0.0264	0.01804								0.01958	0.01892	0.01694
0.02178	0.0264	0.01804								0.01958	0.01892	0.01694
0.02178	0.0264	0.01804								0.01958	0.01892	0.01694
0.02178	0.0264	0.01804								0.01958	0.01892	0.01694
0.02189	0.0264	0.01804								0.01969	0.01892	0.01694
0.02189	0.02651	0.01804								0.01969	0.01892	0.01694
0.02189	0.02651	0.01804								0.01969	0.01903	0.01694
0.02189	0.02651	0.01804								0.01969	0.01903	0.01694
0.02189	0.02651	0.01804								0.01969	0.01903	0.01694
0.02189	0.02651	0.01815								0.01969	0.01903	0.01705
0.022	0.02662	0.01815								0.01969	0.01903	0.01705
0.022	0.02662	0.01815								0.0198	0.01903	0.01705
0.022	0.02662	0.01815								0.0198	0.01903	0.01705
0.022	0.02662	0.01815								0.0198	0.01903	0.01705
0.022	0.02662	0.01815								0.0198	0.01903	0.01705
0.022	0.02662	0.01815								0.0198	0.01903	0.01705
0.022	0.02662	0.01826								0.0198	0.01903	0.01705
0.022	0.02662	0.01826								0.0198	0.01903	0.01705
0.02211	0.02662	0.01826								0.0198	0.01903	0.01705
0.02211	0.02662	0.01826								0.0198	0.01914	0.01716
0.02211	0.02673	0.01826								0.01991	0.01914	0.01716
0.02211	0.02673	0.01826								0.01991	0.01914	0.01716
0.02211	0.02673	0.01826								0.01991	0.01914	0.01716
0.02211	0.02673	0.01837								0.01991	0.01914	0.01716
0.02211	0.02673	0.01837								0.01991	0.01925	0.01716
0.02211	0.02673	0.01837								0.01991	0.01925	0.01716
0.02222	0.02684	0.01837								0.02002	0.01925	0.01716
0.02222	0.02684	0.01837								0.02002	0.01925	0.01716
0.02222	0.02684	0.01848								0.02002	0.01925	0.01716
0.02222	0.02684	0.01848								0.02002	0.01925	0.01716
0.02222	0.02684	0.01848								0.02002	0.01925	0.01716
0.02222	0.02684	0.01848								0.02002	0.01925	0.01716
0.02222	0.02684	0.01848								0.02013	0.01925	0.01727
0.02222	0.02684	0.01848								0.02013	0.01936	0.01727
0.02233	0.02684	0.01848								0.02013	0.01936	0.01727
0.02233	0.02684	0.01848								0.02013	0.01936	0.01727
0.02233	0.02684	0.01859								0.02013	0.01936	0.01727
0.02233	0.02684	0.01859								0.02024	0.01936	0.01727
0.02233	0.02695	0.01859								0.02024	0.01936	0.01727
0.02233	0.02695	0.01859								0.02024	0.01936	0.01727
0.02233	0.02695	0.01859								0.02024	0.01936	0.01727
0.02244	0.02695	0.01859								0.02024	0.01947	0.01738
0.02244	0.02695	0.01859								0.02024	0.01947	0.01738
0.02244	0.02695	0.01859								0.02024	0.01947	0.01738
0.02244	0.02706	0.0187								0.02024	0.01947	0.01738
0.02244	0.02706	0.0187								0.02024	0.01947	0.01738
0.02255	0.02706	0.0187								0.02024	0.01947	0.01738
0.02255	0.02706	0.0187								0.02024	0.01947	0.01738
0.02255	0.02706	0.0187								0.02024	0.01947	0.01738
0.02255	0.02706	0.0187								0.02024	0.01947	0.01738
0.02255	0.02706	0.0187								0.02035	0.01947	0.01738
0.02255	0.02706	0.0187								0.02035	0.01947	0.01738
0.02255	0.02706	0.01881								0.02035	0.01958	0.01738
0.02255	0.02706	0.01881								0.02035	0.01958	0.01738
0.02255	0.02706	0.01881								0.02035	0.01958	0.01738
0.02266	0.02706	0.01881								0.02035	0.01958	0.01738
0.02266	0.02717	0.01881								0.02035	0.01958	0.01738
0.02266	0.02717	0.01881								0.02046	0.01958	0.01738
0.02266	0.02717	0.01881								0.02046	0.01958	0.01738
0.02266	0.02717	0.01881								0.02046	0.01958	0.01738
0.02277	0.02717	0.01881								0.02046	0.01958	0.01749
0.02277	0.02717	0.01881								0.02046	0.01958	0.01749
0.02277	0.02717	0.01881								0.02046	0.01969	0.01749
0.02277	0.02717	0.01892								0.02046	0.01969	0.01749
0.02277	0.02717	0.01892								0.02057	0.01969	0.01749
0.02288	0.02728	0.01892								0.02057	0.01969	0.01749
0.02288	0.02728	0.01892								0.02057	0.01969	0.01749
0.02288	0.02728	0.01892								0.02057	0.01969	0.01749
0.02288	0.02728	0.01892								0.02057	0.01969	0.0176
0.02288	0.02728	0.01892								0.02057	0.01969	0.0176
0.02288	0.02728	0.01903								0.02057	0.01969	0.0176
0.02299	0.02728	0.01903								0.02057	0.01969	0.0176
0.02299	0.02728	0.01903								0.02068	0.0198	0.0176
0.02299	0.02739	0.01903								0.02068	0.0198	0.0176
0.02299	0.02739	0.01903								0.02068	0.0198	0.0176
0.02299	0.02739	0.01903								0.02068	0.0198	0.0176
0.02299	0.02739	0.01903								0.02068	0.0198	0.0176
0.02299	0.02739	0.01903								0.02068	0.0198	0.01771
0.02299	0.02739	0.01903								0.02068	0.0198	0.01771
0.02299	0.02739	0.01903								0.02079	0.0198	0.01771
0.0231	0.02739	0.01903								0.02079	0.0198	0.01771
0.0231	0.02739	0.01903								0.02079	0.0198	0.01771
0.0231	0.02739	0.01914								0.02079	0.0198	0.01771
0.0231	0.0275	0.01914								0.0209	0.01991	0.01771
0.0231	0.0275	0.01914								0.0209	0.01991	0.01771
0.02321	0.0275	0.01914								0.0209	0.01991	0.01782
0.02321	0.0275	0.01914								0.0209	0.01991	0.01782
0.02321	0.0275	0.01914								0.0209	0.01991	0.01782
0.02321	0.0275	0.01914								0.0209	0.02002	0.01782
0.02321	0.02761	0.01914								0.0209	0.02002	0.01782
0.02332	0.02761	0.01914								0.0209	0.02002	0.01782
0.02332	0.02761	0.01914								0.0209	0.02002	0.01782
0.02332	0.02761	0.01914								0.02101	0.02002	0.01782
0.02332	0.02761	0.01914								0.02101	0.02002	0.01782
0.02332	0.02772	0.01914								0.02101	0.02002	0.01793
0.02332	0.02772	0.01925								0.02101	0.02002	0.01793
0.02332	0.02772	0.01925								0.02101	0.02002	0.01793
0.02332	0.02772	0.01925								0.02101	0.02013	0.01793
0.02332	0.02772	0.01925								0.02101	0.02013	0.01793
0.02332	0.02772	0.01925								0.02101	0.02013	0.01793
0.02332	0.02772	0.01925								0.02101	0.02013	0.01793
0.02332	0.02772	0.01936								0.02101	0.02013	0.01793
0.02332	0.02783	0.01936								0.02101	0.02013	0.01793
0.02343	0.02783	0.01936								0.02101	0.02013	0.01793
0.02343	0.02783	0.01936								0.02112	0.02013	0.01793
0.02343	0.02783	0.01936								0.02112	0.02013	0.01793
0.02343	0.02783	0.01936								0.02112	0.02024	0.01793
0.02343	0.02783	0.01936								0.02112	0.02024	0.01793
0.02343	0.02783	0.01936								0.02112	0.02024	0.01793
0.02343	0.02794	0.01936								0.02112	0.02024	0.01804
0.02343	0.02794	0.01936								0.02112	0.02024	0.01804
0.02343	0.02794	0.01936								0.02112	0.02024	0.01804
0.02354	0.02794	0.01936								0.02112	0.02024	0.01804
0.02354	0.02805	0.01936								0.02112	0.02024	0.01804
0.02354	0.02805	0.01936								0.02112	0.02035	0.01804
0.02354	0.02805	0.01936								0.02112	0.02035	0.01804
0.02354	0.02816	0.01947								0.02123	0.02035	0.01804
0.02354	0.02816	0.01947								0.02123	0.02035	0.01804
0.02354	0.02816	0.01947								0.02123	0.02035	0.01804
0.02354	0.02816	0.01947								0.02123	0.02035	0.01804
0.02365	0.02816	0.01947								0.02123	0.02035	0.01815
0.02365	0.02816	0.01947								0.02123	0.02035	0.01815
0.02365	0.02816	0.01947								0.02123	0.02035	0.01815
0.02365	0.02827	0.01947								0.02123	0.02035	0.01815
0.02365	0.02827	0.01947								0.02134	0.02046	0.01815
0.02365	0.02827	0.01947								0.02134	0.02046	0.01815
0.02365	0.02827	0.01947								0.02134	0.02046	0.01815
0.02376	0.02827	0.01947								0.02134	0.02046	0.01815
0.02376	0.02827	0.01947								0.02134	0.02046	0.01826
0.02376	0.02827	0.01947								0.02134	0.02057	0.01826
0.02376	0.02827	0.01947								0.02134	0.02057	0.01826
0.02376	0.02827	0.01958								0.02134	0.02057	0.01826
0.02376	0.02827	0.01958								0.02134	0.02057	0.01826
0.02376	0.02838	0.01958								0.02134	0.02057	0.01826
0.02376	0.02838	0.01958								0.02134	0.02057	0.01826
0.02376	0.02838	0.01958								0.02134	0.02057	0.01826
0.02376	0.02838	0.01958								0.02134	0.02057	0.01826
0.02376	0.02838	0.01958								0.02145	0.02057	0.01826
0.02376	0.02838	0.01958								0.02145	0.02057	0.01837
0.02376	0.02838	0.01958								0.02145	0.02057	0.01837
0.02387	0.02849	0.01969								0.02145	0.02057	0.01837
0.02387	0.02849	0.01969								0.02145	0.02068	0.01837
0.02387	0.0286	0.01969								0.02145	0.02068	0.01837
0.02387	0.0286	0.01969								0.02145	0.02068	0.01837
0.02387	0.0286	0.01969								0.02145	0.02068	0.01837
0.02387	0.0286	0.01969								0.02145	0.02068	0.01837
0.02387	0.0286	0.01969								0.02145	0.02068	0.01837
0.02398	0.0286	0.01969								0.02156	0.02068	0.01837
0.02398	0.0286	0.01969								0.02156	0.02068	0.01837
0.02398	0.0286	0.01969								0.02156	0.02068	0.01837
0.02398	0.0286	0.01969								0.02156	0.02079	0.01837
0.02398	0.0286	0.01969								0.02156	0.02079	0.01837
0.02398	0.0286	0.0198								0.02156	0.02079	0.01848
0.02398	0.0286	0.0198								0.02156	0.02079	0.01848
0.02398	0.0286	0.0198								0.02156	0.02079	0.01848
0.02398	0.02871	0.0198								0.02156	0.02079	0.01848
0.02398	0.02871	0.0198								0.02156	0.02079	0.01848
0.02398	0.02871	0.0198								0.02167	0.02079	0.01848
0.02398	0.02871	0.0198								0.02167	0.0209	0.01848
0.02409	0.02871	0.0198								0.02167	0.0209	0.01848
0.02409	0.02871	0.0198								0.02167	0.0209	0.01848
0.02409	0.02871	0.0198								0.02167	0.0209	0.01848
0.02409	0.02882	0.01991								0.02167	0.0209	0.01848
0.02409	0.02882	0.01991								0.02167	0.0209	0.01848
0.02409	0.02882	0.01991								0.02167	0.02101	0.01848
0.02409	0.02882	0.01991								0.02167	0.02101	0.01848
0.02409	0.02882	0.01991								0.02167	0.02101	0.01848
0.02409	0.02882	0.01991								0.02167	0.02101	0.01859
0.0242	0.02882	0.01991								0.02167	0.02101	0.01859
0.0242	0.02882	0.02002								0.02167	0.02101	0.01859
0.0242	0.02882	0.02002								0.02178	0.02101	0.01859
0.0242	0.02893	0.02002								0.02178	0.02112	0.01859
0.0242	0.02893	0.02002								0.02178	0.02112	0.01859
0.0242	0.02893	0.02002								0.02178	0.02112	0.01859
0.0242	0.02893	0.02002								0.02189	0.02112	0.01859
0.0242	0.02893	0.02002								0.02189	0.02112	0.01859
0.0242	0.02893	0.02002								0.02189	0.02112	0.01859
0.0242	0.02904	0.02002								0.02189	0.02112	0.01859
0.0242	0.02904	0.02002								0.02189	0.02112	0.01859
0.02431	0.02904	0.02013								0.02189	0.02112	0.01859
0.02431	0.02904	0.02013								0.02189	0.02112	0.01859
0.02431	0.02904	0.02013								0.02189	0.02123	0.01859
0.02431	0.02904	0.02013								0.02189	0.02123	0.0187
0.02431	0.02904	0.02013								0.02189	0.02123	0.0187
0.02431	0.02904	0.02013								0.022	0.02123	0.0187
0.02431	0.02904	0.02013								0.022	0.02123	0.0187
0.02431	0.02904	0.02013								0.022	0.02123	0.0187
0.02431	0.02904	0.02013								0.022	0.02123	0.0187
0.02442	0.02904	0.02013								0.022	0.02123	0.0187
0.02442	0.02904	0.02024								0.022	0.02123	0.0187
0.02442	0.02915	0.02024								0.022	0.02123	0.01881
0.02442	0.02915	0.02024								0.022	0.02123	0.01881
0.02442	0.02915	0.02024								0.022	0.02123	0.01881
0.02442	0.02915	0.02024								0.02211	0.02123	0.01881
0.02442	0.02915	0.02024								0.02211	0.02123	0.01881
0.02442	0.02915	0.02024								0.02211	0.02134	0.01881
0.02442	0.02915	0.02024								0.02211	0.02134	0.01881
0.02442	0.02915	0.02024								0.02211	0.02134	0.01881
0.02442	0.02915	0.02024								0.02211	0.02145	0.01881
0.02442	0.02915	0.02024								0.02211	0.02145	0.01881
0.02453	0.02915	0.02024								0.02211	0.02145	0.01881
0.02453	0.02915	0.02035								0.02211	0.02145	0.01892
0.02453	0.02915	0.02035								0.02222	0.02145	0.01892
0.02453	0.02915	0.02035								0.02222	0.02145	0.01892
0.02453	0.02926	0.02035								0.02222	0.02145	0.01892
0.02453	0.02926	0.02035								0.02222	0.02145	0.01892
0.02453	0.02926	0.02035								0.02222	0.02145	0.01892
0.02453	0.02926	0.02035								0.02222	0.02145	0.01892
0.02453	0.02926	0.02035								0.02222	0.02145	0.01892
0.02453	0.02926	0.02035								0.02222	0.02145	0.01892
0.02453	0.02926	0.02035								0.02233	0.02145	0.01892
0.02464	0.02926	0.02046								0.02233	0.02145	0.01892
0.02464	0.02937	0.02046								0.02233	0.02145	0.01903
0.02464	0.02937	0.02046								0.02233	0.02145	0.01903
0.02464	0.02937	0.02046								0.02233	0.02145	0.01903
0.02464	0.02937	0.02057								0.02233	0.02156	0.01903
0.02464	0.02937	0.02057								0.02233	0.02156	0.01903
0.02475	0.02937	0.02057								0.02244	0.02156	0.01903
0.02475	0.02937	0.02057								0.02244	0.02156	0.01903
0.02475	0.02937	0.02057								0.02244	0.02156	0.01903
0.02475	0.02937	0.02057								0.02244	0.02156	0.01914
0.02475	0.02948	0.02057								0.02244	0.02156	0.01914
0.02475	0.02948	0.02057								0.02244	0.02156	0.01914
0.02475	0.02948	0.02057								0.02255	0.02156	0.01914
0.02475	0.02948	0.02057								0.02255	0.02156	0.01914
0.02486	0.02948	0.02057								0.02255	0.02156	0.01914
0.02486	0.02948	0.02068								0.02255	0.02156	0.01914
0.02486	0.02948	0.02068								0.02255	0.02167	0.01914
0.02486	0.02948	0.02068								0.02255	0.02167	0.01914
0.02486	0.02948	0.02068								0.02255	0.02167	0.01925
0.02486	0.02948	0.02068								0.02255	0.02167	0.01925
0.02486	0.02948	0.02068								0.02255	0.02167	0.01925
0.02486	0.02948	0.02068								0.02255	0.02167	0.01936
0.02486	0.02959	0.02068								0.02255	0.02167	0.01936
0.02486	0.02959	0.02068								0.02255	0.02167	0.01936
0.02497	0.02959	0.02068								0.02255	0.02167	0.01936
0.02497	0.02959	0.02079								0.02255	0.02167	0.01936
0.02497	0.0297	0.02079								0.02266	0.02167	0.01936
0.02497	0.0297	0.02079								0.02266	0.02167	0.01936
0.02497	0.0297	0.02079								0.02266	0.02167	0.01936
0.02508	0.0297	0.02079								0.02266	0.02167	0.01936
0.02508	0.0297	0.02079								0.02266	0.02167	0.01936
0.02508	0.0297	0.0209								0.02266	0.02167	0.01936
0.02508	0.0297	0.0209								0.02266	0.02167	0.01936
0.02508	0.0297	0.0209								0.02266	0.02167	0.01936
0.02508	0.0297	0.0209								0.02266	0.02167	0.01947
0.02508	0.0297	0.0209								0.02266	0.02178	0.01947
0.02508	0.02981	0.0209								0.02277	0.02178	0.01947
0.02508	0.02981	0.0209								0.02277	0.02178	0.01947
0.02508	0.02981	0.0209								0.02277	0.02178	0.01947
0.02508	0.02981	0.0209								0.02277	0.02178	0.01958
0.02508	0.02981	0.0209								0.02277	0.02178	0.01958
0.02508	0.02981	0.02101								0.02277	0.02178	0.01958
0.02508	0.02981	0.02101								0.02277	0.02189	0.01958
0.02508	0.02981	0.02101								0.02277	0.02189	0.01958
0.02508	0.02981	0.02101								0.02277	0.02189	0.01969
0.02508	0.02981	0.02101								0.02277	0.02189	0.01969
0.02508	0.02981	0.02101								0.02277	0.022	0.01969
0.02519	0.02992	0.02101								0.02277	0.022	0.01969
0.02519	0.02992	0.02101								0.02277	0.022	0.01969
0.02519	0.02992	0.02112								0.02277	0.022	0.01969
0.02519	0.02992	0.02112								0.02277	0.022	0.01969
0.02519	0.02992	0.02112								0.02277	0.022	0.01969
0.02519	0.02992	0.02112								0.02288	0.022	0.01969
0.0253	0.02992	0.02112								0.02288	0.022	0.01969
0.0253	0.02992	0.02112								0.02288	0.022	0.01969
0.0253	0.02992	0.02112								0.02288	0.022	0.01969
0.0253	0.02992	0.02112								0.02288	0.022	0.01969
0.0253	0.03003	0.02112								0.02288	0.022	0.01969
0.0253	0.03003	0.02112								0.02288	0.022	0.0198
0.0253	0.03003	0.02112								0.02288	0.022	0.0198
0.0253	0.03003	0.02112								0.02288	0.022	0.0198
0.0253	0.03003	0.02112								0.02288	0.022	0.0198
0.0253	0.03003	0.02112								0.02299	0.022	0.0198
0.02541	0.03003	0.02112								0.02299	0.022	0.0198
0.02541	0.03003	0.02123								0.02299	0.022	0.0198
0.02541	0.03003	0.02123								0.02299	0.02211	0.0198
0.02541	0.03003	0.02123								0.02299	0.02211	0.0198
0.02541	0.03003	0.02123								0.02299	0.02211	0.0198
0.02541	0.03003	0.02123								0.02299	0.02211	0.0198
0.02541	0.03003	0.02123								0.02299	0.02211	0.01991
0.02541	0.03003	0.02123								0.02299	0.02211	0.01991
0.02541	0.03014	0.02123								0.02299	0.02211	0.01991
0.02541	0.03014	0.02123								0.02299	0.02211	0.01991
0.02552	0.03014	0.02123								0.02299	0.02211	0.01991
0.02552	0.03025	0.02123								0.02299	0.02211	0.01991
0.02552	0.03025	0.02123								0.0231	0.02211	0.01991
0.02552	0.03025	0.02123								0.0231	0.02222	0.01991
0.02552	0.03025	0.02134								0.0231	0.02222	0.01991
0.02552	0.03025	0.02134								0.0231	0.02222	0.01991
0.02552	0.03025	0.02134								0.0231	0.02222	0.01991
0.02552	0.03025	0.02134								0.0231	0.02222	0.01991
0.02552	0.03036	0.02134								0.0231	0.02222	0.01991
0.02552	0.03036	0.02134								0.0231	0.02222	0.01991
0.02552	0.03036	0.02134								0.0231	0.02222	0.02002
0.02563	0.03036	0.02134								0.0231	0.02222	0.02002
0.02563	0.03036	0.02134								0.0231	0.02222	0.02002
0.02563	0.03036	0.02134								0.0231	0.02222	0.02002
0.02563	0.03036	0.02134								0.0231	0.02222	0.02002
0.02563	0.03036	0.02145								0.0231	0.02222	0.02002
0.02563	0.03036	0.02145								0.0231	0.02222	0.02002
0.02563	0.03036	0.02145								0.02321	0.02233	0.02002
0.02563	0.03036	0.02145								0.02321	0.02233	0.02002
0.02563	0.03047	0.02145								0.02321	0.02233	0.02002
0.02574	0.03047	0.02145								0.02321	0.02233	0.02002
0.02574	0.03047	0.02145								0.02321	0.02233	0.02002
0.02574	0.03047	0.02145								0.02321	0.02233	0.02013
0.02574	0.03047	0.02156								0.02321	0.02233	0.02013
0.02574	0.03047	0.02156								0.02321	0.02233	0.02013
0.02574	0.03047	0.02156								0.02321	0.02233	0.02013
0.02574	0.03047	0.02156								0.02321	0.02244	0.02013
0.02585	0.03058	0.02156								0.02321	0.02244	0.02013
0.02585	0.03058	0.02156								0.02321	0.02244	0.02013
0.02585	0.03058	0.02156								0.02321	0.02244	0.02013
0.02585	0.03058	0.02156								0.02321	0.02255	0.02013
0.02585	0.03058	0.02156								0.02321	0.02255	0.02013
0.02585	0.03058	0.02156								0.02332	0.02255	0.02013
0.02585	0.03058	0.02167								0.02332	0.02255	0.02013
0.02585	0.03058	0.02167								0.02332	0.02255	0.02013
0.02585	0.03058	0.02167								0.02332	0.02255	0.02013
0.02585	0.03069	0.02167								0.02332	0.02255	0.02013
0.02596	0.03069	0.02167								0.02332	0.02255	0.02024
0.02596	0.03069	0.02167								0.02332	0.02266	0.02024
0.02596	0.03069	0.02167								0.02332	0.02266	0.02024
0.02596	0.03069	0.02178								0.02332	0.02266	0.02024
0.02596	0.03069	0.02178								0.02332	0.02266	0.02024
0.02596	0.0308	0.02178								0.02332	0.02266	0.02024
0.02596	0.0308	0.02178								0.02332	0.02266	0.02024
0.02596	0.0308	0.02178								0.02332	0.02266	0.02035
0.02596	0.0308	0.02178								0.02332	0.02266	0.02035
0.02596	0.0308	0.02189								0.02343	0.02266	0.02035
0.02607	0.0308	0.02189								0.02343	0.02266	0.02035
0.02607	0.0308	0.02189								0.02343	0.02266	0.02035
0.02607	0.0308	0.02189								0.02343	0.02277	0.02035
0.02607	0.0308	0.02189								0.02343	0.02277	0.02035
0.02607	0.03091	0.02189								0.02343	0.02277	0.02035
0.02607	0.03091	0.02189								0.02343	0.02277	0.02035
0.02607	0.03091	0.02189								0.02343	0.02277	0.02035
0.02607	0.03091	0.02189								0.02343	0.02277	0.02046
0.02607	0.03091	0.02189								0.02354	0.02277	0.02046
0.02607	0.03091	0.02189								0.02354	0.02277	0.02046
0.02618	0.03091	0.02189								0.02354	0.02277	0.02046
0.02618	0.03091	0.02189								0.02354	0.02277	0.02046
0.02618	0.03102	0.02189								0.02354	0.02277	0.02046
0.02618	0.03102	0.022								0.02354	0.02277	0.02046
0.02618	0.03102	0.022								0.02354	0.02277	0.02046
0.02618	0.03102	0.022								0.02354	0.02288	0.02046
0.02618	0.03102	0.022								0.02354	0.02288	0.02046
0.02618	0.03102	0.022								0.02354	0.02288	0.02046
0.02618	0.03102	0.022								0.02365	0.02288	0.02046
0.02618	0.03102	0.022								0.02365	0.02288	0.02057
0.02618	0.03102	0.022								0.02365	0.02288	0.02057
0.02618	0.03113	0.022								0.02365	0.02288	0.02057
0.02618	0.03113	0.022								0.02365	0.02288	0.02057
0.02629	0.03113	0.022								0.02365	0.02288	0.02057
0.02629	0.03113	0.022								0.02365	0.02288	0.02057
0.02629	0.03113	0.022								0.02365	0.02288	0.02068
0.02629	0.03124	0.02211								0.02365	0.02288	0.02068
0.02629	0.03124	0.02211								0.02365	0.02288	0.02068
0.02629	0.03124	0.02211								0.02365	0.02288	0.02068
0.02629	0.03124	0.02211								0.02376	0.02288	0.02068
0.02629	0.03124	0.02211								0.02376	0.02288	0.02068
0.02629	0.03124	0.02211								0.02376	0.02288	0.02068
0.0264	0.03124	0.02211								0.02376	0.02299	0.02068
0.0264	0.03124	0.02211								0.02376	0.02299	0.02068
0.0264	0.03124	0.02211								0.02376	0.02299	0.02068
0.0264	0.03124	0.02211								0.02376	0.02299	0.02068
0.0264	0.03124	0.02211								0.02376	0.02299	0.02068
0.0264	0.03124	0.02222								0.02376	0.02299	0.02068
0.0264	0.03124	0.02222								0.02376	0.02299	0.02079
0.0264	0.03124	0.02222								0.02376	0.02299	0.02079
0.0264	0.03124	0.02222								0.02376	0.02299	0.02079
0.02651	0.03124	0.02222								0.02376	0.02299	0.02079
0.02651	0.03135	0.02222								0.02376	0.0231	0.02079
0.02651	0.03135	0.02222								0.02387	0.0231	0.02079
0.02651	0.03135	0.02222								0.02387	0.0231	0.02079
0.02651	0.03135	0.02222								0.02387	0.0231	0.02079
0.02651	0.03135	0.02222								0.02387	0.0231	0.02079
0.02651	0.03146	0.02233								0.02387	0.0231	0.02079
0.02651	0.03146	0.02233								0.02387	0.0231	0.02079
0.02651	0.03146	0.02233								0.02387	0.0231	0.0209
0.02651	0.03146	0.02233								0.02387	0.0231	0.0209
0.02651	0.03146	0.02233								0.02387	0.02321	0.0209
0.02651	0.03146	0.02233								0.02387	0.02321	0.0209
0.02662	0.03146	0.02233								0.02387	0.02321	0.0209
0.02662	0.03146	0.02233								0.02387	0.02321	0.0209
0.02662	0.03146	0.02233								0.02398	0.02321	0.0209
0.02662	0.03146	0.02233								0.02398	0.02321	0.0209
0.02662	0.03146	0.02233								0.02398	0.02321	0.0209
0.02662	0.03146	0.02233								0.02398	0.02321	0.0209
0.02662	0.03157	0.02233								0.02398	0.02332	0.02101
0.02662	0.03157	0.02233								0.02398	0.02332	0.02101
0.02662	0.03157	0.02233								0.02398	0.02332	0.02101
0.02673	0.03157	0.02244								0.02398	0.02332	0.02101
0.02673	0.03157	0.02244								0.02398	0.02332	0.02101
0.02673	0.03157	0.02244								0.02409	0.02332	0.02101
0.02673	0.03157	0.02244								0.02409	0.02332	0.02101
0.02673	0.03157	0.02244								0.02409	0.02332	0.02101
0.02673	0.03157	0.02244								0.02409	0.02343	0.02101
0.02673	0.03157	0.02244								0.02409	0.02343	0.02112
0.02684	0.03157	0.02244								0.02409	0.02343	0.02112
0.02684	0.03168	0.02244								0.02409	0.02343	0.02112
0.02684	0.03168	0.02244								0.02409	0.02343	0.02112
0.02684	0.03168	0.02244								0.02409	0.02343	0.02112
0.02684	0.03168	0.02255								0.02409	0.02343	0.02112
0.02684	0.03168	0.02255								0.0242	0.02343	0.02112
0.02684	0.03168	0.02255								0.0242	0.02343	0.02112
0.02684	0.03168	0.02255								0.0242	0.02343	0.02112
0.02684	0.03168	0.02255								0.0242	0.02343	0.02112
0.02684	0.03168	0.02255								0.0242	0.02343	0.02123
0.02684	0.03168	0.02255								0.0242	0.02343	0.02123
0.02684	0.03168	0.02255								0.0242	0.02343	0.02123
0.02695	0.03168	0.02255								0.0242	0.02343	0.02123
0.02695	0.03179	0.02255								0.0242	0.02343	0.02123
0.02695	0.03179	0.02255								0.0242	0.02343	0.02123
0.02695	0.03179	0.02255								0.0242	0.02343	0.02123
0.02695	0.03179	0.02255								0.0242	0.02354	0.02123
0.02695	0.03179	0.02255								0.0242	0.02354	0.02123
0.02695	0.03179	0.02255								0.02431	0.02354	0.02123
0.02695	0.03179	0.02255								0.02431	0.02354	0.02134
0.02695	0.03179	0.02255								0.02431	0.02354	0.02134
0.02695	0.03179	0.02255								0.02431	0.02354	0.02134
0.02695	0.0319	0.02266								0.02431	0.02354	0.02134
0.02706	0.0319	0.02266								0.02431	0.02354	0.02134
0.02706	0.0319	0.02266								0.02431	0.02354	0.02134
0.02706	0.0319	0.02266								0.02431	0.02354	0.02134
0.02706	0.0319	0.02266								0.02431	0.02354	0.02134
0.02706	0.0319	0.02266								0.02431	0.02354	0.02134
0.02706	0.0319	0.02266								0.02442	0.02354	0.02134
0.02706	0.0319	0.02266								0.02442	0.02354	0.02134
0.02706	0.0319	0.02266								0.02442	0.02365	0.02134
0.02706	0.03201	0.02266								0.02442	0.02365	0.02134
0.02706	0.03201	0.02266								0.02442	0.02365	0.02134
0.02706	0.03201	0.02266								0.02442	0.02365	0.02134
0.02706	0.03201	0.02266								0.02442	0.02376	0.02134
0.02706	0.03201	0.02277								0.02442	0.02376	0.02134
0.02706	0.03201	0.02277								0.02442	0.02376	0.02145
0.02706	0.03201	0.02277								0.02453	0.02376	0.02145
0.02706	0.03201	0.02277								0.02453	0.02376	0.02145
0.02717	0.03212	0.02277								0.02453	0.02376	0.02145
0.02717	0.03212	0.02288								0.02453	0.02376	0.02145
0.02717	0.03212	0.02288								0.02453	0.02376	0.02145
0.02717	0.03212	0.02288								0.02453	0.02376	0.02145
0.02717	0.03212	0.02288								0.02453	0.02376	0.02145
0.02717	0.03223	0.02288								0.02453	0.02376	0.02145
0.02717	0.03223	0.02288								0.02453	0.02376	0.02145
0.02717	0.03223	0.02288								0.02453	0.02376	0.02145
0.02728	0.03223	0.02288								0.02453	0.02376	0.02145
0.02728	0.03223	0.02288								0.02453	0.02376	0.02145
0.02728	0.03223	0.02288								0.02464	0.02387	0.02156
0.02728	0.03223	0.02288								0.02464	0.02387	0.02156
0.02728	0.03223	0.02288								0.02464	0.02387	0.02156
0.02728	0.03234	0.02299								0.02464	0.02387	0.02156
0.02739	0.03234	0.02299								0.02464	0.02387	0.02156
0.02739	0.03234	0.02299								0.02464	0.02387	0.02156
0.02739	0.03234	0.02299								0.02464	0.02387	0.02156
0.02739	0.03234	0.02299								0.02464	0.02387	0.02156
0.02739	0.03234	0.02299								0.02464	0.02387	0.02156
0.02739	0.03234	0.02299								0.02464	0.02387	0.02156
0.02739	0.03234	0.02299								0.02464	0.02398	0.02156
0.02739	0.03234	0.0231								0.02464	0.02398	0.02156
0.02739	0.03234	0.0231								0.02464	0.02398	0.02167
0.02739	0.03234	0.0231								0.02464	0.02398	0.02167
0.02739	0.03245	0.0231								0.02464	0.02398	0.02167
0.02739	0.03245	0.0231								0.02464	0.02409	0.02167
0.02739	0.03245	0.0231								0.02464	0.02409	0.02167
0.02739	0.03245	0.0231								0.02464	0.02409	0.02167
0.0275	0.03245	0.0231								0.02464	0.02409	0.02167
0.0275	0.03245	0.0231								0.02464	0.02409	0.02167
0.0275	0.03245	0.0231								0.02464	0.02409	0.02167
0.0275	0.03245	0.0231								0.02475	0.02409	0.02167
0.0275	0.03245	0.0231								0.02475	0.02409	0.02178
0.0275	0.03245	0.0231								0.02475	0.02409	0.02178
0.0275	0.03256	0.0231								0.02475	0.02409	0.02178
0.02761	0.03256	0.0231								0.02475	0.02409	0.02178
0.02761	0.03256	0.02321								0.02475	0.02409	0.02178
0.02761	0.03256	0.02321								0.02475	0.02409	0.02178
0.02761	0.03256	0.02321								0.02475	0.0242	0.02178
0.02761	0.03256	0.02321								0.02475	0.0242	0.02178
0.02761	0.03256	0.02321								0.02486	0.0242	0.02178
0.02761	0.03256	0.02321								0.02486	0.0242	0.02178
0.02772	0.03256	0.02321								0.02486	0.0242	0.02178
0.02772	0.03256	0.02321								0.02486	0.0242	0.02178
0.02772	0.03256	0.02321								0.02486	0.0242	0.02178
0.02772	0.03256	0.02332								0.02486	0.0242	0.02178
0.02772	0.03267	0.02332								0.02486	0.0242	0.02189
0.02772	0.03267	0.02332								0.02486	0.0242	0.02189
0.02772	0.03267	0.02332								0.02486	0.0242	0.02189
0.02772	0.03267	0.02332								0.02486	0.0242	0.02189
0.02772	0.03267	0.02332								0.02486	0.0242	0.02189
0.02772	0.03267	0.02332								0.02486	0.02431	0.02189
0.02772	0.03267	0.02332								0.02486	0.02431	0.02189
0.02772	0.03267	0.02332								0.02497	0.02431	0.02189
0.02772	0.03267	0.02332								0.02497	0.02431	0.02189
0.02783	0.03267	0.02332								0.02497	0.02431	0.02189
0.02783	0.03267	0.02332								0.02497	0.02431	0.02189
0.02783	0.03267	0.02332								0.02497	0.02431	0.02189
0.02783	0.03267	0.02332								0.02497	0.02431	0.02189
0.02783	0.03278	0.02332								0.02497	0.02431	0.022
0.02783	0.03278	0.02332								0.02497	0.02431	0.022
0.02783	0.03278	0.02332								0.02497	0.02442	0.022
0.02783	0.03278	0.02332								0.02497	0.02442	0.022
0.02783	0.03278	0.02332								0.02497	0.02442	0.022
0.02783	0.03278	0.02343								0.02497	0.02442	0.022
0.02794	0.03278	0.02343								0.02508	0.02442	0.022
0.02794	0.03278	0.02343								0.02508	0.02442	0.022
0.02794	0.03278	0.02343								0.02508	0.02442	0.022
0.02794	0.03278	0.02343								0.02508	0.02442	0.022
0.02794	0.03278	0.02343								0.02508	0.02442	0.022
0.02794	0.03289	0.02343								0.02508	0.02442	0.02211
0.02794	0.03289	0.02343								0.02508	0.02453	0.02211
0.02794	0.03289	0.02343								0.02508	0.02453	0.02211
0.02794	0.03289	0.02343								0.02508	0.02453	0.02211
0.02794	0.03289	0.02343								0.02508	0.02453	0.02211
0.02794	0.03289	0.02343								0.02508	0.02453	0.02211
0.02805	0.03289	0.02343								0.02519	0.02453	0.02211
0.02805	0.03289	0.02343								0.02519	0.02453	0.02211
0.02805	0.03289	0.02354								0.02519	0.02453	0.02211
0.02805	0.03289	0.02354								0.02519	0.02453	0.02211
0.02805	0.033	0.02354								0.02519	0.02453	0.02211
0.02805	0.03311	0.02354								0.02519	0.02453	0.02211
0.02805	0.03311	0.02354								0.02519	0.02464	0.02211
0.02805	0.03311	0.02354								0.02519	0.02464	0.02211
0.02816	0.03311	0.02354								0.02519	0.02464	0.02211
0.02816	0.03311	0.02354								0.02519	0.02464	0.02211
0.02816	0.03311	0.02354								0.02519	0.02464	0.02222
0.02816	0.03311	0.02365								0.02519	0.02464	0.02222
0.02816	0.03311	0.02365								0.02519	0.02464	0.02222
0.02827	0.03311	0.02365								0.02519	0.02464	0.02222
0.02827	0.03311	0.02365								0.0253	0.02464	0.02222
0.02827	0.03311	0.02365								0.0253	0.02464	0.02222
0.02827	0.03311	0.02365								0.0253	0.02464	0.02222
0.02827	0.03311	0.02365								0.0253	0.02464	0.02222
0.02827	0.03322	0.02365								0.0253	0.02464	0.02222
0.02827	0.03322	0.02365								0.0253	0.02464	0.02222
0.02827	0.03322	0.02365								0.0253	0.02475	0.02222
0.02827	0.03322	0.02365								0.0253	0.02475	0.02222
0.02827	0.03322	0.02365								0.0253	0.02475	0.02222
0.02827	0.03322	0.02376								0.0253	0.02475	0.02222
0.02827	0.03322	0.02376								0.0253	0.02475	0.02233
0.02827	0.03322	0.02376								0.0253	0.02475	0.02233
0.02827	0.03322	0.02376								0.0253	0.02475	0.02233
0.02827	0.03322	0.02376								0.0253	0.02475	0.02233
0.02827	0.03322	0.02376								0.0253	0.02475	0.02233
0.02838	0.03322	0.02376								0.0253	0.02475	0.02233
0.02838	0.03333	0.02376								0.0253	0.02475	0.02233
0.02838	0.03333	0.02376								0.0253	0.02475	0.02233
0.02838	0.03333	0.02376								0.0253	0.02475	0.02233
0.02838	0.03333	0.02376								0.02541	0.02486	0.02233
0.02838	0.03333	0.02387								0.02541	0.02486	0.02233
0.02838	0.03333	0.02387								0.02541	0.02486	0.02233
0.02838	0.03333	0.02387								0.02541	0.02486	0.02233
0.02838	0.03333	0.02387								0.02541	0.02486	0.02233
0.02838	0.03333	0.02387								0.02541	0.02486	0.02233
0.02838	0.03333	0.02387								0.02541	0.02486	0.02233
0.02838	0.03333	0.02387								0.02541	0.02486	0.02233
0.02838	0.03333	0.02387								0.02541	0.02486	0.02233
0.02849	0.03333	0.02387								0.02541	0.02486	0.02233
0.02849	0.03344	0.02398								0.02541	0.02497	0.02244
0.02849	0.03344	0.02398								0.02552	0.02497	0.02244
0.02849	0.03344	0.02398								0.02552	0.02497	0.02244
0.02849	0.03344	0.02398								0.02552	0.02497	0.02244
0.02849	0.03344	0.02398								0.02552	0.02497	0.02244
0.02849	0.03344	0.02398								0.02552	0.02497	0.02244
0.02849	0.03344	0.02398								0.02552	0.02497	0.02244
0.02849	0.03344	0.02398								0.02552	0.02497	0.02244
0.02849	0.03344	0.02398								0.02552	0.02497	0.02244
0.02849	0.03355	0.02398								0.02552	0.02497	0.02244
0.02849	0.03355	0.02398								0.02563	0.02497	0.02244
0.02849	0.03355	0.02409								0.02563	0.02497	0.02244
0.0286	0.03355	0.02409								0.02563	0.02497	0.02244
0.0286	0.03355	0.02409								0.02563	0.02497	0.02244
0.0286	0.03366	0.02409								0.02563	0.02497	0.02244
0.0286	0.03366	0.02409								0.02563	0.02508	0.02244
0.0286	0.03366	0.02409								0.02563	0.02508	0.02244
0.0286	0.03366	0.02409								0.02563	0.02508	0.02244
0.0286	0.03366	0.02409								0.02563	0.02508	0.02244
0.0286	0.03366	0.02409								0.02574	0.02508	0.02255
0.02871	0.03366	0.02409								0.02574	0.02508	0.02255
0.02871	0.03366	0.02409								0.02574	0.02508	0.02255
0.02871	0.03366	0.0242								0.02574	0.02508	0.02255
0.02871	0.03366	0.0242								0.02574	0.02508	0.02255
0.02871	0.03366	0.0242								0.02574	0.02508	0.02255
0.02871	0.03366	0.0242								0.02574	0.02508	0.02255
0.02871	0.03366	0.0242								0.02585	0.02519	0.02255
0.02871	0.03366	0.0242								0.02585	0.02519	0.02255
0.02882	0.03377	0.0242								0.02585	0.02519	0.02255
0.02882	0.03377	0.0242								0.02585	0.02519	0.02255
0.02882	0.03377	0.0242								0.02585	0.02519	0.02255
0.02882	0.03377	0.02431								0.02585	0.02519	0.02255
0.02882	0.03377	0.02431								0.02585	0.02519	0.02255
0.02882	0.03377	0.02431								0.02585	0.02519	0.02255
0.02882	0.03377	0.02431								0.02585	0.02519	0.02266
0.02882	0.03377	0.02431								0.02585	0.02519	0.02266
0.02882	0.03377	0.02431								0.02585	0.02519	0.02266
0.02882	0.03388	0.02431								0.02585	0.02519	0.02266
0.02893	0.03388	0.02431								0.02585	0.0253	0.02266
0.02893	0.03388	0.02431								0.02585	0.0253	0.02266
0.02893	0.03388	0.02431								0.02585	0.0253	0.02266
0.02893	0.03388	0.02431								0.02585	0.0253	0.02266
0.02893	0.03388	0.02431								0.02585	0.0253	0.02266
0.02893	0.03388	0.02431								0.02596	0.0253	0.02266
0.02893	0.03388	0.02442								0.02596	0.0253	0.02266
0.02893	0.03388	0.02442								0.02596	0.0253	0.02266
0.02893	0.03388	0.02442								0.02596	0.02541	0.02266
0.02904	0.03388	0.02442								0.02596	0.02541	0.02266
0.02904	0.03399	0.02442								0.02596	0.02541	0.02266
0.02904	0.03399	0.02442								0.02596	0.02541	0.02266
0.02904	0.03399	0.02442								0.02596	0.02541	0.02266
0.02904	0.03399	0.02442								0.02596	0.02541	0.02266
0.02904	0.03399	0.02442								0.02607	0.02541	0.02266
0.02904	0.03399	0.02442								0.02607	0.02541	0.02266
0.02904	0.03399	0.02442								0.02607	0.02541	0.02266
0.02904	0.03399	0.02442								0.02607	0.02552	0.02266
0.02904	0.03399	0.02442								0.02607	0.02552	0.02277
0.02904	0.03399	0.02442								0.02607	0.02552	0.02277
0.02904	0.03399	0.02442								0.02607	0.02552	0.02277
0.02904	0.03399	0.02453								0.02607	0.02552	0.02277
0.02904	0.03399	0.02453								0.02607	0.02552	0.02277
0.02915	0.03399	0.02453								0.02607	0.02552	0.02277
0.02915	0.0341	0.02453								0.02607	0.02552	0.02277
0.02915	0.0341	0.02453								0.02607	0.02552	0.02277
0.02915	0.0341	0.02453								0.02607	0.02563	0.02277
0.02915	0.0341	0.02453								0.02607	0.02563	0.02277
0.02915	0.0341	0.02453								0.02607	0.02563	0.02277
0.02915	0.0341	0.02453								0.02607	0.02563	0.02277
0.02915	0.0341	0.02453								0.02618	0.02563	0.02277
0.02926	0.0341	0.02453								0.02618	0.02563	0.02277
0.02926	0.0341	0.02464								0.02618	0.02563	0.02288
0.02926	0.0341	0.02464								0.02618	0.02563	0.02288
0.02926	0.0341	0.02464								0.02618	0.02563	0.02288
0.02926	0.0341	0.02464								0.02618	0.02574	0.02288
0.02926	0.0341	0.02464								0.02618	0.02574	0.02288
0.02926	0.03421	0.02464								0.02618	0.02574	0.02288
0.02926	0.03421	0.02464								0.02618	0.02574	0.02288
0.02926	0.03421	0.02464								0.02618	0.02574	0.02288
0.02926	0.03421	0.02464								0.02618	0.02574	0.02288
0.02926	0.03421	0.02464								0.02629	0.02574	0.02288
0.02937	0.03421	0.02464								0.02629	0.02574	0.02288
0.02937	0.03421	0.02464								0.02629	0.02574	0.02288
0.02937	0.03432	0.02464								0.02629	0.02574	0.02299
0.02937	0.03432	0.02464								0.02629	0.02574	0.02299
0.02937	0.03432	0.02464								0.02629	0.02574	0.02299
0.02937	0.03432	0.02464								0.02629	0.02574	0.02299
0.02937	0.03432	0.02475								0.02629	0.02574	0.02299
0.02948	0.03432	0.02475								0.02629	0.02574	0.02299
0.02948	0.03432	0.02475								0.02629	0.02585	0.02299
0.02948	0.03432	0.02475								0.02629	0.02585	0.02299
0.02948	0.03443	0.02475								0.02629	0.02585	0.02299
0.02948	0.03443	0.02475								0.02629	0.02585	0.02299
0.02948	0.03443	0.02475								0.02629	0.02585	0.02299
0.02948	0.03443	0.02475								0.02629	0.02585	0.02299
0.02948	0.03443	0.02475								0.0264	0.02585	0.02299
0.02948	0.03443	0.02475								0.0264	0.02585	0.02299
0.02948	0.03443	0.02475								0.0264	0.02585	0.02299
0.02959	0.03443	0.02475								0.0264	0.02585	0.02299
0.02959	0.03443	0.02475								0.0264	0.02585	0.02299
0.02959	0.03443	0.02475								0.0264	0.02585	0.02299
0.02959	0.03443	0.02475								0.0264	0.02585	0.02299
0.02959	0.03443	0.02475								0.0264	0.02585	0.02299
0.02959	0.03454	0.02475								0.0264	0.02585	0.02299
0.02959	0.03454	0.02475								0.0264	0.02585	0.0231
0.02959	0.03454	0.02475								0.0264	0.02585	0.0231
0.02959	0.03454	0.02475								0.0264	0.02585	0.0231
0.02959	0.03454	0.02475								0.0264	0.02585	0.0231
0.02959	0.03454	0.02475								0.0264	0.02585	0.0231
0.02959	0.03454	0.02475								0.0264	0.02585	0.0231
0.02959	0.03454	0.02486								0.0264	0.02585	0.0231
0.0297	0.03465	0.02486								0.02651	0.02596	0.0231
0.0297	0.03465	0.02486								0.02651	0.02596	0.0231
0.0297	0.03465	0.02486								0.02651	0.02596	0.0231
0.0297	0.03465	0.02486								0.02651	0.02596	0.0231
0.0297	0.03476	0.02486								0.02651	0.02596	0.0231
0.0297	0.03476	0.02486								0.02651	0.02596	0.0231
0.0297	0.03476	0.02486								0.02651	0.02596	0.0231
0.0297	0.03476	0.02486								0.02651	0.02596	0.02321
0.0297	0.03476	0.02486								0.02651	0.02596	0.02321
0.0297	0.03476	0.02486								0.02651	0.02596	0.02321
0.0297	0.03476	0.02486								0.02651	0.02607	0.02321
0.0297	0.03487	0.02486								0.02651	0.02607	0.02321
0.0297	0.03487	0.02486								0.02651	0.02607	0.02321
0.02981	0.03487	0.02486								0.02651	0.02607	0.02321
0.02981	0.03487	0.02486								0.02651	0.02607	0.02321
0.02981	0.03487	0.02497								0.02662	0.02607	0.02321
0.02981	0.03498	0.02497								0.02662	0.02607	0.02321
0.02981	0.03498	0.02497								0.02662	0.02607	0.02321
0.02981	0.03498	0.02497								0.02662	0.02607	0.02321
0.02981	0.03498	0.02497								0.02662	0.02607	0.02321
0.02981	0.03498	0.02497								0.02662	0.02607	0.02332
0.02981	0.03498	0.02497								0.02662	0.02607	0.02332
0.02981	0.03498	0.02497								0.02662	0.02618	0.02332
0.02981	0.03498	0.02497								0.02662	0.02618	0.02332
0.02981	0.03498	0.02497								0.02662	0.02618	0.02332
0.02981	0.03498	0.02497								0.02662	0.02618	0.02332
0.02981	0.03498	0.02497								0.02662	0.02618	0.02332
0.02992	0.03498	0.02497								0.02662	0.02618	0.02332
0.02992	0.03509	0.02497								0.02662	0.02618	0.02332
0.02992	0.03509	0.02497								0.02662	0.02629	0.02332
0.02992	0.03509	0.02497								0.02662	0.02629	0.02332
0.02992	0.03509	0.02508								0.02662	0.02629	0.02332
0.02992	0.0352	0.02508								0.02662	0.02629	0.02332
0.02992	0.0352	0.02508								0.02662	0.02629	0.02343
0.02992	0.0352	0.02508								0.02673	0.02629	0.02343
0.02992	0.0352	0.02508								0.02673	0.02629	0.02343
0.03003	0.0352	0.02508								0.02673	0.02629	0.02343
0.03003	0.03531	0.02508								0.02673	0.02629	0.02343
0.03003	0.03531	0.02508								0.02673	0.02629	0.02343
0.03003	0.03531	0.02508								0.02673	0.02629	0.02343
0.03003	0.03531	0.02508								0.02673	0.02629	0.02343
0.03003	0.03531	0.02508								0.02673	0.02629	0.02343
0.03003	0.03531	0.02508								0.02673	0.02629	0.02343
0.03003	0.03542	0.02508								0.02673	0.02629	0.02343
0.03014	0.03542	0.02508								0.02673	0.02629	0.02343
0.03014	0.03542	0.02508								0.02673	0.02629	0.02343
0.03014	0.03542	0.02508								0.02673	0.0264	0.02343
0.03014	0.03542	0.02519								0.02673	0.0264	0.02343
0.03014	0.03542	0.02519								0.02673	0.0264	0.02343
0.03014	0.03542	0.02519								0.02673	0.0264	0.02343
0.03014	0.03542	0.02519								0.02673	0.0264	0.02354
0.03014	0.03542	0.02519								0.02673	0.0264	0.02354
0.03014	0.03553	0.02519								0.02673	0.0264	0.02354
0.03014	0.03553	0.02519								0.02673	0.0264	0.02354
0.03014	0.03553	0.02519								0.02673	0.0264	0.02354
0.03014	0.03553	0.02519								0.02673	0.0264	0.02354
0.03014	0.03553	0.02519								0.02673	0.0264	0.02354
0.03014	0.03553	0.02519								0.02673	0.0264	0.02354
0.03025	0.03553	0.02519								0.02684	0.0264	0.02365
0.03025	0.03553	0.02519								0.02684	0.02651	0.02365
0.03025	0.03553	0.02519								0.02684	0.02651	0.02365
0.03025	0.03553	0.02519								0.02684	0.02651	0.02365
0.03025	0.03553	0.02519								0.02684	0.02651	0.02365
0.03025	0.03564	0.0253								0.02684	0.02651	0.02365
0.03025	0.03564	0.0253								0.02684	0.02651	0.02365
0.03025	0.03564	0.0253								0.02684	0.02651	0.02365
0.03025	0.03564	0.0253								0.02684	0.02651	0.02365
0.03025	0.03564	0.0253								0.02684	0.02651	0.02365
0.03036	0.03564	0.0253								0.02684	0.02651	0.02365
0.03036	0.03564	0.0253								0.02684	0.02651	0.02376
0.03036	0.03564	0.0253								0.02684	0.02651	0.02376
0.03036	0.03564	0.0253								0.02684	0.02651	0.02376
0.03036	0.03564	0.0253								0.02695	0.02651	0.02376
0.03036	0.03575	0.02541								0.02695	0.02662	0.02376
0.03047	0.03575	0.02541								0.02695	0.02662	0.02376
0.03047	0.03575	0.02541								0.02695	0.02662	0.02376
0.03047	0.03575	0.02541								0.02695	0.02662	0.02376
0.03047	0.03575	0.02541								0.02695	0.02662	0.02376
0.03047	0.03575	0.02541								0.02695	0.02662	0.02376
0.03047	0.03575	0.02541								0.02695	0.02662	0.02376
0.03047	0.03586	0.02541								0.02695	0.02662	0.02376
0.03047	0.03586	0.02541								0.02695	0.02662	0.02376
0.03047	0.03586	0.02541								0.02695	0.02662	0.02376
0.03047	0.03586	0.02541								0.02706	0.02662	0.02376
0.03047	0.03586	0.02541								0.02706	0.02662	0.02376
0.03058	0.03586	0.02541								0.02706	0.02673	0.02376
0.03058	0.03586	0.02552								0.02706	0.02673	0.02376
0.03058	0.03586	0.02552								0.02706	0.02673	0.02387
0.03058	0.03597	0.02552								0.02706	0.02673	0.02387
0.03058	0.03597	0.02552								0.02706	0.02673	0.02387
0.03058	0.03597	0.02552								0.02706	0.02673	0.02387
0.03058	0.03597	0.02552								0.02706	0.02673	0.02387
0.03058	0.03597	0.02552								0.02706	0.02684	0.02387
0.03069	0.03608	0.02552								0.02706	0.02684	0.02387
0.03069	0.03608	0.02552								0.02706	0.02684	0.02398
0.03069	0.03608	0.02552								0.02717	0.02684	0.02398
0.03069	0.03608	0.02552								0.02717	0.02684	0.02398
0.03069	0.03608	0.02552								0.02717	0.02684	0.02398
0.03069	0.03608	0.02552								0.02717	0.02684	0.02398
0.03069	0.03608	0.02552								0.02717	0.02684	0.02398
0.03069	0.03608	0.02552								0.02717	0.02684	0.02398
0.03069	0.03619	0.02552								0.02717	0.02684	0.02398
0.0308	0.03619	0.02552								0.02717	0.02684	0.02398
0.0308	0.03619	0.02552								0.02717	0.02684	0.02398
0.0308	0.03619	0.02563								0.02717	0.02695	0.02398
0.0308	0.03619	0.02563								0.02717	0.02695	0.02398
0.0308	0.03619	0.02563								0.02717	0.02695	0.02398
0.0308	0.0363	0.02563								0.02717	0.02695	0.02398
0.0308	0.0363	0.02563								0.02728	0.02695	0.02398
0.0308	0.0363	0.02563								0.02728	0.02695	0.02398
0.0308	0.0363	0.02563								0.02728	0.02695	0.02398
0.0308	0.0363	0.02563								0.02728	0.02695	0.02398
0.0308	0.0363	0.02563								0.02728	0.02695	0.02409
0.0308	0.0363	0.02563								0.02728	0.02695	0.02409
0.03091	0.0363	0.02563								0.02728	0.02695	0.02409
0.03091	0.0363	0.02563								0.02739	0.02695	0.02409
0.03091	0.0363	0.02563								0.02739	0.02695	0.02409
0.03091	0.0363	0.02574								0.02739	0.02695	0.02409
0.03091	0.0363	0.02574								0.02739	0.02695	0.02409
0.03091	0.0363	0.02574								0.02739	0.02706	0.02409
0.03091	0.0363	0.02574								0.02739	0.02706	0.02409
0.03091	0.0363	0.02574								0.02739	0.02706	0.02409
0.03091	0.03641	0.02574								0.02739	0.02706	0.02409
0.03091	0.03641	0.02574								0.0275	0.02706	0.02409
0.03091	0.03641	0.02574								0.0275	0.02706	0.02409
0.03091	0.03641	0.02574								0.0275	0.02706	0.02409
0.03091	0.03641	0.02574								0.0275	0.02706	0.02409
0.03091	0.03641	0.02574								0.0275	0.02706	0.02409
0.03102	0.03641	0.02574								0.0275	0.02706	0.02409
0.03102	0.03641	0.02585								0.0275	0.02717	0.02409
0.03102	0.03641	0.02585								0.0275	0.02717	0.0242
0.03102	0.03641	0.02585								0.0275	0.02717	0.0242
0.03102	0.03641	0.02585								0.0275	0.02717	0.0242
0.03102	0.03641	0.02585								0.0275	0.02717	0.0242
0.03102	0.03641	0.02585								0.0275	0.02717	0.0242
0.03102	0.03652	0.02585								0.0275	0.02717	0.0242
0.03102	0.03652	0.02585								0.0275	0.02717	0.0242
0.03102	0.03652	0.02585								0.02761	0.02717	0.0242
0.03102	0.03652	0.02585								0.02761	0.02717	0.0242
0.03113	0.03652	0.02585								0.02761	0.02717	0.0242
0.03113	0.03663	0.02585								0.02761	0.02717	0.0242
0.03113	0.03663	0.02596								0.02761	0.02728	0.0242
0.03113	0.03663	0.02596								0.02761	0.02728	0.0242
0.03113	0.03663	0.02596								0.02761	0.02728	0.0242
0.03113	0.03663	0.02596								0.02761	0.02728	0.0242
0.03113	0.03663	0.02596								0.02761	0.02728	0.0242
0.03113	0.03663	0.02596								0.02761	0.02728	0.0242
0.03113	0.03663	0.02596								0.02761	0.02728	0.0242
0.03113	0.03663	0.02596								0.02761	0.02728	0.0242
0.03113	0.03663	0.02596								0.02761	0.02728	0.02431
0.03113	0.03674	0.02596								0.02761	0.02728	0.02431
0.03113	0.03674	0.02596								0.02772	0.02728	0.02431
0.03113	0.03674	0.02596								0.02772	0.02728	0.02431
0.03124	0.03674	0.02596								0.02772	0.02728	0.02431
0.03124	0.03674	0.02596								0.02772	0.02739	0.02431
0.03124	0.03674	0.02596								0.02772	0.02739	0.02431
0.03124	0.03674	0.02596								0.02772	0.02739	0.02431
0.03124	0.03674	0.02596								0.02772	0.02739	0.02431
0.03124	0.03685	0.02596								0.02772	0.02739	0.02431
0.03124	0.03685	0.02607								0.02772	0.02739	0.02431
0.03124	0.03685	0.02607								0.02772	0.02739	0.02431
0.03124	0.03685	0.02607								0.02772	0.02739	0.02431
0.03124	0.03685	0.02607								0.02772	0.02739	0.02431
0.03124	0.03685	0.02607								0.02772	0.02739	0.02431
0.03135	0.03685	0.02607								0.02772	0.02739	0.02431
0.03135	0.03685	0.02607								0.02772	0.02739	0.02431
0.03135	0.03696	0.02607								0.02783	0.02739	0.02431
0.03135	0.03696	0.02607								0.02783	0.02739	0.02442
0.03135	0.03696	0.02607								0.02783	0.02739	0.02442
0.03135	0.03696	0.02607								0.02783	0.02739	0.02442
0.03135	0.03696	0.02607								0.02783	0.02739	0.02442
0.03135	0.03696	0.02618								0.02783	0.02739	0.02442
0.03135	0.03696	0.02618								0.02783	0.02739	0.02442
0.03135	0.03696	0.02618								0.02783	0.02739	0.02442
0.03135	0.03696	0.02618								0.02783	0.0275	0.02453
0.03135	0.03696	0.02618								0.02783	0.0275	0.02453
0.03135	0.03696	0.02618								0.02794	0.0275	0.02453
0.03146	0.03696	0.02618								0.02794	0.0275	0.02453
0.03146	0.03696	0.02618								0.02794	0.0275	0.02453
0.03146	0.03707	0.02618								0.02794	0.0275	0.02453
0.03146	0.03707	0.02629								0.02794	0.0275	0.02453
0.03146	0.03707	0.02629								0.02794	0.02761	0.02453
0.03146	0.03707	0.02629								0.02794	0.02761	0.02453
0.03146	0.03707	0.02629								0.02794	0.02761	0.02453
0.03146	0.03707	0.02629								0.02794	0.02761	0.02453
0.03146	0.03707	0.02629								0.02794	0.02761	0.02453
0.03146	0.03718	0.02629								0.02794	0.02761	0.02453
0.03146	0.03718	0.02629								0.02794	0.02761	0.02453
0.03146	0.03718	0.02629								0.02805	0.02761	0.02453
0.03146	0.03718	0.02629								0.02805	0.02761	0.02464
0.03146	0.03718	0.0264								0.02805	0.02772	0.02464
0.03146	0.03718	0.0264								0.02805	0.02772	0.02464
0.03146	0.03729	0.0264								0.02805	0.02772	0.02464
0.03146	0.03729	0.0264								0.02805	0.02772	0.02464
0.03157	0.03729	0.0264								0.02805	0.02772	0.02464
0.03157	0.03729	0.0264								0.02805	0.02772	0.02464
0.03157	0.03729	0.0264								0.02816	0.02772	0.02464
0.03157	0.03729	0.0264								0.02816	0.02772	0.02464
0.03157	0.03729	0.0264								0.02816	0.02772	0.02464
0.03157	0.03729	0.0264								0.02816	0.02772	0.02464
0.03157	0.03729	0.0264								0.02816	0.02772	0.02464
0.03157	0.03729	0.0264								0.02816	0.02772	0.02464
0.03157	0.03729	0.0264								0.02816	0.02772	0.02464
0.03157	0.0374	0.0264								0.02816	0.02772	0.02475
0.03157	0.0374	0.02651								0.02816	0.02772	0.02475
0.03157	0.0374	0.02651								0.02816	0.02772	0.02475
0.03157	0.0374	0.02651								0.02816	0.02772	0.02475
0.03157	0.0374	0.02651								0.02816	0.02783	0.02475
0.03168	0.0374	0.02651								0.02816	0.02783	0.02475
0.03168	0.0374	0.02651								0.02827	0.02783	0.02475
0.03168	0.0374	0.02651								0.02827	0.02783	0.02475
0.03168	0.0374	0.02651								0.02827	0.02783	0.02475
0.03168	0.0374	0.02651								0.02827	0.02783	0.02475
0.03168	0.0374	0.02651								0.02827	0.02783	0.02475
0.03168	0.03751	0.02651								0.02827	0.02783	0.02475
0.03168	0.03751	0.02651								0.02827	0.02783	0.02475
0.03179	0.03751	0.02662								0.02827	0.02783	0.02475
0.03179	0.03751	0.02662								0.02827	0.02783	0.02486
0.03179	0.03751	0.02662								0.02827	0.02783	0.02486
0.03179	0.03751	0.02662								0.02827	0.02783	0.02486
0.03179	0.03751	0.02662								0.02827	0.02783	0.02486
0.03179	0.03751	0.02662								0.02827	0.02794	0.02486
0.03179	0.03751	0.02662								0.02827	0.02794	0.02486
0.03179	0.03751	0.02662								0.02827	0.02794	0.02486
0.03179	0.03751	0.02662								0.02838	0.02794	0.02486
0.03179	0.03762	0.02662								0.02838	0.02794	0.02486
0.03179	0.03762	0.02662								0.02838	0.02794	0.02486
0.0319	0.03762	0.02662								0.02838	0.02794	0.02486
0.0319	0.03762	0.02662								0.02838	0.02794	0.02486
0.0319	0.03762	0.02662								0.02838	0.02794	0.02486
0.0319	0.03762	0.02662								0.02838	0.02794	0.02497
0.0319	0.03762	0.02662								0.02838	0.02794	0.02497
0.0319	0.03762	0.02662								0.02838	0.02794	0.02497
0.0319	0.03773	0.02662								0.02838	0.02794	0.02497
0.0319	0.03773	0.02673								0.02838	0.02794	0.02497
0.0319	0.03773	0.02673								0.02838	0.02805	0.02497
0.0319	0.03773	0.02673								0.02838	0.02805	0.02497
0.0319	0.03773	0.02673								0.02838	0.02805	0.02497
0.0319	0.03784	0.02673								0.02838	0.02805	0.02497
0.03201	0.03784	0.02673								0.02838	0.02805	0.02497
0.03201	0.03784	0.02673								0.02838	0.02805	0.02497
0.03201	0.03784	0.02673								0.02849	0.02805	0.02497
0.03201	0.03784	0.02673								0.02849	0.02805	0.02497
0.03201	0.03795	0.02684								0.02849	0.02805	0.02497
0.03201	0.03795	0.02684								0.02849	0.02805	0.02497
0.03201	0.03795	0.02684								0.02849	0.02805	0.02497
0.03201	0.03795	0.02684								0.02849	0.02816	0.02508
0.03201	0.03795	0.02684								0.02849	0.02816	0.02508
0.03212	0.03795	0.02684								0.02849	0.02816	0.02508
0.03212	0.03795	0.02684								0.02849	0.02816	0.02508
0.03212	0.03795	0.02684								0.02849	0.02816	0.02508
0.03212	0.03795	0.02684								0.02849	0.02816	0.02508
0.03212	0.03795	0.02684								0.02849	0.02816	0.02508
0.03212	0.03795	0.02684								0.02849	0.02816	0.02508
0.03212	0.03795	0.02684								0.02849	0.02816	0.02508
0.03212	0.03795	0.02684								0.0286	0.02816	0.02508
0.03212	0.03806	0.02684								0.0286	0.02816	0.02508
0.03212	0.03806	0.02684								0.0286	0.02816	0.02508
0.03212	0.03817	0.02684								0.0286	0.02816	0.02508
0.03212	0.03817	0.02684								0.0286	0.02816	0.02508
0.03212	0.03817	0.02684								0.0286	0.02816	0.02508
0.03212	0.03817	0.02684								0.0286	0.02827	0.02508
0.03212	0.03817	0.02684								0.0286	0.02827	0.02508
0.03212	0.03817	0.02695								0.0286	0.02827	0.02508
0.03223	0.03817	0.02695								0.0286	0.02827	0.02508
0.03223	0.03817	0.02695								0.0286	0.02827	0.02508
0.03223	0.03828	0.02695								0.0286	0.02827	0.02519
0.03223	0.03828	0.02695								0.02871	0.02827	0.02519
0.03223	0.03828	0.02695								0.02871	0.02827	0.02519
0.03223	0.03828	0.02695								0.02871	0.02827	0.02519
0.03223	0.03828	0.02695								0.02871	0.02827	0.02519
0.03223	0.03828	0.02695								0.02871	0.02827	0.02519
0.03234	0.03828	0.02695								0.02871	0.02827	0.02519
0.03234	0.03828	0.02695								0.02871	0.02827	0.02519
0.03234	0.03839	0.02695								0.02871	0.02827	0.02519
0.03234	0.03839	0.02695								0.02871	0.02827	0.02519
0.03234	0.03839	0.02695								0.02871	0.02827	0.02519
0.03234	0.03839	0.02695								0.02871	0.02827	0.02519
0.03234	0.03839	0.02706								0.02871	0.02838	0.02519
0.03234	0.03839	0.02706								0.02871	0.02838	0.02519
0.03234	0.0385	0.02706								0.02871	0.02838	0.02519
0.03234	0.0385	0.02706								0.02871	0.02838	0.02519
0.03234	0.0385	0.02706								0.02871	0.02838	0.02519
0.03234	0.0385	0.02706								0.02882	0.02838	0.02519
0.03234	0.03861	0.02706								0.02882	0.02838	0.02519
0.03245	0.03861	0.02706								0.02882	0.02838	0.02519
0.03245	0.03861	0.02706								0.02882	0.02838	0.02519
0.03245	0.03861	0.02706								0.02882	0.02838	0.0253
0.03245	0.03861	0.02706								0.02882	0.02838	0.0253
0.03245	0.03861	0.02706								0.02882	0.02838	0.0253
0.03245	0.03861	0.02706								0.02882	0.02838	0.0253
0.03245	0.03872	0.02706								0.02882	0.02838	0.0253
0.03245	0.03872	0.02706								0.02882	0.02838	0.0253
0.03245	0.03872	0.02717								0.02893	0.02838	0.0253
0.03245	0.03872	0.02717								0.02893	0.02849	0.0253
0.03245	0.03872	0.02717								0.02893	0.02849	0.0253
0.03245	0.03872	0.02717								0.02893	0.02849	0.0253
0.03245	0.03883	0.02717								0.02893	0.02849	0.0253
0.03245	0.03883	0.02717								0.02893	0.02849	0.0253
0.03245	0.03883	0.02717								0.02893	0.02849	0.0253
0.03245	0.03883	0.02717								0.02893	0.02849	0.0253
0.03256	0.03883	0.02717								0.02893	0.02849	0.0253
0.03256	0.03883	0.02717								0.02893	0.02849	0.0253
0.03256	0.03883	0.02717								0.02893	0.02849	0.02541
0.03256	0.03883	0.02717								0.02893	0.02849	0.02541
0.03256	0.03883	0.02717								0.02904	0.02849	0.02541
0.03256	0.03883	0.02717								0.02904	0.02849	0.02541
0.03256	0.03894	0.02717								0.02904	0.0286	0.02541
0.03256	0.03894	0.02717								0.02904	0.0286	0.02541
0.03256	0.03894	0.02717								0.02904	0.0286	0.02541
0.03256	0.03894	0.02717								0.02904	0.0286	0.02541
0.03267	0.03894	0.02717								0.02904	0.0286	0.02541
0.03267	0.03894	0.02717								0.02904	0.0286	0.02541
0.03267	0.03894	0.02728								0.02904	0.0286	0.02541
0.03267	0.03894	0.02728								0.02904	0.0286	0.02541
0.03267	0.03894	0.02728								0.02904	0.0286	0.02541
0.03267	0.03905	0.02728								0.02904	0.0286	0.02541
0.03267	0.03905	0.02728								0.02904	0.0286	0.02541
0.03267	0.03905	0.02728								0.02904	0.0286	0.02541
0.03267	0.03905	0.02728								0.02915	0.0286	0.02552
0.03267	0.03905	0.02728								0.02915	0.0286	0.02552
0.03267	0.03905	0.02728								0.02915	0.0286	0.02552
0.03278	0.03905	0.02728								0.02915	0.0286	0.02552
0.03278	0.03905	0.02728								0.02915	0.02871	0.02552
0.03278	0.03905	0.02728								0.02915	0.02871	0.02552
0.03278	0.03905	0.02728								0.02915	0.02871	0.02552
0.03278	0.03905	0.02728								0.02915	0.02871	0.02552
0.03278	0.03905	0.02728								0.02915	0.02871	0.02552
0.03278	0.03905	0.02728								0.02915	0.02871	0.02552
0.03278	0.03916	0.02728								0.02915	0.02871	0.02552
0.03278	0.03916	0.02728								0.02915	0.02871	0.02563
0.03289	0.03916	0.02728								0.02915	0.02871	0.02563
0.03289	0.03916	0.02728								0.02915	0.02871	0.02563
0.03289	0.03916	0.02739								0.02926	0.02871	0.02563
0.03289	0.03916	0.02739								0.02926	0.02882	0.02563
0.03289	0.03916	0.02739								0.02926	0.02882	0.02563
0.03289	0.03916	0.02739								0.02926	0.02882	0.02563
0.03289	0.03916	0.02739								0.02926	0.02882	0.02563
0.03289	0.03916	0.02739								0.02926	0.02882	0.02563
0.03289	0.03916	0.02739								0.02926	0.02882	0.02563
0.03289	0.03916	0.02739								0.02926	0.02882	0.02563
0.03289	0.03927	0.02739								0.02926	0.02882	0.02563
0.03289	0.03927	0.0275								0.02926	0.02882	0.02563
0.03289	0.03927	0.0275								0.02926	0.02893	0.02574
0.033	0.03927	0.0275								0.02926	0.02893	0.02574
0.033	0.03927	0.0275								0.02926	0.02893	0.02574
0.033	0.03927	0.0275								0.02926	0.02893	0.02574
0.033	0.03927	0.0275								0.02926	0.02893	0.02574
0.033	0.03927	0.0275								0.02926	0.02893	0.02574
0.033	0.03927	0.0275								0.02926	0.02893	0.02574
0.033	0.03927	0.0275								0.02937	0.02893	0.02574
0.033	0.03938	0.0275								0.02937	0.02893	0.02574
0.033	0.03938	0.0275								0.02937	0.02893	0.02574
0.033	0.03938	0.0275								0.02937	0.02893	0.02574
0.033	0.03938	0.0275								0.02937	0.02904	0.02574
0.033	0.03949	0.0275								0.02937	0.02904	0.02574
0.033	0.03949	0.0275								0.02937	0.02904	0.02585
0.033	0.03949	0.0275								0.02937	0.02904	0.02585
0.03311	0.03949	0.0275								0.02937	0.02904	0.02585
0.03311	0.03949	0.02761								0.02937	0.02904	0.02585
0.03311	0.03949	0.02761								0.02937	0.02904	0.02585
0.03311	0.03949	0.02761								0.02937	0.02904	0.02585
0.03311	0.03949	0.02761								0.02937	0.02904	0.02585
0.03311	0.03949	0.02761								0.02937	0.02904	0.02585
0.03311	0.03949	0.02772								0.02937	0.02904	0.02596
0.03311	0.03949	0.02772								0.02937	0.02904	0.02596
0.03311	0.03949	0.02772								0.02937	0.02904	0.02596
0.03311	0.03949	0.02772								0.02937	0.02915	0.02596
0.03311	0.0396	0.02772								0.02937	0.02915	0.02596
0.03311	0.0396	0.02772								0.02948	0.02915	0.02596
0.03322	0.0396	0.02772								0.02948	0.02915	0.02596
0.03322	0.0396	0.02772								0.02948	0.02915	0.02596
0.03322	0.0396	0.02772								0.02948	0.02915	0.02596
0.03322	0.0396	0.02772								0.02948	0.02915	0.02596
0.03322	0.0396	0.02783								0.02948	0.02915	0.02596
0.03322	0.0396	0.02783								0.02948	0.02915	0.02596
0.03322	0.0396	0.02783								0.02948	0.02915	0.02596
0.03322	0.0396	0.02783								0.02948	0.02915	0.02596
0.03333	0.03971	0.02783								0.02948	0.02915	0.02596
0.03333	0.03971	0.02783								0.02948	0.02915	0.02607
0.03333	0.03971	0.02783								0.02948	0.02915	0.02607
0.03333	0.03971	0.02783								0.02948	0.02915	0.02607
0.03333	0.03982	0.02783								0.02959	0.02915	0.02607
0.03333	0.03982	0.02783								0.02959	0.02915	0.02607
0.03333	0.03982	0.02783								0.02959	0.02926	0.02607
0.03333	0.03982	0.02783								0.02959	0.02926	0.02607
0.03333	0.03982	0.02783								0.02959	0.02926	0.02607
0.03344	0.03982	0.02783								0.02959	0.02926	0.02607
0.03344	0.03982	0.02794								0.02959	0.02926	0.02607
0.03344	0.03982	0.02794								0.02959	0.02926	0.02607
0.03344	0.03982	0.02794								0.02959	0.02926	0.02607
0.03344	0.03982	0.02794								0.02959	0.02926	0.02618
0.03344	0.03982	0.02794								0.02959	0.02926	0.02618
0.03344	0.03982	0.02794								0.02959	0.02926	0.02618
0.03344	0.03993	0.02794								0.02959	0.02926	0.02618
0.03344	0.03993	0.02794								0.02959	0.02926	0.02618
0.03344	0.03993	0.02794								0.02959	0.02926	0.02618
0.03344	0.03993	0.02794								0.02959	0.02926	0.02618
0.03344	0.03993	0.02805								0.02959	0.02926	0.02618
0.03344	0.03993	0.02805								0.0297	0.02926	0.02618
0.03344	0.03993	0.02805								0.0297	0.02926	0.02618
0.03344	0.04004	0.02805								0.0297	0.02926	0.02629
0.03344	0.04004	0.02805								0.0297	0.02937	0.02629
0.03355	0.04004	0.02805								0.0297	0.02937	0.02629
0.03355	0.04004	0.02805								0.0297	0.02937	0.02629
0.03355	0.04004	0.02805								0.0297	0.02937	0.02629
0.03355	0.04004	0.02805								0.0297	0.02937	0.02629
0.03355	0.04004	0.02805								0.0297	0.02937	0.02629
0.03355	0.04004	0.02805								0.0297	0.02937	0.02629
0.03355	0.04004	0.02805								0.0297	0.02937	0.02629
0.03355	0.04004	0.02805								0.0297	0.02937	0.02629
0.03355	0.04004	0.02805								0.0297	0.02948	0.02629
0.03355	0.04004	0.02805								0.0297	0.02948	0.02629
0.03355	0.04004	0.02805								0.02981	0.02948	0.02629
0.03355	0.04015	0.02805								0.02981	0.02948	0.02629
0.03355	0.04015	0.02805								0.02981	0.02948	0.02629
0.03355	0.04015	0.02805								0.02981	0.02948	0.02629
0.03355	0.04015	0.02805								0.02981	0.02948	0.02629
0.03355	0.04015	0.02816								0.02981	0.02948	0.02629
0.03355	0.04015	0.02816								0.02981	0.02948	0.0264
0.03355	0.04015	0.02816								0.02981	0.02948	0.0264
0.03355	0.04015	0.02816								0.02981	0.02948	0.0264
0.03355	0.04015	0.02816								0.02981	0.02948	0.0264
0.03366	0.04015	0.02816								0.02981	0.02948	0.0264
0.03366	0.04026	0.02816								0.02981	0.02959	0.0264
0.03366	0.04026	0.02816								0.02992	0.02959	0.0264
0.03366	0.04026	0.02816								0.02992	0.02959	0.0264
0.03366	0.04026	0.02816								0.02992	0.02959	0.0264
0.03366	0.04026	0.02816								0.02992	0.02959	0.0264
0.03366	0.04026	0.02816								0.02992	0.02959	0.0264
0.03366	0.04026	0.02827								0.02992	0.02959	0.0264
0.03366	0.04026	0.02827								0.02992	0.02959	0.0264
0.03366	0.04026	0.02827								0.02992	0.02959	0.0264
0.03366	0.04037	0.02827								0.02992	0.02959	0.0264
0.03366	0.04037	0.02827								0.02992	0.02959	0.0264
0.03366	0.04037	0.02827								0.02992	0.02959	0.0264
0.03377	0.04037	0.02827								0.02992	0.02959	0.02651
0.03377	0.04037	0.02827								0.02992	0.02959	0.02651
0.03377	0.04037	0.02827								0.02992	0.02959	0.02651
0.03377	0.04037	0.02827								0.02992	0.0297	0.02651
0.03377	0.04048	0.02827								0.02992	0.0297	0.02651
0.03377	0.04048	0.02827								0.02992	0.0297	0.02651
0.03377	0.04048	0.02827								0.02992	0.0297	0.02651
0.03377	0.04048	0.02838								0.02992	0.0297	0.02651
0.03377	0.04048	0.02838								0.03003	0.0297	0.02651
0.03377	0.04048	0.02838								0.03003	0.0297	0.02651
0.03377	0.04048	0.02838								0.03003	0.0297	0.02651
0.03388	0.04059	0.02838								0.03003	0.0297	0.02651
0.03388	0.04059	0.02838								0.03003	0.0297	0.02651
0.03388	0.04059	0.02838								0.03003	0.0297	0.02651
0.03388	0.04059	0.02838								0.03003	0.0297	0.02651
0.03388	0.04059	0.02838								0.03003	0.0297	0.02662
0.03388	0.04059	0.02838								0.03003	0.0297	0.02662
0.03388	0.04059	0.02849								0.03003	0.0297	0.02662
0.03388	0.04059	0.02849								0.03003	0.02981	0.02662
0.03388	0.04059	0.02849								0.03003	0.02981	0.02662
0.03388	0.04059	0.02849								0.03003	0.02981	0.02662
0.03388	0.04059	0.02849								0.03003	0.02981	0.02662
0.03388	0.0407	0.02849								0.03003	0.02981	0.02662
0.03388	0.0407	0.02849								0.03003	0.02981	0.02662
0.03388	0.0407	0.02849								0.03003	0.02981	0.02662
0.03388	0.0407	0.02849								0.03014	0.02981	0.02662
0.03388	0.0407	0.02849								0.03014	0.02981	0.02662
0.03399	0.0407	0.02849								0.03014	0.02981	0.02662
0.03399	0.0407	0.0286								0.03014	0.02981	0.02662
0.03399	0.0407	0.0286								0.03014	0.02981	0.02662
0.03399	0.0407	0.0286								0.03014	0.02981	0.02662
0.03399	0.0407	0.0286								0.03014	0.02981	0.02662
0.03399	0.0407	0.0286								0.03014	0.02981	0.02662
0.03399	0.0407	0.0286								0.03014	0.02981	0.02662
0.03399	0.0407	0.0286								0.03014	0.02981	0.02662
0.03399	0.04081	0.0286								0.03025	0.02981	0.02662
0.0341	0.04081	0.0286								0.03025	0.02981	0.02662
0.0341	0.04081	0.0286								0.03025	0.02981	0.02673
0.0341	0.04081	0.02871								0.03025	0.02981	0.02673
0.0341	0.04081	0.02871								0.03025	0.02992	0.02673
0.0341	0.04081	0.02871								0.03025	0.02992	0.02673
0.0341	0.04081	0.02871								0.03025	0.02992	0.02673
0.03421	0.04092	0.02871								0.03025	0.02992	0.02673
0.03421	0.04092	0.02871								0.03025	0.02992	0.02673
0.03421	0.04092	0.02871								0.03025	0.02992	0.02673
0.03421	0.04092	0.02871								0.03025	0.02992	0.02673
0.03421	0.04092	0.02871								0.03025	0.02992	0.02673
0.03421	0.04092	0.02871								0.03025	0.02992	0.02673
0.03421	0.04092	0.02871								0.03025	0.02992	0.02673
0.03432	0.04103	0.02871								0.03025	0.02992	0.02673
0.03432	0.04103	0.02871								0.03025	0.02992	0.02673
0.03432	0.04103	0.02871								0.03025	0.03003	0.02673
0.03432	0.04103	0.02871								0.03025	0.03003	0.02673
0.03432	0.04103	0.02871								0.03025	0.03003	0.02673
0.03432	0.04103	0.02871								0.03025	0.03003	0.02684
0.03432	0.04103	0.02882								0.03025	0.03003	0.02684
0.03432	0.04114	0.02882								0.03025	0.03003	0.02684
0.03432	0.04114	0.02882								0.03025	0.03003	0.02684
0.03432	0.04114	0.02882								0.03025	0.03003	0.02684
0.03432	0.04114	0.02882								0.03025	0.03003	0.02684
0.03432	0.04114	0.02882								0.03025	0.03003	0.02684
0.03432	0.04114	0.02882								0.03025	0.03003	0.02684
0.03432	0.04114	0.02882								0.03025	0.03003	0.02684
[truncated: 89,470 more rows]
