# Supplementary material for: Membrane-mediated dimerization potentiates PIP5K lipid kinase activity
Source: eLife. 2022 Aug 17;11:e73747. doi: 10.7554/eLife.73747 (PMC9470164; doi:10.7554/eLife.73747)
Supplement: Figure 3—source data 1. [file elife-73747-fig3-data1.xlsx]

## Sheet: Figure 3C
Figure 3C
Single molecule dwell times for Ax647-5KB (raw data, sorted) units = sec												Cumulative frequency distributions for Ax647-5KB dwell times
mov 1 (1% PIP2)	mov 2 (1% PIP2)	mov 3 (1% PIP2)		mov 1 (2% PIP2)	mov 2 (2% PIP2)	mov 3 (2% PIP2)		mov 1 (4% PIP2)	mov 2 (4% PIP2)	mov 3 (4% PIP2)		time (sec) Bin Center	mov 1 (1% PIP2)	mov 2 (1% PIP2)	mov 3 (1% PIP2)		time (sec) Bin Center	mov 1 (2% PIP2)	mov 2 (2% PIP2)	mov 3 (2% PIP2)		time (sec) Bin Center	mov 1 (4% PIP2)	mov 2 (4% PIP2)	mov 3 (4% PIP2)		FINAL STATISTICS
0.05	0.05	0.05		0.2	0.2	0.2		0.2	0.2	0.2		0	0	0	0		0	0	0	0		0	0	0	0		Ax647-5KB(1% PIP2)_DWELL TIMES	movie	mov1	mov2	mov3	AVE	SD
0.05	0.05	0.05		0.2	0.2	0.2		0.2	0.2	0.2		0.05	0.485448	0.468584	0.467794		0.1	0	0	0		0.1	0	0	0			T1	0.09055	0.09904	0.09975	0.0964467	0.00511899
0.05	0.05	0.05		0.2	0.2	0.2		0.2	0.2	0.2		0.1	0.691502	0.668433	0.671498		0.2	0.237838	0.202363	0.164518		0.2	0.131707	0.118936	0.123123			N	859	1321	1242	3422
0.05	0.05	0.05		0.2	0.2	0.2		0.2	0.2	0.2		0.15	0.804424	0.766086	0.772142		0.3	0.362162	0.358936	0.291387		0.3	0.217886	0.194053	0.220721
0.05	0.05	0.05		0.2	0.2	0.2		0.2	0.2	0.2		0.2	0.859139	0.837245	0.834138		0.4	0.491892	0.469719	0.395049		0.4	0.299187	0.286385	0.295796		Ax647-5KB(2% PIP2)_DWELL TIMES	movie	mov1	mov2	mov3	AVE	SD
0.05	0.05	0.05		0.2	0.2	0.2		0.2	0.2	0.2		0.25	0.901048	0.887207	0.876812		0.5	0.590991	0.561792	0.48788		0.5	0.35935	0.350548	0.358859			T1	0.5688	0.6088	0.7436	0.6404	0.0915843
0.05	0.05	0.05		0.2	0.2	0.2		0.2	0.2	0.2		0.3	0.920838	0.922029	0.917874		0.6	0.663063	0.643525	0.564724		0.6	0.398374	0.399061	0.40991			N	555	2031	1939	4525
0.05	0.05	0.05		0.2	0.2	0.2		0.2	0.2	0.2		0.35	0.942957	0.934141	0.929952		0.7	0.733333	0.706056	0.631253		0.7	0.452033	0.43975	0.457958
0.05	0.05	0.05		0.2	0.2	0.2		0.2	0.2	0.2		0.4	0.954598	0.948524	0.940419		0.8	0.774775	0.753323	0.674575		0.8	0.492683	0.488263	0.483483		Ax647-5KB(4% PIP2)_DWELL TIMES	movie	mov1	mov2	mov3	AVE	SD
0.05	0.05	0.05		0.2	0.2	0.2		0.2	0.2	0.2		0.45	0.959255	0.955337	0.947665		0.9	0.818018	0.797637	0.71016		0.9	0.533333	0.517997	0.522523			alpha	0.5898	0.6561	0.5315	0.592467	0.0623428
0.05	0.05	0.05		0.2	0.2	0.2		0.2	0.2	0.2		0.5	0.967404	0.961393	0.951691		1	0.845045	0.830133	0.744198		1	0.557724	0.550861	0.56006			T1	0.7279	0.8287	0.6526	0.7364	0.0883572
0.05	0.05	0.05		0.2	0.2	0.2		0.2	0.2	0.2		0.55	0.972061	0.965178	0.958132		1.1	0.861261	0.851797	0.778236		1.1	0.58374	0.574335	0.57958			T2	3.341	3.759	3.197	3.43233	0.29192
0.05	0.05	0.05		0.2	0.2	0.2		0.2	0.2	0.2		0.6	0.973225	0.971991	0.962963		1.2	0.882883	0.872969	0.80557		1.2	0.609756	0.600939	0.599099			N	615	639	666	1920
0.05	0.05	0.05		0.2	0.2	0.2		0.2	0.2	0.2		0.65	0.975553	0.975019	0.964573		1.3	0.899099	0.892664	0.831872		1.3	0.635772	0.622848	0.618619
0.05	0.05	0.05		0.2	0.2	0.2		0.2	0.2	0.2		0.7	0.977881	0.979561	0.965378		1.4	0.920721	0.913343	0.861784		1.4	0.647154	0.635368	0.641141
0.05	0.05	0.05		0.2	0.2	0.2		0.2	0.2	0.2		0.75	0.98021	0.982589	0.970209		1.5	0.936937	0.923191	0.884992		1.5	0.655285	0.657277	0.653153
0.05	0.05	0.05		0.2	0.2	0.2		0.2	0.2	0.2		0.8	0.98021	0.984103	0.972625		1.6	0.956757	0.933038	0.899948		1.6	0.669919	0.676056	0.672673
0.05	0.05	0.05		0.2	0.2	0.2		0.2	0.2	0.2		0.85	0.982538	0.985617	0.977456		1.7	0.972973	0.939439	0.912842		1.7	0.691057	0.697966	0.687688
0.05	0.05	0.05		0.2	0.2	0.2		0.2	0.2	0.2		0.9	0.983702	0.986374	0.981481		1.8	0.976577	0.945839	0.922125		1.8	0.707317	0.70892	0.693694
0.05	0.05	0.05		0.2	0.2	0.2		0.2	0.2	0.2		0.95	0.983702	0.988645	0.981481		1.9	0.98018	0.955687	0.931408		1.9	0.725203	0.716745	0.714715
0.05	0.05	0.05		0.2	0.2	0.2		0.2	0.2	0.2		1	0.984866	0.988645	0.982287		2	0.981982	0.961103	0.938112		2	0.734959	0.729264	0.726727
0.05	0.05	0.05		0.2	0.2	0.2		0.2	0.2	0.2		1.05	0.98603	0.988645	0.984702		2.1	0.983784	0.967996	0.944301		2.1	0.734959	0.755869	0.735736
0.05	0.05	0.05		0.2	0.2	0.2		0.2	0.2	0.2		1.1	0.988359	0.989402	0.985507		2.2	0.987387	0.970458	0.949458		2.2	0.747967	0.771518	0.747748
0.05	0.05	0.05		0.2	0.2	0.2		0.2	0.2	0.2		1.15	0.988359	0.989402	0.987118		2.3	0.989189	0.974397	0.956679		2.3	0.762602	0.780908	0.752252
0.05	0.05	0.05		0.2	0.2	0.2		0.2	0.2	0.2		1.2	0.988359	0.990916	0.988728		2.4	0.992793	0.975874	0.961836		2.4	0.77561	0.785603	0.75976
0.05	0.05	0.05		0.2	0.2	0.2		0.2	0.2	0.2		1.25	0.989523	0.991673	0.989533		2.5	0.996396	0.979813	0.96854		2.5	0.785366	0.796557	0.768769
0.05	0.05	0.05		0.2	0.2	0.2		0.2	0.2	0.2		1.3	0.990687	0.993187	0.989533		2.6	0.998198	0.98129	0.969572		2.6	0.795122	0.802817	0.777778
0.05	0.05	0.05		0.2	0.2	0.2		0.2	0.2	0.2		1.35	0.990687	0.994701	0.991143		2.7	1	0.983259	0.972666		2.7	0.796748	0.812207	0.785285
0.05	0.05	0.05		0.2	0.2	0.2		0.2	0.2	0.2		1.4	0.990687	0.994701	0.991948		2.8		0.985721	0.974729		2.8	0.809756	0.818466	0.797297
0.05	0.05	0.05		0.2	0.2	0.2		0.2	0.2	0.2		1.45	0.990687	0.995458	0.993559		2.9		0.985721	0.977824		2.9	0.813008	0.821596	0.806306
0.05	0.05	0.05		0.2	0.2	0.2		0.2	0.2	0.2		1.5	0.990687	0.995458	0.993559		3		0.988676	0.979371		3	0.826016	0.832551	0.812312
0.05	0.05	0.05		0.2	0.2	0.2		0.2	0.2	0.2		1.55	0.990687	0.995458	0.993559		3.1		0.98966	0.981949		3.1	0.830894	0.835681	0.818318
0.05	0.05	0.05		0.2	0.2	0.2		0.2	0.2	0.2		1.6	0.991851	0.995458	0.995169		3.2		0.990645	0.983497		3.2	0.835772	0.84507	0.81982
0.05	0.05	0.05		0.2	0.2	0.2		0.2	0.2	0.2		1.65	0.991851	0.995458	0.995169		3.3		0.99163	0.985044		3.3	0.843902	0.849765	0.824324
0.05	0.05	0.05		0.2	0.2	0.2		0.2	0.2	0.2		1.7	0.991851	0.995458	0.995974		3.4		0.993107	0.98556		3.4	0.850407	0.85133	0.83033
0.05	0.05	0.05		0.2	0.2	0.2		0.2	0.2	0.2		1.75	0.991851	0.995458	0.995974		3.5		0.994584	0.98556		3.5	0.853659	0.85759	0.836336
0.05	0.05	0.05		0.2	0.2	0.2		0.2	0.2	0.2		1.8	0.993015	0.996215	0.995974		3.6		0.995076	0.986591		3.6	0.860163	0.862285	0.845345
0.05	0.05	0.05		0.2	0.2	0.2		0.2	0.2	0.2		1.85	0.993015	0.996215	0.996779		3.7		0.996061	0.987107		3.7	0.865041	0.862285	0.84985
0.05	0.05	0.05		0.2	0.2	0.2		0.2	0.2	0.2		1.9	0.994179	0.996215	0.996779		3.8		0.997046	0.988654		3.8	0.866667	0.865415	0.855856
0.05	0.05	0.05		0.2	0.2	0.2		0.2	0.2	0.2		1.95	0.994179	0.996215	0.996779		3.9		0.997538	0.989685		3.9	0.869919	0.86698	0.858859
0.05	0.05	0.05		0.2	0.2	0.2		0.2	0.2	0.2		2	0.994179	0.997729	0.996779		4		0.997538	0.990201		4	0.874797	0.871674	0.864865
0.05	0.05	0.05		0.2	0.2	0.2		0.2	0.2	0.2		2.05	0.995343	0.997729	0.996779		4.1		0.998031	0.990201		4.1	0.879675	0.873239	0.869369
0.05	0.05	0.05		0.2	0.2	0.2		0.2	0.2	0.2		2.1	0.995343	0.997729	0.996779		4.2		0.998523	0.990717		4.2	0.886179	0.876369	0.873874
0.05	0.05	0.05		0.2	0.2	0.2		0.2	0.2	0.2		2.15	0.996508	0.998486	0.996779		4.3		0.999015	0.991748		4.3	0.886179	0.877934	0.875375
0.05	0.05	0.05		0.2	0.2	0.2		0.2	0.2	0.2		2.2	0.996508	0.998486	0.99839		4.4		0.999015	0.991748		4.4	0.894309	0.879499	0.876877
0.05	0.05	0.05		0.2	0.2	0.2		0.2	0.2	0.2		2.25	0.996508	0.999243	0.99839		4.5		0.999015	0.993296		4.5	0.897561	0.882629	0.876877
0.05	0.05	0.05		0.2	0.2	0.2		0.2	0.2	0.2		2.3	0.996508	0.999243	0.99839		4.6		0.999508	0.995874		4.6	0.902439	0.888889	0.878378
0.05	0.05	0.05		0.2	0.2	0.2		0.2	0.2	0.2		2.35	0.996508	0.999243	0.999195		4.7		0.999508	0.995874		4.7	0.904065	0.892019	0.89039
0.05	0.05	0.05		0.2	0.2	0.2		0.2	0.2	0.2		2.4	0.996508	0.999243	0.999195		4.8		0.999508	0.99639		4.8	0.904065	0.895149	0.891892
0.05	0.05	0.05		0.2	0.2	0.2		0.2	0.2	0.2		2.45	0.997672	0.999243	0.999195		4.9		0.999508	0.996906		4.9	0.907317	0.898279	0.900901
0.05	0.05	0.05		0.2	0.2	0.2		0.2	0.2	0.2		2.5	0.997672	0.999243	0.999195		5		0.999508	0.996906		5	0.910569	0.901408	0.902402
0.05	0.05	0.05		0.2	0.2	0.2		0.2	0.2	0.2		2.55	0.997672	0.999243	0.999195		5.1		0.999508	0.996906		5.1	0.910569	0.904538	0.908408
0.05	0.05	0.05		0.2	0.2	0.2		0.2	0.2	0.2		2.6	0.997672	0.999243	0.999195		5.2		0.999508	0.997421		5.2	0.910569	0.907668	0.90991
0.05	0.05	0.05		0.2	0.2	0.2		0.2	0.2	0.2		2.65	0.997672	0.999243	0.999195		5.3		0.999508	0.997421		5.3	0.910569	0.910798	0.915916
0.05	0.05	0.05		0.2	0.2	0.2		0.2	0.2	0.2		2.7	0.997672	0.999243	0.999195		5.4		0.999508	0.997937		5.4	0.913821	0.913928	0.917417
0.05	0.05	0.05		0.2	0.2	0.2		0.2	0.2	0.2		2.75	0.997672	1	0.999195		5.5		0.999508	0.997937		5.5	0.913821	0.915493	0.918919
0.05	0.05	0.05		0.2	0.2	0.2		0.2	0.2	0.2		2.8	0.997672		0.999195		5.6		0.999508	0.997937		5.6	0.915447	0.920188	0.921922
0.05	0.05	0.05		0.2	0.2	0.2		0.2	0.2	0.2		2.85	0.997672		0.999195		5.7		0.999508	0.997937		5.7	0.918699	0.920188	0.921922
0.05	0.05	0.05		0.2	0.2	0.2		0.2	0.2	0.2		2.9	0.997672		0.999195		5.8		0.999508	0.997937		5.8	0.921951	0.923318	0.924925
0.05	0.05	0.05		0.2	0.2	0.2		0.2	0.2	0.2		2.95	0.997672		0.999195		5.9		0.999508	0.997937		5.9	0.921951	0.926448	0.924925
0.05	0.05	0.05		0.2	0.2	0.2		0.2	0.2	0.2		3	0.998836		0.999195		6		0.999508	0.998453		6	0.925203	0.926448	0.926426
0.05	0.05	0.05		0.2	0.2	0.2		0.2	0.2	0.2		3.05	0.998836		0.999195		6.1		1	0.998453		6.1	0.926829	0.929577	0.929429
0.05	0.05	0.05		0.2	0.2	0.2		0.2	0.2	0.2		3.1	1		0.999195		6.2			0.998453		6.2	0.930081	0.931142	0.930931
0.05	0.05	0.05		0.2	0.2	0.2		0.2	0.2	0.2		3.15			1		6.3			0.998453		6.3	0.930081	0.932707	0.930931
0.05	0.05	0.05		0.2	0.2	0.2		0.2	0.2	0.2							6.4			0.998453		6.4	0.933333	0.932707	0.933934
0.05	0.05	0.05		0.2	0.2	0.2		0.2	0.2	0.2							6.5			0.998453		6.5	0.934959	0.932707	0.935435
0.05	0.05	0.05		0.2	0.2	0.2		0.2	0.2	0.2							6.6			0.998453		6.6	0.936585	0.934272	0.936937
0.05	0.05	0.05		0.2	0.2	0.2		0.2	0.2	0.2							6.7			0.998453		6.7	0.941463	0.938967	0.938438
0.05	0.05	0.05		0.2	0.2	0.2		0.2	0.2	0.2							6.8			0.998453		6.8	0.944715	0.940532	0.93994
0.05	0.05	0.05		0.2	0.2	0.2		0.2	0.2	0.2							6.9			0.999484		6.9	0.944715	0.940532	0.93994
0.05	0.05	0.05		0.2	0.2	0.2		0.2	0.2	0.2							7			0.999484		7	0.95122	0.943662	0.93994
0.05	0.05	0.05		0.2	0.2	0.2		0.2	0.2	0.2							7.1			0.999484		7.1	0.952846	0.946792	0.942943
0.05	0.05	0.05		0.2	0.2	0.2		0.2	0.2	0.2							7.2			0.999484		7.2	0.952846	0.948357	0.945946
0.05	0.05	0.05		0.2	0.2	0.2		0.2	0.2	0.2							7.3			0.999484		7.3	0.954472	0.948357	0.95045
0.05	0.05	0.05		0.2	0.2	0.2		0.2	0.2	0.2							7.4			0.999484		7.4	0.956098	0.954617	0.953453
0.05	0.05	0.05		0.2	0.2	0.2		0.2	0.2	0.2							7.5			0.999484		7.5	0.95935	0.960876	0.954955
0.05	0.05	0.05		0.2	0.2	0.2		0.2	0.3	0.2							7.6			0.999484		7.6	0.960976	0.962441	0.954955
0.05	0.05	0.05		0.2	0.2	0.2		0.2	0.3	0.2							7.7			0.999484		7.7	0.962602	0.967136	0.956456
0.05	0.05	0.05		0.2	0.2	0.2		0.2	0.3	0.2							7.8			0.999484		7.8	0.962602	0.967136	0.956456
0.05	0.05	0.05		0.2	0.2	0.2		0.2	0.3	0.2							7.9			0.999484		7.9	0.962602	0.967136	0.957958
0.05	0.05	0.05		0.2	0.2	0.2		0.2	0.3	0.2							8			0.999484		8	0.962602	0.970266	0.957958
0.05	0.05	0.05		0.2	0.2	0.2		0.3	0.3	0.2							8.1			0.999484		8.1	0.962602	0.970266	0.959459
0.05	0.05	0.05		0.2	0.2	0.2		0.3	0.3	0.3							8.2			0.999484		8.2	0.965854	0.971831	0.959459
0.05	0.05	0.05		0.2	0.2	0.2		0.3	0.3	0.3							8.3			0.999484		8.3	0.96748	0.971831	0.960961
0.05	0.05	0.05		0.2	0.2	0.2		0.3	0.3	0.3							8.4			0.999484		8.4	0.96748	0.973396	0.962462
0.05	0.05	0.05		0.2	0.2	0.2		0.3	0.3	0.3							8.5			0.999484		8.5	0.970732	0.973396	0.965465
0.05	0.05	0.05		0.2	0.2	0.2		0.3	0.3	0.3							8.6			0.999484		8.6	0.973984	0.973396	0.965465
0.05	0.05	0.05		0.2	0.2	0.2		0.3	0.3	0.3							8.7			0.999484		8.7	0.97561	0.974961	0.966967
0.05	0.05	0.05		0.2	0.2	0.2		0.3	0.3	0.3							8.8			0.999484		8.8	0.97561	0.974961	0.966967
0.05	0.05	0.05		0.2	0.2	0.2		0.3	0.3	0.3							8.9			1		8.9	0.977236	0.974961	0.968468
0.05	0.05	0.05		0.2	0.2	0.2		0.3	0.3	0.3												9	0.977236	0.974961	0.96997
0.05	0.05	0.05		0.2	0.2	0.2		0.3	0.3	0.3												9.1	0.977236	0.974961	0.96997
0.05	0.05	0.05		0.2	0.2	0.2		0.3	0.3	0.3												9.2	0.978862	0.974961	0.974474
0.05	0.05	0.05		0.2	0.2	0.2		0.3	0.3	0.3												9.3	0.980488	0.974961	0.977477
0.05	0.05	0.05		0.2	0.2	0.2		0.3	0.3	0.3												9.4	0.980488	0.976526	0.98048
0.05	0.05	0.05		0.2	0.2	0.2		0.3	0.3	0.3												9.5	0.980488	0.976526	0.98048
0.05	0.05	0.05		0.2	0.2	0.2		0.3	0.3	0.3												9.6	0.980488	0.978091	0.98048
0.05	0.05	0.05		0.2	0.2	0.2		0.3	0.3	0.3												9.7	0.980488	0.978091	0.981982
0.05	0.05	0.05		0.2	0.2	0.2		0.3	0.3	0.3												9.8	0.980488	0.979656	0.984985
0.05	0.05	0.05		0.2	0.2	0.2		0.3	0.3	0.3												9.9	0.980488	0.979656	0.986486
0.05	0.05	0.05		0.2	0.2	0.2		0.3	0.3	0.3												10	0.980488	0.979656	0.986486
0.05	0.05	0.05		0.2	0.2	0.2		0.3	0.3	0.3												10.1	0.980488	0.979656	0.986486
0.05	0.05	0.05		0.2	0.2	0.2		0.3	0.3	0.3												10.2	0.980488	0.979656	0.987988
0.05	0.05	0.05		0.2	0.2	0.2		0.3	0.3	0.3												10.3	0.980488	0.979656	0.989489
0.05	0.05	0.05		0.2	0.2	0.2		0.3	0.3	0.3												10.4	0.980488	0.979656	0.989489
0.05	0.05	0.05		0.2	0.2	0.2		0.3	0.3	0.3												10.5	0.982114	0.979656	0.989489
0.05	0.05	0.05		0.2	0.2	0.2		0.3	0.3	0.3												10.6	0.982114	0.979656	0.989489
0.05	0.05	0.05		0.2	0.2	0.2		0.3	0.3	0.3												10.7	0.98374	0.981221	0.989489
0.05	0.05	0.05		0.2	0.2	0.2		0.3	0.3	0.3												10.8	0.98374	0.981221	0.990991
0.05	0.05	0.05		0.2	0.2	0.2		0.3	0.3	0.3												10.9	0.98374	0.982786	0.990991
0.05	0.05	0.05		0.2	0.2	0.2		0.3	0.3	0.3												11	0.98374	0.982786	0.990991
0.05	0.05	0.05		0.2	0.2	0.2		0.3	0.3	0.3												11.1	0.985366	0.982786	0.990991
0.05	0.05	0.05		0.2	0.2	0.2		0.3	0.3	0.3												11.2	0.985366	0.982786	0.990991
0.05	0.05	0.05		0.2	0.2	0.2		0.3	0.3	0.3												11.3	0.986992	0.982786	0.990991
0.05	0.05	0.05		0.2	0.2	0.2		0.3	0.3	0.3												11.4	0.986992	0.984351	0.990991
0.05	0.05	0.05		0.2	0.2	0.2		0.3	0.3	0.3												11.5	0.986992	0.984351	0.990991
0.05	0.05	0.05		0.2	0.2	0.2		0.3	0.3	0.3												11.6	0.986992	0.984351	0.990991
0.05	0.05	0.05		0.2	0.2	0.2		0.3	0.3	0.3												11.7	0.986992	0.985915	0.992492
0.05	0.05	0.05		0.2	0.2	0.2		0.3	0.3	0.3												11.8	0.986992	0.985915	0.992492
0.05	0.05	0.05		0.2	0.2	0.2		0.3	0.3	0.3												11.9	0.986992	0.985915	0.992492
0.05	0.05	0.05		0.2	0.2	0.2		0.3	0.3	0.3												12	0.986992	0.985915	0.992492
0.05	0.05	0.05		0.2	0.2	0.2		0.3	0.3	0.3												12.1	0.986992	0.985915	0.992492
0.05	0.05	0.05		0.2	0.2	0.2		0.3	0.3	0.3												12.2	0.986992	0.985915	0.992492
0.05	0.05	0.05		0.2	0.2	0.2		0.3	0.3	0.3												12.3	0.986992	0.985915	0.992492
0.05	0.05	0.05		0.2	0.2	0.2		0.3	0.4	0.3												12.4	0.986992	0.985915	0.992492
0.05	0.05	0.05		0.2	0.2	0.2		0.3	0.4	0.3												12.5	0.986992	0.98748	0.992492
0.05	0.05	0.05		0.2	0.2	0.2		0.3	0.4	0.3												12.6	0.986992	0.98748	0.992492
0.05	0.05	0.05		0.2	0.2	0.2		0.3	0.4	0.3												12.7	0.988618	0.98748	0.995495
0.05	0.05	0.05		0.2	0.2	0.2		0.3	0.4	0.3												12.8	0.988618	0.98748	0.995495
0.05	0.05	0.05		0.2	0.2	0.2		0.3	0.4	0.3												12.9	0.988618	0.989045	0.995495
0.05	0.05	0.05		0.2	0.2	0.2		0.3	0.4	0.3												13	0.988618	0.989045	0.995495
0.05	0.05	0.05		0.2	0.2	0.2		0.3	0.4	0.3												13.1	0.988618	0.989045	0.995495
0.05	0.05	0.05		0.3	0.2	0.2		0.3	0.4	0.3												13.2	0.988618	0.989045	0.995495
0.05	0.05	0.05		0.3	0.2	0.2		0.3	0.4	0.3												13.3	0.990244	0.989045	0.995495
0.05	0.05	0.05		0.3	0.2	0.2		0.4	0.4	0.3												13.4	0.990244	0.989045	0.995495
0.05	0.05	0.05		0.3	0.2	0.2		0.4	0.4	0.3												13.5	0.990244	0.989045	0.995495
0.05	0.05	0.05		0.3	0.2	0.2		0.4	0.4	0.3												13.6	0.990244	0.989045	0.995495
0.05	0.05	0.05		0.3	0.2	0.2		0.4	0.4	0.3												13.7	0.99187	0.989045	0.995495
0.05	0.05	0.05		0.3	0.2	0.2		0.4	0.4	0.3												13.8	0.993496	0.989045	0.995495
0.05	0.05	0.05		0.3	0.2	0.2		0.4	0.4	0.3												13.9	0.993496	0.989045	0.995495
0.05	0.05	0.05		0.3	0.2	0.2		0.4	0.4	0.3												14	0.993496	0.989045	0.995495
0.05	0.05	0.05		0.3	0.2	0.2		0.4	0.4	0.3												14.1	0.993496	0.989045	0.995495
0.05	0.05	0.05		0.3	0.2	0.2		0.4	0.4	0.3												14.2	0.993496	0.989045	0.995495
0.05	0.05	0.05		0.3	0.2	0.2		0.4	0.4	0.3												14.3	0.993496	0.989045	0.996997
0.05	0.05	0.05		0.3	0.2	0.2		0.4	0.4	0.3												14.4	0.993496	0.989045	0.996997
0.05	0.05	0.05		0.3	0.2	0.2		0.4	0.4	0.3												14.5	0.993496	0.989045	0.996997
0.05	0.05	0.05		0.3	0.2	0.2		0.4	0.4	0.3												14.6	0.993496	0.989045	0.996997
0.05	0.05	0.05		0.3	0.2	0.2		0.4	0.4	0.4												14.7	0.993496	0.989045	0.996997
0.05	0.05	0.05		0.3	0.2	0.2		0.4	0.4	0.4												14.8	0.996748	0.989045	0.996997
0.05	0.05	0.05		0.3	0.2	0.2		0.4	0.4	0.4												14.9	0.996748	0.989045	0.996997
0.05	0.05	0.05		0.3	0.2	0.2		0.4	0.4	0.4												15	0.996748	0.989045	0.996997
0.05	0.05	0.05		0.3	0.2	0.2		0.4	0.4	0.4												15.1	0.998374	0.989045	0.996997
0.05	0.05	0.05		0.3	0.2	0.2		0.4	0.4	0.4												15.2	0.998374	0.989045	0.996997
0.05	0.05	0.05		0.3	0.2	0.2		0.4	0.4	0.4												15.3	1	0.99061	0.996997
0.05	0.05	0.05		0.3	0.2	0.2		0.4	0.4	0.4												15.4		0.99061	0.998498
0.05	0.05	0.05		0.3	0.2	0.2		0.4	0.4	0.4												15.5		0.99061	0.998498
0.05	0.05	0.05		0.3	0.2	0.2		0.4	0.4	0.4												15.6		0.992175	0.998498
0.05	0.05	0.05		0.3	0.2	0.2		0.4	0.4	0.4												15.7		0.992175	0.998498
0.05	0.05	0.05		0.3	0.2	0.2		0.4	0.4	0.4												15.8		0.992175	0.998498
0.05	0.05	0.05		0.3	0.2	0.2		0.4	0.4	0.4												15.9		0.992175	0.998498
0.05	0.05	0.05		0.3	0.2	0.2		0.4	0.4	0.4												16		0.992175	0.998498
0.05	0.05	0.05		0.3	0.2	0.2		0.4	0.4	0.4												16.1		0.992175	0.998498
0.05	0.05	0.05		0.3	0.2	0.2		0.4	0.4	0.4												16.2		0.992175	0.998498
0.05	0.05	0.05		0.3	0.2	0.2		0.4	0.4	0.4												16.3		0.992175	0.998498
0.05	0.05	0.05		0.3	0.2	0.2		0.4	0.4	0.4												16.4		0.992175	1
0.05	0.05	0.05		0.3	0.2	0.2		0.4	0.4	0.4												16.5		0.992175
0.05	0.05	0.05		0.3	0.2	0.2		0.4	0.4	0.4												16.6		0.992175
0.05	0.05	0.05		0.3	0.2	0.2		0.4	0.4	0.4												16.7		0.99374
0.05	0.05	0.05		0.3	0.2	0.2		0.4	0.4	0.4												16.8		0.99374
0.05	0.05	0.05		0.3	0.2	0.2		0.4	0.4	0.4												16.9		0.99374
0.05	0.05	0.05		0.3	0.2	0.2		0.4	0.4	0.4												17		0.99374
0.05	0.05	0.05		0.3	0.2	0.2		0.4	0.4	0.4												17.1		0.99374
0.05	0.05	0.05		0.3	0.2	0.2		0.4	0.4	0.4												17.2		0.99374
0.05	0.05	0.05		0.3	0.2	0.2		0.4	0.4	0.4												17.3		0.99374
0.05	0.05	0.05		0.3	0.2	0.2		0.4	0.4	0.4												17.4		0.99374
0.05	0.05	0.05		0.3	0.2	0.2		0.4	0.4	0.4												17.5		0.99374
0.05	0.05	0.05		0.3	0.2	0.2		0.4	0.4	0.4												17.6		0.995305
0.05	0.05	0.05		0.3	0.2	0.2		0.4	0.4	0.4												17.7		0.995305
0.05	0.05	0.05		0.3	0.2	0.2		0.4	0.4	0.4												17.8		0.995305
0.05	0.05	0.05		0.3	0.2	0.2		0.4	0.4	0.4												17.9		0.995305
0.05	0.05	0.05		0.3	0.2	0.2		0.4	0.4	0.4												18		0.995305
0.05	0.05	0.05		0.3	0.2	0.2		0.4	0.4	0.4												18.1		0.99687
0.05	0.05	0.05		0.3	0.2	0.2		0.4	0.4	0.4												18.2		0.99687
0.05	0.05	0.05		0.3	0.2	0.2		0.4	0.5	0.4												18.3		0.99687
0.05	0.05	0.05		0.3	0.2	0.2		0.5	0.5	0.4												18.4		0.99687
0.05	0.05	0.05		0.3	0.2	0.2		0.5	0.5	0.4												18.5		0.99687
0.05	0.05	0.05		0.3	0.2	0.2		0.5	0.5	0.4												18.6		0.99687
0.05	0.05	0.05		0.3	0.2	0.2		0.5	0.5	0.4												18.7		0.99687
0.05	0.05	0.05		0.3	0.2	0.2		0.5	0.5	0.4												18.8		0.99687
0.05	0.05	0.05		0.3	0.2	0.2		0.5	0.5	0.4												18.9		0.99687
0.05	0.05	0.05		0.3	0.2	0.2		0.5	0.5	0.4												19		0.99687
0.05	0.05	0.05		0.3	0.2	0.2		0.5	0.5	0.4												19.1		0.99687
0.05	0.05	0.05		0.3	0.2	0.2		0.5	0.5	0.4												19.2		0.99687
0.05	0.05	0.05		0.3	0.2	0.2		0.5	0.5	0.4												19.3		0.99687
0.05	0.05	0.05		0.3	0.2	0.2		0.5	0.5	0.4												19.4		0.99687
0.05	0.05	0.05		0.3	0.2	0.2		0.5	0.5	0.4												19.5		0.99687
0.05	0.05	0.05		0.3	0.2	0.2		0.5	0.5	0.4												19.6		0.99687
0.05	0.05	0.05		0.3	0.2	0.2		0.5	0.5	0.5												19.7		0.99687
0.05	0.05	0.05		0.3	0.2	0.2		0.5	0.5	0.5												19.8		0.99687
0.05	0.05	0.05		0.3	0.2	0.2		0.5	0.5	0.5												19.9		0.99687
0.05	0.05	0.05		0.3	0.2	0.2		0.5	0.5	0.5												20		0.99687
0.05	0.05	0.05		0.4	0.2	0.2		0.5	0.5	0.5												20.1		0.99687
0.05	0.05	0.05		0.4	0.2	0.2		0.5	0.5	0.5												20.2		0.99687
0.05	0.05	0.05		0.4	0.2	0.2		0.5	0.5	0.5												20.3		0.99687
0.05	0.05	0.05		0.4	0.2	0.2		0.5	0.5	0.5												20.4		0.99687
0.05	0.05	0.05		0.4	0.2	0.2		0.5	0.5	0.5												20.5		0.99687
0.05	0.05	0.05		0.4	0.2	0.2		0.5	0.5	0.5												20.6		0.99687
0.05	0.05	0.05		0.4	0.2	0.2		0.5	0.5	0.5												20.7		0.99687
0.05	0.05	0.05		0.4	0.2	0.2		0.5	0.5	0.5												20.8		0.99687
0.05	0.05	0.05		0.4	0.2	0.2		0.5	0.5	0.5												20.9		0.99687
0.05	0.05	0.05		0.4	0.2	0.2		0.5	0.5	0.5												21		0.99687
0.05	0.05	0.05		0.4	0.2	0.2		0.5	0.5	0.5												21.1		0.99687
0.05	0.05	0.05		0.4	0.2	0.2		0.5	0.5	0.5												21.2		0.99687
0.05	0.05	0.05		0.4	0.2	0.2		0.5	0.5	0.5												21.3		0.99687
0.05	0.05	0.05		0.4	0.2	0.2		0.5	0.5	0.5												21.4		0.99687
0.05	0.05	0.05		0.4	0.2	0.2		0.5	0.5	0.5												21.5		0.99687
0.05	0.05	0.05		0.4	0.2	0.2		0.5	0.5	0.5												21.6		0.99687
0.05	0.05	0.05		0.4	0.2	0.2		0.5	0.5	0.5												21.7		0.99687
0.05	0.05	0.05		0.4	0.2	0.2		0.5	0.5	0.5												21.8		0.99687
0.05	0.05	0.05		0.4	0.2	0.2		0.5	0.5	0.5												21.9		0.99687
0.05	0.05	0.05		0.4	0.2	0.2		0.5	0.5	0.5												22		0.99687
0.05	0.05	0.05		0.4	0.2	0.2		0.6	0.5	0.5												22.1		0.99687
0.05	0.05	0.05		0.4	0.2	0.2		0.6	0.5	0.5												22.2		0.99687
0.05	0.05	0.05		0.4	0.2	0.2		0.6	0.5	0.5												22.3		0.99687
0.05	0.05	0.05		0.4	0.2	0.2		0.6	0.6	0.5												22.4		0.99687
0.05	0.05	0.05		0.4	0.2	0.2		0.6	0.6	0.5												22.5		0.99687
0.05	0.05	0.05		0.4	0.2	0.2		0.6	0.6	0.5												22.6		0.998435
0.05	0.05	0.05		0.4	0.2	0.2		0.6	0.6	0.5												22.7		0.998435
0.05	0.05	0.05		0.4	0.2	0.2		0.6	0.6	0.5												22.8		0.998435
0.05	0.05	0.05		0.4	0.2	0.2		0.6	0.6	0.5												22.9		0.998435
0.05	0.05	0.05		0.4	0.2	0.2		0.6	0.6	0.5												23		0.998435
0.05	0.05	0.05		0.4	0.2	0.2		0.6	0.6	0.5												23.1		0.998435
0.05	0.05	0.05		0.4	0.2	0.2		0.6	0.6	0.5												23.2		0.998435
0.05	0.05	0.05		0.4	0.2	0.2		0.6	0.6	0.5												23.3		0.998435
0.05	0.05	0.05		0.4	0.2	0.2		0.6	0.6	0.5												23.4		0.998435
0.05	0.05	0.05		0.4	0.2	0.2		0.6	0.6	0.5												23.5		0.998435
0.05	0.05	0.05		0.4	0.2	0.2		0.6	0.6	0.5												23.6		0.998435
0.05	0.05	0.05		0.4	0.2	0.2		0.6	0.6	0.5												23.7		0.998435
0.05	0.05	0.05		0.4	0.2	0.2		0.6	0.6	0.5												23.8		0.998435
0.05	0.05	0.05		0.4	0.2	0.2		0.6	0.6	0.6												23.9		0.998435
0.05	0.05	0.05		0.4	0.2	0.2		0.6	0.6	0.6												24		0.998435
0.05	0.05	0.05		0.4	0.2	0.2		0.6	0.6	0.6												24.1		0.998435
0.05	0.05	0.05		0.4	0.2	0.2		0.6	0.6	0.6												24.2		0.998435
0.05	0.05	0.05		0.4	0.2	0.2		0.6	0.6	0.6												24.3		0.998435
0.05	0.05	0.05		0.4	0.2	0.2		0.6	0.6	0.6												24.4		0.998435
0.05	0.05	0.05		0.4	0.2	0.2		0.7	0.6	0.6												24.5		0.998435
0.05	0.05	0.05		0.4	0.2	0.2		0.7	0.6	0.6												24.6		0.998435
0.05	0.05	0.05		0.4	0.2	0.2		0.7	0.6	0.6												24.7		0.998435
0.05	0.05	0.05		0.4	0.2	0.2		0.7	0.6	0.6												24.8		0.998435
0.05	0.05	0.05		0.4	0.2	0.2		0.7	0.6	0.6												24.9		0.998435
0.05	0.05	0.05		0.4	0.2	0.2		0.7	0.6	0.6												25		0.998435
0.05	0.05	0.05		0.4	0.2	0.2		0.7	0.6	0.6												25.1		0.998435
0.05	0.05	0.05		0.4	0.2	0.2		0.7	0.6	0.6												25.2		0.998435
0.05	0.05	0.05		0.4	0.2	0.2		0.7	0.6	0.6												25.3		0.998435
0.05	0.05	0.05		0.4	0.2	0.2		0.7	0.6	0.6												25.4		0.998435
0.05	0.05	0.05		0.4	0.2	0.2		0.7	0.7	0.6												25.5		0.998435
0.05	0.05	0.05		0.4	0.2	0.2		0.7	0.7	0.6												25.6		0.998435
0.05	0.05	0.05		0.4	0.2	0.2		0.7	0.7	0.6												25.7		0.998435
0.05	0.05	0.05		0.4	0.2	0.2		0.7	0.7	0.6												25.8		0.998435
0.05	0.05	0.05		0.4	0.2	0.2		0.7	0.7	0.6												25.9		0.998435
0.05	0.05	0.05		0.4	0.2	0.2		0.7	0.7	0.6												26		0.998435
0.05	0.05	0.05		0.4	0.2	0.2		0.7	0.7	0.6												26.1		0.998435
0.05	0.05	0.05		0.4	0.2	0.2		0.7	0.7	0.6												26.2		0.998435
0.05	0.05	0.05		0.4	0.2	0.2		0.7	0.7	0.6												26.3		0.998435
0.05	0.05	0.05		0.4	0.2	0.2		0.7	0.7	0.6												26.4		0.998435
0.05	0.05	0.05		0.4	0.2	0.2		0.7	0.7	0.6												26.5		0.998435
0.05	0.05	0.05		0.4	0.2	0.2		0.7	0.7	0.6												26.6		0.998435
0.05	0.05	0.05		0.4	0.2	0.2		0.7	0.7	0.6												26.7		0.998435
0.05	0.05	0.05		0.4	0.2	0.2		0.7	0.7	0.6												26.8		0.998435
0.05	0.05	0.05		0.4	0.2	0.2		0.7	0.7	0.6												26.9		0.998435
0.05	0.05	0.05		0.4	0.2	0.2		0.7	0.7	0.6												27		0.998435
0.05	0.05	0.05		0.4	0.2	0.2		0.7	0.7	0.6												27.1		0.998435
0.05	0.05	0.05		0.4	0.2	0.2		0.7	0.7	0.6												27.2		1
0.05	0.05	0.05		0.5	0.2	0.2		0.7	0.7	0.7
0.05	0.05	0.05		0.5	0.2	0.2		0.7	0.7	0.7
0.05	0.05	0.05		0.5	0.2	0.2		0.7	0.7	0.7
0.05	0.05	0.05		0.5	0.2	0.2		0.7	0.7	0.7
0.05	0.05	0.05		0.5	0.2	0.2		0.7	0.7	0.7
0.05	0.05	0.05		0.5	0.2	0.2		0.8	0.7	0.7
0.05	0.05	0.05		0.5	0.2	0.2		0.8	0.7	0.7
0.05	0.05	0.05		0.5	0.2	0.2		0.8	0.7	0.7
0.05	0.05	0.05		0.5	0.2	0.2		0.8	0.8	0.7
0.05	0.05	0.05		0.5	0.2	0.2		0.8	0.8	0.7
0.05	0.05	0.05		0.5	0.2	0.2		0.8	0.8	0.7
0.05	0.05	0.05		0.5	0.2	0.2		0.8	0.8	0.7
0.05	0.05	0.05		0.5	0.2	0.2		0.8	0.8	0.7
0.05	0.05	0.05		0.5	0.2	0.2		0.8	0.8	0.7
0.05	0.05	0.05		0.5	0.2	0.2		0.8	0.8	0.7
0.05	0.05	0.05		0.5	0.2	0.2		0.8	0.8	0.7
0.05	0.05	0.05		0.5	0.2	0.2		0.8	0.8	0.7
0.05	0.05	0.05		0.5	0.2	0.2		0.8	0.8	0.7
0.05	0.05	0.05		0.5	0.2	0.2		0.8	0.8	0.7
0.05	0.05	0.05		0.5	0.2	0.2		0.8	0.8	0.7
0.05	0.05	0.05		0.5	0.2	0.2		0.8	0.8	0.7
0.05	0.05	0.05		0.5	0.2	0.2		0.8	0.8	0.7
0.05	0.05	0.05		0.5	0.2	0.2		0.8	0.8	0.7
0.05	0.05	0.05		0.5	0.2	0.2		0.8	0.8	0.7
0.05	0.05	0.05		0.5	0.2	0.2		0.8	0.8	0.7
0.05	0.05	0.05		0.5	0.2	0.2		0.8	0.8	0.7
0.05	0.05	0.05		0.5	0.2	0.2		0.8	0.8	0.7
0.05	0.05	0.05		0.5	0.2	0.2		0.8	0.8	0.7
0.05	0.05	0.05		0.5	0.2	0.2		0.8	0.8	0.7
0.05	0.05	0.05		0.5	0.2	0.2		0.8	0.8	0.7
0.05	0.05	0.05		0.5	0.2	0.2		0.9	0.8	0.7
0.05	0.05	0.05		0.5	0.2	0.2		0.9	0.8	0.7
0.05	0.05	0.05		0.5	0.2	0.2		0.9	0.8	0.8
0.05	0.05	0.05		0.5	0.2	0.2		0.9	0.8	0.8
0.05	0.05	0.05		0.5	0.2	0.2		0.9	0.8	0.8
0.05	0.05	0.05		0.5	0.2	0.2		0.9	0.8	0.8
0.05	0.05	0.05		0.5	0.2	0.2		0.9	0.8	0.8
0.05	0.05	0.05		0.5	0.2	0.2		0.9	0.8	0.8
0.05	0.05	0.05		0.5	0.2	0.2		0.9	0.8	0.8
0.05	0.05	0.05		0.5	0.2	0.2		0.9	0.9	0.8
0.05	0.05	0.05		0.5	0.2	0.2		0.9	0.9	0.8
0.05	0.05	0.05		0.5	0.2	0.2		0.9	0.9	0.8
0.05	0.05	0.05		0.5	0.2	0.2		0.9	0.9	0.8
0.05	0.05	0.05		0.5	0.2	0.2		0.9	0.9	0.8
0.05	0.05	0.05		0.5	0.2	0.2		0.9	0.9	0.8
0.05	0.05	0.05		0.5	0.2	0.2		0.9	0.9	0.8
0.05	0.05	0.05		0.5	0.2	0.3		0.9	0.9	0.8
0.05	0.05	0.05		0.5	0.2	0.3		0.9	0.9	0.8
0.05	0.05	0.05		0.5	0.2	0.3		0.9	0.9	0.8
0.05	0.05	0.05		0.5	0.2	0.3		0.9	0.9	0.9
0.05	0.05	0.05		0.5	0.2	0.3		0.9	0.9	0.9
0.05	0.05	0.05		0.5	0.2	0.3		0.9	0.9	0.9
0.05	0.05	0.05		0.5	0.2	0.3		0.9	0.9	0.9
0.05	0.05	0.05		0.5	0.2	0.3		0.9	0.9	0.9
0.05	0.05	0.05		0.5	0.2	0.3		0.9	0.9	0.9
0.05	0.05	0.05		0.6	0.2	0.3		1	0.9	0.9
0.05	0.05	0.05		0.6	0.2	0.3		1	0.9	0.9
0.05	0.05	0.05		0.6	0.2	0.3		1	0.9	0.9
0.05	0.05	0.05		0.6	0.2	0.3		1	1	0.9
0.05	0.05	0.05		0.6	0.2	0.3		1	1	0.9
0.05	0.05	0.05		0.6	0.2	0.3		1	1	0.9
0.05	0.05	0.05		0.6	0.2	0.3		1	1	0.9
0.05	0.05	0.05		0.6	0.2	0.3		1	1	0.9
0.05	0.05	0.05		0.6	0.2	0.3		1	1	0.9
0.05	0.05	0.05		0.6	0.2	0.3		1	1	0.9
0.05	0.05	0.05		0.6	0.2	0.3		1	1	0.9
0.05	0.05	0.05		0.6	0.2	0.3		1	1	0.9
0.05	0.05	0.05		0.6	0.2	0.3		1	1	0.9
0.05	0.05	0.05		0.6	0.2	0.3		1	1	0.9
0.05	0.05	0.05		0.6	0.2	0.3		1	1	0.9
0.05	0.05	0.05		0.6	0.2	0.3		1.1	1	0.9
0.05	0.05	0.05		0.6	0.2	0.3		1.1	1	0.9
0.05	0.05	0.05		0.6	0.2	0.3		1.1	1	0.9
0.05	0.05	0.05		0.6	0.2	0.3		1.1	1	0.9
0.05	0.05	0.05		0.6	0.2	0.3		1.1	1	0.9
0.05	0.05	0.05		0.6	0.2	0.3		1.1	1	1
0.05	0.05	0.05		0.6	0.2	0.3		1.1	1	1
0.05	0.05	0.05		0.6	0.2	0.3		1.1	1	1
0.05	0.05	0.05		0.6	0.2	0.3		1.1	1	1
0.05	0.05	0.05		0.6	0.2	0.3		1.1	1.1	1
0.05	0.05	0.05		0.6	0.2	0.3		1.1	1.1	1
0.05	0.05	0.05		0.6	0.2	0.3		1.1	1.1	1
0.05	0.05	0.05		0.6	0.2	0.3		1.1	1.1	1
0.05	0.05	0.05		0.6	0.2	0.3		1.1	1.1	1
0.05	0.05	0.05		0.6	0.2	0.3		1.1	1.1	1
0.05	0.05	0.05		0.6	0.2	0.3		1.1	1.1	1
0.05	0.05	0.05		0.6	0.2	0.3		1.2	1.1	1
0.05	0.05	0.05		0.6	0.2	0.3		1.2	1.1	1
0.05	0.05	0.05		0.6	0.2	0.3		1.2	1.1	1
0.05	0.05	0.05		0.6	0.2	0.3		1.2	1.1	1
0.05	0.05	0.05		0.6	0.2	0.3		1.2	1.1	1
0.05	0.05	0.05		0.6	0.2	0.3		1.2	1.1	1
0.05	0.05	0.05		0.6	0.2	0.3		1.2	1.1	1
0.05	0.05	0.05		0.6	0.2	0.3		1.2	1.1	1
0.05	0.05	0.05		0.6	0.2	0.3		1.2	1.2	1
0.05	0.05	0.05		0.7	0.2	0.3		1.2	1.2	1
0.05	0.05	0.05		0.7	0.2	0.3		1.2	1.2	1
0.05	0.05	0.05		0.7	0.2	0.3		1.2	1.2	1
0.05	0.05	0.05		0.7	0.2	0.3		1.2	1.2	1
0.05	0.05	0.05		0.7	0.2	0.3		1.2	1.2	1
0.05	0.05	0.05		0.7	0.2	0.3		1.2	1.2	1.1
0.05	0.05	0.05		0.7	0.2	0.3		1.2	1.2	1.1
0.05	0.05	0.05		0.7	0.2	0.3		1.3	1.2	1.1
0.05	0.05	0.05		0.7	0.2	0.3		1.3	1.2	1.1
0.05	0.05	0.05		0.7	0.2	0.3		1.3	1.2	1.1
0.05	0.05	0.05		0.7	0.2	0.3		1.3	1.2	1.1
0.05	0.05	0.05		0.7	0.2	0.3		1.3	1.2	1.1
0.05	0.05	0.05		0.7	0.2	0.3		1.3	1.2	1.1
0.05	0.05	0.05		0.7	0.2	0.3		1.3	1.2	1.1
0.05	0.05	0.05		0.7	0.2	0.3		1.3	1.2	1.1
0.05	0.05	0.05		0.7	0.2	0.3		1.3	1.2	1.1
0.05	0.05	0.05		0.7	0.2	0.3		1.3	1.3	1.1
0.05	0.05	0.05		0.7	0.2	0.3		1.3	1.3	1.1
0.05	0.05	0.05		0.7	0.2	0.3		1.3	1.3	1.2
0.05	0.05	0.05		0.7	0.2	0.3		1.3	1.3	1.2
0.05	0.05	0.05		0.7	0.2	0.3		1.3	1.3	1.2
0.05	0.05	0.05		0.7	0.2	0.3		1.3	1.3	1.2
0.05	0.05	0.05		0.7	0.2	0.3		1.3	1.3	1.2
0.05	0.05	0.05		0.7	0.2	0.3		1.4	1.3	1.2
0.05	0.05	0.05		0.7	0.2	0.3		1.4	1.3	1.2
0.05	0.05	0.05		0.7	0.2	0.3		1.4	1.3	1.2
0.05	0.05	0.05		0.7	0.2	0.3		1.4	1.3	1.2
0.05	0.05	0.05		0.7	0.2	0.3		1.4	1.3	1.2
0.05	0.05	0.05		0.7	0.2	0.3		1.4	1.3	1.2
0.05	0.05	0.05		0.7	0.2	0.3		1.4	1.3	1.2
0.05	0.05	0.05		0.7	0.2	0.3		1.5	1.4	1.2
0.05	0.05	0.05		0.7	0.2	0.3		1.5	1.4	1.3
0.05	0.05	0.05		0.7	0.2	0.3		1.5	1.4	1.3
0.05	0.05	0.05		0.7	0.2	0.3		1.5	1.4	1.3
0.05	0.05	0.05		0.7	0.2	0.3		1.5	1.4	1.3
0.05	0.05	0.05		0.7	0.2	0.3		1.6	1.4	1.3
0.05	0.05	0.05		0.7	0.2	0.3		1.6	1.4	1.3
0.05	0.05	0.05		0.7	0.2	0.3		1.6	1.4	1.3
0.05	0.05	0.05		0.7	0.2	0.3		1.6	1.5	1.3
0.05	0.05	0.05		0.8	0.2	0.3		1.6	1.5	1.3
0.05	0.05	0.05		0.8	0.2	0.3		1.6	1.5	1.3
0.05	0.05	0.05		0.8	0.2	0.3		1.6	1.5	1.3
0.05	0.05	0.05		0.8	0.2	0.3		1.6	1.5	1.3
0.05	0.05	0.05		0.8	0.3	0.3		1.6	1.5	1.3
0.05	0.05	0.05		0.8	0.3	0.3		1.7	1.5	1.4
0.05	0.05	0.05		0.8	0.3	0.3		1.7	1.5	1.4
0.05	0.05	0.05		0.8	0.3	0.3		1.7	1.5	1.4
0.05	0.05	0.05		0.8	0.3	0.3		1.7	1.5	1.4
0.05	0.05	0.05		0.8	0.3	0.3		1.7	1.5	1.4
0.1	0.05	0.05		0.8	0.3	0.3		1.7	1.5	1.4
0.1	0.05	0.05		0.8	0.3	0.3		1.7	1.5	1.4
0.1	0.05	0.05		0.8	0.3	0.3		1.7	1.5	1.4
0.1	0.05	0.05		0.8	0.3	0.3		1.7	1.6	1.4
0.1	0.05	0.05		0.8	0.3	0.3		1.7	1.6	1.4
0.1	0.05	0.05		0.8	0.3	0.3		1.7	1.6	1.4
0.1	0.05	0.05		0.8	0.3	0.3		1.7	1.6	1.4
0.1	0.05	0.05		0.8	0.3	0.3		1.7	1.6	1.4
0.1	0.05	0.05		0.8	0.3	0.3		1.8	1.6	1.4
0.1	0.05	0.05		0.8	0.3	0.3		1.8	1.6	1.4
0.1	0.05	0.05		0.8	0.3	0.3		1.8	1.6	1.5
0.1	0.05	0.05		0.8	0.3	0.3		1.8	1.6	1.5
0.1	0.05	0.05		0.8	0.3	0.3		1.8	1.6	1.5
0.1	0.05	0.05		0.9	0.3	0.3		1.8	1.6	1.5
0.1	0.05	0.05		0.9	0.3	0.3		1.8	1.6	1.5
0.1	0.05	0.05		0.9	0.3	0.3		1.8	1.7	1.5
0.1	0.05	0.05		0.9	0.3	0.3		1.8	1.7	1.5
0.1	0.05	0.05		0.9	0.3	0.3		1.8	1.7	1.5
0.1	0.05	0.05		0.9	0.3	0.3		1.9	1.7	1.6
0.1	0.05	0.05		0.9	0.3	0.3		1.9	1.7	1.6
0.1	0.05	0.05		0.9	0.3	0.3		1.9	1.7	1.6
0.1	0.05	0.05		0.9	0.3	0.3		1.9	1.7	1.6
0.1	0.05	0.05		0.9	0.3	0.3		1.9	1.7	1.6
0.1	0.05	0.05		0.9	0.3	0.3		1.9	1.7	1.6
0.1	0.05	0.05		0.9	0.3	0.3		1.9	1.7	1.6
0.1	0.05	0.05		0.9	0.3	0.3		1.9	1.7	1.6
0.1	0.05	0.05		0.9	0.3	0.3		1.9	1.7	1.6
0.1	0.05	0.05		0.9	0.3	0.3		1.9	1.7	1.6
0.1	0.05	0.05		0.9	0.3	0.3		1.9	1.7	1.6
0.1	0.05	0.05		0.9	0.3	0.3		2	1.8	1.6
0.1	0.05	0.05		0.9	0.3	0.3		2	1.8	1.6
0.1	0.05	0.05		0.9	0.3	0.3		2	1.8	1.7
0.1	0.05	0.05		0.9	0.3	0.3		2	1.8	1.7
0.1	0.05	0.05		0.9	0.3	0.3		2	1.8	1.7
0.1	0.05	0.05		0.9	0.3	0.3		2	1.8	1.7
0.1	0.05	0.05		0.9	0.3	0.3		2.2	1.8	1.7
0.1	0.05	0.05		0.9	0.3	0.3		2.2	1.9	1.7
0.1	0.05	0.05		1	0.3	0.3		2.2	1.9	1.7
0.1	0.05	0.05		1	0.3	0.3		2.2	1.9	1.7
0.1	0.05	0.05		1	0.3	0.3		2.2	1.9	1.7
0.1	0.05	0.05		1	0.3	0.3		2.2	1.9	1.7
0.1	0.05	0.05		1	0.3	0.3		2.2	2	1.8
0.1	0.05	0.05		1	0.3	0.3		2.2	2	1.8
0.1	0.05	0.05		1	0.3	0.3		2.3	2	1.8
0.1	0.05	0.05		1	0.3	0.3		2.3	2	1.8
0.1	0.05	0.05		1	0.3	0.3		2.3	2	1.9
0.1	0.05	0.05		1	0.3	0.3		2.3	2	1.9
0.1	0.05	0.05		1	0.3	0.3		2.3	2	1.9
0.1	0.05	0.05		1	0.3	0.3		2.3	2	1.9
0.1	0.05	0.05		1	0.3	0.3		2.3	2.1	1.9
0.1	0.05	0.05		1	0.3	0.3		2.3	2.1	1.9
0.1	0.05	0.05		1	0.3	0.3		2.3	2.1	1.9
0.1	0.05	0.05		1.1	0.3	0.3		2.4	2.1	1.9
0.1	0.05	0.05		1.1	0.3	0.3		2.4	2.1	1.9
0.1	0.05	0.05		1.1	0.3	0.3		2.4	2.1	1.9
0.1	0.05	0.05		1.1	0.3	0.3		2.4	2.1	1.9
0.1	0.05	0.05		1.1	0.3	0.3		2.4	2.1	1.9
0.1	0.05	0.05		1.1	0.3	0.3		2.4	2.1	1.9
0.1	0.05	0.05		1.1	0.3	0.3		2.4	2.1	1.9
0.1	0.05	0.05		1.1	0.3	0.3		2.4	2.1	2
0.1	0.05	0.05		1.1	0.3	0.3		2.5	2.1	2
0.1	0.05	0.05		1.2	0.3	0.3		2.5	2.1	2
0.1	0.05	0.05		1.2	0.3	0.3		2.5	2.1	2
0.1	0.05	0.05		1.2	0.3	0.3		2.5	2.1	2
0.1	0.05	0.05		1.2	0.3	0.3		2.5	2.1	2
0.1	0.05	0.05		1.2	0.3	0.3		2.5	2.1	2
0.1	0.05	0.05		1.2	0.3	0.3		2.6	2.2	2
0.1	0.05	0.05		1.2	0.3	0.3		2.6	2.2	2.1
0.1	0.05	0.05		1.2	0.3	0.3		2.6	2.2	2.1
0.1	0.05	0.05		1.2	0.3	0.3		2.6	2.2	2.1
0.1	0.05	0.05		1.2	0.3	0.3		2.6	2.2	2.1
0.1	0.05	0.05		1.2	0.3	0.3		2.6	2.2	2.1
0.1	0.05	0.05		1.2	0.3	0.3		2.7	2.2	2.1
0.1	0.05	0.05		1.3	0.3	0.3		2.8	2.2	2.2
0.1	0.05	0.05		1.3	0.3	0.3		2.8	2.2	2.2
0.1	0.05	0.05		1.3	0.3	0.3		2.8	2.2	2.2
0.1	0.05	0.05		1.3	0.3	0.3		2.8	2.3	2.2
0.1	0.05	0.05		1.3	0.3	0.3		2.8	2.3	2.2
0.1	0.05	0.05		1.3	0.3	0.3		2.8	2.3	2.2
0.1	0.05	0.05		1.3	0.3	0.3		2.8	2.3	2.2
0.1	0.05	0.05		1.3	0.3	0.3		2.8	2.3	2.2
0.1	0.05	0.05		1.3	0.3	0.3		2.9	2.3	2.3
0.1	0.05	0.05		1.4	0.3	0.3		2.9	2.4	2.3
0.1	0.05	0.05		1.4	0.3	0.3		3	2.4	2.3
0.1	0.05	0.05		1.4	0.3	0.3		3	2.4	2.4
0.1	0.05	0.05		1.4	0.3	0.3		3	2.5	2.4
0.1	0.05	0.05		1.4	0.3	0.3		3	2.5	2.4
0.1	0.05	0.05		1.4	0.3	0.3		3	2.5	2.4
0.1	0.05	0.05		1.4	0.3	0.3		3	2.5	2.4
0.1	0.05	0.05		1.4	0.3	0.3		3	2.5	2.5
0.1	0.05	0.05		1.4	0.3	0.3		3	2.5	2.5
0.1	0.05	0.05		1.4	0.3	0.3		3.1	2.5	2.5
0.1	0.05	0.05		1.4	0.3	0.3		3.1	2.6	2.5
0.1	0.05	0.05		1.4	0.3	0.3		3.1	2.6	2.5
0.1	0.05	0.05		1.5	0.3	0.3		3.2	2.6	2.5
0.1	0.05	0.05		1.5	0.3	0.3		3.2	2.6	2.6
0.1	0.05	0.05		1.5	0.3	0.3		3.2	2.7	2.6
0.1	0.05	0.05		1.5	0.3	0.3		3.3	2.7	2.6
0.1	0.05	0.05		1.5	0.3	0.3		3.3	2.7	2.6
0.1	0.05	0.05		1.5	0.3	0.3		3.3	2.7	2.6
0.1	0.05	0.05		1.5	0.3	0.3		3.3	2.7	2.6
0.1	0.05	0.05		1.5	0.3	0.3		3.3	2.7	2.7
0.1	0.05	0.05		1.5	0.3	0.3		3.4	2.8	2.7
0.1	0.05	0.05		1.6	0.3	0.3		3.4	2.8	2.7
0.1	0.05	0.05		1.6	0.3	0.3		3.4	2.8	2.7
0.1	0.05	0.05		1.6	0.3	0.3		3.4	2.8	2.7
0.1	0.05	0.05		1.6	0.3	0.3		3.5	2.9	2.8
0.1	0.05	0.05		1.6	0.3	0.3		3.5	2.9	2.8
0.1	0.05	0.05		1.6	0.3	0.3		3.6	3	2.8
0.1	0.05	0.05		1.6	0.3	0.3		3.6	3	2.8
0.1	0.05	0.05		1.6	0.3	0.3		3.6	3	2.8
0.1	0.05	0.05		1.6	0.3	0.3		3.6	3	2.8
0.1	0.05	0.05		1.6	0.3	0.3		3.7	3	2.8
0.1	0.05	0.05		1.6	0.3	0.3		3.7	3	2.8
0.1	0.05	0.05		1.7	0.3	0.3		3.7	3	2.9
0.1	0.05	0.05		1.7	0.3	0.3		3.8	3.1	2.9
0.1	0.05	0.05		1.7	0.3	0.3		3.9	3.1	2.9
0.1	0.05	0.05		1.7	0.3	0.3		3.9	3.2	2.9
0.1	0.05	0.05		1.7	0.3	0.3		4	3.2	2.9
0.1	0.05	0.05		1.7	0.3	0.3		4	3.2	2.9
0.1	0.05	0.05		1.7	0.3	0.3		4	3.2	3
0.1	0.05	0.05		1.7	0.3	0.3		4.1	3.2	3
0.1	0.05	0.05		1.7	0.3	0.3		4.1	3.2	3
0.1	0.05	0.05		1.8	0.3	0.3		4.1	3.3	3
0.1	0.05	0.05		1.8	0.3	0.3		4.2	3.3	3.1
0.1	0.05	0.05		1.9	0.3	0.3		4.2	3.3	3.1
0.1	0.05	0.05		1.9	0.3	0.3		4.2	3.4	3.1
0.1	0.05	0.05		2	0.3	0.3		4.2	3.5	3.1
0.1	0.05	0.05		2.1	0.3	0.3		4.4	3.5	3.2
0.1	0.05	0.05		2.2	0.3	0.3		4.4	3.5	3.3
0.1	0.05	0.05		2.2	0.3	0.3		4.4	3.5	3.3
0.1	0.05	0.05		2.3	0.3	0.3		4.4	3.6	3.3
0.1	0.05	0.05		2.4	0.3	0.3		4.4	3.6	3.4
0.1	0.05	0.05		2.4	0.3	0.3		4.5	3.6	3.4
0.1	0.05	0.05		2.5	0.3	0.3		4.5	3.8	3.4
0.1	0.05	0.05		2.5	0.3	0.3		4.6	3.8	3.4
0.1	0.05	0.05		2.6	0.3	0.3		4.6	3.9	3.5
0.1	0.05	0.05		2.7	0.3	0.3		4.6	4	3.5
0.1	0.05	0.05			0.3	0.3		4.7	4	3.5
0.1	0.05	0.05			0.3	0.3		4.9	4	3.5
0.1	0.05	0.05			0.3	0.3		4.9	4.1	3.6
0.1	0.05	0.05			0.3	0.3		5	4.2	3.6
0.1	0.05	0.05			0.3	0.3		5	4.2	3.6
0.1	0.05	0.05			0.3	0.3		5.4	4.3	3.6
0.1	0.05	0.05			0.3	0.3		5.4	4.4	3.6
0.1	0.05	0.05			0.3	0.3		5.6	4.5	3.6
0.1	0.05	0.05			0.3	0.3		5.7	4.5	3.7
0.1	0.05	0.05			0.3	0.3		5.7	4.6	3.7
0.1	0.05	0.05			0.3	0.4		5.8	4.6	3.7
0.1	0.05	0.05			0.3	0.4		5.8	4.6	3.8
0.1	0.05	0.05			0.3	0.4		6	4.6	3.8
0.1	0.05	0.05			0.3	0.4		6	4.7	3.8
0.1	0.05	0.05			0.3	0.4		6.1	4.7	3.8
0.1	0.05	0.05			0.3	0.4		6.2	4.8	3.9
0.1	0.05	0.05			0.3	0.4		6.2	4.8	3.9
0.1	0.05	0.05			0.3	0.4		6.4	4.9	4
0.1	0.05	0.05			0.3	0.4		6.4	4.9	4
0.1	0.05	0.05			0.3	0.4		6.5	5	4
0.1	0.05	0.05			0.3	0.4		6.6	5	4
0.1	0.05	0.05			0.3	0.4		6.7	5.1	4.1
0.1	0.05	0.05			0.3	0.4		6.7	5.1	4.1
0.1	0.05	0.05			0.3	0.4		6.7	5.2	4.1
0.1	0.05	0.05			0.3	0.4		6.8	5.2	4.2
0.1	0.05	0.05			0.3	0.4		6.8	5.3	4.2
0.1	0.05	0.1			0.3	0.4		7	5.3	4.2
0.1	0.05	0.1			0.3	0.4		7	5.4	4.3
0.1	0.05	0.1			0.3	0.4		7	5.4	4.4
0.1	0.05	0.1			0.3	0.4		7	5.5	4.6
0.1	0.05	0.1			0.3	0.4		7.1	5.6	4.7
0.1	0.05	0.1			0.3	0.4		7.3	5.6	4.7
0.1	0.05	0.1			0.3	0.4		7.4	5.6	4.7
0.1	0.05	0.1			0.3	0.4		7.5	5.8	4.7
0.1	0.05	0.1			0.3	0.4		7.5	5.8	4.7
0.1	0.05	0.1			0.3	0.4		7.6	5.9	4.7
0.1	0.05	0.1			0.3	0.4		7.7	5.9	4.7
0.1	0.05	0.1			0.3	0.4		8.2	6.1	4.7
0.1	0.05	0.1			0.3	0.4		8.2	6.1	4.8
0.15	0.05	0.1			0.3	0.4		8.3	6.2	4.9
0.15	0.05	0.1			0.3	0.4		8.5	6.3	4.9
0.15	0.05	0.1			0.3	0.4		8.5	6.6	4.9
0.15	0.05	0.1			0.3	0.4		8.6	6.7	4.9
0.15	0.05	0.1			0.3	0.4		8.6	6.7	4.9
0.15	0.05	0.1			0.3	0.4		8.7	6.7	4.9
0.15	0.05	0.1			0.3	0.4		8.9	6.8	5
0.15	0.05	0.1			0.3	0.4		9.2	7	5.1
0.15	0.05	0.1			0.3	0.4		9.3	7	5.1
0.15	0.05	0.1			0.3	0.4		10.5	7.1	5.1
0.15	0.05	0.1			0.3	0.4		10.7	7.1	5.1
0.15	0.05	0.1			0.3	0.4		11.1	7.2	5.2
0.15	0.05	0.1			0.3	0.4		11.3	7.4	5.3
0.15	0.05	0.1			0.3	0.4		12.7	7.4	5.3
0.15	0.05	0.1			0.3	0.4		13.3	7.4	5.3
0.15	0.05	0.1			0.3	0.4		13.7	7.4	5.3
0.15	0.05	0.1			0.3	0.4		13.8	7.5	5.4
0.15	0.05	0.1			0.3	0.4		14.8	7.5	5.5
0.15	0.05	0.1			0.3	0.4		14.8	7.5	5.6
0.15	0.05	0.1			0.3	0.4		15.1	7.5	5.6
0.15	0.05	0.1			0.3	0.4		15.3	7.6	5.8
0.15	0.05	0.1			0.3	0.4			7.7	5.8
0.15	0.05	0.1			0.3	0.4			7.7	6
0.15	0.05	0.1			0.3	0.4			7.7	6.1
0.15	0.05	0.1			0.3	0.4			8	6.1
0.15	0.1	0.1			0.3	0.4			8	6.2
0.15	0.1	0.1			0.3	0.4			8.2	6.4
0.15	0.1	0.1			0.3	0.4			8.4	6.4
0.15	0.1	0.1			0.3	0.4			8.7	6.5
0.15	0.1	0.1			0.3	0.4			9.4	6.6
0.15	0.1	0.1			0.3	0.4			9.6	6.7
0.15	0.1	0.1			0.3	0.4			9.8	6.8
0.15	0.1	0.1			0.3	0.4			10.7	7.1
0.15	0.1	0.1			0.3	0.4			10.9	7.1
0.15	0.1	0.1			0.3	0.4			11.4	7.2
0.15	0.1	0.1			0.3	0.4			11.7	7.2
0.15	0.1	0.1			0.3	0.4			12.5	7.3
0.15	0.1	0.1			0.3	0.4			12.9	7.3
0.15	0.1	0.1			0.3	0.4			15.3	7.3
0.15	0.1	0.1			0.3	0.4			15.6	7.4
0.15	0.1	0.1			0.3	0.4			16.7	7.4
0.15	0.1	0.1			0.3	0.4			17.6	7.5
0.15	0.1	0.1			0.3	0.4			18.1	7.7
0.15	0.1	0.1			0.3	0.4			22.6	7.9
0.15	0.1	0.1			0.3	0.4			27.2	8.1
0.15	0.1	0.1			0.3	0.4				8.3
0.15	0.1	0.1			0.3	0.4				8.4
0.15	0.1	0.1			0.3	0.4				8.5
0.15	0.1	0.1			0.3	0.4				8.5
0.15	0.1	0.1			0.3	0.4				8.7
0.15	0.1	0.1			0.3	0.4				8.9
0.15	0.1	0.1			0.3	0.4				9
0.15	0.1	0.1			0.3	0.4				9.2
0.15	0.1	0.1			0.3	0.4				9.2
0.15	0.1	0.1			0.3	0.4				9.2
0.15	0.1	0.1			0.3	0.4				9.3
0.15	0.1	0.1			0.3	0.4				9.3
0.15	0.1	0.1			0.3	0.4				9.4
0.15	0.1	0.1			0.3	0.4				9.4
0.15	0.1	0.1			0.3	0.4				9.7
0.15	0.1	0.1			0.3	0.4				9.8
0.15	0.1	0.1			0.3	0.4				9.8
0.15	0.1	0.1			0.3	0.4				9.9
0.15	0.1	0.1			0.3	0.4				10.2
0.15	0.1	0.1			0.3	0.4				10.3
0.15	0.1	0.1			0.3	0.4				10.8
0.15	0.1	0.1			0.3	0.4				11.7
0.15	0.1	0.1			0.3	0.4				12.7
0.15	0.1	0.1			0.3	0.4				12.7
0.15	0.1	0.1			0.3	0.4				14.3
0.15	0.1	0.1			0.3	0.4				15.4
0.15	0.1	0.1			0.3	0.4				16.4
0.15	0.1	0.1			0.3	0.4
0.15	0.1	0.1			0.3	0.4
0.15	0.1	0.1			0.3	0.4
0.15	0.1	0.1			0.3	0.4
0.15	0.1	0.1			0.3	0.4
0.15	0.1	0.1			0.3	0.4
0.15	0.1	0.1			0.3	0.4
0.15	0.1	0.1			0.3	0.4
0.15	0.1	0.1			0.3	0.4
0.15	0.1	0.1			0.3	0.4
0.15	0.1	0.1			0.3	0.4
0.15	0.1	0.1			0.3	0.4
0.15	0.1	0.1			0.3	0.4
0.15	0.1	0.1			0.3	0.4
0.15	0.1	0.1			0.3	0.4
0.15	0.1	0.1			0.3	0.4
0.15	0.1	0.1			0.3	0.4
0.15	0.1	0.1			0.3	0.4
0.15	0.1	0.1			0.3	0.4
0.15	0.1	0.1			0.3	0.4
0.15	0.1	0.1			0.3	0.4
0.15	0.1	0.1			0.3	0.4
0.15	0.1	0.1			0.3	0.4
0.15	0.1	0.1			0.3	0.4
0.15	0.1	0.1			0.3	0.4
0.2	0.1	0.1			0.3	0.4
0.2	0.1	0.1			0.3	0.4
0.2	0.1	0.1			0.3	0.4
0.2	0.1	0.1			0.3	0.4
0.2	0.1	0.1			0.3	0.4
0.2	0.1	0.1			0.3	0.4
0.2	0.1	0.1			0.3	0.4
0.2	0.1	0.1			0.3	0.4
0.2	0.1	0.1			0.3	0.4
0.2	0.1	0.1			0.3	0.4
0.2	0.1	0.1			0.3	0.4
0.2	0.1	0.1			0.3	0.4
0.2	0.1	0.1			0.3	0.4
0.2	0.1	0.1			0.3	0.4
0.2	0.1	0.1			0.3	0.4
0.2	0.1	0.1			0.3	0.4
0.2	0.1	0.1			0.3	0.4
0.2	0.1	0.1			0.3	0.4
0.2	0.1	0.1			0.3	0.4
0.2	0.1	0.1			0.3	0.4
0.2	0.1	0.1			0.3	0.4
0.2	0.1	0.1			0.3	0.4
0.2	0.1	0.1			0.3	0.4
0.2	0.1	0.1			0.3	0.4
0.2	0.1	0.1			0.3	0.4
0.2	0.1	0.1			0.3	0.4
0.2	0.1	0.1			0.3	0.4
0.2	0.1	0.1			0.3	0.4
0.2	0.1	0.1			0.3	0.4
0.2	0.1	0.1			0.3	0.4
0.2	0.1	0.1			0.3	0.4
0.2	0.1	0.1			0.3	0.4
0.2	0.1	0.1			0.3	0.4
0.2	0.1	0.1			0.3	0.4
0.2	0.1	0.1			0.3	0.4
0.2	0.1	0.1			0.3	0.4
0.2	0.1	0.1			0.3	0.4
0.2	0.1	0.1			0.3	0.4
0.2	0.1	0.1			0.4	0.4
0.2	0.1	0.1			0.4	0.4
0.2	0.1	0.1			0.4	0.4
0.2	0.1	0.1			0.4	0.4
0.2	0.1	0.1			0.4	0.4
0.2	0.1	0.1			0.4	0.4
0.2	0.1	0.1			0.4	0.4
0.2	0.1	0.1			0.4	0.4
0.2	0.1	0.1			0.4	0.4
0.25	0.1	0.1			0.4	0.4
0.25	0.1	0.1			0.4	0.4
0.25	0.1	0.1			0.4	0.4
0.25	0.1	0.1			0.4	0.4
0.25	0.1	0.1			0.4	0.4
0.25	0.1	0.1			0.4	0.4
0.25	0.1	0.1			0.4	0.4
0.25	0.1	0.1			0.4	0.4
0.25	0.1	0.1			0.4	0.4
0.25	0.1	0.1			0.4	0.4
0.25	0.1	0.1			0.4	0.4
0.25	0.1	0.1			0.4	0.4
0.25	0.1	0.1			0.4	0.4
0.25	0.1	0.1			0.4	0.4
0.25	0.1	0.1			0.4	0.4
0.25	0.1	0.1			0.4	0.4
0.25	0.1	0.1			0.4	0.4
0.25	0.1	0.1			0.4	0.4
0.25	0.1	0.1			0.4	0.4
0.25	0.1	0.1			0.4	0.4
0.25	0.1	0.1			0.4	0.4
0.25	0.1	0.1			0.4	0.4
0.25	0.1	0.1			0.4	0.4
0.25	0.1	0.1			0.4	0.4
0.25	0.1	0.1			0.4	0.4
0.25	0.1	0.1			0.4	0.4
0.25	0.1	0.1			0.4	0.4
0.25	0.1	0.1			0.4	0.4
0.25	0.1	0.1			0.4	0.5
0.25	0.1	0.1			0.4	0.5
0.25	0.1	0.1			0.4	0.5
0.25	0.1	0.1			0.4	0.5
0.25	0.1	0.1			0.4	0.5
0.25	0.1	0.1			0.4	0.5
0.25	0.1	0.1			0.4	0.5
0.25	0.1	0.1			0.4	0.5
0.3	0.1	0.1			0.4	0.5
0.3	0.1	0.1			0.4	0.5
0.3	0.1	0.1			0.4	0.5
0.3	0.1	0.1			0.4	0.5
0.3	0.1	0.1			0.4	0.5
0.3	0.1	0.1			0.4	0.5
0.3	0.1	0.1			0.4	0.5
0.3	0.1	0.1			0.4	0.5
0.3	0.1	0.1			0.4	0.5
0.3	0.1	0.1			0.4	0.5
0.3	0.1	0.1			0.4	0.5
0.3	0.1	0.1			0.4	0.5
0.3	0.1	0.1			0.4	0.5
0.3	0.1	0.1			0.4	0.5
0.3	0.1	0.1			0.4	0.5
0.3	0.1	0.1			0.4	0.5
0.3	0.1	0.1			0.4	0.5
0.35	0.1	0.1			0.4	0.5
0.35	0.1	0.1			0.4	0.5
0.35	0.1	0.1			0.4	0.5
0.35	0.1	0.1			0.4	0.5
0.35	0.1	0.1			0.4	0.5
0.35	0.1	0.1			0.4	0.5
0.35	0.1	0.1			0.4	0.5
0.35	0.1	0.1			0.4	0.5
0.35	0.1	0.1			0.4	0.5
0.35	0.1	0.1			0.4	0.5
0.35	0.1	0.1			0.4	0.5
0.35	0.1	0.1			0.4	0.5
0.35	0.1	0.1			0.4	0.5
0.35	0.1	0.1			0.4	0.5
0.35	0.1	0.1			0.4	0.5
0.35	0.1	0.1			0.4	0.5
0.35	0.1	0.1			0.4	0.5
0.35	0.1	0.1			0.4	0.5
0.35	0.1	0.1			0.4	0.5
0.4	0.1	0.1			0.4	0.5
0.4	0.1	0.1			0.4	0.5
0.4	0.1	0.1			0.4	0.5
0.4	0.1	0.1			0.4	0.5
0.4	0.1	0.1			0.4	0.5
0.4	0.1	0.1			0.4	0.5
0.4	0.1	0.1			0.4	0.5
0.4	0.1	0.1			0.4	0.5
0.4	0.1	0.1			0.4	0.5
0.4	0.1	0.1			0.4	0.5
0.45	0.1	0.1			0.4	0.5
0.45	0.1	0.1			0.4	0.5
0.45	0.1	0.1			0.4	0.5
0.45	0.1	0.1			0.4	0.5
0.5	0.1	0.1			0.4	0.5
0.5	0.1	0.1			0.4	0.5
0.5	0.1	0.1			0.4	0.5
0.5	0.1	0.1			0.4	0.5
0.5	0.1	0.1			0.4	0.5
0.5	0.1	0.1			0.4	0.5
0.5	0.1	0.1			0.4	0.5
0.55	0.1	0.1			0.4	0.5
0.55	0.1	0.1			0.4	0.5
0.55	0.1	0.1			0.4	0.5
0.55	0.1	0.15			0.4	0.5
0.6	0.1	0.15			0.4	0.5
0.65	0.1	0.15			0.4	0.5
0.65	0.1	0.15			0.4	0.5
0.7	0.1	0.15			0.4	0.5
0.7	0.1	0.15			0.4	0.5
0.75	0.1	0.15			0.4	0.5
0.75	0.1	0.15			0.4	0.5
0.85	0.1	0.15			0.4	0.5
0.85	0.1	0.15			0.4	0.5
0.9	0.1	0.15			0.4	0.5
1	0.1	0.15			0.4	0.5
1.05	0.1	0.15			0.4	0.5
1.1	0.1	0.15			0.4	0.5
1.1	0.1	0.15			0.4	0.5
1.25	0.1	0.15			0.4	0.5
1.3	0.1	0.15			0.4	0.5
1.6	0.1	0.15			0.4	0.5
1.8	0.1	0.15			0.4	0.5
1.9	0.1	0.15			0.4	0.5
2.05	0.1	0.15			0.4	0.5
2.15	0.1	0.15			0.4	0.5
2.45	0.1	0.15			0.4	0.5
3	0.1	0.15			0.4	0.5
3.1	0.1	0.15			0.4	0.5
	0.1	0.15			0.4	0.5
	0.1	0.15			0.4	0.5
	0.1	0.15			0.4	0.5
	0.1	0.15			0.4	0.5
	0.1	0.15			0.4	0.5
	0.1	0.15			0.4	0.5
	0.1	0.15			0.4	0.5
	0.1	0.15			0.4	0.5
	0.1	0.15			0.4	0.5
	0.1	0.15			0.4	0.5
	0.1	0.15			0.4	0.5
	0.1	0.15			0.4	0.5
	0.1	0.15			0.4	0.5
	0.1	0.15			0.4	0.5
	0.1	0.15			0.4	0.5
	0.1	0.15			0.4	0.5
	0.1	0.15			0.4	0.5
	0.1	0.15			0.4	0.5
	0.1	0.15			0.4	0.5
	0.1	0.15			0.4	0.5
	0.1	0.15			0.4	0.5
	0.1	0.15			0.4	0.5
	0.1	0.15			0.4	0.5
	0.1	0.15			0.4	0.5
	0.15	0.15			0.4	0.5
	0.15	0.15			0.4	0.5
	0.15	0.15			0.4	0.5
	0.15	0.15			0.4	0.5
	0.15	0.15			0.4	0.5
	0.15	0.15			0.4	0.5
	0.15	0.15			0.4	0.5
	0.15	0.15			0.4	0.5
	0.15	0.15			0.4	0.5
	0.15	0.15			0.4	0.5
	0.15	0.15			0.4	0.5
	0.15	0.15			0.4	0.5
	0.15	0.15			0.4	0.5
	0.15	0.15			0.4	0.5
	0.15	0.15			0.4	0.5
	0.15	0.15			0.4	0.5
	0.15	0.15			0.4	0.5
	0.15	0.15			0.4	0.5
	0.15	0.15			0.4	0.5
	0.15	0.15			0.4	0.5
	0.15	0.15			0.4	0.5
	0.15	0.15			0.4	0.5
	0.15	0.15			0.4	0.5
	0.15	0.15			0.4	0.5
	0.15	0.15			0.4	0.5
	0.15	0.15			0.4	0.5
	0.15	0.15			0.4	0.5
	0.15	0.15			0.4	0.5
	0.15	0.15			0.4	0.5
	0.15	0.15			0.4	0.5
	0.15	0.15			0.4	0.5
	0.15	0.15			0.4	0.5
	0.15	0.15			0.4	0.5
	0.15	0.15			0.4	0.5
	0.15	0.15			0.4	0.5
	0.15	0.15			0.4	0.5
	0.15	0.15			0.4	0.5
	0.15	0.15			0.4	0.5
	0.15	0.15			0.4	0.5
	0.15	0.15			0.4	0.5
	0.15	0.15			0.4	0.5
	0.15	0.15			0.4	0.5
	0.15	0.15			0.4	0.5
	0.15	0.15			0.4	0.5
	0.15	0.15			0.4	0.5
	0.15	0.15			0.4	0.5
	0.15	0.15			0.4	0.5
	0.15	0.15			0.4	0.5
	0.15	0.15			0.4	0.5
	0.15	0.15			0.4	0.5
	0.15	0.15			0.4	0.5
	0.15	0.15			0.4	0.5
	0.15	0.15			0.4	0.5
	0.15	0.15			0.4	0.5
	0.15	0.15			0.4	0.5
	0.15	0.15			0.4	0.5
	0.15	0.15			0.4	0.5
	0.15	0.15			0.4	0.5
	0.15	0.15			0.4	0.5
	0.15	0.15			0.4	0.5
	0.15	0.15			0.4	0.5
	0.15	0.15			0.4	0.5
	0.15	0.15			0.4	0.5
	0.15	0.15			0.4	0.6
	0.15	0.15			0.4	0.6
	0.15	0.15			0.4	0.6
	0.15	0.15			0.4	0.6
	0.15	0.15			0.4	0.6
	0.15	0.15			0.4	0.6
	0.15	0.15			0.4	0.6
	0.15	0.15			0.4	0.6
	0.15	0.15			0.5	0.6
	0.15	0.15			0.5	0.6
	0.15	0.15			0.5	0.6
	0.15	0.15			0.5	0.6
	0.15	0.15			0.5	0.6
	0.15	0.2			0.5	0.6
	0.15	0.2			0.5	0.6
	0.15	0.2			0.5	0.6
	0.15	0.2			0.5	0.6
	0.15	0.2			0.5	0.6
	0.15	0.2			0.5	0.6
	0.15	0.2			0.5	0.6
	0.15	0.2			0.5	0.6
	0.15	0.2			0.5	0.6
	0.15	0.2			0.5	0.6
	0.15	0.2			0.5	0.6
	0.15	0.2			0.5	0.6
	0.15	0.2			0.5	0.6
	0.15	0.2			0.5	0.6
	0.15	0.2			0.5	0.6
	0.15	0.2			0.5	0.6
	0.15	0.2			0.5	0.6
	0.15	0.2			0.5	0.6
	0.15	0.2			0.5	0.6
	0.15	0.2			0.5	0.6
	0.15	0.2			0.5	0.6
	0.15	0.2			0.5	0.6
	0.15	0.2			0.5	0.6
	0.15	0.2			0.5	0.6
	0.15	0.2			0.5	0.6
	0.15	0.2			0.5	0.6
	0.15	0.2			0.5	0.6
	0.15	0.2			0.5	0.6
	0.15	0.2			0.5	0.6
	0.15	0.2			0.5	0.6
	0.15	0.2			0.5	0.6
	0.15	0.2			0.5	0.6
	0.15	0.2			0.5	0.6
	0.15	0.2			0.5	0.6
	0.15	0.2			0.5	0.6
	0.15	0.2			0.5	0.6
	0.15	0.2			0.5	0.6
	0.15	0.2			0.5	0.6
	0.15	0.2			0.5	0.6
	0.15	0.2			0.5	0.6
	0.15	0.2			0.5	0.6
	0.15	0.2			0.5	0.6
	0.15	0.2			0.5	0.6
	0.15	0.2			0.5	0.6
	0.15	0.2			0.5	0.6
	0.15	0.2			0.5	0.6
	0.15	0.2			0.5	0.6
	0.15	0.2			0.5	0.6
	0.15	0.2			0.5	0.6
	0.15	0.2			0.5	0.6
	0.15	0.2			0.5	0.6
	0.15	0.2			0.5	0.6
	0.15	0.2			0.5	0.6
	0.2	0.2			0.5	0.6
	0.2	0.2			0.5	0.6
	0.2	0.2			0.5	0.6
	0.2	0.2			0.5	0.6
	0.2	0.2			0.5	0.6
	0.2	0.2			0.5	0.6
	0.2	0.2			0.5	0.6
	0.2	0.2			0.5	0.6
	0.2	0.2			0.5	0.6
	0.2	0.2			0.5	0.6
	0.2	0.2			0.5	0.6
	0.2	0.2			0.5	0.6
	0.2	0.2			0.5	0.6
	0.2	0.2			0.5	0.6
	0.2	0.2			0.5	0.6
	0.2	0.2			0.5	0.6
	0.2	0.2			0.5	0.6
	0.2	0.2			0.5	0.6
	0.2	0.2			0.5	0.6
	0.2	0.2			0.5	0.6
	0.2	0.2			0.5	0.6
	0.2	0.2			0.5	0.6
	0.2	0.2			0.5	0.6
	0.2	0.2			0.5	0.6
	0.2	0.25			0.5	0.6
	0.2	0.25			0.5	0.6
	0.2	0.25			0.5	0.6
	0.2	0.25			0.5	0.6
	0.2	0.25			0.5	0.6
	0.2	0.25			0.5	0.6
	0.2	0.25			0.5	0.6
	0.2	0.25			0.5	0.6
	0.2	0.25			0.5	0.6
	0.2	0.25			0.5	0.6
	0.2	0.25			0.5	0.6
	0.2	0.25			0.5	0.6
	0.2	0.25			0.5	0.6
	0.2	0.25			0.5	0.6
	0.2	0.25			0.5	0.6
	0.2	0.25			0.5	0.6
	0.2	0.25			0.5	0.6
	0.2	0.25			0.5	0.6
	0.2	0.25			0.5	0.6
	0.2	0.25			0.5	0.6
	0.2	0.25			0.5	0.6
	0.2	0.25			0.5	0.6
	0.2	0.25			0.5	0.6
	0.2	0.25			0.5	0.6
	0.2	0.25			0.5	0.6
	0.2	0.25			0.5	0.6
	0.2	0.25			0.5	0.6
	0.2	0.25			0.5	0.6
	0.2	0.25			0.5	0.6
	0.2	0.25			0.5	0.6
	0.2	0.25			0.5	0.6
	0.2	0.25			0.5	0.6
	0.2	0.25			0.5	0.6
	0.2	0.25			0.5	0.6
	0.2	0.25			0.5	0.6
	0.2	0.25			0.5	0.6
	0.2	0.25			0.5	0.6
	0.2	0.25			0.5	0.6
	0.2	0.25			0.5	0.6
	0.2	0.25			0.5	0.6
	0.2	0.25			0.5	0.6
	0.2	0.25			0.5	0.6
	0.2	0.25			0.5	0.6
	0.2	0.25			0.5	0.6
	0.2	0.25			0.5	0.6
	0.2	0.25			0.5	0.6
	0.2	0.25			0.5	0.6
	0.2	0.25			0.5	0.6
	0.2	0.25			0.5	0.6
	0.2	0.25			0.5	0.6
	0.2	0.25			0.5	0.6
	0.2	0.25			0.5	0.6
	0.2	0.25			0.5	0.6
	0.2	0.3			0.5	0.6
	0.2	0.3			0.5	0.6
	0.2	0.3			0.5	0.6
	0.2	0.3			0.5	0.6
	0.2	0.3			0.5	0.6
	0.2	0.3			0.5	0.6
	0.2	0.3			0.5	0.7
	0.2	0.3			0.5	0.7
	0.2	0.3			0.5	0.7
	0.2	0.3			0.5	0.7
	0.2	0.3			0.5	0.7
	0.2	0.3			0.5	0.7
	0.2	0.3			0.5	0.7
	0.2	0.3			0.5	0.7
	0.2	0.3			0.5	0.7
	0.2	0.3			0.5	0.7
	0.2	0.3			0.5	0.7
	0.25	0.3			0.5	0.7
	0.25	0.3			0.5	0.7
	0.25	0.3			0.5	0.7
	0.25	0.3			0.5	0.7
	0.25	0.3			0.5	0.7
	0.25	0.3			0.5	0.7
	0.25	0.3			0.5	0.7
	0.25	0.3			0.5	0.7
	0.25	0.3			0.5	0.7
	0.25	0.3			0.5	0.7
	0.25	0.3			0.5	0.7
	0.25	0.3			0.5	0.7
	0.25	0.3			0.5	0.7
	0.25	0.3			0.5	0.7
	0.25	0.3			0.5	0.7
	0.25	0.3			0.5	0.7
	0.25	0.3			0.5	0.7
	0.25	0.3			0.5	0.7
	0.25	0.3			0.5	0.7
	0.25	0.3			0.5	0.7
	0.25	0.3			0.5	0.7
	0.25	0.3			0.5	0.7
	0.25	0.3			0.5	0.7
	0.25	0.3			0.5	0.7
	0.25	0.3			0.5	0.7
	0.25	0.3			0.5	0.7
	0.25	0.3			0.5	0.7
	0.25	0.3			0.5	0.7
	0.25	0.3			0.5	0.7
	0.25	0.3			0.5	0.7
	0.25	0.3			0.5	0.7
	0.25	0.3			0.5	0.7
	0.25	0.3			0.5	0.7
	0.25	0.3			0.5	0.7
	0.25	0.35			0.5	0.7
	0.25	0.35			0.6	0.7
	0.25	0.35			0.6	0.7
	0.25	0.35			0.6	0.7
	0.25	0.35			0.6	0.7
	0.25	0.35			0.6	0.7
	0.25	0.35			0.6	0.7
	0.25	0.35			0.6	0.7
	0.25	0.35			0.6	0.7
	0.25	0.35			0.6	0.7
	0.25	0.35			0.6	0.7
	0.25	0.35			0.6	0.7
	0.25	0.35			0.6	0.7
	0.25	0.35			0.6	0.7
	0.25	0.35			0.6	0.7
	0.25	0.4			0.6	0.7
	0.25	0.4			0.6	0.7
	0.25	0.4			0.6	0.7
	0.25	0.4			0.6	0.7
	0.25	0.4			0.6	0.7
	0.25	0.4			0.6	0.7
	0.25	0.4			0.6	0.7
	0.25	0.4			0.6	0.7
	0.25	0.4			0.6	0.7
	0.25	0.4			0.6	0.7
	0.25	0.4			0.6	0.7
	0.25	0.4			0.6	0.7
	0.25	0.4			0.6	0.7
	0.25	0.45			0.6	0.7
	0.25	0.45			0.6	0.7
	0.25	0.45			0.6	0.7
	0.25	0.45			0.6	0.7
	0.3	0.45			0.6	0.7
	0.3	0.45			0.6	0.7
	0.3	0.45			0.6	0.7
	0.3	0.45			0.6	0.7
	0.3	0.45			0.6	0.7
	0.3	0.5			0.6	0.7
	0.3	0.5			0.6	0.7
	0.3	0.5			0.6	0.7
	0.3	0.5			0.6	0.7
	0.3	0.5			0.6	0.7
	0.3	0.55			0.6	0.7
	0.3	0.55			0.6	0.7
	0.3	0.55			0.6	0.7
	0.3	0.55			0.6	0.7
	0.3	0.55			0.6	0.7
	0.3	0.55			0.6	0.7
	0.3	0.55			0.6	0.7
	0.3	0.55			0.6	0.7
	0.3	0.6			0.6	0.7
	0.3	0.6			0.6	0.7
	0.3	0.6			0.6	0.7
	0.3	0.6			0.6	0.7
	0.3	0.6			0.6	0.7
	0.3	0.6			0.6	0.7
	0.3	0.65			0.6	0.7
	0.3	0.65			0.6	0.7
	0.3	0.7			0.6	0.7
	0.3	0.75			0.6	0.7
	0.3	0.75			0.6	0.7
	0.3	0.75			0.6	0.7
	0.3	0.75			0.6	0.7
	0.3	0.75			0.6	0.7
	0.3	0.75			0.6	0.7
	0.3	0.8			0.6	0.7
	0.3	0.8			0.6	0.7
	0.3	0.8			0.6	0.7
	0.3	0.85			0.6	0.7
	0.3	0.85			0.6	0.7
	0.3	0.85			0.6	0.7
	0.3	0.85			0.6	0.7
	0.3	0.85			0.6	0.7
	0.3	0.85			0.6	0.7
	0.3	0.9			0.6	0.7
	0.3	0.9			0.6	0.7
	0.3	0.9			0.6	0.7
	0.3	0.9			0.6	0.7
	0.35	0.9			0.6	0.7
	0.35	1			0.6	0.7
	0.35	1.05			0.6	0.7
	0.35	1.05			0.6	0.7
	0.35	1.05			0.6	0.7
	0.35	1.1			0.6	0.7
	0.35	1.15			0.6	0.8
	0.35	1.15			0.6	0.8
	0.35	1.2			0.6	0.8
	0.35	1.2			0.6	0.8
	0.35	1.25			0.6	0.8
	0.35	1.35			0.6	0.8
	0.35	1.35			0.6	0.8
	0.35	1.4			0.6	0.8
	0.35	1.45			0.6	0.8
	0.35	1.45			0.6	0.8
	0.4	1.6			0.6	0.8
	0.4	1.6			0.6	0.8
	0.4	1.7			0.6	0.8
	0.4	1.85			0.6	0.8
	0.4	2.2			0.6	0.8
	0.4	2.2			0.6	0.8
	0.4	2.35			0.6	0.8
	0.4	3.15			0.6	0.8
	0.4				0.6	0.8
	0.4				0.6	0.8
	0.4				0.6	0.8
	0.4				0.6	0.8
	0.4				0.6	0.8
	0.4				0.6	0.8
	0.4				0.6	0.8
	0.4				0.6	0.8
	0.4				0.6	0.8
	0.4				0.6	0.8
	0.4				0.6	0.8
	0.45				0.6	0.8
	0.45				0.6	0.8
	0.45				0.6	0.8
	0.45				0.6	0.8
	0.45				0.6	0.8
	0.45				0.6	0.8
	0.45				0.6	0.8
	0.45				0.6	0.8
	0.45				0.6	0.8
	0.5				0.6	0.8
	0.5				0.6	0.8
	0.5				0.6	0.8
	0.5				0.6	0.8
	0.5				0.6	0.8
	0.5				0.6	0.8
	0.5				0.6	0.8
	0.5				0.6	0.8
	0.55				0.6	0.8
	0.55				0.6	0.8
	0.55				0.6	0.8
	0.55				0.6	0.8
	0.55				0.6	0.8
	0.6				0.6	0.8
	0.6				0.6	0.8
	0.6				0.6	0.8
	0.6				0.6	0.8
	0.6				0.6	0.8
	0.6				0.6	0.8
	0.6				0.6	0.8
	0.6				0.6	0.8
	0.6				0.6	0.8
	0.65				0.6	0.8
	0.65				0.6	0.8
	0.65				0.6	0.8
	0.65				0.6	0.8
	0.7				0.6	0.8
	0.7				0.6	0.8
	0.7				0.6	0.8
	0.7				0.6	0.8
	0.7				0.6	0.8
	0.7				0.6	0.8
	0.75				0.6	0.8
	0.75				0.6	0.8
	0.75				0.6	0.8
	0.75				0.6	0.8
	0.8				0.6	0.8
	0.8				0.6	0.8
	0.85				0.6	0.8
	0.85				0.6	0.8
	0.9				0.6	0.8
	0.95				0.6	0.8
	0.95				0.6	0.8
	0.95				0.6	0.8
	1.1				0.6	0.8
	1.2				0.7	0.8
	1.2				0.7	0.9
	1.25				0.7	0.9
	1.3				0.7	0.9
	1.3				0.7	0.9
	1.35				0.7	0.9
	1.35				0.7	0.9
	1.45				0.7	0.9
	1.8				0.7	0.9
	2				0.7	0.9
	2				0.7	0.9
	2.15				0.7	0.9
	2.25				0.7	0.9
	2.75				0.7	0.9
					0.7	0.9
					0.7	0.9
					0.7	0.9
					0.7	0.9
					0.7	0.9
					0.7	0.9
					0.7	0.9
					0.7	0.9
					0.7	0.9
					0.7	0.9
					0.7	0.9
					0.7	0.9
					0.7	0.9
					0.7	0.9
					0.7	0.9
					0.7	0.9
					0.7	0.9
					0.7	0.9
					0.7	0.9
					0.7	0.9
					0.7	0.9
					0.7	0.9
					0.7	0.9
					0.7	0.9
					0.7	0.9
					0.7	0.9
					0.7	0.9
					0.7	0.9
					0.7	0.9
					0.7	0.9
					0.7	0.9
					0.7	0.9
					0.7	0.9
					0.7	0.9
					0.7	0.9
					0.7	0.9
					0.7	0.9
					0.7	0.9
					0.7	0.9
					0.7	0.9
					0.7	0.9
					0.7	0.9
					0.7	0.9
					0.7	0.9
					0.7	0.9
					0.7	0.9
					0.7	0.9
					0.7	0.9
					0.7	0.9
					0.7	0.9
					0.7	0.9
					0.7	0.9
					0.7	0.9
					0.7	0.9
					0.7	0.9
					0.7	0.9
					0.7	1
					0.7	1
					0.7	1
					0.7	1
					0.7	1
					0.7	1
					0.7	1
					0.7	1
					0.7	1
					0.7	1
					0.7	1
					0.7	1
					0.7	1
					0.7	1
					0.7	1
					0.7	1
					0.7	1
					0.7	1
					0.7	1
					0.7	1
					0.7	1
					0.7	1
					0.7	1
					0.7	1
					0.7	1
					0.7	1
					0.7	1
					0.7	1
					0.7	1
					0.7	1
					0.7	1
					0.7	1
					0.7	1
					0.7	1
					0.7	1
					0.7	1
					0.7	1
					0.7	1
					0.7	1
					0.7	1
					0.7	1
					0.7	1
					0.7	1
					0.7	1
					0.7	1
					0.7	1
					0.7	1
					0.7	1
					0.7	1
					0.7	1
					0.7	1
					0.7	1
					0.7	1
					0.7	1
					0.7	1
					0.7	1
					0.7	1
					0.8	1
					0.8	1
					0.8	1
					0.8	1
					0.8	1
					0.8	1
					0.8	1
					0.8	1
					0.8	1
					0.8	1.1
					0.8	1.1
					0.8	1.1
					0.8	1.1
					0.8	1.1
					0.8	1.1
					0.8	1.1
					0.8	1.1
					0.8	1.1
					0.8	1.1
					0.8	1.1
					0.8	1.1
					0.8	1.1
					0.8	1.1
					0.8	1.1
					0.8	1.1
					0.8	1.1
					0.8	1.1
					0.8	1.1
					0.8	1.1
					0.8	1.1
					0.8	1.1
					0.8	1.1
					0.8	1.1
					0.8	1.1
					0.8	1.1
					0.8	1.1
					0.8	1.1
					0.8	1.1
					0.8	1.1
					0.8	1.1
					0.8	1.1
					0.8	1.1
					0.8	1.1
					0.8	1.1
					0.8	1.1
					0.8	1.1
					0.8	1.1
					0.8	1.1
					0.8	1.1
					0.8	1.1
					0.8	1.1
					0.8	1.1
					0.8	1.1
					0.8	1.1
					0.8	1.1
					0.8	1.1
					0.8	1.1
					0.8	1.1
					0.8	1.1
					0.8	1.1
					0.8	1.1
					0.8	1.1
					0.8	1.1
					0.8	1.1
					0.8	1.1
					0.8	1.1
					0.8	1.1
					0.8	1.1
					0.8	1.1
					0.8	1.1
					0.8	1.1
					0.8	1.1
					0.8	1.1
					0.8	1.1
					0.8	1.1
					0.8	1.2
					0.8	1.2
					0.8	1.2
					0.8	1.2
					0.8	1.2
					0.8	1.2
					0.8	1.2
					0.8	1.2
					0.8	1.2
					0.8	1.2
					0.8	1.2
					0.8	1.2
					0.8	1.2
					0.8	1.2
					0.8	1.2
					0.8	1.2
					0.8	1.2
					0.8	1.2
					0.8	1.2
					0.8	1.2
					0.8	1.2
					0.9	1.2
					0.9	1.2
					0.9	1.2
					0.9	1.2
					0.9	1.2
					0.9	1.2
					0.9	1.2
					0.9	1.2
					0.9	1.2
					0.9	1.2
					0.9	1.2
					0.9	1.2
					0.9	1.2
					0.9	1.2
					0.9	1.2
					0.9	1.2
					0.9	1.2
					0.9	1.2
					0.9	1.2
					0.9	1.2
					0.9	1.2
					0.9	1.2
					0.9	1.2
					0.9	1.2
					0.9	1.2
					0.9	1.2
					0.9	1.2
					0.9	1.2
					0.9	1.2
					0.9	1.2
					0.9	1.2
					0.9	1.2
					0.9	1.3
					0.9	1.3
					0.9	1.3
					0.9	1.3
					0.9	1.3
					0.9	1.3
					0.9	1.3
					0.9	1.3
					0.9	1.3
					0.9	1.3
					0.9	1.3
					0.9	1.3
					0.9	1.3
					0.9	1.3
					0.9	1.3
					0.9	1.3
					0.9	1.3
					0.9	1.3
					0.9	1.3
					0.9	1.3
					0.9	1.3
					0.9	1.3
					0.9	1.3
					0.9	1.3
					0.9	1.3
					0.9	1.3
					0.9	1.3
					0.9	1.3
					0.9	1.3
					0.9	1.3
					0.9	1.3
					0.9	1.3
					0.9	1.3
					0.9	1.3
					0.9	1.3
					0.9	1.3
					0.9	1.3
					0.9	1.3
					0.9	1.3
					0.9	1.3
					0.9	1.3
					0.9	1.3
					0.9	1.3
					0.9	1.3
					0.9	1.3
					0.9	1.3
					0.9	1.3
					0.9	1.3
					0.9	1.3
					0.9	1.3
					0.9	1.3
					0.9	1.4
					0.9	1.4
					0.9	1.4
					0.9	1.4
					0.9	1.4
					0.9	1.4
					0.9	1.4
					1	1.4
					1	1.4
					1	1.4
					1	1.4
					1	1.4
					1	1.4
					1	1.4
					1	1.4
					1	1.4
					1	1.4
					1	1.4
					1	1.4
					1	1.4
					1	1.4
					1	1.4
					1	1.4
					1	1.4
					1	1.4
					1	1.4
					1	1.4
					1	1.4
					1	1.4
					1	1.4
					1	1.4
					1	1.4
					1	1.4
					1	1.4
					1	1.4
					1	1.4
					1	1.4
					1	1.4
					1	1.4
					1	1.4
					1	1.4
					1	1.4
					1	1.4
					1	1.4
					1	1.4
					1	1.4
					1	1.4
					1	1.4
					1	1.4
					1	1.4
					1	1.4
					1	1.4
					1	1.4
					1	1.4
					1	1.4
					1	1.4
					1	1.4
					1	1.4
					1	1.5
					1	1.5
					1	1.5
					1	1.5
					1	1.5
					1	1.5
					1	1.5
					1	1.5
					1	1.5
					1	1.5
					1	1.5
					1	1.5
					1	1.5
					1	1.5
					1	1.5
					1.1	1.5
					1.1	1.5
					1.1	1.5
					1.1	1.5
					1.1	1.5
					1.1	1.5
					1.1	1.5
					1.1	1.5
					1.1	1.5
					1.1	1.5
					1.1	1.5
					1.1	1.5
					1.1	1.5
					1.1	1.5
					1.1	1.5
					1.1	1.5
					1.1	1.5
					1.1	1.5
					1.1	1.5
					1.1	1.5
					1.1	1.5
					1.1	1.5
					1.1	1.5
					1.1	1.5
					1.1	1.5
					1.1	1.5
					1.1	1.5
					1.1	1.5
					1.1	1.5
					1.1	1.5
					1.1	1.6
					1.1	1.6
					1.1	1.6
					1.1	1.6
					1.1	1.6
					1.1	1.6
					1.1	1.6
					1.1	1.6
					1.1	1.6
					1.1	1.6
					1.1	1.6
					1.1	1.6
					1.1	1.6
					1.1	1.6
					1.2	1.6
					1.2	1.6
					1.2	1.6
					1.2	1.6
					1.2	1.6
					1.2	1.6
					1.2	1.6
					1.2	1.6
					1.2	1.6
					1.2	1.6
					1.2	1.6
					1.2	1.6
					1.2	1.6
					1.2	1.6
					1.2	1.6
					1.2	1.7
					1.2	1.7
					1.2	1.7
					1.2	1.7
					1.2	1.7
					1.2	1.7
					1.2	1.7
					1.2	1.7
					1.2	1.7
					1.2	1.7
					1.2	1.7
					1.2	1.7
					1.2	1.7
					1.2	1.7
					1.2	1.7
					1.2	1.7
					1.2	1.7
					1.2	1.7
					1.2	1.7
					1.2	1.7
					1.2	1.7
					1.2	1.7
					1.2	1.7
					1.2	1.7
					1.2	1.7
					1.2	1.8
					1.2	1.8
					1.2	1.8
					1.3	1.8
					1.3	1.8
					1.3	1.8
					1.3	1.8
					1.3	1.8
					1.3	1.8
					1.3	1.8
					1.3	1.8
					1.3	1.8
					1.3	1.8
					1.3	1.8
					1.3	1.8
					1.3	1.8
					1.3	1.8
					1.3	1.8
					1.3	1.9
					1.3	1.9
					1.3	1.9
					1.3	1.9
					1.3	1.9
					1.3	1.9
					1.3	1.9
					1.3	1.9
					1.3	1.9
					1.3	1.9
					1.3	1.9
					1.3	1.9
					1.3	1.9
					1.3	1.9
					1.3	1.9
					1.3	1.9
					1.3	1.9
					1.3	1.9
					1.3	2
					1.3	2
					1.3	2
					1.3	2
					1.3	2
					1.3	2
					1.3	2
					1.4	2
					1.4	2
					1.4	2
					1.4	2
					1.4	2
					1.4	2
					1.4	2.1
					1.4	2.1
					1.4	2.1
					1.4	2.1
					1.4	2.1
					1.4	2.1
					1.4	2.1
					1.4	2.1
					1.4	2.1
					1.4	2.1
					1.4	2.1
					1.4	2.1
					1.4	2.2
					1.4	2.2
					1.4	2.2
					1.4	2.2
					1.4	2.2
					1.4	2.2
					1.4	2.2
					1.4	2.2
					1.4	2.2
					1.4	2.2
					1.4	2.3
					1.4	2.3
					1.4	2.3
					1.4	2.3
					1.4	2.3
					1.4	2.3
					1.4	2.3
					1.4	2.3
					1.4	2.3
					1.4	2.3
					1.4	2.3
					1.4	2.3
					1.4	2.3
					1.4	2.3
					1.5	2.4
					1.5	2.4
					1.5	2.4
					1.5	2.4
					1.5	2.4
					1.5	2.4
					1.5	2.4
					1.5	2.4
					1.5	2.4
					1.5	2.4
					1.5	2.5
					1.5	2.5
					1.5	2.5
					1.5	2.5
					1.5	2.5
					1.5	2.5
					1.5	2.5
					1.5	2.5
					1.5	2.5
					1.5	2.5
					1.6	2.5
					1.6	2.5
					1.6	2.5
					1.6	2.6
					1.6	2.6
					1.6	2.7
					1.6	2.7
					1.6	2.7
					1.6	2.7
					1.6	2.7
					1.6	2.7
					1.6	2.8
					1.6	2.8
					1.6	2.8
					1.6	2.8
					1.6	2.9
					1.6	2.9
					1.6	2.9
					1.6	2.9
					1.6	2.9
					1.7	2.9
					1.7	3
					1.7	3
					1.7	3
					1.7	3.1
					1.7	3.1
					1.7	3.1
					1.7	3.1
					1.7	3.1
					1.7	3.2
					1.7	3.2
					1.7	3.2
					1.7	3.3
					1.8	3.3
					1.8	3.3
					1.8	3.4
					1.8	3.6
					1.8	3.6
					1.8	3.7
					1.8	3.8
					1.8	3.8
					1.8	3.8
					1.8	3.9
					1.8	3.9
					1.8	4
					1.8	4.2
					1.9	4.3
					1.9	4.3
					1.9	4.5
					1.9	4.5
					1.9	4.5
					1.9	4.6
					1.9	4.6
					1.9	4.6
					1.9	4.6
					1.9	4.6
					1.9	4.8
					1.9	4.9
					1.9	5.2
					1.9	5.4
					1.9	6
					1.9	6.9
					1.9	6.9
					1.9	8.9
					1.9
					1.9
					2
					2
					2
					2
					2
					2
					2
					2
					2
					2
					2
					2.1
					2.1
					2.1
					2.1
					2.1
					2.1
					2.1
					2.1
					2.1
					2.1
					2.1
					2.1
					2.1
					2.1
					2.2
					2.2
					2.2
					2.2
					2.2
					2.3
					2.3
					2.3
					2.3
					2.3
					2.3
					2.3
					2.3
					2.4
					2.4
					2.4
					2.5
					2.5
					2.5
					2.5
					2.5
					2.5
					2.5
					2.5
					2.6
					2.6
					2.6
					2.7
					2.7
					2.7
					2.7
[truncated: 34 more rows]
