# Supplementary material for: Membrane-mediated dimerization potentiates PIP5K lipid kinase activity
Source: eLife. 2022 Aug 17;11:e73747. doi: 10.7554/eLife.73747 (PMC9470164; doi:10.7554/eLife.73747)
Supplement: Figure 3—source data 2. [file elife-73747-fig3-data2.xlsx]

## Sheet: Figure 3D
Figure 3D
Single molecule dwell times for Ax647-5KB (D15R) (raw data, sorted) units = sec													Cumulative frequency distributions for Ax647-5KB (D51R) dwell times
mov 1 (1% PIP2)	mov 2 (1% PIP2)	mov 3 (1% PIP2)	mov 4 (1% PIP2)		mov 1 (2% PIP2)	mov 2 (2% PIP2)	mov 3 (2% PIP2)		mov 1 (4% PIP2)	mov 2 (4% PIP2)	mov 3 (4% PIP2)		time (sec) Bin Center	mov 1 (1% PIP2)	mov 2 (1% PIP2)	mov 3 (1% PIP2)	mov 4 (1% PIP2)		time (sec) Bin Center	mov 1 (2% PIP2)	mov 2 (2% PIP2)	mov 3 (2% PIP2)		time (sec) Bin Center	mov 1 (4% PIP2)	mov 2 (4% PIP2)	mov 3 (4% PIP2)		FINAL STATISTICS
0.05	0.05	0.05	0.05		0.2	0.2	0.2		0.2	0.2	0.2		0	0	0	0	0		0	0	0	0		0	0	0	0		Ax647-5KB(D51R, 1% PIP2)_DWELL TIMES	movie	mov1	mov2	mov3	mov4	AVE	SD
0.05	0.05	0.05	0.05		0.2	0.2	0.2		0.2	0.2	0.2		0.05	0.491026	0.465812	0.460886	0.518004		0.1	0	0	0		0.1	0	0	0			T1	0.08285	0.1029	0.09228	0.08171	0.089935	0.00985627
0.05	0.05	0.05	0.05		0.2	0.2	0.2		0.2	0.2	0.2		0.1	0.725641	0.653846	0.6918	0.735792		0.2	0.223799	0.175727	0.20479		0.2	0.126984	0.143284	0.117727			N	780	702	1061	2305	4848
0.05	0.05	0.05	0.05		0.2	0.2	0.2		0.2	0.2	0.2		0.15	0.832051	0.769231	0.809614	0.823861		0.3	0.373362	0.304678	0.338922		0.3	0.229025	0.214925	0.186739
0.05	0.05	0.05	0.05		0.2	0.2	0.2		0.2	0.2	0.2		0.2	0.883333	0.839031	0.868992	0.87679		0.4	0.487991	0.418458	0.450299		0.4	0.287982	0.292537	0.248985		Ax647-5KB(D51R, 2% PIP2)_DWELL TIMES	movie	mov1	mov2	mov3		AVE	SD
0.05	0.05	0.05	0.05		0.2	0.2	0.2		0.2	0.2	0.2		0.25	0.919231	0.88604	0.893497	0.907158		0.5	0.586245	0.513274	0.513772		0.5	0.319728	0.329851	0.300406			T1	0.6032	0.6567	0.6876		0.649167	0.0427013
0.05	0.05	0.05	0.05		0.2	0.2	0.2		0.2	0.2	0.2		0.3	0.932051	0.897436	0.920829	0.926247		0.6	0.670306	0.59292	0.588024		0.6	0.353741	0.385075	0.332882			N	916	791	835		2542
0.05	0.05	0.05	0.05		0.2	0.2	0.2		0.2	0.2	0.2		0.35	0.946154	0.917379	0.93591	0.935792		0.7	0.713974	0.661188	0.65988		0.7	0.387755	0.441791	0.37889
0.05	0.05	0.05	0.05		0.2	0.2	0.2		0.2	0.2	0.2		0.4	0.953846	0.931624	0.942507	0.942733		0.8	0.758734	0.725664	0.699401		0.8	0.412698	0.479104	0.416779		Ax647-5KB(D51R, 4% PIP2)_DWELL TIMES	movie	mov1	mov2	mov3		AVE	SD
0.05	0.05	0.05	0.05		0.2	0.2	0.2		0.2	0.2	0.2		0.45	0.964103	0.933048	0.948162	0.950976		0.9	0.798035	0.77244	0.741317		0.9	0.453515	0.514925	0.445196			alpha	0.6048	0.5913	0.5438		0.579967	0.0320403
0.05	0.05	0.05	0.05		0.2	0.2	0.2		0.2	0.2	0.2		0.5	0.967949	0.935897	0.955702	0.95705		1	0.832969	0.798989	0.768862		1	0.489796	0.537313	0.469553			T1	0.9024	0.775	0.9144		0.863933	0.0772519
0.05	0.05	0.05	0.05		0.2	0.2	0.2		0.2	0.2	0.2		0.55	0.971795	0.937322	0.957587	0.960521		1.1	0.84607	0.830594	0.803593		1.1	0.507937	0.558209	0.49797			T2	4.39	3.843	3.677		3.97	0.37308
0.05	0.05	0.05	0.05		0.2	0.2	0.2		0.2	0.2	0.2		0.6	0.976923	0.940171	0.961357	0.965293		1.2	0.864629	0.85335	0.82994		1.2	0.537415	0.585075	0.52774			N	441	670	739		1850
0.05	0.05	0.05	0.05		0.2	0.2	0.2		0.2	0.2	0.2		0.65	0.976923	0.947293	0.967012	0.967896		1.3	0.882096	0.882427	0.852695		1.3	0.555556	0.59403	0.546685
0.05	0.05	0.05	0.05		0.2	0.2	0.2		0.2	0.2	0.2		0.7	0.976923	0.952991	0.970782	0.971367		1.4	0.898472	0.902655	0.873054		1.4	0.575964	0.614925	0.566982
0.05	0.05	0.05	0.05		0.2	0.2	0.2		0.2	0.2	0.2		0.75	0.979487	0.95584	0.971725	0.97397		1.5	0.911572	0.917826	0.891018		1.5	0.605442	0.634328	0.588633
0.05	0.05	0.05	0.05		0.2	0.2	0.2		0.2	0.2	0.2		0.8	0.982051	0.957265	0.972667	0.975705		1.6	0.919214	0.931732	0.906587		1.6	0.61678	0.643284	0.611637
0.05	0.05	0.05	0.05		0.2	0.2	0.2		0.2	0.2	0.2		0.85	0.984615	0.958689	0.97361	0.977007		1.7	0.930131	0.940582	0.918563		1.7	0.637188	0.655224	0.622463
0.05	0.05	0.05	0.05		0.2	0.2	0.2		0.2	0.2	0.2		0.9	0.984615	0.958689	0.976437	0.977007		1.8	0.939956	0.946903	0.928144		1.8	0.653061	0.668657	0.635995
0.05	0.05	0.05	0.05		0.2	0.2	0.2		0.2	0.2	0.2		0.95	0.987179	0.961538	0.97738	0.978308		1.9	0.946507	0.962073	0.941317		1.9	0.664399	0.680597	0.65088
0.05	0.05	0.05	0.05		0.2	0.2	0.2		0.2	0.2	0.2		1	0.989744	0.964387	0.979265	0.980043		2	0.950873	0.972187	0.948503		2	0.668934	0.697015	0.664411
0.05	0.05	0.05	0.05		0.2	0.2	0.2		0.2	0.2	0.2		1.05	0.989744	0.970085	0.98115	0.981779		2.1	0.956332	0.97598	0.956886		2.1	0.687075	0.70597	0.677943
0.05	0.05	0.05	0.05		0.2	0.2	0.2		0.2	0.2	0.2		1.1	0.989744	0.974359	0.982092	0.98308		2.2	0.960699	0.983565	0.966467		2.2	0.698413	0.719403	0.698241
0.05	0.05	0.05	0.05		0.2	0.2	0.2		0.2	0.2	0.2		1.15	0.991026	0.974359	0.983035	0.98308		2.3	0.965066	0.984829	0.967665		2.3	0.712018	0.734328	0.715832
0.05	0.05	0.05	0.05		0.2	0.2	0.2		0.2	0.2	0.2		1.2	0.992308	0.975783	0.983035	0.98308		2.4	0.966157	0.987358	0.972455		2.4	0.718821	0.750746	0.725304
0.05	0.05	0.05	0.05		0.2	0.2	0.2		0.2	0.2	0.2		1.25	0.99359	0.977208	0.983035	0.986117		2.5	0.967249	0.989886	0.97485		2.5	0.727891	0.758209	0.73207
0.05	0.05	0.05	0.05		0.2	0.2	0.2		0.2	0.2	0.2		1.3	0.99359	0.978632	0.983035	0.987852		2.6	0.971616	0.989886	0.977246		2.6	0.746032	0.771642	0.742896
0.05	0.05	0.05	0.05		0.2	0.2	0.2		0.2	0.2	0.2		1.35	0.99359	0.978632	0.98492	0.988286		2.7	0.978166	0.994943	0.982036		2.7	0.755102	0.779104	0.755074
0.05	0.05	0.05	0.05		0.2	0.2	0.2		0.2	0.2	0.2		1.4	0.99359	0.978632	0.98492	0.990456		2.8	0.980349	0.996207	0.982036		2.8	0.768707	0.78806	0.7659
0.05	0.05	0.05	0.05		0.2	0.2	0.2		0.2	0.2	0.2		1.45	0.994872	0.978632	0.98492	0.990889		2.9	0.982533	0.997472	0.982036		2.9	0.773243	0.792537	0.776725
0.05	0.05	0.05	0.05		0.2	0.2	0.2		0.2	0.2	0.2		1.5	0.994872	0.980057	0.985862	0.991757		3	0.9869	0.998736	0.982036		3	0.786848	0.8	0.788904
0.05	0.05	0.05	0.05		0.2	0.2	0.2		0.2	0.2	0.2		1.55	0.994872	0.980057	0.985862	0.991757		3.1	0.989083	1	0.983234		3.1	0.791383	0.80597	0.79161
0.05	0.05	0.05	0.05		0.2	0.2	0.2		0.2	0.2	0.2		1.6	0.994872	0.982906	0.986805	0.993059		3.2	0.990175		0.985629		3.2	0.800454	0.81194	0.79567
0.05	0.05	0.05	0.05		0.2	0.2	0.2		0.2	0.2	0.2		1.65	0.994872	0.982906	0.986805	0.994794		3.3	0.991266		0.990419		3.3	0.807256	0.814925	0.803789
0.05	0.05	0.05	0.05		0.2	0.2	0.2		0.2	0.2	0.2		1.7	0.994872	0.98433	0.987747	0.995662		3.4	0.992358		0.991617		3.4	0.811791	0.822388	0.810555
0.05	0.05	0.05	0.05		0.2	0.2	0.2		0.2	0.2	0.2		1.75	0.994872	0.98433	0.987747	0.996529		3.5	0.992358		0.992814		3.5	0.818594	0.826866	0.811908
0.05	0.05	0.05	0.05		0.2	0.2	0.2		0.2	0.2	0.2		1.8	0.996154	0.985755	0.987747	0.996529		3.6	0.996725		0.994012		3.6	0.818594	0.829851	0.817321
0.05	0.05	0.05	0.05		0.2	0.2	0.2		0.2	0.2	0.2		1.85	0.996154	0.985755	0.98869	0.996963		3.7	0.998908		0.994012		3.7	0.823129	0.837313	0.824087
0.05	0.05	0.05	0.05		0.2	0.2	0.2		0.2	0.2	0.2		1.9	0.996154	0.985755	0.98869	0.997397		3.8	0.998908		0.99521		3.8	0.829932	0.846269	0.828146
0.05	0.05	0.05	0.05		0.2	0.2	0.2		0.2	0.2	0.2		1.95	0.996154	0.987179	0.98869	0.997397		3.9	0.998908		0.997605		3.9	0.839002	0.850746	0.837618
0.05	0.05	0.05	0.05		0.2	0.2	0.2		0.2	0.2	0.2		2	0.996154	0.988604	0.98869	0.997831		4	1		0.997605		4	0.84127	0.853731	0.847091
0.05	0.05	0.05	0.05		0.2	0.2	0.2		0.2	0.2	0.2		2.05	0.996154	0.990028	0.989632	0.997831		4.1			0.997605		4.1	0.85034	0.859701	0.849797
0.05	0.05	0.05	0.05		0.2	0.2	0.2		0.2	0.2	0.2		2.1	0.996154	0.992877	0.990575	0.997831		4.2			0.997605		4.2	0.85034	0.862687	0.849797
0.05	0.05	0.05	0.05		0.2	0.2	0.2		0.2	0.2	0.2		2.15	0.997436	0.992877	0.990575	0.997831		4.3			0.998802		4.3	0.852608	0.868657	0.853857
0.05	0.05	0.05	0.05		0.2	0.2	0.2		0.2	0.2	0.2		2.2	0.997436	0.992877	0.990575	0.999566		4.4			0.998802		4.4	0.854875	0.874627	0.857916
0.05	0.05	0.05	0.05		0.2	0.2	0.2		0.2	0.2	0.2		2.25	0.997436	0.992877	0.990575	1		4.5			0.998802		4.5	0.857143	0.88209	0.861976
0.05	0.05	0.05	0.05		0.2	0.2	0.2		0.2	0.2	0.2		2.3	0.997436	0.992877	0.990575			4.6			0.998802		4.6	0.857143	0.885075	0.861976
0.05	0.05	0.05	0.05		0.2	0.2	0.2		0.2	0.2	0.2		2.35	0.997436	0.994302	0.993402			4.7			1		4.7	0.861678	0.889552	0.863329
0.05	0.05	0.05	0.05		0.2	0.2	0.2		0.2	0.2	0.2		2.4	0.997436	0.994302	0.993402								4.8	0.861678	0.891045	0.866035
0.05	0.05	0.05	0.05		0.2	0.2	0.2		0.2	0.2	0.2		2.45	0.997436	0.994302	0.995287								4.9	0.863946	0.89403	0.870095
0.05	0.05	0.05	0.05		0.2	0.2	0.2		0.2	0.2	0.2		2.5	0.997436	0.994302	0.995287								5	0.863946	0.895522	0.871448
0.05	0.05	0.05	0.05		0.2	0.2	0.2		0.2	0.2	0.2		2.55	0.997436	0.994302	0.995287								5.1	0.868481	0.898507	0.874154
0.05	0.05	0.05	0.05		0.2	0.2	0.2		0.2	0.2	0.2		2.6	0.997436	0.995726	0.995287								5.2	0.870748	0.902985	0.878214
0.05	0.05	0.05	0.05		0.2	0.2	0.2		0.2	0.2	0.2		2.65	0.997436	0.995726	0.997172								5.3	0.877551	0.904478	0.88092
0.05	0.05	0.05	0.05		0.2	0.2	0.2		0.2	0.2	0.2		2.7	0.997436	0.995726	0.997172								5.4	0.882086	0.907463	0.88498
0.05	0.05	0.05	0.05		0.2	0.2	0.2		0.2	0.2	0.2		2.75	0.997436	0.997151	0.997172								5.5	0.882086	0.910448	0.887686
0.05	0.05	0.05	0.05		0.2	0.2	0.2		0.3	0.2	0.2		2.8	0.997436	0.997151	0.997172								5.6	0.884354	0.913433	0.891746
0.05	0.05	0.05	0.05		0.2	0.2	0.2		0.3	0.2	0.2		2.85	0.997436	0.997151	0.999057								5.7	0.884354	0.916418	0.895805
0.05	0.05	0.05	0.05		0.2	0.2	0.2		0.3	0.2	0.2		2.9	0.997436	0.997151	0.999057								5.8	0.884354	0.916418	0.902571
0.05	0.05	0.05	0.05		0.2	0.2	0.2		0.3	0.2	0.2		2.95	0.997436	0.998575	0.999057								5.9	0.886621	0.919403	0.907984
0.05	0.05	0.05	0.05		0.2	0.2	0.2		0.3	0.2	0.2		3	0.998718	0.998575	0.999057								6	0.893424	0.919403	0.913396
0.05	0.05	0.05	0.05		0.2	0.2	0.2		0.3	0.2	0.2		3.05	1	0.998575	0.999057								6.1	0.895692	0.919403	0.91475
0.05	0.05	0.05	0.05		0.2	0.2	0.2		0.3	0.2	0.2		3.1		0.998575	0.999057								6.2	0.897959	0.925373	0.917456
0.05	0.05	0.05	0.05		0.2	0.2	0.2		0.3	0.2	0.2		3.15		0.998575	0.999057								6.3	0.900227	0.926866	0.918809
0.05	0.05	0.05	0.05		0.2	0.2	0.2		0.3	0.2	0.2		3.2		0.998575	0.999057								6.4	0.900227	0.926866	0.921516
0.05	0.05	0.05	0.05		0.2	0.2	0.2		0.3	0.2	0.2		3.25		0.998575	0.999057								6.5	0.909297	0.929851	0.925575
0.05	0.05	0.05	0.05		0.2	0.2	0.2		0.3	0.2	0.2		3.3		0.998575	0.999057								6.6	0.909297	0.929851	0.926928
0.05	0.05	0.05	0.05		0.2	0.2	0.2		0.3	0.2	0.2		3.35		1	0.999057								6.7	0.909297	0.931343	0.928281
0.05	0.05	0.05	0.05		0.2	0.2	0.2		0.3	0.2	0.2		3.4			0.999057								6.8	0.911565	0.931343	0.932341
0.05	0.05	0.05	0.05		0.2	0.2	0.2		0.3	0.2	0.2		3.45			1								6.9	0.9161	0.931343	0.937754
0.05	0.05	0.05	0.05		0.2	0.2	0.2		0.3	0.2	0.2													7	0.918367	0.932836	0.939107
0.05	0.05	0.05	0.05		0.2	0.2	0.2		0.3	0.2	0.2													7.1	0.922902	0.935821	0.941813
0.05	0.05	0.05	0.05		0.2	0.2	0.2		0.3	0.2	0.2													7.2	0.922902	0.940299	0.943166
0.05	0.05	0.05	0.05		0.2	0.2	0.2		0.3	0.2	0.2													7.3	0.92517	0.941791	0.943166
0.05	0.05	0.05	0.05		0.2	0.2	0.2		0.3	0.2	0.2													7.4	0.927438	0.941791	0.94452
0.05	0.05	0.05	0.05		0.2	0.2	0.2		0.3	0.2	0.2													7.5	0.929705	0.944776	0.945873
0.05	0.05	0.05	0.05		0.2	0.2	0.2		0.3	0.2	0.2													7.6	0.936508	0.947761	0.947226
0.05	0.05	0.05	0.05		0.2	0.2	0.2		0.3	0.2	0.2													7.7	0.936508	0.949254	0.947226
0.05	0.05	0.05	0.05		0.2	0.2	0.2		0.3	0.2	0.2													7.8	0.941043	0.949254	0.949932
0.05	0.05	0.05	0.05		0.2	0.2	0.2		0.3	0.2	0.2													7.9	0.941043	0.949254	0.951286
0.05	0.05	0.05	0.05		0.2	0.2	0.2		0.3	0.2	0.2													8	0.941043	0.949254	0.952639
0.05	0.05	0.05	0.05		0.2	0.2	0.2		0.3	0.2	0.2													8.1	0.943311	0.950746	0.952639
0.05	0.05	0.05	0.05		0.2	0.2	0.2		0.3	0.2	0.2													8.2	0.945578	0.950746	0.953992
0.05	0.05	0.05	0.05		0.2	0.2	0.2		0.3	0.2	0.2													8.3	0.947846	0.950746	0.955345
0.05	0.05	0.05	0.05		0.2	0.2	0.2		0.3	0.2	0.2													8.4	0.947846	0.952239	0.958051
0.05	0.05	0.05	0.05		0.2	0.2	0.2		0.3	0.2	0.2													8.5	0.947846	0.953731	0.958051
0.05	0.05	0.05	0.05		0.2	0.2	0.2		0.3	0.2	0.2													8.6	0.947846	0.953731	0.958051
0.05	0.05	0.05	0.05		0.2	0.2	0.2		0.3	0.2	0.3													8.7	0.947846	0.953731	0.958051
0.05	0.05	0.05	0.05		0.2	0.2	0.2		0.3	0.2	0.3													8.8	0.950113	0.955224	0.959405
0.05	0.05	0.05	0.05		0.2	0.2	0.2		0.3	0.2	0.3													8.9	0.952381	0.956716	0.959405
0.05	0.05	0.05	0.05		0.2	0.2	0.2		0.3	0.2	0.3													9	0.952381	0.958209	0.962111
0.05	0.05	0.05	0.05		0.2	0.2	0.2		0.3	0.2	0.3													9.1	0.954649	0.958209	0.963464
0.05	0.05	0.05	0.05		0.2	0.2	0.2		0.3	0.2	0.3													9.2	0.956916	0.958209	0.963464
0.05	0.05	0.05	0.05		0.2	0.2	0.2		0.3	0.2	0.3													9.3	0.956916	0.958209	0.963464
0.05	0.05	0.05	0.05		0.2	0.2	0.2		0.3	0.2	0.3													9.4	0.956916	0.958209	0.963464
0.05	0.05	0.05	0.05		0.2	0.2	0.2		0.3	0.2	0.3													9.5	0.956916	0.958209	0.963464
0.05	0.05	0.05	0.05		0.2	0.2	0.2		0.3	0.3	0.3													9.6	0.956916	0.958209	0.964817
0.05	0.05	0.05	0.05		0.2	0.2	0.2		0.3	0.3	0.3													9.7	0.956916	0.958209	0.964817
0.05	0.05	0.05	0.05		0.2	0.2	0.2		0.3	0.3	0.3													9.8	0.956916	0.959701	0.964817
0.05	0.05	0.05	0.05		0.2	0.2	0.2		0.3	0.3	0.3													9.9	0.959184	0.962687	0.964817
0.05	0.05	0.05	0.05		0.2	0.2	0.2		0.3	0.3	0.3													10	0.961451	0.965672	0.964817
0.05	0.05	0.05	0.05		0.2	0.2	0.2		0.4	0.3	0.3													10.1	0.961451	0.967164	0.966171
0.05	0.05	0.05	0.05		0.2	0.2	0.2		0.4	0.3	0.3													10.2	0.961451	0.968657	0.967524
0.05	0.05	0.05	0.05		0.2	0.2	0.2		0.4	0.3	0.3													10.3	0.961451	0.970149	0.968877
0.05	0.05	0.05	0.05		0.2	0.2	0.2		0.4	0.3	0.3													10.4	0.961451	0.970149	0.97023
0.05	0.05	0.05	0.05		0.2	0.2	0.2		0.4	0.3	0.3													10.5	0.965986	0.973134	0.971583
0.05	0.05	0.05	0.05		0.2	0.2	0.2		0.4	0.3	0.3													10.6	0.968254	0.973134	0.971583
0.05	0.05	0.05	0.05		0.2	0.2	0.2		0.4	0.3	0.3													10.7	0.968254	0.973134	0.971583
0.05	0.05	0.05	0.05		0.2	0.2	0.2		0.4	0.3	0.3													10.8	0.970522	0.973134	0.971583
0.05	0.05	0.05	0.05		0.2	0.2	0.2		0.4	0.3	0.3													10.9	0.970522	0.974627	0.97429
0.05	0.05	0.05	0.05		0.2	0.2	0.2		0.4	0.3	0.3													11	0.970522	0.976119	0.975643
0.05	0.05	0.05	0.05		0.2	0.2	0.2		0.4	0.3	0.3													11.1	0.972789	0.976119	0.975643
0.05	0.05	0.05	0.05		0.2	0.2	0.2		0.4	0.3	0.3													11.2	0.972789	0.976119	0.975643
0.05	0.05	0.05	0.05		0.2	0.2	0.2		0.4	0.3	0.3													11.3	0.972789	0.976119	0.975643
0.05	0.05	0.05	0.05		0.2	0.2	0.2		0.4	0.3	0.3													11.4	0.972789	0.976119	0.978349
0.05	0.05	0.05	0.05		0.2	0.2	0.2		0.4	0.3	0.3													11.5	0.972789	0.977612	0.978349
0.05	0.05	0.05	0.05		0.2	0.2	0.2		0.4	0.3	0.3													11.6	0.972789	0.979104	0.978349
0.05	0.05	0.05	0.05		0.2	0.2	0.2		0.4	0.3	0.3													11.7	0.972789	0.979104	0.978349
0.05	0.05	0.05	0.05		0.2	0.2	0.2		0.4	0.3	0.3													11.8	0.972789	0.979104	0.979702
0.05	0.05	0.05	0.05		0.2	0.2	0.2		0.4	0.3	0.3													11.9	0.972789	0.979104	0.981055
0.05	0.05	0.05	0.05		0.2	0.2	0.2		0.4	0.3	0.3													12	0.975057	0.979104	0.982409
0.05	0.05	0.05	0.05		0.2	0.2	0.2		0.4	0.3	0.3													12.1	0.975057	0.979104	0.982409
0.05	0.05	0.05	0.05		0.2	0.2	0.2		0.4	0.3	0.3													12.2	0.975057	0.979104	0.982409
0.05	0.05	0.05	0.05		0.2	0.2	0.2		0.4	0.3	0.3													12.3	0.975057	0.979104	0.982409
0.05	0.05	0.05	0.05		0.2	0.2	0.2		0.4	0.3	0.3													12.4	0.977324	0.980597	0.982409
0.05	0.05	0.05	0.05		0.2	0.2	0.2		0.4	0.3	0.3													12.5	0.977324	0.980597	0.982409
0.05	0.05	0.05	0.05		0.2	0.2	0.2		0.4	0.3	0.3													12.6	0.977324	0.980597	0.983762
0.05	0.05	0.05	0.05		0.2	0.2	0.2		0.5	0.3	0.3													12.7	0.979592	0.980597	0.985115
0.05	0.05	0.05	0.05		0.2	0.2	0.2		0.5	0.3	0.3													12.8	0.979592	0.980597	0.986468
0.05	0.05	0.05	0.05		0.2	0.2	0.2		0.5	0.3	0.3													12.9	0.979592	0.980597	0.986468
0.05	0.05	0.05	0.05		0.2	0.2	0.2		0.5	0.3	0.3													13	0.979592	0.98209	0.986468
0.05	0.05	0.05	0.05		0.2	0.2	0.2		0.5	0.3	0.3													13.1	0.979592	0.98209	0.987821
0.05	0.05	0.05	0.05		0.2	0.2	0.2		0.5	0.3	0.3													13.2	0.979592	0.98209	0.987821
0.05	0.05	0.05	0.05		0.2	0.2	0.2		0.5	0.3	0.3													13.3	0.979592	0.98209	0.987821
0.05	0.05	0.05	0.05		0.2	0.2	0.2		0.5	0.3	0.3													13.4	0.979592	0.983582	0.987821
0.05	0.05	0.05	0.05		0.2	0.2	0.2		0.5	0.3	0.3													13.5	0.979592	0.983582	0.987821
0.05	0.05	0.05	0.05		0.2	0.2	0.2		0.5	0.3	0.3													13.6	0.979592	0.983582	0.989175
0.05	0.05	0.05	0.05		0.2	0.2	0.2		0.5	0.3	0.3													13.7	0.979592	0.983582	0.989175
0.05	0.05	0.05	0.05		0.2	0.2	0.2		0.5	0.3	0.4													13.8	0.981859	0.983582	0.989175
0.05	0.05	0.05	0.05		0.2	0.3	0.2		0.5	0.3	0.4													13.9	0.981859	0.983582	0.989175
0.05	0.05	0.05	0.05		0.2	0.3	0.2		0.5	0.3	0.4													14	0.981859	0.983582	0.989175
0.05	0.05	0.05	0.05		0.2	0.3	0.2		0.6	0.3	0.4													14.1	0.981859	0.983582	0.989175
0.05	0.05	0.05	0.05		0.2	0.3	0.2		0.6	0.3	0.4													14.2	0.981859	0.983582	0.989175
0.05	0.05	0.05	0.05		0.2	0.3	0.2		0.6	0.3	0.4													14.3	0.981859	0.983582	0.989175
0.05	0.05	0.05	0.05		0.2	0.3	0.2		0.6	0.4	0.4													14.4	0.981859	0.983582	0.990528
0.05	0.05	0.05	0.05		0.2	0.3	0.2		0.6	0.4	0.4													14.5	0.981859	0.985075	0.990528
0.05	0.05	0.05	0.05		0.2	0.3	0.2		0.6	0.4	0.4													14.6	0.981859	0.986567	0.990528
0.05	0.05	0.05	0.05		0.2	0.3	0.2		0.6	0.4	0.4													14.7	0.981859	0.98806	0.991881
0.05	0.05	0.05	0.05		0.2	0.3	0.2		0.6	0.4	0.4													14.8	0.981859	0.98806	0.991881
0.05	0.05	0.05	0.05		0.2	0.3	0.2		0.6	0.4	0.4													14.9	0.981859	0.98806	0.991881
0.05	0.05	0.05	0.05		0.2	0.3	0.2		0.6	0.4	0.4													15	0.981859	0.98806	0.991881
0.05	0.05	0.05	0.05		0.2	0.3	0.2		0.6	0.4	0.4													15.1	0.981859	0.98806	0.991881
0.05	0.05	0.05	0.05		0.2	0.3	0.2		0.6	0.4	0.4													15.2	0.981859	0.989552	0.991881
0.05	0.05	0.05	0.05		0.2	0.3	0.2		0.6	0.4	0.4													15.3	0.981859	0.991045	0.991881
0.05	0.05	0.05	0.05		0.2	0.3	0.2		0.6	0.4	0.4													15.4	0.981859	0.991045	0.991881
0.05	0.05	0.05	0.05		0.2	0.3	0.2		0.6	0.4	0.4													15.5	0.981859	0.991045	0.991881
0.05	0.05	0.05	0.05		0.2	0.3	0.2		0.7	0.4	0.4													15.6	0.981859	0.992537	0.991881
0.05	0.05	0.05	0.05		0.2	0.3	0.2		0.7	0.4	0.4													15.7	0.981859	0.992537	0.991881
0.05	0.05	0.05	0.05		0.2	0.3	0.2		0.7	0.4	0.4													15.8	0.981859	0.992537	0.993234
0.05	0.05	0.05	0.05		0.2	0.3	0.2		0.7	0.4	0.4													15.9	0.981859	0.992537	0.993234
0.05	0.05	0.05	0.05		0.2	0.3	0.2		0.7	0.4	0.4													16	0.984127	0.992537	0.993234
0.05	0.05	0.05	0.05		0.2	0.3	0.2		0.7	0.4	0.4													16.1	0.984127	0.992537	0.993234
0.05	0.05	0.05	0.05		0.2	0.3	0.2		0.7	0.4	0.4													16.2	0.984127	0.992537	0.993234
0.05	0.05	0.05	0.05		0.2	0.3	0.2		0.7	0.4	0.4													16.3	0.984127	0.992537	0.993234
0.05	0.05	0.05	0.05		0.2	0.3	0.2		0.7	0.4	0.4													16.4	0.986395	0.992537	0.993234
0.05	0.05	0.05	0.05		0.2	0.3	0.2		0.7	0.4	0.4													16.5	0.986395	0.992537	0.993234
0.05	0.05	0.05	0.05		0.2	0.3	0.2		0.7	0.4	0.4													16.6	0.986395	0.992537	0.994587
0.05	0.05	0.05	0.05		0.2	0.3	0.2		0.7	0.4	0.4													16.7	0.986395	0.992537	0.994587
0.05	0.05	0.05	0.05		0.2	0.3	0.2		0.7	0.4	0.4													16.8	0.986395	0.992537	0.994587
0.05	0.05	0.05	0.05		0.2	0.3	0.2		0.7	0.4	0.4													16.9	0.986395	0.992537	0.99594
0.05	0.05	0.05	0.05		0.2	0.3	0.2		0.7	0.4	0.4													17	0.986395	0.992537	0.99594
0.05	0.05	0.05	0.05		0.2	0.3	0.3		0.8	0.4	0.4													17.1	0.986395	0.992537	0.99594
0.05	0.05	0.05	0.05		0.2	0.3	0.3		0.8	0.4	0.4													17.2	0.986395	0.992537	0.99594
0.05	0.05	0.05	0.05		0.2	0.3	0.3		0.8	0.4	0.4													17.3	0.988662	0.99403	0.99594
0.05	0.05	0.05	0.05		0.2	0.3	0.3		0.8	0.4	0.4													17.4	0.988662	0.99403	0.99594
0.05	0.05	0.05	0.05		0.2	0.3	0.3		0.8	0.4	0.4													17.5	0.988662	0.99403	0.99594
0.05	0.05	0.05	0.05		0.2	0.3	0.3		0.8	0.4	0.4													17.6	0.99093	0.99403	0.99594
0.05	0.05	0.05	0.05		0.2	0.3	0.3		0.8	0.4	0.4													17.7	0.99093	0.99403	0.99594
0.05	0.05	0.05	0.05		0.2	0.3	0.3		0.8	0.4	0.4													17.8	0.99093	0.99403	0.99594
0.05	0.05	0.05	0.05		0.2	0.3	0.3		0.8	0.4	0.4													17.9	0.99093	0.99403	0.99594
0.05	0.05	0.05	0.05		0.2	0.3	0.3		0.8	0.4	0.4													18	0.99093	0.99403	0.99594
0.05	0.05	0.05	0.05		0.2	0.3	0.3		0.8	0.4	0.4													18.1	0.99093	0.99403	0.997294
0.05	0.05	0.05	0.05		0.2	0.3	0.3		0.9	0.4	0.4													18.2	0.99093	0.995522	0.998647
0.05	0.05	0.05	0.05		0.2	0.3	0.3		0.9	0.4	0.4													18.3	0.99093	0.995522	0.998647
0.05	0.05	0.05	0.05		0.2	0.3	0.3		0.9	0.4	0.5													18.4	0.99093	0.995522	0.998647
0.05	0.05	0.05	0.05		0.2	0.3	0.3		0.9	0.4	0.5													18.5	0.99093	0.995522	0.998647
0.05	0.05	0.05	0.05		0.2	0.3	0.3		0.9	0.4	0.5													18.6	0.993197	0.995522	0.998647
0.05	0.05	0.05	0.05		0.2	0.3	0.3		0.9	0.4	0.5													18.7	0.993197	0.995522	1
0.05	0.05	0.05	0.05		0.2	0.3	0.3		0.9	0.4	0.5													18.8	0.993197	0.995522
0.05	0.05	0.05	0.05		0.2	0.3	0.3		0.9	0.4	0.5													18.9	0.993197	0.995522
0.05	0.05	0.05	0.05		0.2	0.3	0.3		0.9	0.4	0.5													19	0.993197	0.995522
0.05	0.05	0.05	0.05		0.2	0.3	0.3		0.9	0.4	0.5													19.1	0.995465	0.997015
0.05	0.05	0.05	0.05		0.2	0.3	0.3		0.9	0.4	0.5													19.2	0.995465	0.997015
0.05	0.05	0.05	0.05		0.2	0.3	0.3		0.9	0.4	0.5													19.3	0.995465	0.997015
0.05	0.05	0.05	0.05		0.2	0.3	0.3		0.9	0.4	0.5													19.4	0.997732	0.997015
0.05	0.05	0.05	0.05		0.2	0.3	0.3		0.9	0.4	0.5													19.5	0.997732	0.997015
0.05	0.05	0.05	0.05		0.2	0.3	0.3		0.9	0.5	0.5													19.6	0.997732	0.998507
0.05	0.05	0.05	0.05		0.2	0.3	0.3		0.9	0.5	0.5													19.7	0.997732	0.998507
0.05	0.05	0.05	0.05		0.2	0.3	0.3		0.9	0.5	0.5													19.8	0.997732	0.998507
0.05	0.05	0.05	0.05		0.2	0.3	0.3		0.9	0.5	0.5													19.9	0.997732	0.998507
0.05	0.05	0.05	0.05		0.2	0.3	0.3		1	0.5	0.5													20	1	0.998507
0.05	0.05	0.05	0.05		0.2	0.3	0.3		1	0.5	0.5													20.1		1
0.05	0.05	0.05	0.05		0.2	0.3	0.3		1	0.5	0.5
0.05	0.05	0.05	0.05		0.2	0.3	0.3		1	0.5	0.5
0.05	0.05	0.05	0.05		0.2	0.3	0.3		1	0.5	0.5
0.05	0.05	0.05	0.05		0.3	0.3	0.3		1	0.5	0.5
0.05	0.05	0.05	0.05		0.3	0.3	0.3		1	0.5	0.5
0.05	0.05	0.05	0.05		0.3	0.3	0.3		1	0.5	0.5
0.05	0.05	0.05	0.05		0.3	0.3	0.3		1	0.5	0.5
0.05	0.05	0.05	0.05		0.3	0.3	0.3		1	0.5	0.5
0.05	0.05	0.05	0.05		0.3	0.3	0.3		1	0.5	0.5
0.05	0.05	0.05	0.05		0.3	0.3	0.3		1	0.5	0.5
0.05	0.05	0.05	0.05		0.3	0.3	0.3		1	0.5	0.5
0.05	0.05	0.05	0.05		0.3	0.3	0.3		1	0.5	0.5
0.05	0.05	0.05	0.05		0.3	0.3	0.3		1	0.5	0.5
0.05	0.05	0.05	0.05		0.3	0.3	0.3		1	0.5	0.5
0.05	0.05	0.05	0.05		0.3	0.3	0.3		1.1	0.5	0.5
0.05	0.05	0.05	0.05		0.3	0.3	0.3		1.1	0.5	0.5
0.05	0.05	0.05	0.05		0.3	0.3	0.3		1.1	0.5	0.5
0.05	0.05	0.05	0.05		0.3	0.3	0.3		1.1	0.5	0.5
0.05	0.05	0.05	0.05		0.3	0.3	0.3		1.1	0.5	0.5
0.05	0.05	0.05	0.05		0.3	0.3	0.3		1.1	0.6	0.5
0.05	0.05	0.05	0.05		0.3	0.3	0.3		1.1	0.6	0.6
0.05	0.05	0.05	0.05		0.3	0.3	0.3		1.1	0.6	0.6
0.05	0.05	0.05	0.05		0.3	0.3	0.3		1.2	0.6	0.6
0.05	0.05	0.05	0.05		0.3	0.3	0.3		1.2	0.6	0.6
0.05	0.05	0.05	0.05		0.3	0.3	0.3		1.2	0.6	0.6
0.05	0.05	0.05	0.05		0.3	0.3	0.3		1.2	0.6	0.6
0.05	0.05	0.05	0.05		0.3	0.3	0.3		1.2	0.6	0.6
0.05	0.05	0.05	0.05		0.3	0.3	0.3		1.2	0.6	0.6
0.05	0.05	0.05	0.05		0.3	0.3	0.3		1.2	0.6	0.6
0.05	0.05	0.05	0.05		0.3	0.3	0.3		1.2	0.6	0.6
0.05	0.05	0.05	0.05		0.3	0.3	0.3		1.2	0.6	0.6
0.05	0.05	0.05	0.05		0.3	0.3	0.3		1.2	0.6	0.6
0.05	0.05	0.05	0.05		0.3	0.3	0.3		1.2	0.6	0.6
0.05	0.05	0.05	0.05		0.3	0.3	0.3		1.2	0.6	0.6
0.05	0.05	0.05	0.05		0.3	0.3	0.3		1.2	0.6	0.6
0.05	0.05	0.05	0.05		0.3	0.3	0.3		1.3	0.6	0.6
0.05	0.05	0.05	0.05		0.3	0.3	0.3		1.3	0.6	0.6
0.05	0.05	0.05	0.05		0.3	0.3	0.3		1.3	0.6	0.6
0.05	0.05	0.05	0.05		0.3	0.3	0.3		1.3	0.6	0.6
0.05	0.05	0.05	0.05		0.3	0.4	0.3		1.3	0.6	0.6
0.05	0.05	0.05	0.05		0.3	0.4	0.3		1.3	0.6	0.6
0.05	0.05	0.05	0.05		0.3	0.4	0.3		1.3	0.6	0.6
0.05	0.05	0.05	0.05		0.3	0.4	0.3		1.3	0.6	0.6
0.05	0.05	0.05	0.05		0.3	0.4	0.3		1.4	0.6	0.6
0.05	0.05	0.05	0.05		0.3	0.4	0.3		1.4	0.6	0.7
0.05	0.05	0.05	0.05		0.3	0.4	0.3		1.4	0.6	0.7
0.05	0.05	0.05	0.05		0.3	0.4	0.3		1.4	0.6	0.7
0.05	0.05	0.05	0.05		0.3	0.4	0.3		1.4	0.6	0.7
0.05	0.05	0.05	0.05		0.3	0.4	0.3		1.4	0.6	0.7
0.05	0.05	0.05	0.05		0.3	0.4	0.3		1.4	0.6	0.7
0.05	0.05	0.05	0.05		0.3	0.4	0.3		1.4	0.6	0.7
0.05	0.05	0.05	0.05		0.3	0.4	0.3		1.4	0.6	0.7
0.05	0.05	0.05	0.05		0.3	0.4	0.3		1.5	0.6	0.7
0.05	0.05	0.05	0.05		0.3	0.4	0.3		1.5	0.6	0.7
0.05	0.05	0.05	0.05		0.3	0.4	0.3		1.5	0.6	0.7
0.05	0.05	0.05	0.05		0.3	0.4	0.3		1.5	0.6	0.7
0.05	0.05	0.05	0.05		0.3	0.4	0.3		1.5	0.7	0.7
0.05	0.05	0.05	0.05		0.3	0.4	0.3		1.5	0.7	0.7
0.05	0.05	0.05	0.05		0.3	0.4	0.3		1.5	0.7	0.7
0.05	0.05	0.05	0.05		0.3	0.4	0.3		1.5	0.7	0.7
0.05	0.05	0.05	0.05		0.3	0.4	0.3		1.5	0.7	0.7
0.05	0.05	0.05	0.05		0.3	0.4	0.3		1.5	0.7	0.7
0.05	0.05	0.05	0.05		0.3	0.4	0.3		1.5	0.7	0.7
0.05	0.05	0.05	0.05		0.3	0.4	0.3		1.5	0.7	0.7
0.05	0.05	0.05	0.05		0.3	0.4	0.3		1.5	0.7	0.7
0.05	0.05	0.05	0.05		0.3	0.4	0.3		1.6	0.7	0.7
0.05	0.05	0.05	0.05		0.3	0.4	0.3		1.6	0.7	0.7
0.05	0.05	0.05	0.05		0.3	0.4	0.3		1.6	0.7	0.7
0.05	0.05	0.05	0.05		0.3	0.4	0.3		1.6	0.7	0.7
0.05	0.05	0.05	0.05		0.3	0.4	0.3		1.6	0.7	0.7
0.05	0.05	0.05	0.05		0.3	0.4	0.3		1.7	0.7	0.7
0.05	0.05	0.05	0.05		0.3	0.4	0.3		1.7	0.7	0.7
0.05	0.05	0.05	0.05		0.3	0.4	0.3		1.7	0.7	0.7
0.05	0.05	0.05	0.05		0.3	0.4	0.3		1.7	0.7	0.7
0.05	0.05	0.05	0.05		0.3	0.4	0.3		1.7	0.7	0.7
0.05	0.05	0.05	0.05		0.3	0.4	0.3		1.7	0.7	0.7
0.05	0.05	0.05	0.05		0.3	0.4	0.3		1.7	0.7	0.7
0.05	0.05	0.05	0.05		0.3	0.4	0.3		1.7	0.7	0.7
0.05	0.05	0.05	0.05		0.3	0.4	0.3		1.7	0.7	0.8
0.05	0.05	0.05	0.05		0.3	0.4	0.3		1.8	0.7	0.8
0.05	0.05	0.05	0.05		0.3	0.4	0.3		1.8	0.7	0.8
0.05	0.05	0.05	0.05		0.3	0.4	0.4		1.8	0.7	0.8
0.05	0.05	0.05	0.05		0.3	0.4	0.4		1.8	0.7	0.8
0.05	0.05	0.05	0.05		0.3	0.4	0.4		1.8	0.7	0.8
0.05	0.05	0.05	0.05		0.3	0.4	0.4		1.8	0.7	0.8
0.05	0.05	0.05	0.05		0.3	0.4	0.4		1.8	0.7	0.8
0.05	0.05	0.05	0.05		0.3	0.4	0.4		1.9	0.7	0.8
0.05	0.05	0.05	0.05		0.3	0.4	0.4		1.9	0.7	0.8
0.05	0.05	0.05	0.05		0.3	0.4	0.4		1.9	0.7	0.8
0.05	0.05	0.05	0.05		0.3	0.4	0.4		1.9	0.7	0.8
0.05	0.05	0.05	0.05		0.3	0.4	0.4		1.9	0.7	0.8
0.05	0.05	0.05	0.05		0.3	0.4	0.4		2	0.7	0.8
0.05	0.05	0.05	0.05		0.3	0.4	0.4		2	0.7	0.8
0.05	0.05	0.05	0.05		0.3	0.4	0.4		2.1	0.7	0.8
0.05	0.05	0.05	0.05		0.3	0.4	0.4		2.1	0.8	0.8
0.05	0.05	0.05	0.05		0.3	0.4	0.4		2.1	0.8	0.8
0.05	0.05	0.05	0.05		0.3	0.4	0.4		2.1	0.8	0.8
0.05	0.05	0.05	0.05		0.3	0.4	0.4		2.1	0.8	0.8
0.05	0.05	0.05	0.05		0.3	0.4	0.4		2.1	0.8	0.8
0.05	0.05	0.05	0.05		0.3	0.4	0.4		2.1	0.8	0.8
0.05	0.05	0.05	0.05		0.3	0.4	0.4		2.1	0.8	0.8
0.05	0.05	0.05	0.05		0.3	0.4	0.4		2.2	0.8	0.8
0.05	0.05	0.05	0.05		0.3	0.4	0.4		2.2	0.8	0.8
0.05	0.05	0.05	0.05		0.3	0.4	0.4		2.2	0.8	0.8
0.05	0.05	0.05	0.05		0.3	0.4	0.4		2.2	0.8	0.8
0.05	0.05	0.05	0.05		0.3	0.4	0.4		2.2	0.8	0.8
0.05	0.05	0.05	0.05		0.3	0.4	0.4		2.3	0.8	0.9
0.05	0.05	0.05	0.05		0.3	0.4	0.4		2.3	0.8	0.9
0.05	0.05	0.05	0.05		0.3	0.4	0.4		2.3	0.8	0.9
0.05	0.05	0.05	0.05		0.3	0.4	0.4		2.3	0.8	0.9
0.05	0.05	0.05	0.05		0.3	0.4	0.4		2.3	0.8	0.9
0.05	0.05	0.05	0.05		0.3	0.4	0.4		2.3	0.8	0.9
0.05	0.05	0.05	0.05		0.3	0.4	0.4		2.4	0.8	0.9
0.05	0.05	0.05	0.05		0.3	0.4	0.4		2.4	0.8	0.9
0.05	0.05	0.05	0.05		0.3	0.4	0.4		2.4	0.8	0.9
0.05	0.05	0.05	0.05		0.3	0.4	0.4		2.5	0.8	0.9
0.05	0.05	0.05	0.05		0.3	0.4	0.4		2.5	0.8	0.9
0.05	0.05	0.05	0.05		0.3	0.4	0.4		2.5	0.8	0.9
0.05	0.05	0.05	0.05		0.3	0.4	0.4		2.5	0.8	0.9
0.05	0.05	0.05	0.05		0.3	0.4	0.4		2.6	0.9	0.9
0.05	0.05	0.05	0.05		0.3	0.4	0.4		2.6	0.9	0.9
0.05	0.05	0.05	0.05		0.3	0.4	0.4		2.6	0.9	0.9
0.05	0.05	0.05	0.05		0.3	0.4	0.4		2.6	0.9	0.9
0.05	0.05	0.05	0.05		0.3	0.4	0.4		2.6	0.9	0.9
0.05	0.05	0.05	0.05		0.3	0.4	0.4		2.6	0.9	0.9
0.05	0.1	0.05	0.05		0.3	0.4	0.4		2.6	0.9	0.9
0.05	0.1	0.05	0.05		0.3	0.4	0.4		2.6	0.9	0.9
0.05	0.1	0.05	0.05		0.3	0.4	0.4		2.7	0.9	1
0.05	0.1	0.05	0.05		0.3	0.4	0.4		2.7	0.9	1
0.05	0.1	0.05	0.05		0.3	0.5	0.4		2.7	0.9	1
0.05	0.1	0.05	0.05		0.3	0.5	0.4		2.7	0.9	1
0.05	0.1	0.05	0.05		0.3	0.5	0.4		2.8	0.9	1
0.05	0.1	0.05	0.05		0.3	0.5	0.4		2.8	0.9	1
0.05	0.1	0.05	0.05		0.3	0.5	0.4		2.8	0.9	1
0.05	0.1	0.05	0.05		0.3	0.5	0.4		2.8	0.9	1
0.05	0.1	0.05	0.05		0.3	0.5	0.4		2.8	0.9	1
0.05	0.1	0.05	0.05		0.3	0.5	0.4		2.8	0.9	1
0.05	0.1	0.05	0.05		0.3	0.5	0.4		2.9	0.9	1
0.05	0.1	0.05	0.05		0.3	0.5	0.4		2.9	0.9	1
0.05	0.1	0.05	0.05		0.3	0.5	0.4		3	0.9	1
0.05	0.1	0.05	0.05		0.4	0.5	0.4		3	0.9	1
0.05	0.1	0.05	0.05		0.4	0.5	0.4		3	0.9	1
0.05	0.1	0.05	0.05		0.4	0.5	0.4		3	0.9	1
0.05	0.1	0.05	0.05		0.4	0.5	0.4		3	1	1
0.05	0.1	0.05	0.05		0.4	0.5	0.4		3	1	1
0.05	0.1	0.05	0.05		0.4	0.5	0.4		3.1	1	1.1
0.05	0.1	0.05	0.05		0.4	0.5	0.4		3.1	1	1.1
0.05	0.1	0.05	0.05		0.4	0.5	0.4		3.2	1	1.1
0.05	0.1	0.05	0.05		0.4	0.5	0.4		3.2	1	1.1
0.05	0.1	0.05	0.05		0.4	0.5	0.4		3.2	1	1.1
0.05	0.1	0.05	0.05		0.4	0.5	0.4		3.2	1	1.1
0.05	0.1	0.05	0.05		0.4	0.5	0.4		3.3	1	1.1
0.05	0.1	0.05	0.05		0.4	0.5	0.4		3.3	1	1.1
0.05	0.1	0.05	0.05		0.4	0.5	0.4		3.3	1	1.1
0.05	0.1	0.05	0.05		0.4	0.5	0.4		3.4	1	1.1
0.05	0.1	0.05	0.05		0.4	0.5	0.4		3.4	1	1.1
0.05	0.1	0.05	0.05		0.4	0.5	0.4		3.5	1	1.1
0.05	0.1	0.05	0.05		0.4	0.5	0.4		3.5	1	1.1
0.05	0.1	0.05	0.05		0.4	0.5	0.4		3.5	1.1	1.1
0.05	0.1	0.05	0.05		0.4	0.5	0.4		3.7	1.1	1.1
0.05	0.1	0.05	0.05		0.4	0.5	0.4		3.7	1.1	1.1
0.05	0.1	0.05	0.05		0.4	0.5	0.4		3.8	1.1	1.1
0.05	0.1	0.05	0.05		0.4	0.5	0.4		3.8	1.1	1.1
0.05	0.1	0.05	0.05		0.4	0.5	0.4		3.8	1.1	1.1
0.05	0.1	0.05	0.05		0.4	0.5	0.4		3.9	1.1	1.1
0.05	0.1	0.05	0.05		0.4	0.5	0.4		3.9	1.1	1.1
0.05	0.1	0.05	0.05		0.4	0.5	0.4		3.9	1.1	1.2
0.05	0.1	0.05	0.05		0.4	0.5	0.4		3.9	1.1	1.2
0.05	0.1	0.05	0.05		0.4	0.5	0.4		4	1.1	1.2
0.05	0.1	0.05	0.05		0.4	0.5	0.4		4.1	1.1	1.2
0.05	0.1	0.05	0.05		0.4	0.5	0.4		4.1	1.1	1.2
0.05	0.1	0.05	0.05		0.4	0.5	0.4		4.1	1.1	1.2
0.05	0.1	0.05	0.05		0.4	0.5	0.4		4.1	1.2	1.2
0.05	0.1	0.05	0.05		0.4	0.5	0.4		4.3	1.2	1.2
0.05	0.1	0.05	0.05		0.4	0.5	0.5		4.4	1.2	1.2
0.05	0.1	0.05	0.05		0.4	0.5	0.5		4.5	1.2	1.2
0.05	0.1	0.05	0.05		0.4	0.5	0.5		4.7	1.2	1.2
0.05	0.1	0.05	0.05		0.4	0.5	0.5		4.7	1.2	1.2
0.05	0.1	0.05	0.05		0.4	0.5	0.5		4.9	1.2	1.2
0.05	0.1	0.05	0.05		0.4	0.5	0.5		5.1	1.2	1.2
0.05	0.1	0.05	0.05		0.4	0.5	0.5		5.1	1.2	1.2
0.1	0.1	0.05	0.05		0.4	0.5	0.5		5.2	1.2	1.2
0.1	0.1	0.05	0.05		0.4	0.5	0.5		5.3	1.2	1.2
0.1	0.1	0.05	0.05		0.4	0.5	0.5		5.3	1.2	1.2
0.1	0.1	0.05	0.05		0.4	0.5	0.5		5.3	1.2	1.2
0.1	0.1	0.05	0.05		0.4	0.5	0.5		5.4	1.2	1.2
0.1	0.1	0.05	0.05		0.4	0.5	0.5		5.4	1.2	1.2
0.1	0.1	0.05	0.05		0.4	0.5	0.5		5.6	1.2	1.2
0.1	0.1	0.05	0.05		0.4	0.5	0.5		5.9	1.2	1.3
0.1	0.1	0.05	0.05		0.4	0.5	0.5		6	1.2	1.3
0.1	0.1	0.05	0.05		0.4	0.5	0.5		6	1.3	1.3
0.1	0.1	0.05	0.05		0.4	0.5	0.5		6	1.3	1.3
0.1	0.1	0.05	0.05		0.4	0.5	0.5		6.1	1.3	1.3
0.1	0.1	0.05	0.05		0.4	0.5	0.5		6.2	1.3	1.3
0.1	0.1	0.05	0.05		0.4	0.5	0.5		6.3	1.3	1.3
0.1	0.1	0.05	0.05		0.4	0.5	0.5		6.5	1.3	1.3
0.1	0.1	0.05	0.05		0.4	0.5	0.5		6.5	1.4	1.3
0.1	0.1	0.05	0.05		0.4	0.5	0.5		6.5	1.4	1.3
0.1	0.1	0.05	0.05		0.4	0.5	0.5		6.5	1.4	1.3
0.1	0.1	0.05	0.05		0.4	0.5	0.5		6.8	1.4	1.3
0.1	0.1	0.05	0.05		0.4	0.5	0.5		6.9	1.4	1.3
0.1	0.1	0.05	0.05		0.4	0.5	0.5		6.9	1.4	1.3
0.1	0.1	0.05	0.05		0.4	0.5	0.5		7	1.4	1.4
0.1	0.1	0.05	0.05		0.4	0.5	0.5		7.1	1.4	1.4
0.1	0.1	0.05	0.05		0.4	0.6	0.5		7.1	1.4	1.4
0.1	0.1	0.05	0.05		0.4	0.6	0.5		7.3	1.4	1.4
0.1	0.1	0.05	0.05		0.4	0.6	0.5		7.4	1.4	1.4
0.1	0.1	0.05	0.05		0.4	0.6	0.5		7.5	1.4	1.4
0.1	0.1	0.05	0.05		0.4	0.6	0.5		7.6	1.4	1.4
0.1	0.1	0.05	0.05		0.4	0.6	0.5		7.6	1.4	1.4
0.1	0.1	0.05	0.05		0.4	0.6	0.5		7.6	1.5	1.4
0.1	0.1	0.05	0.05		0.4	0.6	0.5		7.8	1.5	1.4
0.1	0.1	0.05	0.05		0.4	0.6	0.5		7.8	1.5	1.4
0.1	0.1	0.05	0.05		0.4	0.6	0.5		8.1	1.5	1.4
0.1	0.1	0.05	0.05		0.4	0.6	0.5		8.2	1.5	1.4
0.1	0.1	0.05	0.05		0.4	0.6	0.5		8.3	1.5	1.4
0.1	0.1	0.05	0.05		0.4	0.6	0.5		8.8	1.5	1.4
0.1	0.1	0.05	0.05		0.4	0.6	0.5		8.9	1.5	1.5
0.1	0.1	0.05	0.05		0.4	0.6	0.5		9.1	1.5	1.5
0.1	0.1	0.05	0.05		0.4	0.6	0.5		9.2	1.5	1.5
0.1	0.1	0.05	0.05		0.4	0.6	0.5		9.9	1.5	1.5
0.1	0.1	0.05	0.05		0.4	0.6	0.5		10	1.5	1.5
0.1	0.1	0.05	0.05		0.4	0.6	0.5		10.5	1.5	1.5
0.1	0.1	0.05	0.05		0.4	0.6	0.5		10.5	1.6	1.5
0.1	0.1	0.05	0.05		0.4	0.6	0.5		10.6	1.6	1.5
0.1	0.1	0.05	0.05		0.4	0.6	0.5		10.8	1.6	1.5
0.1	0.1	0.05	0.05		0.4	0.6	0.5		11.1	1.6	1.5
0.1	0.1	0.05	0.05		0.4	0.6	0.6		12	1.6	1.5
0.1	0.1	0.05	0.05		0.4	0.6	0.6		12.4	1.6	1.5
0.1	0.1	0.05	0.05		0.4	0.6	0.6		12.7	1.7	1.5
0.1	0.1	0.05	0.05		0.4	0.6	0.6		13.8	1.7	1.5
0.1	0.1	0.05	0.05		0.4	0.6	0.6		16	1.7	1.5
0.1	0.1	0.05	0.05		0.4	0.6	0.6		16.4	1.7	1.5
0.1	0.1	0.05	0.05		0.4	0.6	0.6		17.3	1.7	1.6
0.1	0.1	0.05	0.05		0.4	0.6	0.6		17.6	1.7	1.6
0.1	0.1	0.05	0.05		0.4	0.6	0.6		18.6	1.7	1.6
0.1	0.1	0.05	0.05		0.4	0.6	0.6		19.1	1.7	1.6
0.1	0.1	0.05	0.05		0.4	0.6	0.6		19.4	1.8	1.6
0.1	0.1	0.05	0.05		0.4	0.6	0.6		20	1.8	1.6
0.1	0.1	0.05	0.05		0.4	0.6	0.6			1.8	1.6
0.1	0.1	0.05	0.05		0.4	0.6	0.6			1.8	1.6
0.1	0.1	0.05	0.05		0.4	0.6	0.6			1.8	1.6
0.1	0.1	0.05	0.05		0.4	0.6	0.6			1.8	1.6
0.1	0.1	0.05	0.05		0.4	0.6	0.6			1.8	1.6
0.1	0.1	0.05	0.05		0.4	0.6	0.6			1.8	1.6
0.1	0.1	0.05	0.05		0.5	0.6	0.6			1.8	1.6
0.1	0.1	0.05	0.05		0.5	0.6	0.6			1.9	1.6
0.1	0.1	0.05	0.05		0.5	0.6	0.6			1.9	1.6
0.1	0.1	0.05	0.05		0.5	0.6	0.6			1.9	1.6
0.1	0.1	0.05	0.05		0.5	0.6	0.6			1.9	1.6
0.1	0.1	0.05	0.05		0.5	0.6	0.6			1.9	1.7
0.1	0.1	0.05	0.05		0.5	0.6	0.6			1.9	1.7
0.1	0.1	0.05	0.05		0.5	0.6	0.6			1.9	1.7
0.1	0.1	0.05	0.05		0.5	0.6	0.6			1.9	1.7
0.1	0.1	0.05	0.05		0.5	0.6	0.6			2	1.7
0.1	0.1	0.05	0.05		0.5	0.6	0.6			2	1.7
0.1	0.1	0.05	0.05		0.5	0.6	0.6			2	1.7
0.1	0.15	0.05	0.05		0.5	0.6	0.6			2	1.7
0.1	0.15	0.05	0.05		0.5	0.6	0.6			2	1.8
0.1	0.15	0.05	0.05		0.5	0.6	0.6			2	1.8
0.1	0.15	0.05	0.05		0.5	0.6	0.6			2	1.8
0.1	0.15	0.05	0.05		0.5	0.6	0.6			2	1.8
0.1	0.15	0.05	0.05		0.5	0.6	0.6			2	1.8
0.1	0.15	0.05	0.05		0.5	0.6	0.6			2	1.8
0.1	0.15	0.05	0.05		0.5	0.6	0.6			2	1.8
0.1	0.15	0.05	0.05		0.5	0.6	0.6			2.1	1.8
0.1	0.15	0.05	0.05		0.5	0.6	0.6			2.1	1.8
0.1	0.15	0.05	0.05		0.5	0.7	0.6			2.1	1.8
0.1	0.15	0.05	0.05		0.5	0.7	0.6			2.1	1.9
0.1	0.15	0.05	0.05		0.5	0.7	0.6			2.1	1.9
0.1	0.15	0.05	0.05		0.5	0.7	0.6			2.1	1.9
0.1	0.15	0.05	0.05		0.5	0.7	0.6			2.2	1.9
0.1	0.15	0.05	0.05		0.5	0.7	0.6			2.2	1.9
0.1	0.15	0.05	0.05		0.5	0.7	0.6			2.2	1.9
0.1	0.15	0.05	0.05		0.5	0.7	0.6			2.2	1.9
0.1	0.15	0.05	0.05		0.5	0.7	0.6			2.2	1.9
0.1	0.15	0.05	0.05		0.5	0.7	0.6			2.2	1.9
0.1	0.15	0.05	0.05		0.5	0.7	0.6			2.2	1.9
0.1	0.15	0.05	0.05		0.5	0.7	0.6			2.2	1.9
0.1	0.15	0.05	0.05		0.5	0.7	0.6			2.2	2
0.1	0.15	0.05	0.05		0.5	0.7	0.6			2.3	2
0.1	0.15	0.05	0.05		0.5	0.7	0.6			2.3	2
0.1	0.15	0.05	0.05		0.5	0.7	0.6			2.3	2
0.1	0.15	0.05	0.05		0.5	0.7	0.6			2.3	2
0.1	0.15	0.05	0.05		0.5	0.7	0.6			2.3	2
0.1	0.15	0.05	0.05		0.5	0.7	0.6			2.3	2
0.1	0.15	0.05	0.05		0.5	0.7	0.6			2.3	2
0.1	0.15	0.1	0.05		0.5	0.7	0.6			2.3	2
0.1	0.15	0.1	0.05		0.5	0.7	0.6			2.3	2
0.1	0.15	0.1	0.05		0.5	0.7	0.7			2.3	2.1
0.1	0.15	0.1	0.05		0.5	0.7	0.7			2.4	2.1
0.1	0.15	0.1	0.05		0.5	0.7	0.7			2.4	2.1
0.1	0.15	0.1	0.05		0.5	0.7	0.7			2.4	2.1
0.1	0.15	0.1	0.05		0.5	0.7	0.7			2.4	2.1
0.1	0.15	0.1	0.05		0.5	0.7	0.7			2.4	2.1
0.1	0.15	0.1	0.05		0.5	0.7	0.7			2.4	2.1
0.1	0.15	0.1	0.05		0.5	0.7	0.7			2.4	2.1
0.1	0.15	0.1	0.05		0.5	0.7	0.7			2.4	2.1
0.1	0.15	0.1	0.05		0.5	0.7	0.7			2.4	2.1
0.1	0.15	0.1	0.05		0.5	0.7	0.7			2.4	2.2
0.1	0.15	0.1	0.05		0.5	0.7	0.7			2.4	2.2
0.1	0.15	0.1	0.05		0.5	0.7	0.7			2.5	2.2
0.1	0.15	0.1	0.05		0.5	0.7	0.7			2.5	2.2
0.1	0.15	0.1	0.05		0.5	0.7	0.7			2.5	2.2
0.1	0.15	0.1	0.05		0.5	0.7	0.7			2.5	2.2
0.1	0.15	0.1	0.05		0.5	0.7	0.7			2.5	2.2
0.1	0.15	0.1	0.05		0.5	0.7	0.7			2.6	2.2
0.1	0.15	0.1	0.05		0.5	0.7	0.7			2.6	2.2
0.1	0.15	0.1	0.05		0.5	0.7	0.7			2.6	2.2
0.1	0.15	0.1	0.05		0.5	0.7	0.7			2.6	2.2
0.1	0.15	0.1	0.05		0.5	0.7	0.7			2.6	2.2
0.1	0.15	0.1	0.05		0.5	0.7	0.7			2.6	2.2
0.1	0.15	0.1	0.05		0.5	0.7	0.7			2.6	2.2
0.1	0.15	0.1	0.05		0.5	0.7	0.7			2.6	2.2
0.1	0.15	0.1	0.05		0.5	0.7	0.7			2.6	2.3
0.1	0.15	0.1	0.05		0.5	0.7	0.7			2.7	2.3
0.1	0.15	0.1	0.05		0.5	0.7	0.7			2.7	2.3
0.1	0.15	0.1	0.05		0.5	0.7	0.7			2.7	2.3
0.1	0.15	0.1	0.05		0.5	0.7	0.7			2.7	2.3
0.1	0.15	0.1	0.05		0.5	0.7	0.7			2.7	2.3
0.1	0.15	0.1	0.05		0.5	0.7	0.7			2.8	2.3
0.1	0.15	0.1	0.05		0.5	0.8	0.7			2.8	2.3
0.1	0.15	0.1	0.05		0.5	0.8	0.7			2.8	2.3
0.1	0.15	0.1	0.05		0.5	0.8	0.7			2.8	2.3
0.1	0.15	0.1	0.05		0.5	0.8	0.7			2.8	2.3
0.1	0.15	0.1	0.05		0.5	0.8	0.7			2.8	2.3
0.1	0.15	0.1	0.05		0.5	0.8	0.7			2.9	2.3
0.1	0.15	0.1	0.05		0.5	0.8	0.7			2.9	2.4
0.1	0.15	0.1	0.05		0.5	0.8	0.7			2.9	2.4
0.1	0.15	0.1	0.05		0.5	0.8	0.7			3	2.4
0.1	0.15	0.1	0.05		0.5	0.8	0.7			3	2.4
0.1	0.15	0.1	0.05		0.5	0.8	0.7			3	2.4
0.1	0.15	0.1	0.05		0.5	0.8	0.7			3	2.4
0.1	0.15	0.1	0.05		0.5	0.8	0.7			3	2.4
0.1	0.15	0.1	0.05		0.5	0.8	0.7			3.1	2.5
0.1	0.15	0.1	0.05		0.6	0.8	0.7			3.1	2.5
0.1	0.15	0.1	0.05		0.6	0.8	0.7			3.1	2.5
0.1	0.15	0.1	0.05		0.6	0.8	0.7			3.1	2.5
0.1	0.2	0.1	0.05		0.6	0.8	0.7			3.2	2.5
0.1	0.2	0.1	0.05		0.6	0.8	0.7			3.2	2.6
0.1	0.2	0.1	0.05		0.6	0.8	0.7			3.2	2.6
0.1	0.2	0.1	0.05		0.6	0.8	0.7			3.2	2.6
0.1	0.2	0.1	0.05		0.6	0.8	0.7			3.3	2.6
0.1	0.2	0.1	0.05		0.6	0.8	0.7			3.3	2.6
0.1	0.2	0.1	0.05		0.6	0.8	0.7			3.4	2.6
0.1	0.2	0.1	0.05		0.6	0.8	0.7			3.4	2.6
0.1	0.2	0.1	0.05		0.6	0.8	0.7			3.4	2.6
0.1	0.2	0.1	0.05		0.6	0.8	0.7			3.4	2.7
0.1	0.2	0.1	0.05		0.6	0.8	0.7			3.4	2.7
0.1	0.2	0.1	0.05		0.6	0.8	0.8			3.5	2.7
0.1	0.2	0.1	0.05		0.6	0.8	0.8			3.5	2.7
0.1	0.2	0.1	0.05		0.6	0.8	0.8			3.5	2.7
0.1	0.2	0.1	0.05		0.6	0.8	0.8			3.6	2.7
0.1	0.2	0.1	0.05		0.6	0.8	0.8			3.6	2.7
0.1	0.2	0.1	0.05		0.6	0.8	0.8			3.7	2.7
0.1	0.2	0.1	0.05		0.6	0.8	0.8			3.7	2.7
0.1	0.2	0.1	0.05		0.6	0.8	0.8			3.7	2.8
0.1	0.2	0.1	0.05		0.6	0.8	0.8			3.7	2.8
0.1	0.2	0.1	0.05		0.6	0.8	0.8			3.7	2.8
0.1	0.2	0.1	0.05		0.6	0.8	0.8			3.8	2.8
0.1	0.2	0.1	0.05		0.6	0.8	0.8			3.8	2.8
0.1	0.2	0.1	0.05		0.6	0.8	0.8			3.8	2.8
0.1	0.2	0.1	0.05		0.6	0.8	0.8			3.8	2.8
0.1	0.2	0.1	0.05		0.6	0.8	0.8			3.8	2.8
0.15	0.2	0.1	0.05		0.6	0.8	0.8			3.8	2.9
0.15	0.2	0.1	0.05		0.6	0.8	0.8			3.9	2.9
0.15	0.2	0.1	0.05		0.6	0.8	0.8			3.9	2.9
0.15	0.2	0.1	0.05		0.6	0.8	0.8			3.9	2.9
0.15	0.2	0.1	0.05		0.6	0.8	0.8			4	2.9
0.15	0.2	0.1	0.05		0.6	0.8	0.8			4	2.9
0.15	0.2	0.1	0.05		0.6	0.8	0.8			4.1	2.9
0.15	0.2	0.1	0.05		0.6	0.8	0.8			4.1	2.9
0.15	0.2	0.1	0.05		0.6	0.9	0.8			4.1	3
0.15	0.2	0.1	0.05		0.6	0.9	0.8			4.1	3
0.15	0.2	0.1	0.05		0.6	0.9	0.8			4.2	3
0.15	0.2	0.1	0.05		0.6	0.9	0.8			4.2	3
0.15	0.2	0.1	0.05		0.6	0.9	0.8			4.3	3
0.15	0.2	0.1	0.05		0.6	0.9	0.8			4.3	3
0.15	0.2	0.1	0.05		0.6	0.9	0.8			4.3	3
0.15	0.2	0.1	0.05		0.6	0.9	0.8			4.3	3
0.15	0.2	0.1	0.05		0.6	0.9	0.8			4.4	3
0.15	0.2	0.1	0.05		0.6	0.9	0.8			4.4	3.1
0.15	0.2	0.1	0.05		0.6	0.9	0.9			4.4	3.1
0.15	0.2	0.1	0.05		0.6	0.9	0.9			4.4	3.2
0.15	0.2	0.1	0.05		0.6	0.9	0.9			4.5	3.2
0.15	0.2	0.1	0.05		0.6	0.9	0.9			4.5	3.2
0.15	0.2	0.1	0.05		0.6	0.9	0.9			4.5	3.3
0.15	0.25	0.1	0.05		0.6	0.9	0.9			4.5	3.3
0.15	0.25	0.1	0.05		0.6	0.9	0.9			4.5	3.3
0.15	0.25	0.1	0.05		0.6	0.9	0.9			4.6	3.3
0.15	0.25	0.1	0.05		0.6	0.9	0.9			4.6	3.3
0.15	0.25	0.1	0.05		0.6	0.9	0.9			4.7	3.3
0.15	0.25	0.1	0.05		0.6	0.9	0.9			4.7	3.4
0.15	0.25	0.1	0.05		0.6	0.9	0.9			4.7	3.4
0.15	0.25	0.1	0.05		0.6	0.9	0.9			4.8	3.4
0.15	0.25	0.1	0.05		0.6	0.9	0.9			4.9	3.4
0.15	0.25	0.1	0.05		0.6	0.9	0.9			4.9	3.4
0.15	0.25	0.1	0.05		0.6	0.9	0.9			5	3.5
0.15	0.25	0.1	0.05		0.6	0.9	0.9			5.1	3.6
0.15	0.25	0.1	0.05		0.6	0.9	0.9			5.1	3.6
0.15	0.25	0.1	0.05		0.6	0.9	0.9			5.2	3.6
0.15	0.25	0.1	0.05		0.6	0.9	0.9			5.2	3.6
0.15	0.25	0.1	0.05		0.6	0.9	0.9			5.2	3.7
0.15	0.25	0.1	0.05		0.6	0.9	0.9			5.3	3.7
0.15	0.25	0.1	0.05		0.6	0.9	0.9			5.4	3.7
0.15	0.25	0.1	0.05		0.6	0.9	0.9			5.4	3.7
0.15	0.25	0.1	0.05		0.6	0.9	0.9			5.5	3.7
0.15	0.25	0.1	0.05		0.6	0.9	0.9			5.5	3.8
0.15	0.25	0.1	0.05		0.6	0.9	0.9			5.6	3.8
0.15	0.25	0.1	0.05		0.6	1	0.9			5.6	3.8
0.15	0.25	0.1	0.05		0.6	1	0.9			5.7	3.9
0.15	0.25	0.1	0.05		0.6	1	0.9			5.7	3.9
0.15	0.25	0.1	0.05		0.7	1	0.9			5.9	3.9
0.15	0.25	0.1	0.05		0.7	1	0.9			5.9	3.9
0.15	0.25	0.1	0.05		0.7	1	0.9			6.2	3.9
0.15	0.25	0.1	0.05		0.7	1	0.9			6.2	3.9
0.15	0.25	0.1	0.05		0.7	1	0.9			6.2	3.9
0.15	0.25	0.1	0.05		0.7	1	1			6.2	4
0.15	0.25	0.1	0.05		0.7	1	1			6.3	4
0.15	0.25	0.1	0.05		0.7	1	1			6.5	4
0.15	0.3	0.1	0.05		0.7	1	1			6.5	4
0.15	0.3	0.1	0.05		0.7	1	1			6.7	4
0.15	0.3	0.1	0.05		0.7	1	1			7	4
0.15	0.3	0.1	0.05		0.7	1	1			7.1	4
0.15	0.3	0.1	0.05		0.7	1	1			7.1	4.1
0.15	0.3	0.1	0.05		0.7	1	1			7.2	4.1
0.15	0.3	0.1	0.05		0.7	1	1			7.2	4.3
0.15	0.3	0.1	0.05		0.7	1	1			7.2	4.3
0.15	0.35	0.1	0.05		0.7	1	1			7.3	4.3
0.15	0.35	0.1	0.05		0.7	1	1			7.5	4.4
0.15	0.35	0.1	0.05		0.7	1.1	1			7.5	4.4
0.15	0.35	0.1	0.05		0.7	1.1	1			7.6	4.4
0.15	0.35	0.1	0.05		0.7	1.1	1			7.6	4.5
0.15	0.35	0.1	0.05		0.7	1.1	1			7.7	4.5
0.15	0.35	0.1	0.05		0.7	1.1	1			8.1	4.5
0.15	0.35	0.1	0.05		0.7	1.1	1			8.4	4.7
0.15	0.35	0.1	0.05		0.7	1.1	1			8.5	4.8
0.15	0.35	0.1	0.05		0.7	1.1	1			8.8	4.8
0.15	0.35	0.1	0.05		0.7	1.1	1			8.9	4.9
0.15	0.35	0.1	0.05		0.7	1.1	1			9	4.9
0.15	0.35	0.1	0.05		0.7	1.1	1.1			9.8	4.9
0.15	0.35	0.1	0.05		0.7	1.1	1.1			9.9	5
0.15	0.4	0.1	0.05		0.7	1.1	1.1			9.9	5.1
0.15	0.4	0.1	0.05		0.7	1.1	1.1			10	5.1
0.15	0.4	0.1	0.05		0.7	1.1	1.1			10	5.2
0.15	0.4	0.1	0.05		0.7	1.1	1.1			10.1	5.2
0.15	0.4	0.1	0.05		0.7	1.1	1.1			10.2	5.2
0.2	0.4	0.1	0.05		0.7	1.1	1.1			10.3	5.3
0.2	0.4	0.1	0.05		0.7	1.1	1.1			10.5	5.3
0.2	0.4	0.1	0.05		0.7	1.1	1.1			10.5	5.4
0.2	0.4	0.1	0.05		0.7	1.1	1.1			10.9	5.4
0.2	0.4	0.1	0.05		0.7	1.1	1.1			11	5.4
0.2	0.45	0.1	0.05		0.8	1.1	1.1			11.5	5.5
0.2	0.5	0.1	0.05		0.8	1.1	1.1			11.6	5.5
0.2	0.5	0.1	0.05		0.8	1.1	1.1			12.4	5.6
0.2	0.55	0.1	0.05		0.8	1.2	1.1			13	5.6
0.2	0.6	0.1	0.05		0.8	1.2	1.1			13.4	5.6
0.2	0.6	0.1	0.05		0.8	1.2	1.1			14.5	5.7
0.2	0.65	0.1	0.05		0.8	1.2	1.1			14.6	5.7
0.2	0.65	0.1	0.05		0.8	1.2	1.1			14.7	5.7
0.2	0.65	0.1	0.05		0.8	1.2	1.1			15.2	5.8
0.2	0.65	0.1	0.05		0.8	1.2	1.1			15.3	5.8
0.2	0.65	0.1	0.05		0.8	1.2	1.1			15.6	5.8
0.2	0.7	0.1	0.05		0.8	1.2	1.1			17.3	5.8
0.2	0.7	0.1	0.05		0.8	1.2	1.1			18.2	5.8
0.2	0.7	0.1	0.05		0.8	1.2	1.1			19.1	5.9
0.2	0.7	0.1	0.05		0.8	1.2	1.1			19.6	5.9
0.2	0.75	0.1	0.05		0.8	1.2	1.1			20.1	5.9
0.2	0.75	0.1	0.05		0.8	1.2	1.1				5.9
0.2	0.8	0.1	0.05		0.8	1.2	1.2				6
0.2	0.85	0.1	0.05		0.8	1.2	1.2				6
0.2	0.95	0.1	0.05		0.8	1.2	1.2				6
0.2	0.95	0.1	0.05		0.8	1.2	1.2				6
0.2	1	0.1	0.05		0.8	1.3	1.2				6.1
0.2	1	0.1	0.05		0.8	1.3	1.2				6.2
0.2	1.05	0.1	0.05		0.8	1.3	1.2				6.2
0.2	1.05	0.1	0.05		0.8	1.3	1.2				6.3
0.2	1.05	0.1	0.05		0.8	1.3	1.2				6.4
0.2	1.05	0.1	0.05		0.8	1.3	1.2				6.4
0.2	1.1	0.1	0.05		0.8	1.3	1.2				6.5
0.2	1.1	0.1	0.05		0.8	1.3	1.2				6.5
0.2	1.1	0.1	0.05		0.8	1.3	1.2				6.5
0.2	1.2	0.1	0.05		0.8	1.3	1.2				6.6
0.2	1.25	0.1	0.05		0.8	1.3	1.2				6.7
0.2	1.3	0.1	0.05		0.8	1.3	1.2				6.8
0.2	1.5	0.1	0.05		0.8	1.3	1.2				6.8
0.2	1.6	0.1	0.05		0.8	1.3	1.2				6.8
0.25	1.6	0.1	0.05		0.8	1.3	1.2				6.9
0.25	1.7	0.1	0.05		0.8	1.3	1.2				6.9
0.25	1.8	0.1	0.05		0.8	1.3	1.2				6.9
0.25	1.95	0.1	0.05		0.8	1.3	1.2				6.9
0.25	2	0.1	0.05		0.8	1.3	1.3				7
0.25	2.05	0.1	0.05		0.8	1.3	1.3				7.1
0.25	2.1	0.1	0.05		0.9	1.3	1.3				7.1
0.25	2.1	0.1	0.05		0.9	1.3	1.3				7.2
0.25	2.35	0.1	0.05		0.9	1.3	1.3				7.4
0.25	2.6	0.1	0.05		0.9	1.4	1.3				7.5
0.25	2.75	0.1	0.05		0.9	1.4	1.3				7.6
0.25	2.95	0.1	0.05		0.9	1.4	1.3				7.8
0.25	3.35	0.1	0.05		0.9	1.4	1.3				7.8
0.25		0.1	0.05		0.9	1.4	1.3				7.9
0.25		0.1	0.05		0.9	1.4	1.3				8
0.25		0.1	0.05		0.9	1.4	1.3				8.2
0.25		0.1	0.05		0.9	1.4	1.3				8.3
0.25		0.1	0.05		0.9	1.4	1.3				8.4
0.25		0.1	0.05		0.9	1.4	1.3				8.4
0.25		0.1	0.05		0.9	1.4	1.3				8.8
0.25		0.1	0.05		0.9	1.4	1.3				9
0.25		0.1	0.05		0.9	1.4	1.3				9
0.25		0.1	0.05		0.9	1.4	1.3				9.1
0.25		0.1	0.05		0.9	1.4	1.4				9.6
0.25		0.1	0.05		0.9	1.4	1.4				10.1
0.25		0.1	0.05		0.9	1.5	1.4				10.2
0.25		0.1	0.05		0.9	1.5	1.4				10.3
0.25		0.1	0.05		0.9	1.5	1.4				10.4
0.3		0.1	0.05		0.9	1.5	1.4				10.5
0.3		0.1	0.05		0.9	1.5	1.4				10.9
0.3		0.1	0.05		0.9	1.5	1.4				10.9
0.3		0.1	0.05		0.9	1.5	1.4				11
0.3		0.1	0.05		0.9	1.5	1.4				11.4
0.3		0.1	0.05		0.9	1.5	1.4				11.4
0.3		0.1	0.05		0.9	1.5	1.4				11.8
0.3		0.1	0.05		0.9	1.5	1.4				11.9
0.3		0.1	0.05		0.9	1.5	1.4				12
0.3		0.1	0.05		0.9	1.6	1.4				12.6
0.35		0.1	0.05		0.9	1.6	1.4				12.7
0.35		0.1	0.05		0.9	1.6	1.4				12.8
0.35		0.1	0.05		0.9	1.6	1.5				13.1
0.35		0.1	0.05		0.9	1.6	1.5				13.6
0.35		0.1	0.05		1	1.6	1.5				14.4
0.35		0.1	0.05		1	1.6	1.5				14.7
0.35		0.1	0.05		1	1.6	1.5				15.8
0.35		0.15	0.05		1	1.6	1.5				16.6
0.35		0.15	0.05		1	1.6	1.5				16.9
0.35		0.15	0.05		1	1.6	1.5				18.1
0.35		0.15	0.05		1	1.7	1.5				18.2
0.4		0.15	0.05		1	1.7	1.5				18.7
0.4		0.15	0.05		1	1.7	1.5
0.4		0.15	0.05		1	1.7	1.5
0.4		0.15	0.05		1	1.7	1.5
0.4		0.15	0.05		1	1.7	1.5
0.4		0.15	0.05		1	1.7	1.5
0.45		0.15	0.05		1	1.8	1.6
0.45		0.15	0.05		1	1.8	1.6
0.45		0.15	0.05		1	1.8	1.6
0.45		0.15	0.05		1	1.8	1.6
0.45		0.15	0.05		1	1.8	1.6
0.45		0.15	0.05		1	1.9	1.6
0.45		0.15	0.05		1	1.9	1.6
0.45		0.15	0.05		1	1.9	1.6
0.5		0.15	0.05		1	1.9	1.6
0.5		0.15	0.05		1	1.9	1.6
0.5		0.15	0.05		1	1.9	1.6
0.55		0.15	0.05		1	1.9	1.6
0.55		0.15	0.05		1	1.9	1.6
0.55		0.15	0.05		1	1.9	1.7
0.6		0.15	0.05		1	1.9	1.7
0.6		0.15	0.05		1	1.9	1.7
0.6		0.15	0.05		1	1.9	1.7
0.6		0.15	0.05		1	2	1.7
0.75		0.15	0.05		1	2	1.7
0.75		0.15	0.05		1.1	2	1.7
0.8		0.15	0.05		1.1	2	1.7
0.8		0.15	0.05		1.1	2	1.7
0.85		0.15	0.05		1.1	2	1.7
0.85		0.15	0.05		1.1	2	1.8
0.95		0.15	0.05		1.1	2	1.8
0.95		0.15	0.05		1.1	2.1	1.8
1		0.15	0.05		1.1	2.1	1.8
1		0.15	0.05		1.1	2.1	1.8
1.15		0.15	0.05		1.1	2.2	1.8
1.2		0.15	0.05		1.1	2.2	1.8
1.25		0.15	0.05		1.1	2.2	1.8
1.45		0.15	0.05		1.2	2.2	1.9
1.8		0.15	0.05		1.2	2.2	1.9
2.15		0.15	0.05		1.2	2.2	1.9
3		0.15	0.05		1.2	2.3	1.9
3.05		0.15	0.05		1.2	2.4	1.9
		0.15	0.05		1.2	2.4	1.9
		0.15	0.05		1.2	2.5	1.9
		0.15	0.05		1.2	2.5	1.9
		0.15	0.05		1.2	2.7	1.9
		0.15	0.05		1.2	2.7	1.9
		0.15	0.05		1.2	2.7	1.9
		0.15	0.05		1.2	2.7	2
		0.15	0.05		1.2	2.8	2
		0.15	0.05		1.2	2.9	2
		0.15	0.05		1.2	3	2
		0.15	0.05		1.2	3.1	2
		0.15	0.05		1.2		2
		0.15	0.05		1.3		2.1
		0.15	0.05		1.3		2.1
		0.15	0.05		1.3		2.1
		0.15	0.05		1.3		2.1
		0.15	0.05		1.3		2.1
		0.15	0.05		1.3		2.1
		0.15	0.05		1.3		2.1
		0.15	0.05		1.3		2.2
		0.15	0.05		1.3		2.2
		0.15	0.05		1.3		2.2
		0.15	0.05		1.3		2.2
		0.15	0.05		1.3		2.2
		0.15	0.05		1.3		2.2
		0.15	0.05		1.3		2.2
		0.15	0.05		1.3		2.2
		0.15	0.05		1.3		2.3
		0.15	0.05		1.4		2.4
		0.15	0.05		1.4		2.4
		0.15	0.05		1.4		2.4
		0.15	0.05		1.4		2.4
		0.15	0.05		1.4		2.5
		0.15	0.05		1.4		2.5
		0.15	0.05		1.4		2.6
		0.15	0.05		1.4		2.6
		0.15	0.05		1.4		2.7
		0.15	0.05		1.4		2.7
		0.15	0.05		1.4		2.7
		0.15	0.05		1.4		2.7
		0.15	0.05		1.4		3.1
		0.15	0.05		1.4		3.2
		0.15	0.05		1.4		3.2
		0.15	0.05		1.5		3.3
		0.15	0.05		1.5		3.3
		0.15	0.05		1.5		3.3
		0.15	0.05		1.5		3.3
		0.15	0.05		1.5		3.4
		0.15	0.05		1.5		3.5
		0.15	0.05		1.5		3.6
		0.15	0.05		1.5		3.8
		0.15	0.05		1.5		3.9
		0.15	0.05		1.5		3.9
		0.15	0.05		1.5		4.3
		0.15	0.05		1.5		4.7
		0.15	0.05		1.6
		0.15	0.05		1.6
		0.15	0.05		1.6
		0.15	0.05		1.6
		0.15	0.05		1.6
		0.15	0.05		1.6
		0.15	0.05		1.6
		0.15	0.05		1.7
		0.15	0.05		1.7
		0.15	0.05		1.7
		0.15	0.05		1.7
		0.15	0.05		1.7
		0.15	0.05		1.7
		0.15	0.05		1.7
		0.15	0.05		1.7
		0.15	0.05		1.7
		0.15	0.05		1.7
		0.15	0.05		1.8
		0.15	0.05		1.8
		0.15	0.05		1.8
		0.15	0.05		1.8
		0.15	0.05		1.8
		0.15	0.05		1.8
		0.15	0.05		1.8
		0.2	0.05		1.8
		0.2	0.05		1.8
		0.2	0.05		1.9
		0.2	0.05		1.9
		0.2	0.05		1.9
		0.2	0.05		1.9
		0.2	0.05		1.9
		0.2	0.05		1.9
		0.2	0.05		2
		0.2	0.05		2
		0.2	0.05		2
		0.2	0.05		2
		0.2	0.05		2.1
		0.2	0.05		2.1
		0.2	0.05		2.1
		0.2	0.05		2.1
		0.2	0.05		2.1
		0.2	0.05		2.2
		0.2	0.05		2.2
		0.2	0.05		2.2
		0.2	0.05		2.2
		0.2	0.05		2.3
		0.2	0.05		2.3
		0.2	0.05		2.3
		0.2	0.05		2.3
		0.2	0.05		2.4
		0.2	0.05		2.5
		0.2	0.05		2.6
		0.2	0.05		2.6
		0.2	0.05		2.6
		0.2	0.05		2.6
		0.2	0.05		2.7
		0.2	0.05		2.7
		0.2	0.05		2.7
		0.2	0.05		2.7
		0.2	0.05		2.7
		0.2	0.05		2.7
		0.2	0.05		2.8
		0.2	0.05		2.8
		0.2	0.05		2.9
		0.2	0.05		2.9
		0.2	0.05		3
		0.2	0.05		3
		0.2	0.05		3
		0.2	0.05		3
		0.2	0.05		3.1
		0.2	0.05		3.1
		0.2	0.05		3.2
		0.2	0.05		3.3
		0.2	0.05		3.4
		0.2	0.05		3.6
		0.2	0.05		3.6
		0.2	0.05		3.6
		0.2	0.05		3.6
		0.2	0.05		3.7
		0.2	0.05		3.7
		0.2	0.05		4
		0.2	0.05
		0.2	0.05
		0.2	0.05
		0.2	0.05
		0.2	0.05
		0.2	0.05
		0.25	0.05
		0.25	0.05
		0.25	0.05
		0.25	0.05
		0.25	0.05
		0.25	0.05
		0.25	0.05
		0.25	0.05
		0.25	0.05
		0.25	0.05
		0.25	0.05
		0.25	0.05
		0.25	0.05
		0.25	0.05
		0.25	0.05
		0.25	0.05
		0.25	0.05
		0.25	0.05
		0.25	0.05
		0.25	0.05
		0.25	0.05
		0.25	0.05
		0.25	0.05
		0.25	0.05
		0.25	0.05
		0.25	0.05
		0.3	0.05
		0.3	0.05
		0.3	0.05
		0.3	0.05
		0.3	0.05
		0.3	0.05
		0.3	0.05
		0.3	0.05
		0.3	0.05
		0.3	0.05
		0.3	0.05
		0.3	0.05
		0.3	0.05
		0.3	0.05
		0.3	0.05
		0.3	0.05
		0.3	0.05
		0.3	0.05
		0.3	0.05
		0.3	0.05
		0.3	0.05
		0.3	0.05
		0.3	0.05
		0.3	0.05
		0.3	0.05
		0.3	0.05
		0.3	0.05
		0.3	0.05
		0.3	0.05
		0.35	0.05
		0.35	0.05
		0.35	0.05
		0.35	0.05
		0.35	0.05
		0.35	0.05
		0.35	0.05
		0.35	0.05
		0.35	0.05
		0.35	0.05
		0.35	0.05
		0.35	0.05
		0.35	0.05
		0.35	0.05
		0.35	0.05
		0.35	0.05
		0.4	0.05
		0.4	0.05
		0.4	0.05
		0.4	0.05
		0.4	0.05
		0.4	0.05
		0.4	0.05
		0.45	0.05
		0.45	0.05
		0.45	0.05
		0.45	0.05
		0.45	0.05
		0.45	0.05
		0.5	0.05
		0.5	0.05
		0.5	0.05
		0.5	0.05
		0.5	0.05
		0.5	0.05
		0.5	0.05
		0.5	0.05
		0.55	0.05
		0.55	0.05
		0.6	0.05
		0.6	0.05
		0.6	0.05
		0.6	0.05
		0.65	0.05
		0.65	0.05
		0.65	0.05
		0.65	0.05
		0.65	0.05
		0.65	0.05
		0.7	0.05
		0.7	0.05
		0.7	0.05
		0.7	0.05
		0.75	0.05
		0.8	0.05
		0.85	0.05
		0.9	0.05
		0.9	0.05
		0.9	0.05
		0.95	0.05
		1	0.05
		1	0.05
		1.05	0.05
		1.05	0.05
		1.1	0.05
		1.15	0.05
		1.35	0.05
		1.35	0.05
		1.5	0.05
		1.6	0.05
		1.7	0.05
		1.85	0.05
		2.05	0.05
		2.1	0.05
		2.35	0.05
		2.35	0.05
		2.35	0.05
		2.45	0.05
		2.45	0.05
		2.65	0.05
		2.65	0.05
		2.85	0.05
		2.85	0.05
		3.45	0.05
			0.05
			0.05
			0.05
			0.05
			0.05
			0.05
			0.05
			0.05
			0.05
			0.05
			0.05
			0.05
			0.05
			0.05
			0.05
			0.05
			0.05
			0.05
			0.05
			0.05
			0.05
			0.05
			0.05
			0.05
			0.05
			0.05
			0.05
			0.05
			0.05
			0.05
			0.05
			0.05
			0.05
			0.05
			0.05
			0.05
			0.05
			0.05
			0.05
			0.05
			0.05
			0.05
			0.05
			0.05
			0.05
			0.05
			0.05
			0.05
			0.05
			0.05
			0.05
			0.05
			0.05
			0.05
			0.05
			0.05
			0.05
			0.05
			0.05
			0.05
			0.05
			0.05
			0.05
			0.05
			0.05
			0.05
			0.05
			0.05
			0.05
			0.05
			0.05
			0.05
			0.05
			0.05
			0.05
			0.05
			0.05
			0.05
			0.05
			0.05
			0.05
			0.05
			0.05
			0.05
			0.05
			0.05
			0.05
			0.05
			0.05
			0.05
			0.05
			0.05
			0.05
			0.05
			0.05
			0.05
			0.05
			0.05
			0.05
			0.05
			0.05
			0.05
			0.05
			0.05
			0.05
			0.05
			0.05
			0.05
			0.05
			0.05
			0.05
			0.05
			0.05
			0.05
			0.05
			0.05
			0.05
			0.05
			0.05
			0.05
			0.05
			0.05
			0.05
			0.05
			0.05
			0.05
			0.05
			0.05
			0.05
			0.05
			0.05
			0.05
			0.05
			0.1
			0.1
			0.1
			0.1
			0.1
			0.1
			0.1
			0.1
			0.1
			0.1
			0.1
			0.1
			0.1
			0.1
			0.1
			0.1
			0.1
			0.1
			0.1
			0.1
			0.1
			0.1
			0.1
			0.1
			0.1
			0.1
			0.1
			0.1
			0.1
			0.1
			0.1
			0.1
			0.1
			0.1
			0.1
			0.1
			0.1
			0.1
			0.1
			0.1
			0.1
			0.1
			0.1
			0.1
			0.1
			0.1
			0.1
			0.1
			0.1
			0.1
			0.1
			0.1
			0.1
			0.1
			0.1
			0.1
			0.1
			0.1
			0.1
			0.1
			0.1
			0.1
			0.1
			0.1
			0.1
			0.1
			0.1
			0.1
			0.1
			0.1
			0.1
			0.1
			0.1
			0.1
			0.1
			0.1
			0.1
			0.1
			0.1
			0.1
			0.1
			0.1
			0.1
			0.1
			0.1
			0.1
			0.1
			0.1
			0.1
			0.1
			0.1
			0.1
			0.1
			0.1
			0.1
			0.1
			0.1
			0.1
			0.1
			0.1
			0.1
			0.1
			0.1
			0.1
			0.1
			0.1
			0.1
			0.1
			0.1
			0.1
			0.1
			0.1
			0.1
			0.1
			0.1
			0.1
			0.1
			0.1
			0.1
			0.1
			0.1
			0.1
			0.1
			0.1
			0.1
			0.1
			0.1
			0.1
			0.1
			0.1
			0.1
			0.1
			0.1
			0.1
			0.1
			0.1
			0.1
			0.1
			0.1
			0.1
			0.1
			0.1
			0.1
			0.1
			0.1
			0.1
			0.1
			0.1
			0.1
			0.1
			0.1
			0.1
			0.1
			0.1
			0.1
			0.1
			0.1
			0.1
			0.1
			0.1
			0.1
			0.1
			0.1
			0.1
			0.1
			0.1
			0.1
			0.1
			0.1
			0.1
			0.1
			0.1
			0.1
			0.1
			0.1
			0.1
			0.1
			0.1
			0.1
			0.1
			0.1
			0.1
			0.1
			0.1
			0.1
			0.1
			0.1
			0.1
			0.1
			0.1
			0.1
			0.1
			0.1
			0.1
			0.1
			0.1
			0.1
			0.1
			0.1
			0.1
			0.1
			0.1
			0.1
			0.1
			0.1
			0.1
			0.1
			0.1
			0.1
			0.1
			0.1
			0.1
			0.1
			0.1
			0.1
			0.1
			0.1
			0.1
			0.1
			0.1
			0.1
			0.1
			0.1
			0.1
			0.1
			0.1
			0.1
			0.1
			0.1
			0.1
			0.1
			0.1
			0.1
			0.1
			0.1
			0.1
			0.1
			0.1
			0.1
			0.1
			0.1
			0.1
			0.1
			0.1
			0.1
			0.1
			0.1
			0.1
			0.1
			0.1
			0.1
			0.1
			0.1
			0.1
			0.1
			0.1
			0.1
			0.1
			0.1
			0.1
			0.1
			0.1
			0.1
			0.1
			0.1
			0.1
			0.1
			0.1
			0.1
			0.1
			0.1
			0.1
			0.1
			0.1
			0.1
			0.1
			0.1
			0.1
			0.1
			0.1
			0.1
			0.1
			0.1
			0.1
			0.1
			0.1
			0.1
			0.1
			0.1
			0.1
			0.1
			0.1
			0.1
			0.1
			0.1
			0.1
			0.1
			0.1
			0.1
			0.1
			0.1
			0.1
			0.1
			0.1
			0.1
			0.1
			0.1
			0.1
			0.1
			0.1
			0.1
			0.1
			0.1
			0.1
			0.1
			0.1
			0.1
			0.1
			0.1
			0.1
			0.1
			0.1
			0.1
			0.1
			0.1
			0.1
			0.1
			0.1
			0.1
			0.1
			0.1
			0.1
			0.1
			0.1
			0.1
			0.1
			0.1
			0.1
			0.1
			0.1
			0.1
			0.1
			0.1
			0.1
			0.1
			0.1
			0.1
			0.1
			0.1
			0.1
			0.1
			0.1
			0.1
			0.1
			0.1
			0.1
			0.1
			0.1
			0.1
			0.1
			0.1
			0.1
			0.1
			0.1
			0.1
			0.1
			0.1
			0.1
			0.1
			0.1
			0.1
			0.1
			0.1
			0.1
			0.1
			0.1
			0.1
			0.1
			0.1
			0.1
			0.1
			0.1
			0.1
			0.1
			0.1
			0.1
			0.1
			0.1
			0.1
			0.1
			0.1
			0.1
			0.1
			0.1
			0.1
			0.1
			0.1
			0.1
			0.1
			0.1
			0.1
			0.1
			0.1
			0.1
			0.1
			0.1
			0.1
			0.1
			0.1
			0.1
			0.1
			0.1
			0.1
			0.1
			0.1
			0.1
			0.1
			0.1
			0.1
			0.1
			0.1
			0.1
			0.1
			0.1
			0.1
			0.1
			0.1
			0.1
			0.1
			0.1
			0.1
			0.1
			0.1
			0.1
			0.1
			0.1
			0.1
			0.1
			0.1
			0.1
			0.1
			0.1
			0.1
			0.1
			0.1
			0.1
			0.1
			0.1
			0.1
			0.1
			0.1
			0.1
			0.1
			0.1
			0.1
			0.1
			0.1
			0.1
			0.1
			0.1
			0.1
			0.1
			0.1
			0.1
			0.1
			0.1
			0.1
			0.1
			0.1
			0.1
			0.1
			0.1
			0.1
			0.1
			0.1
			0.1
			0.1
			0.1
			0.1
			0.1
			0.1
			0.1
			0.1
			0.1
			0.1
			0.1
			0.1
			0.1
			0.1
			0.1
			0.1
			0.1
			0.1
			0.1
			0.1
			0.1
			0.1
			0.1
			0.1
			0.1
			0.1
			0.1
			0.15
			0.15
			0.15
			0.15
			0.15
			0.15
			0.15
			0.15
			0.15
			0.15
			0.15
			0.15
			0.15
			0.15
			0.15
			0.15
			0.15
			0.15
			0.15
			0.15
			0.15
			0.15
			0.15
			0.15
			0.15
			0.15
			0.15
			0.15
			0.15
			0.15
			0.15
			0.15
			0.15
			0.15
			0.15
			0.15
			0.15
			0.15
			0.15
			0.15
			0.15
			0.15
			0.15
			0.15
			0.15
			0.15
			0.15
			0.15
			0.15
			0.15
			0.15
			0.15
			0.15
			0.15
			0.15
			0.15
			0.15
			0.15
			0.15
			0.15
			0.15
			0.15
			0.15
			0.15
			0.15
			0.15
			0.15
			0.15
			0.15
			0.15
			0.15
			0.15
			0.15
			0.15
			0.15
			0.15
			0.15
			0.15
			0.15
			0.15
			0.15
			0.15
			0.15
			0.15
			0.15
			0.15
			0.15
			0.15
			0.15
			0.15
			0.15
			0.15
			0.15
			0.15
			0.15
			0.15
			0.15
			0.15
			0.15
			0.15
			0.15
			0.15
			0.15
			0.15
			0.15
			0.15
			0.15
			0.15
			0.15
			0.15
			0.15
			0.15
			0.15
			0.15
			0.15
			0.15
			0.15
			0.15
			0.15
			0.15
			0.15
			0.15
			0.15
			0.15
			0.15
			0.15
			0.15
			0.15
			0.15
			0.15
			0.15
			0.15
			0.15
			0.15
			0.15
			0.15
			0.15
			0.15
			0.15
			0.15
			0.15
			0.15
			0.15
			0.15
			0.15
			0.15
			0.15
			0.15
			0.15
			0.15
			0.15
			0.15
			0.15
			0.15
			0.15
			0.15
			0.15
			0.15
			0.15
			0.15
			0.15
			0.15
			0.15
			0.15
			0.15
			0.15
			0.15
			0.15
			0.15
			0.15
			0.15
			0.15
			0.15
			0.15
			0.15
			0.15
			0.15
			0.15
			0.15
			0.15
			0.15
			0.15
			0.15
			0.15
			0.15
			0.15
			0.15
			0.15
			0.15
			0.15
			0.15
			0.15
			0.15
			0.15
			0.15
			0.15
			0.15
			0.15
			0.15
			0.15
			0.15
			0.15
			0.15
			0.2
			0.2
			0.2
			0.2
			0.2
			0.2
			0.2
			0.2
			0.2
			0.2
			0.2
			0.2
			0.2
			0.2
			0.2
			0.2
			0.2
			0.2
			0.2
			0.2
			0.2
			0.2
			0.2
			0.2
			0.2
			0.2
			0.2
			0.2
			0.2
			0.2
			0.2
			0.2
			0.2
			0.2
			0.2
			0.2
			0.2
			0.2
			0.2
			0.2
			0.2
			0.2
			0.2
			0.2
			0.2
			0.2
			0.2
			0.2
			0.2
			0.2
			0.2
			0.2
			0.2
			0.2
			0.2
			0.2
			0.2
			0.2
			0.2
			0.2
			0.2
			0.2
			0.2
			0.2
			0.2
			0.2
			0.2
			0.2
			0.2
			0.2
			0.2
			0.2
			0.2
			0.2
			0.2
			0.2
			0.2
			0.2
			0.2
			0.2
			0.2
			0.2
			0.2
			0.2
			0.2
			0.2
			0.2
			0.2
			0.2
			0.2
			0.2
			0.2
			0.2
			0.2
			0.2
			0.2
			0.2
			0.2
[truncated: 308 more rows]
