# Supplementary material for: Membrane-mediated dimerization potentiates PIP5K lipid kinase activity
Source: eLife. 2022 Aug 17;11:e73747. doi: 10.7554/eLife.73747 (PMC9470164; doi:10.7554/eLife.73747)
Supplement: Figure 3—source data 3. [file elife-73747-fig3-data3.xlsx]

## Sheet: Figure 3E
Figure 3E
Single molecule dwell times for Ax647-5KB (+ 50nM dark 5KB) (raw data, sorted) units= sec						Cumulative frequency distributions for Ax647-5KB (+ 50nM dark 5KB)						Single molecule dwell times for Ax647-5KB (D51R) (+ 50nM dark 5KB) (raw data, sorted) units = sec						Cumulative frequency distributions for Ax647-5KB (D51R) (+ 50nM dark 5KB)							FINAL STATISTICS
mov 1 (2% PIP2)	mov 2 (2% PIP2)	mov 3 (2% PIP2)	mov 4 (2% PIP2)			time (sec) Bin Center	mov 1 (2% PIP2)	mov 2 (2% PIP2)	mov 3 (2% PIP2)	mov 4 (2% PIP2)		mov 1 (2% PIP2)	mov 2 (2% PIP2)	mov 3 (2% PIP2)	mov 4 (2% PIP2)	mov 5 (2% PIP2)		time (sec) Bin Center	mov 1 (2% PIP2)	mov 2 (2% PIP2)	mov 3 (2% PIP2)	mov 4 (2% PIP2)	mov 5 (2% PIP2)		Ax647-5KB(+50nM DARK)_DWELL TIMES	movie	mov1	mov2	mov3	mov4		AVE	SD
0.1	0.1	0.1	0.1			0	0	0	0	0		0.1	0.1	0.1	0.1	0.1		0	0	0	0	0	0			alpha	0.6259	0.5229	0.5341	0.4285		0.52785	0.0807213
0.1	0.1	0.1	0.1			0.05	0	0	0	0		0.1	0.1	0.1	0.1	0.1		0.05	0	0	0	0	0			T1	1.053	0.6644	0.6313	0.4862		0.708725	0.242213
0.1	0.1	0.1	0.1			0.1	0.0467433	0.0798991	0.0886784	0.0902603		0.1	0.1	0.1	0.1	0.1		0.1	0.128695	0.145085	0.156356	0.166247	0.165364			T2	2.552	2.673	2.629	2.092		2.4865	0.267712
0.1	0.1	0.1	0.1			0.15	0.0827586	0.142557	0.136031	0.154072		0.1	0.1	0.1	0.1	0.1		0.15	0.235837	0.264407	0.261727	0.280101	0.288635			N	2610	2378	2323	2382		9693
0.1	0.1	0.1	0.1			0.2	0.114176	0.187553	0.182523	0.203191		0.1	0.1	0.1	0.1	0.1		0.2	0.336207	0.36339	0.369137	0.383879	0.391461
0.1	0.1	0.1	0.1			0.25	0.151341	0.229605	0.223418	0.247691		0.1	0.1	0.1	0.1	0.1		0.25	0.413177	0.451525	0.455472	0.479597	0.468431		Ax647-5KB(D51R)(+50nM DARK)_DWELL TIMES	movie	mov1	mov2	mov3	mov4	mov5	AVE	SD
0.1	0.1	0.1	0.1			0.3	0.184291	0.262826	0.262161	0.284215		0.1	0.1	0.1	0.1	0.1		0.3	0.488916	0.519322	0.513936	0.547103	0.538184			T1	0.4334	0.4196	0.4406	0.4014	0.3869	0.42375	0.0222493
0.1	0.1	0.1	0.1			0.35	0.216858	0.293524	0.291864	0.321159		0.1	0.1	0.1	0.1	0.1		0.35	0.557882	0.576949	0.569001	0.607557	0.599519			N	1624	1475	1471	1985	1663	8218
0.1	0.1	0.1	0.1			0.4	0.249425	0.325904	0.326302	0.354324		0.1	0.1	0.1	0.1	0.1		0.4	0.611453	0.630508	0.617267	0.653904	0.648827
0.1	0.1	0.1	0.1			0.45	0.275479	0.349874	0.356436	0.376994		0.1	0.1	0.1	0.1	0.1		0.45	0.663177	0.673898	0.652617	0.697229	0.703548
0.1	0.1	0.1	0.1			0.5	0.301533	0.373003	0.38743	0.405542		0.1	0.1	0.1	0.1	0.1		0.5	0.701355	0.707797	0.685248	0.727456	0.74564
0.1	0.1	0.1	0.1			0.55	0.332184	0.39487	0.412828	0.434929		0.1	0.1	0.1	0.1	0.1		0.55	0.735837	0.736271	0.722638	0.759698	0.778713
0.1	0.1	0.1	0.1			0.6	0.358621	0.412952	0.435644	0.453401		0.1	0.1	0.1	0.1	0.1		0.6	0.763547	0.772203	0.747791	0.788413	0.807577
0.1	0.1	0.1	0.1			0.65	0.381992	0.432717	0.458028	0.473132		0.1	0.1	0.1	0.1	0.1		0.65	0.785099	0.797288	0.775663	0.810579	0.832231
0.1	0.1	0.1	0.1			0.7	0.403831	0.449537	0.476539	0.496641		0.1	0.1	0.1	0.1	0.1		0.7	0.812808	0.818305	0.794697	0.827204	0.853277
0.1	0.1	0.1	0.1			0.75	0.421073	0.470143	0.49548	0.511755		0.1	0.1	0.1	0.1	0.1		0.75	0.830049	0.841356	0.813732	0.845844	0.870716
0.1	0.1	0.1	0.1			0.8	0.439464	0.492431	0.514851	0.528128		0.1	0.1	0.1	0.1	0.1		0.8	0.850985	0.854915	0.834126	0.86398	0.880337
0.1	0.1	0.1	0.1			0.85	0.462069	0.509672	0.527335	0.538623		0.1	0.1	0.1	0.1	0.1		0.85	0.870074	0.874576	0.853161	0.875567	0.892363
0.1	0.1	0.1	0.1			0.9	0.481609	0.525652	0.54025	0.556255		0.1	0.1	0.1	0.1	0.1		0.9	0.886084	0.887458	0.870836	0.887154	0.905592
0.1	0.1	0.1	0.1			0.95	0.499234	0.537006	0.552303	0.56927		0.1	0.1	0.1	0.1	0.1		0.95	0.899015	0.894237	0.878994	0.900756	0.915213
0.1	0.1	0.1	0.1			1	0.515709	0.547098	0.566078	0.584803		0.1	0.1	0.1	0.1	0.1		1	0.908867	0.907119	0.89123	0.908816	0.923031
0.1	0.1	0.1	0.1			1.05	0.529885	0.560135	0.579423	0.594458		0.1	0.1	0.1	0.1	0.1		1.05	0.919951	0.920678	0.903467	0.91738	0.934456
0.1	0.1	0.1	0.1			1.1	0.544444	0.574012	0.590616	0.606213		0.1	0.1	0.1	0.1	0.1		1.1	0.93165	0.92678	0.913664	0.928967	0.94107
0.1	0.1	0.1	0.1			1.15	0.557088	0.584945	0.601808	0.616289		0.1	0.1	0.1	0.1	0.1		1.15	0.939655	0.936271	0.921822	0.937028	0.944077
0.1	0.1	0.1	0.1			1.2	0.56705	0.597561	0.61257	0.630563		0.1	0.1	0.1	0.1	0.1		1.2	0.94766	0.942373	0.92998	0.940554	0.947685
0.1	0.1	0.1	0.1			1.25	0.580843	0.605971	0.622471	0.642737		0.1	0.1	0.1	0.1	0.1		1.25	0.95197	0.950508	0.938817	0.947103	0.953097
0.1	0.1	0.1	0.1			1.3	0.59387	0.617746	0.636246	0.654072		0.1	0.1	0.1	0.1	0.1		1.3	0.955049	0.95661	0.943576	0.95063	0.959711
0.1	0.1	0.1	0.1			1.35	0.609195	0.6291	0.646147	0.667926		0.1	0.1	0.1	0.1	0.1		1.35	0.958744	0.96	0.946975	0.957179	0.965725
0.1	0.1	0.1	0.1			1.4	0.618774	0.640454	0.656479	0.677582		0.1	0.1	0.1	0.1	0.1		1.4	0.964901	0.962712	0.953093	0.95869	0.969333
0.1	0.1	0.1	0.1			1.45	0.630268	0.649706	0.667671	0.684719		0.1	0.1	0.1	0.1	0.1		1.45	0.969212	0.96678	0.960571	0.963224	0.972339
0.1	0.1	0.1	0.1			1.5	0.64023	0.662321	0.679724	0.696054		0.1	0.1	0.1	0.1	0.1		1.5	0.973522	0.968136	0.96329	0.965239	0.974143
0.1	0.1	0.1	0.1			1.55	0.65249	0.675357	0.689195	0.703191		0.1	0.1	0.1	0.1	0.1		1.55	0.975369	0.970169	0.968049	0.968766	0.97715
0.1	0.1	0.1	0.1			1.6	0.664751	0.680824	0.695652	0.711167		0.1	0.1	0.1	0.1	0.1		1.6	0.976601	0.972203	0.970088	0.970781	0.980156
0.1	0.1	0.1	0.1			1.65	0.67318	0.689655	0.704692	0.717045		0.1	0.1	0.1	0.1	0.1		1.65	0.979064	0.976271	0.973487	0.974811	0.983764
0.1	0.1	0.1	0.1			1.7	0.682759	0.697645	0.715454	0.723762		0.1	0.1	0.1	0.1	0.1		1.7	0.980911	0.978305	0.978246	0.978338	0.984366
0.1	0.1	0.1	0.1			1.75	0.690421	0.705214	0.718898	0.733837		0.1	0.1	0.1	0.1	0.1		1.75	0.981527	0.979661	0.978246	0.979849	0.985568
0.1	0.1	0.1	0.1			1.8	0.699234	0.712363	0.725355	0.741814		0.1	0.1	0.1	0.1	0.1		1.8	0.981527	0.981017	0.979606	0.981864	0.988575
0.1	0.1	0.1	0.1			1.85	0.706897	0.720353	0.734826	0.74895		0.1	0.1	0.1	0.1	0.1		1.85	0.983374	0.983051	0.980286	0.983879	0.99098
0.1	0.1	0.1	0.1			1.9	0.716475	0.728764	0.741713	0.755248		0.1	0.1	0.1	0.1	0.1		1.9	0.986453	0.985763	0.980286	0.98539	0.992784
0.1	0.1	0.1	0.1			1.95	0.723755	0.735071	0.749462	0.760285		0.1	0.1	0.1	0.1	0.1		1.95	0.987685	0.987797	0.980286	0.986398	0.992784
0.1	0.1	0.1	0.1			2	0.730268	0.744323	0.757641	0.767842		0.1	0.1	0.1	0.1	0.1		2	0.9883	0.990508	0.983005	0.988413	0.993987
0.1	0.1	0.1	0.1			2.05	0.74023	0.751051	0.761946	0.77372		0.1	0.1	0.1	0.1	0.1		2.05	0.989532	0.992542	0.983685	0.990428	0.994588
0.1	0.1	0.1	0.1			2.1	0.74751	0.755257	0.767111	0.781696		0.1	0.1	0.1	0.1	0.1		2.1	0.990148	0.992542	0.985044	0.991436	0.995189
0.1	0.1	0.1	0.1			2.15	0.755556	0.761985	0.772708	0.787993		0.1	0.1	0.1	0.1	0.1		2.15	0.990148	0.99322	0.986404	0.99194	0.995791
0.1	0.1	0.1	0.1			2.2	0.761686	0.769554	0.778304	0.79471		0.1	0.1	0.1	0.1	0.1		2.2	0.990148	0.993898	0.987084	0.992443	0.995791
0.1	0.1	0.1	0.1			2.25	0.769349	0.776283	0.782178	0.801847		0.1	0.1	0.1	0.1	0.1		2.25	0.993227	0.994576	0.987084	0.993451	0.995791
0.1	0.1	0.1	0.1			2.3	0.777011	0.78217	0.787774	0.808984		0.1	0.1	0.1	0.1	0.1		2.3	0.993227	0.994576	0.987763	0.993451	0.995791
0.1	0.1	0.1	0.1			2.35	0.781226	0.786375	0.79294	0.813182		0.1	0.1	0.1	0.1	0.1		2.35	0.993842	0.994576	0.989803	0.993451	0.995791
0.1	0.1	0.1	0.1			2.4	0.788889	0.791001	0.800689	0.81864		0.1	0.1	0.1	0.1	0.1		2.4	0.993842	0.995254	0.989803	0.993955	0.996392
0.1	0.1	0.1	0.1			2.45	0.792337	0.799832	0.808437	0.825357		0.1	0.1	0.1	0.1	0.1		2.45	0.993842	0.995254	0.989803	0.994458	0.996993
0.1	0.1	0.1	0.1			2.5	0.796552	0.805719	0.815755	0.831234		0.1	0.1	0.1	0.1	0.1		2.5	0.993842	0.995932	0.989803	0.994458	0.996993
0.1	0.1	0.1	0.1			2.55	0.801916	0.810345	0.82006	0.836692		0.1	0.1	0.1	0.1	0.1		2.55	0.993842	0.99661	0.989803	0.994962	0.996993
0.1	0.1	0.1	0.1			2.6	0.809195	0.812868	0.824365	0.839631		0.1	0.1	0.1	0.1	0.1		2.6	0.994458	0.99661	0.990483	0.995466	0.996993
0.1	0.1	0.1	0.1			2.65	0.811111	0.816653	0.827378	0.844249		0.1	0.1	0.1	0.1	0.1		2.65	0.99569	0.99661	0.991162	0.995466	0.998196
0.1	0.1	0.1	0.1			2.7	0.81341	0.820858	0.830392	0.848866		0.1	0.1	0.1	0.1	0.1		2.7	0.99569	0.99661	0.992522	0.995466	0.998797
0.1	0.1	0.1	0.1			2.75	0.818391	0.825904	0.832544	0.852225		0.1	0.1	0.1	0.1	0.1		2.75	0.996305	0.99661	0.992522	0.995466	0.998797
0.1	0.1	0.1	0.1			2.8	0.825287	0.83095	0.835127	0.856003		0.1	0.1	0.1	0.1	0.1		2.8	0.996921	0.99661	0.992522	0.996977	0.998797
0.1	0.1	0.1	0.1			2.85	0.831801	0.834735	0.837279	0.861041		0.1	0.1	0.1	0.1	0.1		2.85	0.996921	0.997288	0.992522	0.996977	0.998797
0.1	0.1	0.1	0.1			2.9	0.837165	0.83894	0.840723	0.865659		0.1	0.1	0.1	0.1	0.1		2.9	0.996921	0.997288	0.992522	0.997481	0.998797
0.1	0.1	0.1	0.1			2.95	0.842529	0.841043	0.842445	0.869018		0.1	0.1	0.1	0.1	0.1		2.95	0.996921	0.997288	0.992522	0.997481	0.998797
0.1	0.1	0.1	0.1			3	0.845211	0.845248	0.846319	0.871537		0.1	0.1	0.1	0.1	0.1		3	0.996921	0.997288	0.992522	0.997481	0.999399
0.1	0.1	0.1	0.1			3.05	0.849042	0.84651	0.851055	0.875735		0.1	0.1	0.1	0.1	0.1		3.05	0.997537	0.998644	0.993202	0.997481	0.999399
0.1	0.1	0.1	0.1			3.1	0.85249	0.847771	0.854068	0.880353		0.1	0.1	0.1	0.1	0.1		3.1	0.997537	0.998644	0.993202	0.997481	0.999399
0.1	0.1	0.1	0.1			3.15	0.856322	0.849874	0.858803	0.883711		0.1	0.1	0.1	0.1	0.1		3.15	0.997537	0.998644	0.993202	0.997481	1
0.1	0.1	0.1	0.1			3.2	0.861303	0.852397	0.862247	0.884971		0.1	0.1	0.1	0.1	0.1		3.2	0.997537	0.998644	0.993202	0.997481
0.1	0.1	0.1	0.1			3.25	0.8659	0.857443	0.86526	0.88749		0.1	0.1	0.1	0.1	0.1		3.25	0.997537	0.998644	0.993202	0.997481
0.1	0.1	0.1	0.1			3.3	0.867816	0.862489	0.868704	0.891268		0.1	0.1	0.1	0.1	0.1		3.3	0.997537	0.998644	0.993882	0.997481
0.1	0.1	0.1	0.1			3.35	0.870115	0.864592	0.872579	0.892947		0.1	0.1	0.1	0.1	0.1		3.35	0.997537	0.998644	0.995241	0.997481
0.1	0.1	0.1	0.1			3.4	0.87318	0.867956	0.876453	0.896306		0.1	0.1	0.1	0.1	0.1		3.4	0.997537	0.998644	0.995241	0.997481
0.1	0.1	0.1	0.1			3.45	0.875862	0.8709	0.878605	0.897565		0.1	0.1	0.1	0.1	0.1		3.45	0.997537	0.998644	0.995921	0.997985
0.1	0.1	0.1	0.1			3.5	0.87931	0.874264	0.883341	0.900084		0.1	0.1	0.1	0.1	0.1		3.5	0.997537	0.998644	0.995921	0.997985
0.1	0.1	0.1	0.1			3.55	0.880843	0.876787	0.885062	0.901763		0.1	0.1	0.1	0.1	0.1		3.55	0.997537	0.998644	0.995921	0.997985
0.1	0.1	0.1	0.1			3.6	0.883142	0.880992	0.888076	0.904282		0.1	0.1	0.1	0.1	0.1		3.6	0.998153	0.998644	0.995921	0.997985
0.1	0.1	0.1	0.1			3.65	0.887356	0.883936	0.89195	0.906801		0.1	0.1	0.1	0.1	0.1		3.65	0.998768	0.998644	0.995921	0.997985
0.1	0.1	0.1	0.1			3.7	0.890038	0.885618	0.894533	0.9089		0.1	0.1	0.1	0.1	0.1		3.7	0.998768	0.999322	0.996601	0.997985
0.1	0.1	0.1	0.1			3.75	0.891571	0.88688	0.897116	0.910579		0.1	0.1	0.1	0.1	0.1		3.75	0.998768	0.999322	0.996601	0.998489
0.1	0.1	0.1	0.1			3.8	0.896552	0.888982	0.898838	0.913518		0.1	0.1	0.1	0.1	0.1		3.8	0.998768	0.999322	0.996601	0.998992
0.1	0.1	0.1	0.1			3.85	0.900383	0.891926	0.90056	0.914777		0.1	0.1	0.1	0.1	0.1		3.85	0.998768	0.999322	0.996601	0.998992
0.1	0.1	0.1	0.1			3.9	0.903448	0.895711	0.902282	0.916877		0.1	0.1	0.1	0.1	0.1		3.9	0.998768	0.999322	0.996601	0.998992
0.1	0.1	0.1	0.1			3.95	0.904215	0.898234	0.904864	0.917716		0.1	0.1	0.1	0.1	0.1		3.95	0.998768	0.999322	0.996601	0.999496
0.1	0.1	0.1	0.1			4	0.90728	0.900757	0.906156	0.920235		0.1	0.1	0.1	0.1	0.1		4	0.998768	1	0.996601	1
0.1	0.1	0.1	0.1			4.05	0.909579	0.901177	0.906586	0.921495		0.1	0.1	0.1	0.1	0.1		4.05	0.998768		0.996601
0.1	0.1	0.1	0.1			4.1	0.91341	0.90328	0.908308	0.924013		0.1	0.1	0.1	0.1	0.1		4.1	0.999384		0.996601
0.1	0.1	0.1	0.1			4.15	0.915709	0.904542	0.9096	0.926113		0.1	0.1	0.1	0.1	0.1		4.15	0.999384		0.996601
0.1	0.1	0.1	0.1			4.2	0.918008	0.906644	0.911322	0.927792		0.1	0.1	0.1	0.1	0.1		4.2	1		0.996601
0.1	0.1	0.1	0.1			4.25	0.919923	0.907906	0.912613	0.928631		0.1	0.1	0.1	0.1	0.1		4.25			0.996601
0.1	0.1	0.1	0.1			4.3	0.921456	0.91127	0.913043	0.928631		0.1	0.1	0.1	0.1	0.1		4.3			0.996601
0.1	0.1	0.1	0.1			4.35	0.92567	0.912111	0.913904	0.929471		0.1	0.1	0.1	0.1	0.1		4.35			0.996601
0.1	0.1	0.1	0.1			4.4	0.927586	0.912532	0.916057	0.93199		0.1	0.1	0.1	0.1	0.1		4.4			0.996601
0.1	0.1	0.1	0.1			4.45	0.929119	0.912952	0.917348	0.93199		0.1	0.1	0.1	0.1	0.1		4.45			0.996601
0.1	0.1	0.1	0.1			4.5	0.929119	0.915055	0.91907	0.933249		0.1	0.1	0.1	0.1	0.1		4.5			0.996601
0.1	0.1	0.1	0.1			4.55	0.931801	0.917157	0.920792	0.935768		0.1	0.1	0.1	0.1	0.1		4.55			0.996601
0.1	0.1	0.1	0.1			4.6	0.933716	0.91968	0.922514	0.937448		0.1	0.1	0.1	0.1	0.1		4.6			0.996601
0.1	0.1	0.1	0.1			4.65	0.934866	0.921362	0.923375	0.938707		0.1	0.1	0.1	0.1	0.1		4.65			0.997281
0.1	0.1	0.1	0.1			4.7	0.936015	0.923465	0.925097	0.939547		0.1	0.1	0.1	0.1	0.1		4.7			0.997281
0.1	0.1	0.1	0.1			4.75	0.938314	0.924727	0.925527	0.940386		0.1	0.1	0.1	0.1	0.1		4.75			0.997281
0.1	0.1	0.1	0.1			4.8	0.939847	0.925988	0.925527	0.941226		0.1	0.1	0.1	0.1	0.1		4.8			0.997281
0.1	0.1	0.1	0.1			4.85	0.941762	0.92725	0.92768	0.943325		0.1	0.1	0.1	0.1	0.1		4.85			0.997281
0.1	0.1	0.1	0.1			4.9	0.942529	0.928511	0.928541	0.943745		0.1	0.1	0.1	0.1	0.1		4.9			0.997281
0.1	0.1	0.1	0.1			4.95	0.943678	0.929773	0.930263	0.945424		0.1	0.1	0.1	0.1	0.1		4.95			0.997281
0.1	0.1	0.1	0.1			5	0.945977	0.930193	0.930693	0.946683		0.1	0.1	0.1	0.1	0.1		5			0.997961
0.1	0.1	0.1	0.1			5.05	0.948276	0.931034	0.933276	0.947103		0.1	0.1	0.1	0.1	0.1		5.05			0.997961
0.1	0.1	0.1	0.1			5.1	0.949425	0.931876	0.933706	0.948783		0.1	0.1	0.1	0.1	0.1		5.1			0.997961
0.1	0.1	0.1	0.1			5.15	0.950575	0.933137	0.934567	0.950042		0.1	0.1	0.1	0.1	0.1		5.15			0.997961
0.1	0.1	0.1	0.1			5.2	0.952874	0.933978	0.936289	0.952981		0.1	0.1	0.1	0.1	0.1		5.2			0.997961
0.1	0.1	0.1	0.1			5.25	0.95364	0.933978	0.938011	0.95424		0.1	0.1	0.1	0.1	0.1		5.25			0.997961
0.1	0.1	0.1	0.1			5.3	0.955556	0.934819	0.938011	0.9555		0.1	0.1	0.1	0.1	0.1		5.3			0.997961
0.1	0.1	0.1	0.1			5.35	0.956322	0.936081	0.939303	0.957599		0.1	0.1	0.1	0.1	0.1		5.35			0.997961
0.1	0.1	0.1	0.1			5.4	0.956705	0.937342	0.940164	0.958018		0.1	0.1	0.1	0.1	0.1		5.4			0.997961
0.1	0.1	0.1	0.1			5.45	0.957088	0.937342	0.940594	0.960537		0.1	0.1	0.1	0.1	0.1		5.45			0.99864
0.1	0.1	0.1	0.1			5.5	0.957854	0.939024	0.942316	0.960957		0.1	0.1	0.1	0.1	0.1		5.5			0.99864
0.1	0.1	0.1	0.1			5.55	0.958621	0.940706	0.943177	0.962217		0.1	0.1	0.1	0.1	0.1		5.55			0.99864
0.1	0.1	0.1	0.1			5.6	0.960536	0.941548	0.944038	0.963056		0.1	0.1	0.1	0.1	0.1		5.6			0.99864
0.1	0.1	0.1	0.1			5.65	0.961303	0.942389	0.944468	0.963476		0.1	0.1	0.1	0.1	0.1		5.65			0.99864
0.1	0.1	0.1	0.1			5.7	0.962069	0.94365	0.94619	0.964736		0.1	0.1	0.1	0.1	0.1		5.7			0.99864
0.1	0.1	0.1	0.1			5.75	0.962452	0.944491	0.947482	0.964736		0.1	0.1	0.1	0.1	0.1		5.75			0.99864
0.1	0.1	0.1	0.1			5.8	0.963602	0.945753	0.947912	0.965995		0.1	0.1	0.1	0.1	0.1		5.8			0.99864
0.1	0.1	0.1	0.1			5.85	0.964751	0.947014	0.948773	0.966835		0.1	0.1	0.1	0.1	0.1		5.85			0.99864
0.1	0.1	0.1	0.1			5.9	0.965517	0.947855	0.949204	0.967254		0.1	0.1	0.1	0.1	0.1		5.9			0.99864
0.1	0.1	0.1	0.1			5.95	0.9659	0.948276	0.950495	0.968094		0.1	0.1	0.1	0.1	0.1		5.95			0.99864
0.1	0.1	0.1	0.1			6	0.966284	0.949117	0.950926	0.968094		0.1	0.1	0.1	0.1	0.1		6			0.99864
0.1	0.1	0.1	0.1			6.05	0.967433	0.95122	0.952647	0.968514		0.1	0.1	0.1	0.1	0.1		6.05			0.99864
0.15	0.1	0.1	0.1			6.1	0.967816	0.952061	0.953078	0.969773		0.1	0.1	0.1	0.1	0.1		6.1			0.99864
0.15	0.1	0.1	0.1			6.15	0.967816	0.952902	0.953078	0.970613		0.1	0.1	0.1	0.1	0.1		6.15			0.99864
0.15	0.1	0.1	0.1			6.2	0.968199	0.953743	0.95523	0.971453		0.1	0.1	0.1	0.1	0.1		6.2			0.99864
0.15	0.1	0.1	0.1			6.25	0.968966	0.954584	0.956091	0.971872		0.1	0.1	0.1	0.1	0.1		6.25			0.99864
0.15	0.1	0.1	0.1			6.3	0.969732	0.956266	0.956091	0.972712		0.1	0.1	0.1	0.1	0.1		6.3			0.99932
0.15	0.1	0.1	0.1			6.35	0.969732	0.957527	0.958244	0.973132		0.1	0.1	0.1	0.1	0.1		6.35			0.99932
0.15	0.1	0.1	0.1			6.4	0.970115	0.958368	0.958674	0.974391		0.1	0.1	0.1	0.1	0.1		6.4			0.99932
0.15	0.1	0.1	0.1			6.45	0.970498	0.958368	0.959535	0.974811		0.1	0.1	0.1	0.1	0.1		6.45			0.99932
0.15	0.1	0.1	0.1			6.5	0.970881	0.958789	0.960827	0.974811		0.1	0.1	0.1	0.1	0.1		6.5			0.99932
0.15	0.1	0.1	0.1			6.55	0.972031	0.95963	0.960827	0.975231		0.1	0.1	0.1	0.1	0.1		6.55			0.99932
0.15	0.1	0.1	0.1			6.6	0.972414	0.960471	0.962118	0.975651		0.1	0.1	0.1	0.1	0.1		6.6			0.99932
0.15	0.1	0.1	0.1			6.65	0.972414	0.960471	0.962979	0.975651		0.1	0.1	0.1	0.1	0.1		6.65			0.99932
0.15	0.1	0.1	0.1			6.7	0.972414	0.960471	0.963409	0.976071		0.1	0.1	0.1	0.1	0.1		6.7			0.99932
0.15	0.1	0.1	0.1			6.75	0.972414	0.960892	0.96427	0.976071		0.1	0.1	0.1	0.1	0.1		6.75			0.99932
0.15	0.1	0.1	0.1			6.8	0.972797	0.960892	0.96427	0.97691		0.1	0.1	0.1	0.1	0.1		6.8			0.99932
0.15	0.1	0.1	0.1			6.85	0.97318	0.962994	0.964701	0.97691		0.1	0.1	0.1	0.1	0.1		6.85			0.99932
0.15	0.1	0.1	0.1			6.9	0.97318	0.964676	0.964701	0.97691		0.1	0.1	0.1	0.1	0.1		6.9			0.99932
0.15	0.1	0.1	0.1			6.95	0.97318	0.965517	0.966423	0.97691		0.1	0.1	0.1	0.1	0.1		6.95			0.99932
0.15	0.1	0.1	0.1			7	0.973563	0.965517	0.966423	0.97733		0.1	0.1	0.1	0.1	0.1		7			0.99932
0.15	0.1	0.1	0.1			7.05	0.974713	0.965517	0.966423	0.97733		0.1	0.1	0.1	0.1	0.1		7.05			0.99932
0.15	0.1	0.1	0.1			7.1	0.975862	0.965517	0.966853	0.97733		0.1	0.1	0.1	0.1	0.1		7.1			0.99932
0.15	0.1	0.1	0.1			7.15	0.976245	0.966779	0.966853	0.97775		0.1	0.1	0.1	0.1	0.1		7.15			0.99932
0.15	0.1	0.1	0.1			7.2	0.976628	0.966779	0.966853	0.97775		0.1	0.1	0.1	0.1	0.1		7.2			0.99932
0.15	0.1	0.1	0.1			7.25	0.977395	0.967199	0.967284	0.97775		0.1	0.1	0.1	0.1	0.1		7.25			0.99932
0.15	0.1	0.1	0.1			7.3	0.978161	0.967199	0.967714	0.97817		0.1	0.1	0.1	0.1	0.1		7.3			0.99932
0.15	0.1	0.1	0.1			7.35	0.978161	0.967199	0.968145	0.97817		0.1	0.1	0.1	0.1	0.1		7.35			0.99932
0.15	0.1	0.1	0.1			7.4	0.978161	0.96762	0.968575	0.97817		0.1	0.1	0.1	0.1	0.1		7.4			0.99932
0.15	0.1	0.1	0.1			7.45	0.978161	0.96804	0.969006	0.978589		0.1	0.1	0.1	0.1	0.1		7.45			0.99932
0.15	0.1	0.1	0.1			7.5	0.979693	0.968461	0.969867	0.978589		0.1	0.1	0.1	0.1	0.1		7.5			0.99932
0.15	0.1	0.1	0.1			7.55	0.980077	0.969302	0.970728	0.979429		0.1	0.1	0.1	0.1	0.1		7.55			0.99932
0.15	0.1	0.1	0.1			7.6	0.98046	0.969722	0.971588	0.979429		0.1	0.1	0.1	0.1	0.1		7.6			0.99932
0.15	0.1	0.1	0.1			7.65	0.981226	0.970143	0.971588	0.979429		0.1	0.1	0.1	0.1	0.1		7.65			0.99932
0.15	0.1	0.1	0.1			7.7	0.981992	0.970563	0.97288	0.979849		0.1	0.1	0.1	0.1	0.1		7.7			0.99932
0.15	0.1	0.1	0.1			7.75	0.982375	0.970563	0.973741	0.979849		0.1	0.1	0.1	0.1	0.1		7.75			0.99932
0.15	0.1	0.1	0.1			7.8	0.983142	0.971825	0.974602	0.980269		0.1	0.1	0.1	0.1	0.1		7.8			0.99932
0.15	0.1	0.1	0.1			7.85	0.983525	0.973507	0.975032	0.980269		0.1	0.1	0.1	0.1	0.1		7.85			1
0.15	0.1	0.1	0.1			7.9	0.983525	0.973928	0.975463	0.980269		0.1	0.1	0.1	0.1	0.1
0.15	0.1	0.1	0.1			7.95	0.983525	0.973928	0.975893	0.980269		0.1	0.1	0.1	0.1	0.1
0.15	0.1	0.1	0.1			8	0.984674	0.974769	0.975893	0.980269		0.1	0.1	0.1	0.1	0.1
0.15	0.1	0.1	0.1			8.05	0.985057	0.97561	0.976324	0.980269		0.1	0.1	0.1	0.1	0.1
0.15	0.1	0.1	0.1			8.1	0.985057	0.97561	0.976754	0.980688		0.1	0.1	0.1	0.1	0.1
0.15	0.1	0.1	0.1			8.15	0.985441	0.97561	0.976754	0.980688		0.1	0.1	0.1	0.1	0.1
0.15	0.1	0.1	0.1			8.2	0.985824	0.97603	0.977185	0.980688		0.1	0.1	0.1	0.1	0.1
0.15	0.1	0.1	0.1			8.25	0.986207	0.97603	0.977185	0.980688		0.1	0.1	0.1	0.1	0.1
0.15	0.1	0.1	0.1			8.3	0.986207	0.97603	0.977615	0.981108		0.1	0.1	0.1	0.1	0.1
0.15	0.1	0.1	0.1			8.35	0.987356	0.97603	0.977615	0.981528		0.1	0.1	0.1	0.1	0.1
0.15	0.1	0.1	0.1			8.4	0.987356	0.976451	0.978476	0.981528		0.1	0.1	0.1	0.1	0.1
0.15	0.1	0.1	0.1			8.45	0.987356	0.976451	0.978476	0.981528		0.1	0.1	0.1	0.1	0.1
0.15	0.1	0.1	0.1			8.5	0.987739	0.977292	0.978476	0.981948		0.1	0.1	0.1	0.1	0.1
0.15	0.1	0.1	0.1			8.55	0.987739	0.977712	0.978476	0.982368		0.1	0.1	0.1	0.1	0.1
0.15	0.1	0.1	0.1			8.6	0.987739	0.977712	0.979337	0.982368		0.1	0.1	0.1	0.1	0.1
0.15	0.1	0.1	0.1			8.65	0.987739	0.978553	0.980198	0.982788		0.1	0.1	0.1	0.1	0.1
0.15	0.1	0.1	0.1			8.7	0.987739	0.979394	0.980628	0.982788		0.1	0.1	0.1	0.1	0.1
0.15	0.1	0.1	0.1			8.75	0.987739	0.979394	0.981059	0.982788		0.1	0.1	0.1	0.1	0.1
0.15	0.1	0.1	0.1			8.8	0.987739	0.979815	0.981489	0.983207		0.1	0.1	0.1	0.1	0.1
0.15	0.1	0.1	0.1			8.85	0.987739	0.980235	0.982781	0.983627		0.1	0.1	0.1	0.1	0.1
0.15	0.1	0.1	0.1			8.9	0.987739	0.980656	0.982781	0.983627		0.1	0.1	0.1	0.1	0.1
0.15	0.1	0.1	0.1			8.95	0.987739	0.980656	0.982781	0.983627		0.1	0.1	0.1	0.1	0.1
0.15	0.1	0.1	0.1			9	0.987739	0.980656	0.982781	0.983627		0.1	0.1	0.1	0.1	0.1
0.15	0.1	0.1	0.1			9.05	0.987739	0.980656	0.983211	0.983627		0.1	0.1	0.1	0.1	0.1
0.15	0.1	0.1	0.1			9.1	0.987739	0.980656	0.983642	0.983627		0.1	0.1	0.1	0.1	0.1
0.15	0.1	0.1	0.1			9.15	0.988123	0.981077	0.983642	0.984047		0.1	0.1	0.1	0.1	0.1
0.15	0.1	0.1	0.1			9.2	0.988889	0.981077	0.983642	0.984467		0.1	0.1	0.1	0.1	0.1
0.15	0.1	0.1	0.1			9.25	0.988889	0.981077	0.983642	0.984467		0.1	0.1	0.1	0.1	0.1
0.15	0.1	0.1	0.1			9.3	0.989272	0.981077	0.984072	0.984887		0.1	0.1	0.1	0.1	0.1
0.15	0.1	0.1	0.1			9.35	0.989272	0.981077	0.984503	0.985306		0.1	0.1	0.1	0.1	0.1
0.15	0.1	0.1	0.1			9.4	0.989655	0.981077	0.984503	0.985726		0.1	0.1	0.1	0.1	0.1
0.15	0.1	0.1	0.1			9.45	0.989655	0.981077	0.985364	0.985726		0.1	0.1	0.1	0.1	0.1
0.15	0.15	0.1	0.1			9.5	0.989655	0.981918	0.985364	0.985726		0.1	0.1	0.1	0.1	0.1
0.15	0.15	0.1	0.1			9.55	0.989655	0.981918	0.985364	0.985726		0.1	0.1	0.1	0.1	0.1
0.15	0.15	0.1	0.1			9.6	0.989655	0.981918	0.985794	0.986566		0.1	0.1	0.1	0.1	0.1
0.15	0.15	0.1	0.1			9.65	0.990038	0.981918	0.985794	0.986566		0.1	0.1	0.1	0.1	0.1
0.15	0.15	0.1	0.1			9.7	0.990038	0.981918	0.985794	0.986566		0.1	0.1	0.1	0.1	0.1
0.15	0.15	0.1	0.1			9.75	0.990038	0.981918	0.985794	0.986566		0.1	0.1	0.1	0.1	0.1
0.15	0.15	0.1	0.1			9.8	0.990805	0.982338	0.986225	0.986566		0.1	0.1	0.1	0.1	0.1
0.15	0.15	0.1	0.1			9.85	0.990805	0.982759	0.986655	0.986566		0.1	0.1	0.1	0.1	0.1
0.15	0.15	0.1	0.1			9.9	0.990805	0.983179	0.986655	0.986986		0.1	0.1	0.1	0.1	0.1
0.15	0.15	0.1	0.1			9.95	0.990805	0.983179	0.986655	0.986986		0.1	0.1	0.1	0.1	0.1
0.15	0.15	0.1	0.1			10	0.990805	0.9836	0.986655	0.987406		0.1	0.1	0.1	0.1	0.1
0.15	0.15	0.1	0.1			10.05	0.990805	0.9836	0.987086	0.987406		0.1	0.1	0.1	0.1	0.1
0.15	0.15	0.1	0.1			10.1	0.991188	0.9836	0.987086	0.987406		0.1	0.1	0.1	0.1	0.1
0.15	0.15	0.1	0.1			10.15	0.991188	0.9836	0.987086	0.987406		0.1	0.1	0.1	0.1	0.1
0.15	0.15	0.1	0.1			10.2	0.991188	0.98402	0.987516	0.987406		0.1	0.1	0.1	0.1	0.1
0.15	0.15	0.1	0.1			10.25	0.991571	0.98402	0.987516	0.987825		0.1	0.1	0.1	0.1	0.1
0.15	0.15	0.15	0.1			10.3	0.991571	0.98402	0.987516	0.987825		0.1	0.1	0.1	0.1	0.1
0.15	0.15	0.15	0.1			10.35	0.991571	0.98402	0.987516	0.987825		0.1	0.1	0.1	0.1	0.1
0.15	0.15	0.15	0.1			10.4	0.991571	0.98402	0.987947	0.987825		0.1	0.1	0.1	0.1	0.1
0.15	0.15	0.15	0.1			10.45	0.991571	0.98402	0.987947	0.987825		0.15	0.1	0.1	0.1	0.1
0.15	0.15	0.15	0.1			10.5	0.991571	0.98402	0.988377	0.987825		0.15	0.1	0.1	0.1	0.1
0.15	0.15	0.15	0.1			10.55	0.991571	0.98402	0.988377	0.987825		0.15	0.1	0.1	0.1	0.1
0.15	0.15	0.15	0.1			10.6	0.991571	0.98402	0.988377	0.987825		0.15	0.1	0.1	0.1	0.1
0.15	0.15	0.15	0.1			10.65	0.991571	0.98402	0.988808	0.988245		0.15	0.1	0.1	0.1	0.1
0.15	0.15	0.15	0.1			10.7	0.991571	0.98402	0.989238	0.988245		0.15	0.15	0.1	0.1	0.1
0.15	0.15	0.15	0.15			10.75	0.991571	0.98402	0.989669	0.988245		0.15	0.15	0.1	0.1	0.1
0.2	0.15	0.15	0.15			10.8	0.991571	0.984441	0.989669	0.988245		0.15	0.15	0.1	0.1	0.1
0.2	0.15	0.15	0.15			10.85	0.991571	0.984861	0.989669	0.988245		0.15	0.15	0.1	0.1	0.1
0.2	0.15	0.15	0.15			10.9	0.991571	0.984861	0.989669	0.988245		0.15	0.15	0.1	0.1	0.1
0.2	0.15	0.15	0.15			10.95	0.991954	0.985702	0.989669	0.988245		0.15	0.15	0.1	0.1	0.1
0.2	0.15	0.15	0.15			11	0.991954	0.985702	0.989669	0.988245		0.15	0.15	0.1	0.1	0.1
0.2	0.15	0.15	0.15			11.05	0.991954	0.985702	0.989669	0.988245		0.15	0.15	0.1	0.1	0.1
0.2	0.15	0.15	0.15			11.1	0.991954	0.985702	0.989669	0.988665		0.15	0.15	0.1	0.1	0.1
0.2	0.15	0.15	0.15			11.15	0.991954	0.985702	0.990099	0.988665		0.15	0.15	0.1	0.1	0.1
0.2	0.15	0.15	0.15			11.2	0.991954	0.985702	0.990099	0.988665		0.15	0.15	0.1	0.1	0.1
0.2	0.15	0.15	0.15			11.25	0.992337	0.985702	0.990099	0.988665		0.15	0.15	0.1	0.1	0.1
0.2	0.15	0.15	0.15			11.3	0.992337	0.986123	0.990099	0.988665		0.15	0.15	0.1	0.1	0.1
0.2	0.15	0.15	0.15			11.35	0.992337	0.986543	0.990099	0.988665		0.15	0.15	0.1	0.1	0.1
0.2	0.15	0.15	0.15			11.4	0.992337	0.986543	0.990099	0.989505		0.15	0.15	0.1	0.1	0.1
0.2	0.15	0.15	0.15			11.45	0.992337	0.986964	0.990099	0.989505		0.15	0.15	0.1	0.1	0.1
0.2	0.15	0.15	0.15			11.5	0.992337	0.986964	0.990099	0.989505		0.15	0.15	0.15	0.1	0.1
0.2	0.15	0.15	0.15			11.55	0.992337	0.986964	0.990529	0.989505		0.15	0.15	0.15	0.1	0.1
0.2	0.15	0.15	0.15			11.6	0.992337	0.986964	0.990529	0.989505		0.15	0.15	0.15	0.1	0.1
0.2	0.15	0.15	0.15			11.65	0.99272	0.986964	0.99096	0.989505		0.15	0.15	0.15	0.1	0.1
0.2	0.15	0.15	0.15			11.7	0.99272	0.986964	0.99139	0.989505		0.15	0.15	0.15	0.1	0.1
0.2	0.15	0.15	0.15			11.75	0.99272	0.986964	0.99139	0.989505		0.15	0.15	0.15	0.1	0.1
0.2	0.15	0.15	0.15			11.8	0.99272	0.986964	0.99139	0.989924		0.15	0.15	0.15	0.1	0.1
0.2	0.15	0.15	0.15			11.85	0.99272	0.986964	0.99139	0.989924		0.15	0.15	0.15	0.1	0.1
0.2	0.15	0.15	0.15			11.9	0.99272	0.986964	0.99139	0.989924		0.15	0.15	0.15	0.1	0.1
0.2	0.15	0.15	0.15			11.95	0.99272	0.987384	0.99139	0.989924		0.15	0.15	0.15	0.1	0.1
0.2	0.15	0.15	0.15			12	0.99272	0.987384	0.99139	0.989924		0.15	0.15	0.15	0.1	0.1
0.2	0.15	0.15	0.15			12.05	0.99272	0.988225	0.991821	0.990344		0.15	0.15	0.15	0.1	0.1
0.2	0.15	0.15	0.15			12.1	0.99272	0.988646	0.991821	0.990344		0.15	0.15	0.15	0.1	0.1
0.2	0.15	0.15	0.15			12.15	0.993103	0.989066	0.991821	0.990344		0.15	0.15	0.15	0.1	0.1
0.2	0.15	0.15	0.15			12.2	0.993103	0.989066	0.991821	0.990344		0.15	0.15	0.15	0.1	0.1
0.2	0.15	0.15	0.15			12.25	0.993103	0.989066	0.991821	0.990764		0.15	0.15	0.15	0.1	0.1
0.2	0.15	0.15	0.15			12.3	0.993103	0.989066	0.991821	0.990764		0.15	0.15	0.15	0.1	0.1
0.2	0.15	0.15	0.15			12.35	0.993103	0.989487	0.991821	0.991184		0.15	0.15	0.15	0.1	0.1
0.2	0.15	0.15	0.15			12.4	0.993103	0.989907	0.991821	0.991184		0.15	0.15	0.15	0.1	0.1
0.2	0.15	0.15	0.15			12.45	0.993103	0.989907	0.991821	0.991184		0.15	0.15	0.15	0.1	0.1
0.2	0.15	0.15	0.15			12.5	0.993103	0.990328	0.991821	0.991184		0.15	0.15	0.15	0.1	0.1
0.2	0.15	0.15	0.15			12.55	0.993103	0.990749	0.992251	0.991184		0.15	0.15	0.15	0.1	0.1
0.2	0.15	0.15	0.15			12.6	0.993487	0.990749	0.992682	0.991184		0.15	0.15	0.15	0.1	0.1
0.2	0.15	0.15	0.15			12.65	0.993487	0.990749	0.993112	0.991184		0.15	0.15	0.15	0.1	0.1
0.2	0.15	0.15	0.15			12.7	0.993487	0.990749	0.993112	0.991184		0.15	0.15	0.15	0.1	0.1
0.2	0.15	0.15	0.15			12.75	0.993487	0.990749	0.993112	0.991184		0.15	0.15	0.15	0.1	0.1
0.2	0.15	0.15	0.15			12.8	0.993487	0.990749	0.993543	0.991184		0.15	0.15	0.15	0.1	0.1
0.2	0.15	0.15	0.15			12.85	0.993487	0.990749	0.993543	0.991184		0.15	0.15	0.15	0.1	0.1
0.2	0.15	0.15	0.15			12.9	0.993487	0.990749	0.993543	0.991184		0.15	0.15	0.15	0.1	0.1
0.2	0.15	0.15	0.15			12.95	0.99387	0.990749	0.993543	0.991604		0.15	0.15	0.15	0.1	0.1
0.2	0.15	0.15	0.15			13	0.994253	0.990749	0.993543	0.991604		0.15	0.15	0.15	0.1	0.1
0.2	0.15	0.15	0.15			13.05	0.994636	0.990749	0.993543	0.991604		0.15	0.15	0.15	0.1	0.1
0.2	0.15	0.15	0.15			13.1	0.994636	0.99159	0.993543	0.992024		0.15	0.15	0.15	0.1	0.1
0.2	0.15	0.15	0.15			13.15	0.994636	0.99159	0.993543	0.992024		0.15	0.15	0.15	0.1	0.1
0.2	0.15	0.15	0.15			13.2	0.994636	0.99159	0.993543	0.992024		0.15	0.15	0.15	0.1	0.1
0.2	0.15	0.15	0.15			13.25	0.994636	0.99201	0.993543	0.992024		0.15	0.15	0.15	0.1	0.1
0.2	0.15	0.15	0.15			13.3	0.994636	0.992431	0.993543	0.992024		0.15	0.15	0.15	0.1	0.1
0.2	0.15	0.15	0.15			13.35	0.994636	0.992431	0.993543	0.992024		0.15	0.15	0.15	0.1	0.1
0.2	0.15	0.15	0.15			13.4	0.994636	0.992431	0.993543	0.992443		0.15	0.15	0.15	0.1	0.1
0.2	0.15	0.15	0.15			13.45	0.994636	0.992851	0.993543	0.992443		0.15	0.15	0.15	0.1	0.1
0.2	0.15	0.15	0.15			13.5	0.995019	0.992851	0.993543	0.992443		0.15	0.15	0.15	0.1	0.1
0.2	0.15	0.15	0.15			13.55	0.995019	0.992851	0.993543	0.992443		0.15	0.15	0.15	0.1	0.1
0.2	0.15	0.15	0.15			13.6	0.995019	0.992851	0.993543	0.992443		0.15	0.15	0.15	0.1	0.1
0.2	0.15	0.15	0.15			13.65	0.995019	0.992851	0.993543	0.992443		0.15	0.15	0.15	0.1	0.1
0.2	0.15	0.15	0.15			13.7	0.995019	0.992851	0.993543	0.992443		0.15	0.15	0.15	0.1	0.1
0.2	0.15	0.15	0.15			13.75	0.995402	0.992851	0.993543	0.992443		0.15	0.15	0.15	0.1	0.15
0.2	0.15	0.15	0.15			13.8	0.995402	0.993272	0.993543	0.992443		0.15	0.15	0.15	0.1	0.15
0.2	0.15	0.15	0.15			13.85	0.995402	0.993272	0.993543	0.992863		0.15	0.15	0.15	0.1	0.15
0.2	0.15	0.15	0.15			13.9	0.995402	0.993272	0.993543	0.992863		0.15	0.15	0.15	0.1	0.15
0.2	0.15	0.15	0.15			13.95	0.995402	0.993692	0.993543	0.992863		0.15	0.15	0.15	0.1	0.15
0.2	0.15	0.15	0.15			14	0.995402	0.993692	0.993973	0.992863		0.15	0.15	0.15	0.1	0.15
0.2	0.15	0.15	0.15			14.05	0.995402	0.993692	0.993973	0.992863		0.15	0.15	0.15	0.1	0.15
0.2	0.15	0.15	0.15			14.1	0.995402	0.993692	0.993973	0.992863		0.15	0.15	0.15	0.1	0.15
0.2	0.15	0.15	0.15			14.15	0.995402	0.993692	0.993973	0.992863		0.15	0.15	0.15	0.1	0.15
0.2	0.15	0.15	0.15			14.2	0.995402	0.993692	0.993973	0.992863		0.15	0.15	0.15	0.1	0.15
0.2	0.15	0.15	0.15			14.25	0.995402	0.993692	0.994404	0.992863		0.15	0.15	0.15	0.1	0.15
0.2	0.15	0.15	0.15			14.3	0.995402	0.993692	0.994404	0.992863		0.15	0.15	0.15	0.1	0.15
0.2	0.15	0.15	0.15			14.35	0.995785	0.994113	0.994404	0.993283		0.15	0.15	0.15	0.1	0.15
0.2	0.15	0.15	0.15			14.4	0.995785	0.994113	0.994404	0.993283		0.15	0.15	0.15	0.1	0.15
0.2	0.15	0.15	0.15			14.45	0.995785	0.994533	0.994404	0.993283		0.15	0.15	0.15	0.1	0.15
0.2	0.15	0.15	0.15			14.5	0.995785	0.994533	0.994404	0.993283		0.15	0.15	0.15	0.1	0.15
0.2	0.15	0.15	0.15			14.55	0.995785	0.994533	0.994404	0.993283		0.15	0.15	0.15	0.1	0.15
0.2	0.15	0.15	0.15			14.6	0.995785	0.994533	0.994404	0.993283		0.15	0.15	0.15	0.1	0.15
0.2	0.15	0.15	0.15			14.65	0.995785	0.994533	0.994834	0.993283		0.15	0.15	0.15	0.1	0.15
0.2	0.15	0.15	0.15			14.7	0.995785	0.994954	0.994834	0.993283		0.15	0.15	0.15	0.1	0.15
0.2	0.15	0.15	0.15			14.75	0.995785	0.994954	0.994834	0.993283		0.15	0.15	0.15	0.1	0.15
0.2	0.15	0.15	0.15			14.8	0.995785	0.994954	0.994834	0.993283		0.15	0.15	0.15	0.1	0.15
0.2	0.15	0.15	0.15			14.85	0.995785	0.995374	0.995265	0.993283		0.15	0.15	0.15	0.1	0.15
0.25	0.15	0.15	0.15			14.9	0.995785	0.995374	0.995265	0.993283		0.15	0.15	0.15	0.1	0.15
0.25	0.15	0.15	0.15			14.95	0.995785	0.995374	0.995265	0.993283		0.15	0.15	0.15	0.1	0.15
0.25	0.15	0.15	0.15			15	0.995785	0.995795	0.995695	0.993283		0.15	0.15	0.15	0.1	0.15
0.25	0.15	0.15	0.15			15.05	0.995785	0.995795	0.995695	0.993283		0.15	0.15	0.15	0.1	0.15
0.25	0.15	0.15	0.15			15.1	0.995785	0.995795	0.996126	0.993283		0.15	0.15	0.15	0.1	0.15
0.25	0.15	0.15	0.15			15.15	0.996169	0.995795	0.996126	0.993703		0.15	0.15	0.15	0.1	0.15
0.25	0.15	0.15	0.15			15.2	0.996169	0.995795	0.996126	0.993703		0.15	0.15	0.15	0.1	0.15
0.25	0.15	0.15	0.15			15.25	0.996169	0.996215	0.996126	0.993703		0.15	0.15	0.15	0.1	0.15
0.25	0.15	0.15	0.15			15.3	0.996169	0.996215	0.996126	0.993703		0.15	0.15	0.15	0.1	0.15
0.25	0.15	0.15	0.15			15.35	0.996169	0.996215	0.996126	0.993703		0.15	0.15	0.15	0.1	0.15
0.25	0.15	0.15	0.15			15.4	0.996169	0.996215	0.996126	0.993703		0.15	0.15	0.15	0.1	0.15
0.25	0.15	0.15	0.15			15.45	0.996169	0.996215	0.996126	0.993703		0.15	0.15	0.15	0.1	0.15
0.25	0.15	0.15	0.15			15.5	0.996169	0.996215	0.996126	0.993703		0.15	0.15	0.15	0.1	0.15
0.25	0.15	0.15	0.15			15.55	0.996552	0.996215	0.996126	0.993703		0.15	0.15	0.15	0.1	0.15
0.25	0.15	0.15	0.15			15.6	0.996552	0.996215	0.996126	0.994123		0.15	0.15	0.15	0.1	0.15
0.25	0.15	0.15	0.15			15.65	0.996552	0.996215	0.996126	0.994123		0.15	0.15	0.15	0.1	0.15
0.25	0.15	0.15	0.15			15.7	0.996552	0.996215	0.996126	0.994123		0.15	0.15	0.15	0.1	0.15
0.25	0.15	0.15	0.15			15.75	0.996552	0.996215	0.996126	0.994123		0.15	0.15	0.15	0.1	0.15
0.25	0.15	0.2	0.15			15.8	0.996552	0.997056	0.996126	0.994123		0.15	0.15	0.15	0.1	0.15
0.25	0.15	0.2	0.15			15.85	0.996552	0.997056	0.996126	0.994123		0.15	0.15	0.15	0.1	0.15
0.25	0.15	0.2	0.15			15.9	0.996552	0.997056	0.996126	0.994123		0.15	0.15	0.15	0.1	0.15
0.25	0.15	0.2	0.15			15.95	0.996935	0.997477	0.996126	0.994123		0.15	0.15	0.15	0.1	0.15
0.25	0.15	0.2	0.15			16	0.997318	0.997477	0.996126	0.994123		0.15	0.15	0.15	0.1	0.15
0.25	0.15	0.2	0.15			16.05	0.997318	0.997477	0.996126	0.994542		0.15	0.15	0.15	0.1	0.15
0.25	0.15	0.2	0.15			16.1	0.997318	0.997477	0.996126	0.994542		0.15	0.15	0.15	0.1	0.15
0.25	0.15	0.2	0.15			16.15	0.997318	0.997477	0.996126	0.994542		0.15	0.15	0.15	0.1	0.15
0.25	0.15	0.2	0.15			16.2	0.997318	0.997477	0.996126	0.994542		0.15	0.15	0.15	0.1	0.15
0.25	0.15	0.2	0.15			16.25	0.997318	0.997477	0.996556	0.994542		0.15	0.15	0.15	0.1	0.15
0.25	0.15	0.2	0.15			16.3	0.997318	0.997477	0.996556	0.994962		0.15	0.15	0.15	0.1	0.15
0.25	0.15	0.2	0.15			16.35	0.997701	0.997477	0.996556	0.994962		0.15	0.15	0.15	0.1	0.15
0.25	0.15	0.2	0.15			16.4	0.997701	0.997477	0.996556	0.994962		0.15	0.15	0.15	0.1	0.15
0.25	0.15	0.2	0.15			16.45	0.997701	0.997477	0.996556	0.994962		0.15	0.15	0.15	0.1	0.15
0.25	0.15	0.2	0.15			16.5	0.997701	0.997477	0.996556	0.994962		0.15	0.15	0.15	0.15	0.15
0.25	0.15	0.2	0.15			16.55	0.997701	0.997477	0.996987	0.994962		0.15	0.15	0.15	0.15	0.15
0.25	0.15	0.2	0.15			16.6	0.997701	0.997477	0.996987	0.994962		0.15	0.15	0.15	0.15	0.15
0.25	0.15	0.2	0.15			16.65	0.997701	0.997477	0.996987	0.995382		0.15	0.15	0.15	0.15	0.15
0.25	0.15	0.2	0.15			16.7	0.997701	0.997477	0.996987	0.995382		0.15	0.15	0.15	0.15	0.15
0.25	0.15	0.2	0.15			16.75	0.997701	0.997477	0.996987	0.995382		0.15	0.15	0.15	0.15	0.15
0.25	0.15	0.2	0.15			16.8	0.997701	0.997477	0.996987	0.995382		0.15	0.15	0.15	0.15	0.15
0.25	0.15	0.2	0.15			16.85	0.997701	0.997477	0.996987	0.995382		0.15	0.15	0.15	0.15	0.15
0.25	0.15	0.2	0.15			16.9	0.997701	0.997477	0.996987	0.995382		0.15	0.15	0.15	0.15	0.15
0.25	0.2	0.2	0.15			16.95	0.997701	0.997477	0.997417	0.995382		0.15	0.15	0.15	0.15	0.15
0.25	0.2	0.2	0.15			17	0.997701	0.997477	0.997417	0.995382		0.15	0.15	0.15	0.15	0.15
0.25	0.2	0.2	0.15			17.05	0.997701	0.997897	0.997848	0.995382		0.15	0.15	0.15	0.15	0.15
0.25	0.2	0.2	0.15			17.1	0.997701	0.997897	0.997848	0.995382		0.15	0.15	0.15	0.15	0.15
0.25	0.2	0.2	0.15			17.15	0.998084	0.997897	0.997848	0.995382		0.15	0.15	0.15	0.15	0.15
0.25	0.2	0.2	0.15			17.2	0.998084	0.997897	0.997848	0.995382		0.15	0.15	0.15	0.15	0.15
0.25	0.2	0.2	0.15			17.25	0.998084	0.997897	0.997848	0.995382		0.15	0.15	0.15	0.15	0.15
0.25	0.2	0.2	0.15			17.3	0.998084	0.997897	0.997848	0.995802		0.15	0.15	0.15	0.15	0.15
0.25	0.2	0.2	0.15			17.35	0.998084	0.998318	0.997848	0.995802		0.15	0.15	0.15	0.15	0.15
0.25	0.2	0.2	0.15			17.4	0.998084	0.999579	0.997848	0.996222		0.15	0.15	0.15	0.15	0.15
0.25	0.2	0.2	0.15			17.45	0.998084	0.999579	0.997848	0.996222		0.15	0.15	0.15	0.15	0.15
0.25	0.2	0.2	0.15			17.5	0.998084	0.999579	0.997848	0.996222		0.15	0.15	0.15	0.15	0.15
0.25	0.2	0.2	0.15			17.55	0.998084	0.999579	0.997848	0.996222		0.15	0.15	0.15	0.15	0.15
0.25	0.2	0.2	0.15			17.6	0.998467	0.999579	0.997848	0.996641		0.15	0.15	0.15	0.15	0.15
0.25	0.2	0.2	0.15			17.65	0.998467	0.999579	0.997848	0.996641		0.15	0.15	0.15	0.15	0.15
0.25	0.2	0.2	0.15			17.7	0.998467	0.999579	0.997848	0.996641		0.15	0.15	0.15	0.15	0.15
0.25	0.2	0.2	0.15			17.75	0.998467	0.999579	0.997848	0.996641		0.15	0.15	0.15	0.15	0.15
0.25	0.2	0.2	0.15			17.8	0.998467	0.999579	0.997848	0.996641		0.15	0.15	0.15	0.15	0.15
0.25	0.2	0.2	0.15			17.85	0.998467	0.999579	0.997848	0.996641		0.15	0.15	0.15	0.15	0.15
0.25	0.2	0.2	0.15			17.9	0.998851	0.999579	0.997848	0.996641		0.15	0.15	0.15	0.15	0.15
0.25	0.2	0.2	0.15			17.95	0.998851	0.999579	0.997848	0.997061		0.15	0.15	0.15	0.15	0.15
0.25	0.2	0.2	0.15			18	0.999234	0.999579	0.997848	0.997061		0.15	0.15	0.15	0.15	0.15
0.25	0.2	0.2	0.15			18.05	0.999234	0.999579	0.997848	0.997061		0.15	0.15	0.15	0.15	0.15
0.25	0.2	0.2	0.15			18.1	0.999234	0.999579	0.997848	0.997061		0.15	0.15	0.15	0.15	0.15
0.25	0.2	0.2	0.15			18.15	0.999234	0.999579	0.997848	0.997061		0.15	0.15	0.15	0.15	0.15
0.25	0.2	0.2	0.15			18.2	0.999234	0.999579	0.997848	0.997061		0.15	0.15	0.15	0.15	0.15
0.25	0.2	0.2	0.15			18.25	0.999234	0.999579	0.997848	0.997061		0.15	0.15	0.15	0.15	0.15
0.25	0.2	0.2	0.15			18.3	0.999234	0.999579	0.997848	0.997061		0.15	0.15	0.15	0.15	0.15
0.25	0.2	0.2	0.2			18.35	0.999617	0.999579	0.997848	0.997061		0.15	0.15	0.15	0.15	0.15
0.25	0.2	0.2	0.2			18.4	0.999617	0.999579	0.997848	0.997061		0.15	0.15	0.15	0.15	0.15
0.25	0.2	0.2	0.2			18.45	0.999617	0.999579	0.997848	0.997061		0.15	0.15	0.15	0.15	0.15
0.25	0.2	0.2	0.2			18.5	0.999617	0.999579	0.997848	0.997481		0.15	0.15	0.15	0.15	0.15
0.25	0.2	0.2	0.2			18.55	1	0.999579	0.997848	0.997481		0.15	0.15	0.15	0.15	0.15
0.25	0.2	0.2	0.2			18.6		0.999579	0.997848	0.997901		0.15	0.15	0.15	0.15	0.15
0.25	0.2	0.2	0.2			18.65		1	0.997848	0.997901		0.15	0.15	0.15	0.15	0.15
0.25	0.2	0.2	0.2			18.7			0.997848	0.998321		0.15	0.15	0.15	0.15	0.15
0.25	0.2	0.2	0.2			18.75			0.997848	0.998321		0.15	0.15	0.15	0.15	0.15
0.25	0.2	0.2	0.2			18.8			0.997848	0.998321		0.15	0.15	0.15	0.15	0.15
0.25	0.2	0.2	0.2			18.85			0.997848	0.998321		0.15	0.15	0.15	0.15	0.15
0.25	0.2	0.2	0.2			18.9			0.997848	0.998321		0.15	0.15	0.15	0.15	0.15
0.25	0.2	0.2	0.2			18.95			0.997848	0.998321		0.15	0.15	0.15	0.15	0.15
0.25	0.2	0.2	0.2			19			0.997848	0.998321		0.15	0.15	0.15	0.15	0.15
0.25	0.2	0.2	0.2			19.05			0.997848	0.998321		0.15	0.15	0.15	0.15	0.15
0.25	0.2	0.2	0.2			19.1			0.997848	0.998321		0.15	0.15	0.15	0.15	0.15
0.25	0.2	0.2	0.2			19.15			0.997848	0.998321		0.2	0.15	0.15	0.15	0.15
0.25	0.2	0.2	0.2			19.2			0.997848	0.998321		0.2	0.15	0.15	0.15	0.15
0.25	0.2	0.2	0.2			19.25			0.997848	0.998321		0.2	0.15	0.2	0.15	0.15
0.25	0.2	0.2	0.2			19.3			0.997848	0.998321		0.2	0.15	0.2	0.15	0.15
0.25	0.2	0.2	0.2			19.35			0.997848	0.998321		0.2	0.15	0.2	0.15	0.15
0.25	0.2	0.2	0.2			19.4			0.997848	0.998321		0.2	0.15	0.2	0.15	0.15
0.25	0.2	0.2	0.2			19.45			0.997848	0.998321		0.2	0.15	0.2	0.15	0.15
0.25	0.2	0.2	0.2			19.5			0.997848	0.998321		0.2	0.2	0.2	0.15	0.15
0.25	0.2	0.2	0.2			19.55			0.997848	0.998321		0.2	0.2	0.2	0.15	0.15
0.25	0.2	0.2	0.2			19.6			0.997848	0.998321		0.2	0.2	0.2	0.15	0.15
0.25	0.2	0.2	0.2			19.65			0.997848	0.998321		0.2	0.2	0.2	0.15	0.15
0.25	0.2	0.2	0.2			19.7			0.997848	0.998321		0.2	0.2	0.2	0.15	0.15
0.3	0.2	0.2	0.2			19.75			0.997848	0.998321		0.2	0.2	0.2	0.15	0.15
0.3	0.2	0.2	0.2			19.8			0.997848	0.998321		0.2	0.2	0.2	0.15	0.15
0.3	0.2	0.2	0.2			19.85			0.998278	0.998321		0.2	0.2	0.2	0.15	0.15
0.3	0.2	0.2	0.2			19.9			0.998278	0.998321		0.2	0.2	0.2	0.15	0.15
0.3	0.2	0.2	0.2			19.95			0.998278	0.998321		0.2	0.2	0.2	0.15	0.15
0.3	0.2	0.2	0.2			20			0.998278	0.998321		0.2	0.2	0.2	0.15	0.15
0.3	0.2	0.2	0.2			20.05			0.998278	0.998321		0.2	0.2	0.2	0.15	0.15
0.3	0.2	0.2	0.2			20.1			0.998278	0.998321		0.2	0.2	0.2	0.15	0.15
0.3	0.2	0.2	0.2			20.15			0.998278	0.998321		0.2	0.2	0.2	0.15	0.15
0.3	0.2	0.2	0.2			20.2			0.998278	0.998321		0.2	0.2	0.2	0.15	0.15
0.3	0.2	0.2	0.2			20.25			0.998278	0.998321		0.2	0.2	0.2	0.15	0.15
0.3	0.2	0.2	0.2			20.3			0.998278	0.998321		0.2	0.2	0.2	0.15	0.15
0.3	0.2	0.2	0.2			20.35			0.998278	0.998321		0.2	0.2	0.2	0.15	0.15
0.3	0.2	0.2	0.2			20.4			0.998278	0.998321		0.2	0.2	0.2	0.15	0.15
0.3	0.2	0.2	0.2			20.45			0.998278	0.998321		0.2	0.2	0.2	0.15	0.15
0.3	0.2	0.2	0.2			20.5			0.998278	0.998321		0.2	0.2	0.2	0.15	0.15
0.3	0.2	0.2	0.2			20.55			0.998278	0.998321		0.2	0.2	0.2	0.15	0.15
0.3	0.2	0.2	0.2			20.6			0.998278	0.998321		0.2	0.2	0.2	0.15	0.15
0.3	0.2	0.2	0.2			20.65			0.998278	0.998321		0.2	0.2	0.2	0.15	0.15
0.3	0.2	0.2	0.2			20.7			0.998278	0.998321		0.2	0.2	0.2	0.15	0.15
0.3	0.2	0.2	0.2			20.75			0.998278	0.998321		0.2	0.2	0.2	0.15	0.15
0.3	0.2	0.2	0.2			20.8			0.998278	0.998321		0.2	0.2	0.2	0.15	0.15
0.3	0.2	0.2	0.2			20.85			0.998709	0.998321		0.2	0.2	0.2	0.15	0.15
0.3	0.2	0.2	0.2			20.9			0.998709	0.998321		0.2	0.2	0.2	0.15	0.15
0.3	0.2	0.2	0.2			20.95			0.998709	0.998321		0.2	0.2	0.2	0.15	0.15
0.3	0.2	0.2	0.2			21			0.998709	0.998321		0.2	0.2	0.2	0.15	0.15
0.3	0.2	0.2	0.2			21.05			0.998709	0.998321		0.2	0.2	0.2	0.15	0.15
0.3	0.2	0.2	0.2			21.1			0.998709	0.998321		0.2	0.2	0.2	0.15	0.15
0.3	0.2	0.2	0.2			21.15			0.998709	0.998321		0.2	0.2	0.2	0.15	0.15
0.3	0.2	0.25	0.2			21.2			0.998709	0.998321		0.2	0.2	0.2	0.15	0.15
0.3	0.2	0.25	0.2			21.25			0.998709	0.998321		0.2	0.2	0.2	0.15	0.15
0.3	0.2	0.25	0.2			21.3			0.998709	0.998321		0.2	0.2	0.2	0.15	0.15
0.3	0.2	0.25	0.2			21.35			0.998709	0.998321		0.2	0.2	0.2	0.15	0.15
0.3	0.2	0.25	0.2			21.4			0.998709	0.998321		0.2	0.2	0.2	0.15	0.15
0.3	0.2	0.25	0.2			21.45			0.998709	0.998321		0.2	0.2	0.2	0.15	0.15
0.3	0.2	0.25	0.2			21.5			0.998709	0.998321		0.2	0.2	0.2	0.15	0.15
0.3	0.2	0.25	0.2			21.55			0.998709	0.998321		0.2	0.2	0.2	0.15	0.15
0.3	0.2	0.25	0.2			21.6			0.998709	0.998321		0.2	0.2	0.2	0.15	0.15
0.3	0.2	0.25	0.2			21.65			0.998709	0.998321		0.2	0.2	0.2	0.15	0.15
0.3	0.2	0.25	0.2			21.7			0.998709	0.998321		0.2	0.2	0.2	0.15	0.15
0.3	0.2	0.25	0.2			21.75			0.998709	0.998321		0.2	0.2	0.2	0.15	0.15
0.3	0.2	0.25	0.2			21.8			0.998709	0.998321		0.2	0.2	0.2	0.15	0.15
0.3	0.2	0.25	0.2			21.85			0.998709	0.998321		0.2	0.2	0.2	0.15	0.15
0.3	0.2	0.25	0.2			21.9			0.998709	0.998321		0.2	0.2	0.2	0.15	0.15
0.3	0.2	0.25	0.2			21.95			0.998709	0.998321		0.2	0.2	0.2	0.15	0.15
0.3	0.2	0.25	0.2			22			0.998709	0.998741		0.2	0.2	0.2	0.15	0.15
0.3	0.2	0.25	0.2			22.05			0.998709	0.998741		0.2	0.2	0.2	0.15	0.15
0.3	0.2	0.25	0.2			22.1			0.998709	0.998741		0.2	0.2	0.2	0.15	0.15
0.3	0.2	0.25	0.2			22.15			0.998709	0.99916		0.2	0.2	0.2	0.15	0.15
0.3	0.2	0.25	0.2			22.2			0.998709	0.99916		0.2	0.2	0.2	0.15	0.15
0.3	0.2	0.25	0.2			22.25			0.998709	0.99916		0.2	0.2	0.2	0.15	0.15
0.3	0.25	0.25	0.2			22.3			0.998709	0.99916		0.2	0.2	0.2	0.15	0.15
0.3	0.25	0.25	0.2			22.35			0.998709	0.99916		0.2	0.2	0.2	0.15	0.15
0.3	0.25	0.25	0.2			22.4			0.998709	0.99958		0.2	0.2	0.2	0.15	0.15
0.3	0.25	0.25	0.2			22.45			0.998709	0.99958		0.2	0.2	0.2	0.15	0.15
0.3	0.25	0.25	0.2			22.5			0.998709	0.99958		0.2	0.2	0.2	0.15	0.15
0.3	0.25	0.25	0.2			22.55			0.999139	0.99958		0.2	0.2	0.2	0.15	0.15
0.3	0.25	0.25	0.2			22.6			0.999139	0.99958		0.2	0.2	0.2	0.15	0.15
0.3	0.25	0.25	0.2			22.65			0.999139	0.99958		0.2	0.2	0.2	0.15	0.15
0.3	0.25	0.25	0.2			22.7			0.999139	0.99958		0.2	0.2	0.2	0.15	0.15
0.3	0.25	0.25	0.2			22.75			0.999139	0.99958		0.2	0.2	0.2	0.15	0.15
0.3	0.25	0.25	0.2			22.8			0.999139	0.99958		0.2	0.2	0.2	0.15	0.15
0.3	0.25	0.25	0.2			22.85			0.999139	0.99958		0.2	0.2	0.2	0.15	0.15
0.3	0.25	0.25	0.2			22.9			0.999139	0.99958		0.2	0.2	0.2	0.15	0.15
0.3	0.25	0.25	0.2			22.95			0.999139	0.99958		0.2	0.2	0.2	0.15	0.15
0.3	0.25	0.25	0.2			23			0.999139	1		0.2	0.2	0.2	0.15	0.15
0.3	0.25	0.25	0.2			23.05			0.999139			0.2	0.2	0.2	0.15	0.15
0.3	0.25	0.25	0.2			23.1			0.999139			0.2	0.2	0.2	0.15	0.15
0.3	0.25	0.25	0.2			23.15			0.999139			0.2	0.2	0.2	0.15	0.15
0.3	0.25	0.25	0.2			23.2			0.999139			0.2	0.2	0.2	0.15	0.15
0.3	0.25	0.25	0.2			23.25			0.999139			0.2	0.2	0.2	0.15	0.15
0.3	0.25	0.25	0.2			23.3			0.999139			0.2	0.2	0.2	0.15	0.15
0.3	0.25	0.25	0.2			23.35			0.999139			0.2	0.2	0.2	0.15	0.15
0.3	0.25	0.25	0.2			23.4			0.999139			0.2	0.2	0.2	0.15	0.15
0.3	0.25	0.25	0.2			23.45			0.999139			0.2	0.2	0.2	0.15	0.15
0.3	0.25	0.25	0.2			23.5			0.999139			0.2	0.2	0.2	0.15	0.15
0.3	0.25	0.25	0.2			23.55			0.999139			0.2	0.2	0.2	0.15	0.15
0.3	0.25	0.25	0.2			23.6			0.999139			0.2	0.2	0.2	0.15	0.15
0.3	0.25	0.25	0.2			23.65			0.999139			0.2	0.2	0.2	0.15	0.15
0.3	0.25	0.25	0.2			23.7			0.999139			0.2	0.2	0.2	0.15	0.15
0.3	0.25	0.25	0.2			23.75			0.999139			0.2	0.2	0.2	0.15	0.15
0.3	0.25	0.25	0.2			23.8			0.99957			0.2	0.2	0.2	0.15	0.15
0.3	0.25	0.25	0.2			23.85			0.99957			0.2	0.2	0.2	0.15	0.15
0.3	0.25	0.25	0.2			23.9			0.99957			0.2	0.2	0.2	0.15	0.15
0.3	0.25	0.25	0.2			23.95			0.99957			0.2	0.2	0.2	0.15	0.15
0.3	0.25	0.25	0.2			24			0.99957			0.2	0.2	0.2	0.15	0.2
0.35	0.25	0.25	0.2			24.05			0.99957			0.2	0.2	0.2	0.15	0.2
0.35	0.25	0.25	0.2			24.1			0.99957			0.2	0.2	0.2	0.15	0.2
0.35	0.25	0.25	0.2			24.15			0.99957			0.2	0.2	0.2	0.15	0.2
0.35	0.25	0.25	0.25			24.2			0.99957			0.2	0.2	0.2	0.15	0.2
0.35	0.25	0.25	0.25			24.25			0.99957			0.2	0.2	0.2	0.15	0.2
0.35	0.25	0.25	0.25			24.3			1			0.2	0.2	0.2	0.15	0.2
0.35	0.25	0.25	0.25									0.2	0.2	0.2	0.15	0.2
0.35	0.25	0.25	0.25									0.2	0.2	0.2	0.15	0.2
0.35	0.25	0.25	0.25									0.2	0.2	0.2	0.15	0.2
0.35	0.25	0.25	0.25									0.2	0.2	0.2	0.15	0.2
0.35	0.25	0.25	0.25									0.2	0.2	0.2	0.15	0.2
0.35	0.25	0.25	0.25									0.2	0.2	0.2	0.15	0.2
0.35	0.25	0.25	0.25									0.2	0.2	0.2	0.15	0.2
0.35	0.25	0.25	0.25									0.2	0.2	0.2	0.15	0.2
0.35	0.25	0.25	0.25									0.2	0.2	0.2	0.15	0.2
0.35	0.25	0.25	0.25									0.2	0.2	0.2	0.15	0.2
0.35	0.25	0.25	0.25									0.2	0.2	0.2	0.15	0.2
0.35	0.25	0.25	0.25									0.2	0.2	0.2	0.15	0.2
0.35	0.25	0.25	0.25									0.2	0.2	0.2	0.15	0.2
0.35	0.25	0.25	0.25									0.2	0.2	0.2	0.15	0.2
0.35	0.25	0.25	0.25									0.2	0.2	0.2	0.15	0.2
0.35	0.25	0.25	0.25									0.2	0.2	0.2	0.15	0.2
0.35	0.25	0.25	0.25									0.2	0.2	0.2	0.15	0.2
0.35	0.25	0.25	0.25									0.2	0.2	0.2	0.15	0.2
0.35	0.25	0.25	0.25									0.2	0.2	0.2	0.15	0.2
0.35	0.25	0.25	0.25									0.2	0.2	0.2	0.15	0.2
0.35	0.25	0.25	0.25									0.2	0.2	0.2	0.15	0.2
0.35	0.25	0.25	0.25									0.2	0.2	0.2	0.15	0.2
0.35	0.25	0.25	0.25									0.2	0.2	0.2	0.15	0.2
0.35	0.25	0.25	0.25									0.2	0.2	0.2	0.15	0.2
0.35	0.25	0.25	0.25									0.2	0.2	0.2	0.15	0.2
0.35	0.25	0.25	0.25									0.2	0.2	0.2	0.15	0.2
0.35	0.25	0.25	0.25									0.2	0.2	0.2	0.15	0.2
0.35	0.25	0.25	0.25									0.2	0.2	0.2	0.15	0.2
0.35	0.25	0.25	0.25									0.2	0.2	0.2	0.15	0.2
0.35	0.25	0.25	0.25									0.2	0.2	0.2	0.15	0.2
0.35	0.25	0.25	0.25									0.2	0.2	0.2	0.15	0.2
0.35	0.25	0.25	0.25									0.2	0.2	0.2	0.15	0.2
0.35	0.25	0.3	0.25									0.2	0.2	0.2	0.15	0.2
0.35	0.25	0.3	0.25									0.2	0.2	0.2	0.15	0.2
0.35	0.25	0.3	0.25									0.2	0.2	0.2	0.15	0.2
0.35	0.25	0.3	0.25									0.2	0.2	0.2	0.15	0.2
0.35	0.25	0.3	0.25									0.2	0.2	0.2	0.15	0.2
0.35	0.25	0.3	0.25									0.2	0.2	0.2	0.15	0.2
0.35	0.25	0.3	0.25									0.2	0.2	0.2	0.15	0.2
0.35	0.25	0.3	0.25									0.2	0.2	0.2	0.15	0.2
0.35	0.25	0.3	0.25									0.2	0.2	0.2	0.15	0.2
0.35	0.25	0.3	0.25									0.2	0.2	0.2	0.15	0.2
0.35	0.25	0.3	0.25									0.2	0.2	0.2	0.15	0.2
0.35	0.25	0.3	0.25									0.2	0.2	0.2	0.15	0.2
0.35	0.25	0.3	0.25									0.2	0.2	0.2	0.15	0.2
0.35	0.25	0.3	0.25									0.2	0.2	0.2	0.15	0.2
0.35	0.25	0.3	0.25									0.2	0.2	0.2	0.15	0.2
0.35	0.25	0.3	0.25									0.2	0.2	0.2	0.15	0.2
0.35	0.25	0.3	0.25									0.2	0.2	0.2	0.15	0.2
0.35	0.25	0.3	0.25									0.2	0.25	0.2	0.15	0.2
0.35	0.25	0.3	0.25									0.2	0.25	0.2	0.15	0.2
0.35	0.25	0.3	0.25									0.2	0.25	0.2	0.15	0.2
0.35	0.25	0.3	0.25									0.2	0.25	0.2	0.15	0.2
0.35	0.25	0.3	0.25									0.2	0.25	0.2	0.15	0.2
0.35	0.25	0.3	0.25									0.2	0.25	0.2	0.15	0.2
0.35	0.25	0.3	0.25									0.2	0.25	0.2	0.15	0.2
0.35	0.25	0.3	0.25									0.2	0.25	0.25	0.15	0.2
0.35	0.25	0.3	0.25									0.2	0.25	0.25	0.15	0.2
0.35	0.25	0.3	0.25									0.2	0.25	0.25	0.15	0.2
0.35	0.3	0.3	0.25									0.25	0.25	0.25	0.15	0.2
0.35	0.3	0.3	0.25									0.25	0.25	0.25	0.15	0.2
0.35	0.3	0.3	0.25									0.25	0.25	0.25	0.15	0.2
0.35	0.3	0.3	0.25									0.25	0.25	0.25	0.15	0.2
0.35	0.3	0.3	0.25									0.25	0.25	0.25	0.15	0.2
0.35	0.3	0.3	0.25									0.25	0.25	0.25	0.15	0.2
0.35	0.3	0.3	0.25									0.25	0.25	0.25	0.15	0.2
0.35	0.3	0.3	0.25									0.25	0.25	0.25	0.15	0.2
0.35	0.3	0.3	0.25									0.25	0.25	0.25	0.15	0.2
0.35	0.3	0.3	0.25									0.25	0.25	0.25	0.15	0.2
0.35	0.3	0.3	0.25									0.25	0.25	0.25	0.2	0.2
0.35	0.3	0.3	0.25									0.25	0.25	0.25	0.2	0.2
0.35	0.3	0.3	0.25									0.25	0.25	0.25	0.2	0.2
0.35	0.3	0.3	0.25									0.25	0.25	0.25	0.2	0.2
0.35	0.3	0.3	0.25									0.25	0.25	0.25	0.2	0.2
0.35	0.3	0.3	0.25									0.25	0.25	0.25	0.2	0.2
0.35	0.3	0.3	0.25									0.25	0.25	0.25	0.2	0.2
0.35	0.3	0.3	0.25									0.25	0.25	0.25	0.2	0.2
0.35	0.3	0.3	0.25									0.25	0.25	0.25	0.2	0.2
0.35	0.3	0.3	0.25									0.25	0.25	0.25	0.2	0.2
0.4	0.3	0.3	0.25									0.25	0.25	0.25	0.2	0.2
0.4	0.3	0.3	0.25									0.25	0.25	0.25	0.2	0.2
0.4	0.3	0.3	0.25									0.25	0.25	0.25	0.2	0.2
0.4	0.3	0.3	0.25									0.25	0.25	0.25	0.2	0.2
0.4	0.3	0.3	0.25									0.25	0.25	0.25	0.2	0.2
0.4	0.3	0.3	0.25									0.25	0.25	0.25	0.2	0.2
0.4	0.3	0.3	0.25									0.25	0.25	0.25	0.2	0.2
0.4	0.3	0.3	0.25									0.25	0.25	0.25	0.2	0.2
0.4	0.3	0.3	0.25									0.25	0.25	0.25	0.2	0.2
0.4	0.3	0.3	0.25									0.25	0.25	0.25	0.2	0.2
0.4	0.3	0.3	0.25									0.25	0.25	0.25	0.2	0.2
0.4	0.3	0.3	0.25									0.25	0.25	0.25	0.2	0.2
0.4	0.3	0.3	0.25									0.25	0.25	0.25	0.2	0.2
0.4	0.3	0.3	0.25									0.25	0.25	0.25	0.2	0.2
0.4	0.3	0.3	0.25									0.25	0.25	0.25	0.2	0.2
0.4	0.3	0.3	0.25									0.25	0.25	0.25	0.2	0.2
0.4	0.3	0.3	0.25									0.25	0.25	0.25	0.2	0.2
0.4	0.3	0.3	0.25									0.25	0.25	0.25	0.2	0.2
0.4	0.3	0.3	0.25									0.25	0.25	0.25	0.2	0.2
0.4	0.3	0.3	0.25									0.25	0.25	0.25	0.2	0.2
0.4	0.3	0.3	0.25									0.25	0.25	0.25	0.2	0.2
0.4	0.3	0.3	0.25									0.25	0.25	0.25	0.2	0.2
0.4	0.3	0.3	0.25									0.25	0.25	0.25	0.2	0.2
0.4	0.3	0.3	0.25									0.25	0.25	0.25	0.2	0.2
0.4	0.3	0.3	0.3									0.25	0.25	0.25	0.2	0.2
0.4	0.3	0.3	0.3									0.25	0.25	0.25	0.2	0.2
0.4	0.3	0.3	0.3									0.25	0.25	0.25	0.2	0.2
0.4	0.3	0.3	0.3									0.25	0.25	0.25	0.2	0.2
0.4	0.3	0.3	0.3									0.25	0.25	0.25	0.2	0.2
0.4	0.3	0.3	0.3									0.25	0.25	0.25	0.2	0.2
0.4	0.3	0.3	0.3									0.25	0.25	0.25	0.2	0.2
0.4	0.3	0.3	0.3									0.25	0.25	0.25	0.2	0.2
0.4	0.3	0.3	0.3									0.25	0.25	0.25	0.2	0.2
0.4	0.3	0.3	0.3									0.25	0.25	0.25	0.2	0.2
0.4	0.3	0.3	0.3									0.25	0.25	0.25	0.2	0.2
0.4	0.3	0.3	0.3									0.25	0.25	0.25	0.2	0.2
0.4	0.3	0.3	0.3									0.25	0.25	0.25	0.2	0.2
0.4	0.3	0.3	0.3									0.25	0.25	0.25	0.2	0.2
0.4	0.3	0.3	0.3									0.25	0.25	0.25	0.2	0.2
0.4	0.3	0.3	0.3									0.25	0.25	0.25	0.2	0.2
0.4	0.3	0.3	0.3									0.25	0.25	0.25	0.2	0.2
0.4	0.3	0.3	0.3									0.25	0.25	0.25	0.2	0.2
0.4	0.3	0.3	0.3									0.25	0.25	0.25	0.2	0.2
0.4	0.3	0.35	0.3									0.25	0.25	0.25	0.2	0.2
0.4	0.3	0.35	0.3									0.25	0.25	0.25	0.2	0.2
0.4	0.3	0.35	0.3									0.25	0.25	0.25	0.2	0.2
0.4	0.3	0.35	0.3									0.25	0.25	0.25	0.2	0.2
0.4	0.3	0.35	0.3									0.25	0.25	0.25	0.2	0.2
0.4	0.3	0.35	0.3									0.25	0.25	0.25	0.2	0.2
0.4	0.3	0.35	0.3									0.25	0.25	0.25	0.2	0.2
0.4	0.3	0.35	0.3									0.25	0.25	0.25	0.2	0.2
0.4	0.3	0.35	0.3									0.25	0.25	0.25	0.2	0.2
0.4	0.3	0.35	0.3									0.25	0.25	0.25	0.2	0.2
0.4	0.3	0.35	0.3									0.25	0.25	0.25	0.2	0.2
0.4	0.3	0.35	0.3									0.25	0.25	0.25	0.2	0.2
0.4	0.3	0.35	0.3									0.25	0.25	0.25	0.2	0.2
0.4	0.3	0.35	0.3									0.25	0.25	0.25	0.2	0.2
0.4	0.3	0.35	0.3									0.25	0.25	0.25	0.2	0.2
0.4	0.3	0.35	0.3									0.25	0.25	0.25	0.2	0.2
0.4	0.35	0.35	0.3									0.25	0.25	0.25	0.2	0.2
0.4	0.35	0.35	0.3									0.25	0.25	0.25	0.2	0.2
0.4	0.35	0.35	0.3									0.25	0.25	0.25	0.2	0.2
0.4	0.35	0.35	0.3									0.25	0.25	0.25	0.2	0.2
0.4	0.35	0.35	0.3									0.25	0.25	0.25	0.2	0.2
0.4	0.35	0.35	0.3									0.25	0.25	0.25	0.2	0.2
0.4	0.35	0.35	0.3									0.25	0.25	0.25	0.2	0.2
0.4	0.35	0.35	0.3									0.25	0.25	0.25	0.2	0.2
0.4	0.35	0.35	0.3									0.25	0.25	0.25	0.2	0.2
0.4	0.35	0.35	0.3									0.25	0.25	0.25	0.2	0.2
0.4	0.35	0.35	0.3									0.25	0.25	0.25	0.2	0.2
0.4	0.35	0.35	0.3									0.25	0.25	0.25	0.2	0.2
0.4	0.35	0.35	0.3									0.25	0.25	0.25	0.2	0.2
0.4	0.35	0.35	0.3									0.25	0.25	0.25	0.2	0.2
0.4	0.35	0.35	0.3									0.25	0.25	0.25	0.2	0.2
0.4	0.35	0.35	0.3									0.25	0.25	0.25	0.2	0.2
0.4	0.35	0.35	0.3									0.25	0.25	0.25	0.2	0.2
0.4	0.35	0.35	0.3									0.25	0.25	0.25	0.2	0.2
0.4	0.35	0.35	0.3									0.25	0.25	0.25	0.2	0.2
0.4	0.35	0.35	0.3									0.25	0.25	0.25	0.2	0.2
0.4	0.35	0.35	0.3									0.25	0.25	0.25	0.2	0.2
0.4	0.35	0.35	0.3									0.25	0.25	0.25	0.2	0.2
0.4	0.35	0.35	0.3									0.25	0.25	0.25	0.2	0.2
0.4	0.35	0.35	0.3									0.25	0.25	0.25	0.2	0.2
0.4	0.35	0.35	0.3									0.25	0.25	0.25	0.2	0.2
0.4	0.35	0.35	0.3									0.25	0.25	0.25	0.2	0.2
0.45	0.35	0.35	0.3									0.25	0.25	0.25	0.2	0.25
0.45	0.35	0.35	0.3									0.25	0.25	0.25	0.2	0.25
0.45	0.35	0.35	0.3									0.25	0.25	0.25	0.2	0.25
0.45	0.35	0.35	0.3									0.25	0.25	0.25	0.2	0.25
0.45	0.35	0.35	0.3									0.25	0.25	0.25	0.2	0.25
0.45	0.35	0.35	0.3									0.25	0.25	0.25	0.2	0.25
0.45	0.35	0.35	0.3									0.25	0.25	0.25	0.2	0.25
0.45	0.35	0.35	0.3									0.25	0.25	0.25	0.2	0.25
0.45	0.35	0.35	0.3									0.25	0.25	0.25	0.2	0.25
0.45	0.35	0.35	0.3									0.25	0.25	0.25	0.2	0.25
0.45	0.35	0.35	0.3									0.25	0.25	0.25	0.2	0.25
0.45	0.35	0.35	0.3									0.25	0.25	0.25	0.2	0.25
0.45	0.35	0.35	0.3									0.25	0.25	0.25	0.2	0.25
0.45	0.35	0.35	0.3									0.25	0.25	0.25	0.2	0.25
0.45	0.35	0.35	0.3									0.25	0.25	0.25	0.2	0.25
0.45	0.35	0.35	0.3									0.25	0.3	0.25	0.2	0.25
0.45	0.35	0.35	0.3									0.25	0.3	0.25	0.2	0.25
0.45	0.35	0.35	0.3									0.25	0.3	0.25	0.2	0.25
0.45	0.35	0.35	0.3									0.25	0.3	0.25	0.2	0.25
0.45	0.35	0.35	0.3									0.25	0.3	0.3	0.2	0.25
0.45	0.35	0.35	0.3									0.3	0.3	0.3	0.2	0.25
0.45	0.35	0.35	0.3									0.3	0.3	0.3	0.2	0.25
0.45	0.35	0.35	0.3									0.3	0.3	0.3	0.2	0.25
0.45	0.35	0.35	0.3									0.3	0.3	0.3	0.2	0.25
0.45	0.35	0.35	0.3									0.3	0.3	0.3	0.2	0.25
0.45	0.35	0.35	0.3									0.3	0.3	0.3	0.2	0.25
0.45	0.35	0.35	0.35									0.3	0.3	0.3	0.2	0.25
0.45	0.35	0.4	0.35									0.3	0.3	0.3	0.2	0.25
0.45	0.35	0.4	0.35									0.3	0.3	0.3	0.2	0.25
0.45	0.35	0.4	0.35									0.3	0.3	0.3	0.2	0.25
0.45	0.35	0.4	0.35									0.3	0.3	0.3	0.2	0.25
0.45	0.35	0.4	0.35									0.3	0.3	0.3	0.2	0.25
0.45	0.35	0.4	0.35									0.3	0.3	0.3	0.2	0.25
0.45	0.35	0.4	0.35									0.3	0.3	0.3	0.2	0.25
0.45	0.35	0.4	0.35									0.3	0.3	0.3	0.2	0.25
0.45	0.35	0.4	0.35									0.3	0.3	0.3	0.2	0.25
0.45	0.35	0.4	0.35									0.3	0.3	0.3	0.2	0.25
0.45	0.35	0.4	0.35									0.3	0.3	0.3	0.2	0.25
0.45	0.35	0.4	0.35									0.3	0.3	0.3	0.2	0.25
0.45	0.35	0.4	0.35									0.3	0.3	0.3	0.2	0.25
0.45	0.35	0.4	0.35									0.3	0.3	0.3	0.2	0.25
0.45	0.35	0.4	0.35									0.3	0.3	0.3	0.2	0.25
0.45	0.35	0.4	0.35									0.3	0.3	0.3	0.2	0.25
0.45	0.35	0.4	0.35									0.3	0.3	0.3	0.2	0.25
0.45	0.35	0.4	0.35									0.3	0.3	0.3	0.2	0.25
0.45	0.35	0.4	0.35									0.3	0.3	0.3	0.2	0.25
0.45	0.35	0.4	0.35									0.3	0.3	0.3	0.2	0.25
0.45	0.4	0.4	0.35									0.3	0.3	0.3	0.2	0.25
0.45	0.4	0.4	0.35									0.3	0.3	0.3	0.2	0.25
0.45	0.4	0.4	0.35									0.3	0.3	0.3	0.2	0.25
0.45	0.4	0.4	0.35									0.3	0.3	0.3	0.2	0.25
0.45	0.4	0.4	0.35									0.3	0.3	0.3	0.2	0.25
0.45	0.4	0.4	0.35									0.3	0.3	0.3	0.2	0.25
0.45	0.4	0.4	0.35									0.3	0.3	0.3	0.2	0.25
0.45	0.4	0.4	0.35									0.3	0.3	0.3	0.2	0.25
0.45	0.4	0.4	0.35									0.3	0.3	0.3	0.2	0.25
0.45	0.4	0.4	0.35									0.3	0.3	0.3	0.2	0.25
0.45	0.4	0.4	0.35									0.3	0.3	0.3	0.2	0.25
0.45	0.4	0.4	0.35									0.3	0.3	0.3	0.2	0.25
0.45	0.4	0.4	0.35									0.3	0.3	0.3	0.2	0.25
0.45	0.4	0.4	0.35									0.3	0.3	0.3	0.2	0.25
0.45	0.4	0.4	0.35									0.3	0.3	0.3	0.2	0.25
0.45	0.4	0.4	0.35									0.3	0.3	0.3	0.2	0.25
0.45	0.4	0.4	0.35									0.3	0.3	0.3	0.2	0.25
0.45	0.4	0.4	0.35									0.3	0.3	0.3	0.2	0.25
0.45	0.4	0.4	0.35									0.3	0.3	0.3	0.2	0.25
0.45	0.4	0.4	0.35									0.3	0.3	0.3	0.2	0.25
0.45	0.4	0.4	0.35									0.3	0.3	0.3	0.2	0.25
0.5	0.4	0.4	0.35									0.3	0.3	0.3	0.2	0.25
0.5	0.4	0.4	0.35									0.3	0.3	0.3	0.2	0.25
0.5	0.4	0.4	0.35									0.3	0.3	0.3	0.2	0.25
0.5	0.4	0.4	0.35									0.3	0.3	0.3	0.2	0.25
0.5	0.4	0.4	0.35									0.3	0.3	0.3	0.2	0.25
0.5	0.4	0.4	0.35									0.3	0.3	0.3	0.2	0.25
0.5	0.4	0.4	0.35									0.3	0.3	0.3	0.2	0.25
0.5	0.4	0.4	0.35									0.3	0.3	0.3	0.2	0.25
0.5	0.4	0.4	0.35									0.3	0.3	0.3	0.2	0.25
0.5	0.4	0.4	0.35									0.3	0.3	0.3	0.2	0.25
0.5	0.4	0.4	0.35									0.3	0.3	0.3	0.2	0.25
0.5	0.4	0.4	0.35									0.3	0.3	0.3	0.2	0.25
0.5	0.4	0.4	0.35									0.3	0.3	0.3	0.2	0.25
0.5	0.4	0.4	0.35									0.3	0.3	0.3	0.2	0.25
0.5	0.4	0.4	0.35									0.3	0.3	0.3	0.2	0.25
0.5	0.4	0.4	0.35									0.3	0.3	0.3	0.2	0.25
0.5	0.4	0.4	0.35									0.3	0.3	0.3	0.2	0.25
0.5	0.4	0.4	0.35									0.3	0.3	0.3	0.2	0.25
0.5	0.4	0.4	0.35									0.3	0.3	0.3	0.2	0.25
0.5	0.4	0.4	0.35									0.3	0.3	0.3	0.2	0.25
0.5	0.4	0.4	0.35									0.3	0.3	0.3	0.2	0.25
0.5	0.4	0.4	0.35									0.3	0.3	0.3	0.2	0.25
0.5	0.4	0.4	0.35									0.3	0.3	0.3	0.2	0.25
0.5	0.4	0.4	0.35									0.3	0.3	0.3	0.2	0.25
0.5	0.4	0.4	0.35									0.3	0.3	0.3	0.2	0.25
0.5	0.4	0.4	0.35									0.3	0.3	0.3	0.2	0.25
0.5	0.4	0.4	0.35									0.3	0.3	0.3	0.2	0.25
0.5	0.4	0.4	0.35									0.3	0.3	0.3	0.2	0.25
0.5	0.4	0.4	0.35									0.3	0.3	0.3	0.2	0.25
0.5	0.4	0.4	0.35									0.3	0.3	0.3	0.2	0.25
0.5	0.4	0.4	0.35									0.3	0.3	0.3	0.2	0.25
0.5	0.4	0.4	0.35									0.3	0.3	0.3	0.2	0.25
0.5	0.4	0.4	0.35									0.3	0.3	0.3	0.2	0.25
0.5	0.4	0.4	0.35									0.3	0.3	0.3	0.2	0.25
0.5	0.4	0.4	0.35									0.3	0.3	0.3	0.2	0.25
0.5	0.4	0.4	0.35									0.3	0.3	0.3	0.2	0.25
0.5	0.4	0.4	0.35									0.3	0.3	0.3	0.2	0.25
0.5	0.4	0.4	0.35									0.3	0.3	0.35	0.2	0.25
0.5	0.4	0.4	0.35									0.3	0.3	0.35	0.2	0.25
0.5	0.4	0.45	0.35									0.3	0.3	0.35	0.2	0.25
0.5	0.4	0.45	0.35									0.3	0.3	0.35	0.2	0.25
0.5	0.4	0.45	0.35									0.3	0.3	0.35	0.2	0.25
0.5	0.4	0.45	0.35									0.3	0.3	0.35	0.2	0.25
0.5	0.4	0.45	0.35									0.3	0.3	0.35	0.25	0.25
0.5	0.4	0.45	0.35									0.3	0.3	0.35	0.25	0.25
0.5	0.4	0.45	0.35									0.3	0.3	0.35	0.25	0.25
0.5	0.4	0.45	0.4									0.3	0.3	0.35	0.25	0.25
0.5	0.4	0.45	0.4									0.3	0.35	0.35	0.25	0.25
0.5	0.4	0.45	0.4									0.3	0.35	0.35	0.25	0.25
0.5	0.4	0.45	0.4									0.3	0.35	0.35	0.25	0.25
0.5	0.4	0.45	0.4									0.3	0.35	0.35	0.25	0.25
0.5	0.4	0.45	0.4									0.3	0.35	0.35	0.25	0.25
0.5	0.4	0.45	0.4									0.3	0.35	0.35	0.25	0.25
0.5	0.4	0.45	0.4									0.3	0.35	0.35	0.25	0.25
0.5	0.4	0.45	0.4									0.3	0.35	0.35	0.25	0.25
0.5	0.4	0.45	0.4									0.3	0.35	0.35	0.25	0.25
0.5	0.45	0.45	0.4									0.3	0.35	0.35	0.25	0.25
0.5	0.45	0.45	0.4									0.3	0.35	0.35	0.25	0.25
0.5	0.45	0.45	0.4									0.3	0.35	0.35	0.25	0.25
0.5	0.45	0.45	0.4									0.3	0.35	0.35	0.25	0.25
0.5	0.45	0.45	0.4									0.3	0.35	0.35	0.25	0.3
0.5	0.45	0.45	0.4									0.3	0.35	0.35	0.25	0.3
0.5	0.45	0.45	0.4									0.3	0.35	0.35	0.25	0.3
0.5	0.45	0.45	0.4									0.3	0.35	0.35	0.25	0.3
0.5	0.45	0.45	0.4									0.3	0.35	0.35	0.25	0.3
0.5	0.45	0.45	0.4									0.3	0.35	0.35	0.25	0.3
0.5	0.45	0.45	0.4									0.3	0.35	0.35	0.25	0.3
0.5	0.45	0.45	0.4									0.3	0.35	0.35	0.25	0.3
0.55	0.45	0.45	0.4									0.3	0.35	0.35	0.25	0.3
0.55	0.45	0.45	0.4									0.3	0.35	0.35	0.25	0.3
0.55	0.45	0.45	0.4									0.3	0.35	0.35	0.25	0.3
0.55	0.45	0.45	0.4									0.3	0.35	0.35	0.25	0.3
0.55	0.45	0.45	0.4									0.3	0.35	0.35	0.25	0.3
0.55	0.45	0.45	0.4									0.3	0.35	0.35	0.25	0.3
0.55	0.45	0.45	0.4									0.3	0.35	0.35	0.25	0.3
0.55	0.45	0.45	0.4									0.35	0.35	0.35	0.25	0.3
0.55	0.45	0.45	0.4									0.35	0.35	0.35	0.25	0.3
0.55	0.45	0.45	0.4									0.35	0.35	0.35	0.25	0.3
0.55	0.45	0.45	0.4									0.35	0.35	0.35	0.25	0.3
0.55	0.45	0.45	0.4									0.35	0.35	0.35	0.25	0.3
0.55	0.45	0.45	0.4									0.35	0.35	0.35	0.25	0.3
0.55	0.45	0.45	0.4									0.35	0.35	0.35	0.25	0.3
0.55	0.45	0.45	0.4									0.35	0.35	0.35	0.25	0.3
0.55	0.45	0.45	0.4									0.35	0.35	0.35	0.25	0.3
0.55	0.45	0.45	0.4									0.35	0.35	0.35	0.25	0.3
0.55	0.45	0.45	0.4									0.35	0.35	0.35	0.25	0.3
0.55	0.45	0.45	0.4									0.35	0.35	0.35	0.25	0.3
0.55	0.45	0.45	0.4									0.35	0.35	0.35	0.25	0.3
0.55	0.45	0.45	0.4									0.35	0.35	0.35	0.25	0.3
0.55	0.45	0.45	0.4									0.35	0.35	0.35	0.25	0.3
0.55	0.45	0.45	0.4									0.35	0.35	0.35	0.25	0.3
0.55	0.45	0.45	0.4									0.35	0.35	0.35	0.25	0.3
0.55	0.45	0.45	0.4									0.35	0.35	0.35	0.25	0.3
0.55	0.45	0.45	0.4									0.35	0.35	0.35	0.25	0.3
0.55	0.45	0.45	0.4									0.35	0.35	0.35	0.25	0.3
0.55	0.45	0.45	0.4									0.35	0.35	0.35	0.25	0.3
0.55	0.45	0.45	0.4									0.35	0.35	0.35	0.25	0.3
0.55	0.45	0.45	0.4									0.35	0.35	0.35	0.25	0.3
0.55	0.45	0.45	0.4									0.35	0.35	0.35	0.25	0.3
0.55	0.45	0.45	0.4									0.35	0.35	0.35	0.25	0.3
0.55	0.45	0.45	0.4									0.35	0.35	0.35	0.25	0.3
0.55	0.45	0.45	0.4									0.35	0.35	0.35	0.25	0.3
0.55	0.45	0.45	0.4									0.35	0.35	0.35	0.25	0.3
0.55	0.45	0.45	0.4									0.35	0.35	0.35	0.25	0.3
0.55	0.45	0.45	0.4									0.35	0.35	0.35	0.25	0.3
0.55	0.45	0.45	0.4									0.35	0.35	0.35	0.25	0.3
0.55	0.45	0.45	0.4									0.35	0.35	0.35	0.25	0.3
0.55	0.45	0.45	0.4									0.35	0.35	0.35	0.25	0.3
0.55	0.45	0.45	0.4									0.35	0.35	0.35	0.25	0.3
0.55	0.45	0.5	0.4									0.35	0.35	0.35	0.25	0.3
0.55	0.45	0.5	0.4									0.35	0.35	0.35	0.25	0.3
0.55	0.45	0.5	0.4									0.35	0.35	0.35	0.25	0.3
0.55	0.45	0.5	0.4									0.35	0.35	0.35	0.25	0.3
0.55	0.5	0.5	0.4									0.35	0.35	0.35	0.25	0.3
0.55	0.5	0.5	0.4									0.35	0.35	0.35	0.25	0.3
0.55	0.5	0.5	0.4									0.35	0.35	0.35	0.25	0.3
0.55	0.5	0.5	0.4									0.35	0.35	0.35	0.25	0.3
0.55	0.5	0.5	0.4									0.35	0.35	0.35	0.25	0.3
0.55	0.5	0.5	0.4									0.35	0.35	0.4	0.25	0.3
0.55	0.5	0.5	0.4									0.35	0.35	0.4	0.25	0.3
0.55	0.5	0.5	0.4									0.35	0.35	0.4	0.25	0.3
0.55	0.5	0.5	0.4									0.35	0.35	0.4	0.25	0.3
0.55	0.5	0.5	0.4									0.35	0.35	0.4	0.25	0.3
0.55	0.5	0.5	0.4									0.35	0.35	0.4	0.25	0.3
0.55	0.5	0.5	0.4									0.35	0.35	0.4	0.25	0.3
0.55	0.5	0.5	0.45									0.35	0.35	0.4	0.25	0.3
0.55	0.5	0.5	0.45									0.35	0.35	0.4	0.25	0.3
0.55	0.5	0.5	0.45									0.35	0.35	0.4	0.25	0.3
0.55	0.5	0.5	0.45									0.35	0.35	0.4	0.25	0.3
0.55	0.5	0.5	0.45									0.35	0.35	0.4	0.25	0.3
0.55	0.5	0.5	0.45									0.35	0.35	0.4	0.25	0.3
0.55	0.5	0.5	0.45									0.35	0.35	0.4	0.25	0.3
0.55	0.5	0.5	0.45									0.35	0.4	0.4	0.25	0.3
0.55	0.5	0.5	0.45									0.35	0.4	0.4	0.25	0.3
0.55	0.5	0.5	0.45									0.35	0.4	0.4	0.25	0.3
0.55	0.5	0.5	0.45									0.35	0.4	0.4	0.25	0.3
0.55	0.5	0.5	0.45									0.35	0.4	0.4	0.25	0.3
0.55	0.5	0.5	0.45									0.35	0.4	0.4	0.25	0.3
0.55	0.5	0.5	0.45									0.35	0.4	0.4	0.25	0.3
0.55	0.5	0.5	0.45									0.35	0.4	0.4	0.25	0.3
0.55	0.5	0.5	0.45									0.35	0.4	0.4	0.25	0.3
0.55	0.5	0.5	0.45									0.35	0.4	0.4	0.25	0.3
0.55	0.5	0.5	0.45									0.35	0.4	0.4	0.25	0.3
0.55	0.5	0.5	0.45									0.35	0.4	0.4	0.25	0.3
0.55	0.5	0.5	0.45									0.35	0.4	0.4	0.25	0.3
0.55	0.5	0.5	0.45									0.35	0.4	0.4	0.25	0.3
0.55	0.5	0.5	0.45									0.35	0.4	0.4	0.25	0.3
0.55	0.5	0.5	0.45									0.35	0.4	0.4	0.25	0.3
0.6	0.5	0.5	0.45									0.35	0.4	0.4	0.25	0.3
0.6	0.5	0.5	0.45									0.35	0.4	0.4	0.25	0.3
0.6	0.5	0.5	0.45									0.35	0.4	0.4	0.25	0.3
0.6	0.5	0.5	0.45									0.35	0.4	0.4	0.25	0.3
0.6	0.5	0.5	0.45									0.35	0.4	0.4	0.25	0.3
0.6	0.5	0.5	0.45									0.35	0.4	0.4	0.25	0.3
0.6	0.5	0.5	0.45									0.35	0.4	0.4	0.25	0.3
0.6	0.5	0.5	0.45									0.35	0.4	0.4	0.25	0.3
0.6	0.5	0.5	0.45									0.35	0.4	0.4	0.25	0.3
0.6	0.5	0.5	0.45									0.35	0.4	0.4	0.25	0.3
0.6	0.5	0.5	0.45									0.35	0.4	0.4	0.25	0.3
0.6	0.5	0.5	0.45									0.35	0.4	0.4	0.25	0.3
0.6	0.5	0.5	0.45									0.35	0.4	0.4	0.25	0.3
0.6	0.5	0.5	0.45									0.35	0.4	0.4	0.25	0.3
0.6	0.5	0.5	0.45									0.35	0.4	0.4	0.25	0.3
0.6	0.5	0.5	0.45									0.35	0.4	0.4	0.25	0.3
0.6	0.5	0.5	0.45									0.35	0.4	0.4	0.25	0.3
0.6	0.5	0.5	0.45									0.35	0.4	0.4	0.25	0.3
0.6	0.5	0.5	0.45									0.35	0.4	0.4	0.25	0.3
0.6	0.5	0.5	0.45									0.35	0.4	0.4	0.25	0.3
0.6	0.55	0.5	0.45									0.35	0.4	0.4	0.25	0.3
0.6	0.55	0.5	0.45									0.35	0.4	0.4	0.25	0.3
0.6	0.55	0.5	0.45									0.35	0.4	0.4	0.25	0.3
0.6	0.55	0.5	0.45									0.35	0.4	0.4	0.25	0.3
0.6	0.55	0.5	0.45									0.35	0.4	0.4	0.25	0.3
0.6	0.55	0.5	0.45									0.35	0.4	0.4	0.25	0.3
0.6	0.55	0.5	0.45									0.35	0.4	0.4	0.25	0.3
0.6	0.55	0.5	0.45									0.35	0.4	0.4	0.25	0.3
0.6	0.55	0.5	0.45									0.35	0.4	0.4	0.25	0.35
0.6	0.55	0.5	0.45									0.35	0.4	0.4	0.25	0.35
0.6	0.55	0.5	0.45									0.35	0.4	0.4	0.25	0.35
0.6	0.55	0.5	0.5									0.35	0.4	0.4	0.25	0.35
0.6	0.55	0.5	0.5									0.35	0.4	0.4	0.25	0.35
0.6	0.55	0.55	0.5									0.35	0.4	0.4	0.25	0.35
0.6	0.55	0.55	0.5									0.35	0.4	0.4	0.25	0.35
0.6	0.55	0.55	0.5									0.35	0.4	0.4	0.25	0.35
0.6	0.55	0.55	0.5									0.35	0.4	0.4	0.25	0.35
0.6	0.55	0.55	0.5									0.35	0.4	0.4	0.25	0.35
0.6	0.55	0.55	0.5									0.35	0.4	0.4	0.25	0.35
0.6	0.55	0.55	0.5									0.4	0.4	0.4	0.25	0.35
0.6	0.55	0.55	0.5									0.4	0.4	0.4	0.25	0.35
0.6	0.55	0.55	0.5									0.4	0.4	0.45	0.25	0.35
0.6	0.55	0.55	0.5									0.4	0.4	0.45	0.25	0.35
0.6	0.55	0.55	0.5									0.4	0.4	0.45	0.25	0.35
0.6	0.55	0.55	0.5									0.4	0.4	0.45	0.25	0.35
0.6	0.55	0.55	0.5									0.4	0.4	0.45	0.25	0.35
0.6	0.55	0.55	0.5									0.4	0.4	0.45	0.25	0.35
0.6	0.55	0.55	0.5									0.4	0.4	0.45	0.25	0.35
0.6	0.55	0.55	0.5									0.4	0.4	0.45	0.25	0.35
0.6	0.55	0.55	0.5									0.4	0.4	0.45	0.25	0.35
0.6	0.55	0.55	0.5									0.4	0.4	0.45	0.25	0.35
0.6	0.55	0.55	0.5									0.4	0.4	0.45	0.25	0.35
0.6	0.55	0.55	0.5									0.4	0.4	0.45	0.25	0.35
0.6	0.55	0.55	0.5									0.4	0.4	0.45	0.25	0.35
0.6	0.55	0.55	0.5									0.4	0.4	0.45	0.25	0.35
0.6	0.55	0.55	0.5									0.4	0.4	0.45	0.25	0.35
0.6	0.55	0.55	0.5									0.4	0.4	0.45	0.25	0.35
0.6	0.55	0.55	0.5									0.4	0.4	0.45	0.25	0.35
0.6	0.55	0.55	0.5									0.4	0.4	0.45	0.25	0.35
0.6	0.55	0.55	0.5									0.4	0.4	0.45	0.25	0.35
0.6	0.55	0.55	0.5									0.4	0.4	0.45	0.25	0.35
0.6	0.55	0.55	0.5									0.4	0.4	0.45	0.25	0.35
0.6	0.55	0.55	0.5									0.4	0.4	0.45	0.25	0.35
0.6	0.55	0.55	0.5									0.4	0.45	0.45	0.25	0.35
0.6	0.55	0.55	0.5									0.4	0.45	0.45	0.25	0.35
0.6	0.55	0.55	0.5									0.4	0.45	0.45	0.25	0.35
0.6	0.55	0.55	0.5									0.4	0.45	0.45	0.25	0.35
0.6	0.55	0.55	0.5									0.4	0.45	0.45	0.25	0.35
0.6	0.55	0.55	0.5									0.4	0.45	0.45	0.25	0.35
0.65	0.55	0.55	0.5									0.4	0.45	0.45	0.25	0.35
0.65	0.55	0.55	0.5									0.4	0.45	0.45	0.25	0.35
0.65	0.55	0.55	0.5									0.4	0.45	0.45	0.25	0.35
0.65	0.6	0.55	0.5									0.4	0.45	0.45	0.25	0.35
0.65	0.6	0.55	0.5									0.4	0.45	0.45	0.25	0.35
0.65	0.6	0.55	0.5									0.4	0.45	0.45	0.25	0.35
0.65	0.6	0.55	0.5									0.4	0.45	0.45	0.25	0.35
0.65	0.6	0.55	0.5									0.4	0.45	0.45	0.25	0.35
0.65	0.6	0.55	0.5									0.4	0.45	0.45	0.25	0.35
0.65	0.6	0.55	0.5									0.4	0.45	0.45	0.25	0.35
0.65	0.6	0.55	0.5									0.4	0.45	0.45	0.25	0.35
0.65	0.6	0.55	0.5									0.4	0.45	0.45	0.25	0.35
0.65	0.6	0.55	0.5									0.4	0.45	0.45	0.25	0.35
0.65	0.6	0.55	0.5									0.4	0.45	0.45	0.25	0.35
0.65	0.6	0.55	0.5									0.4	0.45	0.45	0.25	0.35
0.65	0.6	0.55	0.5									0.4	0.45	0.45	0.25	0.35
0.65	0.6	0.55	0.5									0.4	0.45	0.45	0.3	0.35
0.65	0.6	0.55	0.5									0.4	0.45	0.45	0.3	0.35
0.65	0.6	0.55	0.5									0.4	0.45	0.45	0.3	0.35
0.65	0.6	0.55	0.5									0.4	0.45	0.45	0.3	0.35
0.65	0.6	0.55	0.5									0.4	0.45	0.45	0.3	0.35
0.65	0.6	0.55	0.5									0.4	0.45	0.45	0.3	0.35
0.65	0.6	0.55	0.5									0.4	0.45	0.45	0.3	0.35
0.65	0.6	0.6	0.5									0.4	0.45	0.45	0.3	0.35
0.65	0.6	0.6	0.5									0.4	0.45	0.5	0.3	0.35
0.65	0.6	0.6	0.5									0.4	0.45	0.5	0.3	0.35
0.65	0.6	0.6	0.5									0.4	0.45	0.5	0.3	0.35
0.65	0.6	0.6	0.5									0.4	0.45	0.5	0.3	0.35
0.65	0.6	0.6	0.5									0.4	0.45	0.5	0.3	0.35
0.65	0.6	0.6	0.5									0.4	0.45	0.5	0.3	0.35
0.65	0.6	0.6	0.55									0.4	0.45	0.5	0.3	0.35
0.65	0.6	0.6	0.55									0.4	0.45	0.5	0.3	0.35
0.65	0.6	0.6	0.55									0.4	0.45	0.5	0.3	0.35
0.65	0.6	0.6	0.55									0.4	0.45	0.5	0.3	0.35
0.65	0.6	0.6	0.55									0.4	0.45	0.5	0.3	0.35
0.65	0.6	0.6	0.55									0.4	0.45	0.5	0.3	0.35
0.65	0.6	0.6	0.55									0.4	0.45	0.5	0.3	0.35
0.65	0.6	0.6	0.55									0.4	0.45	0.5	0.3	0.35
0.65	0.6	0.6	0.55									0.4	0.45	0.5	0.3	0.35
0.65	0.6	0.6	0.55									0.4	0.45	0.5	0.3	0.35
0.65	0.6	0.6	0.55									0.4	0.45	0.5	0.3	0.35
0.65	0.6	0.6	0.55									0.4	0.45	0.5	0.3	0.35
0.65	0.6	0.6	0.55									0.4	0.45	0.5	0.3	0.35
0.65	0.6	0.6	0.55									0.4	0.45	0.5	0.3	0.35
0.65	0.6	0.6	0.55									0.4	0.45	0.5	0.3	0.35
0.65	0.6	0.6	0.55									0.4	0.45	0.5	0.3	0.35
0.65	0.65	0.6	0.55									0.4	0.45	0.5	0.3	0.35
0.65	0.65	0.6	0.55									0.4	0.45	0.5	0.3	0.35
0.65	0.65	0.6	0.55									0.4	0.45	0.5	0.3	0.35
0.65	0.65	0.6	0.55									0.4	0.45	0.5	0.3	0.35
0.65	0.65	0.6	0.55									0.4	0.45	0.5	0.3	0.35
0.65	0.65	0.6	0.55									0.4	0.45	0.5	0.3	0.35
0.65	0.65	0.6	0.55									0.4	0.45	0.5	0.3	0.35
0.65	0.65	0.6	0.55									0.4	0.45	0.5	0.3	0.35
0.65	0.65	0.6	0.55									0.4	0.45	0.5	0.3	0.35
0.65	0.65	0.6	0.55									0.4	0.45	0.5	0.3	0.35
0.65	0.65	0.6	0.55									0.4	0.45	0.5	0.3	0.35
0.65	0.65	0.6	0.55									0.45	0.45	0.5	0.3	0.35
0.65	0.65	0.6	0.55									0.45	0.5	0.5	0.3	0.35
0.65	0.65	0.6	0.55									0.45	0.5	0.5	0.3	0.35
0.65	0.65	0.6	0.55									0.45	0.5	0.5	0.3	0.35
0.7	0.65	0.6	0.55									0.45	0.5	0.5	0.3	0.4
0.7	0.65	0.6	0.55									0.45	0.5	0.5	0.3	0.4
0.7	0.65	0.6	0.55									0.45	0.5	0.5	0.3	0.4
0.7	0.65	0.6	0.55									0.45	0.5	0.5	0.3	0.4
0.7	0.65	0.6	0.55									0.45	0.5	0.5	0.3	0.4
0.7	0.65	0.6	0.55									0.45	0.5	0.5	0.3	0.4
0.7	0.65	0.6	0.55									0.45	0.5	0.5	0.3	0.4
0.7	0.65	0.6	0.55									0.45	0.5	0.5	0.3	0.4
0.7	0.65	0.6	0.55									0.45	0.5	0.5	0.3	0.4
0.7	0.65	0.6	0.55									0.45	0.5	0.5	0.3	0.4
0.7	0.65	0.6	0.55									0.45	0.5	0.5	0.3	0.4
0.7	0.65	0.6	0.55									0.45	0.5	0.55	0.3	0.4
0.7	0.65	0.6	0.55									0.45	0.5	0.55	0.3	0.4
0.7	0.65	0.6	0.55									0.45	0.5	0.55	0.3	0.4
0.7	0.65	0.6	0.55									0.45	0.5	0.55	0.3	0.4
0.7	0.65	0.65	0.55									0.45	0.5	0.55	0.3	0.4
0.7	0.65	0.65	0.55									0.45	0.5	0.55	0.3	0.4
0.7	0.65	0.65	0.55									0.45	0.5	0.55	0.3	0.4
0.7	0.65	0.65	0.55									0.45	0.5	0.55	0.3	0.4
0.7	0.65	0.65	0.55									0.45	0.5	0.55	0.3	0.4
0.7	0.65	0.65	0.55									0.45	0.5	0.55	0.3	0.4
0.7	0.65	0.65	0.55									0.45	0.5	0.55	0.3	0.4
0.7	0.65	0.65	0.55									0.45	0.5	0.55	0.3	0.4
0.7	0.65	0.65	0.55									0.45	0.5	0.55	0.3	0.4
0.7	0.65	0.65	0.55									0.45	0.5	0.55	0.3	0.4
0.7	0.65	0.65	0.55									0.45	0.5	0.55	0.3	0.4
0.7	0.65	0.65	0.55									0.45	0.5	0.55	0.3	0.4
0.7	0.65	0.65	0.55									0.45	0.5	0.55	0.3	0.4
0.7	0.65	0.65	0.55									0.45	0.5	0.55	0.3	0.4
0.7	0.65	0.65	0.55									0.45	0.5	0.55	0.3	0.4
0.7	0.65	0.65	0.55									0.45	0.5	0.55	0.3	0.4
0.7	0.65	0.65	0.55									0.45	0.5	0.55	0.3	0.4
0.7	0.7	0.65	0.55									0.45	0.5	0.55	0.3	0.4
0.7	0.7	0.65	0.55									0.45	0.5	0.55	0.3	0.4
0.7	0.7	0.65	0.55									0.45	0.5	0.55	0.3	0.4
0.7	0.7	0.65	0.55									0.45	0.5	0.55	0.3	0.4
0.7	0.7	0.65	0.55									0.45	0.5	0.55	0.3	0.4
0.7	0.7	0.65	0.55									0.45	0.5	0.55	0.3	0.4
0.7	0.7	0.65	0.55									0.45	0.5	0.55	0.3	0.4
0.7	0.7	0.65	0.6									0.45	0.5	0.55	0.3	0.4
0.7	0.7	0.65	0.6									0.45	0.5	0.55	0.3	0.4
0.7	0.7	0.65	0.6									0.45	0.5	0.55	0.3	0.4
0.7	0.7	0.65	0.6									0.45	0.5	0.55	0.3	0.4
0.7	0.7	0.65	0.6									0.45	0.5	0.55	0.3	0.4
0.7	0.7	0.65	0.6									0.45	0.5	0.55	0.3	0.4
0.7	0.7	0.65	0.6									0.45	0.5	0.55	0.3	0.4
0.7	0.7	0.65	0.6									0.45	0.5	0.55	0.3	0.4
0.7	0.7	0.65	0.6									0.45	0.55	0.55	0.3	0.4
0.7	0.7	0.65	0.6									0.45	0.55	0.55	0.3	0.4
0.7	0.7	0.65	0.6									0.45	0.55	0.55	0.3	0.4
0.7	0.7	0.65	0.6									0.45	0.55	0.55	0.3	0.4
0.7	0.7	0.65	0.6									0.45	0.55	0.55	0.3	0.4
0.7	0.7	0.65	0.6									0.45	0.55	0.55	0.3	0.4
0.7	0.7	0.65	0.6									0.45	0.55	0.55	0.3	0.4
0.7	0.7	0.65	0.6									0.45	0.55	0.55	0.3	0.4
0.7	0.7	0.65	0.6									0.45	0.55	0.55	0.3	0.4
0.7	0.7	0.65	0.6									0.45	0.55	0.55	0.3	0.4
0.75	0.7	0.65	0.6									0.45	0.55	0.55	0.3	0.4
0.75	0.7	0.65	0.6									0.45	0.55	0.55	0.3	0.4
0.75	0.7	0.65	0.6									0.45	0.55	0.55	0.3	0.4
0.75	0.7	0.65	0.6									0.45	0.55	0.55	0.3	0.4
0.75	0.7	0.65	0.6									0.45	0.55	0.55	0.3	0.4
0.75	0.7	0.65	0.6									0.45	0.55	0.55	0.3	0.4
0.75	0.7	0.65	0.6									0.45	0.55	0.55	0.3	0.4
0.75	0.7	0.65	0.6									0.45	0.55	0.55	0.3	0.4
0.75	0.7	0.65	0.6									0.45	0.55	0.55	0.3	0.4
0.75	0.7	0.65	0.6									0.45	0.55	0.6	0.3	0.4
0.75	0.7	0.7	0.6									0.45	0.55	0.6	0.3	0.4
0.75	0.7	0.7	0.6									0.45	0.55	0.6	0.3	0.4
0.75	0.7	0.7	0.6									0.45	0.55	0.6	0.3	0.4
0.75	0.7	0.7	0.6									0.45	0.55	0.6	0.3	0.4
0.75	0.7	0.7	0.6									0.45	0.55	0.6	0.3	0.4
0.75	0.75	0.7	0.6									0.45	0.55	0.6	0.3	0.4
0.75	0.75	0.7	0.6									0.45	0.55	0.6	0.3	0.4
0.75	0.75	0.7	0.6									0.45	0.55	0.6	0.3	0.4
0.75	0.75	0.7	0.6									0.45	0.55	0.6	0.3	0.4
0.75	0.75	0.7	0.6									0.45	0.55	0.6	0.3	0.4
0.75	0.75	0.7	0.6									0.45	0.55	0.6	0.3	0.4
0.75	0.75	0.7	0.6									0.45	0.55	0.6	0.3	0.4
0.75	0.75	0.7	0.6									0.45	0.55	0.6	0.3	0.4
0.75	0.75	0.7	0.6									0.5	0.55	0.6	0.3	0.4
0.75	0.75	0.7	0.6									0.5	0.55	0.6	0.3	0.4
0.75	0.75	0.7	0.6									0.5	0.55	0.6	0.3	0.45
0.75	0.75	0.7	0.65									0.5	0.55	0.6	0.3	0.45
0.75	0.75	0.7	0.65									0.5	0.55	0.6	0.3	0.45
0.75	0.75	0.7	0.65									0.5	0.55	0.6	0.3	0.45
0.75	0.75	0.7	0.65									0.5	0.55	0.6	0.3	0.45
0.75	0.75	0.7	0.65									0.5	0.55	0.6	0.3	0.45
0.75	0.75	0.7	0.65									0.5	0.55	0.6	0.3	0.45
0.75	0.75	0.7	0.65									0.5	0.6	0.6	0.35	0.45
0.75	0.75	0.7	0.65									0.5	0.6	0.6	0.35	0.45
0.75	0.75	0.7	0.65									0.5	0.6	0.6	0.35	0.45
0.75	0.75	0.7	0.65									0.5	0.6	0.6	0.35	0.45
0.75	0.75	0.7	0.65									0.5	0.6	0.6	0.35	0.45
0.75	0.75	0.7	0.65									0.5	0.6	0.6	0.35	0.45
0.75	0.75	0.7	0.65									0.5	0.6	0.6	0.35	0.45
0.75	0.75	0.7	0.65									0.5	0.6	0.6	0.35	0.45
0.75	0.75	0.7	0.65									0.5	0.6	0.6	0.35	0.45
0.75	0.75	0.7	0.65									0.5	0.6	0.6	0.35	0.45
0.75	0.75	0.7	0.65									0.5	0.6	0.6	0.35	0.45
0.75	0.75	0.7	0.65									0.5	0.6	0.6	0.35	0.45
0.75	0.75	0.7	0.65									0.5	0.6	0.6	0.35	0.45
0.8	0.75	0.7	0.65									0.5	0.6	0.6	0.35	0.45
0.8	0.75	0.7	0.65									0.5	0.6	0.65	0.35	0.45
0.8	0.75	0.7	0.65									0.5	0.6	0.65	0.35	0.45
0.8	0.75	0.7	0.65									0.5	0.6	0.65	0.35	0.45
0.8	0.75	0.7	0.65									0.5	0.6	0.65	0.35	0.45
0.8	0.75	0.7	0.65									0.5	0.6	0.65	0.35	0.45
0.8	0.75	0.7	0.65									0.5	0.6	0.65	0.35	0.45
0.8	0.75	0.7	0.65									0.5	0.6	0.65	0.35	0.45
0.8	0.75	0.75	0.65									0.5	0.6	0.65	0.35	0.45
0.8	0.75	0.75	0.65									0.5	0.6	0.65	0.35	0.45
0.8	0.75	0.75	0.65									0.5	0.6	0.65	0.35	0.45
0.8	0.75	0.75	0.65									0.5	0.6	0.65	0.35	0.45
0.8	0.75	0.75	0.65									0.5	0.6	0.65	0.35	0.45
0.8	0.75	0.75	0.65									0.5	0.6	0.65	0.35	0.45
0.8	0.75	0.75	0.65									0.5	0.6	0.65	0.35	0.45
0.8	0.75	0.75	0.65									0.5	0.6	0.65	0.35	0.45
0.8	0.75	0.75	0.65									0.5	0.6	0.65	0.35	0.45
0.8	0.75	0.75	0.65									0.5	0.6	0.65	0.35	0.45
0.8	0.75	0.75	0.65									0.5	0.6	0.65	0.35	0.45
0.8	0.8	0.75	0.65									0.5	0.6	0.65	0.35	0.45
0.8	0.8	0.75	0.65									0.5	0.6	0.65	0.35	0.45
0.8	0.8	0.75	0.65									0.5	0.6	0.65	0.35	0.45
0.8	0.8	0.75	0.65									0.5	0.6	0.65	0.35	0.45
0.8	0.8	0.75	0.65									0.5	0.6	0.65	0.35	0.45
0.8	0.8	0.75	0.65									0.5	0.6	0.65	0.35	0.45
0.8	0.8	0.75	0.65									0.5	0.6	0.65	0.35	0.45
0.8	0.8	0.75	0.65									0.5	0.6	0.65	0.35	0.45
0.8	0.8	0.75	0.65									0.5	0.6	0.65	0.35	0.45
0.8	0.8	0.75	0.7									0.5	0.6	0.65	0.35	0.45
0.8	0.8	0.75	0.7									0.5	0.6	0.65	0.35	0.45
0.8	0.8	0.75	0.7									0.5	0.6	0.65	0.35	0.45
0.8	0.8	0.75	0.7									0.5	0.6	0.65	0.35	0.45
0.8	0.8	0.75	0.7									0.5	0.6	0.65	0.35	0.45
0.8	0.8	0.75	0.7									0.5	0.6	0.65	0.35	0.45
0.8	0.8	0.75	0.7									0.5	0.6	0.65	0.35	0.45
0.8	0.8	0.75	0.7									0.5	0.6	0.65	0.35	0.45
0.8	0.8	0.75	0.7									0.5	0.6	0.65	0.35	0.45
0.8	0.8	0.75	0.7									0.5	0.6	0.65	0.35	0.45
0.8	0.8	0.75	0.7									0.5	0.6	0.65	0.35	0.45
0.8	0.8	0.75	0.7									0.5	0.6	0.65	0.35	0.45
0.8	0.8	0.75	0.7									0.55	0.65	0.65	0.35	0.45
0.8	0.8	0.75	0.7									0.55	0.65	0.65	0.35	0.45
0.8	0.8	0.75	0.7									0.55	0.65	0.7	0.35	0.45
0.8	0.8	0.75	0.7									0.55	0.65	0.7	0.35	0.45
0.8	0.8	0.75	0.7									0.55	0.65	0.7	0.35	0.45
0.8	0.8	0.75	0.7									0.55	0.65	0.7	0.35	0.45
0.8	0.8	0.75	0.7									0.55	0.65	0.7	0.35	0.45
0.8	0.8	0.75	0.7									0.55	0.65	0.7	0.35	0.45
0.85	0.8	0.75	0.7									0.55	0.65	0.7	0.35	0.45
0.85	0.8	0.75	0.7									0.55	0.65	0.7	0.35	0.45
0.85	0.8	0.75	0.7									0.55	0.65	0.7	0.35	0.45
0.85	0.8	0.75	0.7									0.55	0.65	0.7	0.35	0.45
0.85	0.8	0.8	0.7									0.55	0.65	0.7	0.35	0.45
0.85	0.8	0.8	0.7									0.55	0.65	0.7	0.35	0.45
0.85	0.8	0.8	0.7									0.55	0.65	0.7	0.35	0.45
0.85	0.8	0.8	0.7									0.55	0.65	0.7	0.35	0.45
0.85	0.8	0.8	0.7									0.55	0.65	0.7	0.35	0.45
0.85	0.8	0.8	0.7									0.55	0.65	0.7	0.35	0.45
0.85	0.8	0.8	0.7									0.55	0.65	0.7	0.35	0.45
0.85	0.8	0.8	0.7									0.55	0.65	0.7	0.35	0.45
0.85	0.8	0.8	0.7									0.55	0.65	0.7	0.35	0.45
0.85	0.8	0.8	0.7									0.55	0.65	0.7	0.35	0.45
0.85	0.8	0.8	0.7									0.55	0.65	0.7	0.35	0.45
0.85	0.8	0.8	0.7									0.55	0.65	0.7	0.35	0.45
0.85	0.8	0.8	0.7									0.55	0.65	0.7	0.35	0.45
0.85	0.8	0.8	0.7									0.55	0.65	0.7	0.35	0.45
0.85	0.8	0.8	0.7									0.55	0.65	0.7	0.35	0.45
0.85	0.8	0.8	0.7									0.55	0.65	0.7	0.35	0.45
0.85	0.8	0.8	0.7									0.55	0.65	0.7	0.35	0.45
0.85	0.8	0.8	0.7									0.55	0.65	0.7	0.35	0.45
0.85	0.8	0.8	0.7									0.55	0.65	0.75	0.35	0.45
0.85	0.8	0.8	0.7									0.55	0.65	0.75	0.35	0.5
0.85	0.85	0.8	0.7									0.55	0.65	0.75	0.35	0.5
0.85	0.85	0.8	0.7									0.55	0.65	0.75	0.35	0.5
0.85	0.85	0.8	0.7									0.55	0.65	0.75	0.35	0.5
0.85	0.85	0.8	0.7									0.55	0.65	0.75	0.35	0.5
0.85	0.85	0.8	0.7									0.55	0.65	0.75	0.35	0.5
0.85	0.85	0.8	0.7									0.55	0.7	0.75	0.35	0.5
0.85	0.85	0.8	0.7									0.55	0.7	0.75	0.35	0.5
0.85	0.85	0.8	0.7									0.55	0.7	0.75	0.35	0.5
0.85	0.85	0.8	0.7									0.55	0.7	0.75	0.35	0.5
0.85	0.85	0.8	0.7									0.55	0.7	0.75	0.35	0.5
0.85	0.85	0.8	0.7									0.55	0.7	0.75	0.35	0.5
0.85	0.85	0.8	0.7									0.55	0.7	0.75	0.35	0.5
0.85	0.85	0.8	0.75									0.55	0.7	0.75	0.35	0.5
0.85	0.85	0.8	0.75									0.55	0.7	0.75	0.35	0.5
0.85	0.85	0.8	0.75									0.55	0.7	0.75	0.35	0.5
0.85	0.85	0.8	0.75									0.55	0.7	0.75	0.35	0.5
0.85	0.85	0.8	0.75									0.55	0.7	0.75	0.35	0.5
0.85	0.85	0.8	0.75									0.55	0.7	0.75	0.35	0.5
0.85	0.85	0.8	0.75									0.55	0.7	0.75	0.35	0.5
0.85	0.85	0.8	0.75									0.55	0.7	0.75	0.35	0.5
0.85	0.85	0.8	0.75									0.55	0.7	0.75	0.35	0.5
0.85	0.85	0.8	0.75									0.55	0.7	0.75	0.35	0.5
0.85	0.85	0.8	0.75									0.55	0.7	0.75	0.35	0.5
0.85	0.85	0.8	0.75									0.55	0.7	0.75	0.35	0.5
0.85	0.85	0.8	0.75									0.6	0.7	0.75	0.35	0.5
0.85	0.85	0.85	0.75									0.6	0.7	0.75	0.35	0.5
0.85	0.85	0.85	0.75									0.6	0.7	0.8	0.35	0.5
0.85	0.85	0.85	0.75									0.6	0.7	0.8	0.35	0.5
0.85	0.85	0.85	0.75									0.6	0.7	0.8	0.35	0.5
0.85	0.85	0.85	0.75									0.6	0.7	0.8	0.35	0.5
0.85	0.85	0.85	0.75									0.6	0.7	0.8	0.35	0.5
0.85	0.85	0.85	0.75									0.6	0.7	0.8	0.35	0.5
0.85	0.85	0.85	0.75									0.6	0.7	0.8	0.35	0.5
0.85	0.85	0.85	0.75									0.6	0.7	0.8	0.35	0.5
0.85	0.85	0.85	0.75									0.6	0.7	0.8	0.35	0.5
0.9	0.85	0.85	0.75									0.6	0.7	0.8	0.4	0.5
0.9	0.85	0.85	0.75									0.6	0.75	0.8	0.4	0.5
0.9	0.85	0.85	0.75									0.6	0.75	0.8	0.4	0.5
0.9	0.85	0.85	0.75									0.6	0.75	0.8	0.4	0.5
0.9	0.85	0.85	0.75									0.6	0.75	0.8	0.4	0.5
0.9	0.85	0.85	0.75									0.6	0.75	0.8	0.4	0.5
0.9	0.9	0.85	0.75									0.6	0.75	0.8	0.4	0.5
0.9	0.9	0.85	0.75									0.6	0.75	0.8	0.4	0.5
0.9	0.9	0.85	0.75									0.6	0.75	0.8	0.4	0.5
0.9	0.9	0.85	0.75									0.6	0.75	0.8	0.4	0.5
0.9	0.9	0.85	0.75									0.6	0.75	0.8	0.4	0.5
0.9	0.9	0.85	0.75									0.6	0.75	0.8	0.4	0.5
0.9	0.9	0.85	0.75									0.6	0.75	0.8	0.4	0.5
0.9	0.9	0.85	0.8									0.6	0.75	0.8	0.4	0.5
0.9	0.9	0.85	0.8									0.6	0.75	0.8	0.4	0.5
0.9	0.9	0.85	0.8									0.6	0.75	0.8	0.4	0.5
0.9	0.9	0.85	0.8									0.6	0.75	0.8	0.4	0.5
0.9	0.9	0.85	0.8									0.6	0.75	0.8	0.4	0.5
0.9	0.9	0.85	0.8									0.6	0.75	0.8	0.4	0.5
0.9	0.9	0.9	0.8									0.6	0.75	0.8	0.4	0.5
0.9	0.9	0.9	0.8									0.6	0.75	0.8	0.4	0.5
0.9	0.9	0.9	0.8									0.6	0.75	0.85	0.4	0.5
0.9	0.9	0.9	0.8									0.6	0.75	0.85	0.4	0.5
0.9	0.9	0.9	0.8									0.6	0.75	0.85	0.4	0.5
0.9	0.9	0.9	0.8									0.6	0.75	0.85	0.4	0.5
0.9	0.9	0.9	0.8									0.6	0.75	0.85	0.4	0.5
0.9	0.9	0.9	0.8									0.6	0.75	0.85	0.4	0.5
0.9	0.9	0.9	0.8									0.6	0.75	0.85	0.4	0.5
0.9	0.9	0.9	0.8									0.6	0.75	0.85	0.4	0.5
0.9	0.9	0.9	0.8									0.6	0.75	0.85	0.4	0.5
0.9	0.9	0.9	0.8									0.6	0.75	0.85	0.4	0.5
0.9	0.9	0.9	0.8									0.6	0.75	0.85	0.4	0.5
0.9	0.9	0.9	0.8									0.6	0.75	0.85	0.4	0.5
0.9	0.9	0.9	0.8									0.6	0.75	0.85	0.4	0.5
0.9	0.9	0.9	0.8									0.65	0.75	0.85	0.4	0.55
0.9	0.9	0.9	0.8									0.65	0.8	0.85	0.4	0.55
0.9	0.9	0.9	0.8									0.65	0.8	0.85	0.4	0.55
0.9	0.9	0.9	0.8									0.65	0.8	0.85	0.4	0.55
0.9	0.9	0.9	0.8									0.65	0.8	0.85	0.4	0.55
0.9	0.9	0.9	0.8									0.65	0.8	0.85	0.4	0.55
0.9	0.9	0.9	0.8									0.65	0.8	0.85	0.4	0.55
0.9	0.9	0.9	0.8									0.65	0.8	0.85	0.4	0.55
0.9	0.9	0.9	0.8									0.65	0.8	0.85	0.4	0.55
0.9	0.9	0.9	0.8									0.65	0.8	0.85	0.4	0.55
0.9	0.95	0.9	0.8									0.65	0.8	0.85	0.4	0.55
0.9	0.95	0.9	0.8									0.65	0.8	0.85	0.4	0.55
0.9	0.95	0.9	0.8									0.65	0.8	0.85	0.4	0.55
0.9	0.95	0.9	0.8									0.65	0.8	0.85	0.4	0.55
0.9	0.95	0.9	0.8									0.65	0.8	0.85	0.4	0.55
0.9	0.95	0.95	0.8									0.65	0.8	0.9	0.4	0.55
0.9	0.95	0.95	0.8									0.65	0.8	0.9	0.4	0.55
0.95	0.95	0.95	0.8									0.65	0.8	0.9	0.4	0.55
0.95	0.95	0.95	0.85									0.65	0.8	0.9	0.4	0.55
0.95	0.95	0.95	0.85									0.65	0.8	0.9	0.4	0.55
0.95	0.95	0.95	0.85									0.65	0.8	0.9	0.4	0.55
0.95	0.95	0.95	0.85									0.65	0.85	0.9	0.4	0.55
0.95	0.95	0.95	0.85									0.65	0.85	0.9	0.4	0.55
0.95	0.95	0.95	0.85									0.65	0.85	0.9	0.4	0.55
0.95	0.95	0.95	0.85									0.65	0.85	0.9	0.4	0.55
0.95	0.95	0.95	0.85									0.65	0.85	0.9	0.4	0.55
0.95	0.95	0.95	0.85									0.65	0.85	0.9	0.4	0.55
0.95	0.95	0.95	0.85									0.65	0.85	0.9	0.4	0.55
0.95	0.95	0.95	0.85									0.65	0.85	0.9	0.4	0.55
0.95	0.95	0.95	0.85									0.65	0.85	0.9	0.4	0.55
0.95	0.95	0.95	0.85									0.65	0.85	0.9	0.4	0.55
0.95	0.95	0.95	0.85									0.65	0.85	0.9	0.4	0.55
0.95	0.95	0.95	0.85									0.65	0.85	0.9	0.4	0.55
0.95	0.95	0.95	0.85									0.65	0.85	0.9	0.4	0.55
0.95	0.95	0.95	0.85									0.65	0.85	0.9	0.4	0.55
0.95	0.95	0.95	0.85									0.7	0.85	0.9	0.4	0.55
0.95	0.95	0.95	0.85									0.7	0.85	0.9	0.4	0.55
0.95	1	0.95	0.85									0.7	0.85	0.9	0.4	0.55
0.95	1	0.95	0.85									0.7	0.85	0.9	0.4	0.55
0.95	1	0.95	0.85									0.7	0.85	0.9	0.4	0.55
0.95	1	0.95	0.85									0.7	0.85	0.9	0.4	0.55
0.95	1	0.95	0.85									0.7	0.85	0.95	0.4	0.55
0.95	1	0.95	0.85									0.7	0.85	0.95	0.4	0.55
0.95	1	1	0.9									0.7	0.85	0.95	0.4	0.55
0.95	1	1	0.9									0.7	0.85	0.95	0.4	0.55
0.95	1	1	0.9									0.7	0.85	0.95	0.4	0.55
0.95	1	1	0.9									0.7	0.85	0.95	0.4	0.55
0.95	1	1	0.9									0.7	0.85	0.95	0.4	0.55
0.95	1	1	0.9									0.7	0.85	0.95	0.4	0.55
0.95	1	1	0.9									0.7	0.85	0.95	0.4	0.55
0.95	1	1	0.9									0.7	0.9	0.95	0.4	0.55
0.95	1	1	0.9									0.7	0.9	0.95	0.4	0.55
0.95	1	1	0.9									0.7	0.9	0.95	0.4	0.55
0.95	1	1	0.9									0.7	0.9	1	0.4	0.55
0.95	1	1	0.9									0.7	0.9	1	0.4	0.55
0.95	1	1	0.9									0.7	0.9	1	0.4	0.6
0.95	1	1	0.9									0.7	0.9	1	0.4	0.6
0.95	1	1	0.9									0.7	0.9	1	0.4	0.6
0.95	1	1	0.9									0.7	0.9	1	0.45	0.6
0.95	1	1	0.9									0.7	0.9	1	0.45	0.6
0.95	1	1	0.9									0.7	0.9	1	0.45	0.6
0.95	1.05	1	0.9									0.7	0.9	1	0.45	0.6
0.95	1.05	1	0.9									0.7	0.9	1	0.45	0.6
1	1.05	1	0.9									0.7	0.9	1	0.45	0.6
1	1.05	1	0.9									0.7	0.9	1	0.45	0.6
1	1.05	1	0.9									0.7	0.9	1	0.45	0.6
1	1.05	1	0.9									0.7	0.9	1	0.45	0.6
1	1.05	1	0.9									0.7	0.9	1	0.45	0.6
1	1.05	1	0.9									0.7	0.9	1	0.45	0.6
1	1.05	1	0.9									0.7	0.95	1	0.45	0.6
1	1.05	1	0.9									0.7	0.95	1	0.45	0.6
1	1.05	1	0.9									0.7	0.95	1.05	0.45	0.6
1	1.05	1	0.9									0.7	0.95	1.05	0.45	0.6
1	1.05	1	0.9									0.7	0.95	1.05	0.45	0.6
1	1.05	1	0.9									0.7	0.95	1.05	0.45	0.6
1	1.05	1.05	0.9									0.7	0.95	1.05	0.45	0.6
1	1.05	1.05	0.9									0.7	0.95	1.05	0.45	0.6
1	1.05	1.05	0.9									0.7	0.95	1.05	0.45	0.6
1	1.05	1.05	0.9									0.7	0.95	1.05	0.45	0.6
1	1.05	1.05	0.9									0.7	1	1.05	0.45	0.6
1	1.05	1.05	0.9									0.75	1	1.05	0.45	0.6
1	1.05	1.05	0.9									0.75	1	1.05	0.45	0.6
1	1.05	1.05	0.9									0.75	1	1.05	0.45	0.6
1	1.05	1.05	0.9									0.75	1	1.05	0.45	0.6
1	1.05	1.05	0.9									0.75	1	1.05	0.45	0.6
1	1.05	1.05	0.95									0.75	1	1.05	0.45	0.6
1	1.05	1.05	0.95									0.75	1	1.05	0.45	0.6
1	1.05	1.05	0.95									0.75	1	1.05	0.45	0.6
1	1.05	1.05	0.95									0.75	1	1.05	0.45	0.6
1	1.05	1.05	0.95									0.75	1	1.1	0.45	0.6
1	1.05	1.05	0.95									0.75	1	1.1	0.45	0.6
1	1.05	1.05	0.95									0.75	1	1.1	0.45	0.6
1	1.1	1.05	0.95									0.75	1	1.1	0.45	0.6
1	1.1	1.05	0.95									0.75	1	1.1	0.45	0.6
1	1.1	1.05	0.95									0.75	1	1.1	0.45	0.6
1	1.1	1.05	0.95									0.75	1	1.1	0.45	0.6
1	1.1	1.05	0.95									0.75	1	1.1	0.45	0.6
1	1.1	1.05	0.95									0.75	1	1.1	0.45	0.6
1	1.1	1.05	0.95									0.75	1.05	1.1	0.45	0.6
1	1.1	1.05	0.95									0.75	1.05	1.1	0.45	0.6
1	1.1	1.05	0.95									0.75	1.05	1.1	0.45	0.6
1	1.1	1.05	0.95									0.75	1.05	1.1	0.45	0.6
1	1.1	1.05	0.95									0.75	1.05	1.1	0.45	0.6
1	1.1	1.05	0.95									0.75	1.05	1.1	0.45	0.65
1	1.1	1.05	0.95									0.75	1.05	1.15	0.45	0.65
1	1.1	1.05	0.95									0.75	1.05	1.15	0.45	0.65
1.05	1.1	1.1	0.95									0.75	1.05	1.15	0.45	0.65
1.05	1.1	1.1	0.95									0.75	1.05	1.15	0.45	0.65
1.05	1.1	1.1	0.95									0.8	1.05	1.15	0.45	0.65
1.05	1.1	1.1	0.95									0.8	1.05	1.15	0.45	0.65
1.05	1.1	1.1	0.95									0.8	1.05	1.15	0.45	0.65
1.05	1.1	1.1	0.95									0.8	1.05	1.15	0.45	0.65
1.05	1.1	1.1	0.95									0.8	1.05	1.15	0.45	0.65
1.05	1.1	1.1	0.95									0.8	1.05	1.15	0.45	0.65
1.05	1.1	1.1	0.95									0.8	1.05	1.15	0.45	0.65
1.05	1.1	1.1	0.95									0.8	1.05	1.15	0.45	0.65
1.05	1.1	1.1	1									0.8	1.05	1.2	0.45	0.65
1.05	1.1	1.1	1									0.8	1.05	1.2	0.45	0.65
1.05	1.1	1.1	1									0.8	1.1	1.2	0.45	0.65
1.05	1.1	1.1	1									0.8	1.1	1.2	0.45	0.65
1.05	1.1	1.1	1									0.8	1.1	1.2	0.45	0.65
1.05	1.1	1.1	1									0.8	1.1	1.2	0.45	0.65
1.05	1.1	1.1	1									0.8	1.1	1.2	0.45	0.65
1.05	1.1	1.1	1									0.8	1.1	1.2	0.45	0.65
1.05	1.1	1.1	1									0.8	1.1	1.2	0.45	0.65
1.05	1.15	1.1	1									0.8	1.1	1.2	0.45	0.65
1.05	1.15	1.1	1									0.8	1.1	1.2	0.45	0.65
1.05	1.15	1.1	1									0.8	1.15	1.2	0.45	0.65
1.05	1.15	1.1	1									0.8	1.15	1.25	0.45	0.65
1.05	1.15	1.1	1									0.8	1.15	1.25	0.45	0.65
1.05	1.15	1.1	1									0.8	1.15	1.25	0.45	0.65
1.05	1.15	1.1	1									0.8	1.15	1.25	0.45	0.65
1.05	1.15	1.15	1									0.8	1.15	1.25	0.45	0.65
1.05	1.15	1.15	1									0.8	1.15	1.25	0.45	0.65
1.05	1.15	1.15	1									0.8	1.15	1.25	0.45	0.65
1.05	1.15	1.15	1									0.8	1.15	1.25	0.45	0.65
1.05	1.15	1.15	1									0.8	1.15	1.25	0.45	0.65
1.05	1.15	1.15	1									0.8	1.15	1.25	0.45	0.65
1.05	1.15	1.15	1									0.8	1.15	1.25	0.45	0.65
1.05	1.15	1.15	1									0.8	1.15	1.25	0.45	0.65
1.05	1.15	1.15	1									0.8	1.15	1.25	0.45	0.65
1.05	1.15	1.15	1									0.8	1.2	1.3	0.45	0.65
1.05	1.15	1.15	1									0.85	1.2	1.3	0.45	0.65
1.1	1.15	1.15	1									0.85	1.2	1.3	0.45	0.65
1.1	1.15	1.15	1									0.85	1.2	1.3	0.5	0.7
1.1	1.15	1.15	1									0.85	1.2	1.3	0.5	0.7
1.1	1.15	1.15	1									0.85	1.2	1.3	0.5	0.7
1.1	1.15	1.15	1									0.85	1.2	1.3	0.5	0.7
1.1	1.15	1.15	1									0.85	1.2	1.35	0.5	0.7
1.1	1.15	1.15	1									0.85	1.2	1.35	0.5	0.7
1.1	1.15	1.15	1									0.85	1.25	1.35	0.5	0.7
1.1	1.2	1.15	1									0.85	1.25	1.35	0.5	0.7
1.1	1.2	1.15	1									0.85	1.25	1.35	0.5	0.7
1.1	1.2	1.15	1.05									0.85	1.25	1.4	0.5	0.7
1.1	1.2	1.15	1.05									0.85	1.25	1.4	0.5	0.7
1.1	1.2	1.15	1.05									0.85	1.25	1.4	0.5	0.7
1.1	1.2	1.15	1.05									0.85	1.25	1.4	0.5	0.7
1.1	1.2	1.15	1.05									0.85	1.25	1.4	0.5	0.7
1.1	1.2	1.2	1.05									0.85	1.25	1.4	0.5	0.7
1.1	1.2	1.2	1.05									0.85	1.25	1.4	0.5	0.7
1.1	1.2	1.2	1.05									0.85	1.25	1.4	0.5	0.7
1.1	1.2	1.2	1.05									0.85	1.25	1.4	0.5	0.7
1.1	1.2	1.2	1.05									0.85	1.3	1.45	0.5	0.7
1.1	1.2	1.2	1.05									0.85	1.3	1.45	0.5	0.7
1.1	1.2	1.2	1.05									0.85	1.3	1.45	0.5	0.7
1.1	1.2	1.2	1.05									0.85	1.3	1.45	0.5	0.7
1.1	1.2	1.2	1.05									0.85	1.3	1.45	0.5	0.7
1.1	1.2	1.2	1.05									0.85	1.3	1.45	0.5	0.7
1.1	1.2	1.2	1.05									0.85	1.3	1.45	0.5	0.7
1.1	1.2	1.2	1.05									0.85	1.3	1.45	0.5	0.7
1.1	1.2	1.2	1.05									0.85	1.3	1.45	0.5	0.7
1.1	1.2	1.2	1.05									0.85	1.35	1.45	0.5	0.7
1.1	1.2	1.2	1.05									0.85	1.35	1.45	0.5	0.7
1.1	1.2	1.2	1.05									0.9	1.35	1.5	0.5	0.7
1.1	1.2	1.2	1.05									0.9	1.35	1.5	0.5	0.7
1.1	1.2	1.2	1.05									0.9	1.35	1.5	0.5	0.7
1.1	1.2	1.2	1.1									0.9	1.4	1.5	0.5	0.7
1.1	1.2	1.2	1.1									0.9	1.4	1.55	0.5	0.7
1.1	1.2	1.2	1.1									0.9	1.4	1.55	0.5	0.7
1.1	1.2	1.2	1.1									0.9	1.4	1.55	0.5	0.75
1.1	1.2	1.2	1.1									0.9	1.45	1.55	0.5	0.75
1.15	1.25	1.2	1.1									0.9	1.45	1.55	0.5	0.75
1.15	1.25	1.2	1.1									0.9	1.45	1.55	0.5	0.75
1.15	1.25	1.25	1.1									0.9	1.45	1.55	0.5	0.75
1.15	1.25	1.25	1.1									0.9	1.45	1.6	0.5	0.75
1.15	1.25	1.25	1.1									0.9	1.45	1.6	0.5	0.75
1.15	1.25	1.25	1.1									0.9	1.5	1.6	0.5	0.75
1.15	1.25	1.25	1.1									0.9	1.5	1.65	0.5	0.75
1.15	1.25	1.25	1.1									0.9	1.55	1.65	0.5	0.75
1.15	1.25	1.25	1.1									0.9	1.55	1.65	0.5	0.75
1.15	1.25	1.25	1.1									0.9	1.55	1.65	0.5	0.75
1.15	1.25	1.25	1.1									0.9	1.6	1.65	0.5	0.75
1.15	1.25	1.25	1.1									0.9	1.6	1.7	0.5	0.75
1.15	1.25	1.25	1.1									0.9	1.6	1.7	0.5	0.75
1.15	1.25	1.25	1.1									0.9	1.65	1.7	0.5	0.75
1.15	1.25	1.25	1.1									0.9	1.65	1.7	0.5	0.75
1.15	1.25	1.25	1.1									0.9	1.65	1.7	0.5	0.75
1.15	1.25	1.25	1.1									0.9	1.65	1.7	0.5	0.75
1.15	1.25	1.25	1.1									0.9	1.65	1.7	0.5	0.75
1.15	1.25	1.25	1.1									0.95	1.65	1.8	0.5	0.75
1.15	1.25	1.25	1.1									0.95	1.7	1.8	0.5	0.75
1.15	1.3	1.25	1.1									0.95	1.7	1.85	0.5	0.75
1.15	1.3	1.25	1.1									0.95	1.7	2	0.5	0.75
1.15	1.3	1.25	1.1									0.95	1.75	2	0.5	0.75
1.15	1.3	1.25	1.15									0.95	1.75	2	0.55	0.75
1.15	1.3	1.25	1.15									0.95	1.8	2	0.55	0.75
1.15	1.3	1.3	1.15									0.95	1.8	2.05	0.55	0.75
1.15	1.3	1.3	1.15									0.95	1.85	2.1	0.55	0.75
1.15	1.3	1.3	1.15									0.95	1.85	2.1	0.55	0.8
1.15	1.3	1.3	1.15									0.95	1.85	2.15	0.55	0.8
1.15	1.3	1.3	1.15									0.95	1.9	2.15	0.55	0.8
1.15	1.3	1.3	1.15									0.95	1.9	2.2	0.55	0.8
1.15	1.3	1.3	1.15									0.95	1.9	2.3	0.55	0.8
1.15	1.3	1.3	1.15									0.95	1.9	2.35	0.55	0.8
1.2	1.3	1.3	1.15									0.95	1.95	2.35	0.55	0.8
1.2	1.3	1.3	1.15									0.95	1.95	2.35	0.55	0.8
1.2	1.3	1.3	1.15									0.95	1.95	2.6	0.55	0.8
1.2	1.3	1.3	1.15									0.95	2	2.65	0.55	0.8
1.2	1.3	1.3	1.15									0.95	2	2.7	0.55	0.8
1.2	1.3	1.3	1.15									0.95	2	2.7	0.55	0.8
1.2	1.3	1.3	1.15									1	2	3.05	0.55	0.8
1.2	1.3	1.3	1.15									1	2.05	3.3	0.55	0.8
1.2	1.3	1.3	1.15									1	2.05	3.35	0.55	0.8
1.2	1.3	1.3	1.15									1	2.05	3.35	0.55	0.8
1.2	1.3	1.3	1.15									1	2.15	3.45	0.55	0.85
1.2	1.3	1.3	1.15									1	2.2	3.7	0.55	0.85
1.2	1.3	1.3	1.15									1	2.25	4.65	0.55	0.85
1.2	1.3	1.3	1.15									1	2.4	5	0.55	0.85
1.2	1.3	1.3	1.2									1	2.5	5.45	0.55	0.85
1.2	1.35	1.3	1.2									1	2.55	6.3	0.55	0.85
1.2	1.35	1.3	1.2									1	2.85	7.85	0.55	0.85
1.2	1.35	1.3	1.2									1	3.05		0.55	0.85
1.2	1.35	1.3	1.2									1	3.05		0.55	0.85
1.2	1.35	1.3	1.2									1	3.7		0.55	0.85
1.2	1.35	1.3	1.2									1	4		0.55	0.85
1.2	1.35	1.3	1.2									1			0.55	0.85
1.2	1.35	1.3	1.2									1.05			0.55	0.85
1.2	1.35	1.3	1.2									1.05			0.55	0.85
1.2	1.35	1.35	1.2									1.05			0.55	0.85
1.2	1.35	1.35	1.2									1.05			0.55	0.85
1.25	1.35	1.35	1.2									1.05			0.55	0.85
1.25	1.35	1.35	1.2									1.05			0.55	0.85
1.25	1.35	1.35	1.2									1.05			0.55	0.85
1.25	1.35	1.35	1.2									1.05			0.55	0.85
1.25	1.35	1.35	1.2									1.05			0.55	0.9
1.25	1.35	1.35	1.2									1.05			0.55	0.9
1.25	1.35	1.35	1.2									1.05			0.55	0.9
1.25	1.35	1.35	1.2									1.05			0.55	0.9
1.25	1.35	1.35	1.2									1.05			0.55	0.9
1.25	1.35	1.35	1.2									1.05			0.55	0.9
1.25	1.35	1.35	1.2									1.05			0.55	0.9
1.25	1.35	1.35	1.2									1.05			0.55	0.9
1.25	1.35	1.35	1.2									1.05			0.55	0.9
1.25	1.35	1.35	1.2									1.05			0.55	0.9
1.25	1.35	1.35	1.2									1.1			0.55	0.9
1.25	1.35	1.35	1.2									1.1			0.55	0.9
1.25	1.4	1.35	1.2									1.1			0.55	0.9
1.25	1.4	1.35	1.2									1.1			0.55	0.9
1.25	1.4	1.35	1.2									1.1			0.55	0.9
1.25	1.4	1.35	1.2									1.1			0.55	0.9
1.25	1.4	1.35	1.2									1.1			0.55	0.9
1.25	1.4	1.4	1.2									1.1			0.55	0.9
1.25	1.4	1.4	1.25									1.1			0.55	0.9
1.25	1.4	1.4	1.25									1.1			0.55	0.9
1.25	1.4	1.4	1.25									1.1			0.55	0.9
1.25	1.4	1.4	1.25									1.1			0.55	0.9
1.25	1.4	1.4	1.25									1.1			0.55	0.95
1.25	1.4	1.4	1.25									1.1			0.55	0.95
1.25	1.4	1.4	1.25									1.1			0.6	0.95
1.25	1.4	1.4	1.25									1.1			0.6	0.95
1.25	1.4	1.4	1.25									1.1			0.6	0.95
1.25	1.4	1.4	1.25									1.1			0.6	0.95
1.25	1.4	1.4	1.25									1.1			0.6	0.95
1.25	1.4	1.4	1.25									1.15			0.6	0.95
1.25	1.4	1.4	1.25									1.15			0.6	0.95
1.25	1.4	1.4	1.25									1.15			0.6	0.95
1.3	1.4	1.4	1.25									1.15			0.6	0.95
1.3	1.4	1.4	1.25									1.15			0.6	0.95
1.3	1.4	1.4	1.25									1.15			0.6	0.95
1.3	1.4	1.4	1.25									1.15			0.6	0.95
1.3	1.4	1.4	1.25									1.15			0.6	0.95
1.3	1.4	1.4	1.25									1.15			0.6	0.95
1.3	1.4	1.4	1.25									1.15			0.6	1
1.3	1.45	1.4	1.25									1.15			0.6	1
1.3	1.45	1.4	1.25									1.15			0.6	1
1.3	1.45	1.45	1.25									1.15			0.6	1
1.3	1.45	1.45	1.25									1.2			0.6	1
1.3	1.45	1.45	1.25									1.2			0.6	1
1.3	1.45	1.45	1.25									1.2			0.6	1
1.3	1.45	1.45	1.25									1.2			0.6	1
1.3	1.45	1.45	1.25									1.2			0.6	1
1.3	1.45	1.45	1.3									1.2			0.6	1
1.3	1.45	1.45	1.3									1.2			0.6	1
1.3	1.45	1.45	1.3									1.2			0.6	1
1.3	1.45	1.45	1.3									1.2			0.6	1
1.3	1.45	1.45	1.3									1.2			0.6	1.05
1.3	1.45	1.45	1.3									1.2			0.6	1.05
1.3	1.45	1.45	1.3									1.2			0.6	1.05
1.3	1.45	1.45	1.3									1.2			0.6	1.05
1.3	1.45	1.45	1.3									1.25			0.6	1.05
1.3	1.45	1.45	1.3									1.25			0.6	1.05
1.3	1.45	1.45	1.3									1.25			0.6	1.05
1.3	1.45	1.45	1.3									1.25			0.6	1.05
1.3	1.45	1.45	1.3									1.25			0.6	1.05
1.3	1.45	1.45	1.3									1.25			0.6	1.05
1.3	1.5	1.45	1.3									1.25			0.6	1.05
1.3	1.5	1.45	1.3									1.3			0.6	1.05
1.3	1.5	1.45	1.3									1.3			0.6	1.05
1.3	1.5	1.45	1.3									1.3			0.6	1.05
1.3	1.5	1.45	1.3									1.3			0.6	1.05
1.35	1.5	1.45	1.3									1.3			0.6	1.05
1.35	1.5	1.5	1.3									1.35			0.6	1.05
1.35	1.5	1.5	1.3									1.35			0.6	1.05
1.35	1.5	1.5	1.3									1.35			0.6	1.05
1.35	1.5	1.5	1.3									1.35			0.6	1.1
1.35	1.5	1.5	1.3									1.35			0.6	1.1
1.35	1.5	1.5	1.3									1.35			0.6	1.1
1.35	1.5	1.5	1.3									1.4			0.6	1.1
1.35	1.5	1.5	1.35									1.4			0.6	1.1
1.35	1.5	1.5	1.35									1.4			0.6	1.1
1.35	1.5	1.5	1.35									1.4			0.6	1.1
1.35	1.5	1.5	1.35									1.4			0.6	1.1
1.35	1.5	1.5	1.35									1.4			0.6	1.1
1.35	1.5	1.5	1.35									1.4			0.6	1.1
1.35	1.5	1.5	1.35									1.4			0.6	1.1
1.35	1.5	1.5	1.35									1.4			0.65	1.15
1.35	1.5	1.5	1.35									1.4			0.65	1.15
1.35	1.5	1.5	1.35									1.45			0.65	1.15
1.35	1.5	1.5	1.35									1.45			0.65	1.15
1.35	1.5	1.5	1.35									1.45			0.65	1.15
1.35	1.5	1.5	1.35									1.45			0.65	1.2
1.35	1.5	1.5	1.35									1.45			0.65	1.2
1.35	1.5	1.5	1.35									1.45			0.65	1.2
1.35	1.5	1.5	1.35									1.45			0.65	1.2
1.35	1.5	1.5	1.35									1.5			0.65	1.2
1.35	1.55	1.5	1.35									1.5			0.65	1.2
1.35	1.55	1.5	1.35									1.5			0.65	1.25
1.35	1.55	1.5	1.35									1.5			0.65	1.25
1.35	1.55	1.5	1.35									1.5			0.65	1.25
1.35	1.55	1.55	1.35									1.5			0.65	1.25
1.35	1.55	1.55	1.35									1.5			0.65	1.25
1.35	1.55	1.55	1.35									1.55			0.65	1.25
1.35	1.55	1.55	1.35									1.55			0.65	1.25
1.35	1.55	1.55	1.35									1.55			0.65	1.25
1.35	1.55	1.55	1.35									1.6			0.65	1.25
1.35	1.55	1.55	1.35									1.6			0.65	1.3
1.35	1.55	1.55	1.35									1.65			0.65	1.3
1.35	1.55	1.55	1.35									1.65			0.65	1.3
1.35	1.55	1.55	1.35									1.65			0.65	1.3
1.35	1.55	1.55	1.35									1.65			0.65	1.3
1.4	1.55	1.55	1.35									1.7			0.65	1.3
1.4	1.55	1.55	1.4									1.7			0.65	1.3
1.4	1.55	1.55	1.4									1.7			0.65	1.3
1.4	1.55	1.55	1.4									1.75			0.65	1.3
1.4	1.55	1.55	1.4									1.85			0.65	1.3
1.4	1.55	1.55	1.4									1.85			0.65	1.3
1.4	1.55	1.55	1.4									1.85			0.65	1.35
1.4	1.55	1.55	1.4									1.9			0.65	1.35
1.4	1.55	1.55	1.4									1.9			0.65	1.35
1.4	1.55	1.55	1.4									1.9			0.65	1.35
1.4	1.55	1.55	1.4									1.9			0.65	1.35
1.4	1.55	1.6	1.4									1.9			0.65	1.35
1.4	1.55	1.6	1.4									1.95			0.65	1.35
1.4	1.55	1.6	1.4									1.95			0.65	1.35
1.4	1.55	1.6	1.4									2			0.65	1.35
1.4	1.55	1.6	1.4									2.05			0.65	1.35
1.4	1.6	1.6	1.4									2.05			0.65	1.4
1.4	1.6	1.6	1.4									2.1			0.65	1.4
1.4	1.6	1.6	1.4									2.25			0.65	1.4
1.4	1.6	1.6	1.4									2.25			0.7	1.4
1.4	1.6	1.6	1.4									2.25			0.7	1.4
1.4	1.6	1.6	1.4									2.25			0.7	1.4
1.4	1.6	1.6	1.4									2.25			0.7	1.45
1.4	1.6	1.6	1.4									2.35			0.7	1.45
1.4	1.6	1.6	1.45									2.6			0.7	1.45
1.45	1.6	1.6	1.45									2.65			0.7	1.45
1.45	1.6	1.65	1.45									2.65			0.7	1.45
1.45	1.6	1.65	1.45									2.75			0.7	1.5
1.45	1.6	1.65	1.45									2.8			0.7	1.5
1.45	1.65	1.65	1.45									3.05			0.7	1.5
1.45	1.65	1.65	1.45									3.6			0.7	1.55
1.45	1.65	1.65	1.45									3.65			0.7	1.55
1.45	1.65	1.65	1.45									4.1			0.7	1.55
1.45	1.65	1.65	1.45									4.2			0.7	1.55
1.45	1.65	1.65	1.45												0.7	1.55
1.45	1.65	1.65	1.45												0.7	1.6
1.45	1.65	1.65	1.45												0.7	1.6
1.45	1.65	1.65	1.45												0.7	1.6
1.45	1.65	1.65	1.45												0.7	1.6
1.45	1.65	1.65	1.45												0.7	1.6
1.45	1.65	1.65	1.45												0.7	1.65
1.45	1.65	1.65	1.5												0.7	1.65
1.45	1.65	1.65	1.5												0.7	1.65
1.45	1.65	1.65	1.5												0.7	1.65
1.45	1.65	1.65	1.5												0.7	1.65
1.45	1.65	1.65	1.5												0.7	1.65
1.45	1.65	1.65	1.5												0.7	1.7
1.45	1.65	1.7	1.5												0.7	1.75
1.45	1.65	1.7	1.5												0.7	1.75
1.45	1.65	1.7	1.5												0.7	1.8
1.45	1.7	1.7	1.5												0.7	1.8
1.45	1.7	1.7	1.5												0.7	1.8
1.45	1.7	1.7	1.5												0.75	1.8
1.45	1.7	1.7	1.5												0.75	1.8
1.45	1.7	1.7	1.5												0.75	1.85
1.5	1.7	1.7	1.5												0.75	1.85
1.5	1.7	1.7	1.5												0.75	1.85
1.5	1.7	1.7	1.5												0.75	1.85
1.5	1.7	1.7	1.5												0.75	1.9
1.5	1.7	1.7	1.5												0.75	1.9
1.5	1.7	1.7	1.5												0.75	1.9
1.5	1.7	1.7	1.5												0.75	2
1.5	1.7	1.7	1.5												0.75	2
1.5	1.7	1.7	1.5												0.75	2.05
1.5	1.7	1.7	1.5												0.75	2.1
1.5	1.7	1.7	1.5												0.75	2.15
1.5	1.7	1.7	1.5												0.75	2.4
1.5	1.7	1.7	1.5												0.75	2.45
1.5	1.7	1.7	1.55												0.75	2.65
1.5	1.75	1.7	1.55												0.75	2.65
1.5	1.75	1.7	1.55												0.75	2.7
1.5	1.75	1.7	1.55												0.75	3
1.5	1.75	1.75	1.55												0.75	3.15
1.5	1.75	1.75	1.55												0.75
1.5	1.75	1.75	1.55												0.75
1.5	1.75	1.75	1.55												0.75
1.5	1.75	1.75	1.55												0.75
1.5	1.75	1.75	1.55												0.75
1.5	1.75	1.75	1.55												0.75
1.5	1.75	1.75	1.55												0.75
1.5	1.75	1.8	1.55												0.75
1.55	1.75	1.8	1.55												0.75
1.55	1.75	1.8	1.55												0.75
1.55	1.75	1.8	1.55												0.75
1.55	1.75	1.8	1.55												0.75
1.55	1.75	1.8	1.6												0.75
1.55	1.75	1.8	1.6												0.75
1.55	1.8	1.8	1.6												0.75
1.55	1.8	1.8	1.6												0.75
1.55	1.8	1.8	1.6												0.8
1.55	1.8	1.8	1.6												0.8
1.55	1.8	1.8	1.6												0.8
1.55	1.8	1.8	1.6												0.8
1.55	1.8	1.8	1.6												0.8
1.55	1.8	1.8	1.6												0.8
1.55	1.8	1.85	1.6												0.8
1.55	1.8	1.85	1.6												0.8
1.55	1.8	1.85	1.6												0.8
1.55	1.8	1.85	1.6												0.8
1.55	1.8	1.85	1.6												0.8
1.55	1.8	1.85	1.6												0.8
1.55	1.8	1.85	1.6												0.8
1.55	1.8	1.85	1.6												0.8
1.55	1.8	1.85	1.6												0.8
1.55	1.85	1.85	1.65												0.8
1.55	1.85	1.85	1.65												0.8
1.55	1.85	1.85	1.65												0.8
1.55	1.85	1.85	1.65												0.8
1.55	1.85	1.85	1.65												0.8
1.55	1.85	1.85	1.65												0.8
1.55	1.85	1.85	1.65												0.8
1.55	1.85	1.85	1.65												0.8
1.55	1.85	1.85	1.65												0.8
1.6	1.85	1.85	1.65												0.8
1.6	1.85	1.85	1.65												0.8
1.6	1.85	1.85	1.65												0.8
1.6	1.85	1.85	1.65												0.8
1.6	1.85	1.9	1.65												0.8
1.6	1.85	1.9	1.7												0.8
1.6	1.85	1.9	1.7												0.8
1.6	1.85	1.9	1.7												0.8
1.6	1.85	1.9	1.7												0.8
1.6	1.85	1.9	1.7												0.8
1.6	1.9	1.9	1.7												0.8
1.6	1.9	1.9	1.7												0.8
1.6	1.9	1.9	1.7												0.85
1.6	1.9	1.9	1.7												0.85
1.6	1.9	1.9	1.7												0.85
1.6	1.9	1.9	1.7												0.85
1.6	1.9	1.9	1.7												0.85
1.6	1.9	1.9	1.7												0.85
1.6	1.9	1.9	1.7												0.85
1.6	1.9	1.9	1.7												0.85
1.6	1.9	1.95	1.7												0.85
1.6	1.9	1.95	1.75												0.85
1.6	1.9	1.95	1.75												0.85
1.6	1.9	1.95	1.75												0.85
1.6	1.9	1.95	1.75												0.85
1.6	1.9	1.95	1.75												0.85
1.6	1.9	1.95	1.75												0.85
1.6	1.9	1.95	1.75												0.85
1.6	1.9	1.95	1.75												0.85
1.6	1.9	1.95	1.75												0.85
1.6	1.95	1.95	1.75												0.85
1.6	1.95	1.95	1.75												0.85
1.65	1.95	1.95	1.75												0.85
1.65	1.95	1.95	1.75												0.85
1.65	1.95	1.95	1.75												0.85
1.65	1.95	1.95	1.75												0.9
1.65	1.95	1.95	1.75												0.9
1.65	1.95	1.95	1.75												0.9
1.65	1.95	2	1.75												0.9
1.65	1.95	2	1.75												0.9
1.65	1.95	2	1.75												0.9
1.65	1.95	2	1.75												0.9
1.65	1.95	2	1.75												0.9
1.65	1.95	2	1.75												0.9
1.65	1.95	2	1.75												0.9
1.65	2	2	1.8												0.9
1.65	2	2	1.8												0.9
1.65	2	2	1.8												0.9
1.65	2	2	1.8												0.9
1.65	2	2	1.8												0.9
1.65	2	2	1.8												0.9
1.65	2	2	1.8												0.9
1.65	2	2	1.8												0.9
1.65	2	2	1.8												0.9
1.7	2	2	1.8												0.9
1.7	2	2	1.8												0.9
1.7	2	2	1.8												0.9
1.7	2	2.05	1.8												0.9
1.7	2	2.05	1.8												0.95
1.7	2	2.05	1.8												0.95
1.7	2	2.05	1.8												0.95
1.7	2	2.05	1.8												0.95
1.7	2	2.05	1.8												0.95
1.7	2	2.05	1.8												0.95
1.7	2	2.05	1.85												0.95
1.7	2	2.05	1.85												0.95
1.7	2	2.05	1.85												0.95
1.7	2.05	2.1	1.85												0.95
1.7	2.05	2.1	1.85												0.95
1.7	2.05	2.1	1.85												0.95
1.7	2.05	2.1	1.85												0.95
1.7	2.05	2.1	1.85												0.95
1.7	2.05	2.1	1.85												0.95
1.7	2.05	2.1	1.85												0.95
1.7	2.05	2.1	1.85												0.95
1.7	2.05	2.1	1.85												0.95
1.7	2.05	2.1	1.85												0.95
1.7	2.05	2.1	1.85												0.95
1.7	2.05	2.1	1.85												0.95
1.75	2.05	2.15	1.85												0.95
1.75	2.05	2.15	1.85												0.95
1.75	2.05	2.15	1.9												0.95
1.75	2.05	2.15	1.9												0.95
1.75	2.1	2.15	1.9												0.95
1.75	2.1	2.15	1.9												0.95
1.75	2.1	2.15	1.9												1
1.75	2.1	2.15	1.9												1
1.75	2.1	2.15	1.9												1
1.75	2.1	2.15	1.9												1
1.75	2.1	2.15	1.9												1
1.75	2.1	2.15	1.9												1
1.75	2.1	2.15	1.9												1
1.75	2.1	2.2	1.9												1
1.75	2.15	2.2	1.9												1
1.75	2.15	2.2	1.9												1
1.75	2.15	2.2	1.9												1
1.75	2.15	2.2	1.95												1
1.75	2.15	2.2	1.95												1
1.75	2.15	2.2	1.95												1
1.8	2.15	2.2	1.95												1
1.8	2.15	2.2	1.95												1
1.8	2.15	2.2	1.95												1.05
1.8	2.15	2.2	1.95												1.05
1.8	2.15	2.2	1.95												1.05
1.8	2.15	2.2	1.95												1.05
1.8	2.15	2.25	1.95												1.05
1.8	2.15	2.25	1.95												1.05
1.8	2.15	2.25	1.95												1.05
1.8	2.15	2.25	2												1.05
1.8	2.2	2.25	2												1.05
1.8	2.2	2.25	2												1.05
1.8	2.2	2.25	2												1.05
1.8	2.2	2.25	2												1.05
1.8	2.2	2.25	2												1.05
1.8	2.2	2.3	2												1.05
1.8	2.2	2.3	2												1.05
1.8	2.2	2.3	2												1.05
1.8	2.2	2.3	2												1.05
1.8	2.2	2.3	2												1.1
1.8	2.2	2.3	2												1.1
1.8	2.2	2.3	2												1.1
1.8	2.2	2.3	2												1.1
1.85	2.2	2.3	2												1.1
1.85	2.2	2.3	2												1.1
1.85	2.2	2.3	2												1.1
1.85	2.2	2.3	2												1.1
1.85	2.2	2.3	2.05												1.1
1.85	2.25	2.35	2.05												1.1
1.85	2.25	2.35	2.05												1.1
1.85	2.25	2.35	2.05												1.1
1.85	2.25	2.35	2.05												1.1
1.85	2.25	2.35	2.05												1.1
1.85	2.25	2.35	2.05												1.1
1.85	2.25	2.35	2.05												1.1
1.85	2.25	2.35	2.05												1.1
1.85	2.25	2.35	2.05												1.1
1.85	2.25	2.35	2.05												1.1
1.85	2.25	2.35	2.05												1.1
1.85	2.25	2.35	2.05												1.1
1.85	2.25	2.4	2.05												1.1
1.85	2.25	2.4	2.1												1.1
1.85	2.25	2.4	2.1												1.15
1.9	2.25	2.4	2.1												1.15
1.9	2.3	2.4	2.1												1.15
1.9	2.3	2.4	2.1												1.15
1.9	2.3	2.4	2.1												1.15
1.9	2.3	2.4	2.1												1.15
1.9	2.3	2.4	2.1												1.15
1.9	2.3	2.4	2.1												1.15
1.9	2.3	2.4	2.1												1.15
1.9	2.3	2.4	2.1												1.15
1.9	2.3	2.4	2.1												1.15
1.9	2.3	2.4	2.1												1.15
1.9	2.3	2.4	2.1												1.15
1.9	2.3	2.4	2.1												1.15
1.9	2.3	2.4	2.1												1.15
1.9	2.3	2.4	2.1												1.15
1.9	2.35	2.45	2.1												1.2
1.9	2.35	2.45	2.1												1.2
1.9	2.35	2.45	2.15												1.2
1.9	2.35	2.45	2.15												1.2
1.9	2.35	2.45	2.15												1.2
1.9	2.35	2.45	2.15												1.2
1.9	2.35	2.45	2.15												1.2
1.9	2.35	2.45	2.15												1.25
1.9	2.35	2.45	2.15												1.25
1.9	2.35	2.45	2.15												1.25
1.95	2.4	2.45	2.15												1.25
1.95	2.4	2.45	2.15												1.25
1.95	2.4	2.45	2.15												1.25
1.95	2.4	2.45	2.15												1.25
1.95	2.4	2.45	2.15												1.25
1.95	2.4	2.45	2.15												1.25
1.95	2.4	2.45	2.15												1.25
1.95	2.4	2.45	2.2												1.25
1.95	2.4	2.5	2.2												1.25
1.95	2.4	2.5	2.2												1.25
1.95	2.4	2.5	2.2												1.3
1.95	2.45	2.5	2.2												1.3
1.95	2.45	2.5	2.2												1.3
1.95	2.45	2.5	2.2												1.3
1.95	2.45	2.5	2.2												1.3
1.95	2.45	2.5	2.2												1.3
1.95	2.45	2.5	2.2												1.3
1.95	2.45	2.5	2.2												1.35
1.95	2.45	2.5	2.2												1.35
2	2.45	2.5	2.2												1.35
2	2.45	2.5	2.2												1.35
2	2.45	2.5	2.2												1.35
2	2.45	2.5	2.2												1.35
2	2.45	2.5	2.25												1.35
2	2.45	2.5	2.25												1.35
2	2.45	2.55	2.25												1.35
2	2.45	2.55	2.25												1.35
2	2.45	2.55	2.25												1.35
2	2.45	2.55	2.25												1.35
2	2.45	2.55	2.25												1.35
2	2.45	2.55	2.25												1.4
2	2.45	2.55	2.25												1.4
2	2.5	2.55	2.25												1.4
2	2.5	2.55	2.25												1.45
2	2.5	2.55	2.25												1.45
2	2.5	2.6	2.25												1.45
2.05	2.5	2.6	2.25												1.45
2.05	2.5	2.6	2.25												1.45
2.05	2.5	2.6	2.25												1.45
2.05	2.5	2.6	2.25												1.45
2.05	2.5	2.6	2.3												1.45
2.05	2.5	2.6	2.3												1.45
2.05	2.5	2.6	2.3												1.5
2.05	2.5	2.6	2.3												1.5
2.05	2.5	2.6	2.3												1.5
2.05	2.5	2.65	2.3												1.5
2.05	2.55	2.65	2.3												1.55
2.05	2.55	2.65	2.3												1.55
2.05	2.55	2.65	2.3												1.55
2.05	2.55	2.65	2.3												1.55
2.05	2.55	2.65	2.3												1.55
2.05	2.55	2.65	2.3												1.55
2.05	2.55	2.7	2.3												1.55
2.05	2.55	2.7	2.3												1.6
2.05	2.55	2.7	2.3												1.6
2.05	2.55	2.7	2.3												1.6
2.05	2.55	2.7	2.3												1.6
2.05	2.6	2.7	2.35												1.65
2.05	2.6	2.7	2.35												1.65
2.05	2.6	2.75	2.35												1.65
2.05	2.6	2.75	2.35												1.65
2.05	2.6	2.75	2.35												1.65
2.1	2.6	2.75	2.35												1.65
2.1	2.65	2.75	2.35												1.65
2.1	2.65	2.8	2.35												1.65
2.1	2.65	2.8	2.35												1.7
2.1	2.65	2.8	2.35												1.7
2.1	2.65	2.8	2.4												1.7
2.1	2.65	2.8	2.4												1.7
2.1	2.65	2.8	2.4												1.7
2.1	2.65	2.85	2.4												1.7
2.1	2.65	2.85	2.4												1.7
2.1	2.7	2.85	2.4												1.75
2.1	2.7	2.85	2.4												1.75
2.1	2.7	2.85	2.4												1.75
2.1	2.7	2.9	2.4												1.8
2.1	2.7	2.9	2.4												1.8
2.1	2.7	2.9	2.4												1.8
2.1	2.7	2.9	2.4												1.8
2.1	2.7	2.9	2.4												1.85
2.1	2.7	2.9	2.45												1.85
2.15	2.7	2.9	2.45												1.85
2.15	2.75	2.9	2.45												1.85
2.15	2.75	2.95	2.45												1.9
2.15	2.75	2.95	2.45												1.9
2.15	2.75	2.95	2.45												1.9
2.15	2.75	2.95	2.45												1.95
2.15	2.75	3	2.45												1.95
2.15	2.75	3	2.45												2
2.15	2.75	3	2.45												2
2.15	2.75	3	2.45												2
2.15	2.75	3	2.45												2
2.15	2.75	3	2.45												2.05
2.15	2.75	3	2.45												2.05
2.15	2.8	3	2.45												2.05
2.15	2.8	3	2.45												2.05
2.15	2.8	3.05	2.5												2.1
2.15	2.8	3.05	2.5												2.1
2.15	2.8	3.05	2.5												2.15
2.15	2.8	3.05	2.5												2.2
2.15	2.8	3.05	2.5												2.25
2.15	2.8	3.05	2.5												2.25
2.2	2.8	3.05	2.5												2.4
2.2	2.8	3.05	2.5												2.45
2.2	2.8	3.05	2.5												2.55
2.2	2.8	3.05	2.5												2.6
2.2	2.85	3.05	2.5												2.8
2.2	2.85	3.1	2.5												2.8
2.2	2.85	3.1	2.5												2.8
2.2	2.85	3.1	2.5												2.9
2.2	2.85	3.1	2.55												3.45
2.2	2.85	3.1	2.55												3.75
2.2	2.85	3.1	2.55												3.8
2.2	2.85	3.1	2.55												3.95
2.2	2.85	3.15	2.55												4
2.2	2.9	3.15	2.55
2.2	2.9	3.15	2.55
2.2	2.9	3.15	2.55
2.25	2.9	3.15	2.55
2.25	2.9	3.15	2.55
2.25	2.9	3.15	2.55
2.25	2.9	3.15	2.55
2.25	2.9	3.15	2.55
2.25	2.9	3.15	2.6
2.25	2.9	3.15	2.6
2.25	2.95	3.2	2.6
2.25	2.95	3.2	2.6
[truncated: 613 more rows]
