# Supplementary material for: Membrane-mediated dimerization potentiates PIP5K lipid kinase activity
Source: eLife. 2022 Aug 17;11:e73747. doi: 10.7554/eLife.73747 (PMC9470164; doi:10.7554/eLife.73747)
Supplement: Figure 3—source data 4. [file elife-73747-fig3-data4.xlsx]

## Sheet: Figure 3F
Figure 3F
Single molecule displacements for Ax647-5KB (+ 50nM dark 5KB) (raw data, sorted) units = µm					Probability Density Ax647-5KB (+ 50nM dark 5KB)						Single molecule displacements for Ax647-5KB (D51R) (+ 50nM dark 5KB) (raw data, sorted) units = µm						Probability Density Ax647-5KB (D15R, + 50nM dark 5KB)
mov1	mov2	mov3	mov4		step size (µm) bin center	mov1	mov2	mov3	mov4		mov1	mov2	mov3	mov4	mov5		step size (µm) bin center	mov1	mov2	mov3	mov4	mov5		FINAL STATISTICS
0.00033	0.00022	0.00055	0.00011		0	0.380409	0.397602	0.376668	0.411829		0.00176	0.00077	0.00066	0.00099	0.00033		0	0.112583	0.104532	0.123457	0.141211	0.0918663		Ax647-5KB(+50nM DARK)	movie	mov1	mov2	mov3	mov4		AVE	SD
0.00033	0.00033	0.00055	0.00044		0.01	3.12238	3.07605	3.04941	3.10488		0.00176	0.00099	0.0011	0.00143	0.00143		0.01	0.748344	0.866124	1.00823	1.12404	1.01053		diffusion coefficient (µm2/sec)	alpha	0.4961	0.496	0.5913	0.4321		0.503875	0.0656182
0.00044	0.00044	0.00066	0.00066		0.02	5.83527	5.82644	5.68875	5.8654		0.00198	0.00209	0.00187	0.00154	0.00154		0.02	1.64238	1.56052	2.01646	2.20289	1.85146			D1	0.02191	0.02246	0.02488	0.02051		0.02244	0.00182207
0.00044	0.00044	0.00077	0.00066		0.03	7.74197	7.54181	7.56809	7.65328		0.00198	0.00275	0.00264	0.00176	0.00297		0.03	2.30464	2.18771	3.07956	3.05581	2.67119			D2	0.06714	0.0654	0.07328	0.06113		0.0667375	0.00503982
0.00055	0.00044	0.00077	0.00077		0.04	8.89832	8.93279	8.94787	8.85222		0.0022	0.00286	0.00286	0.00198	0.00297		0.04	2.72185	3.05383	3.60082	3.40036	3.21532			STEPS	85960	79225	74867	71146		311198
0.00055	0.00055	0.00088	0.00077		0.05	9.13448	9.16756	9.17494	9.11365		0.00231	0.00319	0.00308	0.0022	0.00308		0.05	3.2053	3.44956	4.06722	4.12901	3.56865
0.00055	0.00055	0.00088	0.00077		0.06	9.12634	9.06406	9.23237	9.08414		0.00242	0.0033	0.00319	0.00308	0.00396		0.06	3.68874	3.60636	4.23868	4.38884	4.38132		Ax647-5KB(D51R)(+50nM DARK)	movie	mov1	mov2	mov3	mov4	mov5	AVE	SD
0.00066	0.00055	0.00099	0.00077		0.07	8.49814	8.75607	8.90513	8.87611		0.0033	0.00352	0.0033	0.00319	0.00407		0.07	4.29801	4.24102	4.53361	4.68821	4.38838		diffusion coefficient (µm2/sec)	D1	0.1417	0.1407	0.1263	0.1245	0.134	0.13344	0.00793965
0.00077	0.00066	0.00099	0.00088		0.08	7.99093	7.98233	7.96613	7.77134		0.0033	0.00352	0.0033	0.00319	0.00462		0.08	4.31788	4.13649	4.65021	4.49616	4.64278			STEPS	15100	13393	14580	17704	14151	74928
0.00077	0.00077	0.00099	0.00088		0.09	6.87064	7.08615	7.13131	6.94347		0.0033	0.00385	0.00341	0.0033	0.00462		0.09	4.77483	4.53222	5.12346	5.04971	4.75585
0.00088	0.00088	0.00099	0.00088		0.1	5.87715	5.90596	5.83702	5.79231		0.00418	0.0044	0.00374	0.00341	0.00484		0.1	4.96026	4.68902	4.73251	4.81247	4.77705
0.00088	0.00088	0.0011	0.00099		0.11	5.53164	5.43515	5.52713	5.52666		0.0044	0.00451	0.00418	0.00352	0.00495		0.11	5.17219	5.05488	5.0823	5.07795	5.17278
0.00088	0.00099	0.0011	0.00099		0.12	3.953	4.05175	3.96169	4.06629		0.0044	0.00462	0.00473	0.00363	0.00495		0.12	4.90728	5.05488	4.74623	4.57524	4.57212
0.00088	0.00099	0.0011	0.00099		0.13	3.23057	3.25024	3.29918	3.31291		0.00451	0.00462	0.00473	0.00363	0.00506		0.13	4.63576	4.92795	4.62277	4.40578	4.26825
0.00099	0.0011	0.00121	0.00099		0.14	2.56864	2.60019	2.59527	2.68321		0.00451	0.00506	0.00473	0.00374	0.00517		0.14	4.60265	4.53222	4.1358	4.5244	4.38838
0.00099	0.0011	0.00121	0.00099		0.15	2.07073	2.15967	2.03561	2.06336		0.00451	0.00506	0.00484	0.00396	0.00528		0.15	4.58278	4.46502	4.0192	4.12901	4.07038
0.0011	0.0011	0.00121	0.00099		0.16	1.66356	1.56769	1.59082	1.57844		0.00484	0.00517	0.00495	0.00407	0.00528		0.16	4.00662	4.07676	3.79287	3.95391	3.78065
0.0011	0.00121	0.00132	0.00099		0.17	1.27152	1.31524	1.16607	1.27906		0.00506	0.00539	0.00495	0.00418	0.00539		0.17	4.21192	4.12156	3.55281	3.49638	3.75945
0.0011	0.00121	0.00143	0.0011		0.18	1.09702	1.05901	1.03784	1.00779		0.00528	0.00539	0.00506	0.00418	0.00561		0.18	3.76159	3.79303	3.72428	3.30999	3.44145
0.00121	0.00121	0.00143	0.0011		0.19	0.912052	0.865888	0.785393	0.941725		0.00539	0.00572	0.00506	0.00451	0.00572		0.19	3.40397	3.40476	3.12071	3.07275	3.22945
0.00121	0.00121	0.00143	0.00121		0.2	0.673569	0.69675	0.633123	0.670452		0.00539	0.00583	0.00517	0.00451	0.00583		0.2	3.19205	2.95677	2.88752	2.76209	2.94679
0.00121	0.00132	0.00143	0.00121		0.21	0.623546	0.523825	0.527602	0.53833		0.00583	0.00616	0.00528	0.00451	0.00594		0.21	2.92053	2.88957	2.55144	2.60958	2.60759
0.00121	0.00143	0.00154	0.00121		0.22	0.504886	0.43042	0.532945	0.431507		0.00594	0.00616	0.00561	0.00451	0.00594		0.22	2.69536	2.41917	2.39369	2.40624	2.52279
0.00132	0.00143	0.00154	0.00132		0.23	0.393206	0.330704	0.379339	0.341551		0.00605	0.00616	0.00605	0.00484	0.00594		0.23	2.17881	2.32958	2.02332	2.0052	2.31786
0.00132	0.00143	0.00165	0.00132		0.24	0.322243	0.268855	0.26714	0.260029		0.00616	0.00649	0.00605	0.00484	0.00605		0.24	2.25828	2.00105	1.71468	1.75667	1.96453
0.00132	0.00154	0.00165	0.00132		0.25	0.255933	0.244872	0.253783	0.251595		0.00627	0.00649	0.00616	0.00539	0.00605		0.25	1.91391	1.70238	1.52949	1.51943	1.68893
0.00132	0.00154	0.00165	0.00132		0.26	0.204746	0.169139	0.168298	0.179912		0.00638	0.00671	0.00638	0.00539	0.00605		0.26	1.65563	1.38879	1.46091	1.34433	1.44159
0.00143	0.00154	0.00165	0.00132		0.27	0.182643	0.147681	0.157613	0.168667		0.00649	0.00682	0.00638	0.00561	0.00616		0.27	1.27815	1.44852	1.24829	1.06756	1.37093
0.00143	0.00154	0.00165	0.00132		0.28	0.119823	0.131272	0.109528	0.102606		0.0066	0.00704	0.00649	0.00561	0.00616		0.28	1.24503	1.16479	1.08368	1.16358	1.1236
0.00143	0.00154	0.00176	0.00132		0.29	0.0942299	0.107289	0.101513	0.104011		0.00671	0.00704	0.00649	0.00572	0.0066		0.29	1.07285	0.910924	1.11111	0.785133	1.0812
0.00143	0.00165	0.00176	0.00132		0.3	0.0930665	0.0694225	0.0734636	0.0801169		0.00671	0.00704	0.00682	0.00572	0.00682		0.3	0.986755	0.948257	0.884774	0.751243	0.84093
0.00143	0.00165	0.00176	0.00143		0.31	0.0791066	0.0504891	0.0747993	0.0590335		0.00682	0.00704	0.00715	0.00572	0.00693		0.31	0.788079	0.791458	0.720165	0.581789	0.75613
0.00143	0.00165	0.00176	0.00143		0.32	0.0779432	0.0479647	0.0414068	0.0562224		0.00693	0.00748	0.00737	0.00572	0.00693		0.32	0.701987	0.866124	0.596708	0.734297	0.685464
0.00154	0.00165	0.00176	0.00143		0.33	0.0535133	0.0492269	0.0427425	0.0534113		0.00693	0.00759	0.00737	0.00594	0.00704		0.33	0.529801	0.58986	0.493827	0.54225	0.537065
0.00154	0.00165	0.00176	0.00143		0.34	0.0465333	0.0467024	0.0400711	0.0379501		0.00693	0.00759	0.00748	0.00627	0.00704		0.34	0.596026	0.507728	0.521262	0.593086	0.593598
0.00154	0.00176	0.00176	0.00154		0.35	0.0407166	0.0366046	0.0347283	0.035139		0.00693	0.0077	0.00748	0.00627	0.00737		0.35	0.443709	0.455462	0.397805	0.54225	0.445198
0.00154	0.00187	0.00187	0.00154		0.36	0.0360633	0.0340802	0.036064	0.0238945		0.00726	0.00781	0.00759	0.00638	0.00748		0.36	0.364238	0.358396	0.384088	0.355852	0.317999
0.00154	0.00187	0.00187	0.00154		0.37	0.0255933	0.0239823	0.026714	0.0267056		0.00748	0.00814	0.00759	0.00638	0.00748		0.37	0.311258	0.321063	0.308642	0.32761	0.233199
0.00165	0.00187	0.00187	0.00154		0.38	0.0255933	0.0176712	0.0253783	0.0295168		0.00748	0.00825	0.00781	0.00671	0.00759		0.38	0.324503	0.298663	0.315501	0.271125	0.317999
0.00176	0.00187	0.00187	0.00165		0.39	0.02094	0.0227201	0.0186998	0.0210834		0.00748	0.00825	0.00781	0.00693	0.00781		0.39	0.13245	0.298663	0.253772	0.203344	0.289732
0.00176	0.00187	0.00187	0.00165		0.4	0.01745	0.016409	0.0146927	0.0210834		0.0077	0.00836	0.00803	0.00693	0.00792		0.4	0.205298	0.179198	0.192044	0.271125	0.155466
0.00176	0.00187	0.00187	0.00165		0.41	0.0197766	0.0151467	0.0146927	0.0112445		0.00781	0.00836	0.00803	0.00693	0.00792		0.41	0.165563	0.238931	0.185185	0.163805	0.219066
0.00176	0.00198	0.00187	0.00165		0.42	0.0127966	0.0201956	0.0146927	0.022489		0.00781	0.00847	0.00803	0.00693	0.00792		0.42	0.152318	0.141865	0.130316	0.18075	0.162533
0.00176	0.00198	0.00187	0.00165		0.43	0.0162866	0.00883559	0.0120213	0.0154612		0.00803	0.00847	0.00814	0.00693	0.00792		0.43	0.0927152	0.119465	0.0823045	0.135563	0.169599
0.00187	0.00198	0.00187	0.00165		0.44	0.01396	0.0126223	0.0186998	0.01265		0.00803	0.00858	0.00814	0.00704	0.00803		0.44	0.0596026	0.0970656	0.109739	0.135563	0.0847997
0.00187	0.00198	0.00187	0.00165		0.45	0.00697999	0.0126223	0.013357	0.0154612		0.00814	0.0088	0.00814	0.00737	0.00803		0.45	0.13245	0.0970656	0.0823045	0.129914	0.134266
0.00187	0.00198	0.00187	0.00165		0.46	0.01396	0.0151467	0.0120213	0.0196778		0.00847	0.0088	0.00825	0.00737	0.00814		0.46	0.112583	0.126932	0.0685871	0.10732	0.127199
0.00187	0.00198	0.00198	0.00165		0.47	0.00581666	0.00883559	0.0146927	0.0112445		0.00869	0.00891	0.00825	0.00748	0.00814		0.47	0.112583	0.0821325	0.048011	0.0847266	0.077733
0.00187	0.00209	0.00198	0.00176		0.48	0.00814332	0.00757337	0.0146927	0.0140556		0.00891	0.00902	0.00836	0.00748	0.00825		0.48	0.10596	0.111999	0.102881	0.124266	0.113066
0.00187	0.00209	0.00198	0.00176		0.49	0.0127966	0.00757337	0.00934991	0.0070278		0.00891	0.00902	0.00847	0.00748	0.00825		0.49	0.0529801	0.119465	0.0891632	0.0734297	0.0918663
0.00198	0.00209	0.00198	0.00176		0.5	0.01047	0.0113601	0.013357	0.0140556		0.00891	0.00902	0.00847	0.00759	0.00847		0.5	0.0927152	0.0522661	0.0754458	0.0847266	0.0565331
0.00198	0.0022	0.0022	0.00176		0.51	0.00930665	0.00883559	0.0106856	0.00983892		0.00902	0.00913	0.00858	0.00759	0.0088		0.51	0.0264901	0.0821325	0.048011	0.0621329	0.106
0.00198	0.0022	0.0022	0.00176		0.52	0.00697999	0.00631114	0.00801421	0.01265		0.00924	0.00913	0.0088	0.00759	0.0088		0.52	0.0596026	0.0447995	0.0548697	0.0621329	0.0918663
0.00198	0.0022	0.0022	0.00176		0.53	0.0116333	0.00883559	0.0120213	0.00562224		0.00924	0.00924	0.0088	0.0077	0.00902		0.53	0.0596026	0.0597327	0.048011	0.0847266	0.0353332
0.00198	0.0022	0.0022	0.00176		0.54	0.01047	0.0113601	0.0106856	0.00983892		0.00935	0.00924	0.00902	0.0077	0.00913		0.54	0.0662252	0.0447995	0.0342936	0.101672	0.106
0.00209	0.0022	0.0022	0.00187		0.55	0.00930665	0.00757337	0.0146927	0.00983892		0.00935	0.00946	0.00924	0.0077	0.00913		0.55	0.0529801	0.0671993	0.0617284	0.0621329	0.0494665
0.00209	0.0022	0.0022	0.00187		0.56	0.00697999	0.0138845	0.0120213	0.0168667		0.00946	0.00957	0.00935	0.00781	0.00924		0.56	0.0529801	0.0522661	0.0205761	0.0734297	0.077733
0.0022	0.00231	0.0022	0.00187		0.57	0.00697999	0.00883559	0.00801421	0.0168667		0.00957	0.00957	0.00935	0.00781	0.00935		0.57	0.0331126	0.0746659	0.0823045	0.0790782	0.0565331
0.0022	0.00231	0.00231	0.00187		0.58	0.00930665	0.00504891	0.013357	0.00983892		0.00979	0.00957	0.00946	0.00792	0.00935		0.58	0.0794702	0.0447995	0.0548697	0.0395391	0.0494665
0.0022	0.00231	0.00231	0.00198		0.59	0.00465333	0.0113601	0.00534281	0.00843336		0.01001	0.00957	0.00957	0.00803	0.00946		0.59	0.0662252	0.0298663	0.0274348	0.0451875	0.0565331
0.0022	0.00231	0.00231	0.00198		0.6	0.01047	0.00631114	0.00534281	0.0070278		0.01012	0.01001	0.00957	0.00803	0.00946		0.6	0.0463576	0.0522661	0.0685871	0.0225938	0.0635997
0.00231	0.00231	0.00231	0.00198		0.61	0.00814332	0.0176712	0.0013357	0.0196778		0.01023	0.01012	0.00968	0.00803	0.00957		0.61	0.0397351	0.0447995	0.0274348	0.0621329	0.0494665
0.00231	0.00231	0.00231	0.00198		0.62	0.01047	0.00883559	0.0120213	0.00983892		0.01023	0.01023	0.00979	0.00803	0.00957		0.62	0.0331126	0.0149332	0.0617284	0.0338906	0.0706664
0.00231	0.00231	0.00231	0.00198		0.63	0.00581666	0.00631114	0.0106856	0.00562224		0.01034	0.01034	0.00979	0.00814	0.00957		0.63	0.0264901	0.0671993	0.0205761	0.050836	0.0494665
0.00231	0.00231	0.00231	0.00198		0.64	0.00581666	0.0100978	0.00400711	0.00843336		0.01056	0.01045	0.01001	0.00814	0.00968		0.64	0.0463576	0.0671993	0.048011	0.0564844	0.077733
0.00242	0.00231	0.00231	0.00209		0.65	0.0127966	0.00757337	0.00934991	0.00562224		0.01078	0.01056	0.01001	0.00836	0.00968		0.65	0.00662252	0.0373329	0.048011	0.0112969	0.0423998
0.00242	0.00231	0.00231	0.00209		0.66	0.00814332	0.00883559	0.013357	0.00843336		0.01078	0.01056	0.01001	0.00836	0.00968		0.66	0.0264901	0.0447995	0.0205761	0.0847266	0.0494665
0.00242	0.00231	0.00242	0.00209		0.67	0.00581666	0.00126223	0.0106856	0.00983892		0.01089	0.01067	0.01023	0.00836	0.00979		0.67	0.00662252	0.0522661	0.0342936	0.0790782	0.0423998
0.00242	0.00242	0.00242	0.00209		0.68	0.00581666	0.0100978	0.00667851	0.00562224		0.01111	0.01067	0.01034	0.00847	0.00979		0.68	0.0331126	0.0597327	0.0617284	0.0338906	0.0494665
0.00242	0.00242	0.00242	0.00209		0.69	0.00930665	0.00252446	0.0106856	0.00421668		0.01111	0.01067	0.01045	0.00847	0.01012		0.69	0.0529801	0.0223998	0.0137174	0.0282422	0.0706664
0.00242	0.00242	0.00242	0.0022		0.7	0.00581666	0.00378668	0.0026714	0.00421668		0.01122	0.01089	0.01045	0.00858	0.01012		0.7	0.0397351	0.0298663	0.048011	0.0677813	0.0635997
0.00242	0.00242	0.00242	0.0022		0.71	0.00581666	0.00252446	0.00534281	0.0070278		0.01122	0.011	0.01045	0.00858	0.01045		0.71	0.0463576	0.0298663	0.0342936	0.0282422	0.0353332
0.00242	0.00242	0.00253	0.0022		0.72	0.00930665	0.00378668	0.00534281	0.01265		0.01144	0.011	0.01045	0.00858	0.01056		0.72	0.0264901	0.0746659	0.0342936	0.050836	0.0494665
0.00242	0.00242	0.00253	0.0022		0.73	0.00814332	0.0138845	0.0026714	0.00562224		0.01155	0.01111	0.01067	0.00869	0.01056		0.73	0.0463576	0.0149332	0.0205761	0.0338906	0.077733
0.00253	0.00242	0.00253	0.00231		0.74	0.00349	0.00504891	0.00801421	0.00843336		0.01155	0.01111	0.01067	0.00869	0.01067		0.74	0.0264901	0.0522661	0.0411523	0.0225938	0.0635997
0.00253	0.00242	0.00253	0.00231		0.75	0.01047	0.00757337	0.00801421	0.00140556		0.01188	0.01111	0.01067	0.0088	0.01067		0.75	0.0397351	0.0597327	0.048011	0.050836	0.0706664
0.00253	0.00242	0.00253	0.00231		0.76	0.00697999	0.00883559	0.0026714	0.0112445		0.01199	0.01122	0.01067	0.0088	0.01067		0.76	0.013245	0.0298663	0.0617284	0.0395391	0.0211999
0.00253	0.00242	0.00264	0.00231		0.77	0.00465333	0.00631114	0.00667851	0.0070278		0.0121	0.01122	0.01078	0.0088	0.01067		0.77	0.013245	0.0223998	0.0205761	0.0395391	0.0141333
0.00253	0.00253	0.00264	0.00231		0.78	0	0.00883559	0.00534281	0.00562224		0.0121	0.01144	0.01078	0.00891	0.01067		0.78	0	0.0522661	0.0274348	0.0282422	0.0353332
0.00253	0.00253	0.00264	0.00231		0.79	0	0.00631114	0.00534281	0.00281112		0.0121	0.01144	0.011	0.00902	0.01067		0.79	0	0.0671993	0	0.0282422	0.0211999
0.00253	0.00253	0.00264	0.00242		0.8	0	0	0.00667851	0.0070278		0.01221	0.01155	0.011	0.00913	0.01078		0.8	0	0.0597327	0.0274348	0.0395391	0.0282666
0.00253	0.00253	0.00264	0.00242		0.81	0	0	0.00801421	0.00281112		0.01221	0.01155	0.011	0.00924	0.01089		0.81	0	0.0223998	0.0342936	0.0395391	0.0353332
0.00253	0.00253	0.00264	0.00242		0.82	0	0.0100978	0.00534281	0.00140556		0.01232	0.01155	0.01122	0.00924	0.01089		0.82	0	0.0298663	0.0274348	0.0338906	0.0353332
0.00264	0.00253	0.00264	0.00242		0.83	0	0.00252446	0.00534281	0.0070278		0.01243	0.01155	0.01122	0.00946	0.01089		0.83	0	0.0223998	0.0274348	0.0225938	0.0494665
0.00264	0.00253	0.00264	0.00242		0.84	0	0.00757337	0.00534281	0.0070278		0.01243	0.01155	0.01122	0.00957	0.011		0.84	0	0.0373329	0.0205761	0.0282422	0
0.00264	0.00253	0.00264	0.00242		0.85	0	0.00883559	0.00934991	0.00281112		0.01254	0.01177	0.01133	0.00957	0.011		0.85	0	0.0671993	0	0.0282422	0.0353332
0.00264	0.00253	0.00275	0.00242		0.86	0	0.00378668	0.00667851	0.0070278		0.01254	0.01177	0.01133	0.00957	0.011		0.86	0	0	0.0274348	0.00564844	0.0141333
0.00264	0.00253	0.00275	0.00253		0.87	0	0.00631114	0.00801421	0.00843336		0.01276	0.01177	0.01133	0.00968	0.011		0.87	0	0.00746659	0.0411523	0.0225938	0.0141333
0.00264	0.00253	0.00275	0.00253		0.88	0	0.00252446	0.00400711	0.00843336		0.01287	0.01199	0.01144	0.00968	0.01111		0.88	0	0.0298663	0.0274348	0.0395391	0.0211999
0.00264	0.00264	0.00275	0.00253		0.89	0	0.00378668	0.00934991	0.0070278		0.01298	0.01199	0.01166	0.00968	0.01111		0.89	0	0.00746659	0.00685871	0.0282422	0.0211999
0.00264	0.00264	0.00275	0.00253		0.9	0	0.00504891	0.00400711	0.0112445		0.01298	0.0121	0.01177	0.00979	0.01111		0.9	0	0.00746659	0.0342936	0.0451875	0.0353332
0.00275	0.00264	0.00275	0.00253		0.91	0	0.00631114	0.00801421	0.0070278		0.01298	0.01221	0.01177	0.00979	0.01122		0.91	0	0.0298663	0.0617284	0.0225938	0.0423998
0.00275	0.00264	0.00275	0.00264		0.92	0	0.0100978	0.00400711	0.00421668		0.01298	0.01221	0.01188	0.0099	0.01122		0.92	0	0.0149332	0.0274348	0.0225938	0.0282666
0.00275	0.00264	0.00275	0.00264		0.93	0	0.00378668	0.00400711	0.0070278		0.01309	0.01232	0.01199	0.01001	0.01133		0.93	0	0.0223998	0.0274348	0.0169453	0.0282666
0.00275	0.00264	0.00275	0.00264		0.94	0	0.00378668	0.0120213	0.00983892		0.0132	0.01232	0.01199	0.01001	0.01133		0.94	0	0.0223998	0.0274348	0.0169453	0.0211999
0.00275	0.00264	0.00286	0.00264		0.95	0	0.00252446	0.00400711	0.00281112		0.01331	0.01243	0.01199	0.01012	0.01133		0.95	0	0.0223998	0.0205761	0.0112969	0.0141333
0.00275	0.00264	0.00286	0.00264		0.96	0	0.00252446	0.00534281	0.00843336		0.01353	0.01243	0.01199	0.01012	0.01133		0.96	0	0.0223998	0.0205761	0.0169453	0.0282666
0.00275	0.00264	0.00286	0.00264		0.97	0	0.00757337	0.00534281	0.00421668		0.01353	0.01254	0.01199	0.01012	0.01155		0.97	0	0.0223998	0.0274348	0.0169453	0.0211999
0.00275	0.00264	0.00286	0.00275		0.98	0	0.0113601	0.00934991	0.0070278		0.01364	0.01254	0.0121	0.01012	0.01155		0.98	0	0.0223998	0.00685871	0.00564844	0.0423998
0.00286	0.00275	0.00286	0.00275		0.99	0	0.00252446	0.00667851	0.00281112		0.01375	0.01287	0.0121	0.01012	0.01166		0.99	0	0.00746659	0.0411523	0.0112969	0.0565331
0.00286	0.00275	0.00297	0.00275		1	0	0.00631114	0.00801421	0.0154612		0.01375	0.01309	0.01232	0.01023	0.01166		1	0	0.0373329	0.048011	0.0225938	0.0423998
0.00286	0.00275	0.00297	0.00275		1.01	0	0.00504891	0.0026714	0.00140556		0.01375	0.01309	0.01243	0.01023	0.01166		1.01	0	0	0.0205761	0.0395391	0.0423998
0.00286	0.00275	0.00297	0.00275		1.02	0	0.00504891	0.00801421	0.00562224		0.01386	0.0132	0.01243	0.01023	0.01177		1.02	0	0.0149332	0.0205761	0.00564844	0.00706664
0.00286	0.00275	0.00297	0.00286		1.03	0	0.00126223	0.00400711	0.00281112		0.01386	0.01331	0.01243	0.01023	0.01177		1.03	0	0	0	0.0169453	0.0353332
0.00286	0.00286	0.00297	0.00286		1.04	0	0.00504891	0.0120213	0.00140556		0.01386	0.01353	0.01243	0.01023	0.01177		1.04	0	0.0522661	0.0205761	0.00564844	0.0141333
0.00286	0.00286	0.00297	0.00286		1.05	0	0.00631114	0.00801421	0.00140556		0.01386	0.01353	0.01243	0.01034	0.01188		1.05	0	0.0223998	0.0205761	0.0112969	0.0423998
0.00286	0.00286	0.00308	0.00286		1.06	0	0.00631114	0.00400711	0.00281112		0.01386	0.01364	0.01243	0.01034	0.01188		1.06	0	0.0298663	0.0274348	0.0338906	0.0565331
0.00297	0.00286	0.00308	0.00286		1.07	0	0.00252446	0.00400711	0.00562224		0.01386	0.01364	0.01254	0.01034	0.01188		1.07	0	0.0373329	0.0205761	0.0112969	0.00706664
0.00297	0.00286	0.00308	0.00286		1.08	0	0.00126223	0.0013357	0.0112445		0.01397	0.01386	0.01254	0.01034	0.01188		1.08	0	0.0223998	0.0411523	0.0338906	0.0141333
0.00297	0.00286	0.00308	0.00286		1.09	0	0.00126223	0.00801421	0.00983892		0.01397	0.01386	0.01276	0.01045	0.01199		1.09	0	0.0223998	0.0411523	0.0225938	0
0.00297	0.00297	0.00308	0.00286		1.1	0	0.00252446	0.00400711	0.00421668		0.01397	0.01386	0.01276	0.01045	0.0121		1.1	0	0.0149332	0.0137174	0.0112969	0.00706664
0.00297	0.00297	0.00308	0.00297								0.01419	0.01397	0.01276	0.01045	0.0121
0.00297	0.00297	0.00308	0.00297								0.01419	0.01397	0.01276	0.01045	0.0121
0.00297	0.00297	0.00308	0.00297								0.0143	0.01419	0.01276	0.01056	0.01232
0.00297	0.00297	0.00308	0.00297								0.0143	0.0143	0.01287	0.01056	0.01232
0.00297	0.00297	0.00319	0.00297								0.01441	0.01441	0.01287	0.01067	0.01243
0.00297	0.00297	0.00319	0.00297								0.01441	0.01441	0.01287	0.01067	0.01254
0.00297	0.00297	0.00319	0.00297								0.01441	0.01452	0.01287	0.01067	0.01254
0.00297	0.00297	0.00319	0.00297								0.01441	0.01452	0.01287	0.01078	0.01265
0.00308	0.00297	0.00319	0.00297								0.01441	0.01452	0.01309	0.01078	0.01265
0.00308	0.00308	0.00319	0.00308								0.01452	0.01452	0.01309	0.01089	0.01298
0.00308	0.00308	0.00319	0.00308								0.01463	0.01463	0.01309	0.01089	0.01309
0.00308	0.00308	0.0033	0.00308								0.01474	0.01474	0.0132	0.011	0.01309
0.00308	0.00308	0.0033	0.00308								0.01485	0.01496	0.01331	0.011	0.0132
0.00308	0.00308	0.0033	0.00308								0.01485	0.01496	0.01331	0.011	0.01331
0.00308	0.00308	0.0033	0.00308								0.01485	0.01496	0.01331	0.01111	0.01342
0.00308	0.00308	0.0033	0.00308								0.01485	0.01496	0.01342	0.01111	0.01353
0.00308	0.00319	0.0033	0.00319								0.01485	0.01496	0.01342	0.01111	0.01364
0.00319	0.00319	0.00341	0.00319								0.01485	0.01496	0.01342	0.01122	0.01364
0.00319	0.00319	0.00341	0.00319								0.01496	0.01496	0.01353	0.01122	0.01364
0.00319	0.00319	0.00341	0.00319								0.01507	0.01507	0.01353	0.01122	0.01375
0.00319	0.00319	0.00341	0.00319								0.01507	0.01518	0.01353	0.01122	0.01375
0.00319	0.00319	0.00341	0.00319								0.01507	0.01529	0.01353	0.01122	0.01386
0.00319	0.00319	0.00341	0.00319								0.01529	0.01529	0.01364	0.01144	0.01397
0.00319	0.00319	0.00352	0.00319								0.01529	0.0154	0.01364	0.01144	0.01397
0.00319	0.00319	0.00352	0.00319								0.01529	0.01551	0.01364	0.01144	0.01408
0.00319	0.00319	0.00352	0.00319								0.01529	0.01551	0.01375	0.01144	0.01419
0.00319	0.00319	0.00352	0.0033								0.0154	0.01562	0.01375	0.01144	0.01419
0.00319	0.00319	0.00352	0.0033								0.0154	0.01595	0.01386	0.01155	0.01419
0.00319	0.00319	0.00352	0.0033								0.0154	0.01606	0.01386	0.01155	0.01419
0.00319	0.00319	0.00352	0.0033								0.01551	0.01628	0.01386	0.01155	0.01419
0.00319	0.00319	0.00352	0.0033								0.01562	0.01628	0.01397	0.01155	0.0143
0.00319	0.0033	0.00352	0.0033								0.01562	0.01628	0.01408	0.01155	0.01441
0.00319	0.0033	0.00352	0.00341								0.01562	0.01628	0.01408	0.01166	0.01441
0.00319	0.0033	0.00363	0.00341								0.01584	0.01639	0.01408	0.01166	0.01463
0.0033	0.0033	0.00363	0.00341								0.01584	0.01639	0.0143	0.01166	0.01463
0.0033	0.0033	0.00363	0.00341								0.01584	0.01639	0.0143	0.01177	0.01463
0.0033	0.0033	0.00363	0.00341								0.01595	0.01639	0.0143	0.01177	0.01474
0.0033	0.0033	0.00363	0.00341								0.01628	0.0165	0.0143	0.01177	0.01474
0.0033	0.0033	0.00363	0.00341								0.01628	0.01661	0.0143	0.01177	0.01474
0.0033	0.0033	0.00363	0.00352								0.01639	0.01672	0.0143	0.01188	0.01485
0.0033	0.0033	0.00363	0.00352								0.01639	0.01672	0.0143	0.01199	0.01485
0.0033	0.0033	0.00363	0.00352								0.01639	0.01683	0.01441	0.01199	0.01485
0.00341	0.0033	0.00374	0.00352								0.0165	0.01694	0.01452	0.01199	0.01485
0.00341	0.0033	0.00374	0.00352								0.01661	0.01694	0.01452	0.0121	0.01496
0.00341	0.0033	0.00374	0.00352								0.01661	0.01694	0.01452	0.0121	0.01496
0.00341	0.00341	0.00374	0.00352								0.01661	0.01694	0.01463	0.0121	0.01507
0.00341	0.00341	0.00374	0.00352								0.01683	0.01705	0.01463	0.0121	0.01507
0.00341	0.00341	0.00374	0.00352								0.01694	0.01705	0.01474	0.01221	0.01518
0.00341	0.00341	0.00374	0.00352								0.01694	0.01705	0.01474	0.01221	0.01518
0.00341	0.00341	0.00374	0.00352								0.01705	0.01705	0.01474	0.01232	0.01529
0.00341	0.00341	0.00385	0.00363								0.01705	0.01716	0.01474	0.01232	0.01529
0.00352	0.00341	0.00385	0.00363								0.01716	0.01716	0.01474	0.01243	0.01529
0.00352	0.00341	0.00385	0.00363								0.01716	0.01716	0.01485	0.01243	0.01529
0.00352	0.00341	0.00385	0.00363								0.01716	0.01727	0.01485	0.01243	0.01529
0.00352	0.00341	0.00385	0.00363								0.01727	0.01727	0.01507	0.01243	0.01529
0.00352	0.00352	0.00385	0.00363								0.01727	0.01727	0.01518	0.01243	0.0154
0.00352	0.00352	0.00385	0.00363								0.01727	0.01727	0.01518	0.01243	0.0154
0.00352	0.00352	0.00385	0.00363								0.01727	0.01738	0.01518	0.01254	0.0154
0.00363	0.00352	0.00396	0.00363								0.01727	0.01738	0.01518	0.01265	0.01551
0.00363	0.00352	0.00396	0.00363								0.01738	0.0176	0.01518	0.01265	0.01551
0.00363	0.00352	0.00396	0.00363								0.01738	0.0176	0.01529	0.01287	0.01562
0.00363	0.00352	0.00396	0.00363								0.01738	0.01771	0.01529	0.01287	0.01562
0.00363	0.00352	0.00396	0.00374								0.01738	0.01782	0.01529	0.01287	0.01562
0.00363	0.00352	0.00396	0.00374								0.01749	0.01793	0.01529	0.01298	0.01562
0.00363	0.00363	0.00396	0.00374								0.0176	0.01793	0.01529	0.01298	0.01573
0.00363	0.00363	0.00396	0.00374								0.0176	0.01804	0.0154	0.01309	0.01573
0.00363	0.00363	0.00396	0.00374								0.01771	0.01804	0.01562	0.0132	0.01584
0.00363	0.00363	0.00396	0.00374								0.01782	0.01804	0.01562	0.0132	0.01584
0.00363	0.00363	0.00396	0.00374								0.01804	0.01815	0.01562	0.0132	0.01595
0.00363	0.00363	0.00407	0.00374								0.01815	0.01815	0.01573	0.01331	0.01595
0.00363	0.00363	0.00407	0.00374								0.01815	0.01815	0.01573	0.01331	0.01595
0.00363	0.00363	0.00407	0.00374								0.01826	0.01815	0.01573	0.01342	0.01595
0.00363	0.00363	0.00407	0.00374								0.01826	0.01826	0.01584	0.01353	0.01595
0.00363	0.00363	0.00407	0.00374								0.01826	0.01826	0.01584	0.01353	0.01595
0.00363	0.00374	0.00407	0.00385								0.01837	0.01837	0.01595	0.01364	0.01606
0.00363	0.00374	0.00407	0.00385								0.01837	0.01837	0.01595	0.01364	0.01606
0.00363	0.00374	0.00407	0.00385								0.01837	0.01859	0.01595	0.01375	0.01606
0.00374	0.00374	0.00407	0.00385								0.01837	0.01859	0.01595	0.01375	0.01606
0.00374	0.00374	0.00407	0.00385								0.01848	0.01859	0.01606	0.01375	0.01617
0.00374	0.00385	0.00407	0.00385								0.01848	0.01859	0.01606	0.01375	0.01617
0.00374	0.00385	0.00418	0.00385								0.01859	0.0187	0.01606	0.01386	0.01617
0.00374	0.00385	0.00418	0.00385								0.01859	0.0187	0.01617	0.01386	0.01628
0.00374	0.00385	0.00418	0.00385								0.01859	0.01881	0.01617	0.01386	0.01628
0.00374	0.00385	0.00418	0.00385								0.01859	0.01881	0.01617	0.01386	0.01628
0.00374	0.00385	0.00418	0.00385								0.01859	0.01892	0.01628	0.01397	0.01628
0.00374	0.00385	0.00418	0.00385								0.01881	0.01892	0.01628	0.01397	0.01628
0.00374	0.00385	0.00418	0.00385								0.01881	0.01892	0.01639	0.01397	0.01628
0.00374	0.00385	0.00418	0.00396								0.01881	0.01903	0.01639	0.01397	0.01639
0.00385	0.00396	0.00418	0.00396								0.01881	0.01903	0.01639	0.01408	0.01639
0.00385	0.00396	0.00429	0.00396								0.01881	0.01903	0.0165	0.01408	0.01639
0.00385	0.00396	0.00429	0.00396								0.01881	0.01903	0.01661	0.01419	0.01639
0.00385	0.00396	0.00429	0.00396								0.01892	0.01903	0.01661	0.0143	0.0165
0.00385	0.00396	0.00429	0.00396								0.01892	0.01914	0.01661	0.0143	0.0165
0.00385	0.00396	0.00429	0.00396								0.01892	0.01925	0.01672	0.0143	0.0165
0.00385	0.00396	0.00429	0.00407								0.01892	0.01925	0.01672	0.0143	0.0165
0.00385	0.00396	0.00429	0.00407								0.01892	0.01947	0.01672	0.0143	0.01661
0.00385	0.00407	0.0044	0.00407								0.01903	0.01947	0.01683	0.01441	0.01672
0.00385	0.00407	0.0044	0.00407								0.01903	0.01947	0.01683	0.01441	0.01672
0.00396	0.00407	0.0044	0.00407								0.01914	0.01947	0.01683	0.01441	0.01672
0.00396	0.00407	0.0044	0.00407								0.01914	0.01958	0.01694	0.01452	0.01683
0.00396	0.00407	0.0044	0.00407								0.01914	0.01958	0.01694	0.01452	0.01683
0.00396	0.00407	0.0044	0.00407								0.01925	0.01958	0.01705	0.01463	0.01694
0.00396	0.00407	0.0044	0.00418								0.01925	0.01969	0.01716	0.01474	0.01694
0.00396	0.00407	0.0044	0.00418								0.01925	0.0198	0.01716	0.01474	0.01694
0.00396	0.00407	0.0044	0.00418								0.01925	0.0198	0.01716	0.01485	0.01694
0.00407	0.00407	0.0044	0.00418								0.01925	0.01991	0.01716	0.01485	0.01694
0.00407	0.00407	0.0044	0.00418								0.01925	0.01991	0.01716	0.01485	0.01705
0.00407	0.00407	0.0044	0.00429								0.01936	0.01991	0.01727	0.01485	0.01705
0.00407	0.00407	0.0044	0.00429								0.01958	0.01991	0.01727	0.01485	0.01716
0.00407	0.00407	0.0044	0.00429								0.01958	0.02002	0.01727	0.01496	0.01716
0.00407	0.00407	0.0044	0.00429								0.01958	0.02002	0.01727	0.01496	0.01727
0.00407	0.00407	0.00451	0.00429								0.01958	0.02013	0.01727	0.01496	0.01738
0.00407	0.00418	0.00451	0.00429								0.01969	0.02013	0.01738	0.01496	0.01738
0.00407	0.00418	0.00451	0.00429								0.01969	0.02013	0.01738	0.01507	0.01738
0.00418	0.00418	0.00451	0.00429								0.01969	0.02024	0.01749	0.01507	0.01749
0.00418	0.00418	0.00451	0.00429								0.0198	0.02024	0.0176	0.01507	0.01749
0.00418	0.00418	0.00451	0.00429								0.0198	0.02024	0.01771	0.01507	0.0176
0.00418	0.00418	0.00451	0.0044								0.0198	0.02035	0.01771	0.01507	0.0176
0.00418	0.00418	0.00451	0.0044								0.01991	0.02035	0.01771	0.01507	0.01771
0.00418	0.00418	0.00451	0.0044								0.01991	0.02046	0.01782	0.01518	0.01771
0.00418	0.00429	0.00451	0.0044								0.01991	0.02057	0.01782	0.01518	0.01771
0.00418	0.00429	0.00462	0.0044								0.02002	0.02057	0.01782	0.01529	0.01782
0.00418	0.00429	0.00462	0.0044								0.02002	0.02057	0.01782	0.01529	0.01782
0.00418	0.00429	0.00462	0.0044								0.02002	0.02068	0.01782	0.01529	0.01793
0.00418	0.00429	0.00462	0.0044								0.02002	0.02068	0.01793	0.01529	0.01793
0.00418	0.00429	0.00462	0.0044								0.02013	0.02068	0.01793	0.0154	0.01793
0.00418	0.00429	0.00462	0.0044								0.02024	0.02079	0.01804	0.0154	0.01793
0.00418	0.00429	0.00462	0.00451								0.02035	0.02079	0.01815	0.01551	0.01804
0.00418	0.00429	0.00462	0.00451								0.02035	0.0209	0.01826	0.01551	0.01804
0.00418	0.00429	0.00473	0.00451								0.02035	0.0209	0.01826	0.01551	0.01815
0.00429	0.0044	0.00473	0.00451								0.02035	0.02101	0.01826	0.01551	0.01826
0.00429	0.0044	0.00473	0.00451								0.02035	0.02101	0.01826	0.01562	0.01826
0.00429	0.0044	0.00473	0.00462								0.02035	0.02101	0.01826	0.01562	0.01826
0.00429	0.0044	0.00473	0.00462								0.02046	0.02101	0.01837	0.01562	0.01826
0.00429	0.0044	0.00473	0.00462								0.02046	0.02101	0.01837	0.01573	0.01826
0.00429	0.0044	0.00484	0.00462								0.02046	0.02101	0.01837	0.01573	0.01837
0.00429	0.0044	0.00484	0.00462								0.02057	0.02112	0.01848	0.01573	0.01848
0.00429	0.0044	0.00484	0.00462								0.02057	0.02112	0.0187	0.01573	0.01848
0.00429	0.0044	0.00484	0.00462								0.02057	0.02112	0.0187	0.01573	0.01848
0.0044	0.0044	0.00484	0.00462								0.02057	0.02112	0.0187	0.01584	0.01848
0.0044	0.0044	0.00484	0.00462								0.02068	0.02123	0.01881	0.01584	0.01859
0.0044	0.0044	0.00484	0.00462								0.02068	0.02123	0.01892	0.01584	0.01859
0.0044	0.0044	0.00484	0.00462								0.02068	0.02123	0.01892	0.01584	0.0187
0.0044	0.0044	0.00484	0.00462								0.02068	0.02123	0.01903	0.01584	0.0187
0.0044	0.0044	0.00484	0.00473								0.02068	0.02134	0.01903	0.01595	0.0187
0.0044	0.0044	0.00484	0.00473								0.02068	0.02134	0.01914	0.01595	0.0187
0.0044	0.0044	0.00484	0.00473								0.02068	0.02134	0.01925	0.01595	0.01881
0.00451	0.0044	0.00484	0.00473								0.02079	0.02145	0.01925	0.01595	0.01881
0.00451	0.00451	0.00484	0.00473								0.02079	0.02145	0.01925	0.01595	0.01881
0.00451	0.00451	0.00484	0.00473								0.02079	0.02145	0.01936	0.01595	0.01881
0.00451	0.00451	0.00484	0.00473								0.02079	0.02145	0.01936	0.01606	0.01881
0.00451	0.00451	0.00484	0.00473								0.0209	0.02145	0.01936	0.01606	0.01892
0.00451	0.00451	0.00495	0.00473								0.0209	0.02156	0.01936	0.01606	0.01892
0.00451	0.00451	0.00495	0.00473								0.02101	0.02156	0.01936	0.01606	0.01903
0.00451	0.00451	0.00495	0.00473								0.02101	0.02167	0.01936	0.01606	0.01914
0.00451	0.00451	0.00495	0.00473								0.02101	0.02167	0.01947	0.01617	0.01914
0.00451	0.00451	0.00495	0.00473								0.02112	0.02167	0.01947	0.01617	0.01925
0.00451	0.00451	0.00495	0.00473								0.02112	0.02167	0.01958	0.01617	0.01925
0.00451	0.00462	0.00495	0.00484								0.02112	0.02178	0.01958	0.01617	0.01936
0.00451	0.00462	0.00495	0.00484								0.02123	0.02178	0.01958	0.01617	0.01936
0.00451	0.00462	0.00495	0.00484								0.02123	0.02178	0.01969	0.01617	0.01947
0.00451	0.00462	0.00495	0.00484								0.02134	0.02178	0.01969	0.01628	0.01947
0.00462	0.00462	0.00495	0.00484								0.02134	0.02189	0.01969	0.01628	0.01958
0.00462	0.00473	0.00495	0.00484								0.02145	0.022	0.01969	0.01628	0.01969
0.00462	0.00473	0.00495	0.00484								0.02145	0.02211	0.01969	0.01639	0.0198
0.00462	0.00473	0.00495	0.00484								0.02145	0.02211	0.0198	0.01639	0.0198
0.00462	0.00473	0.00495	0.00484								0.02156	0.02233	0.0198	0.01639	0.0198
0.00473	0.00473	0.00495	0.00484								0.02156	0.02233	0.01991	0.0165	0.01991
0.00473	0.00473	0.00495	0.00484								0.02167	0.02233	0.01991	0.0165	0.02002
0.00473	0.00473	0.00495	0.00495								0.02178	0.02277	0.01991	0.0165	0.02002
0.00473	0.00484	0.00495	0.00495								0.02178	0.02277	0.01991	0.0165	0.02013
0.00473	0.00484	0.00506	0.00495								0.02189	0.02277	0.01991	0.01672	0.02013
0.00473	0.00484	0.00506	0.00495								0.02189	0.02288	0.01991	0.01672	0.02013
0.00473	0.00484	0.00506	0.00495								0.022	0.02288	0.02002	0.01672	0.02035
0.00473	0.00484	0.00506	0.00495								0.022	0.02288	0.02002	0.01672	0.02035
0.00473	0.00484	0.00506	0.00495								0.022	0.02299	0.02002	0.01672	0.02035
0.00473	0.00484	0.00506	0.00495								0.022	0.02299	0.02002	0.01672	0.02035
0.00473	0.00484	0.00506	0.00495								0.02211	0.02299	0.02013	0.01672	0.02035
0.00473	0.00484	0.00506	0.00495								0.02211	0.02299	0.02024	0.01683	0.02057
0.00473	0.00484	0.00506	0.00495								0.02211	0.02299	0.02035	0.01683	0.02057
0.00484	0.00484	0.00506	0.00495								0.02222	0.02299	0.02035	0.01683	0.02057
0.00484	0.00484	0.00506	0.00495								0.02233	0.0231	0.02035	0.01694	0.02068
0.00484	0.00484	0.00506	0.00506								0.02233	0.0231	0.02046	0.01694	0.02068
0.00484	0.00484	0.00506	0.00506								0.02244	0.0231	0.02046	0.01694	0.02068
0.00484	0.00484	0.00517	0.00506								0.02244	0.02321	0.02046	0.01705	0.02068
0.00484	0.00484	0.00517	0.00506								0.02244	0.02321	0.02046	0.01705	0.02068
0.00484	0.00484	0.00517	0.00506								0.02244	0.02332	0.02057	0.01705	0.02079
0.00484	0.00495	0.00517	0.00506								0.02255	0.02332	0.02057	0.01705	0.02079
0.00484	0.00495	0.00517	0.00506								0.02255	0.02332	0.02068	0.01705	0.02079
0.00484	0.00495	0.00517	0.00506								0.02255	0.02332	0.02068	0.01716	0.0209
0.00484	0.00495	0.00517	0.00506								0.02266	0.02343	0.02068	0.01716	0.02101
0.00484	0.00495	0.00517	0.00506								0.02266	0.02343	0.02068	0.01716	0.02101
0.00484	0.00495	0.00517	0.00506								0.02266	0.02354	0.02079	0.01716	0.02101
0.00484	0.00495	0.00517	0.00506								0.02277	0.02354	0.02079	0.01716	0.02101
0.00484	0.00495	0.00517	0.00517								0.02277	0.02354	0.02079	0.01727	0.02101
0.00484	0.00495	0.00517	0.00517								0.02277	0.02365	0.0209	0.01727	0.02112
0.00484	0.00495	0.00517	0.00528								0.02277	0.02365	0.0209	0.01727	0.02112
0.00484	0.00495	0.00517	0.00528								0.02277	0.02365	0.02101	0.01727	0.02123
0.00484	0.00495	0.00517	0.00528								0.02288	0.02376	0.02101	0.01727	0.02123
0.00484	0.00495	0.00517	0.00528								0.02288	0.02387	0.02112	0.01738	0.02123
0.00484	0.00495	0.00528	0.00528								0.02288	0.02387	0.02112	0.01738	0.02134
0.00495	0.00495	0.00528	0.00528								0.02288	0.02387	0.02112	0.01738	0.02134
0.00495	0.00495	0.00528	0.00528								0.02299	0.02387	0.02112	0.01738	0.02134
0.00495	0.00495	0.00528	0.00528								0.02299	0.02398	0.02123	0.01738	0.02145
0.00495	0.00506	0.00528	0.00528								0.0231	0.02398	0.02123	0.01738	0.02145
0.00495	0.00506	0.00528	0.00528								0.0231	0.02398	0.02123	0.01749	0.02145
0.00495	0.00506	0.00528	0.00528								0.0231	0.02398	0.02123	0.01749	0.02145
0.00495	0.00506	0.00528	0.00528								0.0231	0.02409	0.02123	0.01749	0.02145
0.00495	0.00506	0.00528	0.00528								0.02321	0.02409	0.02134	0.0176	0.02145
0.00495	0.00506	0.00528	0.00528								0.02321	0.02409	0.02134	0.0176	0.02145
0.00495	0.00506	0.00528	0.00528								0.02321	0.0242	0.02134	0.0176	0.02145
0.00495	0.00506	0.00528	0.00539								0.02321	0.02431	0.02134	0.0176	0.02156
0.00495	0.00506	0.00528	0.00539								0.02321	0.02442	0.02145	0.0176	0.02156
0.00495	0.00506	0.00528	0.00539								0.02321	0.02442	0.02145	0.0176	0.02167
0.00495	0.00506	0.00528	0.00539								0.02332	0.02442	0.02145	0.01771	0.02167
0.00495	0.00506	0.00528	0.00539								0.02332	0.02453	0.02145	0.01771	0.02167
0.00506	0.00517	0.00528	0.00539								0.02332	0.02453	0.02145	0.01771	0.02167
0.00506	0.00517	0.00539	0.00539								0.02332	0.02453	0.02145	0.01782	0.02167
0.00506	0.00517	0.00539	0.00539								0.02332	0.02453	0.02156	0.01782	0.02167
0.00506	0.00517	0.00539	0.00539								0.02343	0.02464	0.02156	0.01782	0.02178
0.00506	0.00517	0.00539	0.00539								0.02343	0.02475	0.02156	0.01782	0.02178
0.00506	0.00517	0.00539	0.00539								0.02343	0.02475	0.02156	0.01793	0.02178
0.00506	0.00517	0.00539	0.00539								0.02343	0.02486	0.02167	0.01793	0.02178
0.00506	0.00517	0.00539	0.00539								0.02354	0.02486	0.02167	0.01804	0.02178
0.00506	0.00517	0.00539	0.00539								0.02354	0.02486	0.02167	0.01804	0.02189
0.00506	0.00517	0.00539	0.00539								0.02354	0.02497	0.02167	0.01804	0.022
0.00517	0.00517	0.00539	0.00539								0.02354	0.02497	0.02167	0.01804	0.022
0.00517	0.00517	0.00539	0.00539								0.02354	0.02497	0.02178	0.01804	0.022
0.00517	0.00517	0.00539	0.00539								0.02365	0.02508	0.02178	0.01815	0.022
0.00517	0.00517	0.00539	0.00539								0.02365	0.02508	0.02178	0.01815	0.02211
0.00517	0.00517	0.0055	0.00539								0.02365	0.02508	0.02178	0.01815	0.02211
0.00517	0.00517	0.0055	0.0055								0.02376	0.02508	0.02189	0.01815	0.02222
0.00517	0.00517	0.0055	0.0055								0.02387	0.02519	0.02189	0.01815	0.02244
0.00517	0.00517	0.0055	0.0055								0.02387	0.0253	0.02189	0.01815	0.02244
0.00517	0.00528	0.0055	0.0055								0.02398	0.0253	0.02189	0.01826	0.02244
0.00517	0.00528	0.0055	0.0055								0.02398	0.02552	0.022	0.01837	0.02255
0.00517	0.00528	0.0055	0.0055								0.02398	0.02552	0.022	0.01837	0.02255
0.00517	0.00528	0.0055	0.0055								0.02409	0.02563	0.022	0.01837	0.02255
0.00517	0.00528	0.0055	0.0055								0.02409	0.02574	0.02211	0.01837	0.02266
0.00517	0.00528	0.0055	0.0055								0.02409	0.02574	0.02211	0.01848	0.02277
0.00517	0.00528	0.0055	0.0055								0.02409	0.02574	0.02211	0.01848	0.02277
0.00517	0.00528	0.0055	0.0055								0.0242	0.02574	0.02211	0.01848	0.02288
0.00528	0.00528	0.0055	0.0055								0.0242	0.02574	0.02222	0.01848	0.02288
0.00528	0.00528	0.0055	0.0055								0.0242	0.02574	0.02222	0.01859	0.02288
0.00528	0.00528	0.0055	0.0055								0.0242	0.02574	0.02222	0.01859	0.02288
0.00528	0.00528	0.0055	0.0055								0.02431	0.02574	0.02222	0.01859	0.0231
0.00528	0.00528	0.0055	0.0055								0.02442	0.02585	0.02222	0.0187	0.0231
0.00528	0.00528	0.0055	0.0055								0.02442	0.02585	0.02233	0.0187	0.0231
0.00528	0.00528	0.0055	0.0055								0.02442	0.02596	0.02233	0.0187	0.0231
0.00528	0.00528	0.0055	0.0055								0.02442	0.02596	0.02233	0.0187	0.02321
0.00528	0.00528	0.0055	0.00561								0.02442	0.02607	0.02233	0.0187	0.02321
0.00528	0.00528	0.00561	0.00561								0.02453	0.02607	0.02233	0.0187	0.02332
0.00528	0.00528	0.00561	0.00561								0.02453	0.02607	0.02244	0.01881	0.02332
0.00528	0.00539	0.00561	0.00561								0.02453	0.02607	0.02244	0.01881	0.02343
0.00539	0.00539	0.00561	0.00561								0.02453	0.02607	0.02244	0.01881	0.02343
0.00539	0.00539	0.00561	0.00561								0.02464	0.02607	0.02244	0.01881	0.02343
0.00539	0.00539	0.00561	0.00561								0.02464	0.02618	0.02244	0.01881	0.02343
0.00539	0.00539	0.00561	0.00561								0.02464	0.02618	0.02244	0.01881	0.02354
0.00539	0.00539	0.00561	0.00561								0.02464	0.02629	0.02255	0.01881	0.02365
0.00539	0.00539	0.00561	0.00561								0.02464	0.0264	0.02255	0.01881	0.02365
0.00539	0.00539	0.00561	0.00572								0.02475	0.02651	0.02255	0.01892	0.02365
0.00539	0.00539	0.00561	0.00572								0.02475	0.02651	0.02255	0.01892	0.02376
0.00539	0.00539	0.00561	0.00572								0.02475	0.02662	0.02255	0.01892	0.02376
0.00539	0.00539	0.00561	0.00572								0.02475	0.02673	0.02266	0.01892	0.02376
0.00539	0.00539	0.00561	0.00572								0.02486	0.02673	0.02266	0.01892	0.02376
0.00539	0.00539	0.00572	0.00572								0.02486	0.02673	0.02266	0.01903	0.02387
0.00539	0.00539	0.00572	0.00572								0.02486	0.02673	0.02266	0.01903	0.02387
0.00539	0.00539	0.00572	0.00572								0.02508	0.02673	0.02277	0.01903	0.02387
0.00539	0.00539	0.00572	0.00572								0.02508	0.02684	0.02277	0.01903	0.02387
0.00539	0.0055	0.00572	0.00572								0.02508	0.02684	0.02277	0.01903	0.02409
0.00539	0.0055	0.00572	0.00572								0.02508	0.02684	0.02277	0.01903	0.02409
0.00539	0.0055	0.00572	0.00572								0.02508	0.02684	0.02277	0.01903	0.02409
0.00539	0.0055	0.00572	0.00572								0.02508	0.02695	0.02288	0.01914	0.02409
0.00539	0.0055	0.00572	0.00572								0.02519	0.02695	0.02288	0.01914	0.02409
0.00539	0.0055	0.00572	0.00572								0.0253	0.02695	0.02288	0.01914	0.0242
0.00539	0.0055	0.00572	0.00572								0.0253	0.02695	0.02299	0.01914	0.0242
0.00539	0.0055	0.00572	0.00583								0.0253	0.02695	0.02299	0.01914	0.0242
0.0055	0.00561	0.00572	0.00583								0.02541	0.02706	0.02299	0.01914	0.02431
0.0055	0.00561	0.00572	0.00583								0.02541	0.02706	0.02299	0.01914	0.02431
0.0055	0.00561	0.00572	0.00583								0.02541	0.02706	0.0231	0.01914	0.02431
0.0055	0.00561	0.00572	0.00583								0.02552	0.02706	0.0231	0.01925	0.02431
0.0055	0.00561	0.00583	0.00583								0.02552	0.02717	0.0231	0.01925	0.02431
0.0055	0.00561	0.00583	0.00583								0.02552	0.02717	0.02321	0.01925	0.02442
0.0055	0.00561	0.00583	0.00583								0.02552	0.02717	0.02321	0.01925	0.02442
0.0055	0.00561	0.00583	0.00583								0.02552	0.02728	0.02321	0.01925	0.02453
0.0055	0.00561	0.00583	0.00583								0.02563	0.02728	0.02332	0.01925	0.02453
0.0055	0.00561	0.00583	0.00583								0.02563	0.02739	0.02332	0.01925	0.02453
0.0055	0.00561	0.00583	0.00583								0.02574	0.02739	0.02332	0.01925	0.02453
0.0055	0.00561	0.00583	0.00583								0.02585	0.0275	0.02332	0.01936	0.02464
0.00561	0.00561	0.00583	0.00583								0.02585	0.0275	0.02332	0.01936	0.02464
0.00561	0.00561	0.00583	0.00594								0.02585	0.02761	0.02343	0.01936	0.02464
0.00561	0.00561	0.00583	0.00594								0.02585	0.02761	0.02343	0.01947	0.02464
0.00561	0.00572	0.00583	0.00594								0.02585	0.02761	0.02343	0.01947	0.02464
0.00561	0.00572	0.00583	0.00594								0.02596	0.02761	0.02343	0.01947	0.02475
0.00561	0.00572	0.00583	0.00594								0.02596	0.02772	0.02343	0.01947	0.02475
0.00561	0.00572	0.00583	0.00594								0.02607	0.02772	0.02343	0.01947	0.02475
0.00561	0.00572	0.00583	0.00594								0.02607	0.02772	0.02354	0.01958	0.02475
0.00561	0.00572	0.00594	0.00594								0.02607	0.02772	0.02354	0.01958	0.02475
0.00561	0.00572	0.00594	0.00594								0.02607	0.02772	0.02354	0.01958	0.02475
0.00561	0.00572	0.00594	0.00594								0.02618	0.02783	0.02354	0.01969	0.02475
0.00561	0.00572	0.00594	0.00594								0.02629	0.02794	0.02354	0.01969	0.02475
0.00561	0.00572	0.00594	0.00594								0.02629	0.02794	0.02354	0.01969	0.02486
0.00561	0.00572	0.00594	0.00594								0.0264	0.02794	0.02365	0.01969	0.02486
0.00561	0.00572	0.00594	0.00594								0.0264	0.02805	0.02365	0.0198	0.02486
0.00561	0.00572	0.00594	0.00594								0.0264	0.02805	0.02365	0.0198	0.02497
0.00561	0.00572	0.00594	0.00594								0.0264	0.02805	0.02365	0.0198	0.02497
0.00561	0.00572	0.00594	0.00594								0.02651	0.02816	0.02376	0.0198	0.02497
0.00561	0.00572	0.00594	0.00594								0.02651	0.02816	0.02376	0.01991	0.02508
0.00561	0.00572	0.00594	0.00605								0.02651	0.02816	0.02376	0.01991	0.02508
0.00561	0.00572	0.00594	0.00605								0.02651	0.02827	0.02387	0.01991	0.02519
0.00561	0.00583	0.00594	0.00605								0.02651	0.02827	0.02387	0.02002	0.0253
0.00561	0.00583	0.00594	0.00605								0.02662	0.02827	0.02387	0.02002	0.0253
0.00572	0.00583	0.00594	0.00605								0.02662	0.02838	0.02387	0.02013	0.02541
0.00572	0.00583	0.00605	0.00605								0.02662	0.02849	0.02387	0.02013	0.02541
0.00572	0.00583	0.00605	0.00605								0.02684	0.0286	0.02387	0.02013	0.02541
0.00572	0.00583	0.00605	0.00605								0.02684	0.0286	0.02398	0.02013	0.02541
0.00572	0.00583	0.00605	0.00605								0.02684	0.0286	0.02409	0.02024	0.02541
0.00572	0.00583	0.00605	0.00605								0.02695	0.0286	0.0242	0.02024	0.02541
0.00572	0.00583	0.00605	0.00605								0.02695	0.0286	0.0242	0.02024	0.02552
0.00572	0.00583	0.00605	0.00605								0.02695	0.02871	0.0242	0.02035	0.02563
0.00572	0.00583	0.00605	0.00605								0.02695	0.02871	0.0242	0.02035	0.02563
0.00572	0.00583	0.00605	0.00605								0.02706	0.02871	0.0242	0.02046	0.02563
0.00572	0.00583	0.00605	0.00605								0.02706	0.02893	0.02431	0.02046	0.02563
0.00572	0.00583	0.00605	0.00605								0.02706	0.02904	0.02431	0.02046	0.02574
0.00572	0.00583	0.00605	0.00605								0.02706	0.02904	0.02431	0.02057	0.02574
0.00572	0.00583	0.00605	0.00605								0.02706	0.02904	0.02431	0.02057	0.02574
0.00572	0.00583	0.00605	0.00605								0.02706	0.02915	0.02442	0.02057	0.02574
0.00572	0.00583	0.00605	0.00605								0.02706	0.02915	0.02442	0.02068	0.02574
0.00572	0.00583	0.00605	0.00605								0.02717	0.02915	0.02442	0.02068	0.02585
0.00572	0.00583	0.00605	0.00605								0.02717	0.02926	0.02442	0.02068	0.02596
0.00572	0.00583	0.00605	0.00605								0.02728	0.02926	0.02453	0.02079	0.02596
0.00583	0.00583	0.00616	0.00616								0.02728	0.02926	0.02464	0.02079	0.02596
0.00583	0.00583	0.00616	0.00616								0.02728	0.02926	0.02464	0.02079	0.02596
0.00583	0.00594	0.00616	0.00616								0.02728	0.02926	0.02464	0.02079	0.02596
0.00583	0.00594	0.00616	0.00616								0.02728	0.02926	0.02475	0.02079	0.02596
0.00583	0.00594	0.00616	0.00616								0.02739	0.02937	0.02475	0.02079	0.02607
0.00583	0.00594	0.00616	0.00616								0.0275	0.02937	0.02475	0.02079	0.02607
0.00583	0.00594	0.00616	0.00616								0.0275	0.02937	0.02475	0.02079	0.02607
0.00583	0.00594	0.00616	0.00616								0.02761	0.02948	0.02475	0.02079	0.02607
0.00583	0.00594	0.00616	0.00616								0.02761	0.02948	0.02475	0.0209	0.02618
0.00583	0.00594	0.00616	0.00616								0.02761	0.02948	0.02475	0.0209	0.02618
0.00583	0.00594	0.00616	0.00616								0.02761	0.02948	0.02486	0.0209	0.02618
0.00583	0.00594	0.00616	0.00616								0.02772	0.02959	0.02486	0.0209	0.02618
0.00583	0.00594	0.00616	0.00616								0.02783	0.0297	0.02486	0.0209	0.02629
0.00583	0.00594	0.00616	0.00616								0.02783	0.02981	0.02486	0.0209	0.02629
0.00583	0.00594	0.00616	0.00616								0.02783	0.02981	0.02497	0.0209	0.02629
0.00583	0.00594	0.00627	0.00627								0.02783	0.02981	0.02497	0.02101	0.02651
0.00583	0.00594	0.00627	0.00627								0.02783	0.02981	0.02497	0.02101	0.02651
0.00594	0.00594	0.00627	0.00627								0.02794	0.02992	0.02508	0.02101	0.02662
0.00594	0.00594	0.00627	0.00627								0.02794	0.02992	0.02508	0.02101	0.02662
0.00594	0.00605	0.00627	0.00627								0.02794	0.02992	0.02508	0.02101	0.02662
0.00594	0.00605	0.00627	0.00627								0.02794	0.02992	0.02508	0.02101	0.02662
0.00594	0.00605	0.00627	0.00627								0.02794	0.03003	0.02519	0.02101	0.02662
0.00594	0.00605	0.00627	0.00627								0.02805	0.03003	0.02519	0.02101	0.02673
0.00594	0.00605	0.00627	0.00627								0.02805	0.03003	0.02519	0.02101	0.02673
0.00594	0.00605	0.00627	0.00627								0.02805	0.03003	0.0253	0.02112	0.02673
0.00594	0.00605	0.00627	0.00627								0.02805	0.03003	0.0253	0.02112	0.02684
0.00594	0.00605	0.00627	0.00627								0.02805	0.03014	0.0253	0.02112	0.02684
0.00594	0.00605	0.00627	0.00627								0.02805	0.03014	0.02541	0.02112	0.02684
0.00594	0.00605	0.00627	0.00627								0.02816	0.03014	0.02541	0.02123	0.02684
0.00594	0.00605	0.00627	0.00627								0.02827	0.03014	0.02541	0.02123	0.02684
0.00594	0.00605	0.00627	0.00627								0.02827	0.03025	0.02541	0.02134	0.02695
0.00594	0.00605	0.00627	0.00627								0.02838	0.03025	0.02552	0.02134	0.02695
0.00594	0.00605	0.00627	0.00627								0.02838	0.03025	0.02563	0.02134	0.02695
0.00594	0.00605	0.00627	0.00627								0.02838	0.03025	0.02563	0.02134	0.02695
0.00594	0.00605	0.00627	0.00638								0.02838	0.03025	0.02563	0.02145	0.02695
0.00605	0.00605	0.00627	0.00638								0.02849	0.03036	0.02563	0.02145	0.02706
0.00605	0.00616	0.00638	0.00638								0.02849	0.03036	0.02574	0.02145	0.02706
0.00605	0.00616	0.00638	0.00638								0.02849	0.03036	0.02574	0.02156	0.02717
0.00605	0.00616	0.00638	0.00638								0.02849	0.03047	0.02574	0.02156	0.02717
0.00605	0.00616	0.00638	0.00638								0.0286	0.03047	0.02585	0.02156	0.02717
0.00605	0.00616	0.00638	0.00638								0.0286	0.03047	0.02585	0.02156	0.02717
0.00605	0.00616	0.00638	0.00638								0.0286	0.03058	0.02585	0.02167	0.02728
0.00605	0.00616	0.00638	0.00638								0.0286	0.03058	0.02585	0.02167	0.02739
0.00605	0.00616	0.00638	0.00638								0.0286	0.0308	0.02585	0.02167	0.02739
0.00605	0.00616	0.00638	0.00638								0.02871	0.03091	0.02585	0.02167	0.02739
0.00605	0.00616	0.00638	0.00638								0.02871	0.03102	0.02607	0.02167	0.0275
0.00605	0.00616	0.00638	0.00638								0.02871	0.03102	0.02607	0.02167	0.0275
0.00605	0.00616	0.00638	0.00638								0.02871	0.03102	0.02607	0.02178	0.0275
0.00605	0.00616	0.00638	0.00638								0.02871	0.03102	0.02618	0.02178	0.0275
0.00605	0.00616	0.00638	0.00649								0.02871	0.03113	0.02629	0.02178	0.0275
0.00605	0.00616	0.00638	0.00649								0.02882	0.03113	0.02629	0.02178	0.02761
0.00605	0.00627	0.00638	0.00649								0.02882	0.03113	0.02629	0.02178	0.02761
0.00605	0.00627	0.00638	0.00649								0.02882	0.03124	0.02629	0.02189	0.02761
0.00605	0.00627	0.00649	0.00649								0.02882	0.03124	0.02629	0.02189	0.02761
0.00605	0.00627	0.00649	0.00649								0.02882	0.03124	0.02629	0.02189	0.02761
0.00605	0.00627	0.00649	0.00649								0.02882	0.03124	0.02629	0.02189	0.02772
0.00616	0.00627	0.00649	0.00649								0.02893	0.03135	0.02629	0.022	0.02772
0.00616	0.00627	0.00649	0.00649								0.02893	0.03135	0.02629	0.022	0.02772
0.00616	0.00627	0.00649	0.00649								0.02893	0.03135	0.02629	0.022	0.02772
0.00616	0.00627	0.00649	0.00649								0.02893	0.03135	0.0264	0.02211	0.02772
0.00616	0.00627	0.00649	0.00649								0.02904	0.03146	0.0264	0.02211	0.02783
0.00616	0.00627	0.00649	0.00649								0.02904	0.03146	0.0264	0.02211	0.02783
0.00616	0.00627	0.00649	0.00649								0.02904	0.03146	0.0264	0.02222	0.02783
0.00616	0.00627	0.00649	0.00649								0.02904	0.03157	0.0264	0.02222	0.02783
0.00616	0.00627	0.00649	0.00649								0.02915	0.03168	0.0264	0.02222	0.02794
0.00616	0.00627	0.00649	0.00649								0.02926	0.03168	0.0264	0.02233	0.02794
0.00616	0.00627	0.00649	0.00649								0.02937	0.03168	0.02651	0.02233	0.02794
0.00616	0.00638	0.00649	0.0066								0.02937	0.03168	0.02651	0.02233	0.02794
0.00616	0.00638	0.0066	0.0066								0.02937	0.03168	0.02662	0.02244	0.02794
0.00616	0.00638	0.0066	0.0066								0.02937	0.03168	0.02662	0.02244	0.02794
0.00616	0.00638	0.0066	0.0066								0.02937	0.03179	0.02662	0.02244	0.02805
0.00616	0.00638	0.0066	0.0066								0.02948	0.03179	0.02662	0.02244	0.02805
0.00616	0.00638	0.0066	0.0066								0.02948	0.03179	0.02662	0.02244	0.02805
0.00616	0.00638	0.0066	0.0066								0.02959	0.03179	0.02662	0.02255	0.02805
0.00616	0.00638	0.0066	0.0066								0.02959	0.0319	0.02673	0.02255	0.02805
0.00616	0.00638	0.0066	0.0066								0.02959	0.0319	0.02673	0.02255	0.02816
0.00616	0.00638	0.0066	0.0066								0.02959	0.0319	0.02673	0.02255	0.02816
0.00616	0.00638	0.0066	0.0066								0.0297	0.0319	0.02684	0.02266	0.02816
0.00616	0.00638	0.0066	0.0066								0.0297	0.0319	0.02684	0.02266	0.02816
0.00616	0.00638	0.0066	0.0066								0.0297	0.03201	0.02684	0.02266	0.02816
0.00616	0.00638	0.0066	0.0066								0.0297	0.03201	0.02684	0.02266	0.02827
0.00616	0.00638	0.0066	0.00671								0.02981	0.03201	0.02684	0.02266	0.02827
0.00616	0.00638	0.00671	0.00671								0.02981	0.03201	0.02684	0.02266	0.02827
0.00616	0.00638	0.00671	0.00671								0.02981	0.03201	0.02684	0.02277	0.02827
0.00616	0.00649	0.00671	0.00671								0.02981	0.03212	0.02695	0.02277	0.02827
0.00627	0.00649	0.00671	0.00671								0.02981	0.03212	0.02706	0.02277	0.02838
0.00627	0.00649	0.00671	0.00671								0.02981	0.03212	0.02706	0.02288	0.02838
0.00627	0.00649	0.00671	0.00671								0.03003	0.03212	0.02706	0.02288	0.02838
0.00627	0.00649	0.00671	0.00671								0.03003	0.03212	0.02717	0.02288	0.02838
0.00627	0.00649	0.00671	0.00671								0.03003	0.03212	0.02717	0.02299	0.02838
0.00627	0.00649	0.00671	0.00671								0.03003	0.03212	0.02717	0.02299	0.02849
0.00627	0.00649	0.00671	0.00671								0.03003	0.03212	0.02728	0.02299	0.02849
0.00627	0.00649	0.00671	0.00671								0.03014	0.03223	0.02728	0.0231	0.02849
0.00627	0.00649	0.00671	0.00671								0.03014	0.03223	0.02728	0.0231	0.02849
0.00627	0.00649	0.00671	0.00671								0.03014	0.03223	0.02739	0.02321	0.02849
0.00627	0.00649	0.00671	0.00671								0.03014	0.03234	0.02739	0.02321	0.0286
0.00627	0.0066	0.00671	0.00671								0.03014	0.03234	0.02739	0.02321	0.0286
0.00627	0.0066	0.00671	0.00671								0.03014	0.03234	0.0275	0.02321	0.0286
0.00627	0.0066	0.00671	0.00671								0.03025	0.03234	0.0275	0.02332	0.0286
0.00627	0.0066	0.00671	0.00671								0.03025	0.03234	0.0275	0.02332	0.02871
0.00627	0.0066	0.00671	0.00671								0.03025	0.03245	0.0275	0.02332	0.02871
0.00627	0.0066	0.00671	0.00671								0.03025	0.03245	0.02761	0.02332	0.02871
0.00627	0.0066	0.00682	0.00671								0.03036	0.03245	0.02761	0.02332	0.02871
0.00627	0.0066	0.00682	0.00671								0.03036	0.03245	0.02761	0.02332	0.02882
0.00627	0.0066	0.00682	0.00671								0.03036	0.03245	0.02761	0.02332	0.02882
0.00627	0.0066	0.00682	0.00671								0.03047	0.03256	0.02761	0.02343	0.02882
0.00627	0.0066	0.00682	0.00671								0.03047	0.03256	0.02772	0.02343	0.02882
0.00627	0.0066	0.00682	0.00671								0.03047	0.03256	0.02772	0.02343	0.02893
0.00627	0.0066	0.00682	0.00682								0.03047	0.03267	0.02772	0.02343	0.02893
0.00627	0.0066	0.00682	0.00682								0.03047	0.03267	0.02772	0.02343	0.02893
0.00627	0.0066	0.00682	0.00682								0.03058	0.03278	0.02772	0.02354	0.02893
0.00627	0.0066	0.00682	0.00682								0.03058	0.03278	0.02783	0.02354	0.02893
0.00627	0.0066	0.00682	0.00682								0.03058	0.03278	0.02783	0.02365	0.02893
0.00638	0.0066	0.00682	0.00682								0.03058	0.03278	0.02783	0.02365	0.02904
0.00638	0.0066	0.00682	0.00682								0.03069	0.03278	0.02783	0.02365	0.02904
0.00638	0.0066	0.00693	0.00682								0.03069	0.03278	0.02783	0.02365	0.02904
0.00638	0.0066	0.00693	0.00682								0.03069	0.03278	0.02783	0.02365	0.02904
0.00638	0.0066	0.00693	0.00682								0.03069	0.03289	0.02783	0.02365	0.02904
0.00638	0.0066	0.00693	0.00682								0.03069	0.03289	0.02783	0.02376	0.02904
0.00638	0.00671	0.00693	0.00682								0.03069	0.03289	0.02794	0.02376	0.02915
0.00638	0.00671	0.00693	0.00682								0.03069	0.033	0.02794	0.02376	0.02915
0.00638	0.00671	0.00693	0.00682								0.0308	0.033	0.02805	0.02387	0.02915
0.00638	0.00671	0.00693	0.00682								0.0308	0.03311	0.02805	0.02387	0.02915
0.00638	0.00671	0.00693	0.00682								0.0308	0.03311	0.02805	0.02387	0.02915
0.00638	0.00671	0.00693	0.00693								0.0308	0.03311	0.02805	0.02387	0.02915
0.00638	0.00671	0.00693	0.00693								0.0308	0.03322	0.02805	0.02387	0.02926
0.00638	0.00671	0.00693	0.00693								0.03091	0.03322	0.02805	0.02387	0.02926
0.00638	0.00671	0.00693	0.00693								0.03091	0.03322	0.02805	0.02398	0.02926
0.00638	0.00671	0.00693	0.00693								0.03091	0.03333	0.02816	0.02409	0.02926
0.00638	0.00671	0.00693	0.00693								0.03102	0.03333	0.02816	0.02409	0.02926
0.00638	0.00671	0.00704	0.00693								0.03102	0.03333	0.02816	0.02409	0.02937
0.00638	0.00671	0.00704	0.00693								0.03102	0.03333	0.02816	0.02409	0.02937
0.00638	0.00671	0.00704	0.00693								0.03102	0.03344	0.02816	0.02409	0.02937
0.00638	0.00671	0.00704	0.00693								0.03102	0.03344	0.02816	0.0242	0.02937
0.00638	0.00671	0.00704	0.00693								0.03102	0.03344	0.02827	0.0242	0.02937
0.00638	0.00671	0.00704	0.00693								0.03113	0.03355	0.02827	0.0242	0.02937
0.00638	0.00671	0.00704	0.00693								0.03113	0.03355	0.02827	0.02431	0.02948
0.00638	0.00671	0.00704	0.00693								0.03113	0.03377	0.02827	0.02431	0.02948
0.00638	0.00671	0.00704	0.00693								0.03113	0.03377	0.02838	0.02442	0.02948
0.00638	0.00682	0.00704	0.00704								0.03113	0.03377	0.02838	0.02442	0.02948
0.00638	0.00682	0.00704	0.00704								0.03124	0.03377	0.02838	0.02442	0.02948
0.00638	0.00682	0.00704	0.00704								0.03124	0.03388	0.02849	0.02442	0.02948
0.00638	0.00682	0.00704	0.00704								0.03124	0.03388	0.02849	0.02442	0.02959
0.00649	0.00682	0.00704	0.00704								0.03135	0.03399	0.02849	0.02442	0.02959
0.00649	0.00682	0.00704	0.00704								0.03135	0.03399	0.02849	0.02453	0.02959
0.00649	0.00682	0.00704	0.00704								0.03135	0.03399	0.0286	0.02453	0.02959
0.00649	0.00682	0.00704	0.00704								0.03135	0.03399	0.0286	0.02453	0.02959
0.00649	0.00682	0.00704	0.00704								0.03146	0.03399	0.0286	0.02453	0.02959
0.00649	0.00682	0.00704	0.00704								0.03146	0.0341	0.0286	0.02453	0.02959
0.00649	0.00682	0.00704	0.00704								0.03146	0.0341	0.0286	0.02453	0.02959
0.00649	0.00682	0.00704	0.00704								0.03146	0.0341	0.0286	0.02453	0.02959
0.00649	0.00682	0.00715	0.00704								0.03146	0.0341	0.0286	0.02453	0.0297
0.00649	0.00682	0.00715	0.00704								0.03157	0.03421	0.0286	0.02453	0.02981
0.00649	0.00682	0.00715	0.00715								0.03157	0.03421	0.02871	0.02464	0.02981
0.00649	0.00693	0.00715	0.00715								0.03157	0.03432	0.02871	0.02464	0.02992
0.00649	0.00693	0.00715	0.00715								0.03157	0.03432	0.02871	0.02464	0.02992
0.00649	0.00693	0.00715	0.00715								0.03157	0.03432	0.02882	0.02464	0.02992
0.00649	0.00693	0.00715	0.00715								0.03157	0.03432	0.02882	0.02475	0.02992
0.0066	0.00693	0.00715	0.00715								0.03168	0.03432	0.02882	0.02475	0.02992
0.0066	0.00693	0.00715	0.00715								0.03168	0.03432	0.02882	0.02475	0.02992
0.0066	0.00693	0.00715	0.00715								0.03168	0.03432	0.02893	0.02475	0.03003
0.0066	0.00693	0.00715	0.00715								0.03179	0.03443	0.02893	0.02475	0.03003
0.0066	0.00693	0.00715	0.00715								0.03179	0.03443	0.02893	0.02475	0.03003
0.0066	0.00693	0.00715	0.00715								0.03179	0.03443	0.02893	0.02475	0.03014
0.0066	0.00693	0.00715	0.00715								0.03179	0.03443	0.02893	0.02486	0.03014
0.0066	0.00693	0.00715	0.00715								0.03179	0.03454	0.02904	0.02486	0.03014
0.0066	0.00693	0.00715	0.00715								0.0319	0.03454	0.02904	0.02497	0.03014
0.0066	0.00693	0.00715	0.00715								0.03201	0.03454	0.02904	0.02497	0.03025
0.0066	0.00693	0.00715	0.00715								0.03201	0.03454	0.02904	0.02497	0.03025
0.0066	0.00693	0.00715	0.00715								0.03201	0.03454	0.02904	0.02497	0.03036
0.0066	0.00693	0.00715	0.00715								0.03212	0.03465	0.02904	0.02497	0.03036
0.0066	0.00704	0.00715	0.00715								0.03212	0.03465	0.02915	0.02497	0.03036
0.0066	0.00704	0.00726	0.00726								0.03212	0.03465	0.02915	0.02508	0.03036
0.0066	0.00704	0.00726	0.00726								0.03212	0.03476	0.02915	0.02508	0.03036
0.0066	0.00704	0.00726	0.00726								0.03212	0.03476	0.02915	0.02519	0.03047
0.0066	0.00704	0.00726	0.00726								0.03223	0.03476	0.02915	0.02519	0.03047
0.0066	0.00704	0.00726	0.00726								0.03223	0.03476	0.02915	0.02519	0.03047
0.0066	0.00704	0.00726	0.00726								0.03234	0.03476	0.02926	0.02519	0.03047
0.0066	0.00704	0.00726	0.00726								0.03245	0.03487	0.02926	0.02519	0.03047
0.0066	0.00704	0.00726	0.00726								0.03245	0.03487	0.02926	0.02519	0.03047
0.0066	0.00704	0.00726	0.00726								0.03245	0.03487	0.02926	0.0253	0.03058
0.0066	0.00704	0.00726	0.00726								0.03245	0.03487	0.02937	0.0253	0.03058
0.0066	0.00704	0.00726	0.00726								0.03245	0.03487	0.02937	0.0253	0.03058
0.0066	0.00704	0.00726	0.00726								0.03245	0.03487	0.02937	0.0253	0.03058
0.0066	0.00704	0.00726	0.00726								0.03256	0.03487	0.02937	0.0253	0.03069
0.00671	0.00704	0.00726	0.00726								0.03256	0.03487	0.02948	0.0253	0.03069
0.00671	0.00704	0.00726	0.00737								0.03256	0.03487	0.02948	0.0253	0.03069
0.00671	0.00704	0.00726	0.00737								0.03256	0.03498	0.02948	0.02541	0.0308
0.00671	0.00715	0.00737	0.00737								0.03267	0.03498	0.02948	0.02541	0.0308
0.00671	0.00715	0.00737	0.00737								0.03267	0.03498	0.02948	0.02541	0.0308
0.00671	0.00715	0.00737	0.00737								0.03267	0.03509	0.02959	0.02541	0.0308
0.00671	0.00715	0.00737	0.00737								0.03267	0.03509	0.02959	0.02541	0.0308
0.00671	0.00715	0.00737	0.00737								0.03267	0.03509	0.02959	0.02552	0.0308
0.00671	0.00715	0.00737	0.00737								0.03267	0.03509	0.02959	0.02552	0.0308
0.00671	0.00715	0.00737	0.00737								0.03267	0.03509	0.0297	0.02552	0.03091
0.00671	0.00715	0.00737	0.00737								0.03267	0.03509	0.0297	0.02563	0.03091
0.00671	0.00715	0.00737	0.00737								0.03267	0.03509	0.0297	0.02574	0.03091
0.00671	0.00715	0.00737	0.00737								0.03278	0.0352	0.0297	0.02574	0.03091
0.00671	0.00715	0.00737	0.00737								0.03278	0.0352	0.0297	0.02574	0.03102
0.00671	0.00715	0.00737	0.00737								0.03289	0.0352	0.02981	0.02574	0.03102
0.00671	0.00715	0.00737	0.00737								0.03289	0.0352	0.02981	0.02585	0.03102
0.00671	0.00715	0.00737	0.00737								0.03289	0.0352	0.02981	0.02585	0.03102
0.00671	0.00715	0.00737	0.00737								0.033	0.03531	0.02981	0.02585	0.03102
0.00671	0.00715	0.00748	0.00737								0.033	0.03531	0.02981	0.02585	0.03113
0.00671	0.00715	0.00748	0.00737								0.033	0.03531	0.02981	0.02585	0.03113
0.00671	0.00715	0.00748	0.00737								0.033	0.03531	0.02981	0.02585	0.03113
0.00682	0.00715	0.00748	0.00748								0.033	0.03531	0.02992	0.02585	0.03124
0.00682	0.00715	0.00748	0.00748								0.033	0.03531	0.02992	0.02596	0.03124
0.00682	0.00715	0.00748	0.00748								0.03311	0.03542	0.02992	0.02596	0.03124
0.00682	0.00726	0.00748	0.00748								0.03311	0.03542	0.02992	0.02596	0.03135
0.00682	0.00726	0.00748	0.00748								0.03311	0.03542	0.02992	0.02596	0.03135
0.00682	0.00726	0.00748	0.00748								0.03322	0.03542	0.02992	0.02596	0.03135
0.00682	0.00726	0.00748	0.00748								0.03322	0.03542	0.03003	0.02596	0.03146
0.00682	0.00726	0.00748	0.00748								0.03322	0.03553	0.03003	0.02607	0.03146
0.00682	0.00726	0.00748	0.00748								0.03322	0.03553	0.03003	0.02607	0.03146
0.00682	0.00726	0.00748	0.00748								0.03322	0.03564	0.03003	0.02607	0.03157
0.00682	0.00726	0.00748	0.00748								0.03333	0.03564	0.03003	0.02607	0.03157
0.00682	0.00726	0.00748	0.00748								0.03344	0.03564	0.03003	0.02618	0.03157
0.00682	0.00726	0.00748	0.00748								0.03344	0.03564	0.03003	0.02629	0.03157
0.00682	0.00726	0.00748	0.00748								0.03344	0.03564	0.03014	0.02629	0.03157
0.00682	0.00726	0.00748	0.00748								0.03344	0.03564	0.03014	0.02629	0.03157
0.00682	0.00726	0.00748	0.00748								0.03355	0.03564	0.03014	0.02629	0.03157
0.00682	0.00726	0.00748	0.00748								0.03366	0.03564	0.03014	0.0264	0.03168
0.00682	0.00726	0.00748	0.00748								0.03366	0.03564	0.03014	0.0264	0.03168
0.00682	0.00726	0.00748	0.00748								0.03366	0.03564	0.03025	0.0264	0.03179
0.00682	0.00726	0.00748	0.00748								0.03366	0.03564	0.03025	0.02651	0.03179
0.00682	0.00726	0.00748	0.00748								0.03366	0.03575	0.03025	0.02651	0.03179
0.00693	0.00726	0.00748	0.00759								0.03377	0.03575	0.03025	0.02651	0.03179
0.00693	0.00726	0.00759	0.00759								0.03377	0.03575	0.03036	0.02651	0.03179
0.00693	0.00726	0.00759	0.00759								0.03377	0.03575	0.03036	0.02651	0.0319
0.00693	0.00726	0.00759	0.00759								0.03377	0.03575	0.03036	0.02651	0.0319
0.00693	0.00726	0.00759	0.00759								0.03377	0.03575	0.03047	0.02662	0.0319
0.00693	0.00737	0.00759	0.00759								0.03377	0.03586	0.03047	0.02662	0.0319
0.00693	0.00737	0.00759	0.00759								0.03377	0.03586	0.03047	0.02662	0.03201
0.00693	0.00737	0.00759	0.00759								0.03377	0.03597	0.03047	0.02662	0.03201
0.00693	0.00737	0.00759	0.00759								0.03388	0.03597	0.03047	0.02673	0.03201
0.00693	0.00737	0.00759	0.00759								0.03388	0.03597	0.03047	0.02673	0.03201
0.00693	0.00737	0.00759	0.00759								0.03388	0.03608	0.03047	0.02673	0.03201
0.00693	0.00737	0.00759	0.00759								0.03388	0.03608	0.03058	0.02673	0.03201
0.00693	0.00737	0.00759	0.00759								0.03388	0.03608	0.03058	0.02684	0.03201
0.00693	0.00737	0.00759	0.00759								0.03388	0.03619	0.03058	0.02684	0.03212
0.00693	0.00737	0.00759	0.00759								0.03388	0.03619	0.03058	0.02684	0.03212
0.00693	0.00737	0.00759	0.00759								0.03388	0.03619	0.03058	0.02684	0.03212
0.00693	0.00737	0.00759	0.00759								0.03399	0.03619	0.03069	0.02684	0.03212
0.00693	0.00737	0.00759	0.00759								0.03399	0.03619	0.03069	0.02684	0.03223
0.00693	0.00737	0.00759	0.00759								0.0341	0.03619	0.03069	0.02684	0.03223
0.00704	0.00737	0.00759	0.0077								0.0341	0.03619	0.0308	0.02695	0.03234
0.00704	0.00737	0.00759	0.0077								0.0341	0.03619	0.0308	0.02695	0.03234
0.00704	0.00737	0.0077	0.0077								0.0341	0.0363	0.0308	0.02695	0.03234
0.00704	0.00737	0.0077	0.0077								0.0341	0.0363	0.0308	0.02695	0.03245
0.00704	0.00737	0.0077	0.0077								0.03421	0.0363	0.0308	0.02695	0.03245
0.00704	0.00737	0.0077	0.0077								0.03421	0.03652	0.0308	0.02695	0.03245
0.00704	0.00737	0.0077	0.0077								0.03421	0.03663	0.0308	0.02695	0.03245
0.00704	0.00737	0.0077	0.0077								0.03421	0.03663	0.03091	0.02706	0.03245
0.00704	0.00737	0.0077	0.0077								0.03421	0.03663	0.03091	0.02706	0.03245
0.00704	0.00737	0.0077	0.0077								0.03432	0.03663	0.03091	0.02706	0.03245
0.00704	0.00748	0.0077	0.0077								0.03432	0.03663	0.03091	0.02706	0.03256
0.00704	0.00748	0.0077	0.0077								0.03443	0.03663	0.03091	0.02706	0.03256
0.00704	0.00748	0.0077	0.0077								0.03443	0.03674	0.03091	0.02706	0.03256
0.00704	0.00748	0.0077	0.0077								0.03443	0.03674	0.03102	0.02706	0.03256
0.00715	0.00748	0.0077	0.0077								0.03443	0.03685	0.03102	0.02717	0.03256
0.00715	0.00748	0.0077	0.00781								0.03443	0.03685	0.03102	0.02717	0.03256
0.00715	0.00748	0.0077	0.00781								0.03443	0.03685	0.03113	0.02717	0.03256
0.00715	0.00748	0.00781	0.00781								0.03454	0.03685	0.03113	0.02717	0.03267
0.00715	0.00748	0.00781	0.00781								0.03454	0.03696	0.03113	0.02717	0.03267
0.00715	0.00748	0.00781	0.00781								0.03454	0.03696	0.03113	0.02717	0.03267
0.00715	0.00748	0.00781	0.00781								0.03454	0.03696	0.03113	0.02728	0.03267
0.00715	0.00748	0.00781	0.00781								0.03465	0.03696	0.03113	0.02728	0.03278
0.00715	0.00748	0.00781	0.00781								0.03465	0.03696	0.03124	0.02728	0.03278
0.00715	0.00748	0.00781	0.00781								0.03465	0.03696	0.03124	0.02728	0.03278
0.00715	0.00748	0.00781	0.00781								0.03465	0.03696	0.03124	0.02728	0.03289
0.00715	0.00748	0.00781	0.00781								0.03465	0.03696	0.03124	0.02728	0.03289
0.00715	0.00748	0.00781	0.00781								0.03476	0.03707	0.03124	0.02739	0.03289
0.00715	0.00748	0.00781	0.00781								0.03487	0.03707	0.03124	0.02739	0.033
0.00715	0.00748	0.00781	0.00781								0.03487	0.03707	0.03135	0.02739	0.033
0.00715	0.00748	0.00781	0.00781								0.03487	0.03707	0.03135	0.02739	0.033
0.00715	0.00748	0.00781	0.00781								0.03487	0.03718	0.03135	0.02739	0.033
0.00715	0.00748	0.00781	0.00781								0.03487	0.03718	0.03135	0.02739	0.033
0.00715	0.00748	0.00781	0.00781								0.03487	0.03718	0.03146	0.02739	0.033
0.00715	0.00748	0.00781	0.00781								0.03487	0.03718	0.03146	0.02739	0.033
0.00726	0.00759	0.00781	0.00781								0.03487	0.03729	0.03146	0.0275	0.03311
0.00726	0.00759	0.00781	0.00781								0.03487	0.03729	0.03157	0.0275	0.03311
0.00726	0.00759	0.00781	0.00781								0.03498	0.03729	0.03157	0.0275	0.03311
0.00726	0.00759	0.00781	0.00781								0.03498	0.03729	0.03157	0.02761	0.03311
0.00726	0.00759	0.00781	0.00781								0.03509	0.0374	0.03157	0.02761	0.03311
0.00726	0.00759	0.00792	0.00781								0.03509	0.0374	0.03157	0.02761	0.03311
0.00726	0.00759	0.00792	0.00792								0.03509	0.0374	0.03168	0.02761	0.03322
0.00726	0.00759	0.00792	0.00792								0.03509	0.03751	0.03168	0.02761	0.03322
0.00726	0.00759	0.00792	0.00792								0.03509	0.03751	0.03168	0.02761	0.03322
0.00726	0.00759	0.00792	0.00792								0.03509	0.03751	0.03168	0.02761	0.03322
0.00726	0.00759	0.00792	0.00792								0.0352	0.03762	0.03179	0.02761	0.03333
0.00726	0.00759	0.00792	0.00792								0.0352	0.03773	0.03179	0.02761	0.03333
0.00726	0.00759	0.00792	0.00792								0.0352	0.03773	0.03179	0.02772	0.03333
0.00726	0.00759	0.00792	0.00792								0.03531	0.03773	0.03179	0.02772	0.03344
0.00726	0.00759	0.00792	0.00792								0.03531	0.03773	0.03179	0.02772	0.03344
0.00726	0.00759	0.00792	0.00792								0.03531	0.03773	0.03179	0.02772	0.03355
0.00726	0.00759	0.00792	0.00792								0.03531	0.03773	0.03179	0.02772	0.03355
0.00726	0.00759	0.00792	0.00792								0.03542	0.03773	0.0319	0.02772	0.03355
0.00726	0.00759	0.00792	0.00792								0.03542	0.03773	0.0319	0.02772	0.03355
0.00726	0.00759	0.00803	0.00792								0.03542	0.03784	0.0319	0.02772	0.03355
0.00726	0.00759	0.00803	0.00792								0.03542	0.03784	0.0319	0.02783	0.03355
0.00726	0.00759	0.00803	0.00792								0.03542	0.03784	0.0319	0.02783	0.03366
0.00726	0.0077	0.00803	0.00792								0.03542	0.03784	0.03201	0.02783	0.03366
0.00726	0.0077	0.00803	0.00792								0.03542	0.03784	0.03201	0.02783	0.03377
0.00737	0.0077	0.00803	0.00792								0.03553	0.03795	0.03201	0.02783	0.03377
0.00737	0.0077	0.00803	0.00792								0.03553	0.03795	0.03201	0.02783	0.03377
0.00737	0.0077	0.00803	0.00792								0.03553	0.03795	0.03201	0.02783	0.03388
0.00737	0.0077	0.00803	0.00792								0.03553	0.03795	0.03201	0.02783	0.03388
0.00737	0.0077	0.00803	0.00803								0.03564	0.03806	0.03201	0.02783	0.03388
0.00737	0.0077	0.00803	0.00803								0.03564	0.03806	0.03201	0.02794	0.03388
0.00737	0.0077	0.00803	0.00803								0.03564	0.03817	0.03212	0.02794	0.03399
0.00737	0.0077	0.00803	0.00803								0.03575	0.03817	0.03212	0.02794	0.03399
0.00737	0.0077	0.00803	0.00803								0.03575	0.03817	0.03212	0.02805	0.03399
0.00737	0.0077	0.00803	0.00803								0.03575	0.03817	0.03223	0.02805	0.03399
0.00737	0.0077	0.00803	0.00803								0.03575	0.03828	0.03223	0.02805	0.0341
0.00737	0.0077	0.00803	0.00803								0.03575	0.03839	0.03223	0.02805	0.0341
0.00737	0.0077	0.00803	0.00803								0.03586	0.03839	0.03223	0.02805	0.0341
0.00737	0.0077	0.00803	0.00803								0.03586	0.03839	0.03223	0.02805	0.0341
0.00737	0.0077	0.00803	0.00803								0.03586	0.03839	0.03234	0.02805	0.0341
0.00737	0.0077	0.00814	0.00803								0.03586	0.0385	0.03234	0.02805	0.0341
0.00737	0.0077	0.00814	0.00803								0.03597	0.0385	0.03234	0.02816	0.03421
0.00737	0.0077	0.00814	0.00803								0.03597	0.0385	0.03234	0.02816	0.03421
0.00737	0.0077	0.00814	0.00803								0.03597	0.0385	0.03234	0.02816	0.03421
0.00737	0.0077	0.00814	0.00803								0.03597	0.0385	0.03234	0.02816	0.03421
0.00737	0.0077	0.00814	0.00803								0.03597	0.03861	0.03234	0.02816	0.03421
0.00748	0.00781	0.00814	0.00803								0.03608	0.03861	0.03245	0.02827	0.03421
0.00748	0.00781	0.00814	0.00803								0.03608	0.03861	0.03245	0.02827	0.03421
0.00748	0.00781	0.00814	0.00803								0.03619	0.03861	0.03245	0.02827	0.03432
0.00748	0.00781	0.00814	0.00803								0.03619	0.03861	0.03245	0.02827	0.03432
0.00748	0.00781	0.00814	0.00814								0.03619	0.03861	0.03256	0.02827	0.03432
0.00748	0.00781	0.00814	0.00814								0.0363	0.03861	0.03256	0.02838	0.03432
0.00748	0.00781	0.00814	0.00814								0.0363	0.03861	0.03256	0.02838	0.03432
0.00748	0.00781	0.00814	0.00814								0.0363	0.03861	0.03256	0.02838	0.03432
0.00748	0.00781	0.00814	0.00814								0.0363	0.03861	0.03256	0.02838	0.03443
0.00748	0.00781	0.00814	0.00814								0.0363	0.03872	0.03256	0.02838	0.03454
0.00748	0.00781	0.00814	0.00814								0.0363	0.03872	0.03256	0.02838	0.03454
0.00748	0.00781	0.00814	0.00814								0.03641	0.03872	0.03267	0.02838	0.03454
0.00748	0.00781	0.00814	0.00814								0.03641	0.03883	0.03267	0.02838	0.03454
0.00748	0.00781	0.00814	0.00814								0.03652	0.03883	0.03267	0.02849	0.03454
0.00748	0.00781	0.00814	0.00814								0.03652	0.03883	0.03267	0.02849	0.03465
0.00748	0.00781	0.00825	0.00814								0.03652	0.03883	0.03267	0.0286	0.03465
0.00748	0.00781	0.00825	0.00814								0.03652	0.03883	0.03267	0.0286	0.03476
0.00748	0.00781	0.00825	0.00814								0.03663	0.03894	0.03267	0.0286	0.03487
0.00748	0.00781	0.00825	0.00814								0.03663	0.03905	0.03267	0.0286	0.03487
0.00748	0.00781	0.00825	0.00814								0.03674	0.03905	0.03278	0.0286	0.03487
0.00748	0.00781	0.00825	0.00825								0.03674	0.03905	0.03278	0.0286	0.03487
0.00748	0.00781	0.00825	0.00825								0.03674	0.03905	0.03278	0.0286	0.03487
0.00748	0.00781	0.00825	0.00825								0.03685	0.03905	0.03289	0.0286	0.03487
0.00748	0.00781	0.00825	0.00825								0.03685	0.03916	0.03289	0.0286	0.03487
0.00759	0.00781	0.00825	0.00825								0.03685	0.03916	0.03289	0.0286	0.03487
0.00759	0.00781	0.00825	0.00825								0.03685	0.03916	0.03289	0.0286	0.03498
0.00759	0.00781	0.00825	0.00825								0.03696	0.03927	0.03289	0.02871	0.03498
0.00759	0.00781	0.00825	0.00825								0.03707	0.03927	0.033	0.02871	0.03498
0.00759	0.00792	0.00825	0.00825								0.03707	0.03927	0.033	0.02871	0.03498
0.00759	0.00792	0.00825	0.00825								0.03707	0.03927	0.033	0.02871	0.03509
0.00759	0.00792	0.00825	0.00825								0.03707	0.03938	0.033	0.02871	0.03509
0.00759	0.00792	0.00825	0.00825								0.03707	0.03938	0.033	0.02871	0.03509
0.00759	0.00792	0.00825	0.00825								0.03707	0.03949	0.03311	0.02871	0.03509
0.00759	0.00792	0.00825	0.00825								0.03718	0.03949	0.03311	0.02871	0.0352
0.00759	0.00792	0.00825	0.00825								0.03718	0.0396	0.03311	0.02871	0.0352
0.00759	0.00792	0.00825	0.00825								0.03718	0.0396	0.03311	0.02882	0.0352
0.00759	0.00792	0.00825	0.00825								0.03718	0.0396	0.03311	0.02882	0.0352
0.00759	0.00792	0.00825	0.00825								0.03729	0.03971	0.03311	0.02882	0.03531
0.00759	0.00792	0.00825	0.00825								0.03729	0.03971	0.03322	0.02882	0.03531
0.00759	0.00792	0.00825	0.00825								0.03729	0.03971	0.03322	0.02882	0.03542
0.00759	0.00792	0.00825	0.00825								0.0374	0.03982	0.03322	0.02893	0.03542
0.00759	0.00792	0.00825	0.00825								0.0374	0.03982	0.03322	0.02893	0.03542
0.00759	0.00792	0.00825	0.00825								0.0374	0.03982	0.03322	0.02893	0.03542
0.00759	0.00792	0.00825	0.00836								0.0374	0.03982	0.03322	0.02893	0.03542
0.00759	0.00792	0.00825	0.00836								0.0374	0.03993	0.03322	0.02904	0.03553
0.00759	0.00803	0.00836	0.00836								0.03751	0.03993	0.03322	0.02904	0.03553
0.0077	0.00803	0.00836	0.00836								0.03751	0.03993	0.03322	0.02904	0.03553
0.0077	0.00803	0.00836	0.00836								0.03751	0.03993	0.03322	0.02904	0.03553
0.0077	0.00803	0.00836	0.00836								0.03751	0.03993	0.03322	0.02904	0.03564
0.0077	0.00803	0.00836	0.00836								0.03751	0.03993	0.03322	0.02904	0.03564
0.0077	0.00803	0.00836	0.00836								0.03762	0.03993	0.03333	0.02904	0.03564
0.0077	0.00803	0.00836	0.00836								0.03762	0.03993	0.03344	0.02904	0.03564
0.0077	0.00803	0.00836	0.00836								0.03762	0.03993	0.03344	0.02904	0.03564
0.0077	0.00803	0.00836	0.00836								0.03762	0.03993	0.03344	0.02915	0.03564
0.0077	0.00803	0.00836	0.00836								0.03762	0.03993	0.03355	0.02915	0.03564
0.0077	0.00803	0.00836	0.00836								0.03762	0.04004	0.03355	0.02915	0.03575
0.0077	0.00803	0.00836	0.00836								0.03773	0.04004	0.03355	0.02915	0.03575
0.0077	0.00803	0.00836	0.00836								0.03773	0.04004	0.03366	0.02915	0.03575
0.0077	0.00803	0.00836	0.00836								0.03773	0.04004	0.03366	0.02915	0.03586
0.0077	0.00803	0.00836	0.00836								0.03773	0.04004	0.03366	0.02915	0.03586
0.0077	0.00803	0.00836	0.00836								0.03773	0.04004	0.03366	0.02926	0.03586
0.0077	0.00803	0.00836	0.00836								0.03784	0.04015	0.03377	0.02926	0.03586
0.0077	0.00803	0.00836	0.00836								0.03784	0.04015	0.03377	0.02926	0.03586
0.0077	0.00803	0.00836	0.00836								0.03784	0.04015	0.03377	0.02937	0.03597
0.0077	0.00803	0.00836	0.00836								0.03795	0.04015	0.03377	0.02937	0.03597
0.0077	0.00803	0.00836	0.00847								0.03795	0.04015	0.03388	0.02937	0.03597
0.0077	0.00803	0.00836	0.00847								0.03795	0.04015	0.03388	0.02937	0.03597
0.0077	0.00803	0.00847	0.00847								0.03795	0.04026	0.03388	0.02937	0.03597
0.0077	0.00803	0.00847	0.00847								0.03806	0.04037	0.03388	0.02937	0.03597
0.0077	0.00803	0.00847	0.00847								0.03806	0.04037	0.03388	0.02948	0.03597
0.0077	0.00803	0.00847	0.00847								0.03806	0.04037	0.03388	0.02948	0.03608
0.0077	0.00814	0.00847	0.00847								0.03817	0.04037	0.03399	0.02948	0.03608
0.0077	0.00814	0.00847	0.00847								0.03817	0.04037	0.03399	0.02948	0.03608
0.0077	0.00814	0.00847	0.00847								0.03817	0.04048	0.03399	0.02948	0.03608
0.0077	0.00814	0.00847	0.00847								0.03817	0.04048	0.03399	0.02948	0.03608
0.0077	0.00814	0.00847	0.00847								0.03817	0.04048	0.03399	0.02948	0.03619
0.0077	0.00814	0.00847	0.00847								0.03817	0.04048	0.03399	0.02959	0.03619
0.0077	0.00814	0.00847	0.00847								0.03817	0.04048	0.03399	0.02959	0.03619
0.0077	0.00814	0.00847	0.00847								0.03817	0.04048	0.03399	0.02959	0.03619
0.0077	0.00814	0.00847	0.00847								0.03817	0.04059	0.0341	0.02959	0.03619
0.0077	0.00814	0.00847	0.00847								0.03817	0.04059	0.0341	0.0297	0.0363
0.0077	0.00814	0.00847	0.00847								0.03817	0.04059	0.0341	0.0297	0.0363
0.00781	0.00814	0.00847	0.00847								0.03828	0.0407	0.0341	0.0297	0.0363
0.00781	0.00814	0.00847	0.00847								0.03828	0.0407	0.0341	0.0297	0.03641
0.00781	0.00814	0.00847	0.00847								0.03828	0.0407	0.0341	0.0297	0.03641
0.00781	0.00814	0.00847	0.00847								0.03839	0.0407	0.0341	0.0297	0.03641
0.00781	0.00814	0.00847	0.00847								0.03839	0.0407	0.0341	0.02981	0.03641
0.00781	0.00814	0.00847	0.00858								0.03839	0.0407	0.0341	0.02981	0.03641
0.00781	0.00814	0.00847	0.00858								0.03839	0.0407	0.03421	0.02981	0.03641
0.00781	0.00814	0.00858	0.00858								0.03839	0.04081	0.03421	0.02981	0.03641
0.00781	0.00825	0.00858	0.00858								0.03839	0.04081	0.03421	0.02981	0.03641
0.00781	0.00825	0.00858	0.00858								0.03839	0.04081	0.03421	0.02981	0.03641
0.00781	0.00825	0.00858	0.00858								0.0385	0.04092	0.03432	0.02981	0.03652
0.00781	0.00825	0.00858	0.00858								0.0385	0.04092	0.03432	0.02992	0.03652
0.00781	0.00825	0.00858	0.00858								0.0385	0.04092	0.03432	0.02992	0.03652
0.00781	0.00825	0.00858	0.00858								0.0385	0.04092	0.03432	0.02992	0.03652
0.00781	0.00825	0.00858	0.00858								0.0385	0.04092	0.03432	0.02992	0.03652
0.00781	0.00825	0.00858	0.00858								0.0385	0.04092	0.03432	0.02992	0.03652
0.00781	0.00825	0.00858	0.00858								0.03861	0.04092	0.03432	0.02992	0.03652
0.00781	0.00825	0.00858	0.00858								0.03861	0.04092	0.03432	0.03003	0.03652
0.00781	0.00825	0.00858	0.00858								0.03861	0.04103	0.03443	0.03003	0.03663
0.00781	0.00825	0.00858	0.00858								0.03861	0.04103	0.03443	0.03003	0.03663
0.00781	0.00825	0.00858	0.00858								0.03872	0.04103	0.03443	0.03014	0.03663
0.00781	0.00825	0.00858	0.00858								0.03883	0.04103	0.03443	0.03014	0.03663
0.00781	0.00825	0.00858	0.00858								0.03883	0.04103	0.03443	0.03014	0.03663
0.00781	0.00825	0.00858	0.00858								0.03883	0.04103	0.03443	0.03014	0.03674
0.00781	0.00825	0.00858	0.00858								0.03883	0.04114	0.03443	0.03014	0.03674
0.00781	0.00825	0.00869	0.00869								0.03883	0.04114	0.03443	0.03014	0.03674
0.00781	0.00825	0.00869	0.00869								0.03894	0.04114	0.03443	0.03014	0.03685
0.00781	0.00825	0.00869	0.00869								0.03894	0.04114	0.03443	0.03014	0.03685
0.00792	0.00825	0.00869	0.00869								0.03894	0.04114	0.03454	0.03014	0.03685
0.00792	0.00836	0.00869	0.00869								0.03894	0.04125	0.03454	0.03025	0.03696
0.00792	0.00836	0.00869	0.00869								0.03905	0.04125	0.03454	0.03025	0.03696
0.00792	0.00836	0.00869	0.00869								0.03905	0.04125	0.03454	0.03025	0.03696
0.00792	0.00836	0.00869	0.00869								0.03905	0.04125	0.03454	0.03025	0.03696
0.00792	0.00836	0.00869	0.00869								0.03905	0.04125	0.03454	0.03036	0.03707
0.00792	0.00836	0.00869	0.00869								0.03905	0.04125	0.03465	0.03036	0.03707
0.00792	0.00836	0.00869	0.00869								0.03916	0.04125	0.03465	0.03036	0.03707
0.00792	0.00836	0.00869	0.00869								0.03916	0.04125	0.03476	0.03036	0.03707
0.00792	0.00836	0.00869	0.00869								0.03916	0.04125	0.03476	0.03036	0.03707
0.00792	0.00836	0.00869	0.00869								0.03916	0.04136	0.03476	0.03036	0.03707
0.00792	0.00836	0.00869	0.00869								0.03916	0.04136	0.03476	0.03036	0.03718
0.00792	0.00836	0.00869	0.00869								0.03927	0.04136	0.03476	0.03036	0.03718
0.00792	0.00836	0.00869	0.00869								0.03927	0.04136	0.03476	0.03036	0.03718
0.00792	0.00836	0.00869	0.00869								0.03927	0.04136	0.03476	0.03047	0.03718
0.00792	0.00836	0.00869	0.0088								0.03927	0.04147	0.03476	0.03047	0.03718
0.00792	0.00836	0.00869	0.0088								0.03927	0.04147	0.03487	0.03047	0.03718
0.00792	0.00836	0.00869	0.0088								0.03927	0.04147	0.03487	0.03047	0.03729
0.00803	0.00836	0.00869	0.0088								0.03927	0.04147	0.03487	0.03058	0.03729
0.00803	0.00836	0.00869	0.0088								0.03927	0.04147	0.03487	0.03058	0.03729
0.00803	0.00836	0.00869	0.0088								0.03927	0.04147	0.03487	0.03058	0.03729
0.00803	0.00836	0.00869	0.0088								0.03938	0.04158	0.03498	0.03069	0.0374
0.00803	0.00847	0.00869	0.0088								0.03938	0.04158	0.03498	0.03069	0.0374
0.00803	0.00847	0.00869	0.0088								0.03938	0.04158	0.03498	0.03069	0.0374
0.00803	0.00847	0.0088	0.0088								0.03938	0.04169	0.03498	0.03069	0.03751
0.00803	0.00847	0.0088	0.0088								0.03938	0.04169	0.03498	0.03069	0.03751
0.00803	0.00847	0.0088	0.0088								0.03949	0.04169	0.03498	0.03069	0.03751
0.00803	0.00847	0.0088	0.0088								0.03949	0.04169	0.03498	0.0308	0.03751
0.00803	0.00847	0.0088	0.0088								0.03949	0.0418	0.03498	0.0308	0.03751
0.00803	0.00847	0.0088	0.0088								0.03949	0.0418	0.03498	0.0308	0.03751
0.00803	0.00847	0.0088	0.0088								0.03949	0.0418	0.03498	0.0308	0.03751
0.00803	0.00847	0.0088	0.0088								0.03949	0.04191	0.03509	0.0308	0.03751
0.00803	0.00847	0.0088	0.0088								0.03949	0.04191	0.03509	0.03091	0.03762
0.00803	0.00847	0.0088	0.0088								0.0396	0.04191	0.03509	0.03091	0.03762
0.00803	0.00847	0.0088	0.0088								0.0396	0.04191	0.03509	0.03091	0.03773
0.00803	0.00847	0.0088	0.0088								0.0396	0.04191	0.03509	0.03091	0.03773
0.00803	0.00847	0.0088	0.0088								0.0396	0.04191	0.03509	0.03091	0.03773
0.00803	0.00847	0.0088	0.0088								0.0396	0.04202	0.0352	0.03091	0.03773
0.00803	0.00847	0.0088	0.0088								0.03971	0.04202	0.0352	0.03091	0.03784
0.00803	0.00847	0.0088	0.0088								0.03971	0.04202	0.0352	0.03102	0.03784
0.00803	0.00847	0.0088	0.0088								0.03971	0.04213	0.0352	0.03102	0.03784
0.00803	0.00847	0.0088	0.0088								0.03982	0.04213	0.0352	0.03102	0.03784
0.00803	0.00847	0.0088	0.0088								0.03982	0.04213	0.0352	0.03102	0.03784
0.00814	0.00847	0.0088	0.0088								0.03982	0.04213	0.03531	0.03102	0.03784
0.00814	0.00847	0.0088	0.0088								0.03982	0.04213	0.03531	0.03102	0.03784
0.00814	0.00847	0.0088	0.0088								0.03982	0.04224	0.03531	0.03102	0.03795
0.00814	0.00858	0.0088	0.0088								0.03982	0.04224	0.03531	0.03102	0.03795
0.00814	0.00858	0.0088	0.0088								0.03993	0.04224	0.03531	0.03102	0.03795
0.00814	0.00858	0.00891	0.00891								0.03993	0.04224	0.03531	0.03102	0.03795
0.00814	0.00858	0.00891	0.00891								0.03993	0.04224	0.03531	0.03113	0.03795
0.00814	0.00858	0.00891	0.00891								0.03993	0.04235	0.03542	0.03113	0.03806
0.00814	0.00858	0.00891	0.00891								0.03993	0.04235	0.03542	0.03113	0.03806
0.00814	0.00858	0.00891	0.00891								0.03993	0.04235	0.03553	0.03113	0.03806
0.00814	0.00858	0.00891	0.00891								0.04004	0.04235	0.03553	0.03113	0.03806
0.00814	0.00858	0.00891	0.00891								0.04004	0.04235	0.03564	0.03124	0.03806
0.00814	0.00858	0.00891	0.00891								0.04004	0.04235	0.03564	0.03124	0.03817
0.00814	0.00858	0.00891	0.00891								0.04004	0.04235	0.03564	0.03124	0.03817
0.00814	0.00858	0.00891	0.00891								0.04004	0.04235	0.03564	0.03124	0.03817
0.00814	0.00858	0.00891	0.00891								0.04004	0.04246	0.03564	0.03124	0.03817
0.00814	0.00858	0.00891	0.00891								0.04015	0.04246	0.03564	0.03124	0.03828
0.00814	0.00858	0.00891	0.00891								0.04015	0.04257	0.03564	0.03124	0.03828
0.00814	0.00858	0.00891	0.00891								0.04015	0.04257	0.03564	0.03135	0.03828
0.00814	0.00858	0.00891	0.00891								0.04026	0.04268	0.03575	0.03135	0.03828
0.00814	0.00858	0.00902	0.00891								0.04026	0.04268	0.03575	0.03146	0.03828
0.00814	0.00858	0.00902	0.00891								0.04026	0.04268	0.03575	0.03146	0.03828
0.00814	0.00858	0.00902	0.00891								0.04037	0.04268	0.03575	0.03146	0.03828
0.00814	0.00858	0.00902	0.00891								0.04037	0.04268	0.03575	0.03146	0.03839
0.00814	0.00858	0.00902	0.00891								0.04037	0.04268	0.03575	0.03146	0.03839
0.00814	0.00858	0.00902	0.00891								0.04037	0.04279	0.03586	0.03146	0.03839
0.00814	0.00858	0.00902	0.00891								0.04048	0.04279	0.03586	0.03157	0.03839
0.00814	0.00858	0.00902	0.00891								0.04048	0.04279	0.03586	0.03157	0.03839
0.00825	0.00858	0.00902	0.00891								0.04059	0.0429	0.03597	0.03157	0.03839
0.00825	0.00869	0.00902	0.00902								0.04059	0.0429	0.03597	0.03157	0.0385
0.00825	0.00869	0.00902	0.00902								0.04059	0.0429	0.03597	0.03157	0.0385
0.00825	0.00869	0.00902	0.00902								0.04059	0.0429	0.03597	0.03157	0.0385
0.00825	0.00869	0.00902	0.00902								0.04059	0.0429	0.03597	0.03157	0.0385
0.00825	0.00869	0.00902	0.00902								0.04059	0.0429	0.03597	0.03157	0.0385
0.00825	0.00869	0.00902	0.00902								0.04059	0.0429	0.03597	0.03168	0.0385
0.00825	0.00869	0.00902	0.00902								0.04059	0.0429	0.03608	0.03168	0.0385
0.00825	0.00869	0.00902	0.00902								0.04059	0.0429	0.03608	0.03168	0.03861
0.00825	0.00869	0.00902	0.00902								0.04059	0.04301	0.03608	0.03168	0.03861
0.00825	0.00869	0.00902	0.00902								0.0407	0.04301	0.03619	0.03179	0.03861
0.00825	0.00869	0.00902	0.00902								0.0407	0.04301	0.03619	0.03179	0.03872
0.00825	0.00869	0.00902	0.00902								0.04081	0.04301	0.03619	0.03179	0.03883
0.00825	0.00869	0.00902	0.00902								0.04081	0.04301	0.03619	0.03179	0.03883
0.00825	0.00869	0.00913	0.00902								0.04081	0.04301	0.03619	0.03179	0.03883
0.00825	0.00869	0.00913	0.00902								0.04081	0.04312	0.03619	0.03179	0.03883
0.00825	0.00869	0.00913	0.00902								0.04092	0.04312	0.03619	0.03179	0.03883
0.00825	0.00869	0.00913	0.00902								0.04092	0.04312	0.0363	0.03179	0.03883
0.00825	0.00869	0.00913	0.00902								0.04092	0.04312	0.0363	0.03179	0.03894
0.00825	0.00869	0.00913	0.00902								0.04092	0.04323	0.0363	0.03179	0.03894
0.00825	0.00869	0.00913	0.00902								0.04103	0.04323	0.0363	0.0319	0.03894
0.00825	0.00869	0.00913	0.00902								0.04103	0.04323	0.0363	0.0319	0.03894
0.00825	0.00869	0.00913	0.00913								0.04114	0.04323	0.0363	0.0319	0.03894
0.00825	0.00869	0.00913	0.00913								0.04114	0.04323	0.0363	0.0319	0.03894
0.00825	0.00869	0.00913	0.00913								0.04114	0.04323	0.03641	0.0319	0.03894
0.00825	0.00869	0.00913	0.00913								0.04114	0.04334	0.03641	0.0319	0.03894
0.00825	0.00869	0.00913	0.00913								0.04114	0.04334	0.03641	0.0319	0.03894
0.00825	0.0088	0.00913	0.00913								0.04125	0.04334	0.03652	0.03201	0.03894
0.00836	0.0088	0.00913	0.00913								0.04125	0.04334	0.03652	0.03201	0.03905
0.00836	0.0088	0.00913	0.00913								0.04125	0.04345	0.03652	0.03201	0.03905
0.00836	0.0088	0.00913	0.00913								0.04125	0.04345	0.03652	0.03201	0.03905
0.00836	0.0088	0.00913	0.00913								0.04136	0.04356	0.03663	0.03201	0.03905
0.00836	0.0088	0.00913	0.00913								0.04136	0.04356	0.03663	0.03201	0.03905
0.00836	0.0088	0.00913	0.00913								0.04136	0.04356	0.03663	0.03201	0.03905
0.00836	0.0088	0.00913	0.00913								0.04136	0.04367	0.03674	0.03201	0.03905
0.00836	0.0088	0.00913	0.00913								0.04136	0.04378	0.03674	0.03201	0.03916
0.00836	0.0088	0.00913	0.00913								0.04136	0.04378	0.03674	0.03201	0.03916
0.00836	0.0088	0.00913	0.00913								0.04136	0.04378	0.03674	0.03212	0.03927
0.00836	0.0088	0.00913	0.00913								0.04147	0.04389	0.03674	0.03212	0.03927
0.00836	0.0088	0.00913	0.00913								0.04147	0.04389	0.03674	0.03212	0.03927
0.00836	0.0088	0.00913	0.00924								0.04158	0.044	0.03685	0.03212	0.03927
0.00836	0.0088	0.00924	0.00924								0.04158	0.04411	0.03685	0.03212	0.03938
0.00836	0.0088	0.00924	0.00924								0.04158	0.04411	0.03685	0.03212	0.03938
0.00836	0.0088	0.00924	0.00924								0.04158	0.04411	0.03685	0.03212	0.03949
0.00836	0.0088	0.00924	0.00924								0.04158	0.04411	0.03685	0.03223	0.03949
0.00836	0.0088	0.00924	0.00924								0.04158	0.04422	0.03685	0.03223	0.03949
0.00836	0.0088	0.00924	0.00924								0.04158	0.04422	0.03696	0.03223	0.03949
0.00836	0.0088	0.00924	0.00924								0.04169	0.04422	0.03696	0.03223	0.03949
0.00847	0.00891	0.00924	0.00924								0.04169	0.04422	0.03696	0.03223	0.03949
0.00847	0.00891	0.00924	0.00924								0.04169	0.04422	0.03696	0.03223	0.0396
0.00847	0.00891	0.00924	0.00924								0.04169	0.04422	0.03707	0.03223	0.0396
0.00847	0.00891	0.00924	0.00924								0.04169	0.04422	0.03707	0.03223	0.0396
0.00847	0.00891	0.00924	0.00924								0.04169	0.04422	0.03707	0.03234	0.0396
0.00847	0.00891	0.00924	0.00924								0.04169	0.04422	0.03707	0.03234	0.0396
0.00847	0.00891	0.00924	0.00924								0.04169	0.04433	0.03707	0.03234	0.0396
0.00847	0.00891	0.00924	0.00924								0.04169	0.04433	0.03707	0.03234	0.0396
0.00847	0.00891	0.00924	0.00924								0.0418	0.04433	0.03707	0.03234	0.03971
0.00847	0.00891	0.00924	0.00924								0.0418	0.04433	0.03707	0.03245	0.03971
0.00847	0.00891	0.00924	0.00924								0.0418	0.04433	0.03707	0.03245	0.03971
0.00847	0.00891	0.00924	0.00924								0.0418	0.04444	0.03707	0.03245	0.03971
0.00847	0.00891	0.00924	0.00924								0.0418	0.04444	0.03707	0.03245	0.03971
0.00847	0.00891	0.00924	0.00924								0.04191	0.04444	0.03718	0.03245	0.03982
0.00847	0.00891	0.00924	0.00924								0.04191	0.04444	0.03718	0.03245	0.03982
0.00847	0.00891	0.00924	0.00935								0.04191	0.04444	0.03718	0.03245	0.03982
0.00847	0.00891	0.00924	0.00935								0.04191	0.04444	0.03718	0.03256	0.03982
0.00847	0.00891	0.00924	0.00935								0.04191	0.04444	0.03729	0.03256	0.03993
0.00847	0.00891	0.00935	0.00935								0.04191	0.04444	0.03729	0.03256	0.03993
0.00847	0.00891	0.00935	0.00935								0.04191	0.04444	0.03729	0.03256	0.04004
0.00847	0.00891	0.00935	0.00935								0.04191	0.04444	0.03729	0.03256	0.04004
0.00847	0.00891	0.00935	0.00935								0.04202	0.04444	0.03729	0.03267	0.04015
0.00847	0.00891	0.00935	0.00935								0.04202	0.04455	0.03729	0.03267	0.04015
0.00858	0.00891	0.00935	0.00935								0.04202	0.04455	0.03729	0.03267	0.04015
0.00858	0.00891	0.00935	0.00935								0.04202	0.04455	0.03729	0.03267	0.04015
0.00858	0.00902	0.00935	0.00935								0.04202	0.04455	0.0374	0.03267	0.04026
0.00858	0.00902	0.00935	0.00935								0.04202	0.04455	0.0374	0.03267	0.04026
0.00858	0.00902	0.00935	0.00935								0.04213	0.04466	0.03751	0.03267	0.04026
0.00858	0.00902	0.00935	0.00935								0.04213	0.04466	0.03751	0.03267	0.04026
0.00858	0.00902	0.00935	0.00946								0.04224	0.04466	0.03751	0.03278	0.04026
0.00858	0.00902	0.00935	0.00946								0.04224	0.04466	0.03751	0.03278	0.04037
0.00858	0.00902	0.00935	0.00946								0.04224	0.04466	0.03751	0.03278	0.04037
0.00858	0.00902	0.00935	0.00946								0.04224	0.04466	0.03751	0.03278	0.04037
0.00858	0.00902	0.00935	0.00946								0.04235	0.04466	0.03751	0.03278	0.04037
0.00858	0.00902	0.00935	0.00946								0.04246	0.04477	0.03762	0.03278	0.04037
0.00858	0.00902	0.00935	0.00946								0.04246	0.04477	0.03762	0.03289	0.04037
0.00858	0.00902	0.00935	0.00946								0.04246	0.04477	0.03773	0.03289	0.04037
0.00858	0.00902	0.00935	0.00946								0.04246	0.04477	0.03773	0.03289	0.04048
0.00858	0.00902	0.00935	0.00946								0.04257	0.04477	0.03773	0.03289	0.04048
0.00858	0.00902	0.00935	0.00946								0.04257	0.04477	0.03773	0.03289	0.04048
0.00858	0.00902	0.00935	0.00946								0.04257	0.04477	0.03784	0.03289	0.04048
0.00858	0.00902	0.00935	0.00946								0.04257	0.04477	0.03784	0.03289	0.04048
0.00858	0.00902	0.00935	0.00946								0.04268	0.04488	0.03784	0.03289	0.04048
0.00858	0.00902	0.00946	0.00946								0.04268	0.04488	0.03784	0.03289	0.04059
0.00858	0.00902	0.00946	0.00946								0.04268	0.04499	0.03784	0.03289	0.04059
0.00858	0.00902	0.00946	0.00946								0.04268	0.0451	0.03784	0.03289	0.04059
0.00869	0.00902	0.00946	0.00946								0.04268	0.0451	0.03784	0.03289	0.0407
0.00869	0.00902	0.00946	0.00946								0.04279	0.0451	0.03795	0.033	0.0407
0.00869	0.00902	0.00946	0.00946								0.0429	0.0451	0.03795	0.033	0.0407
0.00869	0.00902	0.00946	0.00946								0.0429	0.0451	0.03795	0.033	0.0407
0.00869	0.00913	0.00946	0.00946								0.0429	0.0451	0.03795	0.033	0.0407
0.00869	0.00913	0.00946	0.00946								0.0429	0.0451	0.03806	0.033	0.04081
0.00869	0.00913	0.00946	0.00946								0.04301	0.0451	0.03806	0.033	0.04081
0.00869	0.00913	0.00946	0.00957								0.04301	0.04521	0.03806	0.033	0.04081
0.00869	0.00913	0.00946	0.00957								0.04301	0.04521	0.03806	0.033	0.04081
0.00869	0.00913	0.00946	0.00957								0.04301	0.04521	0.03806	0.033	0.04081
0.00869	0.00913	0.00946	0.00957								0.04301	0.04521	0.03817	0.033	0.04092
0.00869	0.00913	0.00946	0.00957								0.04312	0.04521	0.03817	0.033	0.04092
0.00869	0.00913	0.00946	0.00957								0.04312	0.04521	0.03817	0.03311	0.04092
0.00869	0.00913	0.00946	0.00957								0.04323	0.04521	0.03817	0.03311	0.04103
0.00869	0.00913	0.00946	0.00957								0.04323	0.04521	0.03817	0.03311	0.04103
0.00869	0.00913	0.00946	0.00957								0.04323	0.04521	0.03828	0.03311	0.04103
0.0088	0.00913	0.00946	0.00957								0.04323	0.04532	0.03828	0.03311	0.04103
0.0088	0.00913	0.00946	0.00957								0.04323	0.04532	0.03828	0.03311	0.04103
0.0088	0.00913	0.00946	0.00957								0.04334	0.04532	0.03828	0.03322	0.04114
0.0088	0.00913	0.00946	0.00957								0.04334	0.04532	0.03828	0.03322	0.04114
0.0088	0.00913	0.00946	0.00957								0.04345	0.04532	0.03828	0.03322	0.04114
0.0088	0.00913	0.00957	0.00968								0.04345	0.04543	0.03839	0.03322	0.04114
0.0088	0.00913	0.00957	0.00968								0.04345	0.04543	0.03839	0.03322	0.04114
0.0088	0.00913	0.00957	0.00968								0.04345	0.04543	0.03839	0.03322	0.04114
0.0088	0.00913	0.00957	0.00968								0.04345	0.04543	0.03839	0.03333	0.04125
0.0088	0.00913	0.00957	0.00968								0.04345	0.04543	0.03839	0.03333	0.04125
0.0088	0.00913	0.00957	0.00968								0.04345	0.04543	0.03839	0.03333	0.04125
0.0088	0.00913	0.00957	0.00968								0.04356	0.04554	0.0385	0.03333	0.04125
0.0088	0.00913	0.00957	0.00968								0.04356	0.04554	0.0385	0.03333	0.04125
0.0088	0.00913	0.00957	0.00968								0.04356	0.04554	0.0385	0.03333	0.04136
0.0088	0.00924	0.00957	0.00968								0.04356	0.04554	0.0385	0.03333	0.04136
0.0088	0.00924	0.00957	0.00968								0.04356	0.04565	0.0385	0.03333	0.04136
0.0088	0.00924	0.00957	0.00968								0.04356	0.04565	0.0385	0.03344	0.04136
0.0088	0.00924	0.00957	0.00968								0.04356	0.04565	0.03861	0.03344	0.04136
0.0088	0.00924	0.00957	0.00968								0.04356	0.04565	0.03861	0.03344	0.04136
0.0088	0.00924	0.00957	0.00968								0.04367	0.04565	0.03861	0.03344	0.04136
0.0088	0.00924	0.00957	0.00968								0.04367	0.04565	0.03861	0.03344	0.04136
0.00891	0.00924	0.00957	0.00968								0.04367	0.04565	0.03861	0.03355	0.04136
0.00891	0.00924	0.00957	0.00968								0.04378	0.04565	0.03861	0.03355	0.04147
0.00891	0.00924	0.00957	0.00968								0.04378	0.04565	0.03872	0.03355	0.04158
0.00891	0.00924	0.00957	0.00968								0.04378	0.04565	0.03872	0.03355	0.04158
0.00891	0.00924	0.00957	0.00968								0.04378	0.04576	0.03872	0.03366	0.04158
0.00891	0.00924	0.00968	0.00968								0.04378	0.04576	0.03872	0.03366	0.04158
0.00891	0.00924	0.00968	0.00968								0.04389	0.04576	0.03872	0.03366	0.04158
0.00891	0.00924	0.00968	0.00968								0.04389	0.04576	0.03872	0.03366	0.04158
0.00891	0.00924	0.00968	0.00968								0.04389	0.04576	0.03872	0.03377	0.04169
0.00891	0.00924	0.00968	0.00968								0.044	0.04576	0.03883	0.03377	0.04169
0.00891	0.00924	0.00968	0.00968								0.044	0.04576	0.03883	0.03377	0.04169
0.00891	0.00924	0.00968	0.00968								0.044	0.04587	0.03883	0.03377	0.04169
0.00891	0.00924	0.00968	0.00968								0.044	0.04587	0.03883	0.03388	0.04169
0.00891	0.00924	0.00968	0.00979								0.044	0.04587	0.03894	0.03388	0.04169
0.00891	0.00924	0.00968	0.00979								0.04411	0.04587	0.03894	0.03388	0.0418
0.00891	0.00924	0.00968	0.00979								0.04411	0.04587	0.03894	0.03388	0.0418
0.00891	0.00924	0.00968	0.00979								0.04411	0.04587	0.03894	0.03388	0.0418
0.00891	0.00924	0.00968	0.00979								0.04411	0.04598	0.03894	0.03388	0.0418
0.00891	0.00924	0.00968	0.00979								0.04411	0.04598	0.03894	0.03399	0.04191
0.00891	0.00935	0.00968	0.00979								0.04411	0.04609	0.03894	0.03399	0.04191
0.00891	0.00935	0.00968	0.00979								0.04411	0.04609	0.03894	0.03399	0.04191
0.00891	0.00935	0.00968	0.00979								0.04411	0.04609	0.03894	0.03399	0.04191
0.00891	0.00935	0.00968	0.00979								0.04411	0.04609	0.03894	0.03399	0.04191
0.00891	0.00935	0.00968	0.00979								0.04422	0.0462	0.03905	0.03399	0.04191
0.00891	0.00935	0.00968	0.00979								0.04422	0.0462	0.03905	0.03399	0.04191
0.00891	0.00935	0.00968	0.00979								0.04422	0.04631	0.03905	0.03399	0.04202
0.00891	0.00935	0.00968	0.00979								0.04422	0.04631	0.03905	0.03399	0.04202
0.00891	0.00935	0.00968	0.00979								0.04422	0.04631	0.03905	0.0341	0.04202
0.00891	0.00935	0.00968	0.00979								0.04422	0.04631	0.03916	0.0341	0.04213
0.00902	0.00935	0.00968	0.00979								0.04422	0.04631	0.03916	0.0341	0.04213
0.00902	0.00935	0.00979	0.00979								0.04433	0.04631	0.03916	0.03421	0.04213
0.00902	0.00935	0.00979	0.0099								0.04433	0.04631	0.03916	0.03421	0.04213
0.00902	0.00935	0.00979	0.0099								0.04433	0.04642	0.03927	0.03421	0.04224
0.00902	0.00935	0.00979	0.0099								0.04433	0.04642	0.03927	0.03421	0.04224
0.00902	0.00935	0.00979	0.0099								0.04433	0.04642	0.03927	0.03421	0.04224
0.00902	0.00935	0.00979	0.0099								0.04433	0.04642	0.03927	0.03432	0.04235
0.00902	0.00935	0.00979	0.0099								0.04433	0.04653	0.03927	0.03432	0.04235
0.00902	0.00935	0.00979	0.0099								0.04444	0.04653	0.03927	0.03432	0.04235
0.00902	0.00935	0.00979	0.0099								0.04444	0.04653	0.03938	0.03432	0.04235
0.00902	0.00935	0.00979	0.0099								0.04444	0.04653	0.03938	0.03432	0.04235
0.00902	0.00935	0.00979	0.0099								0.04455	0.04653	0.03938	0.03432	0.04235
0.00902	0.00935	0.00979	0.0099								0.04455	0.04653	0.03938	0.03432	0.04235
0.00902	0.00935	0.00979	0.0099								0.04455	0.04653	0.03938	0.03443	0.04246
0.00902	0.00935	0.00979	0.0099								0.04455	0.04664	0.03938	0.03443	0.04246
0.00902	0.00935	0.00979	0.0099								0.04455	0.04664	0.03949	0.03443	0.04246
0.00902	0.00935	0.00979	0.0099								0.04455	0.04664	0.03949	0.03443	0.04246
0.00902	0.00935	0.00979	0.0099								0.04466	0.04664	0.03949	0.03443	0.04246
0.00902	0.00935	0.00979	0.0099								0.04466	0.04664	0.03949	0.03443	0.04257
0.00902	0.00946	0.00979	0.0099								0.04466	0.04675	0.03949	0.03454	0.04257
0.00902	0.00946	0.00979	0.0099								0.04466	0.04675	0.03949	0.03454	0.04268
0.00902	0.00946	0.00979	0.0099								0.04477	0.04675	0.03949	0.03454	0.04268
0.00902	0.00946	0.00979	0.0099								0.04477	0.04675	0.03949	0.03454	0.04268
0.00913	0.00946	0.00979	0.0099								0.04488	0.04675	0.0396	0.03465	0.04279
0.00913	0.00946	0.0099	0.0099								0.04488	0.04675	0.0396	0.03465	0.04279
0.00913	0.00946	0.0099	0.0099								0.04488	0.04686	0.0396	0.03465	0.04279
0.00913	0.00946	0.0099	0.01001								0.04488	0.04686	0.0396	0.03465	0.04279
0.00913	0.00946	0.0099	0.01001								0.04499	0.04686	0.03971	0.03465	0.04279
0.00913	0.00946	0.0099	0.01001								0.04499	0.04686	0.03971	0.03465	0.04279
0.00913	0.00946	0.0099	0.01001								0.0451	0.04697	0.03971	0.03465	0.04279
0.00913	0.00946	0.0099	0.01001								0.0451	0.04697	0.03971	0.03465	0.04279
0.00913	0.00946	0.0099	0.01001								0.0451	0.04697	0.03971	0.03476	0.04279
0.00913	0.00946	0.0099	0.01001								0.0451	0.04697	0.03971	0.03476	0.0429
0.00913	0.00946	0.0099	0.01001								0.04521	0.04697	0.03971	0.03476	0.0429
0.00913	0.00946	0.0099	0.01001								0.04521	0.04697	0.03971	0.03476	0.0429
0.00913	0.00946	0.0099	0.01001								0.04521	0.04697	0.03971	0.03487	0.0429
0.00913	0.00946	0.0099	0.01001								0.04521	0.04697	0.03982	0.03487	0.0429
0.00913	0.00946	0.0099	0.01001								0.04532	0.04708	0.03982	0.03487	0.0429
0.00913	0.00946	0.0099	0.01001								0.04532	0.04708	0.03982	0.03487	0.0429
0.00913	0.00946	0.0099	0.01001								0.04543	0.04719	0.03993	0.03487	0.0429
0.00913	0.00946	0.0099	0.01001								0.04543	0.04719	0.03993	0.03498	0.0429
0.00913	0.00946	0.0099	0.01001								0.04554	0.04719	0.03993	0.03498	0.04301
0.00913	0.00946	0.0099	0.01001								0.04554	0.04719	0.03993	0.03498	0.04301
0.00913	0.00946	0.0099	0.01001								0.04554	0.04719	0.04004	0.03498	0.04301
0.00913	0.00946	0.0099	0.01012								0.04554	0.0473	0.04004	0.03498	0.04301
0.00913	0.00946	0.0099	0.01012								0.04554	0.0473	0.04004	0.03498	0.04312
0.00913	0.00946	0.0099	0.01012								0.04554	0.0473	0.04004	0.03498	0.04323
0.00913	0.00946	0.0099	0.01012								0.04565	0.0473	0.04004	0.03509	0.04323
0.00913	0.00946	0.0099	0.01012								0.04565	0.0473	0.04015	0.03509	0.04323
0.00913	0.00957	0.0099	0.01012								0.04565	0.0473	0.04015	0.03509	0.04323
0.00913	0.00957	0.0099	0.01012								0.04565	0.0473	0.04015	0.03509	0.04323
0.00913	0.00957	0.0099	0.01012								0.04576	0.04741	0.04015	0.03509	0.04334
0.00913	0.00957	0.0099	0.01012								0.04576	0.04741	0.04015	0.03509	0.04345
0.00924	0.00957	0.0099	0.01012								0.04576	0.04741	0.04015	0.0352	0.04345
0.00924	0.00957	0.0099	0.01012								0.04576	0.04741	0.04015	0.0352	0.04345
0.00924	0.00957	0.0099	0.01012								0.04576	0.04741	0.04015	0.0352	0.04345
0.00924	0.00957	0.0099	0.01012								0.04587	0.04752	0.04015	0.0352	0.04345
0.00924	0.00957	0.0099	0.01012								0.04587	0.04752	0.04026	0.0352	0.04345
0.00924	0.00957	0.01001	0.01012								0.04587	0.04752	0.04026	0.0352	0.04345
0.00924	0.00957	0.01001	0.01012								0.04587	0.04752	0.04026	0.0352	0.04345
0.00924	0.00957	0.01001	0.01012								0.04587	0.04752	0.04026	0.0352	0.04345
0.00924	0.00957	0.01001	0.01012								0.04587	0.04752	0.04026	0.03531	0.04356
0.00924	0.00957	0.01001	0.01012								0.04587	0.04752	0.04026	0.03531	0.04356
0.00924	0.00957	0.01001	0.01012								0.04587	0.04763	0.04037	0.03542	0.04356
0.00924	0.00957	0.01001	0.01012								0.04587	0.04763	0.04037	0.03553	0.04356
0.00924	0.00957	0.01001	0.01012								0.04598	0.04774	0.04037	0.03553	0.04356
0.00924	0.00957	0.01001	0.01012								0.04598	0.04774	0.04037	0.03553	0.04367
0.00924	0.00957	0.01001	0.01012								0.04598	0.04774	0.04037	0.03564	0.04367
0.00924	0.00957	0.01001	0.01012								0.04598	0.04774	0.04037	0.03564	0.04367
0.00924	0.00957	0.01001	0.01012								0.04598	0.04774	0.04037	0.03564	0.04367
0.00924	0.00957	0.01001	0.01012								0.04598	0.04785	0.04037	0.03564	0.04378
0.00924	0.00957	0.01001	0.01012								0.04598	0.04785	0.04048	0.03564	0.04378
0.00924	0.00957	0.01001	0.01012								0.04609	0.04785	0.04048	0.03564	0.04378
0.00924	0.00957	0.01001	0.01012								0.04609	0.04796	0.04048	0.03575	0.04378
0.00924	0.00957	0.01001	0.01023								0.04609	0.04796	0.04048	0.03575	0.04389
0.00924	0.00957	0.01001	0.01023								0.0462	0.04796	0.04048	0.03575	0.04389
0.00924	0.00957	0.01001	0.01023								0.0462	0.04796	0.04048	0.03586	0.04389
0.00924	0.00957	0.01001	0.01023								0.04631	0.04807	0.04048	0.03586	0.04389
0.00924	0.00957	0.01001	0.01023								0.04631	0.04807	0.04048	0.03586	0.04389
0.00924	0.00957	0.01001	0.01023								0.04631	0.04818	0.04048	0.03586	0.044
0.00935	0.00957	0.01001	0.01023								0.04631	0.04818	0.04048	0.03586	0.044
0.00935	0.00957	0.01001	0.01023								0.04631	0.04818	0.04059	0.03586	0.044
0.00935	0.00957	0.01001	0.01023								0.04631	0.04818	0.04059	0.03597	0.044
0.00935	0.00957	0.01001	0.01023								0.04631	0.04829	0.04059	0.03597	0.044
0.00935	0.00957	0.01001	0.01023								0.04642	0.04829	0.04059	0.03597	0.04411
0.00935	0.00968	0.01001	0.01023								0.04642	0.04829	0.04059	0.03597	0.04411
0.00935	0.00968	0.01012	0.01023								0.04642	0.04829	0.04059	0.03608	0.04411
0.00935	0.00968	0.01012	0.01023								0.04642	0.0484	0.0407	0.03608	0.04411
0.00935	0.00968	0.01012	0.01023								0.04642	0.0484	0.0407	0.03608	0.04411
0.00935	0.00968	0.01012	0.01023								0.04642	0.0484	0.0407	0.03608	0.04411
0.00935	0.00968	0.01012	0.01023								0.04653	0.0484	0.0407	0.03619	0.04422
0.00935	0.00968	0.01012	0.01023								0.04653	0.0484	0.0407	0.03619	0.04422
0.00935	0.00968	0.01012	0.01023								0.04653	0.04851	0.0407	0.03619	0.04422
0.00935	0.00968	0.01012	0.01023								0.04653	0.04851	0.04081	0.03619	0.04433
0.00935	0.00968	0.01012	0.01023								0.04653	0.04851	0.04081	0.03619	0.04433
0.00935	0.00968	0.01012	0.01023								0.04653	0.04851	0.04081	0.03619	0.04433
0.00935	0.00968	0.01012	0.01023								0.04664	0.04862	0.04081	0.03619	0.04433
0.00935	0.00968	0.01012	0.01034								0.04664	0.04862	0.04092	0.0363	0.04433
0.00935	0.00968	0.01012	0.01034								0.04664	0.04862	0.04092	0.0363	0.04444
0.00935	0.00968	0.01012	0.01034								0.04664	0.04873	0.04092	0.0363	0.04444
0.00935	0.00968	0.01012	0.01034								0.04664	0.04873	0.04092	0.0363	0.04444
0.00935	0.00979	0.01012	0.01034								0.04675	0.04873	0.04092	0.0363	0.04444
0.00935	0.00979	0.01012	0.01034								0.04675	0.04873	0.04092	0.0363	0.04444
0.00935	0.00979	0.01012	0.01034								0.04675	0.04884	0.04092	0.0363	0.04444
0.00935	0.00979	0.01012	0.01034								0.04675	0.04884	0.04103	0.0363	0.04444
0.00935	0.00979	0.01012	0.01034								0.04686	0.04884	0.04103	0.03641	0.04444
0.00935	0.00979	0.01012	0.01034								0.04686	0.04884	0.04114	0.03641	0.04444
0.00946	0.00979	0.01023	0.01034								0.04686	0.04884	0.04114	0.03641	0.04444
0.00946	0.00979	0.01023	0.01034								0.04686	0.04895	0.04114	0.03641	0.04455
0.00946	0.00979	0.01023	0.01034								0.04686	0.04895	0.04114	0.03641	0.04455
0.00946	0.00979	0.01023	0.01034								0.04686	0.04895	0.04114	0.03641	0.04455
0.00946	0.00979	0.01023	0.01034								0.04686	0.04895	0.04125	0.03652	0.04455
0.00946	0.00979	0.01023	0.01034								0.04686	0.04906	0.04125	0.03652	0.04455
0.00946	0.00979	0.01023	0.01034								0.04686	0.04906	0.04125	0.03652	0.04466
0.00946	0.00979	0.01023	0.01034								0.04686	0.04906	0.04125	0.03652	0.04466
0.00946	0.00979	0.01023	0.01034								0.04697	0.04906	0.04125	0.03652	0.04466
0.00946	0.00979	0.01023	0.01034								0.04697	0.04906	0.04125	0.03652	0.04466
0.00946	0.00979	0.01023	0.01034								0.04697	0.04917	0.04136	0.03663	0.04466
0.00946	0.00979	0.01023	0.01034								0.04708	0.04917	0.04136	0.03663	0.04477
0.00946	0.00979	0.01023	0.01045								0.04708	0.04917	0.04136	0.03663	0.04477
0.00946	0.00979	0.01023	0.01045								0.04708	0.04917	0.04136	0.03663	0.04477
0.00946	0.00979	0.01023	0.01045								0.04719	0.04917	0.04136	0.03663	0.04477
0.00946	0.00979	0.01023	0.01045								0.04719	0.04928	0.04136	0.03663	0.04477
0.00946	0.00979	0.01023	0.01045								0.04719	0.04928	0.04136	0.03663	0.04477
0.00946	0.00979	0.01023	0.01045								0.04719	0.04928	0.04147	0.03663	0.04488
0.00946	0.00979	0.01023	0.01045								0.04719	0.04928	0.04147	0.03663	0.04488
0.00946	0.00979	0.01023	0.01045								0.04719	0.04928	0.04147	0.03674	0.04488
0.00957	0.00979	0.01023	0.01045								0.04719	0.04928	0.04158	0.03674	0.04488
0.00957	0.0099	0.01023	0.01045								0.04719	0.04928	0.04158	0.03674	0.04488
0.00957	0.0099	0.01023	0.01045								0.0473	0.04928	0.04169	0.03674	0.04488
0.00957	0.0099	0.01023	0.01045								0.0473	0.04928	0.04169	0.03674	0.04488
0.00957	0.0099	0.01023	0.01045								0.0473	0.04928	0.04169	0.03674	0.04499
0.00957	0.0099	0.01023	0.01045								0.0473	0.04939	0.04169	0.03674	0.04499
0.00957	0.0099	0.01023	0.01045								0.04741	0.04939	0.04169	0.03685	0.04499
0.00957	0.0099	0.01023	0.01045								0.04741	0.04939	0.04169	0.03685	0.04499
0.00957	0.0099	0.01034	0.01045								0.04741	0.04939	0.0418	0.03685	0.04499
0.00957	0.0099	0.01034	0.01045								0.04741	0.04939	0.0418	0.03685	0.04499
0.00957	0.0099	0.01034	0.01045								0.04752	0.04939	0.0418	0.03685	0.04499
0.00957	0.0099	0.01034	0.01045								0.04752	0.04939	0.0418	0.03696	0.04499
0.00957	0.0099	0.01034	0.01045								0.04752	0.0495	0.0418	0.03696	0.04499
0.00957	0.0099	0.01034	0.01045								0.04763	0.0495	0.04191	0.03696	0.04499
0.00957	0.0099	0.01034	0.01045								0.04763	0.0495	0.04191	0.03696	0.04499
0.00957	0.0099	0.01034	0.01045								0.04763	0.0495	0.04191	0.03696	0.04499
0.00957	0.0099	0.01034	0.01045								0.04763	0.0495	0.04191	0.03696	0.0451
0.00957	0.0099	0.01034	0.01045								0.04763	0.0495	0.04191	0.03696	0.0451
0.00957	0.0099	0.01034	0.01045								0.04774	0.0495	0.04202	0.03696	0.0451
0.00957	0.01001	0.01034	0.01045								0.04774	0.04961	0.04202	0.03707	0.0451
0.00957	0.01001	0.01034	0.01045								0.04774	0.04961	0.04202	0.03707	0.0451
0.00957	0.01001	0.01034	0.01045								0.04774	0.04961	0.04202	0.03707	0.0451
0.00957	0.01001	0.01034	0.01045								0.04774	0.04961	0.04202	0.03707	0.0451
0.00957	0.01001	0.01034	0.01045								0.04774	0.04961	0.04213	0.03707	0.04521
0.00957	0.01001	0.01034	0.01045								0.04785	0.04961	0.04213	0.03718	0.04532
0.00957	0.01001	0.01034	0.01045								0.04785	0.04972	0.04213	0.03718	0.04532
0.00957	0.01001	0.01034	0.01056								0.04785	0.04972	0.04213	0.03718	0.04532
0.00957	0.01001	0.01034	0.01056								0.04785	0.04972	0.04213	0.03718	0.04532
0.00957	0.01001	0.01034	0.01056								0.04785	0.04972	0.04213	0.03729	0.04532
0.00968	0.01001	0.01034	0.01056								0.04785	0.04972	0.04224	0.03729	0.04532
0.00968	0.01001	0.01034	0.01056								0.04785	0.04972	0.04224	0.03729	0.04532
0.00968	0.01001	0.01034	0.01056								0.04785	0.04983	0.04235	0.03729	0.04543
0.00968	0.01001	0.01034	0.01056								0.04785	0.04983	0.04235	0.03729	0.04543
0.00968	0.01001	0.01034	0.01056								0.04796	0.04983	0.04235	0.0374	0.04543
0.00968	0.01001	0.01034	0.01056								0.04796	0.04983	0.04246	0.03751	0.04543
0.00968	0.01001	0.01034	0.01056								0.04796	0.04994	0.04246	0.03751	0.04543
0.00968	0.01001	0.01034	0.01056								0.04796	0.04994	0.04246	0.03751	0.04554
0.00968	0.01001	0.01034	0.01067								0.04807	0.04994	0.04246	0.03751	0.04554
0.00968	0.01001	0.01045	0.01067								0.04818	0.04994	0.04246	0.03751	0.04554
0.00968	0.01001	0.01045	0.01067								0.04818	0.04994	0.04246	0.03751	0.04554
0.00968	0.01001	0.01045	0.01067								0.04818	0.05005	0.04246	0.03751	0.04554
0.00968	0.01001	0.01045	0.01067								0.04818	0.05005	0.04257	0.03751	0.04565
0.00968	0.01001	0.01045	0.01067								0.04818	0.05005	0.04257	0.03751	0.04565
0.00968	0.01001	0.01045	0.01067								0.04818	0.05005	0.04257	0.03751	0.04565
0.00968	0.01001	0.01045	0.01067								0.04829	0.05005	0.04257	0.03762	0.04565
0.00968	0.01012	0.01045	0.01067								0.04829	0.05005	0.04257	0.03762	0.04576
0.00968	0.01012	0.01045	0.01067								0.04829	0.05005	0.04257	0.03762	0.04576
0.00968	0.01012	0.01045	0.01067								0.04829	0.05005	0.04268	0.03762	0.04576
0.00968	0.01012	0.01045	0.01067								0.04829	0.05016	0.04268	0.03762	0.04576
0.00968	0.01012	0.01045	0.01067								0.04829	0.05016	0.04268	0.03762	0.04576
0.00968	0.01012	0.01045	0.01067								0.04829	0.05016	0.04268	0.03762	0.04576
0.00968	0.01012	0.01045	0.01067								0.04829	0.05016	0.04268	0.03773	0.04587
0.00968	0.01012	0.01045	0.01067								0.04829	0.05016	0.04268	0.03773	0.04587
0.00968	0.01012	0.01045	0.01067								0.0484	0.05027	0.04268	0.03773	0.04587
0.00979	0.01012	0.01045	0.01067								0.0484	0.05027	0.04268	0.03784	0.04598
0.00979	0.01012	0.01045	0.01067								0.04851	0.05027	0.04268	0.03784	0.04598
0.00979	0.01012	0.01045	0.01067								0.04851	0.05038	0.04268	0.03784	0.04598
0.00979	0.01012	0.01045	0.01067								0.04851	0.05038	0.04268	0.03784	0.04598
0.00979	0.01012	0.01045	0.01067								0.04862	0.05038	0.04268	0.03784	0.04598
0.00979	0.01012	0.01045	0.01067								0.04862	0.05038	0.04279	0.03784	0.04598
0.00979	0.01012	0.01045	0.01067								0.04862	0.05038	0.04279	0.03784	0.04598
0.00979	0.01012	0.01045	0.01067								0.04862	0.05038	0.04279	0.03795	0.04598
0.00979	0.01012	0.01056	0.01067								0.04862	0.05038	0.04279	0.03795	0.04609
0.00979	0.01012	0.01056	0.01067								0.04884	0.05049	0.04279	0.03795	0.04609
0.00979	0.01012	0.01056	0.01067								0.04884	0.05049	0.04279	0.03795	0.04609
0.00979	0.01012	0.01056	0.01067								0.04884	0.05049	0.04279	0.03795	0.04609
0.00979	0.01012	0.01056	0.01067								0.04884	0.05049	0.0429	0.03795	0.04609
0.00979	0.01012	0.01056	0.01067								0.04884	0.0506	0.0429	0.03806	0.04609
0.00979	0.01012	0.01056	0.01078								0.04884	0.0506	0.0429	0.03806	0.04609
0.00979	0.01012	0.01056	0.01078								0.04895	0.05071	0.0429	0.03806	0.04609
0.00979	0.01012	0.01056	0.01078								0.04895	0.05071	0.0429	0.03806	0.0462
0.00979	0.01023	0.01056	0.01078								0.04895	0.05071	0.0429	0.03817	0.0462
0.00979	0.01023	0.01056	0.01078								0.04895	0.05071	0.0429	0.03817	0.0462
0.00979	0.01023	0.01056	0.01078								0.04895	0.05082	0.04301	0.03817	0.0462
0.00979	0.01023	0.01056	0.01078								0.04906	0.05082	0.04301	0.03817	0.0462
0.00979	0.01023	0.01056	0.01078								0.04906	0.05082	0.04301	0.03817	0.0462
0.00979	0.01023	0.01056	0.01078								0.04906	0.05093	0.04301	0.03817	0.0462
0.00979	0.01023	0.01056	0.01078								0.04917	0.05093	0.04301	0.03817	0.0462
0.00979	0.01023	0.01056	0.01078								0.04917	0.05093	0.04301	0.03817	0.04631
0.00979	0.01023	0.01056	0.01078								0.04917	0.05093	0.04301	0.03817	0.04642
0.00979	0.01023	0.01056	0.01078								0.04917	0.05093	0.04312	0.03817	0.04642
0.00979	0.01023	0.01056	0.01078								0.04917	0.05093	0.04312	0.03828	0.04642
0.00979	0.01023	0.01056	0.01078								0.04917	0.05104	0.04312	0.03828	0.04642
0.00979	0.01023	0.01056	0.01078								0.04917	0.05104	0.04312	0.03828	0.04642
0.00979	0.01023	0.01056	0.01078								0.04917	0.05104	0.04312	0.03828	0.04642
0.00979	0.01023	0.01056	0.01078								0.04928	0.05104	0.04312	0.03828	0.04642
0.0099	0.01023	0.01067	0.01078								0.04928	0.05104	0.04312	0.03828	0.04642
0.0099	0.01023	0.01067	0.01078								0.04928	0.05104	0.04323	0.03828	0.04653
0.0099	0.01023	0.01067	0.01078								0.04928	0.05115	0.04323	0.03828	0.04653
0.0099	0.01023	0.01067	0.01078								0.04928	0.05115	0.04323	0.03828	0.04653
0.0099	0.01023	0.01067	0.01078								0.04939	0.05115	0.04323	0.03839	0.04653
0.0099	0.01023	0.01067	0.01078								0.04939	0.05115	0.04323	0.03839	0.04653
0.0099	0.01023	0.01067	0.01078								0.0495	0.05115	0.04323	0.03839	0.04653
0.0099	0.01023	0.01067	0.01078								0.0495	0.05115	0.04323	0.03839	0.04664
0.0099	0.01023	0.01067	0.01089								0.0495	0.05115	0.04323	0.03839	0.04664
0.0099	0.01023	0.01067	0.01089								0.0495	0.05126	0.04323	0.03839	0.04664
0.0099	0.01023	0.01067	0.01089								0.0495	0.05126	0.04323	0.0385	0.04675
0.0099	0.01023	0.01067	0.01089								0.04961	0.05126	0.04323	0.0385	0.04675
0.0099	0.01023	0.01067	0.01089								0.04961	0.05126	0.04323	0.0385	0.04675
0.0099	0.01023	0.01067	0.01089								0.04961	0.05126	0.04323	0.0385	0.04675
0.0099	0.01023	0.01067	0.01089								0.04961	0.05126	0.04334	0.0385	0.04675
0.0099	0.01023	0.01067	0.01089								0.04961	0.05126	0.04334	0.0385	0.04686
0.0099	0.01023	0.01067	0.01089								0.04961	0.05126	0.04334	0.0385	0.04686
0.0099	0.01023	0.01067	0.01089								0.04961	0.05137	0.04334	0.0385	0.04697
0.0099	0.01023	0.01067	0.01089								0.04961	0.05137	0.04334	0.0385	0.04697
0.0099	0.01034	0.01067	0.01089								0.04972	0.05137	0.04334	0.0385	0.04697
0.0099	0.01034	0.01067	0.01089								0.04972	0.05137	0.04345	0.0385	0.04697
0.0099	0.01034	0.01067	0.01089								0.04983	0.05137	0.04345	0.0385	0.04697
0.0099	0.01034	0.01067	0.01089								0.04983	0.05137	0.04345	0.03861	0.04697
0.0099	0.01034	0.01067	0.01089								0.04983	0.05148	0.04356	0.03861	0.04697
0.0099	0.01034	0.01067	0.01089								0.04983	0.05148	0.04356	0.03861	0.04697
0.0099	0.01034	0.01067	0.01089								0.04983	0.05148	0.04356	0.03861	0.04708
0.0099	0.01034	0.01067	0.01089								0.04983	0.05148	0.04356	0.03861	0.04708
0.0099	0.01034	0.01067	0.01089								0.04983	0.05148	0.04356	0.03872	0.04708
0.0099	0.01034	0.01067	0.01089								0.04994	0.05148	0.04356	0.03872	0.04708
0.0099	0.01034	0.01067	0.01089								0.04994	0.05148	0.04356	0.03872	0.04708
0.0099	0.01034	0.01078	0.01089								0.05005	0.05159	0.04356	0.03872	0.04708
0.0099	0.01034	0.01078	0.01089								0.05005	0.05159	0.04367	0.03872	0.04708
0.01001	0.01034	0.01078	0.01089								0.05005	0.0517	0.04367	0.03872	0.04708
0.01001	0.01034	0.01078	0.011								0.05005	0.0517	0.04367	0.03883	0.04719
0.01001	0.01034	0.01078	0.011								0.05016	0.0517	0.04367	0.03883	0.04719
0.01001	0.01034	0.01078	0.011								0.05016	0.0517	0.04378	0.03883	0.0473
0.01001	0.01034	0.01078	0.011								0.05016	0.0517	0.04378	0.03894	0.0473
0.01001	0.01034	0.01078	0.011								0.05027	0.0517	0.04378	0.03894	0.0473
0.01001	0.01034	0.01078	0.011								0.05027	0.0517	0.04389	0.03894	0.0473
0.01001	0.01034	0.01078	0.011								0.05027	0.0517	0.04389	0.03894	0.0473
0.01001	0.01034	0.01078	0.011								0.05038	0.05181	0.04389	0.03894	0.0473
0.01001	0.01034	0.01078	0.011								0.05038	0.05181	0.04389	0.03894	0.0473
0.01001	0.01034	0.01078	0.011								0.05038	0.05181	0.04389	0.03894	0.0473
0.01001	0.01034	0.01078	0.011								0.05038	0.05181	0.04389	0.03894	0.04741
0.01001	0.01034	0.01078	0.011								0.05049	0.05181	0.04389	0.03905	0.04741
0.01001	0.01034	0.01078	0.011								0.05049	0.05192	0.04389	0.03905	0.04741
0.01001	0.01034	0.01078	0.011								0.05049	0.05214	0.044	0.03905	0.04752
0.01001	0.01045	0.01078	0.011								0.05049	0.05214	0.044	0.03905	0.04752
0.01001	0.01045	0.01078	0.011								0.05049	0.05214	0.044	0.03905	0.04763
0.01001	0.01045	0.01078	0.011								0.05049	0.05214	0.044	0.03905	0.04763
0.01001	0.01045	0.01078	0.011								0.0506	0.05214	0.044	0.03916	0.04763
0.01001	0.01045	0.01078	0.011								0.0506	0.05214	0.044	0.03916	0.04763
0.01001	0.01045	0.01078	0.011								0.05071	0.05214	0.044	0.03916	0.04763
0.01001	0.01045	0.01078	0.011								0.05071	0.05214	0.044	0.03916	0.04774
0.01001	0.01045	0.01078	0.011								0.05071	0.05225	0.04411	0.03916	0.04774
0.01001	0.01045	0.01078	0.011								0.05071	0.05225	0.04411	0.03916	0.04774
0.01001	0.01045	0.01078	0.011								0.05082	0.05225	0.04411	0.03916	0.04774
0.01001	0.01045	0.01078	0.011								0.05082	0.05225	0.04411	0.03916	0.04774
0.01012	0.01045	0.01078	0.011								0.05082	0.05225	0.04411	0.03916	0.04774
0.01012	0.01045	0.01078	0.011								0.05082	0.05236	0.04411	0.03916	0.04774
0.01012	0.01045	0.01089	0.01111								0.05082	0.05236	0.04422	0.03927	0.04774
0.01012	0.01045	0.01089	0.01111								0.05082	0.05236	0.04422	0.03927	0.04785
0.01012	0.01045	0.01089	0.01111								0.05093	0.05236	0.04422	0.03927	0.04785
0.01012	0.01045	0.01089	0.01111								0.05093	0.05236	0.04422	0.03927	0.04785
0.01012	0.01045	0.01089	0.01111								0.05093	0.05236	0.04422	0.03927	0.04785
0.01012	0.01056	0.01089	0.01111								0.05093	0.05236	0.04422	0.03927	0.04785
0.01012	0.01056	0.01089	0.01111								0.05093	0.05236	0.04422	0.03927	0.04785
0.01012	0.01056	0.01089	0.01111								0.05104	0.05236	0.04433	0.03927	0.04785
0.01012	0.01056	0.01089	0.01111								0.05104	0.05247	0.04433	0.03927	0.04785
0.01012	0.01056	0.01089	0.01111								0.05104	0.05247	0.04433	0.03927	0.04785
0.01012	0.01056	0.01089	0.01111								0.05104	0.05247	0.04433	0.03938	0.04785
0.01012	0.01056	0.01089	0.01111								0.05104	0.05247	0.04433	0.03938	0.04796
0.01012	0.01056	0.01089	0.01111								0.05104	0.05258	0.04433	0.03938	0.04796
0.01012	0.01056	0.01089	0.01111								0.05104	0.05258	0.04433	0.03938	0.04796
0.01012	0.01056	0.01089	0.01111								0.05104	0.05258	0.04444	0.03938	0.04796
0.01012	0.01056	0.01089	0.01111								0.05104	0.05258	0.04444	0.03938	0.04807
0.01012	0.01056	0.01089	0.01111								0.05115	0.05258	0.04444	0.03938	0.04807
0.01012	0.01056	0.01089	0.01111								0.05115	0.05269	0.04444	0.03938	0.04807
0.01012	0.01056	0.01089	0.01111								0.05115	0.05269	0.04444	0.03938	0.04807
0.01012	0.01056	0.01089	0.01111								0.05115	0.05269	0.04455	0.03938	0.04807
0.01012	0.01056	0.01089	0.01111								0.05115	0.05269	0.04455	0.03949	0.04807
0.01012	0.01056	0.01089	0.01111								0.05115	0.0528	0.04455	0.03949	0.04818
0.01012	0.01056	0.01089	0.01111								0.05115	0.0528	0.04455	0.03949	0.04818
0.01023	0.01056	0.01089	0.01111								0.05115	0.0528	0.04455	0.03949	0.04818
0.01023	0.01056	0.011	0.01111								0.05115	0.0528	0.04455	0.03949	0.04818
0.01023	0.01056	0.011	0.01111								0.05115	0.0528	0.04455	0.0396	0.04818
0.01023	0.01056	0.011	0.01111								0.05126	0.05291	0.04455	0.0396	0.04818
0.01023	0.01056	0.011	0.01122								0.05126	0.05291	0.04466	0.0396	0.04818
0.01023	0.01056	0.011	0.01122								0.05126	0.05291	0.04466	0.0396	0.04818
0.01023	0.01067	0.011	0.01122								0.05137	0.05291	0.04466	0.0396	0.04818
0.01023	0.01067	0.011	0.01122								0.05137	0.05291	0.04466	0.0396	0.04829
0.01023	0.01067	0.011	0.01122								0.05137	0.05291	0.04466	0.0396	0.04829
0.01023	0.01067	0.011	0.01122								0.05137	0.05291	0.04477	0.0396	0.04829
0.01023	0.01067	0.011	0.01122								0.05137	0.05302	0.04477	0.0396	0.04829
0.01023	0.01067	0.011	0.01122								0.05137	0.05302	0.04477	0.0396	0.0484
0.01023	0.01067	0.011	0.01122								0.05137	0.05302	0.04477	0.03971	0.0484
0.01023	0.01067	0.011	0.01122								0.05137	0.05302	0.04477	0.03971	0.0484
0.01023	0.01067	0.011	0.01122								0.05137	0.05313	0.04477	0.03982	0.0484
0.01023	0.01067	0.011	0.01122								0.05137	0.05313	0.04477	0.03982	0.0484
0.01023	0.01067	0.011	0.01122								0.05137	0.05313	0.04477	0.03982	0.0484
0.01023	0.01067	0.011	0.01122								0.05137	0.05313	0.04488	0.03982	0.0484
0.01023	0.01067	0.011	0.01122								0.05137	0.05313	0.04488	0.03982	0.04851
0.01023	0.01067	0.011	0.01122								0.05137	0.05313	0.04488	0.03982	0.04851
0.01023	0.01067	0.011	0.01122								0.05148	0.05313	0.04488	0.03982	0.04851
0.01023	0.01067	0.011	0.01122								0.05148	0.05313	0.04488	0.03982	0.04851
0.01023	0.01067	0.011	0.01122								0.05148	0.05313	0.04488	0.03993	0.04862
0.01023	0.01067	0.011	0.01122								0.05148	0.05324	0.04499	0.03993	0.04862
0.01023	0.01067	0.011	0.01122								0.05148	0.05324	0.04499	0.03993	0.04862
0.01034	0.01067	0.011	0.01122								0.05148	0.05324	0.04499	0.03993	0.04862
0.01034	0.01067	0.011	0.01122								0.05148	0.05324	0.04499	0.03993	0.04862
0.01034	0.01067	0.011	0.01122								0.05148	0.05335	0.04499	0.04004	0.04862
0.01034	0.01067	0.011	0.01122								0.05159	0.05335	0.04499	0.04004	0.04873
0.01034	0.01067	0.011	0.01122								0.05159	0.05335	0.0451	0.04004	0.04873
0.01034	0.01067	0.01111	0.01122								0.05159	0.05335	0.0451	0.04004	0.04873
0.01034	0.01067	0.01111	0.01122								0.05159	0.05346	0.0451	0.04004	0.04884
0.01034	0.01067	0.01111	0.01122								0.05159	0.05346	0.0451	0.04004	0.04884
0.01034	0.01067	0.01111	0.01122								0.05159	0.05346	0.0451	0.04004	0.04884
0.01034	0.01067	0.01111	0.01122								0.0517	0.05346	0.0451	0.04015	0.04884
0.01034	0.01067	0.01111	0.01122								0.0517	0.05346	0.0451	0.04015	0.04884
0.01034	0.01078	0.01111	0.01122								0.0517	0.05346	0.0451	0.04015	0.04884
0.01034	0.01078	0.01111	0.01133								0.0517	0.05346	0.04521	0.04015	0.04884
0.01034	0.01078	0.01111	0.01133								0.0517	0.05357	0.04521	0.04026	0.04895
0.01034	0.01078	0.01111	0.01133								0.0517	0.05357	0.04521	0.04026	0.04895
0.01034	0.01078	0.01111	0.01133								0.0517	0.05357	0.04521	0.04026	0.04895
0.01034	0.01078	0.01111	0.01133								0.0517	0.05357	0.04521	0.04026	0.04895
0.01034	0.01078	0.01111	0.01133								0.0517	0.05357	0.04532	0.04026	0.04895
0.01034	0.01078	0.01111	0.01133								0.0517	0.05357	0.04532	0.04026	0.04895
0.01034	0.01078	0.01111	0.01133								0.05181	0.05357	0.04532	0.04026	0.04895
0.01034	0.01078	0.01111	0.01133								0.05181	0.05357	0.04532	0.04026	0.04895
0.01034	0.01078	0.01111	0.01133								0.05181	0.05368	0.04532	0.04037	0.04906
0.01034	0.01078	0.01111	0.01133								0.05181	0.05368	0.04532	0.04037	0.04906
0.01034	0.01078	0.01111	0.01133								0.05181	0.05368	0.04532	0.04037	0.04906
0.01034	0.01078	0.01111	0.01133								0.05181	0.05368	0.04532	0.04037	0.04906
0.01034	0.01078	0.01111	0.01133								0.05181	0.05379	0.04543	0.04037	0.04906
0.01034	0.01078	0.01111	0.01133								0.05181	0.05379	0.04543	0.04037	0.04906
0.01045	0.01078	0.01111	0.01133								0.05181	0.05379	0.04543	0.04037	0.04917
0.01045	0.01078	0.01111	0.01133								0.05181	0.05379	0.04543	0.04037	0.04917
0.01045	0.01078	0.01111	0.01133								0.05192	0.05379	0.04543	0.04037	0.04917
0.01045	0.01078	0.01111	0.01133								0.05192	0.0539	0.04543	0.04037	0.04917
0.01045	0.01078	0.01122	0.01133								0.05192	0.0539	0.04554	0.04048	0.04917
0.01045	0.01078	0.01122	0.01133								0.05192	0.0539	0.04554	0.04048	0.04917
0.01045	0.01078	0.01122	0.01133								0.05192	0.05401	0.04554	0.04048	0.04917
0.01045	0.01078	0.01122	0.01133								0.05192	0.05401	0.04554	0.04048	0.04928
0.01045	0.01078	0.01122	0.01133								0.05203	0.05401	0.04554	0.04048	0.04928
0.01045	0.01078	0.01122	0.01133								0.05203	0.05401	0.04554	0.04048	0.04928
0.01045	0.01078	0.01122	0.01133								0.05203	0.05401	0.04565	0.04048	0.04928
0.01045	0.01078	0.01122	0.01133								0.05203	0.05401	0.04565	0.04048	0.04928
0.01045	0.01078	0.01122	0.01133								0.05203	0.05401	0.04565	0.04048	0.04928
0.01045	0.01089	0.01122	0.01133								0.05203	0.05401	0.04576	0.04059	0.04928
0.01045	0.01089	0.01122	0.01133								0.05203	0.05401	0.04576	0.04059	0.04928
0.01045	0.01089	0.01122	0.01133								0.05203	0.05412	0.04576	0.04059	0.04928
0.01045	0.01089	0.01122	0.01133								0.05214	0.05412	0.04587	0.04059	0.04939
0.01045	0.01089	0.01122	0.01133								0.05214	0.05412	0.04587	0.04059	0.04939
0.01045	0.01089	0.01122	0.01133								0.05214	0.05434	0.04598	0.04059	0.04939
0.01045	0.01089	0.01122	0.01133								0.05214	0.05434	0.04598	0.04059	0.04939
0.01045	0.01089	0.01122	0.01133								0.05214	0.05434	0.04598	0.04059	0.04939
0.01045	0.01089	0.01122	0.01133								0.05214	0.05434	0.04598	0.04059	0.0495
0.01045	0.01089	0.01122	0.01144								0.05214	0.05434	0.04598	0.04059	0.0495
0.01045	0.01089	0.01122	0.01144								0.05214	0.05445	0.04598	0.0407	0.0495
0.01045	0.01089	0.01122	0.01144								0.05225	0.05445	0.04598	0.0407	0.04961
0.01045	0.01089	0.01122	0.01144								0.05225	0.05445	0.04598	0.0407	0.04961
0.01045	0.01089	0.01122	0.01144								0.05225	0.05445	0.04609	0.0407	0.04961
0.01045	0.01089	0.01122	0.01144								0.05225	0.05456	0.04609	0.0407	0.04961
0.01056	0.01089	0.01133	0.01144								0.05225	0.05456	0.04609	0.0407	0.04961
0.01056	0.01089	0.01133	0.01144								0.05236	0.05456	0.04609	0.0407	0.04972
0.01056	0.01089	0.01133	0.01144								0.05236	0.05456	0.04609	0.0407	0.04972
0.01056	0.01089	0.01133	0.01144								0.05236	0.05456	0.0462	0.0407	0.04972
0.01056	0.01089	0.01133	0.01144								0.05247	0.05456	0.0462	0.0407	0.04972
0.01056	0.01089	0.01133	0.01144								0.05247	0.05456	0.0462	0.04081	0.04972
0.01056	0.01089	0.01133	0.01144								0.05247	0.05456	0.0462	0.04081	0.04972
0.01056	0.01089	0.01133	0.01144								0.05247	0.05456	0.0462	0.04081	0.04972
0.01056	0.01089	0.01133	0.01144								0.05247	0.05467	0.0462	0.04081	0.04972
0.01056	0.01089	0.01133	0.01144								0.05258	0.05478	0.0462	0.04081	0.04983
0.01056	0.01089	0.01133	0.01144								0.05258	0.05478	0.04631	0.04081	0.04983
0.01056	0.01089	0.01133	0.01144								0.05258	0.05478	0.04631	0.04081	0.04983
0.01056	0.01089	0.01133	0.01144								0.05258	0.05478	0.04631	0.04081	0.04983
0.01056	0.01089	0.01133	0.01144								0.05258	0.05478	0.04631	0.04092	0.04994
0.01056	0.01089	0.01133	0.01144								0.05258	0.05478	0.04642	0.04092	0.04994
0.01056	0.01089	0.01133	0.01144								0.05258	0.05478	0.04642	0.04092	0.04994
0.01056	0.01089	0.01133	0.01144								0.05269	0.05489	0.04642	0.04092	0.04994
0.01056	0.01089	0.01133	0.01144								0.05269	0.05489	0.04642	0.04092	0.04994
0.01056	0.01089	0.01133	0.01144								0.05269	0.05489	0.04642	0.04092	0.05005
0.01056	0.01089	0.01133	0.01144								0.05269	0.055	0.04642	0.04103	0.05005
0.01056	0.01089	0.01133	0.01144								0.05269	0.055	0.04642	0.04103	0.05005
0.01056	0.01089	0.01133	0.01144								0.05269	0.055	0.04642	0.04103	0.05005
0.01056	0.011	0.01133	0.01144								0.05269	0.055	0.04642	0.04103	0.05005
0.01056	0.011	0.01133	0.01155								0.0528	0.055	0.04642	0.04103	0.05005
0.01056	0.011	0.01133	0.01155								0.0528	0.05511	0.04653	0.04103	0.05005
0.01067	0.011	0.01133	0.01155								0.05291	0.05511	0.04653	0.04103	0.05005
0.01067	0.011	0.01144	0.01155								0.05291	0.05511	0.04653	0.04114	0.05005
0.01067	0.011	0.01144	0.01155								0.05291	0.05511	0.04653	0.04114	0.05016
0.01067	0.011	0.01144	0.01155								0.05291	0.05511	0.04653	0.04114	0.05016
0.01067	0.011	0.01144	0.01155								0.05291	0.05511	0.04653	0.04114	0.05016
0.01067	0.011	0.01144	0.01155								0.05291	0.05511	0.04653	0.04114	0.05016
0.01067	0.011	0.01144	0.01155								0.05302	0.05511	0.04653	0.04114	0.05016
0.01067	0.011	0.01144	0.01155								0.05302	0.05511	0.04664	0.04125	0.05016
0.01067	0.011	0.01144	0.01155								0.05302	0.05511	0.04664	0.04125	0.05027
0.01067	0.011	0.01144	0.01155								0.05302	0.05511	0.04664	0.04125	0.05027
0.01067	0.011	0.01144	0.01155								0.05302	0.05522	0.04664	0.04125	0.05027
0.01067	0.011	0.01144	0.01155								0.05302	0.05522	0.04675	0.04125	0.05027
0.01067	0.011	0.01144	0.01155								0.05302	0.05522	0.04675	0.04125	0.05038
0.01067	0.011	0.01144	0.01155								0.05313	0.05522	0.04675	0.04136	0.05038
0.01067	0.011	0.01144	0.01155								0.05313	0.05533	0.04675	0.04136	0.05038
0.01067	0.011	0.01144	0.01155								0.05313	0.05533	0.04675	0.04136	0.05038
0.01067	0.011	0.01144	0.01155								0.05313	0.05533	0.04675	0.04147	0.05038
0.01067	0.011	0.01144	0.01155								0.05313	0.05533	0.04686	0.04147	0.05038
0.01067	0.011	0.01144	0.01155								0.05313	0.05544	0.04686	0.04147	0.05049
0.01067	0.011	0.01144	0.01155								0.05324	0.05544	0.04686	0.04147	0.05049
0.01067	0.011	0.01144	0.01155								0.05324	0.05544	0.04686	0.04147	0.05049
0.01067	0.011	0.01144	0.01155								0.05324	0.05544	0.04686	0.04147	0.05049
0.01067	0.01111	0.01144	0.01155								0.05324	0.05544	0.04686	0.04147	0.05049
0.01067	0.01111	0.01144	0.01155								0.05324	0.05544	0.04686	0.04147	0.05049
0.01067	0.01111	0.01144	0.01166								0.05335	0.05544	0.04686	0.04147	0.0506
0.01067	0.01111	0.01144	0.01166								0.05335	0.05544	0.04686	0.04147	0.0506
0.01078	0.01111	0.01144	0.01166								0.05335	0.05555	0.04686	0.04147	0.0506
0.01078	0.01111	0.01155	0.01166								0.05335	0.05555	0.04686	0.04147	0.0506
0.01078	0.01111	0.01155	0.01166								0.05335	0.05555	0.04697	0.04147	0.0506
0.01078	0.01111	0.01155	0.01166								0.05335	0.05555	0.04697	0.04147	0.0506
0.01078	0.01111	0.01155	0.01166								0.05346	0.05555	0.04697	0.04147	0.0506
0.01078	0.01111	0.01155	0.01166								0.05346	0.05555	0.04697	0.04158	0.0506
0.01078	0.01111	0.01155	0.01166								0.05346	0.05555	0.04697	0.04158	0.05071
0.01078	0.01111	0.01155	0.01166								0.05346	0.05566	0.04697	0.04158	0.05071
0.01078	0.01111	0.01155	0.01166								0.05346	0.05566	0.04697	0.04158	0.05071
0.01078	0.01111	0.01155	0.01166								0.05346	0.05566	0.04697	0.04158	0.05071
0.01078	0.01111	0.01155	0.01166								0.05346	0.05566	0.04697	0.04158	0.05071
0.01078	0.01111	0.01155	0.01166								0.05357	0.05566	0.04708	0.04169	0.05071
0.01078	0.01111	0.01155	0.01166								0.05357	0.05566	0.04708	0.04169	0.05093
0.01078	0.01111	0.01155	0.01166								0.05357	0.05566	0.04708	0.04169	0.05093
0.01078	0.01111	0.01155	0.01166								0.05357	0.05577	0.04708	0.04169	0.05093
0.01078	0.01111	0.01155	0.01166								0.05357	0.05577	0.04708	0.04169	0.05093
0.01078	0.01111	0.01155	0.01166								0.05357	0.05577	0.04708	0.04169	0.05093
0.01078	0.01111	0.01155	0.01166								0.05357	0.05577	0.04708	0.04169	0.05093
0.01078	0.01111	0.01155	0.01166								0.05368	0.05588	0.04708	0.04169	0.05093
0.01078	0.01111	0.01155	0.01166								0.05368	0.05588	0.04708	0.04169	0.05104
0.01078	0.01111	0.01155	0.01166								0.05368	0.05588	0.04719	0.0418	0.05104
0.01078	0.01111	0.01155	0.01166								0.05368	0.05588	0.04719	0.0418	0.05104
0.01078	0.01111	0.01155	0.01166								0.05368	0.05599	0.04719	0.0418	0.05104
0.01078	0.01111	0.01155	0.01166								0.05368	0.05599	0.0473	0.0418	0.05115
0.01078	0.01111	0.01155	0.01177								0.05379	0.05599	0.0473	0.0418	0.05115
0.01078	0.01111	0.01155	0.01177								0.05379	0.05599	0.0473	0.0418	0.05115
0.01078	0.01122	0.01155	0.01177								0.05379	0.05599	0.0473	0.0418	0.05115
0.01078	0.01122	0.01155	0.01177								0.05379	0.0561	0.0473	0.0418	0.05126
0.01089	0.01122	0.01155	0.01177								0.05379	0.0561	0.0473	0.04191	0.05126
0.01089	0.01122	0.01155	0.01177								0.05379	0.0561	0.0473	0.04191	0.05126
0.01089	0.01122	0.01155	0.01177								0.05379	0.0561	0.0473	0.04191	0.05126
0.01089	0.01122	0.01155	0.01177								0.0539	0.05621	0.04741	0.04191	0.05126
0.01089	0.01122	0.01155	0.01177								0.0539	0.05621	0.04741	0.04191	0.05126
0.01089	0.01122	0.01155	0.01177								0.0539	0.05621	0.04741	0.04191	0.05126
0.01089	0.01122	0.01166	0.01177								0.0539	0.05621	0.04741	0.04202	0.05126
0.01089	0.01122	0.01166	0.01177								0.0539	0.05621	0.04741	0.04202	0.05137
0.01089	0.01122	0.01166	0.01177								0.0539	0.05621	0.04752	0.04202	0.05137
0.01089	0.01122	0.01166	0.01177								0.0539	0.05621	0.04752	0.04202	0.05137
0.01089	0.01122	0.01166	0.01177								0.05401	0.05621	0.04752	0.04202	0.05137
0.01089	0.01122	0.01166	0.01177								0.05401	0.05632	0.04752	0.04213	0.05137
0.01089	0.01122	0.01166	0.01177								0.05401	0.05632	0.04752	0.04213	0.05137
0.01089	0.01122	0.01166	0.01177								0.05401	0.05632	0.04752	0.04213	0.05137
0.01089	0.01122	0.01166	0.01177								0.05401	0.05643	0.04763	0.04213	0.05137
0.01089	0.01122	0.01166	0.01177								0.05412	0.05643	0.04763	0.04213	0.05137
0.01089	0.01122	0.01166	0.01177								0.05412	0.05643	0.04763	0.04224	0.05148
0.01089	0.01122	0.01166	0.01177								0.05412	0.05643	0.04763	0.04224	0.05148
0.01089	0.01122	0.01166	0.01177								0.05412	0.05654	0.04763	0.04224	0.05148
0.01089	0.01122	0.01166	0.01177								0.05412	0.05654	0.04774	0.04224	0.05148
0.01089	0.01122	0.01166	0.01177								0.05412	0.05654	0.04774	0.04224	0.05148
0.01089	0.01122	0.01166	0.01177								0.05412	0.05654	0.04774	0.04224	0.05148
0.01089	0.01122	0.01166	0.01177								0.05412	0.05654	0.04785	0.04224	0.05148
0.01089	0.01122	0.01166	0.01177								0.05423	0.05665	0.04785	0.04224	0.05148
0.01089	0.01122	0.01166	0.01188								0.05423	0.05665	0.04785	0.04224	0.05159
0.01089	0.01122	0.01166	0.01188								0.05423	0.05665	0.04785	0.04235	0.05159
0.01089	0.01122	0.01166	0.01188								0.05434	0.05665	0.04785	0.04235	0.05159
0.01089	0.01122	0.01166	0.01188								0.05434	0.05665	0.04785	0.04235	0.05159
0.01089	0.01122	0.01166	0.01188								0.05434	0.05665	0.04785	0.04235	0.05159
0.011	0.01122	0.01166	0.01188								0.05434	0.05676	0.04785	0.04235	0.05159
0.011	0.01122	0.01166	0.01188								0.05434	0.05676	0.04785	0.04235	0.05159
0.011	0.01122	0.01166	0.01188								0.05445	0.05676	0.04785	0.04235	0.05159
0.011	0.01133	0.01166	0.01188								0.05445	0.05676	0.04785	0.04246	0.05159
0.011	0.01133	0.01166	0.01188								0.05445	0.05676	0.04785	0.04246	0.0517
0.011	0.01133	0.01177	0.01188								0.05445	0.05687	0.04785	0.04246	0.0517
0.011	0.01133	0.01177	0.01188								0.05445	0.05687	0.04796	0.04246	0.0517
0.011	0.01133	0.01177	0.01188								0.05456	0.05687	0.04796	0.04246	0.0517
0.011	0.01133	0.01177	0.01188								0.05456	0.05687	0.04796	0.04246	0.0517
0.011	0.01133	0.01177	0.01188								0.05456	0.05698	0.04796	0.04246	0.0517
0.011	0.01133	0.01177	0.01188								0.05456	0.05698	0.04796	0.04246	0.0517
0.011	0.01133	0.01177	0.01188								0.05456	0.05698	0.04796	0.04246	0.0517
0.011	0.01133	0.01177	0.01188								0.05467	0.05709	0.04796	0.04257	0.05181
0.011	0.01133	0.01177	0.01188								0.05467	0.05709	0.04796	0.04257	0.05181
0.011	0.01133	0.01177	0.01188								0.05467	0.05709	0.04796	0.04268	0.05181
0.011	0.01133	0.01177	0.01188								0.05467	0.05709	0.04807	0.04268	0.05181
0.011	0.01133	0.01177	0.01188								0.05478	0.05709	0.04807	0.04268	0.05181
0.011	0.01133	0.01177	0.01188								0.05478	0.05709	0.04807	0.04268	0.05192
0.011	0.01133	0.01177	0.01188								0.05478	0.05709	0.04807	0.04268	0.05192
0.011	0.01133	0.01177	0.01188								0.05478	0.0572	0.04807	0.04268	0.05192
0.011	0.01133	0.01177	0.01188								0.05478	0.0572	0.04807	0.04279	0.05203
0.011	0.01133	0.01177	0.01188								0.05478	0.0572	0.04807	0.04279	0.05203
0.011	0.01133	0.01177	0.01188								0.05478	0.0572	0.04807	0.04279	0.05203
0.011	0.01133	0.01177	0.01188								0.05478	0.0572	0.04807	0.04279	0.05203
0.011	0.01133	0.01177	0.01188								0.05478	0.0572	0.04818	0.04279	0.05203
0.011	0.01133	0.01177	0.01188								0.05478	0.05731	0.04818	0.04279	0.05203
0.011	0.01133	0.01177	0.01199								0.05489	0.05731	0.04818	0.04279	0.05203
0.011	0.01133	0.01177	0.01199								0.05489	0.05731	0.04818	0.04279	0.05203
0.011	0.01133	0.01177	0.01199								0.05489	0.05742	0.04818	0.04279	0.05214
0.011	0.01133	0.01177	0.01199								0.055	0.05742	0.04818	0.04279	0.05214
0.011	0.01133	0.01177	0.01199								0.055	0.05742	0.04818	0.04279	0.05214
0.01111	0.01133	0.01188	0.01199								0.055	0.05742	0.04818	0.0429	0.05214
0.01111	0.01144	0.01188	0.01199								0.055	0.05753	0.04818	0.0429	0.05214
0.01111	0.01144	0.01188	0.01199								0.055	0.05753	0.04818	0.0429	0.05214
0.01111	0.01144	0.01188	0.01199								0.05511	0.05753	0.04829	0.04301	0.05225
0.01111	0.01144	0.01188	0.01199								0.05511	0.05753	0.04829	0.04301	0.05225
0.01111	0.01144	0.01188	0.01199								0.05511	0.05753	0.04829	0.04301	0.05225
0.01111	0.01144	0.01188	0.01199								0.05511	0.05753	0.04829	0.04301	0.05225
0.01111	0.01144	0.01188	0.01199								0.05511	0.05753	0.04829	0.04301	0.05236
0.01111	0.01144	0.01188	0.01199								0.05511	0.05753	0.04829	0.04301	0.05236
0.01111	0.01144	0.01188	0.01199								0.05511	0.05764	0.04829	0.04301	0.05236
0.01111	0.01144	0.01188	0.01199								0.05511	0.05764	0.0484	0.04301	0.05247
0.01111	0.01144	0.01188	0.01199								0.05511	0.05764	0.0484	0.04301	0.05247
0.01111	0.01144	0.01188	0.01199								0.05511	0.05764	0.0484	0.04312	0.05247
0.01111	0.01144	0.01188	0.01199								0.05522	0.05764	0.0484	0.04312	0.05258
0.01111	0.01144	0.01188	0.01199								0.05522	0.05775	0.0484	0.04323	0.05258
0.01111	0.01144	0.01188	0.01199								0.05522	0.05775	0.04851	0.04323	0.05258
0.01111	0.01144	0.01188	0.01199								0.05522	0.05775	0.04851	0.04323	0.05258
0.01111	0.01144	0.01188	0.01199								0.05533	0.05775	0.04851	0.04323	0.05258
0.01111	0.01144	0.01188	0.01199								0.05533	0.05775	0.04851	0.04323	0.05269
0.01111	0.01144	0.01188	0.01199								0.05533	0.05775	0.04851	0.04323	0.05269
0.01111	0.01144	0.01188	0.01199								0.05533	0.05775	0.04851	0.04323	0.05269
0.01111	0.01144	0.01188	0.01199								0.05544	0.05786	0.04851	0.04334	0.05269
0.01111	0.01144	0.01188	0.01199								0.05544	0.05786	0.04851	0.04334	0.05269
0.01111	0.01144	0.01188	0.01199								0.05544	0.05786	0.04851	0.04334	0.05269
0.01111	0.01144	0.01188	0.01199								0.05544	0.05786	0.04862	0.04334	0.05269
0.01111	0.01144	0.01188	0.01199								0.05544	0.05797	0.04862	0.04334	0.05269
0.01111	0.01155	0.01188	0.0121								0.05544	0.05797	0.04862	0.04334	0.0528
0.01111	0.01155	0.01199	0.0121								0.05555	0.05808	0.04862	0.04334	0.0528
0.01111	0.01155	0.01199	0.0121								0.05555	0.05808	0.04873	0.04334	0.0528
0.01111	0.01155	0.01199	0.0121								0.05555	0.05808	0.04873	0.04334	0.0528
0.01111	0.01155	0.01199	0.0121								0.05555	0.05808	0.04873	0.04345	0.0528
0.01111	0.01155	0.01199	0.0121								0.05555	0.05808	0.04873	0.04345	0.0528
0.01111	0.01155	0.01199	0.0121								0.05555	0.05808	0.04873	0.04345	0.0528
0.01111	0.01155	0.01199	0.0121								0.05555	0.05819	0.04884	0.04345	0.05291
0.01111	0.01155	0.01199	0.0121								0.05555	0.05819	0.04884	0.04345	0.05291
0.01111	0.01155	0.01199	0.0121								0.05555	0.05819	0.04884	0.04345	0.05291
0.01122	0.01155	0.01199	0.0121								0.05555	0.05819	0.04884	0.04345	0.05291
0.01122	0.01155	0.01199	0.0121								0.05566	0.05819	0.04884	0.04356	0.05291
0.01122	0.01155	0.01199	0.0121								0.05566	0.0583	0.04884	0.04356	0.05302
0.01122	0.01155	0.01199	0.0121								0.05566	0.0583	0.04884	0.04356	0.05302
0.01122	0.01155	0.01199	0.0121								0.05566	0.0583	0.04895	0.04356	0.05302
0.01122	0.01155	0.01199	0.0121								0.05566	0.0583	0.04895	0.04356	0.05302
0.01122	0.01155	0.01199	0.0121								0.05566	0.0583	0.04895	0.04356	0.05302
0.01122	0.01155	0.01199	0.0121								0.05566	0.05841	0.04895	0.04367	0.05302
0.01122	0.01155	0.01199	0.0121								0.05566	0.05841	0.04906	0.04367	0.05313
0.01122	0.01155	0.01199	0.0121								0.05566	0.05841	0.04906	0.04367	0.05313
0.01122	0.01155	0.01199	0.0121								0.05566	0.05841	0.04906	0.04367	0.05313
0.01122	0.01155	0.01199	0.0121								0.05577	0.05852	0.04906	0.04367	0.05324
0.01122	0.01155	0.01199	0.0121								0.05577	0.05852	0.04906	0.04367	0.05324
0.01122	0.01155	0.01199	0.0121								0.05577	0.05852	0.04906	0.04367	0.05324
0.01122	0.01155	0.01199	0.0121								0.05577	0.05852	0.04917	0.04367	0.05324
0.01122	0.01155	0.0121	0.0121								0.05577	0.05852	0.04917	0.04367	0.05324
0.01122	0.01155	0.0121	0.0121								0.05577	0.05852	0.04917	0.04367	0.05324
0.01122	0.01155	0.0121	0.0121								0.05577	0.05852	0.04917	0.04378	0.05324
0.01122	0.01155	0.0121	0.0121								0.05577	0.05863	0.04917	0.04378	0.05324
0.01122	0.01155	0.0121	0.0121								0.05577	0.05863	0.04917	0.04389	0.05335
0.01122	0.01155	0.0121	0.0121								0.05588	0.05863	0.04917	0.04389	0.05335
0.01122	0.01155	0.0121	0.0121								0.05588	0.05874	0.04928	0.04389	0.05335
0.01122	0.01155	0.0121	0.0121								0.05588	0.05874	0.04928	0.044	0.05335
0.01122	0.01155	0.0121	0.01221								0.05588	0.05874	0.04928	0.044	0.05335
0.01122	0.01155	0.0121	0.01221								0.05588	0.05874	0.04928	0.044	0.05335
0.01122	0.01155	0.0121	0.01221								0.05599	0.05885	0.04928	0.044	0.05346
0.01122	0.01155	0.0121	0.01221								0.05599	0.05885	0.04928	0.044	0.05346
0.01122	0.01155	0.0121	0.01221								0.05599	0.05885	0.04939	0.044	0.05346
0.01122	0.01155	0.0121	0.01221								0.05599	0.05885	0.04939	0.044	0.05357
0.01122	0.01155	0.0121	0.01221								0.05599	0.05896	0.04939	0.044	0.05357
0.01122	0.01166	0.0121	0.01221								0.0561	0.05896	0.04939	0.044	0.05357
0.01122	0.01166	0.0121	0.01221								0.0561	0.05896	0.04939	0.04411	0.05357
0.01122	0.01166	0.0121	0.01221								0.0561	0.05907	0.04939	0.04411	0.05368
0.01122	0.01166	0.0121	0.01221								0.0561	0.05907	0.04939	0.04411	0.05368
0.01122	0.01166	0.0121	0.01221								0.0561	0.05907	0.04939	0.04411	0.05368
0.01122	0.01166	0.0121	0.01221								0.0561	0.05918	0.0495	0.04411	0.05368
0.01122	0.01166	0.0121	0.01221								0.05621	0.05918	0.0495	0.04411	0.05368
0.01122	0.01166	0.0121	0.01221								0.05621	0.05918	0.0495	0.04411	0.05379
0.01122	0.01166	0.0121	0.01221								0.05621	0.05929	0.04961	0.04411	0.05379
0.01122	0.01166	0.0121	0.01221								0.05621	0.05929	0.04961	0.04411	0.05379
0.01122	0.01166	0.0121	0.01221								0.05621	0.05929	0.04961	0.04411	0.05379
0.01122	0.01166	0.0121	0.01221								0.05621	0.05929	0.04961	0.04411	0.05379
0.01122	0.01166	0.0121	0.01221								0.05621	0.05929	0.04961	0.04411	0.05379
0.01122	0.01166	0.0121	0.01221								0.05621	0.0594	0.04961	0.04411	0.05379
0.01122	0.01166	0.0121	0.01221								0.05632	0.0594	0.04972	0.04411	0.0539
0.01122	0.01166	0.0121	0.01221								0.05632	0.05951	0.04972	0.04411	0.0539
0.01133	0.01166	0.0121	0.01221								0.05632	0.05951	0.04972	0.04422	0.0539
0.01133	0.01166	0.0121	0.01221								0.05643	0.05951	0.04972	0.04422	0.0539
0.01133	0.01166	0.0121	0.01221								0.05643	0.05951	0.04972	0.04422	0.0539
0.01133	0.01166	0.0121	0.01221								0.05654	0.05951	0.04972	0.04422	0.0539
0.01133	0.01166	0.0121	0.01221								0.05654	0.05951	0.04972	0.04422	0.0539
0.01133	0.01177	0.0121	0.01221								0.05654	0.05962	0.04972	0.04422	0.0539
0.01133	0.01177	0.0121	0.01221								0.05654	0.05962	0.04983	0.04433	0.0539
0.01133	0.01177	0.0121	0.01221								0.05654	0.05962	0.04983	0.04433	0.0539
0.01133	0.01177	0.0121	0.01221								0.05654	0.05962	0.04983	0.04433	0.05401
0.01133	0.01177	0.01221	0.01232								0.05665	0.05962	0.04983	0.04433	0.05401
0.01133	0.01177	0.01221	0.01232								0.05665	0.05962	0.04983	0.04433	0.05401
0.01133	0.01177	0.01221	0.01232								0.05676	0.05962	0.04983	0.04433	0.05412
0.01133	0.01177	0.01221	0.01232								0.05676	0.05973	0.04994	0.04433	0.05412
0.01133	0.01177	0.01221	0.01232								0.05676	0.05973	0.04994	0.04433	0.05412
0.01133	0.01177	0.01221	0.01232								0.05676	0.05973	0.04994	0.04433	0.05423
0.01133	0.01177	0.01221	0.01232								0.05676	0.05973	0.04994	0.04444	0.05423
0.01133	0.01177	0.01221	0.01232								0.05676	0.05973	0.04994	0.04444	0.05423
0.01133	0.01177	0.01221	0.01232								0.05676	0.05973	0.05005	0.04444	0.05423
0.01133	0.01177	0.01221	0.01232								0.05687	0.05984	0.05005	0.04444	0.05423
0.01133	0.01177	0.01221	0.01232								0.05687	0.05984	0.05005	0.04444	0.05423
0.01133	0.01177	0.01221	0.01232								0.05687	0.05984	0.05005	0.04444	0.05423
0.01133	0.01177	0.01221	0.01232								0.05687	0.05984	0.05005	0.04455	0.05423
0.01133	0.01177	0.01221	0.01232								0.05687	0.05984	0.05005	0.04455	0.05434
0.01133	0.01177	0.01221	0.01232								0.05687	0.05984	0.05016	0.04455	0.05434
0.01133	0.01177	0.01221	0.01232								0.05687	0.05984	0.05016	0.04455	0.05434
0.01133	0.01177	0.01221	0.01232								0.05698	0.05984	0.05016	0.04455	0.05434
0.01133	0.01177	0.01221	0.01232								0.05698	0.05995	0.05016	0.04455	0.05434
0.01133	0.01177	0.01221	0.01232								0.05698	0.05995	0.05027	0.04466	0.05434
0.01133	0.01177	0.01221	0.01232								0.05709	0.05995	0.05027	0.04466	0.05445
0.01133	0.01177	0.01221	0.01232								0.05709	0.05995	0.05027	0.04466	0.05445
0.01133	0.01188	0.01221	0.01232								0.05709	0.05995	0.05027	0.04466	0.05445
0.01144	0.01188	0.01221	0.01232								0.05709	0.06006	0.05038	0.04466	0.05445
0.01144	0.01188	0.01221	0.01232								0.05709	0.06006	0.05038	0.04466	0.05456
0.01144	0.01188	0.01232	0.01232								0.0572	0.06006	0.05038	0.04466	0.05456
0.01144	0.01188	0.01232	0.01232								0.0572	0.06006	0.05038	0.04466	0.05467
0.01144	0.01188	0.01232	0.01232								0.0572	0.06017	0.05038	0.04477	0.05467
0.01144	0.01188	0.01232	0.01232								0.0572	0.06028	0.05038	0.04477	0.05467
0.01144	0.01188	0.01232	0.01232								0.0572	0.06028	0.05038	0.04488	0.05467
0.01144	0.01188	0.01232	0.01232								0.05731	0.06028	0.05038	0.04488	0.05467
0.01144	0.01188	0.01232	0.01243								0.05731	0.06028	0.05038	0.04488	0.05467
0.01144	0.01188	0.01232	0.01243								0.05731	0.06028	0.05038	0.04488	0.05467
0.01144	0.01188	0.01232	0.01243								0.05731	0.06028	0.05038	0.04488	0.05467
0.01144	0.01188	0.01232	0.01243								0.05731	0.06028	0.05049	0.04488	0.05478
0.01144	0.01188	0.01232	0.01243								0.05731	0.06039	0.05049	0.04488	0.05478
0.01144	0.01188	0.01232	0.01243								0.05742	0.06039	0.05049	0.04488	0.05478
0.01144	0.01188	0.01232	0.01243								0.05742	0.06039	0.05049	0.04488	0.05478
0.01144	0.01188	0.01232	0.01243								0.05742	0.0605	0.05049	0.04499	0.05489
0.01144	0.01188	0.01232	0.01243								0.05742	0.0605	0.05049	0.04499	0.05489
0.01144	0.01188	0.01232	0.01243								0.05753	0.0605	0.0506	0.04499	0.05489
0.01144	0.01188	0.01232	0.01243								0.05753	0.0605	0.0506	0.04499	0.05489
0.01144	0.01188	0.01232	0.01243								0.05753	0.0605	0.0506	0.04499	0.05489
0.01144	0.01188	0.01232	0.01243								0.05764	0.0605	0.0506	0.04499	0.055
0.01144	0.01188	0.01232	0.01243								0.05764	0.06061	0.0506	0.0451	0.055
0.01144	0.01188	0.01232	0.01243								0.05764	0.06061	0.0506	0.0451	0.055
0.01144	0.01188	0.01232	0.01243								0.05764	0.06061	0.0506	0.0451	0.055
0.01144	0.01188	0.01232	0.01243								0.05764	0.06072	0.0506	0.0451	0.055
0.01144	0.01188	0.01232	0.01243								0.05764	0.06072	0.0506	0.04521	0.055
0.01144	0.01188	0.01232	0.01243								0.05775	0.06072	0.05071	0.04521	0.055
0.01144	0.01188	0.01232	0.01243								0.05775	0.06072	0.05071	0.04521	0.05511
0.01144	0.01188	0.01232	0.01243								0.05775	0.06072	0.05071	0.04532	0.05511
0.01144	0.01188	0.01232	0.01243								0.05775	0.06083	0.05071	0.04532	0.05511
0.01144	0.01188	0.01232	0.01243								0.05775	0.06083	0.05071	0.04532	0.05511
0.01144	0.01199	0.01232	0.01243								0.05775	0.06083	0.05071	0.04532	0.05511
0.01155	0.01199	0.01232	0.01243								0.05786	0.06083	0.05071	0.04532	0.05511
0.01155	0.01199	0.01243	0.01243								0.05786	0.06083	0.05071	0.04532	0.05522
0.01155	0.01199	0.01243	0.01243								0.05786	0.06083	0.05071	0.04532	0.05522
0.01155	0.01199	0.01243	0.01243								0.05786	0.06083	0.05071	0.04532	0.05522
0.01155	0.01199	0.01243	0.01243								0.05786	0.06083	0.05071	0.04543	0.05522
0.01155	0.01199	0.01243	0.01243								0.05786	0.06083	0.05071	0.04543	0.05522
0.01155	0.01199	0.01243	0.01243								0.05786	0.06094	0.05082	0.04543	0.05522
0.01155	0.01199	0.01243	0.01243								0.05786	0.06094	0.05082	0.04543	0.05522
0.01155	0.01199	0.01243	0.01243								0.05797	0.06094	0.05082	0.04543	0.05522
0.01155	0.01199	0.01243	0.01243								0.05797	0.06094	0.05082	0.04543	0.05522
0.01155	0.01199	0.01243	0.01243								0.05797	0.06094	0.05093	0.04543	0.05522
0.01155	0.01199	0.01243	0.01254								0.05797	0.06094	0.05093	0.04543	0.05533
0.01155	0.01199	0.01243	0.01254								0.05797	0.06105	0.05093	0.04543	0.05533
0.01155	0.01199	0.01243	0.01254								0.05808	0.06105	0.05093	0.04554	0.05533
0.01155	0.01199	0.01243	0.01254								0.05808	0.06105	0.05093	0.04554	0.05544
0.01155	0.01199	0.01243	0.01254								0.05808	0.06105	0.05093	0.04554	0.05544
0.01155	0.0121	0.01243	0.01254								0.05808	0.06105	0.05093	0.04554	0.05544
0.01155	0.0121	0.01243	0.01254								0.05808	0.06105	0.05104	0.04554	0.05544
0.01155	0.0121	0.01243	0.01254								0.05808	0.06105	0.05104	0.04554	0.05544
0.01155	0.0121	0.01243	0.01254								0.05808	0.06105	0.05104	0.04554	0.05555
0.01155	0.0121	0.01243	0.01254								0.05819	0.06116	0.05104	0.04565	0.05555
0.01155	0.0121	0.01243	0.01254								0.05819	0.06116	0.05104	0.04565	0.05555
0.01155	0.0121	0.01243	0.01254								0.05819	0.06116	0.05104	0.04565	0.05555
0.01155	0.0121	0.01243	0.01254								0.05819	0.06116	0.05115	0.04565	0.05555
0.01155	0.0121	0.01243	0.01254								0.05819	0.06127	0.05115	0.04565	0.05555
0.01155	0.0121	0.01243	0.01254								0.05819	0.06127	0.05115	0.04565	0.05555
0.01155	0.0121	0.01243	0.01254								0.05819	0.06127	0.05115	0.04565	0.05555
0.01155	0.0121	0.01243	0.01254								0.0583	0.06138	0.05115	0.04565	0.05566
0.01155	0.0121	0.01243	0.01254								0.0583	0.06138	0.05115	0.04576	0.05566
0.01155	0.0121	0.01243	0.01254								0.0583	0.06138	0.05126	0.04576	0.05566
0.01155	0.0121	0.01243	0.01254								0.0583	0.06138	0.05126	0.04576	0.05566
0.01155	0.0121	0.01243	0.01254								0.0583	0.06138	0.05126	0.04576	0.05566
0.01155	0.0121	0.01243	0.01254								0.0583	0.06138	0.05126	0.04576	0.05566
0.01155	0.0121	0.01243	0.01254								0.0583	0.06149	0.05126	0.04587	0.05566
0.01155	0.0121	0.01254	0.01254								0.0583	0.06149	0.05126	0.04587	0.05577
0.01155	0.0121	0.01254	0.01254								0.05841	0.06149	0.05126	0.04587	0.05577
0.01155	0.0121	0.01254	0.01254								0.05841	0.06149	0.05126	0.04598	0.05577
0.01155	0.0121	0.01254	0.01254								0.05841	0.06149	0.05126	0.04598	0.05577
0.01155	0.0121	0.01254	0.01254								0.05841	0.06149	0.05126	0.04598	0.05588
0.01155	0.0121	0.01254	0.01254								0.05841	0.06149	0.05126	0.04598	0.05588
0.01166	0.0121	0.01254	0.01254								0.05841	0.06149	0.05137	0.04598	0.05588
0.01166	0.0121	0.01254	0.01254								0.05852	0.0616	0.05137	0.04609	0.05588
0.01166	0.0121	0.01254	0.01254								0.05852	0.0616	0.05137	0.04609	0.05588
0.01166	0.0121	0.01254	0.01254								0.05852	0.0616	0.05137	0.04609	0.05588
0.01166	0.0121	0.01254	0.01254								0.05852	0.0616	0.05137	0.04609	0.05599
0.01166	0.0121	0.01254	0.01254								0.05852	0.0616	0.05137	0.04609	0.05599
0.01166	0.0121	0.01254	0.01254								0.05852	0.0616	0.05137	0.04609	0.05599
0.01166	0.0121	0.01254	0.01265								0.05863	0.0616	0.05137	0.04609	0.05599
0.01166	0.0121	0.01254	0.01265								0.05863	0.0616	0.05137	0.04609	0.0561
0.01166	0.01221	0.01254	0.01265								0.05863	0.06171	0.05148	0.0462	0.0561
0.01166	0.01221	0.01254	0.01265								0.05863	0.06182	0.05148	0.0462	0.0561
0.01166	0.01221	0.01254	0.01265								0.05863	0.06182	0.05148	0.0462	0.0561
0.01166	0.01221	0.01254	0.01265								0.05863	0.06182	0.05148	0.0462	0.0561
0.01166	0.01221	0.01254	0.01265								0.05863	0.06182	0.05148	0.0462	0.0561
0.01166	0.01221	0.01254	0.01265								0.05863	0.06182	0.05159	0.0462	0.0561
0.01166	0.01221	0.01254	0.01265								0.05863	0.06193	0.05159	0.0462	0.0561
0.01166	0.01221	0.01254	0.01265								0.05863	0.06193	0.05159	0.04631	0.0561
0.01166	0.01221	0.01254	0.01265								0.05874	0.06193	0.05159	0.04631	0.0561
0.01166	0.01221	0.01254	0.01265								0.05874	0.06193	0.05159	0.04631	0.0561
0.01166	0.01221	0.01254	0.01265								0.05874	0.06193	0.05159	0.04631	0.0561
0.01166	0.01221	0.01254	0.01265								0.05874	0.06193	0.05159	0.04631	0.0561
0.01166	0.01221	0.01254	0.01265								0.05874	0.06204	0.05159	0.04631	0.0561
0.01166	0.01221	0.01254	0.01265								0.05874	0.06204	0.05159	0.04631	0.0561
0.01166	0.01221	0.01254	0.01265								0.05874	0.06204	0.05159	0.04631	0.05621
0.01166	0.01221	0.01265	0.01265								0.05874	0.06204	0.0517	0.04631	0.05621
0.01166	0.01221	0.01265	0.01265								0.05874	0.06204	0.0517	0.04631	0.05621
0.01166	0.01221	0.01265	0.01265								0.05874	0.06204	0.0517	0.04642	0.05621
0.01166	0.01221	0.01265	0.01265								0.05874	0.06204	0.0517	0.04642	0.05621
0.01166	0.01221	0.01265	0.01265								0.05874	0.06204	0.05181	0.04642	0.05621
0.01166	0.01221	0.01265	0.01265								0.05874	0.06215	0.05181	0.04642	0.05621
0.01166	0.01221	0.01265	0.01265								0.05885	0.06215	0.05181	0.04642	0.05632
0.01166	0.01221	0.01265	0.01265								0.05885	0.06226	0.05181	0.04642	0.05632
0.01166	0.01221	0.01265	0.01265								0.05885	0.06226	0.05181	0.04653	0.05632
0.01166	0.01221	0.01265	0.01265								0.05885	0.06237	0.05181	0.04653	0.05632
0.01166	0.01221	0.01265	0.01265								0.05885	0.06237	0.05192	0.04653	0.05632
0.01166	0.01221	0.01265	0.01265								0.05885	0.06237	0.05192	0.04653	0.05632
0.01177	0.01221	0.01265	0.01265								0.05896	0.06237	0.05192	0.04653	0.05632
0.01177	0.01221	0.01265	0.01265								0.05896	0.06237	0.05192	0.04653	0.05632
0.01177	0.01221	0.01265	0.01276								0.05896	0.06237	0.05192	0.04664	0.05643
0.01177	0.01221	0.01265	0.01276								0.05907	0.06237	0.05192	0.04664	0.05643
0.01177	0.01221	0.01265	0.01276								0.05907	0.06237	0.05192	0.04664	0.05643
0.01177	0.01221	0.01265	0.01276								0.05907	0.06237	0.05203	0.04664	0.05643
0.01177	0.01221	0.01265	0.01276								0.05907	0.06237	0.05203	0.04664	0.05665
0.01177	0.01221	0.01265	0.01276								0.05907	0.06237	0.05203	0.04664	0.05665
0.01177	0.01221	0.01265	0.01276								0.05907	0.06248	0.05203	0.04664	0.05665
0.01177	0.01232	0.01265	0.01276								0.05907	0.06248	0.05203	0.04664	0.05665
0.01177	0.01232	0.01265	0.01276								0.05907	0.06248	0.05203	0.04664	0.05665
0.01177	0.01232	0.01265	0.01276								0.05907	0.06248	0.05203	0.04664	0.05665
0.01177	0.01232	0.01265	0.01276								0.05918	0.06248	0.05203	0.04664	0.05676
0.01177	0.01232	0.01265	0.01276								0.05918	0.06248	0.05203	0.04675	0.05676
0.01177	0.01232	0.01265	0.01276								0.05918	0.06248	0.05214	0.04675	0.05676
0.01177	0.01232	0.01265	0.01276								0.05918	0.06248	0.05214	0.04675	0.05676
0.01177	0.01232	0.01265	0.01276								0.05918	0.06248	0.05214	0.04675	0.05676
0.01177	0.01232	0.01265	0.01276								0.05929	0.06259	0.05214	0.04686	0.05676
0.01177	0.01232	0.01265	0.01276								0.05929	0.06259	0.05214	0.04686	0.05676
0.01177	0.01232	0.01265	0.01276								0.05929	0.06259	0.05214	0.04686	0.05676
0.01177	0.01232	0.01265	0.01276								0.05929	0.06259	0.05214	0.04686	0.05687
0.01177	0.01232	0.01265	0.01276								0.05929	0.0627	0.05225	0.04686	0.05687
0.01177	0.01232	0.01276	0.01276								0.05929	0.0627	0.05225	0.04686	0.05687
0.01177	0.01232	0.01276	0.01276								0.05929	0.0627	0.05225	0.04686	0.05687
0.01177	0.01232	0.01276	0.01276								0.05929	0.0627	0.05236	0.04686	0.05687
0.01177	0.01232	0.01276	0.01276								0.05929	0.0627	0.05236	0.04697	0.05687
0.01177	0.01232	0.01276	0.01276								0.05929	0.0627	0.05236	0.04697	0.05687
0.01177	0.01232	0.01276	0.01276								0.0594	0.0627	0.05236	0.04697	0.05687
0.01177	0.01232	0.01276	0.01276								0.0594	0.0627	0.05236	0.04697	0.05698
0.01177	0.01232	0.01276	0.01276								0.0594	0.0627	0.05247	0.04697	0.05698
0.01188	0.01232	0.01276	0.01276								0.0594	0.06281	0.05247	0.04697	0.05698
0.01188	0.01232	0.01276	0.01276								0.0594	0.06281	0.05247	0.04697	0.05698
0.01188	0.01232	0.01276	0.01287								0.0594	0.06292	0.05247	0.04697	0.05698
0.01188	0.01232	0.01276	0.01287								0.0594	0.06292	0.05247	0.04697	0.05709
0.01188	0.01232	0.01276	0.01287								0.0594	0.06292	0.05247	0.04697	0.05709
0.01188	0.01232	0.01276	0.01287								0.05951	0.06292	0.05247	0.04697	0.05709
0.01188	0.01232	0.01276	0.01287								0.05951	0.06292	0.05247	0.04708	0.05709
0.01188	0.01232	0.01276	0.01287								0.05951	0.06292	0.05247	0.04708	0.05709
0.01188	0.01232	0.01276	0.01287								0.05951	0.06303	0.05258	0.04708	0.05709
0.01188	0.01232	0.01276	0.01287								0.05951	0.06303	0.05258	0.04708	0.05709
0.01188	0.01232	0.01276	0.01287								0.05951	0.06303	0.05258	0.04708	0.05709
0.01188	0.01232	0.01276	0.01287								0.05962	0.06303	0.05258	0.04708	0.05709
0.01188	0.01232	0.01276	0.01287								0.05962	0.06303	0.05269	0.04708	0.05709
0.01188	0.01232	0.01276	0.01287								0.05962	0.06303	0.05269	0.04708	0.05709
0.01188	0.01232	0.01276	0.01287								0.05962	0.06303	0.05269	0.04708	0.0572
0.01188	0.01232	0.01276	0.01287								0.05962	0.06303	0.05269	0.04708	0.0572
0.01188	0.01232	0.01276	0.01287								0.05973	0.06314	0.0528	0.04708	0.0572
0.01188	0.01232	0.01276	0.01287								0.05973	0.06314	0.0528	0.04708	0.0572
0.01188	0.01243	0.01276	0.01287								0.05973	0.06314	0.0528	0.04708	0.0572
0.01188	0.01243	0.01276	0.01287								0.05973	0.06314	0.0528	0.04708	0.0572
0.01188	0.01243	0.01276	0.01287								0.05973	0.06314	0.0528	0.04719	0.0572
0.01188	0.01243	0.01276	0.01287								0.05973	0.06314	0.0528	0.04719	0.0572
0.01188	0.01243	0.01276	0.01287								0.05984	0.06314	0.0528	0.04719	0.0572
0.01188	0.01243	0.01276	0.01287								0.05984	0.06314	0.0528	0.04719	0.0572
0.01188	0.01243	0.01287	0.01287								0.05984	0.06314	0.0528	0.04719	0.0572
0.01188	0.01243	0.01287	0.01287								0.05984	0.06314	0.0528	0.04719	0.05731
0.01188	0.01243	0.01287	0.01287								0.05995	0.06314	0.0528	0.04719	0.05731
0.01188	0.01243	0.01287	0.01287								0.05995	0.06314	0.0528	0.04719	0.05731
0.01188	0.01243	0.01287	0.01287								0.05995	0.06325	0.05291	0.04719	0.05731
0.01188	0.01243	0.01287	0.01287								0.05995	0.06336	0.05291	0.0473	0.05731
0.01188	0.01243	0.01287	0.01287								0.05995	0.06336	0.05291	0.0473	0.05731
0.01188	0.01243	0.01287	0.01287								0.05995	0.06336	0.05291	0.0473	0.05742
0.01188	0.01243	0.01287	0.01298								0.06006	0.06336	0.05291	0.0473	0.05742
0.01188	0.01243	0.01287	0.01298								0.06006	0.06336	0.05291	0.0473	0.05742
0.01188	0.01243	0.01287	0.01298								0.06006	0.06336	0.05291	0.0473	0.05742
0.01188	0.01243	0.01287	0.01298								0.06006	0.06336	0.05302	0.0473	0.05742
0.01188	0.01243	0.01287	0.01298								0.06017	0.06336	0.05302	0.0473	0.05742
0.01188	0.01243	0.01287	0.01298								0.06017	0.06347	0.05302	0.0473	0.05742
0.01188	0.01243	0.01287	0.01298								0.06017	0.06347	0.05302	0.04741	0.05742
0.01188	0.01243	0.01287	0.01298								0.06017	0.06347	0.05313	0.04741	0.05742
0.01188	0.01243	0.01287	0.01298								0.06017	0.06347	0.05313	0.04741	0.05742
0.01188	0.01243	0.01287	0.01298								0.06017	0.06358	0.05313	0.04741	0.05753
0.01188	0.01243	0.01287	0.01298								0.06028	0.06358	0.05313	0.04741	0.05753
0.01188	0.01243	0.01287	0.01298								0.06028	0.06358	0.05313	0.04741	0.05753
0.01188	0.01243	0.01287	0.01298								0.06028	0.06358	0.05313	0.04741	0.05753
0.01199	0.01243	0.01287	0.01298								0.06028	0.06358	0.05313	0.04741	0.05753
0.01199	0.01243	0.01287	0.01298								0.06028	0.06369	0.05313	0.04752	0.05753
0.01199	0.01243	0.01287	0.01298								0.06028	0.06369	0.05313	0.04752	0.05753
0.01199	0.01243	0.01287	0.01298								0.06028	0.06369	0.05324	0.04752	0.05764
0.01199	0.01243	0.01287	0.01298								0.06028	0.06369	0.05335	0.04752	0.05764
0.01199	0.01243	0.01298	0.01298								0.06039	0.06369	0.05335	0.04752	0.05764
0.01199	0.01243	0.01298	0.01309								0.06039	0.0638	0.05335	0.04752	0.05764
0.01199	0.01254	0.01298	0.01309								0.06039	0.0638	0.05335	0.04752	0.05764
0.01199	0.01254	0.01298	0.01309								0.06039	0.0638	0.05335	0.04752	0.05764
0.01199	0.01254	0.01298	0.01309								0.06039	0.0638	0.05335	0.04763	0.05775
0.01199	0.01254	0.01298	0.01309								0.06039	0.0638	0.05335	0.04763	0.05775
0.01199	0.01254	0.01298	0.01309								0.06039	0.0638	0.05335	0.04763	0.05775
0.01199	0.01254	0.01298	0.01309								0.06039	0.0638	0.05335	0.04763	0.05775
0.01199	0.01254	0.01298	0.01309								0.06039	0.0638	0.05335	0.04763	0.05775
0.01199	0.01254	0.01298	0.01309								0.06039	0.0638	0.05335	0.04763	0.05775
0.01199	0.01254	0.01298	0.01309								0.06039	0.06391	0.05335	0.04763	0.05775
0.01199	0.01254	0.01298	0.01309								0.06039	0.06391	0.05335	0.04774	0.05786
0.01199	0.01254	0.01298	0.01309								0.0605	0.06391	0.05335	0.04774	0.05786
0.01199	0.01254	0.01298	0.01309								0.0605	0.06391	0.05335	0.04774	0.05786
0.01199	0.01254	0.01298	0.01309								0.0605	0.06391	0.05346	0.04774	0.05786
0.01199	0.01254	0.01298	0.01309								0.0605	0.06391	0.05346	0.04774	0.05786
0.01199	0.01254	0.01298	0.01309								0.0605	0.06391	0.05357	0.04774	0.05786
0.01199	0.01254	0.01298	0.01309								0.0605	0.06402	0.05357	0.04774	0.05786
0.01199	0.01254	0.01298	0.01309								0.0605	0.06402	0.05357	0.04774	0.05786
0.01199	0.01254	0.01298	0.01309								0.0605	0.06402	0.05357	0.04774	0.05786
0.01199	0.01254	0.01298	0.01309								0.06061	0.06402	0.05357	0.04774	0.05797
0.01199	0.01254	0.01298	0.01309								0.06061	0.06402	0.05357	0.04774	0.05797
0.01199	0.01254	0.01298	0.01309								0.06061	0.06402	0.05357	0.04785	0.05797
0.01199	0.01254	0.01298	0.01309								0.06061	0.06402	0.05357	0.04785	0.05797
0.01199	0.01254	0.01298	0.01309								0.06072	0.06413	0.05357	0.04785	0.05797
0.01199	0.01254	0.01298	0.01309								0.06072	0.06413	0.05368	0.04785	0.05797
0.01199	0.01254	0.01298	0.01309								0.06072	0.06413	0.05368	0.04785	0.05797
0.01199	0.01254	0.01298	0.01309								0.06072	0.06413	0.05368	0.04796	0.05808
0.01199	0.01254	0.01298	0.01309								0.06083	0.06413	0.05368	0.04796	0.05808
0.01199	0.01254	0.01298	0.01309								0.06083	0.06413	0.05368	0.04796	0.05808
0.01199	0.01254	0.01298	0.01309								0.06083	0.06424	0.05368	0.04796	0.05808
0.01199	0.01254	0.01309	0.01309								0.06083	0.06424	0.05379	0.04796	0.05808
0.01199	0.01254	0.01309	0.01309								0.06094	0.06424	0.05379	0.04796	0.05808
0.01199	0.01254	0.01309	0.01309								0.06094	0.06424	0.05379	0.04796	0.05819
0.01199	0.01254	0.01309	0.01309								0.06094	0.06424	0.05379	0.04796	0.05819
0.01199	0.01254	0.01309	0.01309								0.06094	0.06424	0.05379	0.04807	0.05819
0.01199	0.01254	0.01309	0.01309								0.06105	0.06424	0.05379	0.04807	0.05819
0.01199	0.01254	0.01309	0.0132								0.06105	0.06435	0.0539	0.04807	0.05819
0.0121	0.01254	0.01309	0.0132								0.06105	0.06435	0.0539	0.04807	0.05819
0.0121	0.01254	0.01309	0.0132								0.06105	0.06446	0.0539	0.04807	0.0583
0.0121	0.01254	0.01309	0.0132								0.06105	0.06446	0.0539	0.04807	0.0583
0.0121	0.01265	0.01309	0.0132								0.06105	0.06457	0.0539	0.04807	0.0583
0.0121	0.01265	0.01309	0.0132								0.06116	0.06457	0.05401	0.04807	0.0583
0.0121	0.01265	0.01309	0.0132								0.06116	0.06457	0.05401	0.04807	0.0583
0.0121	0.01265	0.01309	0.0132								0.06116	0.06457	0.05401	0.04807	0.0583
0.0121	0.01265	0.01309	0.0132								0.06116	0.06457	0.05401	0.04807	0.05841
0.0121	0.01265	0.01309	0.0132								0.06116	0.06457	0.05401	0.04807	0.05841
0.0121	0.01265	0.01309	0.0132								0.06116	0.06468	0.05401	0.04818	0.05841
0.0121	0.01265	0.01309	0.0132								0.06116	0.06468	0.05401	0.04818	0.05852
0.0121	0.01265	0.01309	0.0132								0.06116	0.06468	0.05401	0.04818	0.05852
0.0121	0.01265	0.01309	0.0132								0.06127	0.06468	0.05412	0.04818	0.05852
0.0121	0.01265	0.01309	0.0132								0.06127	0.06468	0.05412	0.04818	0.05852
0.0121	0.01265	0.01309	0.0132								0.06127	0.06468	0.05412	0.04818	0.05852
0.0121	0.01265	0.01309	0.0132								0.06127	0.06468	0.05412	0.04829	0.05852
0.0121	0.01265	0.01309	0.0132								0.06127	0.06479	0.05412	0.04829	0.05852
0.0121	0.01265	0.01309	0.0132								0.06127	0.06479	0.05412	0.04829	0.05852
0.0121	0.01265	0.01309	0.0132								0.06127	0.06479	0.05412	0.04829	0.05863
0.0121	0.01265	0.01309	0.0132								0.06127	0.06479	0.05412	0.0484	0.05863
0.0121	0.01265	0.0132	0.0132								0.06138	0.06479	0.05423	0.0484	0.05863
0.0121	0.01265	0.0132	0.0132								0.06138	0.06479	0.05423	0.0484	0.05863
0.0121	0.01265	0.0132	0.0132								0.06138	0.0649	0.05423	0.0484	0.05863
0.0121	0.01265	0.0132	0.0132								0.06138	0.0649	0.05434	0.0484	0.05863
0.0121	0.01265	0.0132	0.0132								0.06138	0.06501	0.05434	0.0484	0.05863
0.0121	0.01265	0.0132	0.0132								0.06138	0.06501	0.05434	0.0484	0.05863
0.0121	0.01265	0.0132	0.0132								0.06138	0.06501	0.05434	0.0484	0.05874
0.0121	0.01265	0.0132	0.0132								0.06138	0.06501	0.05434	0.0484	0.05874
0.0121	0.01265	0.0132	0.0132								0.06138	0.06512	0.05434	0.0484	0.05874
0.0121	0.01265	0.0132	0.0132								0.06138	0.06512	0.05434	0.0484	0.05874
0.0121	0.01265	0.0132	0.0132								0.06138	0.06512	0.05434	0.0484	0.05874
0.0121	0.01276	0.0132	0.0132								0.06138	0.06512	0.05434	0.04851	0.05885
0.0121	0.01276	0.0132	0.0132								0.06149	0.06512	0.05434	0.04851	0.05885
0.0121	0.01276	0.0132	0.01331								0.06149	0.06512	0.05445	0.04851	0.05885
0.0121	0.01276	0.0132	0.01331								0.06149	0.06512	0.05445	0.04851	0.05885
[truncated: 83,963 more rows]
