# Supplementary material for: Membrane-mediated dimerization potentiates PIP5K lipid kinase activity
Source: eLife. 2022 Aug 17;11:e73747. doi: 10.7554/eLife.73747 (PMC9470164; doi:10.7554/eLife.73747)
Supplement: Figure 4—figure supplement 1—source data 1. [file elife-73747-fig4-figsupp1-data1.xlsx]

## Sheet: Figure - FS1
Figure 4 - figure supplement 1A				Figure 4 - figure supplement 1B				Figure 4 - figure supplement 1C				Figure 4 - figure supplement 1D
mNG-5KA single particle intensity (AU)	Fluorescence Intensity (AU) Bin Center	Frequency		mNG-5KA (D107R) single particle intensity (AU)	Fluorescence Intensity (AU) Bin Center	Frequency		mNG-z5KA single particle intensity (AU)	Fluorescence Intensity (AU) Bin Center	Frequency		mNG-z5KA (D84R) single particle intensity (AU)	Fluorescence Intensity (AU) Bin Center	Frequency
4861	0	0		4823	0	0		4864	0	0		4855	0	0
5675	400	0		4020	400	0		5629	400	0		4916	400	0
7739	800	0		3721	800	0		5267	800	0		3343	800	0
4642	1200	0		4064	1200	0		6868	1200	0		3940	1200	0
3637	1600	0		6185	1600	0		4009	1600	0		5018	1600	0
4483	2000	0		4683	2000	0		5215	2000	0		5787	2000	0
4676	2400	0		5421	2400	0		6935	2400	0		5357	2400	0
5426	2800	0.0161043		5255	2800	0.0165361		4562	2800	0		3772	2800	0
4904	3200	0.095092		4628	3200	0.0739774		4290	3200	0.0176574		5262	3200	0.0325511
3982	3600	0.144172		4439	3600	0.127937		3625	3600	0.133019		4344	3600	0.177896
4767	4000	0.141104		3610	4000	0.131419		3684	4000	0.160094		3525	4000	0.216503
3471	4400	0.121933		5538	4400	0.145344		5857	4400	0.161271		4872	4400	0.186223
5805	4800	0.131135		4594	4800	0.125326		4262	4800	0.141848		4289	4800	0.137774
6442	5200	0.0812883		4932	5200	0.103568		4107	5200	0.114773		5766	5200	0.0953823
5313	5600	0.077454		3836	5600	0.0852916		3774	5600	0.0788699		5006	5600	0.0620742
11065	6000	0.041411		4888	6000	0.0661445		3492	6000	0.0541495		3653	6000	0.0355791
12622	6400	0.0483129		6708	6400	0.0356832		10709	6400	0.0341377		3946	6400	0.0234671
5861	6800	0.0161043		7200	6800	0.0287206		5483	6800	0.0258976		4094	6800	0.00757002
4351	7200	0.00920245		4220	7200	0.0226284		4650	7200	0.0129488		4493	7200	0.010598
3729	7600	0.00920245		3115	7600	0.0121845		4752	7600	0.00765156		4017	7600	0.00302801
3895	8000	0.00613497		3655	8000	0.00870322		6710	8000	0.00706298		3894	8000	0.00302801
3585	8400	0.00613497		4937	8400	0.00522193		9195	8400	0.0094173		4054	8400	0.00302801
4749	8800	0.00306748		5480	8800	0.00522193		4309	8800	0.00353149		3674	8800	0.000757002
4215	9200	0.000766871		4416	9200	0.000870322		5378	9200	0.00588582		5121	9200	0
3079	9600	0.00153374		3202	9600	0.00261097		4162	9600	0.00353149		4460	9600	0.001514
2792	10000	0.0053681		3903	10000	0.000870322		9740	10000	0.00470865		4725	10000	0
3665	10400	0.00460123		9796	10400	0		4858	10400	0.00235433		5348	10400	0
5492	10800	0.00383436		4544	10800	0.000870322		4246	10800	0.00412007		3532	10800	0
3881	11200	0.00306748		4213	11200	0		4764	11200	0.00353149		3737	11200	0
4611	11600	0.00460123		3970	11600	0		3684	11600	0.00176574		3926	11600	0
14716	12000	0.00230061		5170	12000	0		3790	12000	0.00176574		4802	12000	0
7242	12400	0.0053681		4605	12400	0.000870322		4057	12400	0.00353149		3700	12400	0
7005	12800	0.00460123		3618				4049	12800	0.00117716		4636	12800	0
4030	13200	0.00460123		4533				4700	13200	0.00117716		3986	13200	0
6387	13600	0.00153374		5039				3880	13600	0.000588582		7061	13600	0.000757002
9825	14000	0.00306748		6185				4978	14000	0		4572	14000	0.000757002
6430	14400	0.00153374		3406				5187	14400	0.000588582		5141	14400	0
7355	14800	0.00153374		4107				4789	14800	0.000588582		3646	14800	0
5437	15200	0.00153374		3866				4554	15200	0.000588582		5420	15200	0
5822	15600	0.000766871		5524				4827	15600	0.00117716		4499	15600	0.000757002
13050	16000	0.000766871		5022				5121	16000	0		3850	16000	0
6526	16400	0		4330				4399	16400	0		4288	16400	0
3705	16800	0		4668				5070	16800	0		13487	16800	0.000757002
4206	17200	0		5512				5077	17200	0		4052
4049	17600	0		5650				4981	17600	0		3808
4641	18000	0		5503				7040	18000	0		4702
3132	18400	0		5147				4183	18400	0		4366
6772	18800	0		4412				4609	18800	0		4844
5852	19200	0		3786				5488	19200	0		3566
3546	19600	0		3676				4224	19600	0.000588582		4795
4611	20000	0		3115				4294				5798
4170	20400	0		5852				6841				6397
5712	20800	0		3703				3524				5879
5358	21200	0		6844				5134				4709
3975	21600	0		4266				4766				3630
3424	22000	0		5900				4930				4163
3721	22400	0		7247				3741				4343
3743	22800	0		3350				9924				5011
12735	23200	0		4410				4736				4360
3491	23600	0		3946				4433				5264
4805	24000	0.000766871		5276				4904				6196
4498				3956				4566				4199
6344				3932				13266				3437
3491				5520				7294				4099
3205				6119				5179				4668
4662				4774				4793				3244
3211				5305				4586				4882
4628				6669				4613				3351
5231				4605				3663				4477
4813				3207				4429				3294
3319				6413				3706				4306
6356				3836				3599				4316
4529				3063				4268				5516
5950				5551				4047				4454
4042				4167				6649				5800
3217				5426				5510				5572
4327				4257				4372				3647
5567				4004				3847				4689
5779				6247				5577				4459
12217				3260				6112				3690
4400				4569				4038				4310
4835				3712				3878				5132
5219				4386				4351				4676
3057				3106				5208				3629
5225				4015				5261				4494
3682				4243				5577				5743
5052				5177				6492				4982
5603				4209				4632				4656
5678				3001				5255				3816
4717				4022				6489				3933
4128				6710				3430				5242
4532				4630				3813				3677
3295				4630				4673				4368
4226				7602				4396				4518
5048				3380				4895				3736
3868				5496				5664				4492
3417				5881				3488				4729
3418				4722				5236				4628
5411				5836				5136				3898
3302				7259				9124				5436
5874				5313				5631				4619
4191				3604				3695				3584
4291				5281				4457				4045
3063				6769				5252				3919
4571				4352				3416				4705
3705				4764				6195				3374
4243				5143				6362				4054
3796				5475				5588				4095
4798				4241				12958				4705
4020				4864				3599				4476
3173				2993				7953				3561
3897				3547				3502				4388
3087				4660				10915				3680
7207				7067				3588				4091
5071				4248				6163				3859
4198				6549				4800				4564
3707				4756				4314				5420
4466				4546				3322				3947
4232				4095				4204				4030
3858				4772				3928				5903
5124				5521				9463				5058
3841				4594				4948				5112
7273				4273				6459				6554
5636				3241				6129				6221
4272				6335				4729				4751
6322				5163				5930				3542
5469				5441				5798				5125
4483				4759				4361				4132
6458				4559				3744				3890
5552				3640				5712				6296
3539				4497				4630				3683
3773				3777				6533				4032
5156				5825				3819				4221
4165				6822				5214				5146
4606				4632				5337				3970
3665				4426				6072				4306
3791				5682				4018				4367
3610				4717				3956				3306
4637				5292				9355				5047
4678				5111				4600				3561
4581				3975				4841				4423
4002				3824				4166				3313
4409				5130				4080				3421
3489				4390				5018				4225
5228				4210				5953				3649
3615				4611				4171				3518
6777				6131				5356				5831
3439				4940				4742				4480
13543				3077				7125				4900
7657				3764				5066				4183
4829				4218				8500				4444
4467				3885				3561				4985
4989				3777				4094				5565
4950				6945				11831				4727
3450				7502				4437				4585
4131				6077				10952				4507
5284				6099				4666				3811
5297				3773				5173				15758
4125				4619				5407				5789
3588				4563				6375				4386
3123				5316				5070				5664
5193				3717				5271				4631
5508				8020				4394				5127
15701				4751				6248				3671
7034				4300				5857				3966
5544				6335				4414				5201
5186				5851				3961				4419
3394				4701				5024				3855
4692				6966				5100				4093
3772				4663				3534				4068
4628				3697				5814				3826
3590				5715				4031				3828
4858				5265				5846				4563
4395				3362				4786				3377
8703				6281				8268				3549
4069				5353				4797				3482
7934				3825				4678				4514
3127				4585				4032				3446
5392				4039				11297				3986
5246				3806				3511				5160
5870				2894				3807				3983
2984				4055				3891				5061
5672				5328				4666				4543
4694				4042				7584				4047
3913				4506				4172				3712
4748				4193				7142				5066
5743				3768				7196				3951
3234				4933				5009				4600
4023				3209				5524				3974
3701				3598				3951				4198
5962				5094				6492				5332
3835				5321				6391				4294
5224				5825				4943				3874
4642				3247				4691				3897
3929				7218				6484				3860
4238				3017				4322				5192
4589				5027				4398				5705
3868				6127				4575				5131
13273				4694				4245				4541
6887				2921				4936				3904
5835				5129				4980				5712
5725				4214				4038				6211
3739				5835				5498				3902
4194				4858				5581				4312
3635				7208				4086				6542
5444				4351				5024				4069
5670				7223				4352				5920
5715				4301				3404				4089
4515				5880				4169				3538
3605				5967				3919				4760
3495				6947				5826				4496
4836				4693				3848				3790
3431				6754				3607				3931
4527				5517				3714				4810
3259				2990				3516				4505
4311				4864				3505				3586
5223				6425				5904				5834
4991				3718				3925				4188
4766				5395				7391				4209
4369				4732				5598				4206
4891				5247				4883				3871
3920				6706				5191				3865
5020				4753				6718				3484
5932				3994				5245				5254
3547				5345				7928				4489
3284				4536				4686				3774
5146				7888				5365				3943
5796				6210				5350				3759
3425				5004				5515				4938
3541				4245				4234				4585
4741				4035				7613				3472
3080				6245				4475				3367
4496				5616				5219				6004
5512				4072				4987				3931
3045				4935				6748				4371
11026				5771				4232				3917
4775				5659				5544				4481
3980				7148				3719				3871
4769				5180				8212				5358
5997				3583				4695				3590
6667				4184				6999				4114
6291				5750				4442				3847
4139				4292				8938				3910
6522				4861				6039				4897
8887				5738				5714				3756
5707				8609				4243				5301
5514				4856				4984				4531
5003				5391				3684				4166
4588				5979				4043				3264
4448				4448				4712				4200
3794				8322				7713				3797
3524				5928				6608				4012
5325				3029				6148				3436
5091				5125				3696				4040
6233				3277				4712				3341
5801				3614				10009				3542
10692				4456				3627				3240
7624				3126				3433				5086
5281				5517				4962				4340
4360				5079				5980				8294
3301				5517				3547				3714
5909				4384				4386				4057
4055				5306				5649				4834
4081				5139				4395				8307
4139				4012				3882				4327
2987				4801				4021				6510
4613				7253				5679				6445
5430				5491				3690				3432
4708				5866				6931				3489
4940				3059				4753				3920
3991				4893				4343				6192
6103				5158				4792				3816
4506				5838				4250				4912
3383				4710				6236				4172
5160				5141				6393				4657
4128				4770				4615				5440
4171				4107				3522				4922
6202				5018				5558				3846
4977				3050				4254				3346
5013				3848				5450				4120
4732				4240				4063				3333
5165				3551				8331				5901
4775				5244				3823				4786
3218				5652				4516				7085
2987				5983				5741				4667
3235				2846				4081				3827
4727				4306				4376				5879
4877				4345				10903				3553
6158				4025				5694				4073
4936				3898				4444				4424
4821				4905				4873				4784
4094				4764				5821				4358
4949				3785				4799				6357
3745				6344				3704				5884
3524				3861				4777				4178
3903				4007				5348				3747
4306				5553				5657				4357
5908				9460				10415				6978
4078				3767				9614				3619
3535				7076				5470				3942
3695				4784				3902				3424
3273				4634				3659				4119
12068				3758				6654				3507
9514				4599				3738				3291
11354				5574				6460				3982
3812				5193				3620				4125
3943				6082				3768				4062
3832				5098				4407				5945
3986				8270				5098				3587
4859				5497				6098				7061
3676				4583				3813				3598
10814				4221				5343				4735
3164				3489				9825				4058
5966				3628				3791				4613
3505				6524				4147				5468
6299				4902				3801				4076
5303				4812				12401				4719
12802				2909				6019				4079
3618				10138				4307				3453
7507				4792				4393				5241
5603				7516				6279				3995
4701				6503				4140				4854
3737				3512				3397				3354
6024				2967				6100				4110
5943				3331				4857				5505
4510				4271				3792				3858
3844				3883				5060				5045
6407				5555				7240				5250
8229				2819				4089				3363
6082				3472				4268				4066
7421				3779				7286				4058
5504				4764				5827				4446
6097				3646				15753				3454
3972				3692				5339				4081
3658				5128				7185				3625
3541				4982				6396				4628
3668				5464				4601				6458
5857				5535				5401				4808
4707				3030				3818				4052
4500				5364				5458				4632
4794				5403				4339				3393
8413				3051				5786				3443
6406				6009				4915				4221
4732				4627				4322				3964
5136				4598				5803				5141
6323				5701				5553				3497
5014				4156				3889				3682
3412				3968				4781				4250
4913				3476				3342				4312
4222				5461				3726				4451
4313				4012				4401				4797
3065				5438				5108				3519
3318				4579				3655				5074
3784				4960				4849				4566
4561				6927				5792				5316
3856				6269				6086				5786
6595				5003				4323				5373
3955				4680				5494				3389
4547				5468				4839				4939
4053				3160				3517				5409
4394				4104				3662				4513
3039				4802				4131				3928
3604				4637				3772				5136
4740				3557				4070				4068
3395				7629				3631				3708
3917				3424				8626				3755
3096				5897				3567				3638
4526				7579				3643				4059
6220				5078				8966				4217
3315				3684				4155				7847
4183				10932				3986				5129
5207				3697				5070				4857
6231				4101				6767				6042
4945				3724				6137				4654
3256				3736				3783				3415
3154				3299				4409				3602
4803				4949				5336				4064
4904				4150				4498				4724
3069				3446				4867				3696
4334				4218				5393				3855
3916				3486				3648				4682
5601				5695				4932				3950
4334				4872				9309				3853
6669				4046				4517				3957
4536				3569				3655				3759
4297				3407				4554				5001
4380				4411				3720				5393
3774				3847				4014				4569
4585				3136				3964				4992
4388				4572				4536				3261
4057				4948				5057				7430
3805				5442				3724				3683
3385				7136				4368				5602
13837				4672				4441				3542
3877				4719				4753				3410
5558				4438				4142				4583
11701				3449				3654				4657
3494				4777				3556				3824
3000				6756				3344				3907
5700				4569				8901				3354
3902				6470				3796				3654
4078				5331				3376				3854
3796				5680				3976				4296
4463				4857				4477				4879
4769				4262				3748				3971
4603				5278				5098				3565
4413				5889				4731				4206
4912				4543				4440				3555
3532				3767				4847				4756
4047				3615				8560				4536
4754				4505				4296				3902
3202				4617				3409				4445
4819				5129				4373				3894
4585				5639				5417				5639
6222				3976				5518				3921
4208				5414				6840				3925
4218				5767				6438				3331
7665				3099				5478				3678
4726				4585				3420				3640
5246				4844				3405				5171
3218				7888				3534				4219
4735				3827				3901				6382
4132				3745				4193				5233
4367				3545				4155				4002
5275				5109				5606				3424
6239				3622				4035				4253
3900				4216				4161				4739
5572				5029				5683				4669
4508				3242				5294				4530
5305				4484				7368				3918
4757				3137				3699				5192
3107				3162				3698				3815
6204				4112				4112				3545
3574				5159				3975				5846
3270				4205				4957				3316
3931				3066				4939				3882
4289				3760				5616				3982
4141				4044				5418				3771
7845				4569				4393				4281
10914				3498				5504				3427
5100				5116				4689				5682
9082				4121				4968				4074
3038				4557				12588				6092
3122				6737				13649				4890
3581				3579				4835				3984
5026				3978				3816				4053
6656				5186				4652				4269
3959				3513				3468				4799
4878				2966				4728				4389
4814				5207				5990				3376
5115				4529				4243				4050
4304				5672				5139				4294
3742				5166				4541				4583
4140				3634				4007				5914
6307				5418				4951				3709
5088				7274				4422				3694
3612				5655				4960				3408
3983				4381				3840				4588
8309				5655				4240				4590
6051				3970				3295				3657
5009				4116				4739				3393
3270				7397				4887				6366
4175				6285				4091				4987
4168				3647				4630				4462
4912				4970				4149				4226
6501				4412				3521				3384
4494				4446				4608				7196
4781				4502				5465				4898
3578				4615				4845				5661
3606				3567				6165				3746
5083				4772				5024				5334
3542				4494				7007				3720
3726				5560				6174				4745
4524				3571				5078				5305
11490				5319				5904				3696
3355				3371				6099				4275
3376				5516				4920				4151
5266				4639				5005				5399
4588				4483				4273				4857
4544				5266				9748				4259
4605				5272				4095				4530
3552				3237				4538				5793
5673				5633				6897				4962
4907				5996				4279				3740
2964				7085				5177				3542
9511				4698				3990				5446
5614				4279				5410				4215
6232				6706				5436				4458
4098				6343				4015				3720
5991				4980				4924				3462
6254				3343				4091				3412
4755				3871				4734				4656
5020				3047				5682				3646
4340				4976				4319				3975
6342				4134				4878				5675
5637				3527				3981				4639
4074				5027				4006				5367
4275				4879				4161				3686
5596				5070				4954				5122
3430				4832				4098				4258
5332				3169				3932				3611
4258				3437				3735				3434
4261				6553				4383				5226
4424				3922				5354				4263
5548				5385				4265				6354
3337				5894				4778				3565
4602				5320				4646				4271
5753				5240				3852				6091
3509				3752				5403				4798
5729				5983				4236				3325
5576				4016				4980				3726
4814				6540				4425				5254
3338				6154				5182				4946
3765				3447				5755				4212
4648				3995				6894				3616
12913				5850				5598				3568
11959				4617				3895				3380
4454				5512				4209				3604
6874				4369				5143				4190
3395				5722				3473				4074
4834				5008				5589				4632
5225				3991				6020				3625
11526				4637				4694				5256
5206				3120				3937				4396
3542				3948				6226				3625
3635				4148				5138				5765
3708				3645				4878				3458
4188				3691				5398				6221
11746				7097				3404				3721
3657				3479				3925				3356
5302				5780				4633				6212
6563				6360				3990				4155
4335				7627				9090				4903
5513				5864				4039				4257
3519				5828				3641				4970
4337				3656				3513				4156
7768				5297				5610				4159
6752				3785				4238				4304
4786				4062				4158				3611
3351				3472				4829				4229
6422				6642				4314				4417
4748				4006				4538				3817
4169				7040				3677				5079
10799				4233				4357				4605
5807				4065				4587				4892
4735				9257				4645				4855
5231				5468				6046				5574
4386				4654				3945				5219
6431				4133				4095				4110
3487				3630				3775				5220
4034				4128				3720				3617
4331				3550				3936				4954
6181				4594				4963				3890
3752				4351				5659				4271
3897				6018				3810				4145
3446				4192				5011				3675
6660				4365				5154				6825
5075				3100				5974				4270
6290				4728				4266				4327
5558				4112				5302				3525
14224				6819				7642				3965
3173				5971				5965				4504
3679				5869				6167				4502
4261				4086				4308				4204
6565				4808				5069				5660
4010				4838				6252				4000
4009				5919				3614				4261
4683				4300				3399				5036
4554				4389				5317				5031
3417				4135				4600				3928
5133				4115				3928				4216
5986				8564				3548				3903
3582				5036				5144				4302
3258				4664				4899				4416
4058				4504				4849				3772
5974				5332				4010				4109
6344				5213				5975				3804
6058				4247				4142				4519
5734				3163				4653				3613
4014				5728				3632				3924
5202				5221				4904				3395
3654				5196				6262				4076
4131				3327				5668				4335
12444				3039				4839				4472
3147				5433				3721				4782
3746				3548				5039				3558
5487				6689				3905				6211
3516				4079				4831				5926
3427				5224				4344				3943
5959				4524				4184				4270
5512				5178				5232				4937
3827				8004				5669				3885
4199				4248				4294				5370
5716				4597				3914				4480
4608				5779				4011				5660
4017				4041				4025				3613
5058				6360				4622				3975
3508				4083				4216				5290
4377				4800				4067				4343
3886				4784				5006				5916
8287				6099				5283				5513
4088				4172				3240				4156
5655				5554				3980				6194
4875				5279				4139				4296
5035				3350				5025				3616
4984				3931				4346				4266
5052				6477				4066				4549
5860				4399				3830				3472
9884				3745				4797				4772
4363				3350				3342				4582
3793				5288				4294				4409
4990				7435				4226				4969
4710				7207				5566				3860
4165				3759				6104				3765
4232				4139				4064				3541
5951				4040				5013				4146
4738				3745				3931				4565
5677				5984				4477				4389
5563				5578				3964				5158
4752				3219				4974				5550
6243				5274				3986				3808
4108				5113				4695				3626
3238				4310				5516				3714
4133				4578				5752				6279
4320				5975				4201				4445
4969				3685				5824				3517
16028				4059				3649				4441
4689				3244				6255				3682
4033				4481				4575				3399
5021				3441				3880				5969
3635				3106				13118				5040
4724				3539				4728				3603
3902				6757				7128				5021
4772				6313				5382				4688
3466				5241				4018				3469
4698				2832				3909				4983
5665				4686				6940				4101
5045				6049				4593				4443
9875				5775				3749				3890
4508				3750				4426				4042
5911				4428				3987				4637
6514				4161				5157				5211
5132				3018				4965				4431
3605				6005				4701				3613
3402				4743				6446				7189
3744				4678				5028				4733
3724				7887				4099				5286
4332				3326				5039				5166
4259				4758				4488				4470
6191				3722				3982				4691
5297				7194				4235				4756
4298				6843				5223				4112
3973				5162				5424				4339
5059				4028				4150				4159
3923				4803				3274				4109
4771				6352				4401				3871
13387				6698				7716				4103
3759				7834				4003				3664
6348				7559				3526				3808
4174				3127				4569				4592
4723				3418				6790				3472
5472				3543				5329				4218
5520				4734				5324				5172
10329				6100				4671				4072
4494				6797				10978				4256
4636				6193				4875				4503
4131				4645				6023				4555
3778				3713				4070				3394
4057				4447				5263				3381
6149				3391				4903				4336
5420				3403				5233				4033
5060				4779				6252				3568
4827				7994				5559				6224
5218				3627				6219				5092
5535				3637				6408				5143
3609				4860				6313				3482
4241				6060				4148				5515
10379				3532				4057				5126
3493				4428				5074				5813
4764				3797				4900				5093
6926				5791				5815				3948
3084				4051				4967				4452
3432				3289				5649				4524
4294				4281				5288				5845
4334				3663				3530				4791
6452				6116				10668				5042
5330				3568				4622				3445
3647				3515				4702				4606
10532				3818				5182				4902
3971				3579				4106				5878
4366				5973				4864				3611
3604				6696				3330				4316
3260				4728				3870				4507
3645				4069				3427				5071
8168				4179				5750				4136
3880				5461				4894				5469
4429				4430				5293				3396
8702				5416				12288				4055
5218				4114				4586				4521
7430				4262				5005				5298
3963				4874				6318				4079
6842				3274				4180				3571
6043				4299				3514				3829
4248				3760				4117				3865
4637				8174				5397				4609
3895				5957				6705				4256
5849				4355				5235				4124
6091				4309				4237				4191
4125				6127				3541				4432
3916				3400				5824				4868
4013				4600				4438				3906
5227				5115				5960				5105
3498				5273				4229				4545
5173				5072				5840				6788
5582				6459				3555				4374
5444				5580				5101				3539
4748				3822				5364				4577
6553				8598				7065				5637
3922				4886				9037				3929
7147				6720				4077				6140
4111				3880				4200				4291
4345				8783				3946				3899
4565				3574				3824				4512
3308				3994				5154				5569
4209				5876				5056				5654
4505				7059				11803				4315
4746				3721				4011				4002
5068				4475				4465				4045
7468				5241				4746				4107
5199				4679				5613				4528
3932				3032				4914				5657
7451				3918				3611				4934
4754				4328				4432				3648
4307				3396				4408				4046
5080				4198				4732				4304
4515				3884				4272				3957
3842				6001				4836				5662
3278				3225				5662				3621
6401				4622				3537				4427
3321				3207				5457				4633
4449				5366				3450				4499
5392				5084				5988				4964
3440				3534				4289				3416
4846				3590				5865				3897
3606				4809				4262				3721
4185				4408				4881				4196
3410				4333				3985				4419
4149				5781				7031				4038
3066				6386				5450				3671
4538				5253				4415				4121
5559				3808				5000				4058
14170				5663				3610				3816
10008				3463				5517				4512
4852				3550				4513				4176
4903				12530				4459				4447
4278				4103				8381				5322
4853				5737				3576				4292
3244				2941				4687				6375
5192				3930				5387				3964
4368				3269				4600				4728
3159				7490				4536				7499
6249				6401				4657				4726
7297				4665				6019				5709
5291				5285				3822				3862
4742				4055				5189				4458
5636				6688				4985				4262
3999				7270				4443				5590
4465				3278				6677				6329
4995				4395				11995				4037
5230				4046				3513				6182
4625				4166				4283				3993
6592				4521				4309				4121
4703				4875				5676				4954
3052				7583				4273				4029
4729				4212				4652				5058
4827				3425				4073				3876
3977				5435				8400				4803
3849				5076				3977				4064
4008				3244				3496				3756
3508				4656				6897				3500
10304				4338				4995				5821
3298				2941				4003				5547
5081				5236				4069				3466
4687				3488				4883				4928
5414				6130				6932				4156
5122				4430				4974				3481
4902				6673				4694				5127
4852				4314				5055				3599
3133				4150				4299				4210
4771				4480				5192				4245
3823				5079				11720				4750
3385				5546				4795				4324
5475				2993				3922				4443
3411				4828				4596				4779
5035				4121				5175				5927
4021				3298				4473				4134
6228				4807				10249				5518
4082				3174				4481				3898
4108				3998				3722				5357
4070				6250				4845				3464
3298				3388				4058				4817
4640				4483				6130				3943
5425				4470				4575				3674
13110				5068				5198				3966
4720				5270				5826				3654
7623				4817				4558				4650
6133				5921				4935				7291
3366				3569				5638				3615
4556				5114				4390				3622
3836				5724				3479				4426
11890				4480				4626				4086
5888				4540				5497				3748
3455				4172				3477				4522
3199				4240				3520				4273
3258				7708				3532				4415
4169				5471				4973				3339
14473				6326				3366				4147
4727				3790				4061				3922
6994				4353				3905				4614
5700				4763				4976				3930
4012				3338				3743				5952
5213				4877				5828				4043
12402				6566				6293				3866
4069				3273				4072				3945
6285				4044				5176				3711
3911				4894				5339				5492
4778				6512				4518				4930
3434				3735				4376				5682
5045				3627				3744				3996
15032				3904				6777				3417
3750				4106				3931				4022
3633				4154				5938				4201
4309				2982				3382				3757
6579				3650				5455				5874
4645				6991				5579				5772
4233				3391				9569				3711
3306				5794				4377				6129
15149				3920				3720				5445
7286				4441				4519				5724
4617				4838				3976				4693
5568				2967				4411				3617
4778				4126				3424				5304
7946				3573				5487				5384
5276				4664				4346				3955
3483				5308				4285				5343
5158				4412				5674				4446
12647				5508				4334				6819
3093				5134				3859				4658
5706				7095				3517				5782
4503				5862				5196				4096
2976				4811				5401				3822
3507				7002				3784				4473
3023				3472				3577				3605
4783				6625				8124				3504
11503				3608				3766				4226
12299				5395				4278				4121
4973				4542				8488				4511
4613				3425				3876				8574
3928				4866				4415				3869
2887				5204				3938				6878
4230				4929				6423				3385
4274				5088				5538				3819
4303				4048				4882				3663
3172				4332				7691				4012
3742				3782				4230				3393
2956				5759				3970				4225
5642				4474				4639				4118
4595				4196				3897				4980
3286				4528				4135				4268
5256				3733				3995				5323
4046				3588				4181				3871
4658				5433				3601				3874
3696				3569				3919				3627
3556				8912				6191				5256
5762				3353				4884				4885
5627				4604				5277				4035
6117				6530				3599				7247
4590				5387				4317				5492
5746				3477				3874				3456
4149				6315				4537				5242
6344				5877				4353				4912
3750				4541				4251				4454
5288				5967				4397				4002
4327				7765				4870				4705
3691				4967				3452				5643
7143				4709				3906				4354
4456				6464				5162				5733
3594				5979				5715				5646
7186				4930				10474				4448
3137				4022				4847				5044
4231				5582				4734				4034
3779				3741				3974				9517
4001				4055				4865				5227
3966				3010				4999				5702
4390				5532				4593				4438
4631				3955				5200				3587
5954				4870				15649				4072
3288				3469				3584				5369
3686				6763				4942				4473
2966				4263				3863				4567
4067				3993				3922				5021
3943				5162				5208				4487
12780				3037				3825				4893
4205				4096				3661				4083
4750				4197				3514				4337
5859				6686				4534				6086
3183				5312				5803				5119
3903				3896				4571				5670
3534				4344				5728				4127
3995				6110				5427				3737
3577				4468				7026				4171
6534				3671				3764				3537
8054				7400				5273				4382
2988				4788				4579				5675
4980				4464				3623				4342
4211				4636				4612				3688
3075				5389				5267				7018
5626				8797				3789				3927
4567				4168				4559				3587
10036				8310				3864				4861
5854				4911				6333				3410
3183				4397				5626				3603
3774				5617				3442				7254
24051				6125				5342				4578
4327				3966				6281				4919
4127				6081				6977				5088
3776				4704				3462				4179
3912				6041				3675				3538
4489				4766				4378				5380
3278				4266				4053				5083
3280				3877				4424				5948
4651				5203				3946				3871
5252				5420				5586				5117
3377				3751				3939				3990
3336				6441				5749				4247
4993				5363				4180				4968
5536				5742				3384				4374
3070				5096				4271				5048
4136				5570				11235				4045
3272				5589				3493				3767
3732				5916				5578				4030
4031				3701				4983				5218
5094				3530				5081				9446
6442				3295				4092				3749
5613				3079				4165				4189
4211				4384				5123				3421
4751				3974				5343				3913
5714				7123				6757				3677
3739				4489				3484				3923
5643				4729				14914				4683
4000				3881				3376				4796
4029				5812				3843				4525
4886				4324				4938				4637
3419				3581				5430				4881
5510				5216				5193				4284
4239				4413				5323				4155
3498				3184				4524				4160
4997				4103				3673				3545
6615				4274				3593				6276
14784				5347				4109				5591
3853				7841				3958				6779
4693				6152				5992				3804
4152				5942				4051				5199
3678				5609				4941				5616
6558				5142				4274				3558
4201				2899				3702				4722
6515				6436				9175				5055
5387				5258				4247				4734
3614				4761				3796				4025
4241				6513				4099				4686
13999				4923				8014				3750
3227				4561				3579				4683
4782				5606				3451				3795
3343				6265				4755				3794
3078				5688				3838				4775
3478				5479				4610				3409
3452				4360				4339				3484
4267				5201				4741				3728
4895				5718				3825				5493
8033				4670				4571				5935
3552				5836				4883				4834
3732				5198				5093				4645
5283				4103				3652				3870
5332				5118				3699				3730
3459				4013				4025				5486
5756				5344				3370				3878
4528				5590				4231				3830
3935				3360				5104				3807
6663				5915				3830				4692
6547				4541				4873				4026
4355				3735				4140				4983
4077				4816				7221				4922
5216				3650				3683				5645
4006				3686				3346				4531
5055				3840				12632				4702
3574				3142				4755				3974
4083				5709				4402				7054
4009				4259				4282				4519
4424				3644				4755				6232
5368				5653				4570				4139
4104				3443				3327				7252
4897				6494				4338				6740
3413				5786				4178				3963
4487				5640				6033				5150
4477				3323				3468				4752
4323				4402				5383				4594
3290				4337				5850				4841
3608				3901				6164				3919
3981				4680				5067				3593
3287				4461				6882				4364
3940				4119				3993				3646
3541				4554				3601				6941
6154				4690				4094				4771
2902				3710				4616				4600
3319				3946				5876				4468
6262				6241				4217				4305
3162				5899				10990				3759
3588				4876				3871				3648
4902				4729				4672				4350
3363				7407				4027				3284
12435				4093				5057				3456
4123				4673				3993				3729
14108				4604				3621				3519
3463				5843				5581				3710
6680				4473				5997				3564
7868				4221				6480				4256
5832				8803				4454				3484
3782				5660				3841				3909
5749				3263				4486				14196
6551				3039				6571				5116
4693				8537				4320				4767
4134				4409				5786				4156
3744				7080				3809				4773
6372				3956				3753				4792
5496				2744				6172				3587
4523				4632				6088				6248
10142				4336				3776				6126
6538				3789				5401				7649
5554				3757				5441				4428
4452				3595				3795				4304
4028				3729				3650				6347
4370				3901				4294				4638
4292				4690				3588				4723
2952				6184				4424				3502
4401				3795				4805				3432
5443				5721				3705				3974
3339				3965				3547				4477
3451				4225				6655				4992
5572				6745				4270				4954
2926				3948				5411				5125
3430				3929				9119				5487
4863				9570				4413				5219
7996				5631				3937				3902
3029				4164				4870				4313
4010				4820				4349				5392
4662				2897				3920				4019
3207				8098				12277				6029
2913				3359				3851				5810
3567				6193				6066				4666
3044				4940				3582				3555
3875				3007				3551				5365
4437				4785				10129				4318
5189				2947				5312				4996
3886				3496				6698				4782
5537				5011				3888				3839
5011				3991				3445				5052
5263				6685				5492				6333
4042				5818				3665				5640
6179				3756				4762				4051
3217				3526				5571				4789
4007				3945				3586				4620
5930				5347				4864				4976
6553				4258				4858				5450
6474				3566				5138				3679
6385				4046				3572				4477
5061				6908				4137				4726
3893				3683				5965				8080
8604				4258				4921				5334
3401				4731				5607				5116
4826				5052				4685				4863
3521				3546				4947				6521
4051				3748				3587				4722
3629				5288				6604				4700
3724				5220				3926				4583
3994				3138				3329				6212
4949				5909				5123				4386
8546				4157				7481				3937
8452				4140				5488				3797
5080				3287				4382				6063
3770				3027				6435				3564
4587				3944				3586				4086
2969				5252				4694				5736
5668				6026				4536				6140
5894				3100				4093				4044
4457				4609				3739				4335
6257				4319				4444				4818
4873				3711				4114				3974
8242				4910				3723				4430
2992				4563				5212				4146
3676				5588				4378				5637
3367				3942				5182				3650
3959				3607				3610				3497
5765				3584				3728				3855
3467				3920				4602				4377
4504				5172				3501				3466
9862				4788				3491				3916
3871				4480				5192				4151
4437				4452				3937				3599
6766				4330				5447				4143
3450				4076				6404				4744
5963				4711				3899				4525
5084				4251				5051				5447
5017				4677				5889				5067
8478				4165				11130				3788
3185				6089				5234				4555
3362				3371				4389				3437
11334				3556				3747				4494
3812				6397				3892				7829
4617				4010				7264				3856
3771				4316				4093				6027
4880				4414				6829				4228
5646				4544				6155				4213
4009				3873				4103				4482
3660				7075				3987				4414
2996				5695				6044				6106
6290				6375				4887				3864
3773				7129				4196				3951
4767				4320				5349				3889
5544				4579				3523				4876
13275				4593				4224				5060
4974				8886				4963				4451
10346				5051				5270				5712
3900				4216				4557				3982
3138				5565				7916				3967
3110				6005				6147				5573
3194				4094				5872				4029
4061				4201				4526				4094
5601				4217				4640				3596
5505				4024				6274				4370
3859				3666				4240				4878
3715				4175				5261				3509
4662				4376				7860				3920
3804				4404				4874				3918
5495				4286				3744				4288
3074				3088				6421				6823
5517				4301				7900				3783
4336				5118				5132				4659
3711				4577				5477				4278
3280				3772				4003				3418
5076								4236				4762
3855								4232				5436
4627								3833				5682
5625								5043				4424
13096								5197				3899
4634								5546				5130
6548								4935				5504
4767								4429				5736
4575								4702				5504
4541								4907				6176
3768								3823				4177
3158								3660				16991
3395								4609				5418
4810								5780				3492
3084								6360				4638
3467								4878				4400
4366								9893				3439
6687								4515				5966
5331								3550				5419
4411								5035				4858
4812								4409				5143
3397								5567				3375
4700								3574				4275
4156								6700				4691
13474								6796				5379
3461								3498				6152
3728								6049				4289
3991								4689				4484
5869								14531				4602
3615								3588				5255
6374								3439				4532
5719								4032				4073
3707								6939				4941
4377								5327				4019
2947								5348				4212
4434								6606				3402
5019								4309				4505
5172								4391				3437
3437								4137				5069
5565								6358				3726
3439								4222				5376
5283								5874				3293
3070								8296				3363
4275								3677				3628
4230								5360				3609
3029								3511				3772
4510								3704				3585
4024								3930				4939
3570								3500				3710
4887								3774				4293
3717								5139				4279
4873								4787				4584
5013								4468				4197
5438								8001				7524
3746								3520				4235
4779								4337				5572
3347								4038				5817
6385								3193				4318
12396								4033				5074
3481								3741				4114
5151								5234				3398
3223								5991				5001
3746								3842				4611
5619								6390				4948
3863								5619				3728
5770								5324				4518
4275								4478				4892
3457								5273				3681
4174								8397				4549
3129								4380				3731
4141								4289				4548
3850								5243				4120
5635								8127				4004
4468								4408				3712
3506								4137				4122
3512								5147				5368
6626								8029				4250
3809								4056				4250
5930								5833				8511
6480								4537				4182
3443								4466				3593
4190								4076				3452
3366								3673				4728
4610								7263				3426
3689								6521				7950
4536								5293				4548
2928								3865				3615
2943								3992				3642
11509								4223				4234
4130								5611				5287
3320								5518				4755
4708								4435				4056
3494								5150				3645
4100								4992				4969
3627								4560				4653
5132								4597				4534
2921								5786				4364
3180								11590				3850
4650								5443				4190
5671								5217				6381
3905								4433				7119
5824								3941				5637
3956								3354				5205
4004								5258				4856
5776								3779				4636
4463								5325				5204
4103								5780				5396
4863								4501				3757
3688								4429				4953
4815								4098				6315
4942								3684				7290
3628								4875				3519
10575								3780				4071
3035								4187				4342
4749								6399				4756
5818								5160				3719
7165								4282				4007
3461								5365				4769
3722								7205				6362
3660								8908				5802
3315								3468				4741
12284								3395				4779
4011								3642				5213
4381								3605				3782
6892								4642				4520
4410								3926				3577
4409								4964				4477
4308								4113				5105
4657								5596				4780
4241								3684				4514
5716								5734				3871
4964								5618				3570
5425								3374				3189
4163								6613				3889
7649								5104				4307
4219								4001				4049
4868								5914				4280
4638								5535				4172
4957								3801				5099
6766								5013				5751
5174								6582				4460
4151								5067				6240
6885								3601				5125
3095								6068				3803
3315								5519				4455
4315								4013				4328
3645								5471				4059
4801								4145				4246
10660								8593				4889
3433								4461				5558
5547								4237				3707
4171								4631				5421
3917								5753				8609
3148								4259				3800
5076								7890				4861
								5938				3893
								5128				4827
								4583				4678
								4801				7166
								9940				3639
								6056				3753
								6766				3584
								4484				5207
								4028				4974
								4217				6605
								5059				5019
								4597				3648
								4654				4090
								3942				4095
								4155				4279
								4086				5529
								3261				5245
								4233
								4566
								3711
								3298
								3738
								4070
								6718
								4602
								5655
								5223
								3814
								4755
								5253
								3829
								6698
								3822
								4964
								3784
								4413
								4564
								5578
								4895
								6363
								4775
								3612
								4615
								5280
								8595
								5712
								6366
								4037
								10315
								3727
								4661
								3867
								4564
								4490
								11346
								4355
								4847
								4609
								4930
								4049
								9492
								5600
								6106
								3482
								5600
								4247
								4853
								3814
								5503
								4029
								4444
								3854
								4319
								3409
								3529
								4751
								3727
								5094
								4151
								3532
								3832
								4459
								5995
								5222
								5013
								4211
								4414
								5272
								5825
								3623
								5185
								3888
								8578
								5268
								4841
								4070
								4328
								4719
								6385
								4322
								7469
								4578
								4108
								4246
								4676
								9902
								4212
								3324
								7112
								5124
								12436
								6948
								3859
								4126
								3343
								12550
								4474
								4628
								3282
								3418
								5245
								4231
								5853
								5002
								6255
								6837
								4419
								6981
								6074
								5240
								3954
								5641
								4304
								4664
								4099
								4989
								4967
								4347
								3816
								5330
								3522
								3694
								4940
								5017
								4985
								9104
								5351
								7683
								5873
								3476
								5009
								8434
								3570
								4796
								4105
								4165
								3640
								4469
								4467
								5053
								6142
								5095
								7502
								4222
								5129
								10018
								8652
								3664
								4623
								5482
								4345
								11288
								3938
								4625
								4196
								4782
								5737
								5642
								4387
								6466
								4841
								4590
								3735
								4667
								5423
								4408
								4235
								5360
								4811
								7036
								5426
								4243
								5651
								5013
								5488
								3853
								6318
								3387
								5338
								4670
								4337
								4166
								3631
								5310
								11119
								3607
								3617
								3551
								3632
								4441
								19628
								4562
								4802
								8248
								4386
								4187
								4054
								3475
								5355
								6277
								5131
								7568
								4339
								5704
								5074
								5581
								3743
								4179
								4231
								4304
								6855
								4478
								3749
								5247
								4750
								6441
								4780
								3651
								15329
								4219
								4097
								4690
								5698
								4395
								4350
								4460
								4817
								3328
								4523
								4631
								6753
								3714
								7441
								4336
								3917
								3678
								5155
								4826
								4590
								3708
								3936
								4802
								5503
								4628
								8170
								6286
								3577
								5524
								5392
								5358
								4574
								6324
								3722
								4539
								3594
								6521
								4877
								6909
								4610
								3846
								5698
								4028
								5098
								4256
								4283
								4960
								6736
								3890
								3416
								4848
								4354
								3956
								6597
								5361
								5128
								3585
								4587
								5827
								5003
								5978
								5188
								4884
								3628
								9171
								3953
								3970
								4392
								5684
								4452
								3826
								5134
								3884
								5140
								4955
								6220
								3681
								3541
								5310
								5029
								4031
								4513
								4329
								8431
								6307
								6169
								4861
								5305
								4649
								3530
								4552
								5896
								3597
								5533
								4275
								6049
								5656
								5829
								4849
								5012
								5011
								3988
								5031
								6141
								4172
								3824
								4978
								4845
								5523
								3544
								4868
								3554
								3918
								4023
								4466
								7180
								4836
								4924
								4244
								3428
								11662
								4775
								4795
								3804
								4742
								5956
								6195
								3657
								4257
								6272
								3945
								4159
								4364
								6317
								6126
								7574
								4778
								4001
								4305
								4788
								4510
								4838
								3694
								4474
								5820
								5312
								3901
								4795
								5032
								5529
								4135
								4130
								4343
								4253
								3523
								3914
