# Supplementary material for: Membrane-mediated dimerization potentiates PIP5K lipid kinase activity
Source: eLife. 2022 Aug 17;11:e73747. doi: 10.7554/eLife.73747 (PMC9470164; doi:10.7554/eLife.73747)
Supplement: Figure 4—source data 1. [file elife-73747-fig4-data1.xlsx]

## Sheet: Figure 4A
Figure 4A
mNG-PIP5KB elution				mNG-PIP5KB (D51R) elution
mL	mAU			mL	mAU
0	-1.04667			0	6.12
0.03	4.09333			0.03	2.77
0.06	-3.04667			0.06	-3.67
0.1	-1.38667			0.1	-0.4
0.13	10.6133			0.13	-4.82
0.16	-2.62667			0.16	5.06
0.19	-4.75667			0.19	-4.32
0.22	-1.06667			0.22	-6.79
0.26	-0.206667			0.26	-2.44
0.29	-0.196667			0.29	-1.59
0.32	-0.456667			0.32	-1.22
0.35	8.29333			0.35	-2.18
0.39	-2.73667			0.39	-2.28
0.42	-5.08667			0.42	1.27
0.45	-3.96667			0.45	-7.8
0.48	-1.52667			0.48	-5.73
0.51	-2.39667			0.51	-0.43
0.55	-0.286667			0.55	-1.45
0.58	-2.39667			0.58	-2.29
0.61	-5.12667			0.61	1.07
0.64	-0.606667			0.64	8.55
0.67	-4.05667			0.67	0.55
0.71	-4.48667			0.71	2.45
0.74	-3.48667			0.74	-0.47
0.77	-6.96667			0.77	-5.09
0.8	-6.39667			0.8	-6.19
0.83	-5.50667			0.83	-5.91
0.87	-11.2567			0.87	-4.57
0.9	-5.29667			0.9	-4.85
0.93	-5.88667			0.93	-6.72
0.96	1.22333			0.96	-4.54
0.99	6.45333			0.99	-5.17
1.03	-12.3667			1.03	-3.77
1.06	-4.45667			1.06	-3.98
1.09	-2.46667			1.09	-3.13
1.12	-2.29667			1.12	6.57
1.16	-2.42667			1.16	-6.11
1.19	-8.26667			1.19	-1.84
1.22	1.77333			1.22	-5.3
1.25	3.56333			1.25	6.84
1.28	-8.40667			1.28	15.45
1.32	-4.48667			1.32	-7.35
1.35	1.22333			1.35	-4.26
1.38	-0.966667			1.38	-5.64
1.41	-6.22667			1.41	-6.57
1.44	1.52333			1.44	-6.7
1.48	1.34333			1.48	-3.15
1.51	-5.50667			1.51	-0.54
1.54	-4.51667			1.54	-14.53
1.57	-4.88667			1.57	-15.36
1.6	-5.67667			1.6	-7.64
1.64	-4.98667			1.64	-4.33
1.67	-4.82667			1.67	-5.45
1.7	-7.49667			1.7	-4.58
1.73	-7.71667			1.73	0.97
1.76	-5.55667			1.76	-6.55
1.8	-5.52667			1.8	-7.83
1.83	-3.63667			1.83	-4.36
1.86	-9.00667			1.86	-5.1
1.89	-6.29667			1.89	-6.2
1.93	-6.10667			1.93	-7.32
1.96	-10.7967			1.96	-6.44
1.99	-6.35667			1.99	-4.04
2.02	-3.32667			2.02	-13.25
2.05	-1.20667			2.05	-7.37
2.09	-0.886667			2.09	-1.81
2.12	-11.0567			2.12	-8.23
2.15	-6.06667			2.15	-5.55
2.18	-3.90667			2.18	-3.8
2.21	-3.68667			2.21	8.57
2.25	1.88333			2.25	-6.32
2.28	-4.63667			2.28	-5.06
2.31	-3.66667			2.31	-5
2.34	12.6033			2.34	-1.1
2.37	-9.80667			2.37	6.75
2.41	-4.66667			2.41	-12.37
2.44	-0.416667			2.44	-7.25
2.47	-4.59667			2.47	-5.1
2.5	-6.56667			2.5	-6.64
2.54	-1.88667			2.54	-7.03
2.57	-0.406667			2.57	-4.49
2.6	-4.39667			2.6	-1
2.63	-3.28667			2.63	-6.56
2.66	-3.78667			2.66	-19.07
2.7	-4.18667			2.7	-7.44
2.73	-5.15667			2.73	-4.65
2.76	-5.08667			2.76	-5.9
2.79	-6.33667			2.79	-6.7
2.82	-5.35667			2.82	-2.41
2.86	-9.91667			2.86	-8.65
2.89	-9.58667			2.89	-6.81
2.92	-5.92667			2.92	-4.7
2.95	-6.06667			2.95	-6.37
2.98	-5.09667			2.98	-7.45
3.02	-6.29667			3.02	-6.92
3.05	1.03333			3.05	-7.92
3.08	-8.55667			3.08	-9.18
3.11	-7.48667			3.11	-7.49
3.14	-6.06667			3.14	-8.18
3.18	10.5633			3.18	-8.17
3.21	-3.02667			3.21	-7.71
3.24	-9.68667			3.24	-4.44
3.27	-5.23667			3.27	-11.34
3.31	-9.96667			3.31	-9.59
3.34	-0.956667			3.34	-6.59
3.37	-3.23667			3.37	-8.85
3.4	-5.95667			3.4	-7.06
3.43	10.0033			3.43	-6.3
3.47	-14.0267			3.47	-6.56
3.5	-7.82667			3.5	-4.8
3.53	-4.97667			3.53	-9.61
3.56	1.95333			3.56	-5.98
3.59	-7.89667			3.59	-6.18
3.63	-2.98667			3.63	-7.82
3.66	-0.696667			3.66	-10.9
3.69	-6.47667			3.69	-4.53
3.72	-10.0167			3.72	-4.35
3.75	-8.28667			3.75	-22.28
3.79	-8.56667			3.79	-9.37
3.82	-7.03667			3.82	-10.2
3.85	-10.3267			3.85	-9.52
3.88	-9.23667			3.88	-7.53
3.91	-8.03667			3.91	-8.19
3.95	-7.40667			3.95	-3.95
3.98	-6.00667			3.98	-8.98
4.01	-6.67667			4.01	-10.67
4.04	-7.31667			4.04	2.64
4.08	-8.37667			4.08	-7.36
4.11	-5.43667			4.11	-8.83
4.14	-4.01667			4.14	-9.46
4.17	-8.47667			4.17	-9.22
4.2	-6.41667			4.2	-8.84
4.24	-9.86667			4.24	-10.5
4.27	2.37333			4.27	-5.4
4.3	1.74333			4.3	-4.78
4.33	-21.5167			4.33	-8.56
4.36	-6.33667			4.36	-8.9
4.4	-7.74667			4.4	-8.44
4.43	-5.41667			4.43	-7.89
4.46	-5.98667			4.46	-8.08
4.49	-5.46667			4.49	-9.1
4.52	-1.54667			4.52	-6.9
4.56	-10.8567			4.56	-1.76
4.59	-19.6267			4.59	0.97
4.62	-7.64667			4.62	-13.38
4.65	-8.09667			4.65	-4.94
4.69	-7.69667			4.69	-7.83
4.72	-9.86667			4.72	-9.56
4.75	-1.80667			4.75	-7.82
4.78	-8.80667			4.78	-7.55
4.81	-8.92667			4.81	-6.1
4.85	-9.82667			4.85	-16.93
4.88	-10.5267			4.88	-21.57
4.91	-12.8767			4.91	-10.97
4.94	-11.0467			4.94	-11.31
4.97	-8.33667			4.97	-8.75
5.01	-0.246667			5.01	-7.74
5.04	-13.8967			5.04	-6.68
5.07	-6.43667			5.07	-7.92
5.1	-7.11667			5.1	-3.85
5.13	-8.83667			5.13	-5.66
5.17	-8.98667			5.17	-5.84
5.2	-7.05667			5.2	-7.94
5.23	-2.79667			5.23	-7.31
5.26	-9.42667			5.26	-7.59
5.29	-7.41667			5.29	-7.95
5.33	-7.20667			5.33	-15.34
5.36	-7.11667			5.36	-6.84
5.39	16.5333			5.39	-7.9
5.42	-13.7967			5.42	-6.81
5.46	-12.2867			5.46	-9.88
5.49	-7.35667			5.49	-6.61
5.52	-9.04667			5.52	4.45
5.55	-8.92667			5.55	-8.05
5.58	-7.91667			5.58	-8.63
5.62	-7.89667			5.62	-9.14
5.65	2.18333			5.65	-10.74
5.68	-18.7567			5.68	12.23
5.71	-10.4667			5.71	-9.44
5.74	-6.93667			5.74	-8.31
5.78	-8.25667			5.78	-9.03
5.81	-9.01667			5.81	-10.26
5.84	-6.77667			5.84	-6.85
5.87	-6.21667			5.87	-8.68
5.9	-11.2967			5.9	-13.25
5.94	-11.7367			5.94	-6.02
5.97	-8.98667			5.97	-17.45
6	-9.51667			6	-9.23
6.03	-13.8967			6.03	-9.88
6.07	-10.9767			6.07	-9.41
6.1	-11.1867			6.1	-4.71
6.13	-6.54667			6.13	-9.23
6.16	-8.49667			6.16	-9.62
6.19	-12.6667			6.19	-7.86
6.23	-5.53667			6.23	-8.08
6.26	-10.4667			6.26	-11.16
6.29	-9.17667			6.29	-2.91
6.32	-9.71667			6.32	-11.79
6.35	-7.59667			6.35	-12.2
6.39	-11.3667			6.39	-8.62
6.42	-9.90667			6.42	-17.42
6.45	-8.51667			6.45	0.05
6.48	-10.4967			6.48	-7.31
6.51	-6.22667			6.51	-10.68
6.55	-13.0767			6.55	-9.91
6.58	-11.1167			6.58	-1.81
6.61	-11.3767			6.61	-4.04
6.64	-10.8167			6.64	-3.77
6.67	-11.3067			6.67	-7.33
6.71	-9.57667			6.71	-8.48
6.74	5.90333			6.74	-7.58
6.77	-18.8467			6.77	-0.23
6.8	-17.2067			6.8	-3.54
6.84	-5.08667			6.84	-10.62
6.87	-10.7967			6.87	-9.81
6.9	-11.6567			6.9	-10.9
6.93	-9.28667			6.93	-12.29
6.96	-9.53667			6.96	-10.61
7	-12.7267			7	-6.67
7.03	-8.86667			7.03	-7.89
7.06	-13.1367			7.06	-21.68
7.09	-13.0367			7.09	-8.91
7.12	-5.10667			7.12	-8.55
7.16	2.28333			7.16	-8.12
7.19	-9.86667			7.19	-5.59
7.22	-5.86667			7.22	-4.4
7.25	-13.6867			7.25	-5.73
7.28	-7.88667			7.28	-4.75
7.32	-10.6867			7.32	-8.82
7.35	-10.0667			7.35	-6.8
7.38	-14.7467			7.38	1.18
7.41	-4.99667			7.41	-7.45
7.44	13.0533			7.44	-8.26
7.48	-9.69667			7.48	-7.23
7.51	-10.2567			7.51	-9.97
7.54	-7.67667			7.54	-8.2
7.57	-6.84667			7.57	-2.44
7.61	7.05333			7.61	-6.74
7.64	-14.0367			7.64	-8.7
7.67	-6.76667			7.67	-5.45
7.7	-9.20667			7.7	5.55
7.73	-6.39667			7.73	-1.61
7.77	-13.0167			7.77	-6.42
7.8	-15.6967			7.8	-9.15
7.83	-3.92667			7.83	-7.21
7.86	-13.9867			7.86	-1.66
7.89	-18.0167			7.89	11.59
7.93	-10.2267			7.93	-19.41
7.96	-5.64667			7.96	-9.47
7.99	-11.5167			7.99	-8.04
8.02	-11.7067			8.02	-9.74
8.05	-5.78667			8.05	-6.95
8.09	-10.3967			8.09	1.4
8.12	-8.05667			8.12	6.19
8.15	-7.69667			8.15	5.79
8.18	-2.99667			8.18	-18.66
8.22	-7.25667			8.22	-2.75
8.25	-0.346667			8.25	-2.73
8.28	-0.966667			8.28	-3.98
8.31	-0.726667			8.31	-6.29
8.34	-10.1767			8.34	-2.65
8.38	1.23333			8.38	0.35
8.41	1.68333			8.41	-2.25
8.44	0.423333			8.44	-4.09
8.47	5.49333			8.47	0.08
8.5	3.50333			8.5	-0.82
8.54	11.8333			8.54	0.38
8.57	9.45333			8.57	0.41
8.6	5.49333			8.6	6.17
8.63	6.26333			8.63	-1.33
8.66	12.3533			8.66	-1.57
8.7	21.9133			8.7	-2.39
8.73	3.40333			8.73	-1.72
8.76	8.31333			8.76	-0.47
8.79	11.9733			8.79	-1.36
8.82	11.7233			8.82	4.65
8.86	8.21333			8.86	1.16
8.89	14.4433			8.89	-3.45
8.92	9.65333			8.92	1.05
8.95	11.8733			8.95	-0.65
8.99	-4.28667			8.99	9.83
9.02	6.19333			9.02	-5.12
9.05	7.76333			9.05	-7.01
9.08	11.9433			9.08	-2.76
9.11	9.98333			9.11	1.69
9.15	13.2933			9.15	1.18
9.18	11.2833			9.18	1.91
9.21	9.05333			9.21	1.71
9.24	10.4633			9.24	10.9
9.27	15.5333			9.27	-11.93
9.31	13.1633			9.31	1.36
9.34	13.5033			9.34	1.97
9.37	15.2233			9.37	0.91
9.4	13.0133			9.4	1.81
9.43	7.12333			9.43	-1.1
9.47	15.4333			9.47	0.97
9.5	14.2133			9.5	-5.16
9.53	14.4033			9.53	-1.93
9.56	15.3733			9.56	-2.51
9.59	13.6933			9.59	-0.27
9.63	19.8733			9.63	-0.62
9.66	21.1733			9.66	-0.02
9.69	15.2433			9.69	0.31
9.72	14.5633			9.72	-3.65
9.76	16.5633			9.76	4.5
9.79	27.0633			9.79	0.39
9.82	24.7833			9.82	-2.73
9.85	14.4633			9.85	-3.8
9.88	18.7033			9.88	0.95
9.92	15.1133			9.92	6.19
9.95	13.5733			9.95	-0.56
9.98	13.8533			9.98	-1.17
10.01	11.9733			10.01	-2.29
10.04	14.2633			10.04	-2.78
10.08	3.65333			10.08	9.87
10.11	11.0133			10.11	8.47
10.14	13.4533			10.14	-9.98
10.17	16.0733			10.17	3.88
10.2	14.9533			10.2	2.11
10.24	16.4033			10.24	1.67
10.27	14.4733			10.27	1.76
10.3	14.8333			10.3	1.86
10.33	13.2933			10.33	25.91
10.37	16.5633			10.37	-1.59
10.4	12.8233			10.4	-4.83
10.43	18.0933			10.43	0.48
10.46	14.7733			10.46	4.85
10.49	14.0833			10.49	2.87
10.53	13.3033			10.53	-0.19
10.56	12.2033			10.56	3.63
10.59	13.6633			10.59	5.71
10.62	21.7333			10.62	-2.82
10.65	17.9333			10.65	-0.95
10.69	19.2233			10.69	3.99
10.72	23.2033			10.72	0.31
10.75	28.8333			10.75	0.36
10.78	22.5333			10.78	2.58
10.81	24.2033			10.81	5.22
10.85	31.4533			10.85	1.81
10.88	30.0033			10.88	2.93
10.91	52.1033			10.91	1.5
10.94	39.8333			10.94	-0.02
10.97	40.8433			10.97	-1.12
11.01	44.7133			11.01	-0.65
11.04	52.3933			11.04	-7.5
11.07	58.4733			11.07	-0.34
11.1	69.9933			11.1	1.26
11.14	82.8333			11.14	1.92
11.17	91.3233			11.17	4.42
11.2	79.3333			11.2	9.75
11.23	112.443			11.23	-7.29
11.26	114.403			11.26	0.27
11.3	128.843			11.3	6.59
11.33	145.273			11.33	0.51
11.36	155.783			11.36	3.46
11.39	169.293			11.39	6.48
11.42	181.843			11.42	6.53
11.46	194.153			11.46	-4.27
11.49	199.653			11.49	-6.54
11.52	218.193			11.52	3
11.55	233.263			11.55	3.52
11.58	249.273			11.58	7.62
11.62	267.823			11.62	4.02
11.65	272.303			11.65	3.44
11.68	297.793			11.68	5.1
11.71	304.253			11.71	0.89
11.74	313.553			11.74	0.62
11.78	345.483			11.78	0.56
11.81	359.573			11.81	3.48
11.84	454.973			11.84	0.72
11.87	386.263			11.87	0.83
11.91	404.633			11.91	2.25
11.94	417.423			11.94	3.19
11.97	443.133			11.97	2.25
12.03	456.053			12	2.92
12.07	558.153			12.03	-4.74
12.1	473.213			12.07	-0.79
12.13	489.563			12.1	2.08
12.16	501.133			12.13	-1.2
12.19	508.013			12.16	-0.75
12.23	520.513			12.19	0.82
12.26	556.153			12.23	1.51
12.29	489.013			12.26	-1.63
12.32	504.253			12.29	1.11
12.35	511.263			12.32	-6.25
12.39	500.673			12.35	-4.82
12.42	511.733			12.39	2.16
12.48	493.643			12.42	3.75
12.52	494.293			12.45	3.26
12.55	487.773			12.48	4.42
12.58	481.933			12.52	13.86
12.61	461.613			12.55	23.17
12.64	465.873			12.58	-3.43
12.68	497.753			12.61	9.92
12.71	443.423			12.64	15.39
12.74	410.503			12.68	16.64
12.77	426.943			12.71	24.89
12.8	413.273			12.74	24.51
12.84	408.143			12.77	32.77
12.87	396.083			12.8	49.16
12.9	386.273			12.84	71.88
12.93	385.903			12.87	88.24
12.96	372.223			12.9	111.17
13	364.853			12.93	133.3
13.03	354.743			12.96	169.46
13.06	351.443			13	240.32
13.09	349.923			13.03	264.66
13.12	347.033			13.06	289.36
13.16	316.153			13.09	325.4
13.19	315.673			13.12	364.72
13.22	342.733			13.16	392.78
13.25	295.343			13.19	422.04
13.29	288.133			13.22	471.11
13.32	285.853			13.25	496.51
13.35	273.963			13.29	546.16
13.38	262.703			13.32	539.51
13.41	243.723			13.35	551.47
13.45	247.293			13.38	593.01
13.48	240.923			13.41	590.57
13.51	234.633			13.45	549.72
13.54	229.343			13.48	614.5
13.57	227.703			13.51	582.72
13.61	215.573			13.54	569.29
13.64	200.453			13.57	560.28
13.67	206.113			13.61	645.75
13.7	199.183			13.67	578.45
13.73	190.503			13.7	536.86
13.77	193.343			13.73	520.27
13.8	181.233			13.77	503.75
13.83	164.553			13.8	491.62
13.86	171.173			13.83	483.64
13.9	168.143			13.86	472.78
13.93	157.973			13.9	455.09
13.96	159.943			13.93	428.02
13.99	150.083			13.96	405.39
14.02	149.233			13.99	403.64
14.06	139.103			14.02	459.08
14.09	133.573			14.06	367.02
14.12	128.423			14.09	372.9
14.15	123.543			14.12	343.7
14.18	124.693			14.15	331.43
14.22	132.073			14.18	314.81
14.25	108.363			14.22	300.87
14.28	112.213			14.25	305.55
14.31	113.153			14.28	286.45
14.34	110.143			14.31	273.74
14.38	106.463			14.34	264.3
14.41	101.993			14.38	245.56
14.44	106.143			14.41	233.3
14.47	107.933			14.44	231.16
14.5	71.2533			14.47	223.56
14.54	94.4833			14.5	212.04
14.57	91.2233			14.54	179.03
14.6	82.2833			14.57	182.38
14.63	99.2633			14.6	181.29
14.67	81.3233			14.63	175.52
14.7	76.2833			14.67	170.51
14.73	73.3433			14.7	164.34
14.76	75.6433			14.73	175.35
14.79	70.8833			14.76	168.18
14.83	70.1733			14.79	131.4
14.86	72.5033			14.83	140.48
14.89	64.8533			14.86	131.45
14.92	69.0433			14.89	133.5
14.95	64.8933			14.92	122.34
14.99	61.5433			14.95	117.97
15.02	59.9533			14.99	114.5
15.05	57.4233			15.02	103.69
15.08	56.5533			15.05	105.57
15.11	56.3133			15.08	106.12
15.15	61.0133			15.11	95.56
15.18	54.1733			15.15	94.15
15.21	50.4233			15.18	94.34
15.24	50.0333			15.21	105.75
15.27	60.8933			15.24	83.72
15.31	61.9533			15.27	87.05
15.34	49.5933			15.31	82.62
15.37	40.6433			15.34	78.85
15.4	46.2433			15.37	77.94
15.44	48.3133			15.4	76.54
15.47	43.7433			15.44	73.1
15.5	44.5333			15.47	72.31
15.53	50.6133			15.5	70.2
15.56	62.4333			15.53	65.09
15.6	28.3733			15.56	65.96
15.63	48.0133			15.6	73.3
15.66	43.3133			15.63	50.59
15.69	38.8233			15.66	53.33
15.72	41.5133			15.69	67.81
15.76	43.1133			15.72	58.06
15.79	36.4533			15.76	54.75
15.82	33.1233			15.79	55.41
15.85	34.5033			15.82	67.75
15.88	38.2233			15.85	69.95
15.92	36.2433			15.88	44.06
15.95	35.3733			15.92	53.06
15.98	35.2533			15.95	51.63
16.01	42.9433			15.98	46.85
16.05	31.1433			16.01	50.17
16.08	32.6433			16.05	46.39
16.11	29.3633			16.08	41.7
16.14	32.0633			16.11	40.05
16.17	28.0633			16.14	41.27
16.21	25.3933			16.17	40.43
16.24	30.9133			16.21	43.02
16.27	25.2033			16.24	41.61
16.3	24.2333			16.27	39.5
16.33	25.7033			16.3	49.57
16.37	22.9733			16.33	37.5
16.4	30.4833			16.37	35.99
16.43	22.5333			16.4	36.88
16.46	16.9733			16.43	44.87
16.49	26.0433			16.46	35.47
16.53	22.7133			16.49	36.31
16.56	21.4333			16.53	33.33
16.59	19.0733			16.56	34.41
16.62	30.0433			16.59	22.43
16.65	38.1233			16.62	31.57
16.69	20.8033			16.65	31.7
16.72	11.8033			16.69	35.56
16.75	20.2633			16.72	25.17
16.78	19.0033			16.75	13.85
16.82	32.2033			16.78	31.94
16.85	19.3133			16.82	30.6
16.88	18.2633			16.85	26.96
16.91	16.8233			16.88	25.57
16.94	13.9133			16.91	27.43
16.98	21.1133			16.94	52.8
17.01	17.3533			16.98	21.08
17.04	16.9533			17.01	18.52
17.07	15.8533			17.04	22.85
17.1	18.3033			17.07	22.96
17.14	20.4833			17.1	27.9
17.17	12.5833			17.14	20.71
17.2	12.0333			17.17	21.24
17.23	15.0133			17.2	16.63
17.26	13.6633			17.23	16.35
17.3	13.9633			17.26	18.78
17.33	18.3233			17.3	22.05
17.36	16.5933			17.33	21.75
17.39	15.5933			17.36	16.91
17.42	12.4833			17.39	23.36
17.46	16.1733			17.42	17.67
17.49	14.7333			17.46	19.77
17.52	13.2533			17.49	19.23
17.55	7.39333			17.52	19.08
17.59	13.4233			17.55	16.84
17.62	14.1733			17.59	24.05
17.65	15.8833			17.62	21.3
17.68	13.8933			17.65	17.55
17.71	14.6733			17.68	16.64
17.75	21.7433			17.71	16.7
17.78	29.8833			17.75	16.89
17.81	2.43333			17.78	14.4
17.84	11.6033			17.81	10.08
17.87	13.9833			17.84	12.06
17.91	12.7233			17.87	16.26
17.94	24.3433			17.91	17.38
17.97	10.8733			17.94	15.26
18	11.0633			17.97	13.11
18.03	3.56333			18	13.92
18.07	12.4333			18.03	23.55
18.1	12.0633			18.07	23.8
18.13	10.3533			18.1	11.93
18.16	7.05333			18.13	22.55
18.2	7.69333			18.16	18.36
18.23	11.2033			18.2	22.31
18.26	7.59333			18.23	25.46
18.29	11.1233			18.26	29.64
18.32	17.5333			18.29	34.71
18.36	13.9633			18.32	33.98
18.39	18.1733			18.36	35.91
18.42	28.7633			18.39	39.96
18.45	27.7633			18.42	38.25
18.48	30.9133			18.45	41.19
18.52	32.8033			18.48	40.08
18.55	40.9333			18.52	45.77
18.58	47.5933			18.55	44.89
18.61	36.0433			18.58	56.38
18.64	31.0033			18.61	49
18.68	36.6433			18.64	53
18.71	44.5533			18.68	57.21
18.74	44.3433			18.71	54.93
18.77	44.6233			18.74	53.8
18.8	40.8333			18.77	60.82
18.84	54.9833			18.8	50.34
18.87	70.6833			18.84	60.9
18.9	34.5033			18.87	71.16
18.93	47.7233			18.9	63.79
18.97	50.0033			18.93	53.73
19	54.8533			18.97	55.55
19.03	60.9733			19	61.58
19.06	59.4033			19.03	64.54
19.09	65.0033			19.06	59.43
19.13	56.9533			19.09	63.54
19.16	68.3133			19.13	69.93
19.19	72.0333			19.16	87.58
19.22	72.8733			19.19	51.11
19.25	72.4033			19.22	57.79
19.29	70.8833			19.25	61.16
19.32	81.1433			19.29	60.67
19.35	77.7233			19.32	61.66
19.38	81.9533			19.35	63.27
19.41	85.5233			19.38	70.69
19.45	79.3733			19.41	67.16
19.48	81.6533			19.45	70.03
19.51	87.2033			19.48	71.84
19.54	93.9433			19.51	76.97
19.57	87.1433			19.54	78.32
19.61	84.5933			19.57	77.09
19.64	88.1033			19.61	103.91
19.67	92.0833			19.64	86.06
19.7	88.4133			19.67	83.6
19.74	91.8733			19.7	90.41
19.77	79.4933			19.74	87.5
19.8	89.8433			19.77	83.63
19.83	97.2733			19.8	90.91
19.86	91.0733			19.83	91.02
19.9	95.0033			19.86	87.18
19.93	101.393			19.9	91.28
19.96	124.143			19.93	91.82
19.99	100.403			19.96	91.96
20.02	103.293			19.99	95.32
20.06	99.1233			20.02	85.14
20.09	100.233			20.06	77.29
20.12	104.313			20.09	94.99
20.15	105.003			20.12	92.52
20.18	100.093			20.15	91.81
20.22	96.3033			20.18	86.1
20.25	94.4533			20.22	93.06
20.28	93.6633			20.25	102.72
20.31	93.5733			20.28	86.25
20.35	91.1633			20.31	83.26
20.38	90.7933			20.35	80.36
20.41	92.2833			20.38	83.04
20.44	89.0433			20.41	77.94
20.47	82.2433			20.44	75.09
20.51	78.4333			20.47	77.34
20.54	73.5133			20.51	71.39
20.57	75.3033			20.54	67.78
20.6	73.9533			20.57	62.96
20.63	65.8233			20.6	64.21
20.67	61.3433			20.63	57.4
20.7	57.1033			20.67	58.48
20.73	56.1633			20.7	68.97
20.76	64.1733			20.73	57.53
20.79	58.1233			20.76	54.27
20.83	50.5533			20.79	54.15
20.86	45.2233			20.83	51.05
20.89	46.0533			20.86	50.07
20.92	47.9933			20.89	54.37
20.95	44.0633			20.92	48.81
20.99	43.5433			20.95	45.93
21.02	40.5933			20.99	41.23
21.05	62.2333			21.02	44.24
21.08	51.4733			21.05	44.42
21.12	25.4533			21.08	43.83
21.15	32.0533			21.12	51.85
21.18	32.2433			21.15	28.29
21.21	30.6133			21.18	34.75
21.24	25.0233			21.21	31.97
21.28	21.8433			21.24	29.32
21.31	19.0333			21.28	27.63
21.34	18.3233			21.31	26.54
21.37	21.9433			21.34	31.16
21.4	18.5733			21.37	32.13
21.44	15.6533			21.4	22.87
21.47	15.5633			21.44	20.03
21.5	17.3633			21.47	21.55
21.53	17.1633			21.5	20.23
21.56	15.1133			21.53	17.49
21.6	12.4133			21.56	18.13
21.63	10.3933			21.6	27.2
21.66	9.93333			21.63	12.45
21.69	9.67333			21.66	15.09
21.73	10.2033			21.69	14.96
21.76	12.9633			21.73	12.46
21.79	10.4733			21.76	14.82
21.82	4.15333			21.79	17.03
21.85	12.4533			21.82	16.52
21.89	19.2733			21.85	14.57
21.92	6.26333			21.89	17.5
21.95	5.09333			21.92	12.47
21.98	0.973333			21.95	12.28
22.01	11.3933			21.98	17.87
22.05	8.53333			22.01	11.95
22.08	7.75333			22.05	11.69
22.11	7.43333			22.08	6.41
22.14	9.82333			22.11	8.93
22.17	20.5633			22.14	14
22.21	6.33333			22.17	11.5
22.24	5.98333			22.21	17.39
22.27	5.95333			22.24	4.68
22.3	6.16333			22.27	-1.02
22.33	5.37333			22.3	16.4
22.37	7.51333			22.33	8.52
22.4	6.09333			22.37	9.83
22.43	1.18333			22.4	8.53
22.46	6.82333			22.43	17.32
22.5	6.04333			22.46	40.95
22.53	15.7433			22.5	7.11
22.56	7.64333			22.53	8.22
22.59	5.36333			22.56	10.88
22.62	17.4133			22.59	9.44
22.66	5.67333			22.62	11.03
22.69	5.28333			22.66	7.87
22.72	7.83333			22.69	20.19
22.75	14.4133			22.72	10.44
22.78	7.22333			22.75	10.89
22.82	6.31333			22.78	8.94
22.85	5.11333			22.82	8.34
22.88	6.46333			22.85	8.21
22.91	-0.566667			22.88	6.98
22.94	5.30333			22.91	7.94
22.98	7.82333			22.94	8
23.01	8.79333			22.98	6.29
23.04	1.86333			23.01	9.08
23.07	-9.58667			23.04	7.36
23.1	6.02333			23.07	5.42
23.14	9.63333			23.1	13.64
23.17	5.05333			23.14	8.33
23.2	4.14333			23.17	6.55
23.23	6.25333			23.2	-2.16
23.27	23.1733			23.23	9.12
23.3	5.46333			23.27	15.38
23.33	1.31333			23.3	16.43
23.36	2.59333			23.33	17.38
23.39	4.78333			23.36	3.25
23.43	0.513333			23.39	5.99
23.46	4.36333			23.43	5.52
23.49	3.05333			23.46	3.48
23.52	7.21333			23.49	6
23.55	3.87333			23.52	6.42
23.59	1.82333			23.55	14.2
23.62	1.29333			23.59	6.72
23.65	4.71333			23.62	2.14
23.68	3.49333			23.65	7.8
23.71	10.9033			23.68	6.31
23.75	6.20333			23.71	3.76
23.78	2.27333			23.75	6.2
23.81	1.15333			23.78	14.23
23.84	0.693333			23.81	5.85
23.88	-0.0766667			23.84	2.56
23.91	2.95333			23.88	4.04
23.94	3.84333			23.91	6.76
23.97	2.42333			23.94	5.63
24	1.67333			23.97	4.43
