# Supplementary material for: Membrane-mediated dimerization potentiates PIP5K lipid kinase activity
Source: eLife. 2022 Aug 17;11:e73747. doi: 10.7554/eLife.73747 (PMC9470164; doi:10.7554/eLife.73747)
Supplement: Figure 4—source data 2. [file elife-73747-fig4-data2.xlsx]

## Sheet: Figure 4C
Figure 4C
mNG-5KB single particle intensity (AU)	Fluorescence Intensity (AU) Bin Center	Frequency
4405	0	0
5449	400	0
5857	800	0
5068	1200	0
5268	1600	0
6571	2000	0
5398	2400	0
4362	2800	0.00247525
3996	3200	0.029703
4611	3600	0.0886964
4478	4000	0.148927
5995	4400	0.17863
6563	4800	0.179043
4721	5200	0.161716
4703	5600	0.10396
4079	6000	0.0598185
6515	6400	0.0305281
3306	6800	0.00907591
5564	7200	0.0049505
3655	7600	0.000825083
4715	8000	0.000412541
4136	8400	0.000412541
4557	8800	0
6688	9200	0.000412541
5855	9600	0.000412541
4330	10000	0
5727	10400	0
4862	10800	0
4909	11200	0
3542	11600	0
5870	12000	0
4540	12400	0
3299	12800	0
4678	13200	0
6141	13600	0
6800	14000	0
5211	14400	0
4400	14800	0
4542	15200	0
4412	15600	0
5410	16000	0
5422	16400	0
4988
3924
3482
4559
4120
4099
4310
4738
4835
3822
4174
4301
4253
6240
4804
5596
3910
5205
5297
4042
4281
4468
4177
4570
5175
5026
5253
4639
5101
5367
4953
4043
4260
5027
3255
4231
4696
4048
5784
4799
3481
4552
4759
4010
5025
4665
4984
4367
4372
3874
6168
4380
4905
6391
3344
4557
4150
4985
5487
5108
5238
5397
3626
5163
4046
4463
4585
3879
6124
5182
5219
4091
4599
5188
3646
4785
4063
5641
5906
4719
4753
4978
3851
4367
6568
3565
5751
6321
4004
4480
5319
5869
4605
4418
4129
5289
3731
5067
6030
5378
3518
2894
3213
4726
4560
4922
4163
6014
4258
4206
3740
4318
4160
3813
4683
6361
3523
4635
4860
5009
4518
4564
4849
5047
5663
4716
4296
3723
5008
5957
4195
5410
4671
7655
6213
3782
5847
4422
5096
3965
5011
4858
4402
5541
3751
5284
5741
5205
4301
3963
4458
5260
5312
4126
4754
5553
5866
4032
6291
5783
6511
4291
3683
5464
3419
5918
4839
4694
6019
5765
5291
4159
5774
4761
4678
5563
4330
3270
4570
5783
6829
4889
5318
4192
4067
4303
4960
4414
6785
4817
4967
5281
5472
4917
3561
3902
6278
4940
4997
4452
4939
4901
4372
4511
3546
5398
4090
4059
4844
5102
3899
4082
4275
4673
6471
3751
4667
5851
3676
3750
6635
4199
4257
4967
5952
5389
4806
4596
4825
5673
3771
4963
5366
4960
6348
5000
4701
6553
5465
3989
3676
4830
4545
3234
4410
5176
4365
5266
4910
4168
4684
5304
4616
4182
3757
5524
4119
5040
4155
4537
3826
3654
4881
4147
4597
4358
4576
5299
4153
3228
5925
5405
3818
4962
3631
4343
4821
4010
5447
5044
5154
3848
2875
4815
5035
3756
4198
4221
5111
5378
5037
6181
5384
6031
4370
3730
4020
5225
3492
6188
4417
4427
4484
5951
4751
5127
5795
5665
4901
4511
4016
4934
5994
5256
4751
5576
4353
5700
5761
4079
4410
4843
3729
5108
3763
3707
5224
4878
3982
4407
8301
4676
3158
3357
4895
4656
4007
5035
5447
4843
3515
4579
5049
4480
3351
5570
4294
3934
5376
5684
5947
5250
5088
4757
5746
4751
3913
5142
5342
3842
4304
4506
3162
4185
5466
3461
4445
5532
5317
5549
5198
5392
4793
4551
3568
4853
4213
3940
3578
4384
6200
5965
4942
5668
5594
4540
3655
6369
4056
4578
3902
6255
4003
4534
3754
5247
3620
5509
6182
3439
5262
4020
3603
4210
6563
5519
4141
4641
5627
4270
4774
4907
5358
5637
6933
4317
4038
4120
5856
5476
4100
5135
4302
5434
4335
5209
4085
9553
3861
4431
3817
3970
4501
6983
5127
4905
5305
4354
4126
3489
5301
5829
5280
3540
3739
4715
6100
5607
5085
5413
4523
6001
5263
4331
5437
4257
4354
4028
4640
3901
5698
4102
4462
5493
3633
5546
4919
4774
4260
5132
5164
4670
3588
5134
5110
3831
3222
6070
4608
5241
5344
6030
3687
5628
4757
3942
4738
5216
4105
4527
5510
5775
4223
4520
4747
4276
4470
4656
5454
5464
3885
3325
4134
5740
6146
6861
4236
4654
5415
4461
3542
4564
6358
4746
5090
3476
3779
3856
4541
5411
7382
3959
3909
5041
6018
5210
6114
3879
5079
3986
4592
3796
4127
3674
3750
7089
5118
4901
5429
5261
4048
5441
5360
4848
5067
4618
2985
3591
4836
5731
3359
5201
5262
5946
4463
3946
4515
4009
5519
5227
4411
5358
5108
3199
4451
3938
4749
4930
5011
5542
5412
4346
4345
5068
5609
6071
5046
5109
4369
4854
5308
5236
4729
5224
5251
4575
4691
5440
6315
3877
4313
5850
5575
5737
5107
4466
5101
4616
5185
4266
5829
3497
4825
5974
4213
5905
7059
5902
5548
5243
4687
5902
4796
5841
3963
3683
4097
6363
4421
5070
4603
4165
6104
4750
4019
4778
5302
3860
5150
5328
5208
4224
4612
4006
4212
5892
4675
4096
5876
4813
6575
4183
4915
5060
4653
5452
5534
4086
5073
3735
5168
5335
6981
4549
4570
4245
4895
4644
4215
3932
4126
4400
6189
5093
4939
4752
5755
3292
3595
4636
5972
6220
4534
4670
5487
5458
5249
4506
4672
4456
3894
4650
4394
5354
5364
4363
4271
4288
4645
6194
3634
4204
5975
5054
3861
4764
6155
3456
4914
3036
5442
4193
4964
3896
5696
4820
3606
3317
4712
4934
4673
3644
4071
4480
4064
4830
3910
5496
3927
3612
4143
5000
4318
5430
3665
4391
4196
3448
5047
4332
3798
5800
4474
5607
6149
4104
4734
4111
4816
4540
4788
5034
5421
4315
5324
5197
3856
6415
4319
4629
3881
4333
4346
4705
5929
4690
4668
4105
5788
4959
4201
3794
5557
5595
4091
5321
5488
4101
4133
5160
3794
4578
4286
4381
5404
4848
4689
5867
5210
4838
4645
5773
5077
4240
4966
4545
4689
3946
5425
3320
3801
3801
5571
3772
5126
4211
3510
5119
3858
4040
3103
5060
4708
6112
5319
5358
3970
4662
6240
4393
4471
5470
5167
4008
4522
4050
4785
5163
5339
6309
4469
5467
4233
4008
4748
5542
6060
5494
5443
5906
4189
4621
3318
4062
3997
5997
5350
4149
3494
4785
5388
5339
4175
3376
4290
4893
4733
5013
4325
5749
3953
5517
4004
3646
3770
4091
4618
4361
5274
4581
3902
4460
4989
4662
4489
3654
3233
4452
4101
6253
5165
4906
6492
4835
4895
5300
4437
5684
4465
4445
4552
4808
5208
6249
6071
4895
4735
4429
5520
5180
4258
4824
5674
5273
3450
3792
4063
4335
3982
4519
3872
4716
4340
4699
4832
4475
4439
4712
4540
3841
5072
4033
3542
5518
4100
3682
5518
3607
3828
3785
4395
3774
4144
4124
4666
5482
4581
4074
3516
4960
5619
4047
5671
3836
3017
5100
4980
4917
7051
4399
3572
4527
3361
3954
4293
6652
5348
4714
5234
3521
4757
4591
5262
5206
4105
3303
4646
6232
5734
3905
4830
3542
3850
4758
4895
6009
5203
4353
4126
3896
3693
5099
6205
3686
3909
4187
5199
4616
5037
5466
4613
3739
5939
5129
4520
4808
5618
4649
4994
4052
5019
4286
4495
5623
4699
4073
4788
4902
4897
4723
4574
5443
5936
3979
5214
3144
4120
5109
4077
4792
5612
5431
4291
3644
4081
6298
5149
4759
6067
4203
4292
6111
4566
5719
4890
5400
5619
6134
5638
4357
4590
4963
4242
4545
4406
6359
5065
5028
5775
4647
5019
4927
5336
5916
4885
4446
4572
5050
4230
5220
5877
4256
3605
4481
4629
4427
5126
4726
5131
4537
5999
4621
4840
3304
3919
3546
4279
6639
4011
3958
4813
4961
3350
3653
3908
4679
5354
4395
4086
4637
3787
4919
4942
3511
4786
4831
4984
4347
5006
4512
4778
4477
4319
6390
3867
5049
4869
5312
3971
4969
4610
5174
5829
3963
5816
6514
4922
4436
4443
4342
4492
5764
4739
4695
3234
3998
4334
4387
5407
3835
5846
5425
4801
5027
5501
4449
4357
4877
3716
6010
5195
3879
3270
3738
4103
3613
5114
3646
4672
5162
5113
4705
5374
5887
3672
5333
6039
3181
3395
3888
4231
5347
5576
7001
3840
3948
5437
4460
4492
4151
3256
3636
4866
4254
3760
5506
6055
6221
4856
4828
4091
5344
4541
5053
4971
5746
3319
4003
4521
4114
4598
3832
3802
4098
4593
5324
4258
7093
4084
6929
5196
3441
3817
4961
6348
4684
5222
4516
4249
5836
3809
5779
4232
5520
5134
4473
5696
5032
3628
4144
4290
5035
4558
3967
5294
4006
5198
4709
4753
5382
5182
5650
5158
5296
4961
4384
4450
5922
4156
5858
4867
5309
4180
4534
4508
5980
6764
4818
5933
5262
5313
3745
5654
4493
3539
5325
4245
3735
3507
3689
4765
5820
3510
4796
3506
4999
3865
3159
4072
4041
5204
5069
4620
4197
9008
6219
5236
3582
5406
4487
4284
6487
3535
4925
3410
5929
5560
5708
4574
4561
4476
5701
4024
4216
5822
3786
5274
4403
5617
3854
5252
4257
4626
4520
4318
4703
4065
3999
4487
3996
4998
5345
4070
3735
4243
4601
5246
4047
4014
4863
5141
6537
3542
4158
5025
5708
5943
4342
5604
3893
4232
5039
5255
5118
4523
3311
5169
3945
4897
4856
4931
4768
3940
4619
4933
4673
4621
4691
5773
5427
5944
4680
3530
3902
3823
5310
4728
4952
4497
4320
4686
4473
4326
4878
4217
4840
3952
4422
5726
5095
6596
4486
3649
3189
4896
4715
5308
3993
4096
6127
3853
4119
5843
4234
5143
4527
4529
3643
4549
3762
5780
5678
5152
5389
3935
4861
3341
4585
4462
3528
4211
4996
3549
4644
5708
5034
4776
4177
3962
4843
4213
4575
4537
5887
3712
4268
4620
5581
5524
4578
3814
5586
5310
3323
6512
4637
6034
4420
4436
5599
3617
5183
4798
4519
3989
6674
5673
6587
6297
3558
6036
7022
4698
4616
3474
4281
5290
5007
5587
4832
4362
4304
4485
4737
4534
4527
3667
5096
4295
5654
3602
4487
5933
4606
4167
5004
4172
4287
4050
6299
4033
6529
3594
4968
4689
5010
5508
5129
5054
3998
4000
5042
3318
3973
4397
3970
4809
4245
5251
6046
4734
4190
4405
4699
6117
4620
5134
5417
3528
4376
3796
4164
4497
5273
4748
5369
4231
4152
4528
5135
4358
5941
5387
5261
2984
3743
5236
5620
4951
4626
5631
4555
5437
5896
4209
6049
4576
4302
5316
5567
4523
5226
4757
5352
5092
4380
6447
5290
3854
4179
4691
4888
4498
4367
3985
3954
4962
3306
2853
5373
4635
4125
5361
4918
4937
5050
4632
5341
3595
5070
3653
5856
4701
4261
5497
3501
5067
5516
4831
4442
4240
5490
4168
5789
3861
4404
5025
5728
3825
5534
3871
4109
3735
4907
3777
4005
4209
5193
4534
4031
4851
4919
5479
5796
4615
4333
5672
3635
5807
4383
7300
5175
3679
3657
3342
5113
4889
4965
5122
5231
3932
6460
4529
3832
4458
3858
4272
4392
6302
3580
4778
3440
5369
4301
5057
6390
3719
4820
5736
5820
5083
6222
4666
5167
4289
4825
4683
5559
4906
5371
5169
4512
7007
4531
3961
4054
5514
4528
4289
4398
5951
4128
4498
3452
4174
5234
4212
4496
4294
4018
4017
5843
3443
4986
4897
7928
4193
3667
4217
5183
5458
5095
5961
5302
5081
5620
3379
6515
3458
4909
5701
4156
5144
4411
4654
5897
4070
6040
3830
5080
3674
4520
3684
4841
3805
4031
4334
4514
3554
6042
5438
4057
5222
5307
3615
4440
3342
5032
5707
4628
3273
4773
4155
5777
5535
3724
5168
4782
6062
5216
4378
4375
4940
5044
3921
3908
4903
3151
5723
4162
3287
3629
4581
4960
5778
5005
5311
3751
4178
5606
3371
5615
4628
3439
5363
4142
5454
4701
3641
7281
3494
4133
5280
4507
3830
5365
4889
5017
4279
4469
5383
4646
4459
5198
4536
5510
6134
3533
4067
5506
4477
4418
4367
4500
6697
4568
3900
4184
4374
5984
4139
4721
4145
4734
5861
4928
4188
4618
5264
3521
4759
5789
4888
4220
3949
5031
4477
4421
3913
4988
5300
3707
3868
4067
4931
4161
5616
5653
3685
5183
5986
5209
3946
4765
3573
5085
5414
5337
4972
5100
4744
3036
5200
4197
4415
3133
3601
4904
4126
4737
3675
5562
4805
5040
4343
5274
4785
4431
3347
4487
3470
5589
3190
5473
6627
3869
3341
5635
5988
4472
4355
4477
5977
4649
5617
3333
3360
3946
4922
4395
5580
5939
3794
6485
5780
4174
3822
5372
4614
5261
4517
5142
4416
5767
4934
6154
4653
3976
4309
5073
4681
5385
5743
3996
5234
4180
5199
5674
4050
3621
5485
4006
4733
4907
4107
5893
5559
4446
5163
5601
5875
4773
3699
4905
5977
5433
4205
4905
5610
4738
4130
4672
4916
5146
4343
4717
4779
4902
4224
4401
4892
3719
4395
4493
5394
3682
5327
4246
6731
3674
5530
3667
3918
6778
4861
3472
4626
4044
5129
3892
5167
4816
4991
4898
5581
4240
5194
3625
3840
5593
4016
6204
4725
4222
6065
5218
5122
3771
6972
5179
5535
5951
5580
4519
4084
6549
[truncated: 426 more rows]
