# Supplementary material for: Membrane-mediated dimerization potentiates PIP5K lipid kinase activity
Source: eLife. 2022 Aug 17;11:e73747. doi: 10.7554/eLife.73747 (PMC9470164; doi:10.7554/eLife.73747)
Supplement: Figure 4—source data 3. [file elife-73747-fig4-data3.xlsx]

## Sheet: Figure 4D
Figure 4D
mNG-5KB (D51R) single particle intensity (AU)	Fluorescence Intensity (AU) Bin Center	Frequency
5863	0	0
5661	400	0
4604	800	0
5246	1200	0
4485	1600	0
3549	2000	0
3570	2400	0
4284	2800	0.00057241
4545	3200	0.032055
5216	3600	0.0812822
4791	4000	0.133944
5643	4400	0.15913
5368	4800	0.167716
6293	5200	0.162564
5624	5600	0.133944
5459	6000	0.0663995
4464	6400	0.0360618
3517	6800	0.0188895
4752	7200	0.00686892
4882	7600	0.00057241
6738	8000	0
4813	8400	0
4039	8800	0
6329	9200	0
5022	9600	0
5380	10000	0
5479	10400	0
4355	10800	0
4823	11200	0
3899	11600	0
3803	12000	0
5248	12400	0
5066	12800	0
4774	13200	0
5518	13600	0
6158	14000	0
5969	14400	0
4484	14800	0
5609	15200	0
4243	15600	0
6382	16000	0
4506
3560
5147
6465
6787
4723
5456
4241
5482
4129
5391
3472
6832
5201
5452
3761
3262
4914
5745
4652
4834
4322
3364
4323
3215
4136
4275
4136
4154
4030
5467
5784
4824
3956
4534
6116
6252
4270
4913
4692
5105
3678
5034
4175
4566
6004
5362
5095
5601
3812
5810
5742
4290
5595
3901
3496
5004
3609
4423
4934
3894
5354
4225
5691
4821
4920
4483
4280
6654
6306
5166
5619
4467
4111
4216
4061
4536
3969
4005
4852
5389
5630
3113
5401
4136
4941
4561
5749
5229
4613
3830
5373
4391
3514
3973
3587
4207
5058
5740
5247
4533
3969
5435
3974
4931
5638
4453
4788
4842
3942
4609
5566
4332
4527
3989
4993
4452
4450
4930
3706
5392
4012
5512
4839
4771
4448
4242
5893
3688
3806
5419
7319
4125
5123
6543
4443
4718
4597
4156
3378
4393
4172
4778
4482
4046
4210
3513
3519
3436
5676
5129
4398
4509
5257
5264
6188
5589
6071
3695
5572
5438
5600
5796
4969
5716
5200
4651
3877
5468
4073
4152
5965
4568
4680
6947
4779
4901
5063
5180
4555
5392
6076
4027
5012
5099
5133
5273
4382
3564
3775
5225
3535
4737
4028
4639
3319
5010
4276
6186
3476
3948
5480
5584
4976
5385
3771
5619
5469
4793
5488
4420
4668
5016
4487
5314
5849
5123
5527
5293
4552
4302
6208
5638
3987
3342
4183
5403
3704
4171
5048
3311
3902
4303
5789
4252
4208
4076
3782
3842
6278
3521
4973
4354
4503
6255
3709
4427
5440
5527
4651
4386
3194
5423
3155
6137
4007
5163
4552
4437
5516
4106
4914
3842
5015
5418
4912
3764
6292
5132
5255
5739
5415
3804
5650
5283
4701
4516
3817
3703
4690
4402
6347
5860
4716
4485
3857
5347
5416
5097
4692
6134
5688
3575
5007
5510
5409
5569
5230
5172
4343
4384
5687
5137
3969
5606
6315
4721
5400
3738
4453
7196
5644
6051
4649
3689
5454
5248
5073
3435
5560
6222
4837
4345
6235
6013
5528
4671
5074
3723
3774
4003
3703
5267
5739
4154
4937
5349
6806
5783
5012
4308
6398
5126
4131
3829
4310
4395
3886
5637
4655
4639
6279
4366
5287
5361
4543
6800
4379
5088
3470
4558
3682
4397
4957
5109
4789
5276
5198
4147
3739
4467
6170
3579
4881
4068
4069
5718
3934
3903
3904
5029
3637
5609
6524
5651
4660
5004
5003
4152
4806
6014
5034
4199
4629
5444
5221
5558
4905
3722
4618
3997
4558
5264
5506
5780
5779
6236
5049
4400
4250
4219
4831
4267
4864
5002
3787
5206
4894
4621
3911
4548
3808
6718
5382
4925
5651
7357
4364
3823
5038
4489
4427
5069
4518
4427
4754
3970
6948
6312
5610
3489
5917
4199
4219
4782
4356
5572
4936
4215
4003
5257
5062
3908
5656
3594
4353
5385
5584
3491
4006
3307
4097
6235
4791
4270
4827
6470
4032
4216
4309
4058
4521
3902
5175
3633
4893
2997
7144
5296
5994
4640
4977
3834
5264
4154
6654
5073
5271
5502
5166
5728
5368
4216
6873
4542
4153
4308
4586
3249
4106
4837
3334
3337
4053
4393
3825
5019
4303
4025
4462
5678
3536
5663
3205
4483
5094
5580
4194
4195
4654
4097
4539
4055
4953
5540
4834
3860
4967
4516
5515
5560
5721
4792
4156
6059
5805
4653
4904
3835
3846
3822
4665
6066
5285
6067
4987
4964
4475
5699
5226
4547
5399
4602
5560
5702
3537
5886
5300
5863
5832
4981
5442
4215
3219
3263
4833
4127
4411
5963
4203
4364
5539
4676
4262
4904
4453
4528
4929
6121
5358
6568
3319
4082
5203
3721
5481
4825
4257
4021
5114
5175
3104
4945
4880
3341
6200
4994
5303
4965
5186
4492
5361
7251
3881
4852
5516
5726
4324
3776
5465
6553
5587
5011
5186
4765
4798
5229
6156
6776
5134
5531
4214
3850
4980
4536
4409
4781
4438
4749
4408
4571
3886
5061
4457
5175
5162
5043
3731
4168
6329
4759
5280
3581
4034
4975
4929
4285
4502
5478
3539
4734
4548
4263
5106
5335
5400
3981
4941
5027
5747
3566
6560
5465
5468
3687
4825
5786
4082
4936
3322
3454
3785
5053
4940
3846
3350
3493
6173
4816
7028
5178
5281
4817
4372
3788
3353
4081
5157
6780
5395
5932
7143
3942
6255
5435
4429
4946
4733
5162
4318
5470
5196
3687
5051
5642
4351
5038
5209
5187
3738
5117
4889
6585
5656
5031
4998
6267
4973
4575
5259
5225
4909
3548
6047
4156
4931
4126
4061
3870
3888
4833
4751
4735
5700
4834
4011
5303
5354
3838
5239
4569
3849
4927
4657
3745
4261
4686
5197
4174
4789
4423
3397
4666
4376
5334
4433
4427
3960
4643
4343
6540
5256
3909
5744
4372
3817
5662
4420
3978
5927
5284
3320
4053
4944
4625
4567
5774
5085
4743
3884
5481
5963
6081
3694
5024
3598
5453
4116
4013
3782
4702
5026
5012
4929
6363
4890
4480
4496
4282
5993
4243
3903
6201
4661
4395
4176
4414
5000
5062
5718
5501
5880
3840
4088
6580
5844
4975
4426
4256
3997
5593
5317
6391
3866
3826
5375
4056
4655
4836
4717
5170
5212
5670
3572
5202
4259
5746
5602
3802
5632
3451
4583
5696
5054
4289
6816
5826
4995
4675
4351
6248
5323
5250
5306
4110
4957
3198
4898
6018
5395
4544
5641
4112
6130
4903
6035
4975
5647
5387
5221
4107
5811
5601
3503
5010
5133
6388
4862
5318
4632
3363
5360
4532
5860
5861
5513
5062
4073
4287
4197
3528
3598
3809
3345
4301
4820
4414
4724
5299
4946
4195
3948
3716
4576
5986
5077
5053
4108
4940
4129
5378
4457
6154
4673
5271
5915
5383
5310
5554
4162
4680
4713
6047
6379
4727
4736
3556
7100
6681
6008
5063
5123
4572
4638
4375
3205
3594
4663
5638
5447
5490
4035
4062
4225
4825
3810
6107
4035
5822
5143
5697
5113
3802
4961
4490
4655
5618
7111
4648
5897
4749
5310
5449
5641
4765
3773
3326
4945
4861
3609
5320
5749
3978
4651
4515
4981
5697
4659
5697
5620
4859
6055
5670
3703
3541
5574
5029
4329
4104
4639
4562
3140
3939
4386
5094
4392
3909
5032
5765
4220
5637
6073
4399
4320
3776
3991
5374
4857
5763
5100
4598
4497
3738
4130
4788
3905
4311
4868
4541
5021
5259
3825
4831
6446
4378
3485
4498
4688
4731
4828
5800
4899
4374
4878
4362
4089
4971
4308
3734
5965
7079
6208
3692
5550
6556
5279
3024
4554
4065
3903
6025
5324
4680
4547
3854
3947
3944
3214
5197
5548
5429
4965
6553
4941
3794
4703
4613
5402
4976
4582
3706
6721
4327
5446
5262
4376
4881
3622
4530
5990
4299
5905
5660
5229
5763
4801
4866
4234
3771
5059
3930
3716
3750
3907
4941
4195
4549
5925
4309
5682
4505
5484
4557
6015
5314
6712
4659
4617
4171
5882
4993
5040
4688
5872
5585
3986
4263
5327
3998
4394
5086
4547
4166
4017
4121
4578
5850
4093
4279
3951
4630
5135
3896
4336
5718
4850
5109
4173
5264
4707
4773
6345
4467
5291
4695
4004
5664
5956
4513
5666
4783
6942
6713
5238
3673
5577
6501
4883
5825
3398
4770
4448
7262
4554
4142
5205
4182
4403
4477
5102
4323
4951
6805
4982
4731
4799
3685
5197
5610
4488
4253
5249
5071
4873
5737
3627
5290
5962
5863
4831
5035
4959
5391
4514
3393
4262
5493
4650
4505
4251
5577
4424
4376
4430
3964
4403
4744
3835
4527
6774
4823
5542
5481
4871
4444
5568
3176
4531
4775
5056
3333
4176
5101
5692
5900
4376
5155
4390
5358
6704
6075
6629
5107
3995
5204
5204
4608
4245
4933
5112
5808
5247
5204
4709
4763
5130
3395
5041
4709
3554
5843
3747
5246
5304
4988
4326
4681
5396
3210
3710
4484
4574
3987
3658
3228
5446
4561
4065
5033
4204
5497
4560
4647
3793
6156
4186
4272
3968
5722
3919
3621
5529
4685
6279
4630
3526
5064
4816
4834
5502
5504
5332
5428
4594
5749
4506
3809
5293
6307
3703
4648
4260
3357
6817
5037
4327
6072
4879
5736
4692
5189
4850
4645
3230
5407
4289
3564
4407
5823
6143
3639
3616
5223
5472
5538
4036
5715
5150
3995
4994
4277
5724
3726
5555
4928
4811
4029
6192
4078
5062
4515
5693
4999
4715
4330
5976
5690
4234
6113
4002
5783
4896
4042
5631
6026
4596
5712
5765
3430
4245
5357
4503
4935
4669
6819
5321
5744
5110
4745
5692
5433
4348
4721
4709
4557
4554
3344
3276
5582
4286
6090
3865
5498
5157
4049
5040
4421
6071
5295
4399
4816
6975
5113
4804
4825
5589
5766
5614
5032
4579
5290
6284
3573
4190
4311
5656
6368
3860
3748
3725
3267
3869
3774
3784
3648
6153
4788
3761
4152
6003
3794
4951
6072
4282
5926
4382
5550
4564
3716
4704
6033
6955
3525
3841
5439
4833
4750
3810
5189
4323
6669
4681
4443
4494
5421
5005
5117
6349
3563
3888
3217
5611
3407
5795
4177
6890
5524
5931
4724
6234
5615
4554
4947
4498
4060
3773
3478
3943
3266
5419
4799
4796
3452
5226
4073
4804
3751
5088
6040
4217
6011
6196
4176
5738
5331
5462
3263
3718
5657
3140
3242
4096
5892
5184
4732
3646
4151
5016
5378
4170
5954
4715
5318
6205
5071
4939
4750
5588
4054
3954
3863
6415
4899
4159
3965
6651
3701
5701
4729
5663
4485
3522
3561
5571
4781
3579
5223
3183
3656
6422
3930
6677
4870
3111
7070
3815
5391
5541
4827
4301
4933
5165
4055
3251
5956
4567
5933
4984
4680
6496
4276
5267
4036
3976
5697
3836
4762
5610
5551
4405
6163
4558
3570
5160
5613
4119
5659
5180
5788
4165
4969
4640
5820
4673
4885
5358
5334
3654
3708
4759
5578
5977
5137
5678
6298
5243
3306
6113
5045
5425
4211
4665
4622
5951
4253
5352
5179
5389
6093
3915
5116
6261
4874
5809
5993
6472
3904
6001
4890
4506
5572
3837
5239
4356
3874
4857
5768
3961
6017
6475
5263
4739
4319
5091
3793
5581
5061
5177
4800
3390
6288
5598
5210
3749
6647
3881
5394
4917
5168
4110
4945
4838
5144
4296
4527
5138
3477
5151
3436
6032
6070
4906
3410
4247
7469
6158
5301
4120
5021
4521
5048
3714
4888
5849
5374
3598
4972
6678
3466
6264
3799
4192
3816
4927
5748
3964
4268
6552
6064
6382
4406
3594
5137
5353
5221
4443
5874
5038
5635
3426
5592
5820
5513
5294
5046
4072
4683
5625
5602
5494
3285
4244
5236
5093
5555
6585
