# Supplementary material for: Membrane-mediated dimerization potentiates PIP5K lipid kinase activity
Source: eLife. 2022 Aug 17;11:e73747. doi: 10.7554/eLife.73747 (PMC9470164; doi:10.7554/eLife.73747)
Supplement: Figure 4—source data 4. [file elife-73747-fig4-data4.xlsx]

## Sheet: Figure 4F
Figure 4F
distance (µm)	intensity
0	1870
0.1067	2516.95
0.2133	1921
0.32	2031.85
0.4267	2060.21
0.5333	2178.12
0.64	2236.31
0.7467	2153.21
0.8533	3369.5
0.96	5801.01
1.0667	10962.9
1.1733	12675.7
1.28	8753.96
1.3867	4717.44
1.4933	2792.02
1.6	2681.13
1.7067	2629.63
1.8133	2338.97
1.92	2012.92
2.0267	2125.3
2.1333	2410.54
2.24	3015.87
2.3467	5060.25
2.4533	9328
2.56	11314.8
2.6667	9414.08
2.7733	4929.59
2.88	3103.69
2.9867	2415.51
3.0933	2346.31
3.2	2213.64
3.3067	2250.82
3.4133	2215.7
3.52	1912.66
3.6267	2250.55
3.7333	2779.31
3.84	3582.7
3.9467	4929.82
4.0533	5225.27
4.16	4509.24
4.2667	3209.36
4.3733	2642.21
4.48	2200.71
4.5867	2088.07
4.6933	2368.94
4.8	1875.95
4.9067	2548.09
5.0133	2462.28
5.12	2284.74
5.2267	2148.92
5.3333	1913.1
5.44	2018.13
5.5467	1929.97
5.6533	2132.34
5.76	2257.3
5.8667	2720.21
5.9733	4258.92
6.08	6163.71
6.1867	6029.78
6.2933	4790.65
6.4	3191.76
6.5067	2437.98
6.6133	2141.28
6.72	2380.07
6.8267	2507.03
6.9333	2352.03
7.04	2284.56
7.1467	2284.24
7.2533	1702.24
7.36	1870.28
7.4667	2055.9
7.5733	2855.86
7.68	3985.13
7.7867	5332.01
7.8933	5941.02
8	4453.68
8.1067	2886.93
8.2133	2583.28
8.32	2235.49
8.4267	2061.27
8.5333	2093.42
8.64	2136.86
8.7467	2141.21
8.8533	2486.98
8.96	2285.96
9.0667	2737.79
9.1733	2878.36
9.28	2516.5
9.3867	2551.84
9.4933	2388.44
9.6	2210.88
9.7067	2002.42
9.8133	2028.23
9.92	2040.07
10.0267	2157.43
