# Supplementary material for: Membrane-mediated dimerization potentiates PIP5K lipid kinase activity
Source: eLife. 2022 Aug 17;11:e73747. doi: 10.7554/eLife.73747 (PMC9470164; doi:10.7554/eLife.73747)
Supplement: Figure 4—source data 5. [file elife-73747-fig4-data5.xlsx]

## Sheet: Figure 4G
Figure 4G
mNG-5KB single particle intensity (AU)	Fluorescence Intensity (AU) Bin Center	Frequency
3562	1000	0
3733	1400	0.000264434
3523	1800	0.00220361
7272	2200	0.00713971
4876	2600	0.0179815
3057	3000	0.0431027
9862	3400	0.0785368
2756	3800	0.123402
2718	4200	0.155134
4167	4600	0.169326
4244	5000	0.136888
3890	5400	0.0991626
4874	5800	0.056677
4034	6200	0.0284707
4393	6600	0.0157779
13155	7000	0.00802115
3524	7400	0.00599383
5397	7800	0.00370207
5265	8200	0.00405465
4341	8600	0.00343764
3183	9000	0.00449537
3395	9400	0.00484795
5356	9800	0.00414279
2960	10200	0.00546496
3164	10600	0.00520053
3793	11000	0.00396651
4109	11400	0.00343764
5153	11800	0.00273248
3973	12200	0.00202732
4245	12600	0.00114588
3231	13000	0.00105773
4352	13400	0.000793301
3316	13800	0.000264434
3179	14200	0.000352578
3681	14600	0.000176289
2795	15000	0.000176289
4107	15400	0.000176289
2820	15800	8.81446e-05
6027	16200	0.000176289
9196
4305
3926
3385
3545
2780
5897
3268
3618
3714
3947
3949
3779
4823
3074
10533
3966
4446
3876
3840
2711
3152
3190
4343
3919
3107
6759
3724
3522
2877
2517
3905
8460
8341
4408
3379
2979
4439
4872
3408
3515
3722
4752
3160
3836
5350
3945
5568
3500
8479
4033
3737
3367
3542
3192
4000
3722
3934
2817
2989
3533
4048
4487
4175
2076
4199
3683
4798
4908
1919
3265
3562
5525
5096
1626
4044
3901
4489
4452
7846
4555
4108
3867
3911
4123
3394
4049
3104
4025
3330
4691
5580
3079
4863
3024
8969
4395
4449
4239
5470
8141
3520
4855
1707
3841
8687
2421
2833
3941
4941
4542
3739
4148
3571
3777
3590
3539
4716
4037
4186
4924
3234
4119
4779
3067
4922
4118
2452
2492
3089
4834
4702
9026
3271
4635
3212
3877
3646
2421
3430
3150
8152
3630
4727
4488
2820
4163
3795
5447
3754
3583
3879
4029
4407
4079
3740
3889
8267
4238
5007
4801
7291
3100
3535
5060
3690
4218
4752
3977
3447
5026
10070
5194
5747
3506
3075
4886
4500
4288
3998
3922
5758
3857
7070
5646
8267
6800
4394
2361
4495
3971
4058
3990
2615
3879
4700
4918
4320
4214
9964
4691
4075
3933
3391
3098
3592
3831
2852
3417
4233
11221
3996
3699
4765
4641
4540
4592
3743
4139
3154
3795
3088
5002
4170
3254
3507
3693
6365
4105
3365
3945
4240
4970
5180
4270
4995
5671
5496
3611
3927
4750
4495
4540
4570
8023
4254
4488
5255
5221
4520
3807
4342
4535
3490
4245
5205
4147
3300
3382
4368
3568
3675
3130
3588
4597
4214
3718
4664
4482
3917
4544
2090
4825
2811
3703
3561
2797
4765
4381
4370
4860
4115
4832
4069
5109
4829
3652
8654
4418
2981
4320
4965
3866
4997
2003
5350
5427
3386
3912
3295
10992
5153
3000
6464
3752
4541
5585
5300
5197
2626
4434
4139
4508
3812
5807
5204
10574
4174
2969
3969
5363
5079
4354
4108
5518
4053
4370
3700
4639
3323
3432
7596
10413
3952
3866
3934
3407
5639
4928
3953
4943
4427
4793
4477
3820
3687
9216
4836
3724
4438
4972
3119
3311
4456
3314
4588
4284
4257
4981
4747
2325
4034
4526
2725
3749
10767
3983
5175
4987
3680
5891
4016
4920
6068
3360
4682
2271
3992
3830
3941
2954
3319
4663
3904
4404
4159
4481
3512
3590
4761
4710
5059
4724
5094
3890
3431
3769
3810
4832
4165
4433
4708
4581
3856
4480
4156
7717
5164
5156
4976
5050
4122
8823
4795
3663
4197
3865
4769
3824
5876
3460
3392
3761
3156
3873
4324
2609
5331
4196
9649
5815
6283
4012
4925
4305
4762
5306
4856
4579
4090
4843
4226
4543
5351
5803
5048
3802
4224
2519
9862
2967
3202
3610
4015
6809
3214
3035
4147
5802
6254
5069
6706
3846
4998
4267
5165
4379
4850
5303
4873
6793
3902
5246
11346
4776
4562
12070
4418
5612
3488
6380
4367
4702
4662
4566
5047
5587
9779
4315
6955
5453
3906
4720
3379
9666
4536
4208
5133
4442
4778
5525
4266
3502
7291
3866
4691
4425
4410
6627
3688
4289
4010
4780
4895
4625
10429
3644
5778
5262
13787
5798
4639
3252
3680
4623
3845
4576
3400
5130
5110
4672
6214
11532
5973
5274
4256
11085
4447
4968
9887
5639
3982
4668
4565
4781
6200
4496
4035
4694
14667
4213
3735
4626
3959
3720
4464
4459
5727
5531
4888
4852
5543
4573
4268
5037
5107
2536
3917
4047
5142
4522
6689
7032
3333
3800
2920
4062
4575
5642
4121
4727
4204
3948
3967
5463
10993
4851
5043
5724
3736
4576
4835
6436
5007
4368
5898
5255
4389
6632
5179
5687
5069
5853
5795
6280
4088
9079
4313
3748
4600
9254
4503
3869
4966
5059
3894
4521
5148
4202
6083
5286
4663
4864
4979
4507
4469
4084
4508
6117
3429
4432
5082
2345
4678
11453
4057
4180
3492
4147
3673
4167
4814
3368
4201
5974
4388
5331
4444
3979
4673
4206
4052
5642
4632
3799
10003
3387
3654
2706
5013
3834
4556
4490
5133
6423
6083
3251
3596
2646
3552
3371
7336
5752
5720
6139
5525
3368
4697
3109
3423
4058
4169
10875
4301
3412
4450
4587
5282
5836
5084
4581
4369
3436
4214
4881
4410
4136
3759
4236
5394
4523
4439
3076
4851
2882
4589
3523
4188
3488
5383
5314
4674
4263
5025
9543
3129
5187
4845
3791
5961
5546
14215
4853
4457
4121
3842
4251
5075
2932
5518
4786
4444
3747
3875
5288
5770
5117
4164
2173
5045
3067
3842
4035
6645
5176
7463
8532
5338
3543
7825
5112
4943
9177
4589
4489
5553
4160
4226
4215
4609
5318
5527
4478
3528
3856
5108
3997
3681
4792
5201
3777
5181
5165
8367
4189
7230
4058
3501
3616
5282
5072
3724
3640
3604
5327
4603
9296
6229
4275
6501
4346
6742
4193
4259
5408
3377
5672
4059
4434
3145
6048
5676
5051
5872
4375
4235
4072
4866
3785
4285
3937
4491
5206
4883
5846
4573
6389
3845
5413
4621
5110
5411
5063
5717
5482
4445
4385
4258
11003
5281
5646
4174
5575
5359
4754
3987
5077
3797
3153
4429
4364
3559
4735
5566
4023
3507
3856
2488
4473
5131
11263
4957
5152
5334
4853
1980
3433
6345
4068
5190
4900
4483
6126
3606
3729
3235
5034
4137
4043
5595
4014
4987
4445
3362
4615
4086
5097
4532
4095
4889
4642
5521
5144
5492
4409
5824
6436
6200
4411
5838
4843
4668
3032
3976
11809
4275
4247
4765
4022
4374
2669
5503
4699
5633
4874
6234
5746
4548
4679
4484
11343
4441
4918
5546
4761
6541
5859
4370
6666
4343
4483
3971
4548
3978
4508
5378
4121
3809
5681
4954
4620
5439
3723
4549
6175
4902
3973
4110
5180
5803
5037
4062
5078
3840
3673
4934
4556
4762
4102
4217
4928
11294
4567
6708
5605
6456
4703
3763
21953
6860
9986
4598
3895
5291
4182
4285
5439
4742
5694
12716
5715
5568
6136
6286
10604
3859
5155
9580
4001
3203
4109
5921
4322
3162
4562
3846
3914
5943
6346
5540
5310
4501
4678
5325
5127
4596
3688
4580
4503
8301
5566
5078
5862
3725
3807
4913
5596
4777
5791
8048
4789
4354
4459
5311
6190
4649
5668
4186
4577
6678
4599
4473
5051
4595
4909
4463
3598
4928
6795
4956
6013
5089
3768
5114
4579
5563
5625
3780
5364
4395
5094
4449
5461
4560
6852
6106
4382
3113
5627
2638
3677
6162
5027
4966
8096
4486
4934
5779
5861
3871
5508
11671
4784
3459
4639
4570
4358
4455
3394
5655
3678
5482
7287
5718
11991
4382
4693
4595
4806
4286
5478
6122
4379
4190
4286
4618
5426
4126
3426
4417
4499
4802
5625
12441
10766
3601
3724
4257
4212
3480
3914
5084
2616
4245
5550
5921
3589
3828
5223
5671
4101
5026
11438
5685
5838
5892
3702
3038
5647
6494
4393
5866
5120
6245
3729
6045
5256
4655
6363
4083
5595
5223
2260
4666
5442
3995
4719
3608
2828
2732
4483
5448
4262
6097
5232
5130
6724
4320
4888
6429
4416
4569
5457
5281
5178
2287
5224
4898
3314
10828
4718
4104
6594
5087
5330
5248
5161
10145
12346
11530
3373
5109
5343
4379
5023
4116
3840
6133
4053
5860
4275
4596
3235
5131
4604
4797
4354
3350
5307
5644
3072
5072
5101
4479
4064
5255
5108
3879
5094
3325
5072
4047
5407
2168
3176
5373
4543
4088
9177
6071
4722
4071
3930
3345
5551
3690
4425
9936
4940
3995
3386
5232
4514
4350
5102
5299
4549
3996
2942
3961
4149
3418
5459
4691
4447
5045
5693
3158
6041
2692
5423
3453
4025
5151
4791
3305
4292
5498
4719
5449
5717
5050
5316
4043
4589
3932
4205
3379
4644
3773
3858
3972
3822
3088
4131
3446
4859
2632
3333
5041
5371
17833
4150
4935
2958
5198
5402
5006
3766
2352
5410
5042
4741
3070
3256
8484
4689
3346
4585
4070
5068
3477
3799
3679
4659
4568
4222
5609
3052
3476
4325
5366
3624
5406
4527
3570
4656
4517
3835
3946
2994
3164
4027
4250
4965
3048
5100
4794
5099
5631
5543
4650
4231
4798
4410
5026
5722
7249
5307
4223
5458
3543
5024
4405
4226
3420
5206
8359
4327
4787
4190
4182
4768
5106
5512
3449
4176
4101
4444
4431
4534
2500
4297
5039
1714
3853
5404
5273
3897
5775
4958
3943
4289
4068
4823
6146
5407
4515
4844
4540
5646
6086
4819
4078
12423
5252
4406
4309
5070
5925
4253
7285
3047
4155
4159
4347
4625
4266
3913
2929
4682
5096
4536
4764
3267
4819
3385
4843
2744
3627
4305
4223
3173
6492
5298
4657
6930
5309
4798
5086
4266
5656
5549
6413
5006
4611
4911
5290
4506
5818
4222
5853
4108
4230
4214
5331
5049
4257
3653
9319
3881
12390
5529
4077
4659
4246
4504
4563
7225
6563
4957
5458
4347
6231
3825
10182
5219
4591
4781
5499
4983
6139
3325
5574
4824
5092
5152
4958
5116
4232
12095
4596
3768
5520
5763
4072
5677
5328
5440
4900
5079
11830
5784
4742
4501
5012
5121
4793
3683
5530
5346
4156
4905
5488
5708
2964
11786
11719
4595
4716
5457
4890
4358
5668
4194
3993
4668
4548
11764
5147
5596
7492
5314
6405
4203
4720
6021
4790
3900
7067
4407
4035
6042
4500
5426
4941
3986
4103
5315
4752
3567
5460
3898
4468
4914
3438
4904
5139
5349
5451
4266
3265
3223
5206
4357
4171
4040
4099
4313
5563
5485
3511
5241
6245
3800
5158
4306
4633
4189
4176
10602
11531
4584
3861
6214
6522
5355
4003
5127
3839
4532
2532
7204
4599
5907
5200
5560
4513
4321
4268
4526
4765
3674
4477
5535
2980
4209
3574
3792
3680
3313
5003
3758
4646
5225
4415
5162
6051
5129
4841
5955
5802
5272
9346
5542
5499
5065
4516
12338
10880
4130
4928
4688
2536
3569
3017
7217
5118
3927
3959
4246
3878
4791
5285
3648
4436
4719
4198
3627
5507
5176
4709
3403
10446
5498
2798
3577
6431
5170
4351
6399
5401
5168
4602
3699
4412
4380
4953
4633
4592
7538
4435
4464
10366
4851
4765
4742
4518
4616
3733
3213
5236
4318
4980
7976
5186
4966
3579
3820
6841
4925
5163
4130
4332
4588
5521
2866
5244
5663
5679
5297
3464
4543
4395
5047
4700
4197
4193
3896
3294
3556
4853
4469
5254
5821
4578
4987
3567
4916
3739
3421
3837
3275
9454
3061
4756
3822
4092
6114
5148
5567
5505
4140
4247
4703
4734
5304
4555
4972
3898
3730
12432
7253
3697
4320
5882
16148
6223
3913
6274
4671
5537
5409
4553
2214
6120
6477
3471
3694
4373
4150
3656
5458
4563
4586
4153
4216
4709
3572
4675
5706
4283
4353
4610
7702
4402
5320
4862
6653
4128
4263
4471
5481
4973
10097
5529
8977
3279
4230
4372
4294
7464
3967
5033
6159
4051
3944
3456
7957
4897
3889
3591
4508
11418
4627
3044
4865
2993
4000
4676
6764
4020
6608
4057
5232
5385
4158
4470
4020
5615
4184
4525
4857
9834
4580
4861
4273
4649
4912
3188
4692
8995
4027
3912
4891
4234
5884
4077
4157
3761
3231
4384
3729
4884
3826
3825
5051
4524
3226
4291
3372
3846
3482
5512
5449
5328
4072
3101
8246
4046
5357
1989
5591
6781
5434
5579
4327
5293
3134
5057
6705
6115
7343
5216
3786
5763
4074
4336
2799
5047
5758
4124
5189
5046
4324
3727
3212
5397
7540
5192
4492
5957
5549
5623
6439
3911
4562
7830
5766
4928
4657
6606
5419
5256
5305
3889
5751
3099
5779
5193
5737
4305
4479
4539
3605
3446
4884
6605
5368
5434
3826
5603
7063
2884
4836
4315
11212
4870
4077
4236
3473
4854
3350
4236
4563
4944
5715
4999
4661
4095
4339
4809
3974
6605
3245
4758
9501
5022
12398
4723
4341
5762
3976
4676
5237
3941
4591
6401
7487
5544
4650
5953
4964
4816
3961
5773
6106
11877
3670
3576
3397
3697
4833
3078
4225
5293
6120
4156
4079
5122
5103
4192
6186
5926
5548
4433
5694
3901
4026
[truncated: 9,357 more rows]
