# Supplementary material for: Membrane-mediated dimerization potentiates PIP5K lipid kinase activity
Source: eLife. 2022 Aug 17;11:e73747. doi: 10.7554/eLife.73747 (PMC9470164; doi:10.7554/eLife.73747)
Supplement: Figure 4—source data 6. [file elife-73747-fig4-data6.xlsx]

## Sheet: Figure 4H
Figure 4H
mNG-5KB (D51R) single particle intensity (AU)	Fluorescence Intensity (AU) Bin Center	Frequency
3905	1000	0
3530	1400	0.000470256
4677	1800	0.00282154
3895	2200	0.0112862
3607	2600	0.0261776
5757	3000	0.0585469
4609	3400	0.101889
4957	3800	0.15009
5141	4200	0.172819
2532	4600	0.168665
4749	5000	0.130104
3319	5400	0.0774355
3807	5800	0.0427149
4700	6200	0.0224939
3488	6600	0.00924837
4047	7000	0.00689709
6175	7400	0.00579983
4228	7800	0.00321342
3475	8200	0.00203778
3255	8600	0.00266479
2971	9000	0.00180265
3755	9400	0.00109726
3564	9800	0.000627008
4344	10200	0.00039188
3489	10600	0.000235128
2595	11000	7.8376e-05
4339	11400	7.8376e-05
3646	11800	0.000156752
3614	12200	0
2411	12600	0
7379	13000	7.8376e-05
4290	13400	0
5204	13800	0
4026	14200	7.8376e-05
4812	14600	0
4028	15000	0
4375	15400	0
4437	15800	0
3994	16200	0
3926
4620
3097
2623
3722
4644
2592
4732
3239
5023
2826
3845
3882
3839
4557
5143
3570
4382
4193
4299
4132
4560
3306
3859
4007
3087
3617
4436
9732
3040
4327
3864
3122
4644
3492
2933
4584
6146
4614
3832
5672
4260
3811
3990
5503
4304
3489
3656
3450
4833
4655
3971
3261
3856
4212
4085
3589
3766
3570
4237
5195
4770
4793
5645
4638
3033
4467
7392
4287
4142
4327
4688
5138
4465
3966
3128
3873
4349
3217
3534
4263
4493
4170
4113
4487
3386
3237
4557
3640
4585
4311
3294
4445
3759
4633
3993
4666
4493
3117
5529
3795
3907
3832
3711
3995
3016
3683
4027
1955
3456
4455
5674
3172
4583
4926
4632
4644
3302
4254
3692
3895
4980
4134
4065
3137
3707
3165
3728
3382
3588
4747
2071
3408
3091
3801
4823
3965
3093
4643
3855
8766
4805
5348
2909
5438
5892
4481
5483
4057
3465
4286
5203
4794
4718
3024
3727
7601
3929
4510
4085
4914
3202
3998
4345
3835
5306
5025
4367
3619
3563
4495
5352
4083
4366
2268
3459
3472
3687
4466
6675
4375
5135
4873
3278
3342
2962
1877
3337
4969
3734
3029
4845
4076
4751
4266
3958
3385
3863
5749
4035
3813
5097
3519
4247
3378
5204
2920
4973
4196
4910
4292
3677
5589
3353
4721
5315
2880
3842
4602
4988
3745
2836
4727
4790
4410
3930
5755
6365
3860
4303
3634
3252
4673
7873
3508
3141
3979
4083
3411
3824
4134
3573
5833
7323
3510
4815
3384
2967
2800
5260
3974
4344
3478
4668
4997
2187
4486
7976
3600
3973
3835
4176
3963
4449
3841
3865
2808
4426
3377
3665
3922
5256
4407
5129
6476
3640
4960
3213
6412
5620
4377
5172
4020
4858
3895
3129
3917
5360
4644
4010
5962
4562
3340
4941
3734
4513
4143
5799
4032
7308
4649
5626
3424
5280
4517
4101
5252
4122
2653
4007
4321
3001
4401
4121
3019
4268
5080
4190
3243
3762
4327
2757
2783
3260
5201
3875
6051
4722
3021
4389
2597
4080
3193
3814
4080
3217
4554
5875
3789
4317
4051
5290
4990
5295
3919
3700
5113
4187
4216
4015
4949
4204
4485
5079
5055
3407
5149
4357
4821
4415
4642
4476
3397
4446
4806
7624
4795
3896
4931
4310
3438
4898
4378
4426
3619
2942
4763
4582
4741
4124
4064
4754
3067
4439
6186
4390
4999
4750
3215
3553
3979
3571
8709
4201
4660
4859
5347
4764
9215
4958
3785
4061
5049
4093
3536
4711
3637
4485
6013
3638
5088
3072
4335
4793
4350
5135
4330
4797
6013
4003
2804
4012
3633
4458
4240
5682
3851
3567
4429
3615
4456
4649
5886
3765
2981
3716
3239
4431
4776
4253
3865
4036
4745
3842
4671
4299
5420
4098
4518
4861
4831
5986
2495
3338
4534
5772
4285
4696
5443
2683
3918
2720
5221
4496
4635
3875
3056
4772
4614
4649
3756
4127
4067
3311
4241
4991
4257
4263
2513
3371
1914
3431
6023
4022
4415
6185
7109
4007
5838
5875
4789
6281
4455
3801
4656
3271
4205
4461
4593
4477
3784
3437
4527
3954
4173
4119
5163
3945
4476
3912
3592
4382
4698
6403
3996
5967
3928
3529
3681
3819
5046
5856
5065
5681
6049
4403
5434
5450
3337
3103
4426
4416
5603
8792
5257
4651
3838
2641
3654
5221
5854
3409
4797
4917
5122
5724
4736
5369
3863
3998
4637
5755
5003
6434
3397
4344
5201
4550
3815
5383
4579
2952
5345
5201
4675
5292
4395
4692
4242
5059
3957
3667
6247
4156
5081
3907
4342
4526
3075
4839
4475
3343
4461
5173
3491
4483
5158
5366
5763
5652
5055
4886
4661
5277
4509
5553
5552
5122
4898
4520
5121
5300
2997
3639
4748
4662
4296
4415
4672
5975
3993
3897
5270
9059
3528
4505
4591
4979
3295
5232
5466
4108
3827
3807
4931
4570
4688
5541
5110
3360
3272
3678
3197
3164
3787
2954
7601
4135
4821
3916
2614
4150
4157
4475
4102
2759
6102
3727
5892
5371
4293
4917
3045
4557
3858
5309
4060
5986
2994
5235
5070
6072
4819
4830
3705
4228
5378
4837
4443
4316
5790
4304
5563
4118
4112
4768
4905
5070
4047
3217
4430
5115
4600
4226
4437
4540
4607
5696
4743
5347
4624
4921
3508
6120
3718
6018
5707
4977
5041
4009
4109
4791
3916
4131
3848
3393
2891
4210
3988
4455
4345
4961
4762
4603
4568
4632
4732
4488
5283
5905
4698
2542
3595
4213
5035
3581
4711
3951
4874
5635
5394
4209
5034
5159
5980
8459
4658
4491
5321
4906
3662
3979
5167
5052
5294
8991
5075
4203
4557
2993
4937
4738
4471
7750
7123
5118
4925
4492
5236
3377
2456
5409
4709
4827
5094
5327
5026
4509
4065
3359
4526
5107
6758
6165
3711
3782
3857
5081
2864
3277
4023
4979
4393
4717
5940
4278
4446
4339
3450
2643
4658
5226
3202
4115
3109
4346
3825
4722
3910
8772
2747
4971
3786
4879
4342
2950
5070
4350
3578
3807
4853
3725
5255
5039
2960
5993
3832
3726
3625
3963
3895
5035
2892
4663
3492
4154
4051
4268
3178
4130
3724
4542
4584
4165
3409
4341
3980
3291
5862
3784
2638
3300
3361
4263
5366
5987
3980
4285
3875
4440
4635
4770
4603
4921
6015
4161
3472
4284
4601
2646
7134
3347
4185
4659
4368
4203
3675
3474
3794
2713
4112
3711
3764
4679
4944
3185
4833
4984
5473
5290
5094
5019
3396
7801
3998
5130
3982
5426
3687
6826
3093
4668
3630
3088
6668
4991
4741
6091
5134
8374
4357
2931
3110
4368
3659
5100
4189
4123
4476
2928
5024
4770
4635
4970
4906
4510
3537
2391
4326
4612
4055
4737
5274
4391
4601
4111
5269
4882
3571
4649
4814
3563
3951
3779
3979
4500
4459
7982
5596
4787
5160
3476
3885
4711
6666
4970
5135
3660
5033
4423
4132
3636
4510
5843
4907
4217
4004
4487
4308
9295
6411
4721
4368
3546
4019
4073
5184
2250
2723
4611
4681
3285
5209
3305
10554
3616
5264
5444
6154
4900
3110
3355
4643
3065
4185
3310
3964
3418
9500
3595
2327
3904
4004
5046
2904
3745
3267
4189
4743
4457
4246
4934
3742
4046
3922
3880
4029
4103
3681
3081
5254
4042
6310
3318
4629
5228
3056
3845
4481
4581
3379
4166
5022
5129
4069
4982
3666
4558
4298
5790
6358
3633
3568
7565
4937
5452
3766
6264
3974
5175
3336
4357
5313
4750
5415
3176
4619
6074
4739
4759
3313
3389
3212
3505
5126
3956
4826
5956
6005
4501
3381
5885
3969
4439
4070
4829
5069
3775
3401
5293
5171
4686
5366
5761
4326
3992
5332
4165
4966
3619
4145
4525
4476
3761
3925
5033
3797
5094
4537
4920
5936
3470
4593
5241
4946
5449
5265
3899
4656
4347
4355
4223
3625
5153
4948
5321
5608
4367
3830
4689
3318
4411
5505
5431
4834
5704
3422
4138
5280
5673
5553
4320
3870
5199
4340
4513
4242
4026
3595
5326
4329
3188
3853
4455
4394
3207
5069
4958
4464
4087
4660
4927
5473
3842
3735
4554
4114
2814
4737
3167
3257
3446
5392
4510
3214
5388
4638
5300
3036
3154
4451
6024
3937
3304
5405
3812
4954
2749
4661
5608
3221
3951
3606
4720
5569
3885
5569
4144
5074
5856
3649
4123
9747
4522
5984
5536
5112
4439
6864
5051
5156
8859
6220
5461
5138
5106
4660
3667
4342
5280
4817
4488
3735
7661
4284
6101
5684
4953
4351
5492
4800
4835
5435
4024
4677
4333
5472
5538
7450
4822
7147
4314
4345
5092
4723
3632
5101
6060
4896
4599
4471
4933
6128
3504
8704
4373
4700
6533
3791
5484
4437
5105
4982
4753
5108
4009
4860
4649
5575
4620
4808
4940
7195
6787
5507
4696
4138
5552
5591
7564
4665
5174
5309
5169
4964
4926
4929
5940
5568
3919
4770
5549
6055
4692
4298
5188
5771
5252
4462
3950
3263
3974
5032
2712
5474
5129
5372
2334
3244
3542
4724
4757
5361
3902
6106
5066
4538
5292
4945
5135
6429
4509
5021
5231
5417
4562
3645
4251
3625
5277
4875
7573
3887
6919
2900
2343
2762
3431
5234
4604
4613
5502
5619
4925
4196
2936
5450
3726
3407
4403
5506
4649
4553
4802
2253
4623
3832
3891
3371
5403
5968
5520
3940
5338
4918
5622
5503
4200
3594
5207
5557
7019
4346
6335
8348
4904
8203
3707
4280
2837
3966
3654
4738
3538
5179
4141
4731
6063
4735
4885
4248
3984
3994
4099
5063
4671
4575
4344
4815
3639
4251
5006
4636
2867
5787
5718
4808
3882
3348
4230
2610
4387
3909
3761
4882
4336
1870
3950
5030
9426
7469
5079
5879
5676
4823
4773
3712
4062
4795
5258
6896
3990
5377
5100
5393
4863
4974
6079
4387
5428
7423
4977
2879
7933
4996
4501
5876
5142
4194
4561
4218
2256
3791
3756
5418
4819
3824
5553
3551
4778
3640
4658
5097
5186
4240
4162
5452
4895
5510
8724
3995
3969
5381
4465
4362
3782
5808
3692
2847
6141
2892
5803
4965
3132
8446
5977
5964
4336
5500
4247
3756
4779
3953
3708
5231
3691
4456
4783
3903
6061
4248
9269
5481
4296
4506
3851
3064
5853
5086
3362
3207
5440
3401
4776
5569
1622
6354
4346
4852
5198
5940
5337
4242
5947
4400
5684
4284
3767
4677
3061
4131
5142
4467
4468
5820
4539
4690
8733
5194
4850
3253
9456
5179
4752
3066
6633
6136
4672
4520
5114
4238
5096
4376
4238
3408
4820
4103
3519
3240
3174
3852
4873
5208
3940
4361
4987
4814
4123
5509
6820
4694
4423
3340
3255
3583
3734
4963
3425
6361
3305
4689
4572
4739
4054
4265
4484
4278
6123
4799
4434
4652
6029
4659
5514
3484
2145
3990
3378
4804
5095
2563
4512
4529
5277
4635
3883
4450
4040
3661
3926
5656
4960
6343
6422
6241
12867
5037
3277
3137
3489
3416
4834
5227
4195
5889
3377
5010
7740
2607
4482
3644
4953
3341
4265
4574
4031
3799
5980
4309
5382
4963
4591
4898
5184
4059
4180
3703
2725
4889
3654
4622
5070
2463
4229
2766
5127
5885
6345
4531
4041
3996
4978
8996
4159
4820
5122
4631
4839
4162
3349
4273
4388
3840
2985
4147
4395
3890
4739
4797
2824
1842
5522
2949
4313
4209
4958
4149
5794
4622
5181
5221
4492
4102
3850
5264
3477
3006
4020
4092
2033
4949
4614
5061
5300
3731
4788
5033
4770
4644
4590
4026
5752
4315
2232
4228
3287
4032
3454
4456
4871
5185
3918
5208
6037
3592
3636
5390
4088
4823
3987
3138
3998
8661
2744
4949
5391
5365
3880
4565
4742
4320
5674
4749
3429
4197
4209
4377
3874
4113
5568
4225
7201
4236
3697
4474
4883
5002
5195
4694
4877
5389
3379
4854
3752
5048
4396
5934
3514
4224
3422
5371
5221
4079
5186
4197
3518
5000
3281
4679
5698
5401
4676
4405
4381
3790
3588
3586
2384
2763
4597
4201
4004
3066
6389
3938
3519
4667
3829
3734
4524
5662
4242
3975
4060
5292
6789
4667
3637
5493
4613
3623
3387
4333
3347
3087
3894
4341
3184
4110
5733
3165
6141
5293
4879
6532
5025
4734
2962
4028
2823
5362
3860
4739
3926
4423
4634
4349
4307
3791
5256
4822
2952
3848
4073
3677
4396
6107
5137
5310
4064
4726
7485
3834
3837
4433
3374
4455
6263
5249
3372
3235
4834
5011
3760
3065
4580
5096
4599
3858
4508
2903
4965
3946
3629
3816
5205
6191
4485
3981
4190
4770
3726
6573
3896
4529
5476
4087
4550
5632
8014
3815
5999
6978
3503
5952
4964
5234
4363
6812
2285
4648
5961
5564
4506
5561
4120
6222
4917
4580
5028
5345
3799
5999
4503
3346
4585
3937
3899
4571
4292
4342
4614
7278
3636
3382
3879
4657
6676
6290
5044
3559
6371
4076
4647
4738
2422
4519
5229
2401
8263
6000
3685
3695
4092
4120
3598
4146
5150
3690
6454
4048
4645
3783
4241
3467
7625
4409
3869
3310
4531
5318
3862
4529
4164
4996
3880
4576
1906
5024
5029
5226
4159
4361
4742
4159
4809
4592
5180
5185
[truncated: 10,761 more rows]
