# Supplementary material for: Membrane-mediated dimerization potentiates PIP5K lipid kinase activity
Source: eLife. 2022 Aug 17;11:e73747. doi: 10.7554/eLife.73747 (PMC9470164; doi:10.7554/eLife.73747)
Supplement: Figure 4—source data 7. [file elife-73747-fig4-data7.xlsx]

## Sheet: Figure 4I
Figure 4I
time (sec)	intensity
0	11394
0.1	10876
0.2	9652
0.3	9387
0.4	9536
0.5	8886
0.6	9196
0.7	9872
0.8	9423
0.9	9375
1	9030
1.1	9163
1.2	8860
1.3	9827
1.4	10362
1.5	9617
1.6	9572
1.7	9159
1.8	6645
1.9	5987
2	5530
2.1	6226
2.2	6105
2.3	5299
2.4	5647
2.5	5191
2.6	5407
2.7	5061
2.8	5960
2.9	1973
3	2288
3.1	1936
3.2	1744
3.3	1905
3.4	2592
3.5	2462
3.6	1931
3.7	1609
3.8	2489
3.9	1643
4	1794
