# Supplementary material for: Membrane-mediated dimerization potentiates PIP5K lipid kinase activity
Source: eLife. 2022 Aug 17;11:e73747. doi: 10.7554/eLife.73747 (PMC9470164; doi:10.7554/eLife.73747)
Supplement: Figure 5—figure supplement 1—source data 1. [file elife-73747-fig5-figsupp1-data1.xlsx]

## Sheet: Figure - FS1
								Figure 5 - figure supplement 1A					Figure 5 - figure supplement 1B
								kinetics of lipid phosphorylation					kinetics of lipid phosphorylation
									1nM 5KA	2.5nM 5KA	5nM 5KA			2.5nM 5KA(D107R)	5nM 5KA(D107R)	10nM 5KA(D107R)
								time(sec)	PIP2/µm2	PIP2/µm2	PIP2/µm2		time(sec)	PIP2/µm2	PIP2/µm2	PIP2/µm2
								0	0	0	0		0	0	0	0
								5	1237.74	1599.03	1504.05		5	1494.41	1512.59	563.386
								10	1463.25	2178.02	3060.89		10	1710.82	1999.34	1777.9
								15	2002.02	3270.68	5946.3		15	1921.44	2372.34	2581.47
								20	2669.25	4639.82	9252.31		20	2105.96	2702.92	3689.24
								25	3424.16	6216.55	12464.5		25	2325.06	3138.33	4741.81
								30	4279.64	7931.5	15860.8		30	2417.74	3575.35	5750.47
								35	4971.66	9674.57	18267.7		35	2488.99	4029.76	6778.09
								40	5904.54	11539.1	20829.2		40	2850.23	4506.01	7413.43
								45	6904.8	13070.8	22808.3		45	3113.55	5025.28	8841.44
								50	7729.11	14716.5	24024.7		50	3263.2	5418.47	9886.73
								55	8485.83	16546.2	24901.5		55	3471.69	5851.9	11080.3
								60	9627.02	17860.4	25359.4		60	3761.6	6412.1	11930.3
								65	10670.5	19322.8	25657.6		65	3943.16	6926	12934.5
								70	11423	20554.7	25900.3		70	4003.17	7508.54	13745.1
								75	12245.1	21479.3	26389.7		75	4360.64	8089.46	14420.5
								80	12895.4	22702.7	26132.2		80	4616.45	8515.06	15331.9
								85	13982.3	23604.2	26637.7		85	4817.36	9037.1	16323.8
								90	14439	24355.9	26648.5		90	5120.62	9747.78	17368.6
								95	15667	24848	26401.9		95	5235.6	10274.1	17402.1
								100	16444	25140.7	26476		100	5523.16	10586.5	18451.6
								105	17101.7	25619.1	26546.5		105	5667.52	11210	19136
								110	17938.1	25828.9	26415.5		110	5936.01	11486.6	19434.7
								115	18428.5	25850.9	26813.1		115	6193.36	12226.1	20173
								120	19151.5	26114.8	26804.2		120	6545.16	12490.8	20877.3
								125	19463.7	26163	26990.5		125	6670.94	13045.6	21317.1
								130	20533.7	26273.3	26797.2		130	6778.5	13524	21519.2
								135	21099.2	26212.7	27000.9		135	7186.41	13728.5	21942.7
								140	21789.7	26601.6	26723.9		140	7497.33	14603.9	22533.3
								145	21984.5	26372.4	27361.6		145	7589.54	14808.5	22735.2
								150	22673	26750.8	27047.2		150	7924.79	15417.8	23171.1
								155	23254.2	26700.1	27077.3		155	7992.53	15765.3	23670.8
								160	23588.9	26741.1	27492.4		160	8403.8	16284.6	23745.9
								165	24187	26874.8	27777.8		165	8838.39	16697.2	23988
								170	24178.7	26905.3	27721.3		170	8955.11	16952.1	24303
								175	24595.6	26860.6	27182.7		175	9183.09	17442	24830.9
								180	24788.6	26810.9	27179.8		180	9472.52	17682.1	24601.2
								185	25016.8	26774.8	27301		185	9676.1	18150.4	24958.3
								190	25152.5	27053	27101.8		190	9840.22	18287.8	25411
								195	25639.5	26645	26951.1		195	10187.1	18640.7	26159.3
								200	25412.5	27275.5	27211.4		200	10525.5	19407	26063
								205	26000.5	27445.9	27198.9		205	10663.7	19475.3	26001.7
								210	25932.3	27228.4	26977.5		210	11167.8	19758.4	25862.4
								215	26180.8	27163.3	26603.2		215	11401.5	19910.6	25898.5
								220	26408.9	27083.4	26899.2		220	11457.2	20366.1	26308.7
								225	26406.7	27089.1	27105.6		225	11712.5	20557.1	26102.5
								230	26188.5	27344	26983		230	12260	20496.3	26481.1
								235	26145.2	27041.9	27022.8		235	12353.5	20911	26431
								240	26278.6	27193.4	27492.9		240	12831.8	20910.4	26361.3
								245	26188.1	27430.6	27093.7		245	12848.4	21718.7	26808.8
								250	26455.9	27434.7	26981.4		250	13077.9	22030.9	26958.7
								255	26441	27229.4	26889		255	13296.4	22085.6	26004.4
								260	26442.1	27599.4	26781.7		260	13476.9	22064.7	27104.2
								265	26813.4	27707.7	26863.3		265	13533.8	22471.8	27624.7
								270	26792.3	27383.7	26974		270	14106.9	22676.8	27001.6
								275	26864.5	27689	27233.9		275	14270.7	22877	26870.9
								280	26955	27382.1	26952		280	14428.7	22857.5	26715
								285	26869.5	27420.8	27084.3		285	14793.3	22907.3	26873.8
								290	27152	27017.3	26918.5		290	14837.8	23276.4	27014.8
								295	27050.7	27322.1	26912.6		295	15072.6	23459.5	27095.8
								300	27096.2	27777.8	26992.1		300	15279.6	23405.8	27206.6
								305	26880.7	27096.5	27109		305	15782.8	23570.8	27489.3
								310	26979.2	27215.4	27014.3		310	15927.4	23955.4	27308.9
								315	26827.9	27105.8	26789.5		315	16281.8	23980.9	26903.4
								320	27030.8	27076.7	26539.7		320	16251	24545.5	27331.8
								325	26778.1	27410.5	26570.9		325	16557.8	24490	27055.8
								330	26986.3	27125.2	26797.9		330	16630.6	24777	27387.4
								335	27164.8	27051.5	26797.7		335	16785.7	24534.4	26758.5
								340	26863.1	27088.2	26998.7		340	17441.3	24957.9	27469.6
								345	27040.2	27418.2	26821.5		345	17334	24573.8	27261
								350	26895.8	27165.3	27049.5		350	17452.6	25340.8	27530.2
								355	27039	27247	26889.8		355	17759.7	25233.5	27396.9
								360	26808	26951.1	27247.7		360	17743	25648	27335.3
								365	27023.6	27058.8	26689.7		365	18086.9	25274.7	27135.7
								370	26989	27105.5	26859.1		370	18156.5	24902.5	27023
								375	27395	27201.3	27095.6		375	18402.8	25080.4	27336.3
								380	27227.7	26998.3	27051.6		380	18713.8	25525.2	27111.2
								385	27092.4	27200.1	26760.3		385	18990.3	25523.7	27593.2
								390	27278.4	27058.7	26731.5		390	19178.7	25780.9	27450.2
								395	27220.9	27346.2	26808.5		395	19073.2	25507.5	27393.4
								400	27131.2	27051.3	27014.9		400	19214.3	25562.5	27721.7
								405	27145.5	27249.1	26727.6		405	19549.4	25605.1	27612.1
								410	27339.8	26855.7	26916.4		410	19562.4	25683.2	27452.8
								415	27360.2	27292	26765.4		415	19364.2	25557.8	27080.8
								420	27137.5	27060.2	26888.6		420	20128.5	26194.6	27287.5
								425	27045.9	26827	26497.7		425	20153.4	26191.2	26901.5
								430	27215.3	27097.4	26573.6		430	20065.1	26304.9	26983.9
								435	27573.3	27071.2	26743.8		435	20267.1	26042.6	27469.1
								440	27528.6	27321.2	26943		440	20645	25903.4	27361
								445	27165.9	27081.2	26614.2		445	20756.9	26439.3	27685.8
								450	27331.7	27515	26720.1		450	20567.7	26244.8	27689.2
								455	27385.4	26963.9	26337.7		455	20604.3	25914	27396.5
								460	26751.9	26827.1	26280.9		460	21041.2	26508	27555.3
								465	27424.9	26863.1	26402.9		465	21049.5	26612.4	27200.2
								470	27253.3	27052.6	26640.5		470	20938.1	26138.7	27175.8
								475	27414.4	27137.9	26806.4		475	21337.7	26801.1	27182
								480	27439.2	27017.7	26499.8		480	21469.2	26505.8	27078.3
								485	27473	27164.4	27077.3		485	21797.8	26491.5	27141.6
								490	27290.2	27175.5	26405.4		490	21568.3	26569.6	26839.5
								495	27333.2	26997.6	26281		495	21736.1	26850.6	27574.7
								500	27401.3	27134.2	26702		500	22018.6	26444.8	27492.6
								505	27237.5	26934.5	26511		505	22245.7	26915	27417.6
								510	27545.4	26841.7	26656.9		510	21925.9	26841.2	27136.3
								515	27054	26777.1	26333.2		515	22157	26625.9	26940.7
								520	27062.6	26931.8	26804.1		520	22424.7	27304.7	27433.9
								525	27325.9	27226.8	26528.5		525	22541.5	26817.2	27267
								530	27350.2	26833.5	26830.4		530	22403.2	27325.5	27036.2
								535	27699.4	26969.9	26495.8		535	22758.8	26956.8	27051.1
								540	27756.8	27183.4	26266.6		540	22723.3	27092.5	27251.7
								545	27433.5	26676.6	26330		545	23062.7	26930.7	27633.3
								550	27207.7	26736.8	26217.8		550	23178.4	27192.6	27496.2
								555	27387.2	27003.3	26368		555	22901.4	27132.2	27346.7
								560	27099.9	27029.1	26696.8		560	23282	26715.2	27163
								565	27095.9	27292.3	26478.3		565	23320.5	27156	27250.8
								570	27248.6	26968.8	26475.5		570	23359.7	27318.7	27136.2
								575	27178.5	27005.5	26570.5		575	23574.3	27132.8	27363
								580	27364	27098.6	26551.5		580	23099.5	26811.7	26734.6
								585	27379.1	27108.4	26376		585	23698.7	26995.4	27006.3
								590	27212.6	26583.7	26510.5		590	23524.5	27028.7	27155.2
								595	27777.8	27248.8	26045.1		595	23736	26930.2	27090.7
								600	27364.9	26783.8	26296		600	24108.4	26990.8	27289.9
								605	27429.6	27179.5	26501.3		605	23827.1	27027.9	27176.7
								610	27554.2	27162.9	26731.4		610	24229.5	27132.8	27219.3
								615	27439.7	27051.7	26419.1		615	24306.8	27130.7	27303.3
								620	27112.3	27008.1	26125.1		620	23812	26654	26577.5
								625	27353.7	26709.2	26447.6		625	24369.7	26777	26997
								630	27573	26687.9	26453.1		630	24737.6	27214.6	27235.8
								635	27627.5	26794.8	26557		635	24060.7	27497.4	27044.4
								640	27237.5	26832.4	26364.4		640	24239.3	27083.5	27279.8
								645	27136.6	27016.5	26032.7		645	25022.7	27229.5	27319.1
								650	27227.7	26888	26294.2		650	24874.9	27748.8	27172.8
								655	27296.1	26951.3	26458.8		655	24729.3	27069.9	27421.2
								660	27350.1	27004.6	26299.8		660	24855.8	27318	27380.6
								665	27350.5	27336.7	26208.2		665	24873.2	26586.1	27329.5
								670	27270.4	26890.5	26623.3		670	24769.5	27071.3	27381.5
								675	27281.7	26851.9	25997.2		675	25453.2	26834.5	27372.4
								680	27253.9	26858	25998.1		680	24904.2	26991.4	27390.9
								685	26801.9	27486	26227.2		685	24827.3	27437.2	27669.6
								690	27269	26999.6	26585.2		690	24733.7	27054.1	27028.9
								695	27289.3	27080.1	26211.8		695	24846.3	27034.4	27095.4
								700	27413.3	26760.8	26595.5		700	25213.8	26939.2	27777.8
								705	27029.7	26892.6	26392.6		705	25158.5	27402.2	27215.3
								710	27571.1	26910.7			710	25144.7	26911.4	27228.5
								715	27374.9	26903.5			715	25398.8	27194	26921
								720	27049.6	27051.8			720	25553.4	27398.8	27352.5
								725	27442.5	27121			725	25914	27561.5	27015.9
								730	27488.7	26853.5			730	25475.7	27161.4	26817.4
								735	27416.4	26932.3			735	25560.6	27359.6	26931.4
								740	27456.2	26825			740	25787.6	27349.8	27122.2
								745	27439.1	26897.3			745	25605.6	27515.3	27333.3
								750	27475.8	26695.1			750	25786.8	27519.2	27137.9
								755	26788	26709.2			755	25550.6	27408	27385.8
								760	27361.8	27198.9			760	25661.6	27254.8	27092.8
								765	26880.7				765	25946.7	27649.2
								770	26901.8				770	25748.4	27582.3
								775	27464				775	26349.4	27777.8
								780	27357.6				780	26221.1	27524.4
								785	26848.5				785	25870.4	27137.2
								790	27538.5				790	26176.5	27284.1
								795	27440.3				795	25999.7	27358.2
								800	27475.8				800	25929.1	27507.4
								805	27256.4				805	26121.8	27715.8
								810	27465.6				810	25666.9	27411.9
								815	27302.7				815	26202	27527.7
								820	27024.7				820	26151.3	27300.3
								825	27362.5				825	26447.8	27502.8
								830	27440.9				830	25977.2	27570.2
								835					835	26042.5	27382.8
								840					840	26199.5	27548.1
								845					845	26161.4	27527.2
								850					850	26435.1	27102.1
								855					855	26620.9	27699.4
								860					860	26467.5	27739.7
								865					865	26331.3	27658.5
								870					870	26424.4	27560.9
								875					875	26503	27416
								880					880	26819.8	27460.3
								885					885	26335.8	27681.2
								890					890	26636.4	27388.7
								895					895	26214.2	27679.3
								900					900	26657.2	27367.8
								905					905	26389.6	27459
								910					910	26619.5
								915					915	26451.8
								920					920	26916
								925					925	26294.7
								930					930	26075
								935					935	27069
								940					940	26921.2
								945					945	27082.2
								950					950	27179.3
								955					955	26912
								960					960	26800.4
								965					965	27501.5
								970					970	27030.6
								975					975	27089.3
								980					980	26988.5
								985					985	27176.2
								990					990	26493.7
								995					995	27413.8
								1000					1000	26816.3
								1005					1005	27373.2
								1010					1010	27325.8
								1015					1015	27611.6
								1020					1020	27460.2
								1025					1025	27166.4
								1030					1030	27356.2
								1035					1035	27488.3
								1040					1040	27099.8
								1045					1045	27685.3
								1050					1050	27220.4
								1055					1055	27155
								1060					1060	27625
								1065					1065	27285.4
								1070					1070	27022.6
								1075					1075	27468.2
								1080					1080	27407.9
								1085					1085	27383.6
								1090					1090	27611
								1095					1095	27263.4
								1100					1100	27356.7
								1105					1105	27424.7
								1110					1110	27689.7
								1115					1115	27624.6
								1120					1120	27563.2
								1125					1125	27433.4
								1130					1130	27679.4
								1135					1135	27682.4
								1140					1140	27499.9
								1145					1145	27777.8
								1150					1150	27044.2
								1155					1155	26638
								1160					1160	27555.9
								1165					1165	27336.3
								1170					1170	27487.3
								1175					1175	27302.2
								1180					1180	27171.8
								1185					1185	27636.8
								1190					1190	27037.9
								1195					1195	26948.2
								1200					1200	27098.9
								1205					1205	27214.8
								1210					1210	27265.6
								1215					1215	27649.2
								1220					1220	27567.2
								1225					1225	27487.5
								1230					1230	27556.3
								1235					1235	27491.2
								1240					1240	27310.3
								1245					1245	27266.5
								1250					1250	27635.4
								1255					1255	27301.1
								1260					1260	27135.8
								1265					1265	27369
								1270					1270	27455.4
