# Supplementary material for: Membrane-mediated dimerization potentiates PIP5K lipid kinase activity
Source: eLife. 2022 Aug 17;11:e73747. doi: 10.7554/eLife.73747 (PMC9470164; doi:10.7554/eLife.73747)
Supplement: Figure 5—figure supplement 2—source data 1. [file elife-73747-fig5-figsupp2-data1.xlsx]

## Sheet: Figure - FS2
Figure 5 - figure supplement 2A				Figure 5 - figure supplement 2B				Figure 5 - figure supplement 2C
time (sec)	G(t)	fit		mNG-5KB TIRF intensity	FSC density (5K/µm2)			mNG-5KB(D51R) TIRF intensity	FSC density (5K/µm2)
1e-05	0.62997	1		28754.8	178.718			1926.38	178.718
1.04e-05	0.94162	0.99963		3157.55	51.7002			365.702	51.7002
1.08e-05	1.3877	0.99926		1726.19	6.48988			5962.55	444.082
1.12e-05	0.83105	0.9989		15942.5	78.5352			273.498	6.48988
1.16e-05	1.0238	0.99854		334.277	0			1240.09	78.5352
1.2e-05	0.56131	0.99818						250	0
1.24e-05	1.2755	0.99782
1.28e-05	0.80449	0.99747
1.36e-05	0.84539	0.99677
1.44e-05	0.72814	0.99608
1.52e-05	1.1345	0.9954
1.6e-05	1.7163	0.99473
1.68e-05	1.0483	0.99407
1.76e-05	0.99713	0.99342
1.84e-05	0.82844	0.99278
1.92e-05	1.1587	0.99215
2e-05	0.80563	0.99153
2.08e-05	1.3197	0.99091
2.16e-05	0.90902	0.99031
2.24e-05	1.1455	0.98971
2.32e-05	0.73524	0.98912
2.4e-05	1.5865	0.98854
2.48e-05	0.7408	0.98797
2.56e-05	1.2316	0.98741
2.72e-05	0.87767	0.9863
2.88e-05	0.83892	0.98523
3.04e-05	1.2034	0.98419
3.2e-05	1.0529	0.98317
3.36e-05	0.92264	0.98219
3.52e-05	1.0572	0.98123
3.68e-05	1.1386	0.9803
3.84e-05	1.0561	0.97939
4e-05	1.2443	0.97851
4.16e-05	0.93242	0.97765
4.32e-05	1.0299	0.97681
4.48e-05	1.1011	0.976
4.64e-05	1.501	0.9752
4.8e-05	1.1364	0.97443
4.96e-05	1.06	0.97368
5.12e-05	1.0298	0.97295
5.44e-05	1.1715	0.97154
5.76e-05	1.0141	0.97021
6.08e-05	1.0081	0.96894
6.4e-05	0.9238	0.96774
6.72e-05	1.1211	0.96659
7.04e-05	1.0471	0.9655
7.36e-05	0.97655	0.96446
7.68e-05	1.0895	0.96347
8e-05	1.128	0.96252
8.32e-05	1.0398	0.96162
8.64e-05	1.1975	0.96076
8.96e-05	0.86984	0.95993
9.28e-05	0.92485	0.95914
9.6e-05	1.0715	0.95839
9.92e-05	0.8935	0.95766
0.0001024	1.2967	0.95696
0.0001088	1.1082	0.95565
0.0001152	0.92674	0.95443
0.0001216	1.019	0.9533
0.000128	0.97861	0.95224
0.0001344	0.96414	0.95125
0.0001408	1.0185	0.95032
0.0001472	0.98574	0.94943
0.0001536	0.93195	0.94859
0.00016	0.87287	0.94779
0.0001664	0.99076	0.94703
0.0001728	1.0299	0.94629
0.0001792	1.0841	0.94559
0.0001856	1.0597	0.9449
0.000192	1.0475	0.94424
0.0001984	1.0098	0.9436
0.0002048	0.95399	0.94297
0.0002176	1.0024	0.94176
0.0002304	0.94646	0.94059
0.0002432	1.0056	0.93946
0.000256	0.99341	0.93835
0.0002688	1.0014	0.93727
0.0002816	0.97728	0.93621
0.0002944	0.89951	0.93515
0.0003072	1.0925	0.93412
0.00032	0.93135	0.93309
0.0003328	0.94276	0.93206
0.0003456	0.91349	0.93105
0.0003584	1.0342	0.93004
0.0003712	0.89125	0.92903
0.000384	0.92927	0.92803
0.0003968	0.96508	0.92703
0.0004096	0.9575	0.92604
0.0004352	0.94778	0.92406
0.0004608	0.94891	0.92209
0.0004864	0.92453	0.92013
0.000512	0.89044	0.91818
0.0005376	0.93431	0.91624
0.0005632	1.0039	0.9143
0.0005888	0.96102	0.91238
0.0006144	0.90134	0.91046
0.00064	1.0184	0.90855
0.0006656	0.93916	0.90665
0.0006912	0.91809	0.90476
0.0007168	0.9628	0.90287
0.0007424	0.93333	0.901
0.000768	0.92908	0.89913
0.0007936	0.90102	0.89726
0.0008192	0.88054	0.89541
0.0008704	0.87457	0.89172
0.0009216	0.91331	0.88807
0.0009728	0.89406	0.88445
0.001024	0.84913	0.88085
0.0010752	0.88937	0.87728
0.0011264	0.86705	0.87375
0.0011776	0.89772	0.87024
0.0012288	0.86227	0.86675
0.00128	0.90473	0.8633
0.0013312	0.82959	0.85988
0.0013824	0.85195	0.85648
0.0014336	0.86111	0.8531
0.0014848	0.87131	0.84976
0.001536	0.84731	0.84644
0.0015872	0.80064	0.84315
0.0016384	0.82607	0.83988
0.0017408	0.81643	0.83342
0.0018432	0.8151	0.82705
0.0019456	0.83596	0.82079
0.002048	0.82976	0.81462
0.0021504	0.79114	0.80854
0.0022528	0.78336	0.80255
0.0023552	0.7945	0.79665
0.0024576	0.79045	0.79083
0.00256	0.77928	0.7851
0.0026624	0.78076	0.77945
0.0027648	0.73652	0.77388
0.0028672	0.76543	0.76839
0.0029696	0.77016	0.76298
0.003072	0.75927	0.75765
0.0031744	0.75769	0.75238
0.0032768	0.72376	0.7472
0.0034816	0.73097	0.73703
0.0036864	0.73486	0.72714
0.0038912	0.71984	0.7175
0.004096	0.71069	0.70812
0.0043008	0.71074	0.69899
0.0045056	0.69715	0.69008
0.0047104	0.66691	0.6814
0.0049152	0.68257	0.67294
0.00512	0.68597	0.66468
0.0053248	0.67133	0.65662
0.0055296	0.66715	0.64876
0.0057344	0.66472	0.64108
0.0059392	0.64111	0.63358
0.006144	0.64008	0.62626
0.0063488	0.63382	0.6191
0.0065536	0.64917	0.6121
0.0069632	0.62594	0.59858
0.0073728	0.60097	0.58563
0.0077824	0.59831	0.57324
0.008192	0.58965	0.56136
0.0086016	0.5792	0.54996
0.0090112	0.57708	0.53901
0.0094208	0.5682	0.5285
0.0098304	0.56729	0.51838
0.01024	0.55901	0.50865
0.01065	0.53852	0.49927
0.011059	0.52588	0.49023
0.011469	0.5265	0.48152
0.011878	0.50883	0.47311
0.012288	0.5224	0.46498
0.012698	0.50696	0.45713
0.013107	0.49714	0.44955
0.013926	0.49658	0.4351
0.014746	0.46464	0.42156
0.015565	0.45252	0.40883
0.016384	0.44126	0.39685
0.017203	0.43082	0.38555
0.018022	0.42727	0.37488
0.018842	0.41488	0.36478
0.019661	0.39345	0.35521
0.02048	0.39197	0.34613
0.021299	0.36817	0.33751
0.022118	0.3828	0.3293
0.022938	0.37635	0.32148
0.023757	0.36318	0.31403
0.024576	0.35157	0.30691
0.025395	0.35085	0.30011
0.026214	0.32893	0.2936
0.027853	0.33596	0.2814
0.029491	0.31709	0.27017
0.03113	0.31074	0.25981
0.032768	0.2926	0.25021
0.034406	0.29014	0.24129
0.036045	0.27641	0.23299
0.037683	0.25351	0.22524
0.039322	0.25118	0.21799
0.04096	0.24368	0.21119
0.042598	0.23312	0.2048
0.044237	0.2314	0.19879
0.045875	0.2072	0.19312
0.047514	0.19669	0.18776
0.049152	0.1927	0.1827
0.05079	0.18589	0.1779
0.052429	0.17692	0.17334
0.055706	0.17941	0.1649
0.058982	0.16009	0.15724
0.062259	0.15775	0.15026
0.065536	0.15183	0.14388
0.068813	0.13948	0.13801
0.07209	0.13798	0.1326
0.075366	0.14319	0.12761
0.078643	0.13319	0.12297
0.08192	0.13122	0.11866
0.085197	0.12825	0.11464
0.088474	0.12335	0.11089
0.09175	0.1157	0.10737
0.095027	0.1067	0.10407
0.098304	0.10173	0.10097
0.10158	0.091299	0.098043
0.10486	0.087648	0.095284
0.11141	0.079555	0.090206
0.11796	0.076457	0.085643
0.12452	0.076915	0.081518
0.13107	0.05756	0.077773
0.13763	0.047579	0.074357
0.14418	0.043552	0.071228
0.15073	0.047032	0.068352
0.15729	0.04955	0.065699
0.16384	0.039254	0.063244
0.17039	0.038012	0.060967
0.17695	0.032431	0.058847
0.1835	0.026166	0.05687
0.19005	0.026143	0.055022
0.19661	0.031853	0.05329
0.20316	0.02884	0.051663
0.20972	0.027572	0.050133
0.22282	0.029893	0.04733
0.23593	0.021357	0.044823
0.24904	0.027207	0.042569
0.26214	0.028426	0.04053
0.27525	0.022586	0.038678
0.28836	0.017269	0.036988
0.30147	0.014974	0.035439
0.31457	0.01094	0.034015
0.32768	-0.0012712	0.032701
0.34079	0.0064824	0.031484
0.35389	0.0058155	0.030355
0.367	0.0051157	0.029304
0.38011	-0.0066198	0.028323
0.39322	-0.0035	0.027406
0.40632	0.0031322	0.026547
0.41943	0.020134	0.025739
0.44565	0.020227	0.024264
0.47186	0.0097179	0.022948
0.49807	0.0039692	0.021768
0.52429	0.0087182	0.020703
0.5505	0.0098657	0.019737
0.57672	-0.0037624	0.018858
0.60293	-0.013883	0.018053
0.62915	-0.011334	0.017315
0.65536	-0.013478	0.016634
0.68157	-0.014462	0.016005
0.70779	-0.0032309	0.015422
0.734	0.009359	0.014879
0.76022	0.0090533	0.014374
0.78643	0.026488	0.013902
0.81265	0.039681	0.01346
0.83886	0.046387	0.013045
0.89129	0.017016	0.012287
0.94372	0.0098287	0.011613
0.99615	0.014778	0.011009
