# Supplementary material for: Membrane-mediated dimerization potentiates PIP5K lipid kinase activity
Source: eLife. 2022 Aug 17;11:e73747. doi: 10.7554/eLife.73747 (PMC9470164; doi:10.7554/eLife.73747)
Supplement: Figure 5—source data 1. [file elife-73747-fig5-data1.xlsx]

## Sheet: Figure 5A
Figure 5A
	5 nM reactions				2.5 nM reactions				1 nM reactions
time (sec)	rxn 1	rxn 2	rxn 3		rxn 1	rxn 2	rxn 3		rxn 1	rxn 2	rxn 3	rxn 4		Kinetic trace from reaction 1 (rxn1) is diplayed in figure 5A
0	0	0	0		0	0	0		0	0	0	0
5	52	1518	1506		124	500	40		204	869	81	322
10	1454	4887	3322		952	1653	1450		762	2424	570	616
15	5077	9613	6612		2687	3487	2306		1204	3159	996	1031
20	9892	14033	10954		4879	6114	2905		1902	4081	1640	1560
25	14620	18756	16542		7444	8840	3658		2605	5056	2155	2208
30	19536	23968	22160		10057	11882	4906		3528	5987	2988	2821
35	23651	26886	27374		12975	15144	6060		4359	7195	3785	3569
40	27633	30435	33246		15163	18233	7555		5358	8520	4705	4240
45	30986	33520	36500		18081	21270	9191		6342	9615	5425	5093
50	34583	36931	40298		20772	24188	10867		7372	10658	6385	5973
55	36944	39043	43358		23424	27156	12999		8459	11630	7390	6865
60	39373	41630	45014		25842	29559	15346		9613	12915	8234	7780
65	41543	43251	46544		28711	31792	17683		10774	13950	9215	8805
70	42910	44485	47064		30502	34269	20833		12193	15112	10388	9590
75	43940	45672	47612		33087	37267	23112		13383	16489	11445	10793
80	45456	46866	48026		34450	38939	25567		14649	17653	12513	11682
85	45684	47478	48704		36046	41294	28516		15736	18834	13770	12958
90	46415	48298	48386		38621	42809	30936		17145	20326	15007	14149
95	47253	47866	48666		39464	43678	33163		18539	21529	16113	15177
100	47816	48398	49004		40934	45114	34919		20033	22544	17516	15465
105	48376	50086	49466		41837	46861	37285		21355	24004	18927	16699
110	48504	50296	49642		43113	47593	39392		22801	25125	19958	17735
115	49468	49888	50346		44079	48827	41729		23852	25657	21008	18447
120	48672	50944	49848		44986	49006	42784		25605	27103	22554	19655
125	50207	51235	49936		45790	50031	44613		27089	28599	23571	20723
130	49995	51331	50430		46160	50197	45195		28006	29565	25117	21864
135	50290	51584	51166		48836	51181	46642		29576	31127	27102	22824
140	49115	52084	50608		47326	50895	47828		30969	31962	27280	23437
145	50457	51809	50918		47587	51643	48093		32034	32990	28677	24223
150	51393	51761	51184		48504	51918	49135		33209	33935	29600	25146
155	51740	51978	50486		48321	52310	49462		34429	35356	31047	26037
160	51757	52413	51782		48784	52507	49585		34438	36693	32128	27515
165	51634	51008	51660		48892	52943	49629		37001	37743	33488	27653
170	51755	53204	51600		49646	52474	49776		38230	38047	34430	28726
175	52625	53285	51698		49530	53121	50186		39192	39657	35370	29080
180	52422	52575	51790		49928	53166	50593		39526	40866	36492	31128
185	52051	52369	51516		50218	53450	50476		40543	41670	37604	31539
190	52524	53593	52442		50047	53325	50928		42162	42262	38165	31098
195	52434	52589	51750		50260	53536	51197		42964	43200	39488	32566
200	50652	52455	52280		50926	53624	51893		43940	44758	40308	33158
205	52644	52889	52456		50956	54294	51268		45098	45142	41191	33570
210	52904	52736	52482		50896	53998	51745		44972	46211	42116	32970
215	53267	52796	52614		51063	53739	51073		46529	47225	43163	35287
220	53287	53347	52824		51484	53705	51910		47133	47090	43894	35621
225	52827	53113	52774		51840	53969	51580		48005	47931	44349	36647
230	53070	53228	52578		52118	54139	52481		48037	48384	45392	36917
235	53278	53814	53244		52203	53624	51669		49353	49968	46269	37599
240	53535	53753	53046		52141	53764	51614		49470	50218	46315	37991
245	53916	53800	53468		51970	54964	52384		49664	51192	47040	38989
250	52622	53922	53306		52028	53238	52074		50601	51432	47553	38914
255	53419	54022	52574		52184	53167	52488		50956	51966	48667	39140
260	53126	54383	53560		52382	53656	52271		52100	51251	48825	40357
265	53916	53966	53024		52923	54744	52225		52011	52344	49480	39906
270	52854	54511	52618		53010	54310	52469		50372	52950	49893	40970
275	53326	53324	53080		52592	53882	52189		53140	52757	50016	41373
280	53113	54004	52872		52834	53733	53079		52892	53331	50655	41613
285	53898	54789	52604		52452	54243	52959		53748	53241	50779	42174
290	53514	54929	53390		52624	53669	53489		52988	53191	51052	42955
295	55555	54391	53776		53528	54275	52439		53055	53356	51350	43359
300	52944	53953	54138		53569	53806	52412		53878	53060	51720	43996
305	52894	55228	53516		53347	53746	53002		53620	53683	51475	44321
310	52999	55471	53564		53362	53993	53930		54119	53182	52306	45510
315	53109	54361	53800		53686	53766	53205		53865	54172	52302	45221
320	53198	52737	52448		53330	53703	52041		53772	53734	52202	45602
325	53200	55184	53722		51920	54143	52895		53706	54327	52503	45866
330	53130	54686	53718		53927	53975	52471		54259	53928	52763	46049
335	53818	55329	53532		54033	54222	53572		54253	53754	53003	46430
340	53636	55336	53492		53956	53931	53096		54730	53977	51730	46653
345	53857	54570	53468		54052	54024	52958		54811	53706	52237	48079
350	53525	54828	53780		54081	54126	52802		54471	53647	53331	46844
355	53709	54832	54164		54370	54004	53119		55141	54093	52393	47027
360	53790	54915	54066		54621	54338	53101		55017	55372	53469	47384
365	53828	54604	53706		53992	54066	53460		54568	54005	53317	49523
370	54007	55555	53814		53847	54000	54018		54786	54242	53437	48011
375	54182	54805	53870		53858	54414	52731		53970	54158	53796	48419
380	53885	54262	54416		54339	54098	54186		54865	53980	53544	48607
385	54526	55211	53872		54328	54447	54181		55100	55118	52932	49462
390	54068	54442	54144		54410	54358	53487		55088	54841	53421	49391
395	54068	54613	53392		54865	54673	54067		54682	54096	53414	49330
400	54136	54353	53894		53815	54584	53527		54558	54182	53510	49680
405	54324	54249	54086		55010	54431	53257		54846	54210	53864	50522
410	54743	54686	54048		54260	54337	53357		54988	54964	53501	50912
415	54431	54440	53542		53144	54984	53033		54629	54420	53483	49968
420	53614	53946	53450		54415	54520	53123		55555	54456	53673	51014
425	54609	53976	53934		54525	54567	54054		55462	54248	54110	50730
430	54229	54472	53908		54194	54024	53511		54754	53936	53930	50685
435	53853	54446	53244		54505	54348	53428		54864	55556	53577	50955
440	53587	54442	54296		55209	53998	53852		55303	54801	53759	50802
445	54148	54065	53246		53271	54165	53480		54955	54824	53767	51007
450	54501	54175	54018		54698	54795	54845		54728	54307	54126	51017
455	52602	54670	53750		54474	54050	53948		54777	54880	52575	52185
460	54192	54779	53648		54770	54925	54242		53797	55063	53725	52175
465	55000	54457	54112		54633	54811	54081		54454	54548	53967	52573
470	53889	54719	53702		54548	54992	53773		53983	54410	53967	51311
475	54400	53244	53412		54756	55120	53943		54488	54282	53516	51188
480	54257	55080	53952		54561	55127	53089		55453	54400	52777	51155
485	53996	54304	53502		55555	55122	52995		54448	54983	53556	51411
490	54454	54748	53330		55554	53133	53678		55136	54765	54232	51746
495	54574	54713	53690		54951	54280	53400		54814	54432	53611	52180
500	53941	54471	54936		54553	55274	53484		54251	53300	53601	52018
505	54047	54871	53948		54478	55330	54419		54058	54131	53039	51866
510	54546	55106	53716		54437	54562	54157		54708	54693	53426	52170
515	54913	53924	53838		54655	54948	53406		54251	53881	53482	52058
520	54106	54726	54320		54441	54318	53899		54281	53998	52927	52841
525	53914	54878	53800		54629	54952	55125		54244	54386	53112	52613
530	54328	54251	54130		54595	54825	54615		54103	53932	53472	53163
535	54085	54946	53964		54444	54472	53592		54456	54018	53088	53062
540	54569	54881	53940		54175	55122	54401		54156	54010	53001	53172
545	53648	54669	53944		54457	54964	54079		54021	54473	53833	52914
550	53366	54176	54996		54021	54803	54167		54246	54624	52756	52499
555	53738	54363	54650		54074	55528	54276		54118	53968	53143	53768
560	53888	53948	54696		53766	54891	54595		53849	54600	52952	52775
565	53379	54605	53902		54455	55130	54736		53969	54334	52912	53911
570	53542	54354	54014		54597	54999	54147		53943	54338	53121	52415
575	53217	54571	55014		54137	55291	54514		53923	54445	53571	54328
580	52928	54545	54478		53724	55105	54337		53842	54110	53243	52253
585	53253	54430	54836		53977	55157	54292		54022	54326	55555	52547
590	53454	53756	54038		53833	55249	54445		54210	55143	53019	52409
595	52984	54148	55430		54373	55555	54406		54045	54404	52871	53177
600	55293	54229	55290		54294	55464	54144		54179	53992	52751	53421
605	53073	54652	54530		54182	55381	55556		54460	54206	52856	53542
610	52638	53273	55026		54039	54922	53956		54554	53863	52842	53661
615	53032	53102	54308		54157	54967	54475		54210	54399	52592	53024
620	52756	53520	54133		54148	54624	54135		54337	54209	52700	53998
625	53527	53359	54837		54091	54441	54378		54885	54450	53283	53403
630	52813	52892	53941		54531	54870	55239		54844	54465	53053	53579
635	53489	52705	55089		54070	55194	53534		54466	54277	52995	54152
640	52901	55475	53873		53900	55103	54431		54016	54351	52960	54013
645	53352	53304	55099		53885	55201	54505		54639	54682	53145	54035
650	53301	53229	53975		54083	54953	54215		54544	54318	53016	53626
655	53340	53403	54220		54392	55100	54662		54545	55064	52880	54345
660	53086	53432	54996		54200	54759	54619		54344	54659	52793	53541
665	53188	53538	55526		55010	54537	54427		54042	54754	53372	53723
670	53337	53383	54382		54476	54960	54703		54293	54474	52857	53357
675	53336	53210	54722		54107	54679	54100		53662	54616	53057	53271
680	53361	53368	54151		54385	54536	54563		53618	54626	53366	53093
685	52945	53598	54080		54066	54805	53863		53876	54869	52074	55167
690	53141	53859	53967		54199	54287	54445		54141	54152	52782	53646
695	53097	53446	53982		54454	55271	54197		54361	53876	53125	53311
700	53287	53399	54854		53975		54672		54740	54638	53171	53339
