# Supplementary material for: Membrane-mediated dimerization potentiates PIP5K lipid kinase activity
Source: eLife. 2022 Aug 17;11:e73747. doi: 10.7554/eLife.73747 (PMC9470164; doi:10.7554/eLife.73747)
Supplement: Figure 5—source data 2. [file elife-73747-fig5-data2.xlsx]

## Sheet: Figure 5B
Figure 5B
	5 nM reactions					2.5 nM reactions				1 nM reactions
time (sec)	rxn 1	rxn 2	rxn 3		time (sec)	rxn 1	rxn 2	rxn 3		time (sec)	rxn 1	time (sec)	rxn 2		Kinetic trace from reaction 1 (rxn1) is diplayed in figure 5B
0	0	0	0		0	0	0	0		0	0	0	0
5	134.596	20.8152	364.624		5	190.322	303.201	306.116		5	807.367	10	672.459
10	744.133	56.831	793.805		10	349.394	742.625	629.207		10	1333.86	20	1134.38
15	1270.35	67.5261	1009.34		15	148.626	978.391	792.294		15	1458.81	30	1244.18
20	1837.01	85.8079	1269.69		20	794.29	1270.11	924.423		20	1490.44	40	1452.67
25	2354.82	217.806	1585.03		25	944.899	1539.71	1066.67		25	1778.49	50	1800.77
30	2892.31	1841.21	1845.27		30	1167.26	1851.04	1210.11		30	1913.38	60	1999.49
35	3545.84	2258.23	2005.73		35	1433.45	2081.08	1338.03		35	2042.36	70	2288.23
40	4001.7	2647.91	2431.19		40	1588.03	2386.08	1426.44		40	2174.88	80	2488.94
45	4668.56	3130.92	2390.21		45	1904.63	2614.9	1678.55		45	2272.12	90	2848.1
50	5261.97	3487.59	3012.61		50	2001.78	2991.74	1799.69		50	2369.49	100	3136.67
54.999	5545.38	3780.42	3336.39		54.999	2399.77	3200.35	2004.24		54.999	2127.16	110	3366.25
59.999	6399.97	4407.7	3544.75		59.999	2587.25	3457.09	2105.25		59.999	2706.98	120	3617.16
64.999	7133.69	5033.51	3772.92		64.999	2824.31	3817.61	2039.71		64.999	2781.41	130	3891.22
69.999	7853.28	5479.23	4180.73		69.999	3148.71	3997.28	2467.09		69.999	2937.95	140	4074.24
74.999	8433.08	6328.38	4449.15		74.999	3328.17	4390.54	2627.85		74.999	3124.23	150	4357.81
79.999	9203.37	7007.78	4772.84		79.999	3474.76	4624.2	2881.78		79.999	3172.91	160	4635.72
84.999	9902.02	7539.03	5185.22		84.999	3853.13	4900.92	2958.37		84.999	3403.35	170	4959.57
89.999	10487.6	7805.79	5562.05		89.999	4100.7	5241.62	3144.04		89.999	3564.16	180	5196.31
94.999	11166.9	8765.09	5951.94		94.999	4405.56	5575.3	3283.85		94.999	3591.21	190	5504.49
99.999	11906.1	9628.14	6145.68		99.999	4681.16	5838.54	3510.25		99.999	3854.08	200	5736.65
104.999	12748.1	10231.3	6344.75		104.999	4670.03	6220.94	3669.33		104.999	3742.35	210	6060.02
109.999	13625.1	10860.3	7037.4		109.999	5191.16	6506.42	3848.85		109.999	3985.66	220	6321.07
114.999	14387.4	11605.1	7095.53		114.999	5401.52	6859.65	4008.19		114.999	4077.42	230	6489.07
119.999	14850.9	12384.9	7595.37		119.999	5535.48	7254.95	4213.6		119.999	4180.96	240	6880.34
124.999	15958.6	13074.7	7702.02		124.999	6096.38	7350.47	4343.32		124.999	4419.19	250	7158.88
129.999	16777.1	14079	8228.1		129.999	6232.68	7928.67	4498.36		129.999	4553.26	260	7239.17
134.999	17218.3	14864.9	8535.27		134.999	6525.1	8071.82	4694.37		134.999	4586.43	270	7700.04
139.999	18082.3	15436.6	8866.17		139.999	6999.74	8423.32	5122.03		139.999	4772.76	280	7847.14
144.999	18053	16267	9339.66		144.999	7018.26	8703.51	5018.49		144.999	4927.26	290	7973.6
149.999	19427.3	16942.2	9738.2		149.999	7305.07	9150.99	5178.32		149.999	5165.08	300	8304.96
154.998	20090.2	17977.5	9889.77		154.998	7664.03	9623.18	5388.2		154.998	5211.82	310	8723.08
159.998	21030.9	19146.8	10295.7		159.998	8137	9798.99	5578.05		159.998	5461.06	320	8964.01
164.998	21675.7	19890.6	10633.7		164.998	8152.23	10139	5935.84		164.998	5598.86	330	9323.67
169.998	22916.1	20916.1	11632.6		169.998	8286.05	11039.3	6020.75		169.998	5689.16	340	9687.9
174.998	23347.8	21334.3	11429.4		174.998	8527.44	10940.1	6159.83		174.998	5642.95	350	9792.82
179.998	24286.5	22720	12223.8		179.998	8985.12	11144.5	6276.05		179.998	5766.92	360	10095.3
184.998	24913.2	23609.8	12611.1		184.998	9243.42	11436.6	6648.36		184.998	6029.35	370	10611.7
189.998	25515.4	24236	12791.1		189.998	9563.12	12011.7	6877.14		189.998	6150.29	380	10711.6
194.998	26214.7	24915.8	13391.7		194.998	9826.98	12343.3	7004.49		194.998	6357.21	390	11037
199.998	27330.2	26035.8	14456.3		199.998	10308.9	12843.8	7271.78		199.998	6339.49	400	11473.5
204.998	27967.1	26757.3	14066.6		204.998	10574.2	13150.6	7408.58		204.998	6496.71	410	11785.8
209.998	28388	27657.7	14756.6		209.998	11422.2	13251.2	7667		209.998	6651.91	420	11973.8
214.998	29108.4	28145.9	15028.4		214.998	11749.3	13953.1	7750.6		214.998	6887.75	430	12327.1
219.998	30061.1	29309.3	15540.5		219.998	12374.1	14193.2	8050.02		219.998	6891.46	440	12523.8
224.998	30518.7	30190.7	15929.2		224.998	12290.7	14519.1	8346.96		224.998	7172.45	450	12891.1
229.998	31372.7	31169.9	15932.2		229.998	13177.2	14979.2	8541.51		229.998	7327.06	460	13247.7
234.998	32176.1	31738.7	16932.4		234.998	13441.5	15365.8	9018.61		234.998	7365.85	470	13579.6
239.998	32315.1	32899.8	17369.6		239.998	13478.3	15977.1	8854.79		239.998	7377.43	480	14174.3
244.998	32987.4	32969.6	17789.7		244.998	14277.9	16219	9342.81		244.998	7589.73	490	14056.5
249.998	33610	34052.8	18220.1		249.998	14389.4	16541.7	9282.6		249.998	7583.21	500	14534
254.998	34386.6	34446.6	18016.1		254.998	14545.5	16898	9321.81		254.998	7750.83	510	14525.3
259.997	34498.8	35156.3	18790.4		259.997	15270.6	17382.5	9769.13		259.997	7824.13	520	15344.3
264.997	35365	35695.6	19100.2		264.997	15657.1	17946.4	9997.69		264.997	8043.17	530	15261.7
269.997	35541.9	36732.4	19942.3		269.997	16054	18418.6	10108.8		269.997	8245.86	540	15662.7
274.997	36203.3	37818.1	20321.9		274.997	16685.2	18855.2	10447.5		274.997	8372.48	550	16129.3
279.997	37078.8	37943.5	20864		279.997	16961.4	19080.3	10589.6		279.997	8538.41	560	16342.1
284.997	37327.2	38575.1	21599.4		284.997	16997.6	19522.7	10993.3		284.997	8714.4	570	16698.2
289.997	39857.1	38713	21448.3		289.997	17454.4	19915.6	11160.8		289.997	8711.13	580	16867.7
294.997	38330.5	39510.8	21769		294.997	18182.7	20374.4	11480.2		294.997	9059.34	590	17236.6
299.997	39052	40486.5	22024.2		299.997	18184.5	21005	11715.6		299.997	9043.75	600	17593.4
304.997	39561	40796.5	22292.2		304.997	18589.6	21153	11883.2		304.997	9206.63	610	18030.7
309.997	40254.3	41473.3	23948.5		309.997	18951.3	21636.9	12173.1		309.997	9273.39	620	18475.4
314.997	40911.1	41819.4	23437.2		314.997	19593.9	21825.7	12420.2		314.997	9450.94	630	18479.4
319.997	40899.7	42820.1	24053.9		319.997	19690	22495.3	12459.8		319.997	9473.03	640	18767.3
324.997	41667	43211.1	24626.9		324.997	20237.7	23042.3	12927.6		324.997	10006.7	650	19161.3
329.997	41927	43651	25126.8		329.997	20467.8	23784.4	13162.3		329.997	10077.1	660	19493.1
334.997	42153.7	43757.1	25659.8		334.997	21129.4	23806.8	13184.4		334.997	10091.4	670	19687.7
339.997	42747.8	44017.2	25937.7		339.997	21231.9	24386.1	13864.4		339.997	10421.9	680	20143.6
344.997	43307.2	44464.5	26842.2		344.997	22338.3	24754.1	13844.1		344.997	10204	690	20169
349.997	43893.4	44643.2	26969.6		349.997	22390.4	25207.7	14172.5		349.997	10534.1	700	20732.9
354.997	44007.4	45733.4	27327.5		354.997	23075.6	25238.5	14190.3		354.997	10409.9	710	20543.4
359.996	44448.9	45634.5	27716.5		359.996	23453.5	25961.6	14561.8		359.996	10651.5	720	21036.1
364.996	45245.9	46313.7	29090.6		364.996	23446.7	25787.1	14650		364.996	10853.5	730	21344.5
369.996	45647.2	46422.2	29459		369.996	24127.1	26632.9	15144.6		369.996	10860.9	740	21840.4
374.996	45356.6	46517.4	28695.7		374.996	24299.1	27271.8	15141.2		374.996	11009.8	750	22277.5
379.996	46212.1	47741.2	29296.5		379.996	24518.5	27673.8	15665.1		379.996	11094.2	760	22498.6
384.996	45687.3	47534.3	29719.6		384.996	25334.1	28197.2	15864.2		384.996	11303.2	770	23022.5
389.996	46923.9	48133.1	30458		389.996	25561.8	28659.7	16111.5		389.996	11380.4	780	23437.9
394.996	47002.4	48633.1	31294.7		394.996	25707.2	29077	16431.7		394.996	11530	790	23190.7
399.996	46981	48177	31623		399.996	26537.6	29417.9	16597.2		399.996	11702.9	800	23705
404.996	47433.8	48903.5	31985.4		404.996	26464.7	29460.8	16906.5		404.996	12024.6	810	23997.5
409.996	47965.1	48784	32526.1		409.996	27132	30009.5	17025.9		409.996	11840.6	820	24485.8
414.996	48410	49117.5	32457.9		414.996	27750.2	30258	17438.4		414.996	12606.1	830	24545.7
419.996	48294.9	48781.6	33127.2		419.996	27447.2	30734.6	17723.4		419.996	12489.7	840	24785.4
424.996	49019.1	49730.7	33032.7		424.996	28305	31164.7	17823.4		424.996	12387.3	850	25836
429.996	49557.9	50134.2	33603		429.996	28872.2	31420.4	18172.9		429.996	12552	860	25392.9
434.996	49641.8	50989.6	33647.5		434.996	28682	31831	18575.3		434.996	12523.1	870	25652.8
439.996	48819.9	49901.1	35006.4		439.996	29542.2	32532.1	18536.9		439.996	12774.6	880	26259.5
444.996	50225.7	50220.5	34664.9		444.996	30071.5	32324.8	18913.4		444.996	13055.2	890	26431.6
449.996	49526.1	50283.2	35900.8		449.996	30382.3	33012.3	19266.3		449.996	13182.3	900	26458.9
454.996	50662.3	50501.5	35937.2		454.996	30481.8	33815.1	19631.6		454.996	13571.7	910	26907.8
459.996	51006.1	50760	36117		459.996	31398.2	33780.3	19682.3		459.996	13599.9	920	27074.3
464.995	51106.3	50465.6	36464.1		464.995	31576.7	34110.1	20043.8		464.995	13534.5	930	27316
469.995	51328.5	50273.3	36997.5		469.995	31495.6	34303.9	20465.6		469.995	13905.8	940	27687.6
474.995	51383.8	51258.2	37452.3		474.995	31890.4	34767.7	20779		474.995	13904.7	950	28457.1
479.995	51699	51800.2	37845.2		479.995	32646.2	34821.1	21033.3		479.995	14046.7	960	28725
484.995	51975.8	51882	38836.2		484.995	32499.7	36127.4	21206.4		484.995	14154.3	970	28863.8
489.995	52082.6	51666.2	38172.5		489.995	32707.4	35511.6	21477.4		489.995	14231.2	980	29063.5
494.995	51328.1	52191.9	38560.5		494.995	33565.5	36559.3	21810.7		494.995	14675.5	990	29272.5
499.995	52206.4	52278	38504.7		499.995	33534.7	36272.8	22353.6		499.995	14741.4	1000	29725.7
504.995	52451.9	51609.2	39890.6		504.995	33825.7	36595.7	22599.3		504.995	14816.3	1010	30236
509.995	52438.5	52438.3	39083.1		509.995	34730.4	37253.4	23278.9		509.995	15029.8	1020	30632
514.995	52657.2	52060.6	40140.9		514.995	35061	37216	23536.3		514.995	14974.5	1030	30824.8
519.995	52612.6	52094.3	40726.3		519.995	34478.8	37405.4	23777.9		519.995	15024.7	1040	30628.9
524.995	52676.2	52216.3	40425.5		524.995	35476.7	38078	23703.7		524.995	15359.6	1050	30857.5
529.995	53323.7	52285.1	40966.8		529.995	35508.6	38136.8	23676		529.995	15046.1	1060	32016
534.995	51290.9	52502.6	41373.3		534.995	36526.5	38483	24212.5		534.995	15960.5	1070	32066.1
539.995	53539	52182.2	41814.3		539.995	36834.6	39804.7	24284.2		539.995	15929.6	1080	32262.3
544.995	53018.2	52604.6	41884.1		544.995	37869.3	39027.9	24418.1		544.995	16055.5	1090	32598.2
549.995	53171.6	52704.9	42016.2		549.995	37072.3	39412.2	24793.2		549.995	16145.3	1100	32540.3
554.995	53888.2	52836.1	42439.7		554.995	37507.5	39640.4	25037.5		554.995	16533	1110	32669
559.995	53591.3	52491.6	43588.8		559.995	37665.5	39868.3	25019.2		559.995	16804.2	1120	33189.4
564.995	53685.1	52928.2	42880.3		564.995	38119.6	40416.3	25690.5		564.995	16479.8	1130	33794.9
569.994	53995.4	52677.6	42993.9		569.994	37840.4	40259.9	26261.7		569.994	17264.7	1140	34197.1
574.994	53912.2	53105.1	43563.5		574.994	38718.3	40409.6	26552.7		574.994	16344.7	1150	34519.7
579.994	54160.9	52656.5	44094.9		579.994	38894.4	40871.1	26827.9		579.994	16637.7	1160	34775.8
584.994	53782.4	52838.5	44664.3		584.994	39493.4	41298	27274.6		584.994	16572.3	1170	34626.9
589.994	54178.2	53330.3	44588.8		589.994	39157.7	41743.6	27392.2		589.994	17055.8	1180	34941.1
594.994	53982	53377.8	44277.9		594.994	39973.7	42351.8	27741.1		594.994	17021.9	1190	35304.5
599.994	54063.8	54017.4	45259.7		599.994	40303.8	42532.2	28245.8		599.994	17196.9	1200	35535.7
604.994	54714.3	54185.1	45417		604.994	40085.4	42644.8	28540.7		604.994	17362.3	1210	35846.6
609.994	54640.2	53361.9	45664		609.994	40925	42698.4	28712.6		609.994	17778.5	1220	36385.6
614.994	54813.9	53911.5	45926.1		614.994	41165.7	43151.9	29231.5		614.994	17795.9	1230	36421.3
619.994	54887.1	53563.9	46559.9		619.994	41097.8	41961	29166.9		619.994	17698.4	1240	36705.4
624.994	54382	53857.1	45807.5		624.994	41975.3	43370.1	29470.3		624.994	18086.5	1250	37371.3
629.994	55092.5	54202.7	45962		629.994	41711.8	44158.3	30269.9		629.994	18575.3	1260	37495.2
634.994	55382.4	54146.8	46053.7		634.994	41837.2	44491.6	29766.7		634.994	18209.4	1270	37537.6
639.994	54213.7	53853	47569.4		639.994	42292.8	44632	30048.9		639.994	18445.5	1280	37888.2
644.994	53824.7	53827.5	46296.5		644.994	42150	44333.2	30427.9		644.994	18773.3	1290	38174.2
649.994	55320.7	54449.4	46494.1		649.994	42249.9	45173.1	30406.4		649.994	18969.4	1300	38341.7
654.994	54083.9	53978.5	47864.1		654.994	43186.9	45654.9	30674.4		654.994	19123.6	1310	38164.2
659.994	54178.2	54018	47447.4		659.994	43594.3	45579.3	30761.4		659.994	19397.9	1320	38178.6
664.994	54209.6	54289.6	47609.4		664.994	42825	45644.6	32629.1		664.994	19249	1330	38681.1
669.993	54305.5	54303.5	47627.9		669.993	44089.4	46233.4	31597.1		669.993	19510.3	1340	39234.9
674.993	54471.4	54276.9	48302.7		674.993	43751.7	46151.3	32079.2		674.993	19677.3	1350	39219
679.993	54106.4	54586	48583.4		679.993	44218.8	46548.4	32439.7		679.993	19487.6	1360	39074
684.993	54115.6	54430.3	48636.8		684.993	44340.6	46696.2	32713.6		684.993	19699.4	1370	39384
689.993	54192.9	54400	48396.5		689.993	44993.2	46572.9	32951.2		689.993	19874.7	1380	40119.8
694.993	54497.5	54133.9	49845.6		694.993	45002.1	46871.6	33194.9		694.993	20176	1390	40100.2
699.993	54012.7	54563.6	49056		699.993	45143	46179.8	33349.1		699.993	20498.5	1400	40786
704.993	54484.5	54348.7	50367.9		704.993	45361.7	47856.2	34450.3		704.993	20092	1410	40795.4
709.993	54287.5	53914.8	48865.8		709.993	44775.4	47491.8	34003.3		709.993	20110.3	1420	41335.4
714.993	54193.2	53997.8	48601.1		714.993	45684.8	47623.9	34792.8		714.993	20308.7	1430	41427
719.993	54573.2	54532.8	49730.5		719.993	45607.7	47762	35288.3		719.993	21018.2	1440	42004.1
724.993	54737.4	54476.4	49978		724.993	46259.2	48131.4	35483.6		724.993	20801.9	1450	41850.2
729.993	54372.1	54417.3	50296.5		729.993	45912.6	48568.8	35659.6		729.993	20714.2	1460	41966
734.993	54818.5	54485.7	50156.8		734.993	46269.1	48298.3	36125.1		734.993	20930.9	1470	42922.2
739.993	54716.6	54710.2	50033.5		739.993	46211.6	48634.1	36677		739.993	21058.5	1480	43109
744.993	54407.5	55504.4	50074.6		744.993	46276.7	49406	35611.6		744.993	21286.5	1490	42805.9
749.993	55377.2	54643.7	50337.1		749.993	46536.8	49032.3	35806.2		749.993	21528.2	1500	41626.5
754.993	54289.4	54650.2	50513.5		754.993	46975.2	49627.8	37006		754.993	21568.6	1510	43454.2
759.993	54990.2	54555.8	50561.7		759.993	46508.2	49220.8	36003.9		759.993	21660.8	1520	43516.1
764.993	54656.5	54713.7	51214.4		764.993	47304.7	49930.9	36338.2		764.993	22099.5	1530	43380.6
769.992	55080.7	54691.6	51632		769.992	47016.8	50326.5	38635.4		769.992	22046.2	1540	42421.1
774.992	54761.6	54613.7	50344.7		774.992	47069.8	50319.5	36913.3		774.992	22301	1550	44258.5
779.992	55285.4	54865.1	50458.4		779.992	47412	50591.8	37794.4		779.992	21630.6	1560	43586.7
784.992	54641.1	55555.6	50382.3		784.992	48443.2	50421.8	38149.8		784.992	22716	1570	44568.9
789.992	54376.5	54524	50641.6		789.992	48257.8	50827.9	38165.6		789.992	22603.3	1580	44761.6
794.992	54803.5	54667.6	50682.6		794.992	47781.9	48723.7	38296.8		794.992	22911	1590	45097.3
799.992	55076.9	54152.9	51811.4		799.992	47974.4	50818.4	38791.3		799.992	22990.5	1600	44668.5
804.992	54785.4	54178.2	51701.9		804.992	48546.8	51063.9	38910.9		804.992	23186.5	1610	44906
809.992	54474.7	53962.9	51624		809.992	48086.3	50253.5	39133.8		809.992	22997.5	1620	44716.9
814.992	55509.8	54097.7	51470.6		814.992	48308.4	51193.1	39548.6		814.992	23593.8	1630	44711.4
819.992	54809.4	54831.1	51653.9		819.992	48512.2	50636.6	40127.3		819.992	23592.8	1640	44949.6
824.992	54753.3	54355.7	52217.3		824.992	48543.5	50607.4	39987.1		824.992	23878	1650	45410.5
829.992	55171.8	53921.6	52468.9		829.992	49337.6	51161.5	40758.3		829.992	23894.3	1660	45595
834.992	55134.7	54499.7	53034.2		834.992	48724.1	51288.1	40827.3		834.992	24210.1	1670	45778.4
839.992	55546.7	54642.8	52318.2		839.992	49168.7	51721.5	41492.5		839.992	24304.6	1680	46013.5
844.992	55300.5	54426.2	51951.7		844.992	48993	51668.3	41426		844.992	24370.1	1690	45848
849.992	54322.7	54555.4	52316.4		849.992	49756.3	51965.1	40739.9		849.992	24664.5	1700	46029.1
854.992	54584.7		53741.7		854.992	49303	51586.3	42270.8		854.992	24490.8	1710	46223.5
859.992	55431.2		51579.7		859.992	50303.8	52121	41207.1		859.992	24708.9	1720	46719.5
864.992	55375.6		54206.2		864.992	49532.6	52893.3	41070.9		864.992	24958.8	1730	46752.6
869.992	55452.2		52186.2		869.992	49708.7	52246.2	41199.1		869.992	24886.6	1740	47087.7
874.992	55329.6		52681.8		874.992	49839.5	52125.9	41768.5		874.992	25562.4	1750	47471.8
879.991	55267.5		52934.1		879.991	51019.5	52332.9	42062.6		879.991	25951.3	1760	47303.9
884.991	54798.8		52728.9		884.991	50607.4	52835.4	42026.6		884.991	25301.1	1770	47407.8
889.991	55181.9		52520.2		889.991	50911.3	52434.4	42370.3		889.991	25585.2	1780	48152.6
894.991	55125.4		52713.3		894.991	50984.1	52831.4	43087.6		894.991	25524.9	1790	48265.3
899.991	54989.6		52744.9		899.991	50569	52575.6	42963.6		899.991	25620.8	1800	48044.5
904.991	55136.4		53041.1		904.991	50839.2	53311.3	43099.2		904.991	25989.8	1810	48471.4
909.991	55239.6		53075.4		909.991	51880.8	52526.4	43399.9		909.991	25575.6	1820	48501.2
914.991	55031.9		52981.1		914.991	51258.6	53609.9	43407.9		914.991	25544	1830	49152.6
919.991	55068.4		52891.7		919.991	51178.1	52608.1	44099.6		919.991	26031.5	1840	49217.2
924.991	54684.6		52643.1		924.991	51460.2	53738	44154.7		924.991	26094.1	1850	49336.4
929.991	54468		53877.1		929.991	51018.7	52963.2	44173.2		929.991	26205.4	1860	49264.4
934.991	54523.2		52129.7		934.991	51066.1	53338.6	44827.1		934.991	26114.7	1870	49412.1
939.991	52989.9		52431.4		939.991	51584.8	53214.2	45210.2		939.991	26822.9	1880	49053.9
944.991	55088.4		52373.1		944.991	52463.6	53149.3	45007		944.991	26668.2	1890	49558.7
949.991	54249.2		52897.5		949.991	51878.1	52842.2	44731.1		949.991	26898.2	1900	49756.9
954.991	54638.8		52935.2		954.991	51487.7	52667.2	44970.4		954.991	27388.2	1910	50146.7
959.991	54839.8		52348		959.991	52089.5	53830.7	45297		959.991	27479.2	1920	49424.4
964.991	55555		53077.6		964.991	51279.8	55555	46414.1		964.991	27405.6	1930	50172.4
969.991	54811.1		52871.9		969.991	52043.5	53221.1	45303.9		969.991	27489.4	1940	50181.6
974.991	55294.6		53300.9		974.991	51447.5	52470.5	45498.9		974.991	27818.8	1950	50541.5
979.99	54345.3		53283		979.99	51338.1	53131.6	45354.8		979.99	27994.4	1960	50407
984.99	53760.9		53029		984.99	52135.4	52736.3	45600.1		984.99	28293.9	1970	50517.6
989.99	53848.2		53876.2		989.99	50710.1	52762	45812.1		989.99	28018.1	1980	50640.8
994.99	54066.5		53079.3		994.99	51979.9	53440.3	45801.9		994.99	28361.2	1990	50947
999.99	53830.2		54328.2		999.99	52340.8	53499.2	45796.1		999.99	28690.2	2000	50872.2
1004.99	53609		54434.2		1004.99	52336	53341.6	46506.6		1004.99	28722.2	2010	50914.7
1009.99	53492.7		54465.8		1009.99	52729	53500.7	46416		1009.99	28524.6	2020	50700.9
1014.99	54039.4		53485.6		1014.99	52737.6	53629.6	47045		1014.99	28939.3	2030	50986.7
1019.99	53729.7		53055.6		1019.99	53001.9	53357.3	47470.8		1019.99	29119.3	2040	51464.5
1024.99	53857.5		53051.8		1024.99	52753.4	53346.5	47461.8		1024.99	29357	2050	51067.1
1029.99	53897.9		52923.4		1029.99	53014.5	53354.8	48134.3		1029.99	29343.3	2060	51333.4
1034.99	54048.2		53844.4		1034.99	52586.8	53453.4	47479.2		1034.99	29359.2	2070	52199
1039.99	53550.4		52977.7		1039.99	53408.2	53714.1	47799.6		1039.99	29595.9	2080	52145.8
1044.99	53930.2		55555		1044.99	52927.4	54011.9	48048.4		1044.99	29503.2	2090	51491.1
1049.99	53619.6		52984.6		1049.99	53113.8	53258.7	48791.6		1049.99	28586.2	2100	51627.7
1054.99	53682.1		53417.3		1054.99	53436.8	54069.6	48572.1		1054.99	30475.5	2110	51896.7
1059.99	53539.8		52862.1		1059.99	53345	54215.1	48563		1059.99	30192.1	2120	52071.4
1064.99	53859.1		53414.4		1064.99	53374.2	53474.7	49029.9		1064.99	30742.5	2130	51513.3
1069.99	53256.3		53450.7		1069.99	53449.8	54547.5	48721.9		1069.99	30345	2140	51935
1074.99	53636.5		53600		1074.99	52856.4	53853.2	48786.9		1074.99	30471.7	2150	51958.4
1079.99	53819		53680.7		1079.99	53893	53802.9	49778.4		1079.99	30200.8	2160	51911.8
1084.99	53287.1		52784.1		1084.99	52987.2	54529.7	48799.3		1084.99	30425	2170	52079.2
1089.99	53680.1		52952.3		1089.99	53393.6	54376.4	50615.8		1089.99	30135.6	2180	51775.8
1094.99	53547.9		52483.7		1094.99	53148.9	54411.1	48748		1094.99	30553.8	2190	52074.1
1099.99	53799.2		52210.5		1099.99	52693.6	54647.5	48847.1		1099.99	30551.5	2200	52070.5
1104.99	53483.8		52761.9		1104.99	52631.1	54042.7	48523.3		1104.99	31475.7	2210	52290.1
1109.99	53575.7		52139.2		1109.99	52262.4	54488.8	49053		1109.99	30889.9	2220	52225.3
1114.99	53254.8		52208.1		1114.99	52712.7	54401.8	49526.3		1114.99	31115.4	2230	52106.1
1119.99	53655.2		52418.5		1119.99	52250.7	54526.8	49074.2		1119.99	30973.6	2240	52447.4
1124.99	53168.5		52631		1124.99	52453	54669.6	49822.3		1124.99	31366.6	2250	52655.4
1129.99	54017.5		52796.6		1129.99	52346.6	54669.6	50355.4		1129.99	31597	2260	52615.9
1134.99	53596.6		52733.3		1134.99	52971.4	54859.8	50226.9		1134.99	31888.5	2270	53317.5
1139.99	53445.5		53072.4		1139.99	52731.2	54543.9	50853		1139.99	31732.3	2280	52749
1144.99	53551.7		53613.4		1144.99	52754	54619.3	51085.3		1144.99	32011.4	2290	53259.4
1149.99	54485.7		52585.7		1149.99	52482.9	54377	51243.8		1149.99	32099.9	2300	53627.1
1154.99	53743		52630.5		1154.99	52845.4	54957.5	51712.5		1154.99	32200.9	2310	53259.5
1159.99	53340.4		52441.5		1159.99	52731.2	54521.6	51584.8		1159.99	32344	2320	53305.7
1164.99			52339.5		1164.99	53097.1	55030.1	51328.1		1164.99	32739.9	2330	53282
1169.99			53414.2		1169.99	53497.8	54660.1	51335.7		1169.99	33266.6	2340	53335
1174.99			53784.8		1174.99	53112.2	55201.1	51296.5		1174.99	32754.2	2350	53720.4
1179.99			52348.6		1179.99	52410.1	55005.3	51217.2		1179.99	32870.3	2360	53077.8
1184.99			51950.1		1184.99	52759.7	54434.3	51121.7		1184.99	33784.8	2370	54448.1
1189.99			51866.3		1189.99	53576.1	54888.3	52281.2		1189.99	33364.2	2380	53931.3
1194.99			52421.3		1194.99	53428.3	54699.2	50875.8		1194.99	34021	2390	53957.1
1199.99			52645.2		1199.99	52982.7	55147.6	51340.6		1199.99	33666.4	2400	53734.9
1204.99			51979.1		1204.99	54248.1	55393.6	51087		1204.99	33721.3	2410	53858.5
1209.99					1209.99	53615.3	55396.8	51112.3		1209.99	33997.3	2420	54094.6
1214.99					1214.99	53873.5	53401	50846.2		1214.99	34495.4	2430	54327.9
1219.99					1219.99	53138.4	55307.2	53638.1		1219.99	34507.5	2440	53465.7
1224.99					1224.99	53557.8	54679	52510.1		1224.99	33989.2	2450	53611.3
1229.99					1229.99	53723.8	55529.1	51565.1		1229.99	34838.4	2460	54099.7
1234.99					1234.99	53739.3	55260.7	51924.2		1234.99	34716.8	2470	54490.5
1239.99					1239.99	52901.5	55076.1	52232.3		1239.99	34783.8	2480	54427.7
1244.99					1244.99	54458.2	54815.2	52544.1		1244.99	34469.3	2490	54149.5
1249.99					1249.99	53146.3	55047.1	52654.3		1249.99	35223.7	2500	53870.7
1254.99					1254.99	53429.1	54929	52863.5		1254.99	34729.1	2510	54562.5
1259.99					1259.99	53819.6	55109.4	53168.9		1259.99	34657.4	2520	54408
1264.99					1264.99	54396.2	54607.9	53024.5		1264.99	35896.7	2530	54113.4
1269.99					1269.99	54286.4	54794.5	53137.1		1269.99	34822.3	2540	54241.4
1274.99					1274.99	54239.5	55240.5	53129.5		1274.99	35580.4	2550	54255.4
1279.99					1279.99	54582	54530.4	52898.3		1279.99	35111.4	2560	54153.8
1284.99					1284.99	54595.1	54990.6	52793.7		1284.99	35094.5	2570	54141.5
1289.99					1289.99	53546.6	54835.3	52790.8		1289.99	35591.8	2580	54579.5
1294.99					1294.99	54062.3	54718	53696.3		1294.99	35541.5	2590	54198.2
1299.99					1299.99	53954.8	53157.8	52389		1299.99	35358.6	2600	54571.2
1304.99					1304.99	53608.5	54750.2	54521.2		1304.99	35915.9	2610	54453.4
1309.99					1309.99	53966.6	54712.3	52539.9		1309.99	35827.2	2620	54579.1
1314.99					1314.99	54530.7	54769	52567.7		1314.99	36031.2	2630	54359.1
1319.99					1319.99	53644.1	55373.2	54976.1		1319.99	36341.5	2640	54434.6
1324.99					1324.99	53491.9	54718	52699.9		1324.99	36201.3	2650	54972.4
1329.99					1329.99	53884.9	55127	52447.1		1329.99	36403.1	2660	54501.6
1334.99					1334.99	54618.7	55310.4	52406.7		1334.99	36499.8	2670	54675.8
1339.99					1339.99	53865.2	54709.5	53291.9		1339.99	37230.5	2680	55555
1344.99					1344.99	54039	54831.4	53062		1344.99	36908.2	2690	54713.9
1349.99					1349.99	53898.8	54360.7	53183.8		1349.99	37070.6	2700	54889
1354.99					1354.99	54066.7	54050.9	53451.8		1354.99	37832.8	2710	54072.1
1359.99					1359.99	54683.5	54111.3	53699.8		1359.99	37248.3	2720	54427.8
1364.99					1364.99	54083.9	53959.8	53860		1364.99	37672	2730	54314.9
1369.99					1369.99	53683.6	54184.1	54072.4		1369.99	37510.7	2740	54180.8
1374.99					1374.99	55555.6	54020.2	53830.9		1374.99	37627.5	2750	54329.4
1379.99					1379.99	54422.6	53888.4	54153.7		1379.99	38146.9	2760	54332.1
1384.99					1384.99	54395.5	53674.8	54152.5		1384.99	37937.8	2770	55045.6
1389.99					1389.99	53974.3	53702.9	54214		1389.99	37954.3	2780	54643
1394.99					1394.99	54936.8	53604.5	54496.2		1394.99	39197.1	2790	54314
1399.99					1399.99	54192.6	53776.8	53611.1		1399.99	38514.8	2800	54188.4
1404.99					1404.99	54959.5	53644.6	53504.6		1404.99	38106.5	2810	54719.9
1409.99					1409.99	53750.8	54032.3	55116.5		1409.99	38511.5	2820	53733.3
1414.99					1414.99	54333	54019.6	55369.4		1414.99	39813	2830	53933.7
1419.99					1419.99	54609	53879	53713.3		1419.99	39351.8	2840	53743.6
1424.99					1424.99	53903.3	53543.8	53319.8		1424.99	39406.1	2850	54102
1429.99					1429.99	54602.8	53526.3	53731.4		1429.99	38911.9	2860	54004.3
1434.99					1434.99	54553.4	53775	53198.7		1434.99	38880.7	2870	54411
1439.99					1439.99	54172.9	53461.4	53397.5		1439.99	40210.6	2880	54335
1444.99					1444.99	54948.2	53668.1	53353.1		1444.99	39599.3	2890	54032.1
1449.99					1449.99	53655.7	53578.8	53427.3		1449.99	40120.9	2900	55261.7
1454.99					1454.99		53630.7	53974.9		1454.99	39026	2910	53791.6
1459.99					1459.99		53671	53929.6		1459.99	39515.3	2920	53896.1
1464.99					1464.99		54829.2	54189.5		1464.99	39731	2930	54219.4
1469.99					1469.99		53736.1	54351.5		1469.99	39616.4	2940	54240.9
1474.99					1474.99		53622.6	54674		1474.99	39442.7	2950	54233.3
1479.99					1479.99		54240.2	54716.5		1479.99	39684.1	2960	53771.3
1484.99					1484.99		53530.6	54224.3		1484.99	39391.6	2970	55133.2
1489.98					1489.98		53476.1	54412.2		1489.98	39910	2980	53854.7
1494.98					1494.98			54700.4		1494.98	39901.2	2990	53991.5
1499.98					1499.98			54827.5		1499.98	42322.1	3000	53964.4
1504.98					1504.98			54932.8		1504.98	40027.8	3010	53943.6
1509.98					1509.98			54586.7		1509.98	40341	3020	53945.6
1514.98					1514.98			54604.4		1514.98	40144	3030	54647.7
1519.98					1519.98			54417.7		1519.98	40837	3040	54713.4
1524.98					1524.98			55306		1524.98	40895.1	3050	54386.8
1529.98					1529.98			54403.5		1529.98	40671	3060	53494.4
1534.98					1534.98			54152.9		1534.98	41058.5	3070	53767.5
1539.98					1539.98			55515.2		1539.98	41460.4	3080	53473.4
1544.98					1544.98			53893.1		1544.98	41614.5	3090	54235.3
1549.98					1549.98			53996.4		1549.98	41580.2	3100	53666.8
1554.98					1554.98			53976.9		1554.98	41866.2	3110	53865.1
1559.98					1559.98			53786.3		1559.98	42034.8	3120	53273.3
1564.98					1564.98			53629.9		1564.98	42047.8
1569.98					1569.98			53625.8		1569.98	40603.8
1574.98					1574.98			53573.4		1574.98	42082
1579.98					1579.98			53559.3		1579.98	42625.4
1584.98					1584.98			53906.6		1584.98	42554.3
1589.98					1589.98			54147.7		1589.98	42511.3
1594.98					1594.98			54550.8		1594.98	42662.6
1599.98					1599.98			54326.2		1599.98	43144.3
1604.98					1604.98			54230.4		1604.98	43177.6
1609.98					1609.98			54594		1609.98	42955.5
1614.98					1614.98			54434.7		1614.98	43429.4
1619.98					1619.98			54483.9		1619.98	43461.9
1624.98					1624.98			55101		1624.98	42926.7
1629.98					1629.98			54958.9		1629.98	43020.9
1634.98					1634.98			55083.4		1634.98	43426.2
1639.98					1639.98			54991.2		1639.98	43904.1
1644.98					1644.98			55077.5		1644.98	43939.5
1649.98					1649.98			55174.5		1649.98	43275.7
1654.98					1654.98			54653.9		1654.98	44384.3
1659.98					1659.98			54143.1		1659.98	43528.7
1664.98					1664.98			54038.4		1664.98	43770.1
1669.98					1669.98			55555		1669.98	44101.5
1674.98					1674.98			54122.7		1674.98	44386.9
1679.98					1679.98			53780.7		1679.98	44028.9
1684.98					1684.98			53722.4		1684.98	43565.3
1689.98					1689.98			53744.5		1689.98	44059.9
1694.98					1694.98			54210.1		1694.98	44095.1
1699.98					1699.98			54157		1699.98	44271.3
1704.98					1704.98			53969.7		1704.98	44996.3
1709.98					1709.98			54311.8		1709.98	45052.8
1714.98					1714.98			54015.7		1714.98	44106
1719.98					1719.98			53860.6		1719.98	44416.1
1724.98					1724.98			54902.3		1724.98	44541.8
1729.98					1729.98			54167.6		1729.98	44618.5
1734.98					1734.98			54576.2		1734.98	44752.6
1739.98					1739.98			54126.9		1739.98	44748.6
1744.98					1744.98			53905.1		1744.98	44289.4
1749.98					1749.98			54330.1		1749.98	44502
1754.98					1754.98			53891.5		1754.98	45056.2
1759.98					1759.98			55028.8		1759.98	44963.6
1764.98					1764.98			55073.2		1764.98	45220.3
1769.98					1769.98			54765.6		1769.98	45168.7
1774.98					1774.98			54999.3		1774.98	45598.3
1779.98					1779.98			54931		1779.98	45461.9
1784.98					1784.98			54992.7		1784.98	46066.9
1789.98					1789.98			54184.5		1789.98	45444
1794.98					1794.98			54177.1		1794.98	45984.7
1799.98					1799.98			55459.1		1799.98	45297.7
1804.98					1804.98			53936.9		1804.98	46327.1
1809.98					1809.98			55372.6		1809.98	46629.4
1814.98					1814.98			53962.5		1814.98	46347.8
1819.98					1819.98			53599.5		1819.98	47202.9
1824.98					1824.98			55216.9		1824.98	47307.4
1829.98					1829.98			53334.6		1829.98	47184
1834.98					1834.98			53756.9		1834.98	46636.3
1839.98					1839.98			53668.9		1839.98	44771.4
1844.98					1844.98			53348.5		1844.98	46632.9
1849.98					1849.98			53267.7		1849.98	46387.7
1854.98					1854.98			53405.8		1854.98	46477.4
1859.98					1859.98			53591.2		1859.98	47674.3
1864.98					1864.98			53790.3		1864.98	46973.1
1869.98					1869.98			53734.3		1869.98	47447.4
1874.98					1874.98			54051.5		1874.98	47173.5
1879.98					1879.98			54163.9		1879.98	47118.7
1884.98					1884.98			54259.6		1884.98	46052.2
1889.98					1889.98			54241.9		1889.98	46818.9
1894.98					1894.98			54266.3		1894.98	47246.3
1899.98					1899.98			54492.7		1899.98	48016.8
1904.98					1904.98			53967.2		1904.98	47094.6
1909.98					1909.98			54401.4		1909.98	46917.1
1914.98					1914.98			54438.2		1914.98	46543.3
1919.98					1919.98			53840.7		1919.98	47351.5
1924.98					1924.98			53452.7		1924.98	50515.1
1929.98					1929.98			53406.9		1929.98	47119.5
1934.98					1934.98			53301.2		1934.98	47143.8
1939.98					1939.98			53200.3		1939.98	47835.1
1944.98					1944.98			54614.9		1944.98	47758.9
1949.98					1949.98			53260		1949.98	48349.4
1954.98					1954.98			53190.6		1954.98	47718.2
1959.98					1959.98			54475		1959.98	47945.9
1964.98					1964.98			53003.9		1964.98	48404.5
1969.98					1969.98			52552.7		1969.98	48084.7
1974.98					1974.98			52558.7		1974.98	48659.3
1979.98					1979.98			52965.2		1979.98	48278.3
1984.98					1984.98			53192.5		1984.98	48931.6
1989.98					1989.98			52981		1989.98	48824.2
1994.98					1994.98			53482.9		1994.98	48705.7
1999.98					1999.98			53157.1		1999.98	49301.3
2004.98					2004.98			53530.7		2004.98	49167.2
2009.98					2009.98			53182.9		2009.98	49292.6
2014.98					2014.98			52951.2		2014.98	49258
2019.98					2019.98			52929.1		2019.98	48945
2024.98					2024.98			53610.3		2024.98	49068.2
2029.98					2029.98			53011.7		2029.98	49458.8
2034.98					2034.98			53846.8		2034.98	47271.8
2039.98					2039.98			53162.1		2039.98	49940.2
2044.98					2044.98			53289.5		2044.98	49673.5
2049.98					2049.98			53451.7		2049.98	49836.8
2054.98					2054.98			53485.3		2054.98	49513.6
2059.98					2059.98			53395.4		2059.98	49597.1
2064.98					2064.98					2064.98	49726
2069.98					2069.98					2069.98	49682.9
2074.98					2074.98					2074.98	49457
2079.98					2079.98					2079.98	49549
2084.98					2084.98					2084.98	49768.4
2089.98					2089.98					2089.98	50299.7
2094.98					2094.98					2094.98	49918.3
2099.98					2099.98					2099.98	49780.8
2104.98					2104.98					2104.98	49737
2109.98					2109.98					2109.98	49978.7
2114.98					2114.98					2114.98	50407.6
2119.98					2119.98					2119.98	49397.2
2124.98					2124.98					2124.98	49947.1
2129.98					2129.98					2129.98	49916
2134.98					2134.98					2134.98	50035.2
2139.98					2139.98					2139.98	49465.8
2144.98					2144.98					2144.98	49603.1
2149.98					2149.98					2149.98	50220.3
2154.98					2154.98					2154.98	50325.4
2159.98					2159.98					2159.98	49588.7
2164.98					2164.98					2164.98	50810.6
2169.98					2169.98					2169.98	50553.7
2174.98					2174.98					2174.98	49953.2
2179.98					2179.98					2179.98	50079.4
2184.98					2184.98					2184.98	49869
2189.98					2189.98					2189.98	50685.8
2194.98					2194.98					2194.98	50883.1
2199.98					2199.98					2199.98	50818.6
2204.98					2204.98					2204.98	51021.3
2209.98					2209.98					2209.98	50830.5
2214.98					2214.98					2214.98	50782.6
2219.98					2219.98					2219.98	51692.4
2224.98					2224.98					2224.98	50699.7
2229.98					2229.98					2229.98	51532
2234.98					2234.98					2234.98	52092.5
2239.98					2239.98					2239.98	51143.4
2244.98					2244.98					2244.98	51119.8
2249.98					2249.98					2249.98	51815.8
2254.98					2254.98					2254.98	51294.2
2259.98					2259.98					2259.98	49033.8
2264.98					2264.98					2264.98	51393.3
2269.98					2269.98					2269.98	51585.1
2274.98					2274.98					2274.98	51745.4
2279.98					2279.98					2279.98	51968
2284.98					2284.98					2284.98	51752.6
2289.98					2289.98					2289.98	51669.7
2294.98					2294.98					2294.98	52161.3
2299.98					2299.98					2299.98	51828.4
2304.98					2304.98					2304.98	51839.3
2309.98					2309.98					2309.98	51502.8
2314.98					2314.98					2314.98	51785.2
2319.98					2319.98					2319.98	51759.1
2324.98					2324.98					2324.98	51920.3
2329.98					2329.98					2329.98	50673
2334.98					2334.98					2334.98	51771.4
2339.98					2339.98					2339.98	51301.4
2344.98					2344.98					2344.98	51380.9
2349.98					2349.98					2349.98	51990.8
2354.98					2354.98					2354.98	52004.1
2359.98					2359.98					2359.98	51529.4
2364.98					2364.98					2364.98	51922
2369.98					2369.98					2369.98	51124.8
2374.98					2374.98					2374.98	51125.4
2379.98					2379.98					2379.98	51853.4
2384.98					2384.98					2384.98	51710.1
2389.98					2389.98					2389.98	51784.9
2394.98					2394.98					2394.98	51784.6
2399.98					2399.98					2399.98	51805.9
2404.98					2404.98					2404.98	52040.9
2409.98					2409.98					2409.98	51705.6
2414.98					2414.98					2414.98	51861.4
2419.98					2419.98					2419.98	52215.8
2424.98					2424.98					2424.98	52078
2429.98					2429.98					2429.98	52980.4
2434.98					2434.98					2434.98	52712.4
2439.98					2439.98					2439.98	52264.1
2444.98					2444.98					2444.98	52957
2449.98					2449.98					2449.98	51982.5
2454.98					2454.98					2454.98	52922.9
2459.98					2459.98					2459.98	53069.2
2464.98					2464.98					2464.98	53254.8
2469.98					2469.98					2469.98	53534.7
2474.98					2474.98					2474.98	53138
2479.98					2479.98					2479.98	54090.5
2484.98					2484.98					2484.98	52857.7
2489.98					2489.98					2489.98	53065.6
2494.98					2494.98					2494.98	52966.7
2499.98					2499.98					2499.98	53069.4
2504.98					2504.98					2504.98	52974.6
2509.98					2509.98					2509.98	53398.9
2514.98					2514.98					2514.98	53621.6
2519.98					2519.98					2519.98	54032.1
2524.97					2524.97					2524.97	53659.9
2529.97					2529.97					2529.97	53403.8
2534.97					2534.97					2534.97	52940.1
2539.97					2539.97					2539.97	52843.6
2544.97					2544.97					2544.97	52787.5
2549.97					2549.97					2549.97	53491.9
2554.97					2554.97					2554.97	54004.3
2559.97					2559.97					2559.97	54089.5
2564.97					2564.97					2564.97	53228.3
2569.97					2569.97					2569.97	54312.2
2574.97					2574.97					2574.97	53048
2579.97					2579.97					2579.97	52675.9
2584.97					2584.97					2584.97	54305.6
2589.97					2589.97					2589.97	52737.3
2594.97					2594.97					2594.97	54279.2
2599.97					2599.97					2599.97	52828
2604.97					2604.97					2604.97	52252.8
2609.97					2609.97					2609.97	53046
2614.97					2614.97					2614.97	52337.5
2619.97					2619.97					2619.97	52446.6
2624.97					2624.97					2624.97	52611.2
2629.97					2629.97					2629.97	52473.1
2634.97					2634.97					2634.97	52870.8
2639.97					2639.97					2639.97	52726.4
2644.97					2644.97					2644.97	52911.9
2649.97					2649.97					2649.97	52985.8
2654.97					2654.97					2654.97	52656.4
2659.97					2659.97					2659.97	53405.8
2664.97					2664.97					2664.97	52974.3
2669.97					2669.97					2669.97	52633.4
2674.97					2674.97					2674.97	51811
2679.97					2679.97					2679.97	53098
2684.97					2684.97					2684.97	53481.8
2689.97					2689.97					2689.97	52961.5
2694.97					2694.97					2694.97	53032.2
2699.97					2699.97					2699.97	53134.9
2704.97					2704.97					2704.97	53726.5
2709.97					2709.97					2709.97	53088.1
2714.97					2714.97					2714.97	53882.5
2719.97					2719.97					2719.97	53311.5
2724.97					2724.97					2724.97	53592.7
2729.97					2729.97					2729.97	53980.1
2734.97					2734.97					2734.97	53806.2
2739.97					2739.97					2739.97	53654.7
2744.97					2744.97					2744.97	53906.9
2749.97					2749.97					2749.97	54147.5
2754.97					2754.97					2754.97	54428.5
2759.97					2759.97					2759.97	53211.9
2764.97					2764.97					2764.97	53286.5
2769.97					2769.97					2769.97	54088.1
2774.97					2774.97					2774.97	54106.3
2779.97					2779.97					2779.97	53829
2784.97					2784.97					2784.97	53820.8
2789.97					2789.97					2789.97	53927.9
2794.97					2794.97					2794.97	54012.4
2799.97					2799.97					2799.97	54279.3
2804.97					2804.97					2804.97	54197
2809.97					2809.97					2809.97	53900
2814.97					2814.97					2814.97	53752.4
2819.97					2819.97					2819.97	53360.5
2824.97					2824.97					2824.97	53328.7
2829.97					2829.97					2829.97	53590.1
2834.97					2834.97					2834.97	53405.6
2839.97					2839.97					2839.97	54342.2
2844.97					2844.97					2844.97	54262.7
2849.97					2849.97					2849.97	54482.9
2854.97					2854.97					2854.97	53765
2859.97					2859.97					2859.97	53095.7
2864.97					2864.97					2864.97	52967.9
2869.97					2869.97					2869.97	53120
2874.97					2874.97					2874.97	53817.6
2879.97					2879.97					2879.97	53167.7
2884.97					2884.97					2884.97	52704
2889.97					2889.97					2889.97	55555
2894.97					2894.97					2894.97	52327.5
2899.97					2899.97					2899.97	52401.5
2904.97					2904.97					2904.97	52269.9
2909.97					2909.97					2909.97	52115.3
2914.97					2914.97					2914.97	51541.8
2919.97					2919.97					2919.97	52599.9
2924.97					2924.97					2924.97	52488.5
2929.97					2929.97					2929.97	53230
2934.97					2934.97					2934.97	53054.3
2939.97					2939.97					2939.97	52644
2944.97					2944.97					2944.97	53246.2
2949.97					2949.97					2949.97	52969.1
2954.97					2954.97					2954.97	52407.5
2959.97					2959.97					2959.97	53088.9
2964.97					2964.97					2964.97	53236.7
2969.97					2969.97					2969.97	53370.7
2974.97					2974.97					2974.97	53178.6
2979.97					2979.97					2979.97	53180.5
2984.97					2984.97					2984.97	53326.5
2989.97					2989.97					2989.97	52318.8
2994.97					2994.97					2994.97	53179.1
2999.97					2999.97					2999.97	53289.8
3004.97					3004.97					3004.97	53197.9
3009.97					3009.97					3009.97	53647.2
3014.97					3014.97					3014.97	53476.4
3019.97					3019.97					3019.97	53031.1
3024.97					3024.97					3024.97	53286.8
3029.97					3029.97					3029.97	53438.2
3034.97					3034.97					3034.97	53247
3039.97					3039.97					3039.97	52721.4
3044.97					3044.97
3049.97					3049.97
