# Supplementary material for: Membrane-mediated dimerization potentiates PIP5K lipid kinase activity
Source: eLife. 2022 Aug 17;11:e73747. doi: 10.7554/eLife.73747 (PMC9470164; doi:10.7554/eLife.73747)
Supplement: Figure 5—source data 3. [file elife-73747-fig5-data3.xlsx]

## Sheet: Figure 5C
Figure 5C
	5 nM reactions			2.5 nM reactions			1 nM reactions
time (sec)	rxn 1	rxn 2		rxn 1	rxn 2		rxn 1	rxn 2	rxn 3		Kinetic trace from reaction 1 (rxn1) is diplayed in figure 5C
0	0	0		0	0		0	0	0
5	115.201	1877.25		889.734	2272.51		233.277	424.028	2816.87
10	2175.97	10477.8		2760.67	5123.73		1049.92	1003.36	3678.46
15	6657.71	18066.2		4937.68	8073.43		2229.8	1674.58	4371.17
20	11622.2	25363.6		7680.5	11083.4		3475.42	2416.04	5015.81
25	16574.1	31963.4		10573.6	14476.6		4712.55	3138.87	5690.9
30	21308.4	37000.9		13503	18455.7		5984.91	4015.67	6635.15
35	25309.1	40752.3		16638.3	21673.9		7249.65	4770.98	7476
40	30966.1	43816.6		19882.2	25742.2		8428.23	5848.6	8364.11
45	32587.5	45775.4		22530.7	29046.7		9862.46	6737.45	9071.01
50	35298.7	47849		25461.6	31861.7		11218.1	7889.17	9744.72
55	37712.7	49104.8		27830.8	34511.2		12708.9	8698.84	10736.8
60	40064.4	50263.5		29808.1	37531.9		14114.8	10146	11568.5
65	41544.6	50751.3		31882.8	39281.1		15518.4	11365.8	12386.2
70	43259.9	50880.3		34112.9	41701		16934.2	12595	13235.1
75	44342.4	50807.4		35716.9	43432.5		18552.5	13979.5	14357
80	45747.3	50599.6		37554.1	44953.1		19791.1	15293.3	15380.4
85.001	46468.5	51859.7		39155.1	46541.7		21365.2	16573.6	16264
90.001	47305.7	51648.7		40242.4	47096.2		22380.5	18257.2	17052.1
95.001	48165.9	51514.4		41929.9	48076		24013	19443.7	18223.6
100.001	48992.7	51904.3		42850.2	49721.7		25468.8	20758.7	19529
105.001	52899.1	51608.5		43687.9	49501.2		26723.7	22372.1	20474.3
110.001	49773.2	52303.1		44753.3	50310.2		27124.8	23761.9	21811
115.001	50152.1	51967		45605.4	50621.1		28632.4	25223.9	22855.2
120.001	50566.2	52451.8		46330.4	49684.1		30510.1	26552.8	23579.5
125.001	50433	52393.9		46468.3	51255.1		31920.3	27745.9	25052.7
130.001	51276.2	51992.4		47397.9	51594.5		32833.2	28801.3	25945.4
135.001	51104.6	53162		48089.9	51666.6		33875.9	29339.4	27292.5
140.001	51090.6	52592.8		48782.5	52362.2		35443.5	31448.5	28603.7
145.001	51547.6	52665.2		48664.5	51762.6		35242.1	32595.9	29722.8
150.001	51930.7	53275.8		49287.1	51758.5		36570.5	33644.7	30746.4
155.001	52183.3	52273		49568.7	51392		37615.2	34931.9	31420.4
160.001	52646.2	52574.2		49726.2	52100.7		38444.4	36361.7	32908.4
165.001	52232.7	52015.9		50022.1	52216.5		39278.4	37116.5	33766.5
170.001	53073.1	53854.1		48588.5	51803		39903.2	38109.6	35091.2
175.001	53266	52728.1		50802.4	52255.6		40936	39093.6	35582.7
180.001	53590.4	53094.8		51167.4	52391.1		41791	39827.8	36898.6
185.001	53443.8	53243.8		51524.9	52781.6		42782.4	40781.2	37334.4
190.001	53517.6	53403.9		51996.9	52866.8		43313.2	41590.9	38385.4
195.001	53163.2	53060.8		51618.2	53493.8		43876.8	42404.6	39907
200.001	54113.6	52908.6		52103.4	52846.5		44507.4	43311.4	41232.9
205.001	53984.8	53499.7		49859.1	53189.8		44666.5	43518.1	41149.8
210.001	54214.5	52988.5		52504.9	53282		45340.6	44172.3	42345.7
215.001	54044.6	53768.1		52732.7	53987.5		45741.1	44862	42942.9
220.001	54591.6	53365.2		52988.1	52837.6		46529	45531.6	43581.2
225.001	54363.9	53327.4		53165.4	52622.3		46552.3	46161.7	44599.6
230.001	54264.8	53288.2		52820.2	53305.3		46864.4	46780.9	44890.2
235.001	54654.8	52873		52721.2	53623.6		47336.6	47079.5	45438.9
240.001	53036.1	53741.2		53438.4	53195.5		47698.7	47390.4	46002.1
245.001	54649.5	54327.7		53489.1	53344.5		47926.3	48155.3	46707.9
250.001	54810.9	53472.4		53458	53734.7		48303.8	48072.1	46493.5
255.002	55054.6	53515.6		53076.5	53763.9		48514.8	48550.6	47241.3
260.002	54579.3	54001		53676.3	53655.3		48923.5	49097.8	47735.1
265.002	55268.6	54032.4		53266.1	53673		48879	48883.8	48426.4
270.002	54675.5	54671.4		53222.3	53202.6		49277.1	49468.2	49128.7
275.002	54532.4	53750.9		53475.5	53670.2		49397.2	48131	48929.6
280.002	55555	53727.7		53337.1	53787		49579.6	50220.3	49671.7
285.002	54511.9	53669.9		53438.9	53994.5		49980.9	50922.2	49529.2
290.002	54810	54002.7		54001.6	53323.7		49985.2	50032.1	50290.2
295.002	55530.7	53481.3		53576.3	53839.2		50419.4	50665.2	50277.2
300.002	55281.1	54679.4		53669.2	53524.1		50559.8	50617	50450.1
305.002	55107.2	54544.3		54829.6	53523.1		50768.8	50895.3	51248.9
310.002	54748.2	54458.8		54485.8	54050.9		50723.7	51141.6	49914.6
315.002	55312.2	54789.7		53883.1	53233.9		51320.3	51308.8	50820.4
320.002	55169.8	54770.3		54549.6	53527.8		51240.1	51617	50936
325.002	55097.3	54564		54073.4	53972		51129.7	52138.6	51357.3
330.002	55181.3	53848.3		54309.3	53864.9		51578.4	51652.3	51242.9
335.002	54936	54103.6		54834	53794.1		51527.1	52411.8	50794.7
340.002	54815.4	53946.8		54498.5	53552.3		51426.7	50138.5	50794.5
345.002	54989.8	55117.4		54592.7	54232.6		51522.5	52572.5	51069.1
350.002	54945	54317.8		53093.8	53368.1		52186.9	51883.1	51108.1
355.002	54894.8	54745.8		54801.8	53921.2		51864.2	52138.8	50294.7
360.002	54778.6	54639.9		54696.7	53615.4		52157.6	52626.5	51709.4
365.002	55024.2	53760.1		54278.7	53875.4		52279.3	52288.7	51630.9
370.002	54802.1	54335.5		55555	53672.2		51970.4	52687.8	51877.2
375.002	55055.5	53883.3		53332.5	53890		52406.2	52951.6	52058.7
380.002	55081.9	54778.2		55532.6	53680.8		52314.2	52561.4	51655.1
385.002	55016.7	53698.7		54919.5	53934.9		52235.6	52463.2	52506.7
390.002	54483	54200.3		54911.9	53330.2		52471.3	52430.2	52536.9
395.002	54890.2	55555.6		54375.5	53729.6		52542.8	52535.8	52645.2
400.002	55124.8	54176.3		54682.2	53698.7		52386.4	52621.5	52745.2
405.002	54686.1	54143.5		54601.7	54287.4		52502.7	52807.1	52702.3
410.002	54280.8	55110.5		54444.3	53853.5		52620.7	52726.5	53088.8
415.002	54338.7	54802.4		53592	53680.4		52593.4	52795	52866.9
420.002	54447	53935.3		54564.5	54073.8		52783.3	53531.6	52059.6
425.003	55180	54784.7		55230.2	55555.6		53011.4	53281	52581
430.003	54684.1	54073.1		54189.7	54184.8		55555	52531.4	52757
435.003	55120.4	54896.5		54015.6	54355.2		52622.5	53523.2	52964.7
440.003	54356.5	55304.4		55289.5	53564.6		52878.5	53114.5	53258.5
445.003	54788.9	54922.8		54434.4	54339.6		52832.4	52883.3	53611.4
450.003	54542.6	54310		54619.3	53702.8		52993	52990.6	53161
455.003	54643.6	54525.8		53623.3	54051.8		52723.5	52497.6	53342.2
460.003	53908.2	54674.7		54056.4	53957.4		53006	53145.2	52719
465.003	54341.9	54774.4		54487.4	54164.2		52982.4	52626.5	53816
470.003	55124.4	54735.2		53889.2	53976.3		53211.8	52803.6	53174.1
475.003	54087.7	54964.9		54288.6	54529.9		53215.4	52842.4	52904.9
480.003	54432	55257		54117.1	53890.3		53240.4	52627.7	52940
485.003	54391.8	54172.4		54245.7	53814.6		53302.1	52810.1	53395.7
490.003	54376.8	55342.9		54730.5	53875.2		53422.6	52932.5	53700.3
495.003	54400.5	55358.3		55190.3	54252.3		53223.7	52104.3	53259.3
500.003	55010.6	54982.9		54525.3	54013.7		52937	52705.6	53335.4
505.003	53772.9	54879		54226.6	53962.7		52830.3	52853.1	53659.1
510.003	54314.1	54623.8		54093.5	53461.2		52664.3	52540	52994.9
515.003	53961.3	55116		53942.4	54705.4		53431.6	52537.5	53557.8
520.003	55025.6	54324.9		54090.9	54704.5		53646.6	53363.8	53994.2
525.003	55062.8	54344		54101	54557.6		53679.4	52776.7	53310.1
530.003	53876.7	54925.8		53984.5	54850.1		53297.5	53916.1	53183.8
535.003	53286.7	54576.7		54119.2	54744.9		53974.8	52686.3	53523
540.003	52593	54702.8		54514.3	54366.1		54526.3	52744	53303.1
545.003	53722.9	54855.6		54378.8	53968.3		53691.7	52708.7	52518.4
550.003	53511.6	54804.4		54226.8	54705.3		53601.7	52726.8	54412.1
555.003	53632.1	55402.3		53889.9	54204.9		53373.1	52820.3	54041
560.003	53639.5	55122.6		54364.1	54439.2		54186.9	52525.6	54721.9
565.003	53417.3	55081.5		54050.1	54571.7		53282	52307	53844
570.003	53266.7	55100.4		54047.6	54278.8		53790.1	52590.2	53914.2
575.003	52207.2	54754.4		54586.5	54152.2		53491.7	52399.2	54205.3
580.003	52854.7	54718.3		54408	54724.8		52720.2	52189	52900.7
585.003	54011.1	55206.2		54472.8	54517.8		53413.1	52351.6	53180.6
590.003	53182.7	54955.2		53981.7	54435		53506.3	52190.8	52991
595.004	52476.2	54548.8		54182.5	54695.3		52749.7	52336.9	53498.7
600.004	52771	55499.1		54130.6	54679.4		53293.8	52018.4	53710.2
605.004	52766.2	54449.8		54202.4	54512.5		53324	52644.8	54472.9
610.004	52784.8	55445.2		53925.1	55417.4		53857	52793.5	54504.5
615.004	52823.3	55405.2		54441	54315		53600.8	52116.9	53731.4
620.004	52323.5	54936		54345.8	53950.8		54109.2	52208.4	54859.5
625.004	52585.7	54694		54360.2	54604		52960.9	51969.7	54241.1
630.004	52410.6			53969.2	54188		53498	52472.4	54225.3
635.004	52066.9			53414.5	54320		53548.4	52438.5	54420.6
640.004	52571			54229.8	54388		53072.2	52405.8	53939.1
645.004	52481.9			54349.4	54786		55093.1	52181.1	54302
650.004	52031.2			54447.3	54018		53581.7	55199.9	54877.5
655.004	52316.8			54134.4	54624		53127.3	51952.7	54708
660.004	51746			54636.2			53314.7	52022.7	54357.2
665.004	52135.5			54863.6			53289.4	52285.6	54299.4
670.004	51877.2			54371.5			55101.6	52503	54234.1
675.004	52046.9			54174.7			53512.6	52026.7	54231.5
680.004	51995.1			54061.7			53451.7	55059.6	54839.2
685.004	52465.9			54440.7			53180.9	52809.9	54660.9
690.004				54320.9			53434.7	55555	55148
695.004				54786.5			52800.4	51933	55196.8
700.004				54640.1			53346	52305.9	54878.9
705.004				54037.8			53464	52320.6	54899.4
710.004				54555.4			53126.3	52447.6	55085.4
715.004				54370.8			53535.9	52633	54073.4
720.004				54407.8			53178	52461.4	54824.2
725.004				54219.8			55250.5	52583.6	55205.4
730.004				54613.9			55060.7	51847.9	54609.1
735.004				54067			53181.7	52687.7	54737.3
740.004				54059.1			53197.9	52271.7	55500.4
745.004				54338.8			54985.9	52093.5	55010.6
750.004				54054.9			53911.9	52170.4	54819.3
755.004				54595.6			53760.6	52531.9	54826.5
760.005				54184.5			53557.5	52750.2	54908.4
765.005				54499.6			52250.8	52766.2	54550.8
