# Supplementary material for: Membrane-mediated dimerization potentiates PIP5K lipid kinase activity
Source: eLife. 2022 Aug 17;11:e73747. doi: 10.7554/eLife.73747 (PMC9470164; doi:10.7554/eLife.73747)
Supplement: Figure 5—source data 4. [file elife-73747-fig5-data4.xlsx]

## Sheet: Figure 5D
Figure 5D
	5KB					5KB (D51R)				5KB (D51R,R254D)
concentration	rxn 1	rxn 2	rxn 3	rxn 4		rxn 1	rxn 2	rxn 3		rxn 1	rxn 2	rxn 3
1 nM	144.1	167.6	130.7	121.9		981.6	948.1			111.8	126	137	sec
2.5 nM	66.5	54.8	85	84.7		595.1	389.5	422		54.8	43.7		sec
5 nM	41.7	37.8	36.7			359.7	207	213		37.5	23.2		sec
	time values above represent the reaction half-times in Figure 5A, 5B, 5C
