# Supplementary material for: Membrane-mediated dimerization potentiates PIP5K lipid kinase activity
Source: eLife. 2022 Aug 17;11:e73747. doi: 10.7554/eLife.73747 (PMC9470164; doi:10.7554/eLife.73747)
Supplement: Figure 5—source data 5. [file elife-73747-fig5-data5.xlsx]

## Sheet: Figure 5F
Figure 5F
solution concentration, nM	average mNG-5KB intensity	average mNG-5KB(D51R) intensity
0	0	0
5	745	220
10	1746	519
25	4497	1380
50	9451	3263
100	15185	5993
250	22628	10225
500	24878	13308
