# Supplementary material for: Membrane-mediated dimerization potentiates PIP5K lipid kinase activity
Source: eLife. 2022 Aug 17;11:e73747. doi: 10.7554/eLife.73747 (PMC9470164; doi:10.7554/eLife.73747)
Supplement: Figure 5—source data 6. [file elife-73747-fig5-data6.xlsx]

## Sheet: Figure 5G
Figure 5G
substrate density (PI4P/µm2)	Reaction Velocity (+mNG-5KB)		substrate density (PI4P/µm2)	Reaction Velocity (+mNG-5KB, D51R)
54998.9	48.2459		55047.7	12.7886
54560.7	59.5855		54638.3	12.1925
53863.2	88.4028		54050.4	12.7455
53074.6	94.5882		53375.2	12.8463
52097.3	92.1613		52626.4	12.2334
51087.8	102.29		51961.3	12.3017
49906.3	106.31		51336.1	8.79771
48624.3	110.219		50775.8	10.2864
47196.1	114.64		50108.2	11.2644
45745.3	106.798		49297.4	14.3253
44203.3	101.444		48362.6	13.3525
42647.9	103.353		47395.8	12.3969
41002.1	96.3538		46442.7	12.0634
39276.3	97.4597		45459.6	12.1662
37457.1	98.0828		44416.8	13.2023
35587.4	88.8428		43431.9	9.11845
33732.6	82.1028		42444.3	8.63287
31914.1	77.1185		41436.7	10.1586
29973.1	78.9793		40357.3	9.19893
28102.5	71.8352		39252.3	8.21431
26200.7	62.9973		38134.9	7.38594
24426.1	61.9833		36945.8	6.691
22616.8	56.8695		35441.1	8.19793
20866.3	53.1671		34117.9	7.51116
19166	49.118		32828	4.98796
17554.8	43.6604		31796.3	5.97938
16062.2	38.3162		30472.2	5.89654
14644.3	36.0025		29316.4	4.28532
13286.7	34.2104		28154.7	3.73348
11982.1	30.5467		27065.4	4.96789
10734.1	28.7478		25802.7	4.35884
9557.33	26.8029		24600	3.44644
8517.89	21.014		23124	4.12645
7534.49	20.2577		21988.3	3.15597
6746.18	16.8068		20797.5	1.63359
5923.07	14.5558		19837.3	3.24148
5200.46	16.8131		18563.7	2.50002
4592.22	9.25917		17399.2	2.42086
4200.56	3.98174		16380.7	2.0303
3989.95	4.48801		15367.7	2.02122
3797.84	3.14706		14600	1.16563
3562	4.4782		13728.6	1.52566
3413.65	3.04378		13065.3	1.40458
3225.37	1.70022		12211	1.15127
3081.66	4.13299		11566.7	1.24826
2879.79	3.27553		10850.7	1.05685
2639.54	4.13023		10149.8	0.949287
2525.6	1.7472		9514.29	0.932194
2404.16	0.16531		8669.01	1.25572
2391.53	1.45233		7938.88	1.10237
2296.29	1.0327		6774.26	1.41399
2220.43	1.69254		6288.94	0.64807
2182.42	0.0334593		5779.35	-0.17317
			5846.46	0.364098
			5789.5	-0.186268
			5528.97	0.429506
			5206.76	0.755291
			4657.28	0.309923
			4339.69	0.389384
			4037.52	0.352385
			3266.37	0.957573
			2772.11	0.650299
			2359.93	-0.206695
			2397.22	0.137938
			2235.99	0.275359
			2012.54	0.161389
			2010.17	-0.0798038
			2319.88	-0.550458
			2341.01	0.12268
			2287.72	0.415377
			1971.99	-0.0332253
			1917.5	0.120092
			1821.97	0.10958
			1746.98	-0.00327708
			1630.79	0.144783
			1369.38	0.376964
			961.266	0.394954
			726.999	0.107741
			92.9803	0.633402
			64.2052	0.110397
			198.391	-0.939511
			657.232	0.0123113
			791.582	0.107128
			748.064	-0.239873
			906.09	-0.0180336
			926.062	0.0255381
			930.339	-0.0382613
			880.396	0.0688779
			584.387	0.419861
			340.436	0.191955
			149.217	-0.0556076
			134.713	0.110533
			15.4831	0.108351
			-50.0592	0.00206704
			103.144	-0.196698
			523.135	-0.4385
			687.811	-0.0102545
			686.796	0.273717
			479.42	-0.0241053
			471.566	-0.00328927
			475.54	0.0313668
			416.257	0.0351878
			406.271	0.0116119
			114.239	0.298505
			-121.016	0.283296
			-373.562	-0.0310533
			-787.342	0.472576
			-765.615	-0.0222273
			-739.69	-0.52134
			175.206	-0.514423
			353.25	-0.185788
			578.309	0.236054
			354.518	-0.0548725
			392.015	0.0172782
			341.846	0.0511795
			281.64	0.047049
			-215.082	0.514669
			-485.464	0.268941
			-638.743	-0.308241
			-378.896	-0.0692397
			-375.455	0.105708
			-474.218	0.0633958
			-487.531	-0.0522333
			-64.614	-0.44577
			141.134	-0.15736
			144.366	0.38834
			-38.6737	-0.0334325
			-124.453	-0.0710598
			19.3064	0.043471
			-21.2285	-0.0717463
			112.596	-0.0617657
			30.5045	0.0874788
			-53.0699	0.144728
