# Supplementary material for: Membrane-mediated dimerization potentiates PIP5K lipid kinase activity
Source: eLife. 2022 Aug 17;11:e73747. doi: 10.7554/eLife.73747 (PMC9470164; doi:10.7554/eLife.73747)
Supplement: Figure 5—source data 7. [file elife-73747-fig5-data7.xlsx]

## Sheet: Figure 5H
Figure 5H
mNG-5KB			mNG-5KB (D51R)
Reaction Coordinte (x)	dx/dt		Reaction Coordinte (x)	dx/dt
0.0101413	0.000608071		0.0167437	0.000755894
0.0107189	0.000619984		0.0174486	0.000769137
0.011328	0.000634404		0.0182117	0.000785111
0.0119533	0.000647893		0.018976	0.000802871
0.0126001	0.000663314		0.0197112	0.000814387
0.0132574	0.000676054		0.0204901	0.000827385
0.0139113	0.000687408		0.0213055	0.000837174
0.0145795	0.000701127		0.022129	0.000845285
0.0152677	0.00071261		0.0230147	0.000856806
0.0159434	0.000720542		0.0238964	0.000863316
0.0166585	0.000729947		0.0248069	0.000869454
0.0173876	0.000738953		0.0257276	0.000870159
0.0181246	0.000748234		0.0266289	0.000876787
0.0188638	0.000756581		0.0275378	0.000881996
0.0196009	0.000761183		0.0284401	0.000889536
0.020358	0.000768495		0.0293737	0.000895377
0.021126	0.00077531		0.0303091	0.000902282
0.021904	0.000785111		0.0311847	0.000904528
0.0227033	0.00079273		0.0321519	0.000914623
0.0234989	0.000798628		0.0330868	0.000920864
0.0243028	0.00080693		0.0340112	0.000929143
0.0251153	0.000811598		0.0349492	0.00093925
0.0259207	0.000815677		0.0359397	0.000950803
0.0267126	0.000816519		0.0368891	0.000956465
0.0275337	0.000816676		0.0378701	0.000964249
0.0283427	0.000822196		0.0388223	0.000970579
0.0291485	0.0008253		0.0397601	0.000975581
0.029943	0.000827732		0.0407233	0.000982584
0.0307829	0.000835179		0.0417221	0.000990027
0.0316372	0.000843801		0.0426965	0.000994286
0.032492	0.000843426		0.0437414	0.00100653
0.0333124	0.000841863		0.044768	0.00101704
0.0341299	0.000844302		0.0457909	0.00102625
0.0349456	0.000849776		0.0468665	0.00103472
0.0357369	0.00084949		0.0478128	0.00103056
0.0365828	0.000849846		0.0487141	0.00102642
0.0374521	0.000854914		0.0495866	0.00101554
0.0383108	0.000852557		0.0503962	0.00100243
0.0391638	0.000853021		0.0514203	0.00101049
0.0400063	0.000855104		0.0524684	0.00101973
0.0408736	0.000858838		0.0535301	0.00103147
0.0417396	0.000860833		0.054616	0.0010424
0.0426182	0.0008592		0.0556978	0.00105581
0.0434926	0.000862041		0.0567837	0.00107019
0.0443591	0.00086337		0.0578137	0.00107833
0.0452346	0.000869425		0.058862	0.00108521
0.0461289	0.000875408		0.0598591	0.00108735
0.0470373	0.000879814		0.0608154	0.00108543
0.0479369	0.000885661		0.0617698	0.00108009
0.0488262	0.000889155		0.0626164	0.00106625
0.0497691	0.000893437		0.0634559	0.00104807
0.0506852	0.000899371		0.0643366	0.0010371
0.0516312	0.000909834		0.0652222	0.00102285
0.0525435	0.000915391		0.0661048	0.00100926
0.053415	0.000913268		0.066994	0.000999022
0.0543409	0.000913916		0.0679524	0.000982203
0.0552394	0.000915006		0.0689846	0.00094926
0.0561383	0.000916275		0.069976	0.000923596
0.0570341	0.000920666		0.0709073	0.000908604
0.0579655	0.000930306		0.0717799	0.000898854
0.0589244	0.000940674		0.0726413	0.0008862
0.0598641	0.000950757		0.0735557	0.000881326
0.0608281	0.000961005		0.074472	0.000870464
0.0618107	0.000971178		0.0754403	0.000872515
0.0628287	0.000979868		0.0763795	0.000872983
0.0638108	0.000985517		0.0774138	0.000872929
0.0648036	0.000995096		0.0783819	0.00087137
0.06595	0.0010224		0.0793809	0.00087263
0.0669919	0.00102999		0.0803703	0.000871511
0.067992	0.00104166		0.0813542	0.000878945
0.0689708	0.00105247		0.0823427	0.000881089
0.0700348	0.00106565		0.0832985	0.000882236
0.0711414	0.00107706		0.0842612	0.0008795
0.0722313	0.00108764		0.0853011	0.000888064
0.0733677	0.00110564		0.0863119	0.000892721
0.074558	0.00111966		0.0873068	0.000897181
0.0757025	0.0011331		0.0882937	0.000901994
0.0767956	0.00114531		0.0893115	0.000910874
0.0779685	0.00115828		0.0903748	0.000913246
0.0791278	0.00116903		0.0914086	0.000929173
0.0802962	0.00117894		0.0924839	0.000941807
0.0814099	0.00118409		0.0935597	0.000955039
0.0825255	0.0011858		0.0945355	0.000961283
0.0836979	0.00119212		0.0955442	0.00097729
0.0848471	0.00119688		0.0965445	0.00098242
0.0859932	0.00119652		0.0975902	0.000997068
0.0871821	0.00120636		0.0986722	0.00101068
0.088406	0.0012217		0.099811	0.0010266
0.0895936	0.00123003		0.100902	0.00104181
0.090812	0.00124091		0.101938	0.00105528
0.0920055	0.00124205		0.102986	0.00106416
0.0932344	0.0012549		0.103973	0.00108186
0.0944353	0.00125934		0.105017	0.00110177
0.0956314	0.00127008		0.106142	0.00112785
0.0968563	0.00127318		0.107214	0.00115289
0.0981905	0.00127584		0.108375	0.00116103
0.0994942	0.00128181		0.109596	0.00116982
0.100801	0.00128178		0.110864	0.00117257
0.102182	0.00128983		0.112167	0.0011688
0.103557	0.00129612		0.113315	0.0011911
0.104893	0.00130393		0.114441	0.00121446
0.106182	0.00130716		0.115536	0.00123847
0.107541	0.00131479		0.116609	0.00126179
0.108932	0.00132777		0.11779	0.00129766
0.11032	0.00134008		0.118941	0.00133175
0.111737	0.00135738		0.12014	0.00135847
0.113187	0.00136817		0.121378	0.00138887
0.114576	0.00137242		0.122651	0.00141225
0.115771	0.00138677		0.12388	0.00142236
0.117137	0.00139002		0.125155	0.00143243
0.118609	0.00140369		0.126554	0.00143412
0.120095	0.00141216		0.128073	0.00144067
0.121525	0.00142396		0.129527	0.00144999
0.12294	0.00143572		0.131033	0.00145983
0.124313	0.00143603		0.132537	0.00146768
0.125734	0.00145542		0.134187	0.00149182
0.127175	0.00147985		0.135813	0.00151144
0.128654	0.0015004		0.137461	0.00152228
0.130182	0.00151655		0.139207	0.00154376
0.131675	0.00153745		0.140954	0.00156768
0.133186	0.00155433		0.142546	0.00157332
0.134685	0.00156752		0.14418	0.00157663
0.136364	0.00159117		0.145791	0.00158835
0.138031	0.00160578		0.147572	0.00160844
0.139715	0.00163208		0.149277	0.00163656
0.141378	0.00164664		0.151025	0.00166185
0.143073	0.00165655		0.152777	0.00169399
0.144679	0.0016664		0.154596	0.00172219
0.146343	0.00169244		0.156367	0.00174885
0.148053	0.00170926		0.158136	0.00176952
0.149802	0.00173528		0.159945	0.00179957
0.151619	0.00175367		0.161769	0.00182356
0.153386	0.00177745		0.163675	0.00184859
0.155255	0.00179934		0.165523	0.00186166
0.157035	0.00180943		0.167331	0.00188706
0.158904	0.00182466		0.169117	0.00190101
0.160723	0.00184404		0.170965	0.00191665
0.162544	0.00185913		0.17284	0.00193176
0.164353	0.00186298		0.174653	0.00194516
0.16617	0.00188396		0.176564	0.00196347
0.167993	0.00189986		0.178371	0.00197966
0.16986	0.00191442		0.180251	0.00200117
0.171803	0.00192461		0.182088	0.00201671
0.173692	0.00193724		0.184093	0.00202898
0.175679	0.00197018		0.185942	0.00203592
0.177575	0.0019849		0.187833	0.00203243
0.179531	0.00201377		0.189758	0.0020435
0.181561	0.00204785		0.191672	0.00205318
0.183623	0.00206668		0.193518	0.00206164
0.185854	0.00208562		0.195447	0.00207036
0.187976	0.00209642		0.197406	0.00207205
0.189959	0.0021081		0.199372	0.002068
0.192109	0.00213703		0.201295	0.00205959
0.194307	0.00216283		0.203376	0.0020713
0.196512	0.00218206		0.205377	0.00208632
0.198876	0.00220059		0.20734	0.00208826
0.201137	0.00222348		0.209354	0.0020845
0.203421	0.0022517		0.211367	0.00208436
0.205679	0.00227215		0.213328	0.00207551
0.208007	0.00229974		0.215404	0.00207235
0.210365	0.00232565		0.217358	0.00206548
0.212759	0.00234906		0.219274	0.00205129
0.215119	0.00235589		0.221325	0.00204518
0.217493	0.00239605		0.223377	0.00203305
0.220026	0.00244299		0.225338	0.00203239
0.22261	0.00250543		0.227523	0.00204613
0.22526	0.0025558		0.229603	0.00204384
0.227905	0.00259879		0.231694	0.00204724
0.230635	0.00263348		0.233749	0.00204086
0.233325	0.00267963		0.235992	0.00203262
0.23602	0.00271649		0.238172	0.00201947
0.238664	0.00275431		0.24024	0.00199663
0.241385	0.00279929		0.242285	0.00198627
0.244174	0.00284529		0.244422	0.00197932
0.246985	0.00290062		0.246537	0.00197387
0.249903	0.00293948		0.248733	0.00197203
0.252821	0.00298841		0.250758	0.00198236
0.255831	0.0030399		0.252768	0.00198306
0.258877	0.00308394		0.254729	0.00197118
0.26198	0.00311415		0.256687	0.00197836
0.265067	0.00315146		0.25878	0.00200062
0.268267	0.00319151		0.261029	0.00200305
0.271446	0.00322398		0.263182	0.00199584
0.274638	0.00325603		0.2653	0.00198979
0.277923	0.00328674		0.267282	0.00199423
0.281133	0.00333184		0.2693	0.00200211
0.284637	0.0033783		0.271287	0.00200721
0.288117	0.00343303		0.273309	0.00202228
0.291615	0.00349565		0.275286	0.0020349
0.295317	0.00356656		0.277304	0.00204459
0.298743	0.00361179		0.279363	0.00205135
0.302432	0.00366153		0.281394	0.00206775
0.306312	0.00370733		0.283562	0.00209218
0.310074	0.00376513		0.285519	0.00210444
0.313936	0.00382976		0.287557	0.00210645
0.317848	0.0038841		0.289604	0.00211707
0.321677	0.00393762		0.291765	0.00212431
0.325595	0.00398216		0.293869	0.00213274
0.329695	0.00404962		0.295951	0.00214029
0.333801	0.00409356		0.298069	0.00214289
0.338043	0.00416101		0.300141	0.00215464
0.342185	0.00420357		0.302416	0.00217316
0.346433	0.00425137		0.304602	0.002194
0.350853	0.0042888		0.306706	0.00219575
0.355241	0.00434237		0.308836	0.00221271
0.35961	0.00440949		0.31119	0.00222991
0.3641	0.00450393		0.313384	0.00222386
0.368587	0.00458218		0.315578	0.0022347
0.37324	0.00466286		0.317791	0.00224405
0.377922	0.00473782		0.319971	0.00224127
0.382706	0.00481897		0.322115	0.00224248
0.387613	0.00489397		0.324394	0.00225203
0.392552	0.00495121		0.326618	0.00225011
0.397467	0.00500727		0.32889	0.00224351
0.402386	0.00505944		0.330886	0.00224479
0.407238	0.00509955		0.332904	0.00224394
0.412367	0.00516406		0.335336	0.00226608
0.417558	0.00523171		0.337737	0.00228327
0.422753	0.00530032		0.340077	0.00229664
0.427981	0.00535582		0.342398	0.00229333
0.433376	0.0054142		0.344604	0.00229489
0.438804	0.0054658		0.347014	0.00229989
0.444174	0.00551204		0.349463	0.00229602
0.449765	0.00556351		0.351674	0.00228911
0.455507	0.00562096		0.354003	0.00228701
0.461087	0.00564962		0.356385	0.00229166
0.466734	0.00567466		0.35861	0.00231642
0.472378	0.00572732		0.360871	0.00231812
0.477941	0.00575774		0.363084	0.00232131
0.483698	0.00581151		0.365502	0.00233061
0.489395	0.00587958		0.367808	0.00234477
0.495673	0.00594941		0.370195	0.00235536
0.50193	0.00603964		0.372806	0.00236619
0.508325	0.00615602		0.375149	0.00235944
0.514676	0.00624241		0.377426	0.00235794
0.521202	0.00635731		0.379782	0.00236296
0.527749	0.00645313		0.382127	0.00237791
0.534338	0.00652301		0.384553	0.00239517
0.540971	0.00658381		0.386917	0.00239405
0.547518	0.00666323		0.389383	0.00238418
0.554372	0.00674642		0.391602	0.00236746
0.560781	0.00679012		0.393791	0.00237569
0.567271	0.00679009		0.396013	0.00238255
0.574018	0.0068312		0.398462	0.00239212
0.580656	0.00685425		0.400981	0.00240533
0.587573	0.00691278		0.403675	0.00243095
0.59446	0.00695958		0.406131	0.00243836
0.601141	0.00700443		0.40861	0.00244068
0.608142	0.00706289		0.411018	0.00244803
0.615082	0.00712164		0.413565	0.0024606
0.622039	0.00716544		0.41606	0.0024674
0.629051	0.00722223		0.418543	0.00247284
0.636165	0.00728986		0.420957	0.00247695
0.643302	0.00733221		0.423341	0.00249871
0.650559	0.00737116		0.425885	0.00250205
0.65786	0.00739637		0.428399	0.00249826
0.665273	0.00739854		0.4309	0.00250132
0.672506	0.00742242		0.433238	0.00249506
0.679607	0.00742509		0.435653	0.00249133
0.686811	0.00743026		0.438155	0.00249172
0.693925	0.00740027		0.440513	0.00247563
0.700971	0.00737477		0.442943	0.00247021
0.708125	0.00735117		0.445121	0.00246641
0.715492	0.00733173		0.447386	0.00246471
0.722494	0.00728404		0.449856	0.00245529
0.729412	0.00724296		0.452471	0.00247661
0.736669	0.00718901		0.454757	0.00248699
0.744048	0.00714664		0.457408	0.00249382
0.751251	0.00709427		0.459885	0.00249908
0.758583	0.00701452		0.462536	0.00252083
0.765733	0.0069487		0.465219	0.00252881
0.772904	0.00688124		0.468063	0.0025511
0.779667	0.00683381		0.470474	0.00255113
0.786328	0.00678562		0.472997	0.00254442
0.792737	0.00674551		0.475473	0.00253258
0.799181	0.00667346		0.478071	0.002512
0.805229	0.00659908		0.480502	0.00247335
0.811267	0.00651088		0.482576	0.0024633
0.817585	0.00644639		0.484722	0.0024533
0.823861	0.00637559		0.48731	0.00247698
0.829781	0.00626211		0.490033	0.00249438
0.83555	0.00618139		0.492841	0.00251202
0.841502	0.00602842		0.49542	0.00252942
0.847226	0.00581434		0.498087	0.00254973
0.852614	0.00563751		0.500743	0.00254162
0.858007	0.00543667		0.503327	0.00254161
0.863368	0.00531759		0.505883	0.0025501
0.868558	0.00516888		0.508444	0.00256286
0.873905	0.00502199		0.510927	0.00254772
0.878696	0.00486678		0.513437	0.002531
0.88334	0.00469728		0.515832	0.00252891
0.887822	0.00450892		0.518473	0.00254429
0.892174	0.0043407		0.52098	0.00255019
0.896413	0.00420154		0.523271	0.00255743
0.900592	0.0040525		0.525826	0.00254683
0.904965	0.00396695		0.528438	0.00253976
0.909266	0.00388452		0.531002	0.00254137
0.91327	0.00377493		0.53361	0.00255545
0.916825	0.00362026		0.536065	0.00256426
0.920468	0.00346331		0.538612	0.0025572
0.923905	0.00331964		0.541204	0.00255548
0.927263	0.00314302		0.543994	0.00254084
0.930683	0.00299616		0.54655	0.00252377
0.933869	0.00286009		0.549268	0.00252318
0.93699	0.00277912		0.551614	0.0025102
0.940107	0.00264484		0.554062	0.0025182
0.942982	0.00249777		0.556491	0.00255447
0.945568	0.00237637		0.559063	0.00256337
0.947871	0.00227767		0.561513	0.00255745
0.949907	0.00214083		0.564095	0.00256222
0.952027	0.00204472		0.566547	0.00257306
0.954149	0.00197282		0.569078	0.00258074
0.955979	0.00189657		0.571743	0.00259878
0.957889	0.00182879		0.574299	0.00259742
0.959659	0.00175957		0.576764	0.00260149
0.961339	0.00168281		0.57933	0.00261269
0.962892	0.00159481		0.581957	0.00261949
0.964317	0.0014618		0.58431	0.0026051
0.965345	0.00128991		0.587095	0.00260718
0.966234	0.00119952		0.58974	0.00260464
0.967362	0.00116951		0.592269	0.00260287
0.968755	0.00111797		0.595075	0.002597
0.969963	0.00108239		0.597812	0.00260086
0.970816	0.000984173		0.600657	0.00259062
0.972207	0.000903598		0.603298	0.0025693
0.973463	0.000821714		0.605883	0.00255408
0.974751	0.000750582		0.608285	0.00256609
0.975837	0.000756877		0.610907	0.00255611
0.977159	0.000772209		0.613626	0.00258747
0.978183	0.000798096		0.616449	0.00260971
0.979403	0.000790861		0.618913	0.00262995
0.980553	0.000762802		0.621614	0.00266328
0.981685	0.000714214		0.623885	0.00268513
0.982387	0.000628574		0.626527	0.00267934
0.982891	0.000552882		0.629056	0.00266619
0.983562	0.000508884		0.631539	0.00263894
0.984007	0.000550289		0.634217	0.00263386
0.984286	0.000588277		0.637025	0.00260631
0.984817	0.000619174		0.639863	0.00257337
0.985413	0.00057198		0.642645	0.00253982
0.985825	0.000530257		0.645337	0.00257341
0.986742	0.000566472		0.647604	0.00257279
0.987743	0.000587642		0.649898	0.00258494
0.988428	0.000619589		0.652153	0.00257178
0.988765	0.000597109		0.654412	0.00257176
0.989163	0.000649104		0.656746	0.00255087
0.989549	0.00066484		0.659063	0.00253032
0.990098	0.000674272		0.661394	0.00251755
			0.663774	0.00251507
			0.666255	0.00248734
			0.668722	0.00245933
			0.671027	0.00241883
			0.67313	0.00240125
			0.675222	0.00236135
			0.677621	0.00233239
			0.680052	0.00231455
			0.682616	0.00231934
			0.684588	0.00227078
			0.686973	0.00228108
			0.689398	0.00227537
			0.691589	0.00224038
			0.694206	0.00225761
			0.696673	0.00226716
			0.699075	0.00224561
			0.701151	0.00222581
			0.703628	0.00219718
			0.705686	0.00215875
			0.707601	0.00213406
			0.709855	0.00213082
			0.712073	0.00209824
			0.7144	0.0021006
			0.716617	0.00208647
			0.718737	0.00206831
			0.720548	0.00204529
			0.722745	0.00203206
			0.724985	0.00202059
			0.727034	0.00200859
			0.72903	0.00199473
			0.731263	0.0019574
			0.733476	0.001978
			0.735787	0.00199141
			0.737902	0.00197613
			0.739932	0.00197753
			0.74174	0.00196272
			0.743547	0.00194768
			0.745547	0.00192304
			0.747634	0.00190932
			0.74958	0.00189271
			0.751634	0.00188781
			0.753502	0.0019179
			0.755278	0.00194321
			0.757276	0.0019553
			0.758882	0.00196787
			0.760476	0.00192823
			0.762109	0.00190407
			0.763976	0.00188712
			0.766102	0.00187864
			0.767658	0.00185791
			0.769095	0.00181978
			0.771193	0.0018476
			0.773171	0.00186004
			0.774439	0.00186449
			0.77624	0.00184836
			0.778012	0.0018465
			0.779902	0.0018284
			0.781648	0.00181117
			0.783482	0.00179071
			0.785131	0.00175267
			0.787448	0.0017905
			0.789263	0.00179509
			0.790879	0.00176702
			0.79256	0.0017464
			0.794471	0.00172193
			0.796092	0.00167333
			0.798277	0.00165733
			0.800217	0.00165913
			0.802155	0.00167645
			0.803437	0.00166783
			0.805435	0.00162007
			0.807101	0.00164027
			0.808553	0.00163003
			0.810389	0.00160752
			0.811832	0.00164277
			0.813314	0.00166299
			0.815035	0.00167199
			0.816885	0.00166474
			0.818625	0.00167889
			0.820782	0.00168406
			0.82291	0.00168546
			0.824808	0.00171928
			0.826708	0.00172165
			0.828121	0.00172358
			0.8299	0.00173654
			0.831773	0.00174624
			0.833498	0.00170658
			0.835109	0.0017046
			0.836355	0.0016752
			0.838002	0.00166834
			0.839262	0.00161798
			0.840976	0.00161428
			0.842307	0.00163098
			0.8434	0.00163029
			0.844882	0.00162279
			0.845866	0.00157733
			0.84745	0.00155486
			0.848805	0.00151071
			0.850501	0.00151054
			0.851868	0.00149921
			0.853332	0.00148277
			0.854437	0.00145548
			0.855574	0.00145076
			0.856909	0.00145363
			0.858113	0.00145418
			0.85949	0.00143534
			0.860909	0.00136791
			0.862447	0.00133191
			0.863893	0.00131795
			0.865091	0.00131554
			0.866409	0.00125875
			0.867808	0.00118112
			0.868725	0.00118906
			0.869861	0.0011946
			0.871379	0.00116084
			0.872781	0.00114777
			0.874078	0.00113721
			0.875255	0.00111214
			0.876554	0.00108766
			0.877888	0.00107351
			0.879317	0.00103416
			0.879844	0.00105075
			0.88084	0.00103524
			0.882133	0.000998494
			0.883316	0.000966021
			0.884237	0.00092917
			0.885381	0.000863753
			0.886193	0.000856774
			0.887091	0.00085592
			0.887851	0.000860363
			0.888958	0.000810676
			0.89008	0.000795375
			0.890881	0.000786643
			0.891887	0.000748651
			0.892943	0.000743202
			0.894316	0.000789267
			0.895059	0.000763414
			0.895754	0.000748176
			0.896696	0.000756685
			0.897621	0.000776885
			0.898171	0.000796189
			0.898798	0.000821438
			0.899022	0.000821847
			0.899784	0.000848649
			0.900875	0.0008617
			0.901398	0.000868512
			0.901971	0.000890327
			0.903151	0.000910942
			0.904104	0.000937585
			0.905222	0.000918292
			0.906126	0.000941591
			0.907751	0.000954738
			0.908446	0.000968725
			0.909666	0.00101891
			0.910736	0.00101381
			0.911349	0.000996628
			0.912746	0.000970328
			0.913717	0.000984555
			0.9148	0.000966914
			0.915331	0.000974762
			0.916117	0.000967114
			0.917029	0.000978097
			0.917859	0.000936154
			0.918604	0.000912715
			0.919333	0.000916193
			0.920302	0.000929566
			0.921059	0.00092109
			0.921921	0.000880435
			0.923003	0.000906179
			0.923764	0.000915082
			0.924727	0.000932432
			0.925778	0.000916815
			0.926664	0.00087333
			0.927464	0.000860477
			0.927935	0.000835771
			0.928567	0.000827624
			0.929167	0.000828371
			0.929687	0.000815838
			0.930397	0.000797912
			0.931241	0.000807112
			0.931672	0.00079165
			0.932299	0.000782365
			0.932993	0.000747824
			0.933811	0.000739714
			0.934318	0.000710486
			0.934976	0.00069158
			0.935952	0.000674705
			0.936759	0.000634853
			0.93743	0.000608364
			0.937979	0.000585181
			0.938876	0.000588244
			0.939567	0.000551611
			0.939972	0.000524348
			0.940538	0.000489607
			0.940846	0.000421761
			0.941034	0.000382259
			0.940938	0.000401155
			0.941454	0.000349156
			0.941691	0.00027662
			0.94231	0.000291129
			0.94258	0.000282802
			0.943266	0.000278476
			0.943663	0.000259429
			0.944788	0.000246303
			0.94544	0.000264823
			0.945991	0.000292937
			0.946545	0.000260231
			0.94719	0.000256079
			0.947823	0.000310062
			0.948718	0.000374595
			0.94941	0.000390035
			0.949905	0.000409128
			0.95002	0.000454667
			0.950388	0.00043749
			0.950568	0.000491717
			0.950908	0.000494532
			0.951703	0.000486101
			0.952029	0.000500817
			0.952034	0.000485998
			0.952358	0.000484343
			0.952855	0.000472182
			0.953501	0.000484644
			0.95391	0.000505865
			0.954454	0.0004806
			0.955037	0.000470058
			0.955439	0.000467706
			0.956029	0.000518602
			0.956388	0.000505346
			0.95715	0.000510707
			0.957178	0.000533743
			0.957563	0.000545716
			0.957706	0.000564201
			0.95792	0.000567965
			0.958301	0.000546363
			0.958593	0.000539631
			0.959438	0.000543387
			0.9597	0.000522179
			0.959902	0.000502064
			0.960298	0.000480647
			0.960851	0.000488522
			0.960927	0.000491193
			0.961391	0.000468034
			0.961729	0.000458263
			0.962208	0.000444529
			0.962296	0.000432558
			0.963007	0.000430914
			0.963591	0.000441764
			0.963832	0.000453516
			0.963915	0.000412413
			0.96413	0.000386296
			0.964349	0.000353124
			0.964317	0.000357656
			0.964508	0.000326582
			0.964769	0.00028455
			0.965445	0.000291962
			0.96646	0.000272721
			0.967196	0.000240665
			0.967778	0.000221827
			0.968296	0.000185035
			0.969117	0.000128957
			0.969302	0.000134888
			0.96973	0.00010792
			0.969766	8.81062e-05
			0.970271	7.2189e-05
			0.970386	9.68048e-05
			0.970455	0.000104625
			0.970623	0.000123373
			0.97097	0.000100226
			0.971119	9.61954e-05
			0.970967	0.000121544
			0.970859	0.000190482
			0.970769	0.000194976
			0.970937	0.000210935
			0.971166	0.000222273
			0.971387	0.000195082
			0.971444	0.000205019
			0.97165	0.000194498
			0.971576	0.000191556
			0.972098	0.000225199
			0.972655	0.000200102
			0.972959	0.000193762
			0.973082	0.000176694
			0.973014	0.000181906
			0.973264	0.000205394
			0.973435	0.000188589
			0.973609	0.00019192
			0.973661	0.00017484
			0.97367	0.000226858
			0.97405	0.000229408
			0.973933	0.000242611
			0.974216	0.000241742
			0.97452	0.000266686
			0.974877	0.000279366
			0.975252	0.000285398
			0.975605	0.000280199
			0.975933	0.000278543
			0.97602	0.000319199
			0.976473	0.000314563
			0.976904	0.000302296
			0.977045	0.000279223
			0.977133	0.000296887
			0.977296	0.000270409
			0.977337	0.000244898
			0.977631	0.000245896
			0.977813	0.000246372
			0.978383	0.000248084
			0.978338	0.000261207
			0.978419	0.00028887
			0.978508	0.000285525
			0.978997	0.000252713
			0.979756	0.000272786
			0.98012	0.000246425
			0.980266	0.000210955
			0.980288	0.000149657
			0.980876	0.000139674
			0.981184	0.000192654
			0.981169	0.000222744
			0.981315	0.000230964
			0.981089	0.000202831
			0.981553	0.000219783
			0.981778	0.000224859
			0.982043	0.00023409
			0.982446	0.000247848
			0.983349	0.000277958
			0.983147	0.000249246
			0.983107	0.000239874
			0.983194	0.000221973
			0.983255	0.000222367
			0.983502	0.000217049
			0.983754	0.00021195
			0.983974	0.000202645
			0.98402	0.000223192
			0.984329	0.000206098
			0.984415	0.000203549
			0.984471	0.000199682
			0.984764	0.000179995
			0.985034	0.000178543
			0.985114	0.000152667
			0.985312	0.000118004
			0.985233	0.000151835
			0.985513	0.00016724
			0.98564	0.00016213
			0.985832	0.000135059
			0.985949	0.000103617
			0.986113	0.000126293
			0.986227	9.60521e-05
			0.986268	7.95626e-05
			0.986652	6.40137e-05
			0.986676	7.72962e-05
			0.987017	0.000108948
			0.98749	0.000114369
			0.987727	0.000120982
			0.987944	0.000153834
			0.988266	0.000190055
			0.988399	0.000203295
			0.988255	0.000176999
			0.988266	0.000168324
			0.988648	0.000214867
			0.989217	0.000269847
			0.989359	0.00027344
			0.989711	0.000258273
			0.990004	0.00027217
			0.990401	0.000258968
			0.991125	0.000265357
			0.991274	0.000265713
			0.991574	0.000269351
			0.991536	0.000280016
			0.991826	0.000274284
			0.9919	0.000273754
			0.991891	0.000234912
			0.992206	0.000238357
			0.992024	0.000274045
			0.992268	0.000268096
			0.992796	0.000259181
			0.993367	0.000214836
			0.993546	0.000238804
			0.993368	0.000264468
			0.993483	0.000265029
			0.994117	0.000309445
			0.994817	0.000285154
			0.994986	0.000320523
			0.995403	0.00034521
			0.995354	0.000332201
			0.995041	0.000313022
			0.994854	0.000374631
			0.995127	0.000315103
			0.995619	0.000310709
			0.995888	0.00028715
			0.996137	0.000276781
			0.996336	0.000273858
			0.996484	0.00026695
			0.996926	0.000281293
			0.997104	0.000281936
			0.997425	0.000284492
			0.997832	0.000287824
			0.998279	0.000289495
			0.998642	0.000289664
			0.998815	0.000287111
			0.999171	0.000259296
			0.999371	0.000218409
			0.999798	0.00024031
			1.0003	0.000285233
			1.00049	0.000263708
			1.00081	0.000238653
			1.00117	0.000205984
			1.00108	0.000186463
			1.00102	0.000113896
			1.00105	5.67259e-05
			1.00116	4.22672e-05
			1.00127	2.22846e-05
			1.00101	1.53735e-05
			1.00092	1.49638e-05
			1.00079	-1.11048e-05
			1.00072	-5.5208e-06
			1.0006	1.01605e-05
			1.00076	1.29422e-05
			1.00123	-2.29737e-05
			1.00129	-6.60426e-05
			1.00107	-4.4731e-05
			1.00048	-3.04444e-05
			1.00068	-2.89778e-05
			1.00095	-1.96511e-05
			1.00081	-2.662e-05
			1.00096	-2.07292e-05
			1.00068	-2.55501e-06
			1.00057	-2.85618e-05
			1.00061	-2.08764e-05
			1.00098	-8.1066e-06
			1.00114	5.20993e-07
			1.00119	-1.7907e-05
			1.00122	-8.41752e-05
			1.00104	-9.69268e-05
			1.00106	-0.000105982
			1.00129	-9.49903e-05
			1.00045	-0.00016155
			1.00066	-0.000152522
			1.00044	-0.000156023
			1.00069	-0.000146345
			1.00083	-0.00014373
			1.00001	-0.000138831
			0.99973	-0.000139484
			0.999422	-0.000132911
			0.999095	-0.000112462
			0.99928	-0.000124373
			0.999814	-0.000135941
			0.999812	-0.000108674
			1.00021	-0.000118192
			0.999801	-0.000129444
			0.99986	-0.000133849
			0.999661	-0.000151444
			0.999426	-0.000168598
			0.999119	-0.000200379
			0.998277	-0.00023182
			0.998263	-0.000219064
			0.997939	-0.000219546
			0.997779	-0.000192644
			0.997787	-0.000145284
			0.99768	-0.00011763
			0.997504	-0.000116835
			0.997597	-9.58375e-05
			0.997991	-7.35048e-05
			0.997833	-1.97217e-05
			0.997044	5.29502e-06
			0.996925	1.97967e-06
			0.99692	1.95728e-05
			0.996969	4.08672e-05
			0.997119	3.95387e-05
			0.99787	4.68359e-05
			0.998236	3.82112e-05
			0.998215	4.15025e-05
			0.998307	5.14723e-05
			0.998321	2.90115e-05
			0.998455	4.19872e-05
			0.998745	3.84877e-05
			0.998943	6.2708e-05
			0.999184	9.55625e-05
			0.999171	0.000118155
			0.99891	0.000108342
			0.999223	0.000109703
			0.9992	0.000113323
			0.999298	8.37377e-05
			0.99903	8.35998e-05
			0.998779	0.000100684
			0.998818	9.02383e-05
			0.998845	0.000119764
			0.998897	0.000122343
			0.999105	0.000111452
			0.999083	0.000125902
			0.998859	0.000158253
			0.998563	0.000161297
			0.998713	0.000170609
			0.999044	0.00014793
