# Supplementary material for: Membrane-mediated dimerization potentiates PIP5K lipid kinase activity
Source: eLife. 2022 Aug 17;11:e73747. doi: 10.7554/eLife.73747 (PMC9470164; doi:10.7554/eLife.73747)
Supplement: Figure 6—source data 1. [file elife-73747-fig6-data1.xlsx]

## Sheet: Figure 6D
Figure 6D
	Trajectories 1-11 of mNG-PIP5KB fluorescence intensity in PIP2 compositional pattern															Trajectories 1-14 of mNG-PIP5KB(D51R) fluorescence intensity in PIP2 compositional pattern
time (sec)	1	2	3	4	5	6	7	8	9	10	11	mean	SD		time (sec)	1	2	3	4	5	6	7	8	9	10	11	12	13	14	mean	SD
0	0	0	0	0	0	0	0	0	0	0	0	0	0		0	0	0	0	0	0	0	0	0	0	0	0	0	0	0	0	0
10	-8.275	-8.278	-6.364	3.038	-5.744	1.292	0.804	-5.212	-7.003	-5.51	-5.25	-4.22745	3.9948		10	4.31	3.472	3.548	0.832	0.763	4.031	5.959	-0.231	2.651	6.012	2.744	1.965	6.409	-0.168	3.02121	2.22198
20	53.715	50.826	51.703	52.089	37.756	57.994	42.259	33.879	43.301	56.186	40.298	47.2733	8.06761		20	-2.513	-2.427	2.427	-3.848	-1.633	-3.576	-3.649	-4.253	-2.488	-6.016	-1.053	-1.396	-4.563	-2.728	-2.694	1.99724
30	166.26	164.706	184.079	189.798	165.038	218.849	128.899	164.835	194.345	168.484	190.81	176.009	23.216		30	193.895	246.649	237.437	227.892	209.187	266.247	276.734	201.93	212.012	238.18	263.728	230.902	215.519	214.313	231.045	25.3118
40	234.105	242.06	252.257	269.611	220.05	261.77	172.531	242.993	296.604	253.867	260.624	246.043	31.4944		40	1727.45	2010.86	1953.64	2121.26	2106.79	2105.66	2238.3	2126.63	1972.87	2252.06	2128.43	2300.12	2370.77	2034.13	2103.5	163.177
50	299.937	320.095	332.016	333.994	268.981	335.608	224.753	276.376	337.377	321.408	318.693	306.294	35.7823		50	1702.92	2023.32	1985.42	2150.37	2132.31	2136.36	2169.68	2116.09	1993.57	2256.89	2103.16	2376.63	2387.16	1969.53	2107.39	174.95
60	343.219	396.187	389.912	386.393	332.303	384.956	269.376	329.072	402.677	360.202	375.595	360.899	39.7458		60	1580.75	1831.96	1843.83	1924.38	1875.46	1996.09	2013.53	1966.06	1818.38	2151.72	1754.55	2074.6	1998.84	1780.49	1900.76	147.569
70.001	413.728	421.782	431.772	460.94	376.864	461.535	295.522	381.92	443.108	422.854	425.31	412.303	47.2298		70	1880.72	2036.11	2024.68	2254.74	2207.68	2524.38	2355.9	2331.81	2101.11	2383.84	1814.44	2451.34	1950.3	1998.65	2165.41	223.785
80.001	509.88	515.32	479.674	537.567	462.262	540.146	356.126	471.294	535.367	477.677	452.807	485.284	53.2075		80	3219.94	3507.74	3445.61	3869.84	3781.32	3470.84	3910.68	4043.12	3668.33	4241.31	3449	3721.6	2805.5	2998.04	3580.92	395.559
90.001	587.45	537.38	511.801	593.779	541.142	597.883	454.842	547.057	614.348	553.658	530.418	551.796	45.6886		90	3495.42	4124.76	4253.45	4413.56	4872.7	4110.23	4863.44	4786.37	4503.26	4707.62	4526.88	4501.61	3904.11	3746.58	4343.57	424.912
100.001	644.861	616.94	561.946	706.31	625.538	676.27	496.418	639.487	684.079	647.756	607.712	627.938	58.8479		100	3795.39	4228.35	4367.76	4607.17	5049.54	4405.81	4948.92	5075.16	4605.21	4785.9	4530.48	4860.14	4810.33	4026.03	4578.3	382.401
110.001	745.393	662.864	624.696	842.326	694.199	786.01	553.342	756.512	834.028	764.914	730.994	726.843	87.5855		110.001	3853.17	4048.41	4402.38	4524.7	5013.28	4747.98	4856.17	5175.36	4640.76	4521.57	4566.47	5154.32	5259.22	4523.11	4663.35	411.058
120.001	837.776	752.39	687.5	950.63	812.259	881.371	622.718	859.205	932.804	888.303	796.668	820.148	100.859		120.001	3911.01	3800.93	4311.71	4632.94	4980.95	4874.18	5010.45	5247.16	4731.32	4701.44	4568.01	5386.5	5585.11	4493.62	4731.1	510.904
130.001	986.583	838.219	757.741	1078.27	881.262	1026.21	699.804	925.06	1075.17	1008.37	908.677	925.942	124.667		130.001	3822	3577.7	4382.37	4519.07	5010.31	5167.32	5070.16	5143.68	4635.95	4422.61	4535.16	5354.8	5561.05	4638.76	4702.92	561.224
140.001	1062.27	962.364	817.181	1157.4	984.766	1149.95	766.829	1044.14	1245.15	1100.85	1024.85	1028.7	142.95		140.001	3815.78	3425.61	4301.16	4495.8	5028.6	5152.16	5089.09	5135.62	4650.54	4374.71	4563.88	5515.78	5661.62	4692.7	4707.36	618.719
150.001	1129.85	1013.99	876.516	1257.11	1084.12	1251.54	839.902	1154.59	1353.41	1148.1	1084.61	1108.52	155.799		150.001	3735.63	2811.39	4100.35	4356.07	5075.67	5086.81	5085.97	5128.61	4547.38	4040.24	4426.13	5425.59	5660.96	4788.61	4590.67	755.603
160.001	1233.44	1113.94	938.484	1402.8	1206.36	1377.85	926.763	1285.82	1427.07	1284.14	1185.99	1216.61	169.57		160.001	3776.73	2219.43	4083.79	4438.66	5059.86	5116.14	5040.35	5113.37	4552.9	3904.8	4327.57	5408.17	5641.88	4662.45	4524.72	868.05
170.001	1308.03	1216.47	1011.55	1460.16	1284.68	1469.8	991.228	1353.13	1566.14	1383.96	1279.88	1302.27	179.263		170.001	3677.53	628.39	4062.22	4355.05	5058.45	5163.08	5134.68	5222.95	4672.33	3729.18	4193.35	5500.25	5690.05	4744.12	4416.54	1260.41
180.001	1411.64	1273.09	1042.78	1485.15	1329.84	1545.04	1067.85	1435.3	1628.71	1429.47	1373.22	1365.64	181.532		180.001	3687.95	287.428	3755.16	4126.25	5040.3	5119.6	5170.65	5166.08	4576.82	3328.09	4036.89	5451.62	5701.89	4723.86	4298.04	1361.33
190.001	1469.88	1349.84	1140.17	1592.01	1444.29	1652.9	1145.58	1526.83	1756.28	1432.18	1475.8	1453.25	190.009		190.001	3547.28	285.333	3704.63	3889.48	5118.59	5106.94	5042.34	5363.42	4487.45	2682.16	4009.54	5279.24	5686.73	4888.9	4220.86	1416.61
200.001	1581.83	1492.19	1121.14	1634.9	1495.06	1719.54	1216.2	1638.81	1816.05	1490.7	1566.98	1524.85	203.516		200.001	3518.14	265.58	3285.36	3421.36	5007.98	5206.67	4789.89	5008.61	4451.74	1339.17	3553.96	5133.22	5604.69	4673.98	3947.17	1541.59
210.002	1632.97	1567.35	1199.33	1767.54	1550.95	1857.95	1226.43	1718.96	1872.89	1516.1	1658.06	1597.14	223.203		210.001	3345.29	251.674	2727.54	2675.33	4990.8	5122.71	4812.08	4967.77	4480.68	309.253	2979.43	5124.17	5627	4594.89	3714.9	1747.78
220.002	1721.83	1626.66	1309.79	1811.87	1649.92	1890.64	1317.54	1774.91	1940.37	1556.76	1692.43	1662.97	206.068		220.001	2969.87	262.447	1859.34	1656.6	4994.01	4956.27	4725.73	5083.35	4347.36	285.981	2177.09	4889.98	5566.22	4669.03	3460.23	1872.04
230.002	1840.5	1723.32	1323.56	1846.81	1678.02	1940.47	1397.05	1811.76	2071.11	1639.72	1722.79	1726.83	219.108		230.001	2721	268.924	327.687	301.794	4980.84	4955.15	4484.18	5132.49	4298.35	284.61	823.076	4738.54	5449.4	4677.16	3103.09	2182.78
240.002	1849.72	1764.42	1436.34	1915.73	1692.34	1996.5	1478.48	1828.24	2128.5	1676.84	1816.82	1780.36	205.64		240.001	2132	251.054	261.649	287.345	4947.61	4852.95	4234.81	4971.77	4227.04	271.322	288.25	4585.6	5448.76	4604.47	2954.62	2204.32
250.002	1918.44	1801.25	1512.35	1939.69	1804.8	2044.41	1535.19	1961.51	2179.21	1704.39	1891.13	1844.76	202.845		250.001	1120.2	249.836	265.75	258.671	4990.55	4905.94	4176.45	5019.7	4016.83	285.572	251.029	4266.91	5654.51	4537.99	2857.14	2250.41
260.002	2028.91	1889.8	1610.09	2022.12	1837.13	2092.61	1571.51	1998.25	2258.88	1766.91	1953.72	1911.81	205.464		260.001	243.522	248.171	272.127	248.086	4969.24	4787.99	3835.61	5099.85	3930.23	255.724	256.554	3658.22	5597.06	4547.81	2710.73	2264.99
270.002	2022.99	1936.04	1650.4	2032.38	1879.32	2110.61	1600.84	2005.29	2253.78	1803.64	1967.77	1933.01	192.007		270.001	218.164	247.127	251.206	257.953	4906.41	4800.1	3221.81	5008	3689.26	263.132	283.155	3206.24	5456.61	4500.55	2593.55	2196.34
280.002	2108.8	2007.36	1667.19	2072.81	1930.01	2170.31	1660.13	2054.54	2300.25	1863.1	2032.18	1987.88	197.145		280.001	239.984	274.573	245.605	243.861	4901.64	4658.53	2370.51	4914.82	3413.51	259.838	264.31	2261.83	5363.17	4504.18	2422.6	2140.21
290.002	2106.38	2063	1761.18	2126.72	1924.36	2152.6	1679.25	2007.71	2309.83	1869.03	2061.44	2005.59	183.549		290.001	216.731	230.659	243.13	261.446	4772.82	4568.08	886.332	4979.15	2921.97	285.101	264.513	479.854	5302.82	4494.64	2136.23	2197.98
300.002	2209.12	2103.96	1811.11	2184.7	1963.21	2238.71	1719.68	2050.32	2317.62	1904.56	2141.18	2058.56	188.676		300.001	209.965	239.491	230.804	243.301	4823.53	4316.89	322.342	4841.09	2358.42	278.772	272.241	337.133	5351.55	4353.11	2012.76	2190.11
310.002	2246.89	2186.32	1851.52	2243.04	2056.04	2357.2	1793.84	2119.94	2418.78	1959.99	2164.82	2127.12	197.68		310.001	214.006	274.497	251.032	249.105	4804.91	4180.15	306.607	4671.02	1260.02	274.993	251.231	343.374	5149.65	4294.15	1894.62	2135.2
320.002	2228.53	2196.36	1871.21	2265.89	2092.76	2391.12	1806.76	2186.53	2427.62	1950.2	2223.18	2149.1	200.592		320.001	176.481	233.845	206.836	212.491	4518.71	3654.63	267.281	4647.53	283.566	235.528	216.076	275.817	4958.8	4053.46	1710.08	2074.72
330.002	2253.02	2294.79	1920.02	2289.49	2123.3	2501.91	1868.73	2257.61	2447.58	1947.82	2235.82	2194.55	208.358		330.002	206.275	259.725	243.041	238.75	4462.42	3257.78	269.139	4580.36	282.265	252.819	271.187	320.263	4951.2	3878.91	1676.72	2006.24
340.003	2345.61	2325.21	1999.5	2270.56	2104.1	2457.88	1843.93	2295.78	2413.8	1943.13	2340.27	2212.71	205.745		340.002	187.759	236.149	204.38	234.63	4370.95	2188.13	271.908	4336.73	256.148	280.977	230.538	306.699	4714.86	3658.46	1534.17	1879.38
350.003	2371.47	2370.1	2136.96	2304.95	2115.63	2512.91	1874.6	2375.43	2500.73	1973.63	2377.5	2264.9	210.208		350.002	205.987	222.178	239.462	240.76	4055.64	469.44	290.424	4178.27	269.68	265.664	260.244	308.405	4526.16	3324.26	1346.9	1772.94
360.003	2384.46	2373.05	2160.97	2340.95	2157.97	2594.66	1886.99	2375.2	2531.01	1958.11	2449.41	2292.07	225.52		360.002	200.515	248.969	235.557	249.538	3641.45	296.051	257.5	3752.02	265.208	260.243	259.035	335.342	4328.01	2918.47	1231.99	1617.91
370.003	2485.39	2427.96	2232.1	2372.16	2186.28	2604.11	1912.8	2451.78	2602.52	2010.01	2477.9	2342.09	229.501		370.002	190.585	235.896	234.446	242.519	3208.18	262.196	292.022	3399.84	270.819	265.202	271.741	332.18	3685.99	2175	1076.19	1376.77
380.003	2481.19	2400.77	2268.53	2387.99	2183.49	2616	1977.03	2495.01	2659.61	2014.55	2499.51	2362.15	227.069		380.002	203.74	246.545	256.538	231.633	2255.17	280.082	264.411	2652.79	241.319	238.62	267.19	317.905	2865.88	948.259	805.006	993.084
390.003	2482.75	2509.88	2414.24	2463.34	2196.57	2712.65	1990.48	2478.89	2712.19	2079.87	2484.71	2411.42	232.784		390.002	208.534	260.098	216.959	247.81	788.684	261.968	271.576	1195.82	255.591	260.196	266.298	314.576	1503.13	268.275	451.394	410.973
400.003	2566.81	2494.23	2325.09	2475.12	2206.78	2658.4	1976.05	2503.01	2735.6	2092.45	2575.68	2419.02	240.104		400.002	204.506	230.488	216.877	276.611	260.598	268.329	276.44	289.56	248.686	268.401	270.893	333.541	350.776	239.626	266.809	40.2221
410.003	2602.25	2521.2	2386.96	2489.45	2261.32	2715.72	2043.65	2559.96	2756.72	2132.15	2568.58	2458	229.273		410.002	211.484	236.624	243.62	260.959	277.902	283.187	258.348	249.813	238.686	280.664	273.744	315.643	304.244	236.382	262.236	28.7506
420.003	2557.03	2485.22	2434.65	2504.23	2357.54	2731.91	2065.52	2578.71	2709.07	2131.63	2600.61	2468.74	213.445		420.002	225.139	250.541	228.567	265.57	251.728	289.123	259.936	249.892	253.778	259.936	249.823	302.405	299.099	252.81	259.882	22.977
430.003	2612.7	2592.71	2527.36	2513.82	2371.72	2764.03	2057.76	2580.5	2720.97	2144.88	2580.92	2497.03	221.778		430.002	194.996	238.086	232.519	253.225	270.902	243.838	269.288	247.845	260.243	255.408	277.855	338.393	301.618	226.246	257.89	34.4354
440.003	2637.37	2596.93	2548.42	2548.25	2353.37	2835.34	2106	2588.14	2801.09	2169.68	2667.8	2532.04	233.78		440.002	197.237	248.098	253.51	238.497	274.864	252.177	263.5	246.006	247.879	246.971	255.997	305.563	277.855	242.025	253.584	24.099
450.003	2632.36	2649.68	2588.01	2579.67	2361.47	2790.41	2112.78	2631.67	2863.99	2183.74	2624.28	2547.1	234.175		450.002	217.905	237.516	233.459	277.535	245.763	233.383	258.493	246.462	238.851	256.889	256.203	295.019	302.058	232.424	252.283	24.4625
460.003	2722.48	2664.83	2658.46	2635.1	2444.04	2818.7	2150.44	2647.64	2905.68	2195.13	2708.75	2595.57	238.61		460.002	187.756	225.956	230.605	254.468	258.19	251.804	275.167	264.06	243.43	235.044	268.649	314.244	272.244	222.082	250.264	30.0834
470.003	2684.63	2640.52	2713.69	2664.44	2503.83	2819.75	2188.33	2687.28	2900.94	2189	2730.48	2611.17	231.443		470.002	197.186	228.592	222.855	277.25	253.105	256.323	247.092	262.566	236.534	267.322	259.238	332.212	266.124	244.436	253.631	30.8531
480.004	2738.15	2713.44	2699.8	2682.58	2540.01	2846.29	2233.03	2715.13	2932.09	2200.72	2748.43	2640.88	231.144		480.002	213.465	224.943	237.06	258.332	231.696	233.883	265.215	250.471	255.265	243.971	266.731	316.734	272.32	223.835	249.566	26.317
490.004	2776.38	2685.89	2735.13	2638.16	2513.3	2838.36	2200.35	2678.72	2883.28	2188.83	2805.89	2631.3	238.617		490.002	191.595	247.339	227.12	262.431	256.798	242.604	272.519	242.079	241.481	283.617	242.734	308.006	277.652	218.167	251.01	29.2875
500.004	2755.05	2753.34	2795.22	2725.19	2493.79	2898.51	2202.62	2729.98	2962.76	2231.23	2789.03	2666.98	251.099		500.002	198.348	242.956	233.744	274.826	266.196	233.354	268.61	234.462	243.183	249.971	249.602	310.358	262.023	233.335	250.069	26.0727
510.004	2777.22	2741.15	2898.46	2764.48	2511.31	2890.51	2177.89	2752.88	2909.87	2195.11	2806.63	2675.05	264.948		510.002	210.566	252.573	230.399	264.658	263.462	255.775	253.092	240.896	245.015	257.132	256.738	323.402	288.254	225.648	254.829	27.3251
520.004	2786.66	2751.45	2862.59	2852.23	2547.86	2937.64	2257.08	2801.53	2930.72	2260.92	2779.81	2706.23	244.509		520.002	200.851	234.285	226.737	277.519	243.649	242.835	264.329	251.342	243.281	239.876	244.029	312.073	260.19	226.718	247.694	26.1175
530.004	2811.28	2759.97	2824.31	2750.5	2526.53	2862.61	2244.34	2737.9	2963.53	2258.57	2799.15	2685.34	239.029		530.003	192.867	237.13	223.715	244.067	234.329	240.329	248.842	253.19	247.984	260.642	242.443	329.5	287.823	207.702	246.469	32.8708
540.004	2804.82	2872.36	2889.64	2751.3	2557.67	2890.86	2228.28	2753.67	2946.16	2295.25	2805.9	2708.72	244.166		540.003	197.006	236.703	229.016	235.231	232.633	220.471	259.474	238.098	241.636	255.914	254.773	306.076	279.298	231.81	244.153	26.3577
550.004	2806.78	2884.46	2935.81	2811.03	2577.88	2855.62	2281.42	2740.98	2984.34	2314.76	2844.78	2730.71	238.583		550.003	195.743	245.798	235.87	250.681	219.37	258.99	256.31	215.573	249.49	245.708	252.924	287.595	280.301	236.088	245.031	24.1985
560.004	2864.3	2935.84	2886.44	2815.66	2606.72	2865.77	2257.02	2750.03	2996.66	2266.56	2855.18	2736.38	255.162		560.003	199.762	240.456	237.282	261.136	245.022	248.826	253.936	238.041	244.294	256.18	245.545	316.807	258.073	222.386	247.696	25.4083
570.004	2871.8	2857.26	2823.82	2790.05	2609.32	2913.32	2237.34	2826.14	3030.08	2289.35	2900.27	2740.8	257.055		570.003	184.528	238.852	228.142	254.649	239.902	237.734	251.516	240.019	235.265	249.344	240.576	278.905	272.513	246.231	242.727	21.8155
580.004	2885.08	2889.88	2923.62	2825.9	2632.1	2908.97	2269.07	2845.59	3025.61	2340.97	2887.84	2766.79	247.485		580.003	185.221	216.681	231.355	252.272	238.241	230.952	259.221	225.646	230.12	249.588	237.902	292.652	263.105	217.462	237.887	25.3829
590.004	2847.08	2857.36	2927.32	2782.77	2581.71	2902.23	2237.72	2853.57	3029.45	2256.59	2869.65	2740.49	267.018		590.003	178.848	221.779	223.506	251.13	233.054	242.876	243.99	232.168	233.509	237.509	238.282	280.864	254.178	207.12	234.201	23.4254
600.004	2814.26	2875.81	3028.67	2824.66	2555.27	2912.98	2270.11	2789.99	3058.74	2286.31	2893.55	2755.49	270.217		600.003	192.86	217.276	238.614	250.633	238.567	240.838	244.284	217.573	249.392	243.734	237.127	275.893	254.747	210.297	236.56	20.9585
610.004	2839.01	2869.4	3020.26	2847.14	2549.53	2930.71	2234.33	2844.16	3008.21	2308.65	2956.11	2764.32	274.585		610.003	193.639	233.662	218.149	245.184	238.291	219.978	263.003	237.592	215.306	231.781	256.526	280.427	233.643	201.142	233.452	23.4806
620.005	2920.88	2854.52	3015.16	2865.94	2487.9	3008.56	2237.68	2838.65	3027.78	2281.15	2918.04	2768.75	291.738		620.003	198.253	220.108	215.332	258.361	251.7	235.038	261.512	213.687	220.208	274.655	229.374	278	276.959	203.06	238.303	28.0667
630.005	2901.07	2873.84	3055.96	2806.37	2534.08	2889.08	2260.76	2789.5	3012.8	2354.72	2837.89	2756.01	259.704		630.003	200.009	233.754	201.244	233.503	239.247	233.623	252.114	228.304	223.468	245.424	260.086	280.5	253.08	225.17	236.395	21.5955
640.005	2920.42	2909.56	3038.07	2839.18	2543.72	3011.81	2270.3	2815.39	3024.39	2341.69	2824.51	2776.28	270.348		640.003	189.009	237.08	224.247	242.975	240.07	229.332	250.655	225.085	238.968	233.405	231.962	297.57	277.035	194.797	236.585	27.7219
650.005	2904.1	2948.63	3027.45	2898.29	2558.7	2975.64	2296.91	2823.46	3041.94	2349.7	2888.21	2792.09	265.601		650.003	205.813	244.485	219.057	251.313	225.003	224.538	242.702	235.617	233.037	252.31	245.465	310.405	250.219	205.354	238.951	25.9023
660.005	2850.71	2894.67	3034.97	2851.11	2541.43	2965.59	2352.65	2730	3096.05	2346.34	2856.14	2774.51	256.539		660.003	196.522	229.105	198.902	228.886	259.187	231.475	248.481	254.171	231.012	255.708	239.405	298.494	250.219	218.417	238.57	26.0565
670.005	2854.31	2910.72	3128.16	2849.95	2591.79	3022.18	2302.59	2709	3035.59	2354.61	2786.77	2776.88	268.694		670.003	189.92	235.541	219.168	232.181	236.26	236.038	241.557	227.604	201.047	233.553	237.947	286.763	247.434	206.727	230.839	23.1151
680.005	2938.33	2941.83	3078.97	2794.38	2564.57	2994.2	2319.86	2756.22	3028.49	2350.87	2782.16	2777.26	262.917		680.003	182.769	226.424	220.048	232.31	222.855	260.202	245.623	232.345	218.93	239.857	237.978	266.354	256.19	203.522	231.815	22.372
690.005	2856.76	2951.8	3095.23	2809.91	2651.22	3054.77	2271.43	2806.13	3002.8	2311.55	2880.3	2790.17	276.604		690.003	190.256	228.443	230.494	241.038	225.219	220.433	242.816	212.911	204.019	243.55	229.975	302.636	250.377	217.721	231.421	26.2343
700.005	2876.24	2916.87	3035.09	2773.98	2558.69	3012.8	2256.89	2759.51	2986.61	2297.33	2836.67	2755.52	272.51		700.003	179.715	230.013	208.006	249.139	244.332	263.237	247.367	226.614	228.639	238.167	247.32	281.918	262.811	205.544	236.63	26.4939
710.005	2876.91	3016.39	3054.47	2866.58	2629.08	3039.31	2323.46	2788.26	3045.72	2350.51	2807.41	2799.83	264.218		710.003	218.17	231.529	214.794	251.149	213.089	242.639	269.025	229.87	230.351	253.253	230.64	281.614	248.82	234.886	239.274	19.9399
720.005	2829.4	2965.53	3051.46	2828.28	2658.79	3039.46	2237.71	2764.93	3072.46	2333.81	2801.24	2780.28	278.257		720.003	191.36	227.488	216.215	244.921	206.529	231.661	243.484	235.829	246.246	233.294	234.779	279.31	251.171	198.022	231.451	22.958
730.005	2803.49	3020.34	3065.11	2894.53	2689.34	3046.68	2273.49	2810.54	3096.74	2318.22	2829.95	2804.4	282.673		730.003	195.81	222.352	214.105	245.62	233.127	229.728	251.965	237.221	222.699	226.43	251.662	276.291	259.016	215.145	234.369	21.0165
740.005	2840.53	2921.19	3035.78	2898.91	2612.92	3055.64	2312.09	2792.2	3054.18	2314.03	2866.28	2791.25	269.166		740.003	189.8	236.282	220.168	242.133	225.336	216.44	244.297	234.813	225.234	253.196	250.412	284.256	263.361	205.477	235.086	24.1882
750.005	2806.09	2908.3	3091.73	2961.46	2616.47	3114.6	2299.42	2811.64	2997.26	2393.83	2917.55	2810.76	268.839		750.003	190.645	225.352	225.696	233.725	240.228	220.218	240.772	217.671	229.487	238.025	235.706	289.241	257.061	236.227	234.29	21.8233
760.006	2817.57	2945.45	3098.05	2869.01	2653.58	3059.76	2286.39	2777.86	2992.97	2392.26	2899.44	2799.3	261.081		760.004	190.17	223.88	226.269	230.139	228.918	244.098	262.288	209.93	220.129	235.689	244.032	267.877	281.921	195.632	232.927	26.0199
770.006	2898.3	2967.97	3093.95	2830.24	2681.39	3102.72	2257.49	2794.02	3022.62	2357.88	2939.2	2813.25	280.666		770.004	204.474	244.222	224.291	217.332	212.586	243.876	261.968	210.962	236.37	225.655	224.744	253.804	238.909	218.17	229.812	17.0962
780.006	2899.51	2929.37	3125.37	2794.28	2654.33	3042.91	2300.35	2835.73	3003.19	2432.53	2940.85	2814.4	256.429		780.004	184.908	221.655	233.779	242.158	232.526	209.785	229.209	218.24	208.493	216.623	236.633	282.437	231.7	220.379	226.323	21.7685
790.006	2865.79	2974.81	3043.67	2812.21	2640.76	2977.48	2303.89	2832.87	2997.79	2353.69	2906.48	2791.77	254.435		790.004	174.55	225.561	211.076	247.108	225.301	227.658	247.332	211.494	231.037	225.326	211.912	269.203	238.254	210.572	225.456	22.2903
800.006	2871.61	2927.05	3091.55	2865.98	2723.09	2994.3	2319.3	2764.66	3030.18	2437.98	2864.74	2808.22	239.606		800.004	189.952	228.712	223.149	248.215	210.709	220.633	231.775	232.823	224.183	232.715	240.858	269.522	259.969	222.588	231.129	19.8292
810.006	2868.06	2952.55	3090.32	2933.99	2655.57	2987.32	2290.45	2788.2	2991.11	2408.43	2836.06	2800.19	252.394		810.004	183.769	227.045	222.453	243.443	205.317	244.139	248.414	228.623	224.405	262.901	222.215	270.655	248.678	204.702	231.197	23.7452
820.006	2898.01	2989.65	3100.67	2907.33	2594.11	2951.94	2311.53	2797.37	3021.68	2326.08	2802.9	2791.02	269.154		820.004	179.572	212.029	196.446	251.329	199.295	223.481	239.373	237.133	226.693	220.886	223.035	275.06	226.776	205.791	222.636	24.1484
830.006	2861.97	2991.19	3160.43	2908.29	2631.03	2989.79	2274.97	2805	2994.54	2328.83	2868.33	2801.31	280.496		830.004	182.345	239.659	220.674	243.56	231.111	217.813	241.569	220.652	223.104	251.832	234.516	281.345	260.836	215.186	233.157	23.563
840.006	2897.02	2993.44	3213.63	2887.36	2618.05	2941.74	2301.95	2835.81	2998.24	2258.38	2904.61	2804.57	295.205		840.004	178.395	226.029	237.855	235.073	228.624	208.696	258.667	220.589	222.699	235.357	210.057	291.693	243.589	215.044	229.455	26.0507
850.006	2868.12	3027.77	3186.45	2837.73	2658.16	2966.23	2254.76	2821.13	2983.47	2319.47	2892.97	2801.48	287.395		850.004	198.56	208.855	206.842	233.301	217.339	232.987	252.256	239	223.68	242.629	225.064	277.611	253.861	200.614	229.471	22.6137
860.006	2830.01	3056.76	3201.44	2861.25	2641.11	2914.61	2257.62	2793.22	2973.99	2304.05	2871.1	2791.38	290.657		860.004	169.686	235.909	208.661	224.475	236.456	211.101	228.209	210.38	224.357	213.234	234.488	257.997	227.902	217.791	221.475	19.997
870.006	2905.49	2992.03	3207.97	2895.47	2632.92	2976.61	2274.29	2797.76	2942.14	2323.21	2823.64	2797.41	284.087		870.004	189.503	201.491	225.329	229.329	213.655	238.554	235.376	213.329	226.022	238.449	229.434	300.291	246.83	215.506	228.793	25.7555
880.006	2894.24	3003.28	3118.47	2855.15	2614.7	2977.19	2232.64	2739.32	2921.32	2345.92	2806	2773.48	275.532		880.004	178.927	217.719	221.57	214.703	221.298	233.348	208.459	210.962	230.576	213.889	242.352	269.81	232.149	197.882	220.975	21.2509
890.007	2884.26	3010.33	3187.6	2938.73	2699.45	3035.86	2284.8	2791.69	2984.18	2324.69	2819.46	2814.64	284.591		890.004	175.987	224.909	203.383	226.839	231.196	231.636	230.715	223.687	199.661	256.386	218.665	268.503	236.323	202.775	223.619	23.4439
900.007	2890.19	2958.61	3121.56	2884.09	2703.95	2903.34	2262.47	2731.33	2955.74	2224.14	2773.45	2764.44	282.839		900.004	167.569	207.791	208.861	243.665	221.823	213.009	221.44	212.737	224.965	223.838	239.358	273.557	231.152	210.041	221.415	23.4803
910.007	2861.4	2908.31	3188.77	2935.39	2667.1	2944.19	2279.51	2762.09	3046.28	2244.03	2770.89	2782.54	293.773		910.004	179.06	220.029	206.763	225.744	244.209	229.987	247.256	218.775	217.895	230.313	231.64	264.032	247.361	180.117	224.513	24.1051
920.007	2794.22	2893.19	3201.58	2953.53	2592.83	2927.58	2301.85	2762.23	3074.09	2277.32	2764.52	2776.63	290.844		920.004	168.962	228.127	210.108	229.035	229.643	225.582	233.126	232.019	245.329	235.547	232.462	261.301	221.133	193.946	224.737	22.1907
930.007	2814.24	2907.24	3202.3	2908.76	2615.81	2982.34	2349.26	2628.81	3048.65	2238.23	2699.55	2763.2	292.854		930.004	188.971	242.19	207.462	246.529	236.301	234.68	229.553	216.282	221.693	224.424	218.845	282.741	247.298	187.854	227.487	24.5833
940.007	2864.21	2919.96	3219.97	3001.91	2625.48	3049.36	2286.39	2584.88	3085.52	2243.33	2699.79	2780.07	321.782		940.004	181.316	214.307	214.551	223.817	214.529	241.009	235.648	213.37	233.667	243.212	217.282	251.953	258.659	194.37	224.121	21.4851
950.007	2844.38	2918.3	3186.42	2974.11	2619.17	3042.88	2325.93	2555.08	3080.77	2242.97	2660.36	2768.21	311.37		950.004	179.822	225.067	205.886	234.329	231.348	245.62	228.31	235.867	211.765	222.743	222.193	287.006	237.361	194.705	225.859	25.0862
960.007	2803.36	2898.31	3107.34	2907.9	2639.4	3035.54	2299.46	2584.1	3097.53	2230.08	2642.52	2749.59	300.73		960.005	178.576	255.902	227.275	230.26	205.563	225.94	232.022	192.497	220.769	222.256	234.064	263.779	268.133	210.762	226.271	25.2363
970.007	2825.99	2929.2	3178.27	2876.8	2613.65	2970.22	2290.95	2600.51	3089.52	2199.1	2633.22	2746.13	311.413		970.005	178.05	215.779	202.826	248.965	212.931	235.316	205.55	229.133	211.882	220.351	207.715	274.861	233.108	198.373	219.631	23.7821
980.007	2852.22	2955.64	3190.9	2941.22	2626.28	3039.43	2302.08	2602.42	3019.58	2175.16	2604.32	2755.39	320.813		980.005	186.303	219.399	204.801	232.873	224.978	232.19	243.335	219.788	220.145	222.787	222.513	271.81	258.488	192.632	225.146	22.8852
990.007	2903.13	2849.32	3175.5	2868.7	2650.88	3033.57	2269.96	2569.48	2956.59	2181.23	2575.76	2730.37	312.092		990.005	169.284	234.57	217.247	232.877	208.465	221.598	248.636	207.706	223.914	240.443	206.893	278.747	254.431	213.984	225.628	26.1637
1000.01	2885.07	2966.39	3245.33	2894.4	2634.54	2971.57	2244.25	2510.43	2925.46	2159.42	2500.85	2721.61	337.589		1000	185.379	207.659	207.75	240.76	218.554	222.133	238.291	218.994	221.639	222.208	230.298	264.389	234.915	204.74	222.694	19.0383
