# Supplementary material for: Membrane-mediated dimerization potentiates PIP5K lipid kinase activity
Source: eLife. 2022 Aug 17;11:e73747. doi: 10.7554/eLife.73747 (PMC9470164; doi:10.7554/eLife.73747)
Supplement: Figure 7—source data 1. [file elife-73747-fig7-data1.xlsx]

## Sheet: Figure 7B
Figure 7B
	Normalized PIP2 density (0-1) measured in the presence of PIP5KB
time (sec)	mean	corral 1	corral 2	corral 3	corral 4	corral 5	corral 6	corral 7	corral 8	corral 9	corral 10	corral 11	corral 12	corral 13	corral 14	corral 15	corral 16	corral 17	corral 18	corral 19	corral 20	corral 21	corral 22	corral 23	corral 24	corral 25	corral 26	corral 27	corral 28	corral 29	corral 30	corral 31	corral 32	corral 33	corral 34	corral 35	corral 36	corral 37	corral 38	corral 39	corral 40	corral 41	corral 42	corral 43	corral 44	corral 45	corral 46	corral 47	corral 48
0	-0.00447039	0.00115143	0.000777211	0.00193859	-0.00536654	-0.00102319	-0.0049209	-0.00426708	-0.00584083	-0.00986139	0.00224186	-0.00605418	5.38209e-05	-0.00410297	-0.008777	-0.00426467	0.000679728	-0.00582601	-0.00696204	-0.00342908	-0.00161275	-0.00698005	-0.00568187	-0.00246046	-0.00332341	-0.00710356	-0.00577702	-0.00662067	-0.00512551	-0.00722184	-0.00739021	-0.00314249	-0.00958801	-0.00917119	-0.0118578	-0.00164051	-0.00164746	0.000266228	-3.44161e-05	-0.00644034	-0.00121895	-0.00688979	-0.00673697	0.000517552	-0.00721242	-0.00609042	-0.0051442	-0.00728019	-0.0068208
2	0.00454917	0.00118153	0.00343829	0.00193753	-0.0026328	-0.00343501	0.00840436	0.00552403	0.00259042	0.00403752	-0.00388376	0.000275723	-0.00433581	-0.000330917	0.00536507	0.00949279	0.00877814	0.00986863	0.000713676	0.000113667	-0.00195612	-6.5571e-05	0.00452228	0.00110852	-0.000793939	-0.000801091	0.00383578	0.00451729	0.00106822	0.00397388	-0.000261935	0.00396629	0.00543871	0.0120721	0.0110039	-0.00368288	-0.000940587	-0.00163547	-0.000590025	0.00471597	-0.000576939	0.00480807	0.00576393	0.00554479	0.00226503	0.00268005	0.00634527	0.00643915	0.000169786
4	-0.00913165	0.00579929	-0.00111809	-0.00434901	0.000450912	0.00227117	0.0013243	0.000700111	0.00387785	-0.00201503	-0.00210694	0.0033282	0.00217695	0.000813488	0.00311232	0.00124824	0.000477596	0.000406516	0.000297154	0.000174074	0.000482896	0.00164544	0.00246413	0.00171016	0.000928566	0.00108253	0.00134296	0.000980998	0.00160459	0.0022365	0.00292201	0.00155533	0.00149176	0.0005248	-0.00105055	-0.000921835	0.000686155	0.00221477	0.000438991	0.00118263	0.00194501	0.000362978	-0.000719	-0.00016961	0.0011852	-9.20158e-05	-0.00212492	-0.000253231	-0.000708301
6	0.00905286	0.00638785	0.005491	-0.00602752	0.00303566	0.00662144	0.00339173	0.00258173	0.00484515	-0.00038815	-0.00402131	0.0044815	-0.00306499	0.000840286	0.00294965	-0.00220519	-0.00533688	-0.00241513	0.0050542	0.00123647	0.00166987	0.00398217	0.00539195	0.00263651	0.00155417	0.00229742	0.00326314	0.00259796	0.00336636	0.00110016	0.0027541	0.000596567	0.000653086	-0.000569984	-0.00417003	0.00203057	0.00313574	0.00301764	0.00327824	0.00316789	0.00488822	0.00211611	8.1191e-05	-0.00104247	0.00174442	0.00257866	-0.00253079	-0.00134064	-0.00219772
8	-0.00235043	0.00599797	0.00479776	-0.00679506	0.00227584	0.00774115	-0.000439835	0.00227248	0.00128733	-0.00160691	-0.00584116	0.00353316	-0.00453409	0.000963923	0.000156098	-0.00626989	-0.0105073	-0.0089246	0.00496246	0.000275326	0.00235768	0.00361351	0.00257813	0.00196304	0.000210093	0.00227081	0.00143688	-5.02009e-05	0.00274792	-0.000585602	0.000643376	-0.00133863	-0.00374153	-0.00694984	-0.0109905	0.0025999	0.00326421	0.00301986	0.0029833	0.000102107	0.00329439	-0.000282627	-0.00227711	-0.00386051	0.00043986	0.00256176	-0.00629167	-0.00441177	-0.00372349
10	-0.00572057	0.00931487	0.00963854	-0.00216164	0.00592926	0.0101526	0.00437206	0.00759513	0.0060729	0.00112083	0.000417147	0.00487079	-0.000339933	0.0027186	0.0032856	-0.00102367	-0.00518165	-0.00152805	0.0100779	0.00215418	0.00683425	0.00536486	0.00870182	0.00543474	0.00306211	0.00355874	0.00503167	0.00400759	0.00597601	0.00114583	0.00637625	0.00390201	0.00340077	0.00118555	-0.00460019	0.00474326	0.00636278	0.0057842	0.00752761	0.00231304	0.00515139	0.00261201	0.00141247	0.000139565	0.00570504	0.00719754	-0.00064003	-0.000305739	-0.00103633
12	-0.00882052	0.0122996	0.00926586	-0.00266366	0.00480571	0.00795954	0.00334803	0.00499754	0.00286423	-0.00241214	-0.00412912	0.00562125	-0.00495174	0.000583673	0.0009611	-0.00241365	-0.00883599	-0.0045571	0.00727874	0.000829525	0.00590206	0.00409127	0.00782491	0.0056518	0.000636046	0.00246909	0.00344921	0.00220984	0.00540957	0.00218442	0.00374064	0.00157598	-0.00186007	-0.00305477	-0.0103115	0.00350112	0.0077938	0.00437992	0.00659724	0.00169105	0.00540222	-0.000200078	-0.00161461	-0.000976565	0.00323927	0.00598395	-0.00588454	-0.00420357	-0.0030754
14	0.0200274	0.0103737	0.00903251	0.00205065	0.0033347	0.00499315	0.00235751	0.00478232	-0.00113102	-0.00125255	-0.00298986	0.00113137	-0.00754591	0.000142112	-0.000546775	-0.00330089	-0.00888695	-0.00411903	0.0077644	0.00220513	0.00645654	0.0018398	0.00404697	0.00310468	0.000722748	0.00192932	0.00248506	0.0025613	0.00385805	0.00228283	0.000448162	-0.00159939	-0.0047594	-0.0017308	-0.00960557	0.00589684	0.00743943	0.00197574	0.00717484	0.000262686	0.0028205	-0.00100499	-0.00142126	-0.000108938	0.00262393	0.00770208	-0.00500287	-0.00478462	-0.00259581
16	-0.00784577	0.0117661	0.00476521	0.00418999	0.00448496	0.00162482	0.00358787	0.00594696	0.00119467	0.00223853	0.00149691	0.00300598	0.000143379	0.00421788	0.00580905	0.00591826	-0.000953763	0.00155463	0.00754968	0.00243967	0.0089636	0.0017165	0.00478532	0.00473269	0.00265723	0.00293107	0.00376776	0.00441425	0.00456648	0.0070056	0.00393904	0.00272739	0.00133703	0.00563229	-0.00017245	0.005832	0.00729993	0.0026484	0.0080339	1.07292e-05	0.000939202	0.00182349	0.00131852	0.00282386	0.00590994	0.00849648	-0.00131655	-0.000365371	0.00103235
18	-0.00156066	0.0154484	0.00799786	0.00742707	0.00879406	0.00337953	0.00779956	0.00742348	0.00728187	0.00507359	0.0073972	0.00580871	0.00410331	0.00636518	0.0108517	0.0106147	0.00659515	0.0132401	0.0100191	0.00718303	0.011963	0.00401352	0.0122983	0.00797501	0.0062665	0.00486937	0.00833856	0.00968192	0.00687171	0.0112462	0.00931061	0.00659757	0.011007	0.0141023	0.00993678	0.00692323	0.00899288	0.00641608	0.0103572	0.00444677	0.00526629	0.00679725	0.00612092	0.00831456	0.0112471	0.0112644	0.00563527	0.00357886	0.00389639
20	0.0150079	0.0149478	0.00804976	0.00858649	0.00799689	0.00304158	0.00736815	0.00716044	0.00479381	0.00699933	0.00744256	0.00762854	0.00369836	0.00710092	0.0125235	0.00969684	0.00600542	0.0102317	0.00814582	0.00901245	0.0099774	0.00350588	0.0111539	0.0085381	0.00685035	0.0052416	0.00757452	0.00985133	0.00659173	0.011474	0.00677624	0.00694689	0.0123654	0.01422	0.0141138	0.00714983	0.00659327	0.00628244	0.0105238	0.00495397	0.0047124	0.00701991	0.00686294	0.00875225	0.00849861	0.0106609	0.00603734	0.0030837	0.0041752
22	0.0206271	0.0142681	0.00690237	0.0081517	0.00623748	0.00221109	0.0083002	0.00852469	0.00584605	0.0076275	0.0100129	0.00635047	0.00534442	0.00754979	0.014732	0.0102788	0.00851006	0.0118056	0.00835838	0.00899224	0.0115364	0.00209226	0.010619	0.00679755	0.00603801	0.00512977	0.00756325	0.010754	0.00542794	0.00959403	0.00672641	0.00856023	0.0148951	0.0156449	0.0187409	0.00620772	0.00730597	0.00684063	0.0106	0.00492727	0.00276497	0.00880502	0.00820677	0.00978115	0.0097147	0.00978438	0.0104033	0.00548891	0.00409656
24	0.0222152	0.00984966	0.0103333	0.00750903	0.00604278	0.00281596	0.00712851	0.00677925	0.0030412	0.00604661	0.00823392	0.00580767	0.00163895	0.00481292	0.0122719	0.00707462	0.00460382	0.00815333	0.00764551	0.00617374	0.0095096	0.00176101	0.00997188	0.00853086	0.00436005	0.00271835	0.00593926	0.00757591	0.00385826	0.00657975	0.00590597	0.00802763	0.0140703	0.010516	0.0135957	0.00523059	0.00811882	0.00567861	0.00910214	0.0048363	0.00258625	0.00798872	0.00826704	0.00725213	0.0062943	0.00843907	0.00903745	0.00362852	0.00375444
26	-0.00110074	0.00705509	0.0100038	0.00669453	0.00400478	0.00356934	0.0043148	0.00405075	-0.00124163	0.00281638	0.00358723	0.00254816	-0.00318555	0.000801713	0.00569326	0.00070337	-0.00160944	0.000729498	0.00505787	0.00246417	0.00764479	-0.00121711	0.00561651	0.00692183	0.00232912	0.001352	0.00312908	0.00380278	0.00124276	8.53911e-05	1.51871e-05	0.00382814	0.00802968	0.00363698	0.00619163	0.00217471	0.00656995	0.00329079	0.00527982	0.00307158	0.000855336	0.00476909	0.00431128	0.00411871	0.00131144	0.00614231	0.00515715	-0.00190521	0.00177604
28	-0.00918243	0.00659006	0.00906102	0.00699698	0.00263081	0.00177667	0.00543342	0.0034122	-0.00153004	0.00330851	0.00290368	0.0022453	-0.000968561	0.00380981	0.00528597	0.000596381	-0.00404909	-0.00207055	0.00618317	0.00118401	0.00789617	-0.00112286	0.00540927	0.00691792	0.00322796	0.000938303	0.00205816	0.00577099	0.00279908	0.00107588	-0.000611864	0.00442694	0.00896203	0.00351326	0.00744538	0.00285791	0.00564508	0.00277095	0.0067767	0.00374449	-0.000377975	0.00452104	0.00372955	0.00373781	0.00205366	0.0067608	0.00497433	9.05159e-05	0.00440111
30	-0.00623877	0.00713025	0.00762816	0.00560917	-0.000441834	0.00204183	0.00303096	0.00130361	-0.00123349	0.00181119	0.00125682	-0.000910484	-0.00162302	0.0033311	0.00375669	0.0029733	-0.00534069	-0.000606095	0.00817015	-0.00191374	0.00562672	-0.00310284	0.00246997	0.00530674	0.00143526	-0.00118528	0.00183729	0.00350126	0.00188437	-0.000665036	-0.00350595	0.0028864	0.00520838	-0.00161023	0.00329865	0.00177324	0.00560011	0.00253132	0.00375403	0.00118612	0.000407087	0.00511488	0.00191908	0.00219446	0.000662086	0.0050769	0.0020115	-7.10797e-05	0.00360411
32	0.0218761	0.00883697	0.01245	0.00893909	0.00445032	0.00491468	0.0073049	0.00430245	0.00162062	0.00664973	0.00490413	0.00165501	0.00438253	0.00827638	0.00701013	0.00533324	-0.00199062	0.00668223	0.0128869	0.00208561	0.00867787	0.00170856	0.0073353	0.010455	0.0052392	0.000742699	0.00562704	0.00809973	0.00578455	0.00429758	0.00418135	0.00589659	0.0135581	0.00480613	0.00961998	0.0067452	0.00689371	0.00592349	0.00812442	0.00424224	0.00444942	0.00828814	0.00582775	0.00625521	0.00457096	0.0095541	0.005975	0.00382675	0.00796288
34	0.0101179	0.0120438	0.0126204	0.0114052	0.00626753	0.0050452	0.0100753	0.0070583	0.00571875	0.0114865	0.00881452	0.0035669	0.0103549	0.0123741	0.0113364	0.0108647	0.000794961	0.0121077	0.014645	0.00479791	0.0117458	0.00313095	0.00990078	0.0101925	0.00713809	0.00289971	0.00955936	0.0104348	0.00759099	0.00709938	0.00668136	0.00851595	0.0189607	0.0104272	0.0169378	0.00540862	0.00687477	0.0093189	0.00865726	0.00497347	0.00662396	0.0102573	0.00683636	0.00884937	0.0108836	0.0126431	0.0114771	0.0079452	0.00872271
36	0.0243633	0.0141786	0.015481	0.0141211	0.00807243	0.00454268	0.0136934	0.0102207	0.0115313	0.0154084	0.0153975	0.00668561	0.015683	0.0156731	0.0186662	0.014377	0.00785104	0.0232718	0.0163933	0.0104429	0.0145186	0.00862073	0.0167755	0.0128299	0.0109492	0.0053262	0.0131862	0.0141221	0.0124984	0.0137698	0.0152362	0.0137913	0.0316836	0.0196723	0.0245643	0.00864049	0.00981989	0.0138725	0.0123342	0.0077992	0.010445	0.0144118	0.0117166	0.0132728	0.0161901	0.0159606	0.0158705	0.0155274	0.0133583
38	0.00720791	0.0136235	0.0172806	0.0153599	0.00868909	0.00434171	0.0135563	0.0121116	0.0115123	0.015522	0.0166971	0.00770498	0.0152141	0.0131313	0.020165	0.0153514	0.0103626	0.0252382	0.0167252	0.0111269	0.0147734	0.00934698	0.0162911	0.013089	0.011434	0.00677322	0.0144806	0.0131693	0.0118023	0.0125002	0.0143473	0.013836	0.030906	0.0217325	0.0239538	0.00999402	0.0113507	0.0150285	0.011074	0.00860785	0.011531	0.0156021	0.012639	0.0124732	0.0150955	0.0150588	0.017145	0.0148678	0.0131985
40	0.020707	0.0150113	0.020268	0.0149695	0.0142676	0.00432038	0.0148024	0.0144423	0.0140164	0.017007	0.0182307	0.00986306	0.0156137	0.0150163	0.0221739	0.0145321	0.0115371	0.0254842	0.0163061	0.01248	0.0181228	0.0119696	0.0202731	0.0140946	0.0137541	0.00863043	0.0162212	0.0165937	0.0119944	0.0152168	0.0181282	0.0159232	0.034633	0.028618	0.0256893	0.0119849	0.0120652	0.016059	0.0141212	0.01195	0.0107185	0.0169263	0.0137838	0.0146741	0.0188896	0.0161888	0.0182998	0.0155235	0.0140296
42	0.0201292	0.0125085	0.019001	0.0124082	0.010485	0.00325175	0.0083896	0.0109827	0.0113047	0.012363	0.0130344	0.0065371	0.0109138	0.00991229	0.0189453	0.00984729	0.00764748	0.019092	0.0127945	0.00941165	0.0139858	0.00872481	0.0146811	0.0098328	0.0117269	0.00577332	0.01252	0.0118575	0.00872367	0.0126273	0.0122946	0.0107536	0.0255178	0.0219211	0.0157107	0.00635412	0.00953673	0.0129087	0.00882641	0.00846554	0.0101434	0.01281	0.00991869	0.00994786	0.0156434	0.0121355	0.0129228	0.0112449	0.00951317
44	0.0231758	0.00694527	0.0147888	0.00575922	0.0067139	0.0009773	0.00674659	0.0081737	0.00903344	0.0103026	0.0109667	0.00421634	0.00643849	0.00614694	0.0134508	0.00382193	0.00448026	0.0133116	0.00810705	0.00312328	0.00954055	0.00791518	0.0148386	0.00882131	0.00930206	0.00312689	0.00785352	0.0112091	0.0075365	0.00986499	0.00970286	0.00958477	0.0239059	0.0195745	0.013748	0.00392044	0.00567423	0.00894058	0.00981403	0.00672731	0.00728409	0.0125258	0.00763781	0.00870399	0.0122904	0.00863275	0.00955917	0.00925078	0.00850109
46	-0.00118472	0.00993561	0.0135985	0.00423439	0.00586603	0.00195905	0.00645526	0.00908948	0.00727102	0.00976637	0.00954638	0.00380539	0.00607315	0.00553911	0.012725	0.0054067	0.00446407	0.0116741	0.00876823	0.00148068	0.00720645	0.00607271	0.0137627	0.00867412	0.0071369	0.00217424	0.00607926	0.0118046	0.00663599	0.00869555	0.00698692	0.0109861	0.0191914	0.0183104	0.0143715	0.00352055	0.00473333	0.00712246	0.0101702	0.00548642	0.0050656	0.0114834	0.00607928	0.00877609	0.0124323	0.00753029	0.0105788	0.00880385	0.00710093
48	-0.00324205	0.0083956	0.0109261	0.00212728	0.00473309	0.00276449	0.00550246	0.00811574	0.00586755	0.00934939	0.00834742	0.00200015	0.00266823	0.00350326	0.00970686	0.00246549	0.00180491	0.00919585	0.00652775	0.000519749	0.00464641	0.00462566	0.0131958	0.00873519	0.00544403	-0.000290415	0.00337308	0.00856834	0.00431655	0.00461862	0.00687749	0.0101676	0.0155667	0.0142691	0.0119115	0.000386729	0.00311242	0.00431775	0.0104104	0.00337056	0.00290629	0.00912963	0.00360839	0.00774777	0.0107601	0.00609963	0.00530395	0.00758375	0.00476304
50	0.0178071	0.00573161	0.0101101	0.00386513	0.00162246	0.00352825	0.00516803	0.00859603	0.00512543	0.00925157	0.00804658	0.00203535	0.0044807	0.00346793	0.0102473	0.00181561	0.00504309	0.00871671	0.00464544	0.000464502	0.00451033	0.00563864	0.0146314	0.0106519	0.00517278	0.000187454	0.00184816	0.00853483	0.00563318	0.00328921	0.00820417	0.0103528	0.0167204	0.0147721	0.0127704	-0.00201441	0.00187982	0.00392065	0.0104584	0.00156847	0.003658	0.00995872	0.0041353	0.00763457	0.00992795	0.00724238	0.00780868	0.00841024	0.00613502
52	0.0125257	0.00729072	0.010124	0.00580276	0.00522808	0.00416912	0.00863064	0.0115221	0.00726121	0.0126515	0.0130236	0.00473977	0.00676787	0.00784842	0.0125685	0.00793274	0.00921955	0.0127596	0.00684305	0.0043426	0.00941316	0.00828656	0.0196711	0.0133317	0.0080077	0.00341555	0.00388976	0.0135726	0.0082944	0.00594979	0.0126736	0.0145278	0.0243366	0.0219632	0.0226897	0.00249146	0.00348178	0.00572485	0.0156783	0.00704888	0.00362021	0.0152447	0.00587421	0.0121408	0.0126151	0.0126851	0.0121886	0.0132123	0.00924355
54	0.0228281	0.0133185	0.0155476	0.0155646	0.0114408	0.0077071	0.0115246	0.0174507	0.0113593	0.0152929	0.0178824	0.0100241	0.012951	0.0137747	0.0167462	0.0150185	0.016887	0.0222072	0.0136142	0.0128669	0.0147785	0.0125464	0.0242909	0.0174135	0.012903	0.00785502	0.00987317	0.0185213	0.0122748	0.0099389	0.0185034	0.0204613	0.0293144	0.024883	0.030142	0.00832081	0.00772801	0.0109834	0.0199871	0.0112496	0.00746782	0.0202744	0.0117786	0.0166431	0.0158997	0.0170081	0.0167096	0.0184556	0.0131528
56	0.0211626	0.010924	0.0168149	0.0164813	0.0127229	0.00881723	0.0120974	0.0166522	0.0131017	0.0146645	0.0180446	0.0109357	0.0123076	0.0139462	0.0158968	0.015257	0.0148855	0.0259909	0.0143691	0.0129626	0.0167639	0.0138106	0.0250722	0.0171966	0.0157944	0.00916525	0.0127494	0.0188843	0.0128748	0.0107571	0.0207614	0.0183079	0.0291094	0.0251629	0.0328138	0.00813871	0.00793622	0.012941	0.0190548	0.0144141	0.00863057	0.0213378	0.0128324	0.0159499	0.0161236	0.0182511	0.0155453	0.0191859	0.0143956
58	0.0240058	0.0138265	0.018783	0.0170431	0.0143517	0.0122245	0.0134505	0.0187162	0.0151354	0.014947	0.019144	0.012068	0.014345	0.0158315	0.0212643	0.0182343	0.016643	0.0276685	0.0180142	0.0126792	0.0203759	0.0152729	0.0262786	0.0163282	0.016347	0.0112843	0.0141327	0.0205717	0.0159033	0.0146198	0.0232147	0.0206342	0.0342261	0.0265589	0.0355221	0.0106094	0.00971724	0.0148124	0.0217217	0.0153678	0.0104506	0.0239738	0.0142919	0.01903	0.0183103	0.0193878	0.0196274	0.0210204	0.0161322
60	0.0223337	0.0137477	0.0187207	0.017201	0.0170383	0.0116224	0.0148483	0.0195731	0.0150023	0.0153946	0.0198326	0.0123848	0.0136055	0.0159516	0.0175787	0.0204787	0.0156704	0.027868	0.0176089	0.0132483	0.0211936	0.0140668	0.0255833	0.0147511	0.017106	0.0118009	0.0142413	0.0209764	0.0159538	0.0159481	0.0219838	0.0212436	0.0338816	0.0234292	0.0372749	0.0102041	0.0111087	0.0163907	0.0224859	0.0170661	0.0101637	0.0243507	0.0142375	0.0199079	0.0174709	0.0198293	0.0190896	0.021289	0.0157639
62	0.0233499	0.0145542	0.0196307	0.0157247	0.0187866	0.0145453	0.01595	0.0208597	0.0176471	0.0169472	0.0213645	0.0134706	0.0135437	0.0166131	0.0195713	0.0202548	0.0147326	0.0304213	0.0179528	0.0124656	0.0200671	0.013042	0.0280125	0.0159325	0.017361	0.012023	0.0159851	0.0190514	0.0180043	0.0151555	0.0226689	0.0242389	0.0361761	0.0239256	0.0386752	0.00995516	0.0126122	0.0176495	0.022244	0.0167565	0.0113685	0.0243613	0.0164491	0.0186055	0.0172758	0.0180345	0.0182718	0.020488	0.0173947
64	0.0235349	0.0143024	0.0185915	0.0132432	0.0188686	0.0164284	0.0157558	0.0204134	0.0191169	0.0172741	0.0199969	0.0133782	0.0124968	0.016054	0.0207337	0.0191935	0.0148083	0.0298747	0.0172636	0.0106869	0.0210718	0.0132643	0.0279631	0.0160444	0.0172285	0.0122206	0.0147856	0.0176502	0.0180709	0.0140571	0.0238632	0.0231801	0.0396223	0.024158	0.0393326	0.00922338	0.012091	0.0173739	0.0220477	0.0182122	0.0106898	0.0237017	0.0155228	0.018507	0.0175925	0.0171645	0.0186006	0.0182493	0.0177501
66	0.0246123	0.0147672	0.0174537	0.0147625	0.0203334	0.0161261	0.0158079	0.021752	0.0188692	0.0177658	0.0220733	0.0140266	0.0136574	0.0167223	0.0212967	0.0195639	0.0160475	0.0275054	0.0164368	0.0133659	0.0210192	0.0137402	0.0286598	0.0167797	0.0171307	0.0125574	0.01306	0.019591	0.016646	0.0144695	0.0230546	0.0235824	0.0429194	0.0225787	0.0396119	0.0076733	0.0123669	0.0169621	0.0220491	0.016621	0.00986966	0.0238029	0.0151884	0.0200539	0.0190569	0.0169775	0.0205008	0.0192709	0.0186304
68	0.0236414	0.0142746	0.0162257	0.0156922	0.0214235	0.0128168	0.0159945	0.0224991	0.0181895	0.0191461	0.0229039	0.0146454	0.0145898	0.0183478	0.0166547	0.0224702	0.0162371	0.03044	0.0158357	0.0144829	0.0200105	0.0139325	0.0279458	0.0194069	0.0167726	0.0128167	0.0138834	0.0210925	0.0169608	0.0154136	0.0228364	0.0244878	0.0445679	0.0252397	0.0425947	0.00657507	0.0129268	0.0176093	0.021833	0.0169709	0.00945323	0.0238948	0.0159647	0.020819	0.0192149	0.0173343	0.0205141	0.0183246	0.0203791
70	0.0243231	0.0144838	0.0154191	0.0168772	0.0205427	0.0127037	0.0164354	0.0223115	0.017491	0.018798	0.0221071	0.0141907	0.0115648	0.0171247	0.0194933	0.0224201	0.0149045	0.0300107	0.0169481	0.0154758	0.0195787	0.0150968	0.0278187	0.0203763	0.0164552	0.0126259	0.0158898	0.0212158	0.0186288	0.0148011	0.0251953	0.0252122	0.0455915	0.0252983	0.0448771	0.00663336	0.0117215	0.0157562	0.0215908	0.0184171	0.00959069	0.0234731	0.0165841	0.0201469	0.0202626	0.0170245	0.0208957	0.0197775	0.0197659
72	0.0246441	0.0164772	0.0158326	0.0177594	0.0186301	0.0122497	0.0184266	0.0221676	0.0154804	0.0178254	0.0221132	0.0134704	0.0140725	0.0169097	0.019023	0.0243301	0.0170094	0.0298921	0.0179037	0.0156848	0.0199547	0.0176742	0.0265418	0.0198807	0.0174471	0.0127227	0.015247	0.0221722	0.0176586	0.015274	0.0222801	0.0246319	0.0441595	0.025283	0.0459198	0.00629334	0.0109832	0.0162284	0.0204534	0.0196243	0.0102312	0.0238574	0.0161865	0.021718	0.0215206	0.0177163	0.0222374	0.0206966	0.0181923
74	0.024548	0.0187158	0.0156705	0.0196315	0.017412	0.0100422	0.0173944	0.0226767	0.015105	0.0197328	0.0225227	0.0130976	0.016106	0.018413	0.0199326	0.0263454	0.016409	0.029885	0.0176158	0.0175759	0.0197638	0.0172222	0.028007	0.0196169	0.0170589	0.0140141	0.016189	0.0228673	0.0184038	0.0164178	0.0205625	0.0256877	0.0436543	0.0257907	0.0455804	0.00553423	0.0141042	0.0165159	0.0196451	0.0187806	0.0107989	0.0229958	0.0156362	0.0214447	0.022133	0.0181058	0.0227983	0.0233004	0.0170166
76	0.0259138	0.0221361	0.0156795	0.0209393	0.0162549	0.0104156	0.0184548	0.023478	0.0161121	0.0215026	0.0215337	0.0135927	0.0151418	0.0194543	0.0185011	0.026127	0.016154	0.0309721	0.0173431	0.0160332	0.0213147	0.0179323	0.0276528	0.0202193	0.0181671	0.0136491	0.0166285	0.02272	0.0193569	0.0183889	0.0223831	0.0265447	0.0407768	0.0271392	0.0452538	0.00742252	0.0136241	0.016525	0.0208391	0.0206198	0.0130037	0.0259192	0.0174067	0.0224395	0.022372	0.0198089	0.0233109	0.0221664	0.0160278
78	0.0250581	0.0231694	0.0188921	0.0210025	0.0155679	0.0109751	0.0179426	0.0240184	0.0162463	0.020901	0.0220923	0.0142098	0.0165183	0.0180795	0.0221044	0.0246976	0.0151357	0.0278305	0.0165198	0.0147658	0.0211114	0.0163551	0.0275061	0.018788	0.0195647	0.0149531	0.0172457	0.0232925	0.0193638	0.0186548	0.0250763	0.0264577	0.0415233	0.0285065	0.0458669	0.00936955	0.0143314	0.016889	0.0202258	0.0203176	0.0147345	0.0263615	0.0178099	0.0224748	0.0217178	0.022953	0.0231658	0.022176	0.0154574
80	0.0259061	0.0249486	0.0209193	0.0212439	0.015022	0.0120276	0.0165787	0.0235841	0.0193108	0.022787	0.0244542	0.0151851	0.0207583	0.0195812	0.020475	0.0245544	0.0162132	0.029341	0.0164017	0.0154161	0.0208331	0.0174533	0.0281216	0.0180601	0.0208523	0.015242	0.0172984	0.0233041	0.0185198	0.0195755	0.0239162	0.0243413	0.0423428	0.0293973	0.0454003	0.00983767	0.0153982	0.0185143	0.0194214	0.0197859	0.0157977	0.0280885	0.0181558	0.0224833	0.0216404	0.0238858	0.0238598	0.0207933	0.0169282
82	0.0268864	0.0238993	0.0213771	0.0231796	0.0158701	0.0119572	0.0150414	0.0249713	0.0215891	0.0216467	0.0247409	0.017416	0.0191172	0.0183864	0.0211493	0.0224689	0.0157011	0.0289369	0.0165484	0.0151576	0.021058	0.017674	0.0284711	0.0180813	0.0200259	0.0176262	0.0176508	0.0237064	0.0196676	0.0204592	0.0258665	0.0222443	0.0439276	0.0288098	0.0438617	0.00941406	0.0152567	0.0182904	0.0210954	0.0181923	0.0162392	0.0279004	0.0175289	0.0236942	0.0233278	0.0240951	0.0245136	0.0209901	0.0183053
84	0.0277977	0.0241622	0.0246869	0.0216596	0.0171739	0.0137665	0.0176462	0.0251348	0.0211467	0.0201258	0.0277867	0.0201192	0.0177908	0.0179692	0.0225094	0.0228071	0.0164963	0.0298047	0.0184826	0.0150416	0.0219773	0.0161639	0.0272123	0.0184706	0.0205848	0.0162765	0.0176249	0.024188	0.0185528	0.0200991	0.0266954	0.0222965	0.0453632	0.0311121	0.0446053	0.00831719	0.0161645	0.0175721	0.0204706	0.0182742	0.0169855	0.028143	0.0192376	0.0237399	0.0223774	0.0250431	0.0251505	0.0213147	0.0199418
86	0.0270893	0.0209686	0.0235725	0.0196546	0.0168924	0.0128519	0.0173254	0.0235967	0.01798	0.016124	0.0248995	0.0174842	0.0152033	0.0151538	0.0219158	0.0197675	0.015575	0.0255386	0.0179513	0.0147763	0.0183987	0.0122118	0.0246603	0.0161783	0.0172311	0.0150837	0.0182865	0.0212267	0.0195832	0.0163274	0.0236868	0.0221626	0.04491	0.0288862	0.042508	0.0068498	0.0154214	0.0164166	0.0193596	0.0158598	0.0154241	0.0233198	0.016509	0.021283	0.0190686	0.0219926	0.0224217	0.0192256	0.0175297
88	0.0259158	0.0205245	0.0201303	0.02004	0.0189759	0.0145171	0.0171921	0.0214362	0.0196689	0.0174657	0.0251685	0.0179809	0.0146132	0.0167655	0.0212358	0.0200534	0.0183851	0.0287746	0.0175397	0.0174441	0.0178686	0.0140092	0.0267098	0.0176859	0.0181494	0.0145615	0.0209304	0.0215365	0.0210366	0.0151851	0.0236877	0.0216396	0.0432494	0.0268533	0.0411137	0.00736966	0.0162723	0.0152114	0.0197546	0.0165955	0.0161247	0.022878	0.0157376	0.0212968	0.0191869	0.0198705	0.0237421	0.0227666	0.0170495
90	0.0151674	0.0195334	0.017251	0.0184061	0.019243	0.0134139	0.0181587	0.0229055	0.0181807	0.0155987	0.0250871	0.0185714	0.012984	0.0157933	0.0223549	0.0182957	0.0162311	0.0274423	0.0183146	0.0171025	0.0201656	0.0126325	0.0267031	0.0183193	0.0180166	0.0143005	0.0211746	0.0220622	0.0209898	0.0155498	0.0246117	0.0233191	0.0432393	0.0289599	0.0401011	0.0078197	0.0187875	0.0156242	0.0206307	0.0164364	0.0152182	0.0215083	0.0150988	0.0229739	0.0187277	0.0199794	0.0229362	0.0249659	0.0164978
92	0.0289612	0.0184177	0.0153019	0.0151898	0.0167914	0.0125853	0.0156702	0.0183298	0.0151956	0.0161523	0.0221124	0.0141609	0.0125058	0.0143182	0.0214319	0.0148742	0.0151631	0.0247953	0.0149585	0.0152372	0.017911	0.00924917	0.0241217	0.0165321	0.0169617	0.0097793	0.0198773	0.017842	0.0184399	0.012564	0.0227752	0.021826	0.0355671	0.0251872	0.0343747	0.00566346	0.0174747	0.0143447	0.0182488	0.0143712	0.0117433	0.020294	0.0145246	0.0186168	0.0143864	0.0168757	0.0185614	0.025506	0.0123286
94	0.0266008	0.0187331	0.0122854	0.0145347	0.0174506	0.0122605	0.015071	0.0172345	0.0151332	0.0167431	0.0195326	0.0127554	0.01108	0.0137554	0.01896	0.0139016	0.0123242	0.0223121	0.0134025	0.0152527	0.017457	0.0109708	0.0257706	0.0161681	0.0171842	0.0101096	0.0214439	0.0169956	0.0199313	0.0129005	0.0241014	0.0190413	0.0334677	0.0253645	0.0322467	0.00945676	0.0169838	0.015412	0.0188912	0.0148758	0.0125503	0.021268	0.0137324	0.0190971	0.0167462	0.016721	0.017359	0.0251285	0.0133082
96	0.0116281	0.0198573	0.0150013	0.0149168	0.0188085	0.0137557	0.0144532	0.0203743	0.0192092	0.0192545	0.0234776	0.0160047	0.0136094	0.016608	0.0221706	0.0181477	0.016139	0.026934	0.0130933	0.0170913	0.0195978	0.014248	0.0279096	0.018085	0.0196564	0.0124885	0.0235448	0.0200061	0.0193759	0.0160588	0.0277354	0.0217545	0.037043	0.0243719	0.038398	0.0110762	0.0172053	0.0169031	0.0224231	0.017467	0.0140948	0.0248492	0.0167042	0.0217748	0.0218319	0.0188672	0.0213315	0.0279336	0.0167887
98	0.0271195	0.0203937	0.017237	0.0136107	0.0153594	0.0134522	0.0139055	0.0205691	0.0179679	0.0187136	0.0219465	0.0153198	0.0120664	0.0155545	0.0210207	0.0149479	0.0138562	0.0234108	0.0126496	0.0147664	0.0209179	0.0140574	0.0262488	0.0169295	0.0192688	0.0120968	0.0201179	0.0190097	0.0182008	0.0152568	0.0246315	0.0211121	0.0348516	0.0235516	0.0347379	0.00987721	0.0172446	0.0172487	0.0223316	0.0168659	0.0119129	0.0251045	0.0157213	0.0202857	0.021958	0.0201924	0.0216146	0.0245814	0.0149651
100	0.0273539	0.0228833	0.0190916	0.0154717	0.0155642	0.0156887	0.0137664	0.0208271	0.0183404	0.0208714	0.023086	0.0153017	0.0116081	0.0163877	0.0220819	0.0186766	0.0169546	0.0259209	0.0132705	0.015852	0.0204058	0.0142873	0.0287601	0.0190746	0.0206954	0.0131611	0.0207287	0.0180497	0.0182436	0.0155654	0.0241489	0.0191035	0.0344899	0.0218625	0.035096	0.012871	0.0176005	0.0172637	0.0227085	0.0174996	0.0130394	0.0248245	0.0168455	0.0190502	0.0229888	0.020862	0.0231865	0.0227941	0.0161628
102	0.022778	0.0241514	0.0215896	0.0180911	0.0184857	0.0157051	0.0153404	0.0247788	0.0225831	0.0224733	0.0270447	0.0198018	0.0130292	0.0206903	0.0213844	0.0233793	0.0194783	0.0310008	0.0172514	0.0170503	0.0233908	0.0181631	0.031335	0.0218648	0.0232396	0.0161327	0.0234173	0.0217866	0.0180497	0.0182964	0.0268448	0.023546	0.0418795	0.0289146	0.0409564	0.0154452	0.021353	0.021834	0.0240919	0.0202245	0.0162946	0.0257613	0.0195808	0.0225699	0.0255618	0.0248604	0.0271262	0.0226712	0.0216211
104	0.0300364	0.0236571	0.0240626	0.0204911	0.0191401	0.0172104	0.0174776	0.0267633	0.0241673	0.0231867	0.0310247	0.0196222	0.0144104	0.0211817	0.0223249	0.0228677	0.0239176	0.0339043	0.0181998	0.0174826	0.0224658	0.0168696	0.030303	0.022825	0.0233647	0.0159957	0.0233087	0.022711	0.0183179	0.0201541	0.0266988	0.0251283	0.0418648	0.0288254	0.0435177	0.0163821	0.0213612	0.0228947	0.0246445	0.0202046	0.0169649	0.0257019	0.0187009	0.0242544	0.0255296	0.0237567	0.0287427	0.0222753	0.0228176
106	0.0293961	0.0248053	0.0218299	0.0232361	0.0187885	0.0158607	0.0185789	0.0266582	0.0256787	0.0257884	0.0291907	0.0198326	0.0143547	0.0202911	0.0208988	0.0254017	0.0215394	0.0337764	0.0220808	0.0183433	0.0232142	0.0174272	0.0325837	0.0235272	0.0251926	0.0170327	0.0236395	0.0240772	0.0194963	0.0197686	0.0278311	0.0221898	0.0435229	0.0319578	0.0403831	0.01727	0.0237362	0.0246117	0.0246352	0.0217634	0.0183191	0.0257467	0.0184423	0.0240032	0.0237136	0.0252911	0.0279769	0.0236167	0.0239615
108	0.0296034	0.0249234	0.0222775	0.0234376	0.0219031	0.0185267	0.0207026	0.030866	0.0268618	0.0269149	0.0320431	0.0214314	0.0175475	0.0222922	0.0212254	0.0273231	0.0234822	0.0370081	0.0219537	0.019996	0.023312	0.0190973	0.0344604	0.0233599	0.025532	0.0180795	0.0268397	0.0251309	0.0205209	0.0225117	0.0317097	0.0242232	0.0453409	0.0344886	0.0439794	0.018077	0.0252601	0.0263303	0.0256868	0.0229084	0.0205388	0.0278588	0.0202226	0.0252484	0.0250758	0.0259477	0.0293103	0.0264003	0.0263318
110	0.0303863	0.0244842	0.0225357	0.0240652	0.0226416	0.0187095	0.0210282	0.0307937	0.027684	0.0255819	0.0317923	0.0222254	0.0190248	0.0206844	0.0222783	0.0255085	0.021682	0.0379225	0.0213233	0.0186559	0.0238459	0.0202452	0.0345011	0.0217444	0.024323	0.0177708	0.026324	0.0261052	0.0207077	0.0222359	0.0318465	0.0259842	0.0437956	0.0367996	0.0447165	0.0178529	0.0257565	0.0268814	0.0263401	0.0219295	0.0208432	0.0289064	0.0201619	0.0259096	0.0260959	0.0263505	0.0284737	0.027934	0.0263222
112	0.030873	0.027214	0.0223166	0.0239936	0.0220963	0.0218035	0.024772	0.0322813	0.0272182	0.0281292	0.0337193	0.0231242	0.019585	0.0210451	0.0231354	0.0252182	0.0223744	0.0380433	0.0189	0.0191688	0.023344	0.0205646	0.0371087	0.0217434	0.024147	0.0195717	0.0263218	0.0278137	0.0240177	0.0235955	0.0333741	0.0268032	0.0463782	0.0334634	0.0454795	0.0203749	0.0254777	0.0254369	0.0276429	0.0235429	0.0221424	0.02942	0.0212645	0.0273834	0.0298252	0.0265905	0.0296315	0.0285547	0.0270819
114	0.0308702	0.0300999	0.0222311	0.0234692	0.0224993	0.0217839	0.0235381	0.0322625	0.0263544	0.0264926	0.032075	0.0241321	0.0219792	0.0218828	0.0230136	0.0247452	0.018741	0.0362577	0.0203227	0.0190026	0.0247537	0.0221905	0.0369236	0.0212604	0.0256006	0.0219354	0.0263179	0.028284	0.0237644	0.0240622	0.0321739	0.027862	0.044688	0.0350752	0.0446338	0.0185361	0.0257916	0.0251462	0.0292681	0.0248454	0.0216658	0.030811	0.0231028	0.0258367	0.0295293	0.0279399	0.0287985	0.0284306	0.0264842
116	0.0351963	0.0301765	0.0241283	0.0212964	0.0248414	0.0238451	0.0243947	0.032988	0.0268549	0.0260508	0.03403	0.0252712	0.0226668	0.0223856	0.0245962	0.020988	0.0193172	0.0364841	0.0194016	0.0173235	0.0258364	0.0229157	0.0385489	0.0209688	0.0233921	0.0205404	0.0265753	0.0269645	0.0237684	0.025417	0.0321406	0.0288361	0.0427588	0.0368681	0.0474634	0.0177984	0.0272218	0.0256713	0.0280838	0.0223591	0.0219814	0.0306153	0.0236864	0.0256396	0.0314256	0.0274044	0.0291924	0.0278371	0.0254541
118	0.0309182	0.0342779	0.0237637	0.0237819	0.023968	0.0227596	0.0243482	0.0305489	0.028734	0.0258083	0.0343001	0.0258561	0.0218267	0.0227858	0.0240126	0.0232291	0.0196017	0.0341727	0.0230095	0.0200384	0.0278078	0.0228104	0.0372861	0.0218638	0.0240396	0.0199804	0.027402	0.0277774	0.0235448	0.0266297	0.0315311	0.0296262	0.045184	0.0374345	0.0506293	0.0180483	0.026004	0.0257256	0.0269533	0.0251809	0.0221997	0.0302102	0.0224947	0.0268991	0.0322661	0.0277198	0.0284581	0.0278727	0.026455
120	0.0312644	0.0361433	0.0241558	0.0253872	0.0259426	0.0219076	0.0268881	0.030559	0.0293083	0.025499	0.0341585	0.0235647	0.0224078	0.0246879	0.0229974	0.0237468	0.0215004	0.0349741	0.0249303	0.0197211	0.0269314	0.0216246	0.0343118	0.0220985	0.0239672	0.0215663	0.0304932	0.0272207	0.0232107	0.0258364	0.0322012	0.0314763	0.0452388	0.0362058	0.0491123	0.0175316	0.0252203	0.0255522	0.0258316	0.0277204	0.0213969	0.0315146	0.0230773	0.0274368	0.033305	0.0274594	0.0299133	0.0280598	0.0257256
122	0.0344894	0.0326951	0.0234442	0.0284506	0.0265761	0.0197572	0.0259451	0.0315342	0.0301965	0.0236238	0.0316066	0.0233002	0.0222252	0.022571	0.0235711	0.0231475	0.0211406	0.0329842	0.0282797	0.02059	0.0278102	0.0207686	0.0341003	0.0224723	0.0252753	0.0202256	0.0321403	0.0262508	0.0239198	0.0253005	0.0323648	0.03004	0.0423252	0.0398088	0.0520694	0.0182141	0.026545	0.0252345	0.0262714	0.0256963	0.0222132	0.0340098	0.0214761	0.0279063	0.0317123	0.0281433	0.0300336	0.0298357	0.0253377
124	0.0329743	0.0308526	0.0245497	0.0330485	0.0248535	0.0212743	0.0253708	0.0330705	0.0303497	0.0242235	0.0329475	0.0246639	0.020627	0.0223726	0.0260389	0.0272303	0.0243531	0.0343106	0.0272001	0.0208551	0.0290842	0.0209514	0.0350987	0.0239388	0.0251954	0.0195251	0.0323469	0.0284751	0.0247532	0.0241968	0.0344461	0.0299064	0.0462186	0.040614	0.0531821	0.0174374	0.0274661	0.0253342	0.0265168	0.0261222	0.0223539	0.0359702	0.020909	0.0296298	0.0313305	0.0279057	0.0298674	0.0322378	0.0248583
126	0.033267	0.0314016	0.0232477	0.0355051	0.0236178	0.0218142	0.0243624	0.0317761	0.0284931	0.0244301	0.0337199	0.0262383	0.0202877	0.0246401	0.0264466	0.0291199	0.026219	0.0338875	0.0270958	0.022827	0.0301103	0.0208078	0.0345603	0.0251807	0.0266701	0.0212011	0.0343324	0.0293404	0.0253836	0.0258534	0.0352124	0.0309643	0.0460998	0.04077	0.0521513	0.020862	0.0273665	0.0239971	0.0279998	0.0285785	0.0222224	0.0364483	0.0206292	0.0306966	0.0312038	0.0292376	0.0314679	0.0328411	0.0279334
128	0.0338573	0.0296321	0.0255969	0.0343527	0.0244931	0.0210174	0.0238021	0.0319301	0.0283807	0.0263582	0.0336853	0.0262181	0.0209047	0.0237461	0.0281669	0.0302187	0.0247402	0.0371662	0.0242861	0.0195252	0.0303208	0.0201771	0.0379538	0.0256273	0.0275962	0.0224381	0.0336361	0.0298244	0.0247958	0.0257036	0.0340243	0.0302606	0.0450176	0.039972	0.0508428	0.021622	0.0275183	0.0238417	0.0289688	0.029188	0.0236117	0.0356854	0.0234631	0.030823	0.0296353	0.0286472	0.0313251	0.0336124	0.0300319
130	0.035624	0.0302863	0.0268815	0.0320174	0.0234979	0.0215812	0.0241169	0.0344365	0.0278093	0.027336	0.0328275	0.0277882	0.0203921	0.0243163	0.0277255	0.0321504	0.0257221	0.0339492	0.0252495	0.0203486	0.0298223	0.021305	0.0403908	0.0246902	0.0285338	0.0218145	0.0336168	0.0316508	0.0263446	0.0264152	0.0348398	0.0282575	0.0467421	0.0392959	0.0496471	0.0210551	0.0292585	0.0248402	0.0304389	0.0289642	0.024151	0.0360096	0.0227665	0.0313096	0.0294946	0.0296546	0.0308462	0.0353055	0.032542
132	0.0357265	0.0305018	0.0294718	0.0300744	0.0237679	0.0214812	0.0254614	0.0325687	0.0277126	0.0273675	0.0326739	0.0276676	0.0218969	0.0249235	0.0306029	0.0346807	0.0253707	0.0345166	0.0252221	0.0206747	0.0297897	0.0223619	0.0417555	0.0241328	0.0282001	0.0220462	0.0346007	0.0321216	0.0250372	0.0286879	0.034237	0.0288488	0.0482665	0.038092	0.0492372	0.0188804	0.0282937	0.0253243	0.0321008	0.0321014	0.0225889	0.0341156	0.0222624	0.0321381	0.0305594	0.0301944	0.0313178	0.0357755	0.0350024
134	0.0347211	0.0317904	0.0284046	0.0259567	0.0281557	0.0207421	0.0269083	0.0316476	0.0293632	0.0281957	0.0330954	0.0280009	0.0235004	0.0249361	0.0327084	0.0335909	0.026014	0.0354661	0.0264844	0.0235512	0.0291035	0.0233607	0.0446718	0.023407	0.0277714	0.0218224	0.0366342	0.030375	0.0245071	0.0294963	0.0330846	0.0321128	0.0469775	0.0395222	0.0509355	0.0217941	0.0293435	0.0265754	0.0329694	0.0319731	0.0243812	0.0322395	0.0242451	0.0322439	0.0329653	0.0320497	0.0326152	0.0356366	0.0367953
136	0.035914	0.0344969	0.0306223	0.0252803	0.0298641	0.0214984	0.0265465	0.0308119	0.0316135	0.0280333	0.0316937	0.0259357	0.0243473	0.0255438	0.0319051	0.0347684	0.0247371	0.039358	0.028908	0.0250868	0.0293838	0.0240777	0.0440384	0.0233213	0.0274639	0.021557	0.0363425	0.0301946	0.0257045	0.0279831	0.0313618	0.0316368	0.0487644	0.0397827	0.0496673	0.0193241	0.029479	0.0266165	0.0324863	0.0332682	0.0235458	0.0335619	0.0256806	0.0323664	0.0325259	0.0324344	0.03141	0.0364713	0.0363106
138	0.0380138	0.0331647	0.0293858	0.0248297	0.0309111	0.0228678	0.0277497	0.0302469	0.0303478	0.0258357	0.030572	0.0267136	0.0248603	0.0245664	0.0332205	0.0335543	0.0261571	0.0377969	0.0312089	0.0278051	0.0305597	0.0246897	0.0423251	0.0242291	0.0277374	0.0223386	0.0365986	0.0304762	0.0276907	0.0279333	0.0321677	0.0315159	0.048516	0.0398063	0.0487385	0.0199122	0.0299513	0.0255393	0.0335474	0.0317398	0.0218043	0.0347722	0.0246814	0.03105	0.0364623	0.0333437	0.0310981	0.0365246	0.0360043
140	0.0370859	0.0337901	0.0285945	0.0253097	0.0315102	0.0246936	0.0252318	0.0287149	0.0313047	0.025618	0.0300329	0.0267705	0.0233537	0.0255129	0.0352765	0.0307382	0.0276896	0.0423068	0.0319039	0.0302893	0.0333018	0.0247563	0.0419307	0.0260855	0.0288014	0.021805	0.0353418	0.030764	0.0273902	0.0280745	0.0301589	0.034132	0.0485867	0.0403068	0.0522193	0.0213583	0.028772	0.0245683	0.0343145	0.0328369	0.0238924	0.0338875	0.0258106	0.031661	0.0383196	0.0329258	0.0309968	0.0360026	0.0350788
142	0.036889	0.0378734	0.0283544	0.0289754	0.0333556	0.0269332	0.0254183	0.0301853	0.0311621	0.0267873	0.0321499	0.0283835	0.0252069	0.0266084	0.0351214	0.0317128	0.0286638	0.0429749	0.0325698	0.0316493	0.0343639	0.0244717	0.042511	0.0267331	0.0299405	0.0232092	0.0357752	0.0338892	0.0290432	0.0285076	0.0300447	0.036854	0.048009	0.0409482	0.0494656	0.0242836	0.0295546	0.0250552	0.0336601	0.0327864	0.0241168	0.0375465	0.0276551	0.0307362	0.0395682	0.0349611	0.032267	0.0348649	0.0356967
144	0.0375747	0.0389482	0.0298823	0.0309	0.0306204	0.0284149	0.0256554	0.032183	0.0329091	0.0278117	0.0324845	0.0273973	0.0256713	0.0279674	0.0345806	0.0302614	0.0311587	0.0442767	0.0342303	0.0300361	0.037382	0.0236844	0.0419043	0.0281423	0.0314755	0.024409	0.0360924	0.0337368	0.030163	0.0288719	0.031798	0.0373423	0.0507454	0.0404518	0.049607	0.0231712	0.029153	0.0270261	0.0334978	0.033845	0.0232707	0.0389596	0.029624	0.0320805	0.0401571	0.0371722	0.0344619	0.036514	0.035309
146	0.0403125	0.0401671	0.0310293	0.0317288	0.0289781	0.0286617	0.0282444	0.0356401	0.0328862	0.02687	0.0327665	0.0275408	0.0265865	0.0270875	0.0380581	0.0324465	0.0336995	0.0417926	0.0351026	0.0284653	0.0390173	0.023489	0.0434179	0.0267459	0.0329816	0.0251316	0.033595	0.0352579	0.0286499	0.0294379	0.0321111	0.0385425	0.0517695	0.040893	0.050887	0.0255246	0.0289414	0.0289131	0.0337443	0.0333951	0.025452	0.0375889	0.0283015	0.0334732	0.0422758	0.0376803	0.035125	0.0368637	0.0356031
148	0.0402781	0.0433146	0.0302899	0.0324407	0.0299491	0.0280765	0.0283966	0.0387301	0.0332251	0.0277208	0.0346573	0.0277893	0.0247589	0.0291518	0.0370865	0.0348002	0.0357899	0.0400849	0.0357995	0.0272795	0.0392328	0.0240259	0.0449765	0.0260969	0.0333794	0.0251536	0.0341467	0.0350944	0.0270409	0.0292353	0.0339561	0.0399446	0.0510441	0.0438114	0.0508617	0.0253312	0.0277638	0.0304207	0.034509	0.0341719	0.0263525	0.0371253	0.0290193	0.0347925	0.0411115	0.03968	0.0355738	0.0368338	0.0357971
150	0.0383005	0.0436361	0.0317921	0.0335392	0.0306962	0.0295608	0.0302358	0.041445	0.0329325	0.0290974	0.0382693	0.0304989	0.0258327	0.0308561	0.0381166	0.039048	0.0336634	0.0375188	0.0359602	0.0276437	0.0401135	0.0243478	0.0469672	0.0273855	0.0331133	0.0265914	0.033076	0.0371242	0.0266678	0.0323597	0.0356968	0.0396094	0.051911	0.044021	0.0521059	0.0273616	0.0316911	0.0333339	0.0352938	0.0345261	0.0257494	0.0378071	0.0299327	0.037401	0.040795	0.0416867	0.0357002	0.0381078	0.0382345
152	0.0376307	0.045526	0.0334517	0.0329531	0.0319539	0.0288894	0.0305652	0.0415452	0.0357812	0.0288392	0.0381455	0.029959	0.0250431	0.0327959	0.0373709	0.0385903	0.0357259	0.0386695	0.0368686	0.030707	0.0408274	0.0257409	0.0466289	0.0282386	0.0320426	0.0257671	0.0331185	0.0343951	0.0266714	0.0318968	0.0358863	0.040089	0.0537662	0.0452852	0.0542538	0.0270388	0.0335524	0.0334074	0.036468	0.0334392	0.0282704	0.036397	0.0295906	0.038226	0.0395447	0.039524	0.0357133	0.0376619	0.0379796
154	0.0414804	0.0462835	0.0364214	0.0319811	0.0341134	0.0271547	0.0299884	0.0420046	0.0343746	0.0287575	0.0374474	0.0314508	0.025487	0.0331202	0.0385004	0.0397694	0.0316772	0.0402697	0.0373439	0.0307331	0.0403336	0.0269568	0.0476609	0.0286338	0.0328009	0.0273352	0.0336737	0.0372209	0.0275092	0.0333155	0.0353194	0.0380946	0.0538923	0.0453607	0.0574994	0.0294232	0.0329299	0.032785	0.0351981	0.034852	0.0286601	0.036783	0.0292518	0.0396053	0.0392538	0.038096	0.0338324	0.035831	0.0388726
156	0.0408335	0.0471212	0.037873	0.0317085	0.0370481	0.029065	0.0290472	0.0419229	0.0325704	0.0307502	0.0401563	0.0329642	0.0264228	0.0348261	0.0352486	0.0387804	0.0304147	0.0412634	0.0339945	0.0314272	0.0420004	0.0271765	0.0482405	0.0304845	0.0338646	0.0285214	0.0365972	0.0374805	0.0293982	0.0337661	0.0352729	0.0400515	0.0537521	0.0460129	0.0601572	0.0296505	0.0338525	0.033729	0.0368012	0.0382202	0.0277753	0.0377536	0.0310643	0.0388063	0.0389074	0.040299	0.033052	0.0366219	0.0394033
158	0.0416053	0.0479304	0.0403139	0.0341625	0.0378492	0.0300915	0.030222	0.0423061	0.0332117	0.0338643	0.0404265	0.0343772	0.0280913	0.0357488	0.0399967	0.039232	0.027852	0.046081	0.0341743	0.034368	0.0422889	0.0284814	0.0482955	0.032668	0.0340592	0.0290688	0.038113	0.0397163	0.030791	0.0344967	0.0342275	0.0401245	0.0576479	0.0449848	0.0647793	0.0303326	0.0355629	0.0354667	0.0374642	0.0384584	0.0285459	0.0368109	0.0322895	0.0393793	0.0389208	0.0388557	0.0333469	0.0385203	0.0395372
160	0.0430038	0.0472279	0.037944	0.0337591	0.0402641	0.0293477	0.0303134	0.0423501	0.0353183	0.0348412	0.0396774	0.0349177	0.0321362	0.0340973	0.0418205	0.0401111	0.0261737	0.0481758	0.0362098	0.0349665	0.041799	0.0320957	0.0490334	0.0316919	0.0351907	0.0299344	0.0409626	0.0373534	0.0328987	0.0344832	0.0344031	0.0403961	0.0587813	0.0478532	0.063454	0.0314281	0.0346749	0.035427	0.0377851	0.0391901	0.0297819	0.0359621	0.032811	0.0378051	0.0397059	0.0376813	0.0333364	0.0377769	0.038086
162	0.0426164	0.0482408	0.0372593	0.0324673	0.0418446	0.030589	0.028917	0.0442339	0.0335358	0.0365076	0.0389746	0.0376922	0.0326837	0.0320322	0.041931	0.0401711	0.0233177	0.0495762	0.0372117	0.031786	0.041433	0.0327202	0.0486737	0.0307922	0.0370813	0.0317951	0.0414419	0.039309	0.0338535	0.0346339	0.0369985	0.0373826	0.0591957	0.0488238	0.0654544	0.0316436	0.0322638	0.0364495	0.0392011	0.0412606	0.0265148	0.0352171	0.0322874	0.0382182	0.040951	0.0396135	0.0344049	0.038247	0.0372177
164	0.0444423	0.0494817	0.035782	0.0341454	0.0419632	0.0322214	0.0295995	0.0443113	0.0370152	0.0389358	0.0407624	0.0384459	0.0344053	0.0330318	0.0402855	0.0428398	0.0252676	0.0460827	0.038119	0.0312292	0.0433913	0.0325546	0.0483859	0.0306961	0.036603	0.0339418	0.0411512	0.037972	0.0332157	0.0351871	0.0384105	0.0390427	0.0567184	0.0490466	0.0635642	0.0333979	0.0308668	0.0367367	0.0404427	0.0423522	0.0281995	0.0340228	0.0314119	0.0379339	0.0430825	0.0417853	0.0356673	0.03982	0.0378223
166	0.0422942	0.0510522	0.0335676	0.0350707	0.0408647	0.0316693	0.0306971	0.0431838	0.0387402	0.0384085	0.0405485	0.0388325	0.0374258	0.0332279	0.0434413	0.0426702	0.0265111	0.0451213	0.0425709	0.0310643	0.0430468	0.0341179	0.0488375	0.0317733	0.0360319	0.0326609	0.0414529	0.0386261	0.0324225	0.0359481	0.0395972	0.0386447	0.0551445	0.0497164	0.0634011	0.0353714	0.0322686	0.0360516	0.0404922	0.0395648	0.028153	0.0359748	0.0306073	0.0405315	0.0451015	0.0414896	0.0364485	0.0396515	0.036675
168	0.0451275	0.0509166	0.0337569	0.0348109	0.0422779	0.0328131	0.0311559	0.0428476	0.0395777	0.0366376	0.040663	0.0393747	0.0394981	0.0333252	0.0421206	0.0428859	0.0268525	0.0428576	0.0444287	0.0329157	0.0455689	0.0354456	0.0514511	0.0318552	0.0378159	0.0332663	0.0432365	0.0386117	0.0337934	0.0360937	0.0410372	0.037803	0.052595	0.0490732	0.063381	0.0372014	0.0330644	0.0377902	0.038763	0.0418534	0.0284491	0.0377192	0.0314722	0.0414296	0.0476526	0.0432376	0.0383568	0.0397394	0.0376109
170	0.0445643	0.0525168	0.0342415	0.0367343	0.043521	0.0328802	0.0320676	0.0419798	0.0378742	0.0364115	0.0425586	0.0391356	0.0379048	0.0344172	0.0417373	0.0409778	0.0278786	0.0439182	0.0440076	0.0314736	0.0463875	0.03465	0.0504427	0.0332761	0.0382354	0.0337419	0.0448696	0.0392093	0.032819	0.0366175	0.0434881	0.0388071	0.0550605	0.0477123	0.0636651	0.0379248	0.0318489	0.0374474	0.0406917	0.0424965	0.0300576	0.0396128	0.0328608	0.0431823	0.0469945	0.042943	0.0407208	0.0403791	0.038768
172	0.0458581	0.0514101	0.0332262	0.0358551	0.0419636	0.0355826	0.0321841	0.0416098	0.03871	0.0363923	0.0439732	0.0379625	0.0365715	0.0356562	0.0438914	0.0418205	0.027361	0.0414326	0.0443942	0.034133	0.0484137	0.0353635	0.0507649	0.0351811	0.0375452	0.0337976	0.0471107	0.0377361	0.0322444	0.0369867	0.0430758	0.0404272	0.055031	0.0447876	0.0608578	0.0402634	0.033952	0.0377752	0.0406348	0.0449559	0.0323901	0.0412916	0.0349906	0.0435465	0.0485998	0.0445142	0.0392085	0.0436855	0.0403518
174	0.0452186	0.0499754	0.0312339	0.0369548	0.0448747	0.0377499	0.0336419	0.041504	0.0383373	0.034801	0.0446492	0.0384414	0.0346925	0.0349784	0.0454511	0.0433953	0.0294619	0.0410529	0.0417867	0.0360571	0.0502304	0.0378981	0.0525463	0.0355776	0.0379059	0.0318935	0.0503788	0.0402664	0.034393	0.036498	0.0432911	0.0420497	0.0574337	0.0451761	0.0607586	0.0414755	0.0375905	0.0388187	0.042205	0.0441723	0.0306655	0.0434873	0.0355062	0.0439289	0.0484479	0.0456832	0.0407254	0.0451374	0.042136
176	0.0464589	0.0478887	0.032484	0.0375868	0.0480271	0.0373665	0.0335611	0.0432341	0.037372	0.0354709	0.0435652	0.0395097	0.0335847	0.0336451	0.0464923	0.0437782	0.030769	0.0425263	0.0414098	0.0386799	0.0495955	0.0391792	0.0512205	0.0347687	0.0380817	0.0343206	0.0525416	0.0409858	0.0371641	0.0391691	0.0443798	0.0436697	0.0599867	0.0470561	0.060547	0.0408795	0.0355937	0.0395485	0.0442947	0.0460099	0.0336453	0.0430585	0.0383738	0.04285	0.0486417	0.0451347	0.0405723	0.0456415	0.0420396
178	0.048399	0.0475867	0.031564	0.03849	0.0480256	0.0376397	0.0347462	0.0444155	0.0402247	0.0363176	0.0426544	0.0391956	0.0334153	0.0348253	0.0452984	0.047047	0.0347504	0.0423427	0.0386667	0.036484	0.0495818	0.0381966	0.0500409	0.0336513	0.0371753	0.0339014	0.0527837	0.0406124	0.0381815	0.0408015	0.0442587	0.0452696	0.0625396	0.0506136	0.062639	0.0406158	0.0357139	0.0375889	0.04672	0.0460303	0.0344055	0.0454708	0.0373566	0.0437992	0.0485441	0.046496	0.0411324	0.0457518	0.0426133
180	0.0470359	0.0489537	0.0325434	0.0367575	0.0455316	0.037768	0.0349868	0.0460989	0.041515	0.0374979	0.0429835	0.0384541	0.0338346	0.0351662	0.046442	0.0523813	0.0367194	0.0414928	0.0355863	0.0357318	0.0514239	0.0405423	0.0538166	0.0337723	0.0365267	0.0333828	0.0534099	0.0433468	0.0392188	0.0399346	0.0431156	0.0447053	0.061037	0.0510598	0.0669335	0.041086	0.0346141	0.0386328	0.04919	0.0469944	0.03299	0.0470243	0.0372407	0.0439973	0.0530122	0.0484245	0.0427276	0.0468958	0.0449079
182	0.0479258	0.0503042	0.034287	0.0377347	0.0485379	0.0372512	0.0380211	0.0461423	0.0447486	0.0398756	0.0431652	0.0391166	0.035372	0.0356345	0.0467153	0.0520411	0.0401818	0.0444628	0.0376196	0.0340152	0.0488711	0.0426358	0.054561	0.0341662	0.0368763	0.0346355	0.0520487	0.0437587	0.04072	0.0422419	0.0455954	0.0465536	0.0622332	0.0560586	0.0688391	0.0420017	0.0355981	0.0404586	0.0496262	0.0464247	0.0333199	0.0476115	0.037759	0.0457972	0.0547269	0.0499706	0.0451974	0.0453261	0.0433331
184	0.0493053	0.0529231	0.0374571	0.0391908	0.0495498	0.0356505	0.0393218	0.0465332	0.0453991	0.0419272	0.0428574	0.0389002	0.0366729	0.0367138	0.0459962	0.053267	0.0419072	0.0492821	0.0407174	0.0353795	0.0456122	0.0432435	0.055567	0.0352903	0.0367999	0.0362131	0.0504565	0.0424034	0.0416395	0.0449539	0.0464104	0.0447949	0.0647241	0.0554977	0.0701096	0.0407157	0.0352423	0.0428244	0.0513726	0.049786	0.0354931	0.0467161	0.0391485	0.0480756	0.0550696	0.0507681	0.0446407	0.0475817	0.0446409
186	0.0491321	0.0540365	0.038361	0.0398354	0.0489964	0.0360791	0.0402485	0.0459867	0.0460729	0.0418115	0.0457024	0.0406778	0.0367743	0.0393463	0.0473273	0.0554859	0.0431115	0.0502425	0.0415615	0.0374453	0.0481614	0.0441467	0.0582324	0.0362663	0.0383359	0.0361483	0.0524483	0.0429753	0.041358	0.0440945	0.0473806	0.0434911	0.0671575	0.0556877	0.0718084	0.0427802	0.0361969	0.0456453	0.0515281	0.0522323	0.0348189	0.0471039	0.0388976	0.0478997	0.0561784	0.0539805	0.0471539	0.0485344	0.0459281
188	0.051778	0.0520084	0.0402526	0.0402264	0.0497383	0.0377082	0.038733	0.0459316	0.0443443	0.0410494	0.0479429	0.0391335	0.0373414	0.0382482	0.0462192	0.0498949	0.0420663	0.0510188	0.0443078	0.0397363	0.0492055	0.0462881	0.0582006	0.0385653	0.0380487	0.0351518	0.0520101	0.042093	0.0414866	0.0440417	0.0467929	0.0435232	0.0650505	0.0515695	0.0663126	0.0434962	0.0363019	0.0465701	0.0522547	0.0515027	0.0352477	0.0465898	0.041191	0.0478214	0.0553097	0.0532897	0.0497812	0.0482091	0.0471843
190	0.0521485	0.0519947	0.043625	0.0434078	0.0525446	0.0396206	0.0387725	0.0453135	0.0464943	0.0424923	0.0466965	0.0399144	0.0370611	0.0388263	0.0446187	0.045562	0.0423822	0.0531017	0.0456412	0.042834	0.0478223	0.0444548	0.054273	0.0388638	0.0392721	0.035791	0.0535285	0.0402692	0.0438551	0.044436	0.0492435	0.0452677	0.0666721	0.054101	0.0651535	0.042381	0.0365261	0.0476518	0.0498486	0.0526758	0.037336	0.0447363	0.0420416	0.0479243	0.0520494	0.0552125	0.0478146	0.0471645	0.0461457
192	0.0483201	0.0518795	0.0428033	0.0461704	0.0521582	0.0402945	0.0387919	0.0457992	0.0421192	0.0403675	0.048688	0.0405109	0.0360953	0.0393757	0.0440113	0.04638	0.0434867	0.0506211	0.0441887	0.0434237	0.0512732	0.0440749	0.0549104	0.0407673	0.0398959	0.0371674	0.0544359	0.0437747	0.0459783	0.0437346	0.0493043	0.0451176	0.0675251	0.0531301	0.0652147	0.0465665	0.0352685	0.0474295	0.0502289	0.0528902	0.0379077	0.0447971	0.044496	0.0466545	0.0515768	0.053789	0.0481916	0.0492512	0.0465558
194	0.0511054	0.0500736	0.0410871	0.0465509	0.0518232	0.0436873	0.040374	0.0474885	0.0431719	0.0412656	0.0510389	0.0432966	0.0391864	0.0426215	0.0480715	0.0456209	0.0424374	0.0521695	0.0464503	0.0449113	0.0534407	0.0443716	0.0550133	0.041762	0.0412557	0.0363109	0.0575959	0.0462189	0.0450678	0.044137	0.0516115	0.0482909	0.0656035	0.0585912	0.0679828	0.0494333	0.0380908	0.0469355	0.0513924	0.0521216	0.0388107	0.0472222	0.0444981	0.0448942	0.0549281	0.0556118	0.0525262	0.0480997	0.0452633
196	0.0521118	0.0516165	0.0404122	0.0468884	0.055568	0.0454733	0.042354	0.0474768	0.0455593	0.0434461	0.0522054	0.0443391	0.0403457	0.0424859	0.0456186	0.0461437	0.0428529	0.0516581	0.04669	0.0457626	0.0524903	0.0445175	0.0562647	0.0432702	0.0412229	0.0370509	0.0558827	0.0471452	0.0463282	0.045825	0.0528015	0.0494042	0.0648427	0.0575043	0.0679838	0.0483271	0.0405785	0.0453281	0.0523434	0.0534239	0.0385823	0.0503321	0.0436223	0.0467412	0.0539081	0.0538857	0.0539559	0.0476749	0.047313
198	0.0569792	0.0569874	0.0400376	0.0480331	0.0575923	0.0463762	0.0448288	0.0490528	0.0466049	0.0453991	0.0542839	0.0481516	0.0413633	0.0443167	0.0467934	0.0510072	0.0440995	0.054462	0.0472104	0.0447718	0.0522325	0.0464544	0.0589458	0.0431935	0.0429983	0.0397068	0.0566616	0.0477794	0.0472573	0.0456705	0.0548158	0.052581	0.0701271	0.0596517	0.0723044	0.0513281	0.0423314	0.0481191	0.0548172	0.0557385	0.0386821	0.0496329	0.0417167	0.0474933	0.056564	0.0546233	0.052375	0.0487177	0.0452553
200	0.0550397	0.0588293	0.0384528	0.0463187	0.0590288	0.0471247	0.0482539	0.0500484	0.0455558	0.0453568	0.0563514	0.0487588	0.0430888	0.0444347	0.0477947	0.0495226	0.0452018	0.0551672	0.0497058	0.0443447	0.052621	0.0484072	0.0624089	0.045017	0.042599	0.0422486	0.056117	0.0483396	0.04502	0.0496579	0.0535933	0.0518004	0.0712228	0.0580186	0.0724564	0.0546106	0.0457454	0.0483797	0.0556533	0.0558007	0.0369348	0.0527988	0.0415564	0.0478553	0.0584624	0.0516452	0.0542316	0.0501984	0.0452161
202	0.0544852	0.0603184	0.0375458	0.0459964	0.0614187	0.0481801	0.048903	0.0519373	0.0488212	0.0484658	0.0570126	0.0510356	0.0475645	0.0438333	0.0477195	0.0535323	0.043935	0.0564613	0.0524397	0.0470196	0.0550397	0.0501797	0.064831	0.0435673	0.0451905	0.0403689	0.0580904	0.0477922	0.0433948	0.0484485	0.0530581	0.0516882	0.0726892	0.0568873	0.074315	0.0516788	0.048778	0.0483434	0.0580552	0.0547064	0.0374852	0.0532335	0.0399183	0.0504697	0.059719	0.0529062	0.0531478	0.0503748	0.0474846
204	0.0551037	0.0655042	0.0386919	0.0475082	0.0643371	0.0475681	0.0466278	0.052614	0.0480159	0.0483952	0.0568932	0.048947	0.0453351	0.0414923	0.0486183	0.0534309	0.0431824	0.0529422	0.0505768	0.0483935	0.057671	0.0516901	0.0654217	0.0459062	0.0456459	0.04028	0.0559642	0.0483498	0.0445402	0.0482292	0.0513692	0.0528296	0.0739127	0.0530402	0.0742189	0.0519194	0.0477923	0.0490286	0.0583959	0.0560336	0.0365855	0.051728	0.0415265	0.0531311	0.058472	0.0498779	0.0501529	0.0525924	0.047304
206	0.0564921	0.0658044	0.0380787	0.0480026	0.0626775	0.0488194	0.0464977	0.0544689	0.0489393	0.0491987	0.05747	0.0491435	0.0443342	0.0429277	0.0504215	0.0531679	0.0433398	0.050645	0.0509819	0.0475791	0.056484	0.0555407	0.0660189	0.0457488	0.0448508	0.0400641	0.0557154	0.049138	0.0444017	0.0489794	0.0506469	0.0533737	0.0757843	0.0510719	0.0736362	0.0514359	0.0477909	0.0489862	0.057825	0.054927	0.038537	0.050074	0.0447109	0.052712	0.0589023	0.0510317	0.0484235	0.0546015	0.0463891
208	0.0591158	0.065252	0.0371321	0.0492962	0.063595	0.0496726	0.0488016	0.0536911	0.0512195	0.0501305	0.0562924	0.0494903	0.0456744	0.0429082	0.0537288	0.0522412	0.0397514	0.0507271	0.0537586	0.0498357	0.0596428	0.0568793	0.0676357	0.0470046	0.0455234	0.039499	0.0554064	0.0485445	0.044612	0.0506674	0.0514887	0.0525348	0.07611	0.0500004	0.0729145	0.0534046	0.0493918	0.0497103	0.0583313	0.054597	0.0387309	0.0515471	0.0468311	0.0523627	0.0576136	0.0528434	0.0483913	0.0545295	0.048292
210	0.0545069	0.0666774	0.0396353	0.0525331	0.062546	0.0492033	0.0476319	0.0538163	0.0540446	0.0496058	0.0578599	0.05084	0.0462653	0.0447774	0.0540068	0.0554061	0.0387721	0.0512656	0.0541751	0.0543396	0.0622679	0.0580771	0.0685463	0.0479321	0.0469593	0.0412198	0.0576884	0.0480506	0.0502493	0.049082	0.0514589	0.0553826	0.0759765	0.0534249	0.0748105	0.0525248	0.0470473	0.0503269	0.059563	0.0558102	0.0421212	0.0494454	0.0480332	0.0529733	0.0590079	0.0560825	0.0499636	0.055406	0.0522657
212	0.0567464	0.0657409	0.0443468	0.0525914	0.0613444	0.0481503	0.0490859	0.0550107	0.0556967	0.0481724	0.0591614	0.0492178	0.0435618	0.0470583	0.057671	0.05442	0.0403556	0.0533328	0.0533387	0.0546569	0.0633731	0.0552693	0.0669943	0.0492323	0.0462248	0.0417563	0.0563947	0.0486692	0.0504829	0.0526777	0.0529373	0.0571081	0.0760633	0.0534704	0.0738485	0.052432	0.0444145	0.0493017	0.0619195	0.0570213	0.0417508	0.0497778	0.0483082	0.0515889	0.0590206	0.054909	0.0514305	0.0555162	0.0522447
214	0.0593289	0.0652472	0.0453687	0.0509782	0.0595785	0.0477284	0.0502768	0.0553532	0.0554103	0.0478163	0.0607631	0.0520593	0.0416671	0.0474223	0.0535188	0.0534664	0.0391719	0.0553925	0.0542238	0.0541928	0.0610468	0.0565057	0.0676063	0.0485596	0.0470946	0.0439682	0.0577118	0.0481106	0.0511634	0.0534778	0.0546235	0.0568738	0.077546	0.0539394	0.0723421	0.0513301	0.0437133	0.0492799	0.0610575	0.0567716	0.0430561	0.0512507	0.0479795	0.0497943	0.058829	0.0573011	0.0513396	0.0529687	0.0536017
216	0.0574367	0.0643155	0.0458732	0.0505673	0.0618365	0.0461078	0.0499483	0.0577555	0.0554512	0.0493939	0.0629382	0.0526233	0.0423265	0.0473975	0.0510887	0.0515964	0.0380277	0.0612417	0.0587702	0.0560867	0.0638572	0.0547347	0.0683374	0.0486447	0.0476458	0.0456661	0.0597978	0.0462292	0.0506084	0.0533968	0.0567847	0.0568429	0.07874	0.0571536	0.0726697	0.0536565	0.0433841	0.0512971	0.0629467	0.0564673	0.0421858	0.0512051	0.0481544	0.0512477	0.0607934	0.057815	0.0532866	0.0514089	0.0550148
218	0.0585786	0.0658478	0.0480955	0.0517651	0.0609155	0.0455907	0.0479134	0.0592273	0.0539345	0.047303	0.066402	0.0508783	0.0446664	0.0478567	0.0531886	0.0527415	0.0402259	0.0594476	0.0595415	0.054991	0.0620496	0.0535093	0.066522	0.0494329	0.0467014	0.0462426	0.0605461	0.0481511	0.0513093	0.0547763	0.0594415	0.060342	0.0790693	0.0612955	0.075555	0.0540383	0.0441772	0.0505193	0.0624868	0.0577194	0.0424677	0.0519577	0.05043	0.0542519	0.0628666	0.0587812	0.0550183	0.0516509	0.0542235
220	0.0588769	0.0637487	0.0483722	0.0512463	0.0630245	0.0469279	0.0482275	0.0589756	0.0538432	0.049842	0.0658771	0.0518846	0.0462819	0.0507785	0.056315	0.0539274	0.0416865	0.0567793	0.0612063	0.0543018	0.0629704	0.0521839	0.0689171	0.0511147	0.0477655	0.0451441	0.0604138	0.0511334	0.0490227	0.0556092	0.0619572	0.059799	0.080228	0.0583374	0.0735063	0.0558089	0.0465599	0.051647	0.0647342	0.0580712	0.0411437	0.0535717	0.0515749	0.0542664	0.0642588	0.0597181	0.0535126	0.0510389	0.0522335
222	0.060502	0.0638282	0.0463542	0.0531852	0.0653046	0.0489526	0.047916	0.0583109	0.0530062	0.0531467	0.066128	0.0520237	0.0483566	0.0528597	0.0562388	0.053242	0.041817	0.0573455	0.0640024	0.0549656	0.0625759	0.0558902	0.0702524	0.0529661	0.0479681	0.0467209	0.0645383	0.0516821	0.0497156	0.0539778	0.0609684	0.0591016	0.0809159	0.0598399	0.076203	0.0589527	0.0489491	0.0547404	0.0623311	0.0598427	0.0445826	0.05532	0.0534188	0.0567551	0.0636888	0.0609906	0.0539546	0.0514504	0.054538
224	0.0626706	0.062817	0.0471714	0.0525999	0.0686748	0.0519717	0.0487609	0.0600446	0.0559548	0.0586698	0.0694284	0.0510047	0.0534097	0.0557155	0.0586789	0.0581893	0.0442319	0.0550882	0.067164	0.0562245	0.0658303	0.0553184	0.0706182	0.052428	0.0483366	0.0466757	0.064987	0.0528298	0.0511703	0.0566571	0.0595639	0.0592151	0.0830667	0.0614598	0.079232	0.0643342	0.0503558	0.0542112	0.0651505	0.0610156	0.0457909	0.0578183	0.0535655	0.0581042	0.0655536	0.0615508	0.0550122	0.0517295	0.0556643
226	0.0627834	0.0638841	0.048108	0.0534652	0.0678259	0.0538099	0.0504306	0.0584264	0.0563831	0.0599693	0.0678729	0.0507215	0.0562934	0.0583362	0.0636864	0.0615139	0.0462056	0.0546485	0.0684224	0.0546655	0.0648409	0.057215	0.0707402	0.0568116	0.0500854	0.0470766	0.06947	0.054349	0.0515751	0.0577476	0.0612642	0.0635872	0.0814487	0.0618688	0.0805455	0.067159	0.051406	0.0539207	0.0676279	0.0622216	0.0469403	0.0588465	0.0539407	0.0604499	0.0685569	0.0612447	0.0558983	0.052986	0.0574856
228	0.065003	0.0636557	0.0499257	0.0521314	0.0702339	0.0561491	0.0530085	0.0572999	0.0588344	0.0628852	0.0698508	0.0518112	0.0558192	0.0638863	0.0601509	0.0623809	0.0468891	0.057613	0.0681297	0.0560426	0.0647421	0.0605507	0.0713835	0.0580255	0.0518258	0.0489875	0.0718137	0.0577761	0.0504063	0.0569327	0.0599559	0.0635789	0.0822545	0.0610785	0.0784391	0.065092	0.0522459	0.0539641	0.070136	0.0624148	0.0486635	0.0601133	0.0538629	0.0598449	0.0706066	0.0608947	0.0556255	0.0553181	0.0587669
230	0.0648279	0.0642889	0.0500127	0.0518772	0.0717894	0.0567252	0.0544184	0.058848	0.0582667	0.0624969	0.0729076	0.0526606	0.056036	0.0646815	0.0601933	0.0629672	0.0483102	0.0567209	0.0663971	0.0557563	0.0647716	0.0606011	0.0702905	0.0576824	0.0518315	0.0502525	0.0742864	0.057797	0.0504706	0.0571975	0.0622705	0.0631202	0.0830123	0.0631535	0.0803836	0.0673187	0.053202	0.0533742	0.0703057	0.0627177	0.0514934	0.0600785	0.0552844	0.0619085	0.0722308	0.0609651	0.0570201	0.0567045	0.0572887
232	0.0636341	0.0654079	0.0498183	0.0522198	0.0708693	0.0548611	0.0548375	0.0588297	0.0567426	0.063496	0.0753078	0.0547079	0.057391	0.0632825	0.0601729	0.0661017	0.047886	0.0591776	0.0660436	0.056548	0.0630564	0.0619008	0.0720354	0.0589356	0.0521738	0.0533421	0.0741509	0.0574725	0.050851	0.0568195	0.0631583	0.0631	0.0841906	0.0641273	0.0776319	0.0655845	0.0531271	0.0531564	0.0706023	0.0644451	0.0524934	0.0590601	0.0565066	0.0627612	0.0778198	0.0640909	0.0577282	0.0549221	0.0554417
234	0.065349	0.0661876	0.0489832	0.0518142	0.0706366	0.0538307	0.0556721	0.0577737	0.0553569	0.0582826	0.0740211	0.0544459	0.0569983	0.0608535	0.0616803	0.066808	0.047741	0.0628666	0.0644318	0.0556488	0.062357	0.0638755	0.0726608	0.0589273	0.0548971	0.0537686	0.0757604	0.0553012	0.0521006	0.0553992	0.0665413	0.06366	0.0862127	0.0646592	0.0760443	0.0616762	0.0521125	0.0533038	0.070133	0.065194	0.0525557	0.0584759	0.0580731	0.0640456	0.0787488	0.0650361	0.0584891	0.0550395	0.0560902
236	0.0650904	0.0655104	0.0522832	0.0560419	0.0702155	0.0550521	0.0541125	0.0600221	0.055926	0.0570019	0.0750259	0.0568879	0.0573789	0.0591719	0.0598775	0.0662731	0.0484938	0.0613155	0.0623613	0.0606125	0.0651781	0.0655784	0.0732807	0.0555059	0.0563257	0.0563086	0.0727699	0.055175	0.0541438	0.0578607	0.0680182	0.0625586	0.0906463	0.0680319	0.0793535	0.0607061	0.0523956	0.0539633	0.0698343	0.0661821	0.0557973	0.061538	0.0570963	0.0640225	0.0811037	0.0658907	0.055568	0.0574775	0.0551204
238	0.0655283	0.0657535	0.0531109	0.053583	0.0693447	0.0555636	0.0522774	0.0634996	0.0554158	0.0580809	0.0732502	0.0559974	0.0565309	0.0580461	0.0622342	0.065208	0.0502509	0.0588866	0.0649847	0.0628224	0.0682225	0.0643201	0.0761779	0.0555588	0.057155	0.0587811	0.0757142	0.0527065	0.0562131	0.0585531	0.0696602	0.0603972	0.0908086	0.0689572	0.0786087	0.0637303	0.0508159	0.0565667	0.0691416	0.0689918	0.0570983	0.0629164	0.0598651	0.0643697	0.0823344	0.0653762	0.0565405	0.0580699	0.0582175
240	0.0684248	0.0663309	0.0529305	0.0543454	0.0684882	0.0566166	0.0523444	0.0653966	0.0555243	0.061	0.0712042	0.0550643	0.0572489	0.0552735	0.0626947	0.0664745	0.0479655	0.0641353	0.0680304	0.0623615	0.0685585	0.0665736	0.0742994	0.0561412	0.0576279	0.0579551	0.0760487	0.0527245	0.0576676	0.0595467	0.0681328	0.0618459	0.0891319	0.0700217	0.0802323	0.0642039	0.0509794	0.0571417	0.0693775	0.0701163	0.0549702	0.0656327	0.0596316	0.0649437	0.0818541	0.0654605	0.0570312	0.0603616	0.0613552
242	0.0680307	0.0690875	0.0551002	0.0537525	0.0715348	0.0581557	0.0524753	0.0668762	0.0565897	0.0594476	0.0711259	0.055741	0.0550261	0.0576647	0.0669798	0.0645994	0.0480986	0.0648698	0.0669463	0.0639964	0.071333	0.0651378	0.075869	0.0577037	0.0589954	0.0582826	0.0771264	0.0543608	0.0586543	0.0623988	0.0709332	0.0634931	0.0899809	0.0703686	0.0830869	0.0664977	0.0543838	0.060414	0.0722542	0.0707356	0.0532688	0.0687105	0.0601518	0.0664289	0.080542	0.0652122	0.0578379	0.0636855	0.0650479
244	0.0685473	0.0690877	0.0559645	0.0546325	0.0738583	0.0605313	0.0531318	0.0661069	0.0576964	0.0636142	0.07089	0.0551476	0.0544939	0.0607385	0.06697	0.0630757	0.049255	0.0681076	0.0668166	0.0653215	0.0731999	0.0643036	0.075158	0.0584964	0.0580433	0.0588193	0.0777261	0.0545096	0.058917	0.0624747	0.0699619	0.0665502	0.0910129	0.0707711	0.0851056	0.0667686	0.0600223	0.0613105	0.0721435	0.0717379	0.0538254	0.0678594	0.0602759	0.0676016	0.0821189	0.0646065	0.0576264	0.0661133	0.0650369
246	0.0704088	0.0696179	0.0561002	0.0507438	0.0784151	0.0627964	0.0575366	0.0681584	0.0583398	0.0645738	0.0710837	0.0528546	0.057727	0.0625054	0.0693382	0.0649204	0.0478707	0.0677623	0.0674257	0.0627386	0.0738562	0.0619118	0.0760736	0.0624292	0.0585567	0.0567993	0.0792637	0.05534	0.0599862	0.0612426	0.0675254	0.0652898	0.0911746	0.0680472	0.082093	0.0677961	0.0614082	0.0635536	0.0733011	0.0734771	0.052263	0.066456	0.0633631	0.0682298	0.081486	0.0651203	0.0597931	0.0673684	0.0682911
248	0.0691157	0.0710799	0.0536572	0.0542955	0.0794211	0.0620803	0.0585415	0.0665512	0.0605146	0.065853	0.0705354	0.0543769	0.0567662	0.0607406	0.0716763	0.0649687	0.0513815	0.0722755	0.0681971	0.0629802	0.0722158	0.0637188	0.0772008	0.0624783	0.0597131	0.0565395	0.0762431	0.0567047	0.0606307	0.0647779	0.0712326	0.0663424	0.0909278	0.0678349	0.0864895	0.0657239	0.0632931	0.061917	0.0756439	0.0727748	0.0532549	0.0677604	0.0606578	0.0708525	0.0849112	0.0664319	0.0581543	0.0689907	0.0674434
250	0.0707575	0.0753727	0.0569626	0.0552321	0.0849256	0.0617702	0.0598603	0.0654611	0.0629607	0.0651551	0.0723567	0.0579068	0.0597137	0.0638435	0.072721	0.0671296	0.054624	0.0714708	0.0703973	0.0655779	0.0736148	0.0694065	0.0815087	0.0623879	0.0599318	0.0600529	0.0761336	0.0588708	0.0616302	0.0670644	0.0712031	0.0701819	0.0948474	0.0683304	0.0879224	0.0623746	0.065686	0.0639184	0.0759123	0.073705	0.0554485	0.0685705	0.0607359	0.0726225	0.0875952	0.066936	0.0587375	0.0702437	0.0680556
252	0.0711597	0.0750781	0.057201	0.0568116	0.0873123	0.0645548	0.0602568	0.0664508	0.0668301	0.066118	0.0738302	0.0605056	0.0656718	0.0665659	0.0722716	0.069713	0.0573124	0.0688374	0.0751496	0.0709479	0.0751994	0.0723938	0.0828035	0.0618974	0.0625184	0.0598132	0.0752768	0.0590046	0.0626848	0.0683217	0.0695756	0.0744844	0.0955706	0.0694935	0.0898131	0.0640444	0.0653492	0.0634294	0.0754361	0.0737853	0.0582715	0.0681766	0.0625859	0.0723691	0.0863574	0.0673915	0.058594	0.0730503	0.0676417
254	0.0746616	0.075413	0.0586647	0.0580478	0.0866789	0.0658825	0.060429	0.0704244	0.0657463	0.0655064	0.0740297	0.0627829	0.0654025	0.0654796	0.0725651	0.0687188	0.0574158	0.0636571	0.0770882	0.0711734	0.0767342	0.074029	0.0834101	0.0643026	0.0632327	0.0606266	0.075661	0.0637423	0.061891	0.0682996	0.0733529	0.0741136	0.0921429	0.0703145	0.0847636	0.0640164	0.0621869	0.0665961	0.0755976	0.073912	0.0584955	0.0720594	0.062692	0.0698492	0.0860144	0.0666402	0.0569838	0.0733627	0.0688338
256	0.0760198	0.0770493	0.0574869	0.0579481	0.087132	0.0637329	0.0595574	0.0705553	0.0659751	0.0656574	0.0756604	0.0614519	0.0638701	0.0644704	0.0728992	0.0694558	0.0586478	0.0684019	0.0760835	0.0719703	0.0765905	0.0764317	0.0834099	0.063876	0.0640336	0.0614401	0.0744799	0.0633662	0.0622455	0.0680854	0.074939	0.0787378	0.0911894	0.0735188	0.085805	0.067703	0.0635723	0.0654295	0.0739228	0.0738252	0.0594356	0.072796	0.0628634	0.0706891	0.0865327	0.0684773	0.0567496	0.0717042	0.0663443
258	0.0712953	0.0800046	0.0591799	0.0581575	0.0892242	0.0639131	0.0598469	0.0713824	0.0655996	0.0664365	0.0774737	0.0647197	0.0658738	0.066437	0.0732912	0.0700898	0.056992	0.0694337	0.0758076	0.07243	0.0791685	0.0765061	0.0806072	0.0646716	0.0642088	0.0624365	0.0761561	0.0628601	0.0621707	0.066709	0.0711657	0.0785933	0.0914729	0.076085	0.0829307	0.0722663	0.0624667	0.0671337	0.0738608	0.0739426	0.0587583	0.0733043	0.0663652	0.0702867	0.084806	0.0682971	0.0574668	0.0706986	0.0670259
260	0.0736966	0.0793884	0.0587	0.0583005	0.084715	0.0623435	0.0592229	0.0733927	0.0639635	0.0673931	0.078887	0.0629641	0.0648428	0.0655876	0.0727488	0.0692546	0.0585814	0.0716142	0.0765267	0.0721685	0.0787374	0.0734762	0.0797093	0.0673308	0.0656838	0.0616908	0.0775648	0.0607678	0.0605036	0.065029	0.074215	0.0798794	0.0907462	0.0753668	0.079713	0.0756412	0.0623285	0.0686989	0.0755253	0.0739944	0.0604279	0.074004	0.0676572	0.0694223	0.0822558	0.0719755	0.055726	0.068493	0.0683462
262	0.0743688	0.0812338	0.0600856	0.0596228	0.0846691	0.0607174	0.0616488	0.0757386	0.0641699	0.0674473	0.0771095	0.0618456	0.0632465	0.0651099	0.0715887	0.0676262	0.0602077	0.0762977	0.0773337	0.0698109	0.0796187	0.0762752	0.0784439	0.0669294	0.0642055	0.0635693	0.0794798	0.0630628	0.0606938	0.0672471	0.0735941	0.0774014	0.0924993	0.0776393	0.0791325	0.0747562	0.0599459	0.0699231	0.077058	0.0757125	0.0597647	0.0759041	0.067618	0.0695369	0.0830856	0.0747907	0.0563412	0.0655212	0.066734
264	0.0765664	0.082751	0.0626442	0.0621293	0.0859717	0.0576066	0.0639413	0.0756372	0.0671955	0.0718246	0.075145	0.0617847	0.0644458	0.0700251	0.0731067	0.0713318	0.0616839	0.0812042	0.079989	0.0728915	0.078606	0.0786138	0.0813038	0.0663571	0.0661921	0.0662368	0.0809654	0.0611397	0.0621091	0.0712559	0.0723787	0.0781537	0.0928972	0.0780783	0.0864372	0.0766836	0.0618548	0.0690508	0.0791109	0.0791961	0.0611138	0.0753556	0.0695254	0.0728535	0.0829454	0.0772212	0.0584826	0.0648936	0.0686698
266	0.0787556	0.0859992	0.0658435	0.065043	0.0864788	0.0580119	0.0631281	0.0740764	0.0689485	0.0733832	0.0750154	0.0645027	0.0640637	0.0714414	0.0766796	0.0714381	0.0620351	0.0767261	0.0849515	0.0763932	0.0788461	0.0803284	0.0819896	0.0664898	0.0661821	0.067605	0.0812386	0.0630853	0.0625346	0.0739001	0.0738282	0.0774048	0.0943898	0.0764598	0.0897677	0.0736822	0.0616853	0.0736352	0.0804826	0.0814808	0.0610653	0.0768929	0.0693494	0.0720072	0.0820358	0.0774956	0.0612306	0.0668356	0.0725181
268	0.0790472	0.0840055	0.0690329	0.0667524	0.0881985	0.0576412	0.0635366	0.0771924	0.0691973	0.0711332	0.0737002	0.0649741	0.0649382	0.0734019	0.0743734	0.0739101	0.061286	0.0742103	0.0837351	0.0787398	0.0768965	0.0810521	0.084619	0.0689334	0.0678161	0.0673992	0.0804677	0.0632063	0.0637498	0.0723536	0.0749915	0.0786897	0.0942981	0.0758166	0.0925435	0.0733609	0.0616612	0.0741171	0.0792042	0.0816775	0.062373	0.0781293	0.0679619	0.0725604	0.0819864	0.0777268	0.0630643	0.0667491	0.0721598
270	0.079073	0.0818307	0.0692816	0.0688303	0.0915095	0.0615569	0.0648334	0.0798461	0.0727718	0.0684471	0.0736992	0.0676772	0.0639328	0.0751718	0.0775211	0.0745595	0.0602927	0.0720563	0.0848884	0.0804886	0.0786433	0.082942	0.086235	0.0676585	0.0701223	0.0678152	0.0773953	0.0641589	0.063388	0.0749796	0.0741972	0.0758104	0.0952642	0.0767466	0.0994591	0.0746281	0.0607581	0.0743765	0.079015	0.0825892	0.0612796	0.0809948	0.0704053	0.0738783	0.0852864	0.0778078	0.0674926	0.0679189	0.0712123
272	0.0779443	0.0792057	0.0714679	0.0681582	0.0901211	0.0634265	0.0651247	0.080052	0.0733589	0.0721206	0.0760536	0.066134	0.0620811	0.0747772	0.0767446	0.0766056	0.0603032	0.064992	0.0826268	0.0813964	0.0778249	0.0827357	0.0888285	0.0686978	0.0697908	0.0668632	0.077596	0.0649882	0.0653736	0.0746936	0.076733	0.0794862	0.0942071	0.0740662	0.0998422	0.072938	0.0627441	0.0744607	0.0809645	0.0813179	0.0614809	0.0808187	0.0708174	0.072977	0.0847242	0.0773013	0.06903	0.0697384	0.074271
274	0.0800475	0.0809511	0.0728705	0.0668041	0.0898789	0.0663522	0.0645415	0.0802072	0.0721875	0.06888	0.0793473	0.0690151	0.0629683	0.072248	0.076469	0.0779642	0.0612839	0.0625681	0.0841311	0.0818743	0.0783467	0.0836737	0.0882577	0.069508	0.0667469	0.0678656	0.0768102	0.067294	0.065573	0.0753719	0.0756149	0.0787044	0.0961007	0.0741645	0.100623	0.0737845	0.0629581	0.0763231	0.0815201	0.0791456	0.0625627	0.0809426	0.071574	0.0722772	0.0847854	0.0766683	0.0700414	0.0727489	0.0731809
276	0.0810909	0.0786838	0.0748745	0.0650041	0.0905049	0.0671742	0.0655958	0.0817121	0.0704856	0.0686706	0.0808343	0.0714048	0.0640654	0.0749391	0.0728872	0.0790235	0.064513	0.0682275	0.083272	0.0798873	0.0778609	0.0835696	0.0888072	0.0712406	0.067481	0.0720424	0.0799617	0.067813	0.0674111	0.0765336	0.0774164	0.0780753	0.0964342	0.0784893	0.0983867	0.0726662	0.0651739	0.0730119	0.0829338	0.0791908	0.0636385	0.0814949	0.0728662	0.07516	0.0884532	0.0805933	0.069344	0.0721277	0.0725553
278	0.0811608	0.0812438	0.0755082	0.0641709	0.0917349	0.0672656	0.0690964	0.0815022	0.0712857	0.073974	0.083779	0.0698407	0.0627946	0.0726786	0.0751401	0.0803658	0.064023	0.0712349	0.085573	0.0803635	0.0814526	0.0861858	0.0910432	0.0710511	0.0680854	0.0742675	0.0825803	0.0729137	0.0669403	0.0800196	0.0780612	0.0770242	0.097182	0.0805856	0.105164	0.0729366	0.0683586	0.0748873	0.0847589	0.084517	0.0660369	0.080901	0.074188	0.0759109	0.0901386	0.0820374	0.0687086	0.0759881	0.0772455
280	0.0818785	0.0844525	0.0786587	0.0623681	0.0945676	0.0674294	0.0704518	0.0802865	0.0720737	0.0779441	0.0866348	0.0695318	0.0617326	0.0711452	0.0749332	0.0808368	0.0669291	0.0725731	0.0866245	0.0800718	0.083063	0.0878893	0.0925911	0.0728048	0.0670941	0.0770115	0.0874259	0.0761146	0.06898	0.0802674	0.0819362	0.0787369	0.0961377	0.0851042	0.0997422	0.0737079	0.0694842	0.0745712	0.0831168	0.0851357	0.0676658	0.0804269	0.0723298	0.0777257	0.0890916	0.0806405	0.0682336	0.0779655	0.0796186
282	0.0849722	0.088746	0.0767101	0.0612661	0.0970452	0.0687239	0.0702525	0.0800942	0.0750094	0.0770311	0.0890238	0.0728245	0.0626167	0.0719353	0.0787279	0.0827889	0.0657744	0.0782449	0.0900602	0.0818741	0.0852793	0.0892469	0.0927928	0.0762236	0.0680229	0.0809958	0.0912337	0.0753771	0.0682955	0.0808387	0.0842913	0.0780394	0.0981384	0.0885024	0.102419	0.075565	0.0720217	0.0756179	0.0855451	0.0879173	0.0689513	0.0793684	0.0713982	0.0809	0.0951085	0.0784027	0.0672378	0.0785258	0.0814495
284	0.0852867	0.0890732	0.07408	0.0619713	0.0996899	0.0671406	0.0707947	0.0809273	0.0780773	0.0776767	0.0894407	0.0709147	0.0666615	0.0736634	0.0839446	0.0836322	0.063805	0.0810195	0.088763	0.0822415	0.0849618	0.0876962	0.09596	0.0782415	0.0702012	0.0826296	0.0949831	0.0736181	0.0665753	0.0784671	0.0856293	0.077081	0.0995528	0.0913112	0.09954	0.0786819	0.0719338	0.0736603	0.0860813	0.0912537	0.0702078	0.0802063	0.0715223	0.0833573	0.0981419	0.0778318	0.0703851	0.0768472	0.0815161
286	0.087495	0.0937582	0.0722956	0.0658231	0.101864	0.0672656	0.0739923	0.0822161	0.0832088	0.0812183	0.0908065	0.0707741	0.0641487	0.0732094	0.0891517	0.0837072	0.0638707	0.0832723	0.089656	0.0848102	0.0869934	0.089009	0.0984568	0.0777164	0.0713409	0.0790895	0.0985541	0.0756576	0.0658097	0.0797776	0.0837559	0.0797434	0.101207	0.092132	0.100831	0.081518	0.071035	0.0751764	0.0884921	0.0915346	0.0724355	0.0808718	0.0733226	0.0836201	0.0980715	0.0763847	0.0734512	0.0795988	0.0832345
288	0.0841388	0.0930283	0.0740747	0.066857	0.102559	0.0709435	0.074551	0.0827377	0.0848736	0.0782516	0.0911701	0.0728332	0.0661846	0.0747083	0.0904229	0.0834831	0.066256	0.0839034	0.0896846	0.0823967	0.084976	0.0922584	0.0990544	0.0775287	0.0712651	0.0789442	0.0993821	0.0725536	0.0667626	0.0791377	0.087778	0.0850406	0.102351	0.093049	0.097368	0.080832	0.0731964	0.0747882	0.0903336	0.0891951	0.0704719	0.081646	0.0737076	0.083871	0.100519	0.0786122	0.0723199	0.0795839	0.0823494
290	0.0898716	0.0943528	0.0717065	0.0678504	0.103795	0.0728017	0.0744135	0.0830245	0.0883442	0.0787744	0.0887837	0.0703642	0.0688294	0.0760639	0.0895869	0.0817408	0.0671438	0.0885305	0.0911362	0.0848513	0.0860777	0.0944919	0.0966595	0.0787351	0.0740173	0.0761208	0.0990265	0.0725638	0.0676397	0.0773904	0.0857677	0.0839871	0.102938	0.0914354	0.098733	0.079559	0.0744577	0.0767789	0.0950889	0.0916219	0.0707041	0.0818642	0.0727678	0.0841854	0.10051	0.0802993	0.0737696	0.0775253	0.0841248
292	0.0870945	0.0933488	0.0742119	0.0692448	0.108486	0.0734949	0.0748084	0.0852322	0.0879328	0.0782647	0.08942	0.0704619	0.0690227	0.0775183	0.0881233	0.0783666	0.0686864	0.0928488	0.0890312	0.082677	0.0879112	0.0961869	0.0988216	0.0769961	0.0750448	0.0749925	0.0994661	0.0719559	0.0678656	0.0777562	0.0833607	0.0846179	0.10406	0.0906584	0.0961763	0.082932	0.0739513	0.0799183	0.0921181	0.0932287	0.072958	0.0839917	0.0750253	0.0845292	0.0984909	0.0825772	0.0758502	0.0760886	0.0828691
294	0.0875109	0.0917361	0.0797623	0.0682969	0.108995	0.0767284	0.0750698	0.0882148	0.0881094	0.07758	0.0945627	0.0738661	0.0656919	0.0774365	0.0851116	0.0787773	0.0720091	0.094805	0.0903977	0.08467	0.0916228	0.101286	0.0989881	0.0785697	0.0781038	0.0749439	0.102328	0.0740495	0.070863	0.0780642	0.0872129	0.0901346	0.10391	0.0904161	0.0959995	0.0817909	0.074871	0.0855155	0.0936746	0.0940022	0.0728437	0.0864484	0.0769671	0.0853955	0.097288	0.085913	0.0753642	0.0796342	0.0849247
296	0.0905863	0.092972	0.079047	0.0691441	0.111969	0.0792995	0.072902	0.0919661	0.0867481	0.0775364	0.0948967	0.0738513	0.0685622	0.0766581	0.0830038	0.0816012	0.0726257	0.0945653	0.0899624	0.0838852	0.0922773	0.102598	0.100279	0.0801539	0.0763324	0.079622	0.104097	0.0741592	0.070524	0.0758701	0.0897281	0.0882539	0.102921	0.0891239	0.0963319	0.0822536	0.0757234	0.087489	0.0927026	0.0968156	0.0737211	0.0877532	0.0763191	0.0863079	0.0949554	0.0852581	0.073408	0.0795782	0.0824266
298	0.0916668	0.0954477	0.0800074	0.0702704	0.113538	0.077269	0.0749678	0.0935194	0.0880261	0.08149	0.096079	0.0743991	0.0699678	0.0784331	0.0840255	0.0854325	0.0730602	0.092776	0.0923478	0.0861067	0.095182	0.101179	0.100764	0.0832303	0.0751202	0.0804666	0.106833	0.0748069	0.0719492	0.0764244	0.0886749	0.0868505	0.103953	0.0856771	0.0971199	0.0842487	0.0732026	0.0879095	0.0934201	0.0971152	0.0780052	0.0880802	0.0767121	0.0890339	0.0951064	0.0829838	0.0768742	0.0794319	0.0821056
300	0.0905027	0.0942216	0.079977	0.0710068	0.110926	0.0765348	0.0748892	0.0949757	0.0841212	0.0803773	0.0990248	0.0768919	0.0691233	0.0805107	0.0854865	0.0909602	0.0688471	0.0871211	0.093706	0.0864421	0.0949323	0.10278	0.10292	0.0814429	0.071355	0.0851687	0.111496	0.0735712	0.0711038	0.0805874	0.0879289	0.0901714	0.106259	0.0866801	0.0982815	0.0877271	0.07558	0.0856971	0.0947335	0.0977592	0.0805063	0.0903484	0.0792579	0.0915013	0.0961153	0.0820346	0.0758824	0.0841053	0.0810053
302	0.0905788	0.0993718	0.0793107	0.0745205	0.108055	0.0770974	0.0734721	0.0932331	0.0865118	0.0827926	0.0972389	0.0764779	0.0698486	0.0827238	0.0851716	0.0950055	0.069309	0.0883397	0.0942524	0.087727	0.0961072	0.105296	0.104711	0.0844065	0.077169	0.0867432	0.110021	0.0742774	0.0723878	0.0806253	0.0898021	0.0913756	0.105889	0.0888738	0.101457	0.0880109	0.0792147	0.0846036	0.0973119	0.0950006	0.0801198	0.0952772	0.0794742	0.0944635	0.0985999	0.0825263	0.0756642	0.0886337	0.0835208
304	0.089375	0.102463	0.0796404	0.0765629	0.111701	0.0754527	0.0746302	0.0930888	0.0863478	0.0867948	0.0976547	0.0752256	0.071953	0.0815155	0.0891411	0.0944868	0.0703546	0.0900208	0.0937346	0.0883732	0.0940673	0.104381	0.103801	0.0866444	0.0766064	0.0882476	0.110269	0.0753748	0.0731781	0.0836961	0.0889782	0.090373	0.105851	0.0929717	0.104465	0.0865848	0.0810692	0.0823623	0.0981969	0.0960107	0.0823957	0.0978535	0.08192	0.0982696	0.102133	0.0842516	0.0738709	0.0885633	0.0881553
306	0.0952178	0.100967	0.0838216	0.0767004	0.11161	0.0769381	0.075748	0.0917464	0.0866932	0.0891679	0.0992849	0.0783002	0.0736668	0.0845435	0.0937695	0.0951705	0.0691368	0.0903815	0.0986276	0.09012	0.0957325	0.102871	0.105265	0.0889263	0.0789905	0.0896883	0.109616	0.0750946	0.0749467	0.0852362	0.0888758	0.0919255	0.104214	0.0947646	0.102852	0.0917926	0.0825564	0.0806334	0.0982728	0.0928449	0.0810984	0.0991865	0.0841057	0.100146	0.10462	0.0821634	0.0772521	0.0884245	0.0899759
308	0.0954661	0.102125	0.0815072	0.0781087	0.113552	0.0792218	0.0741427	0.0934971	0.0874639	0.0877302	0.103803	0.0781625	0.0743682	0.0868372	0.09548	0.0952689	0.0708996	0.0940776	0.099265	0.0899644	0.0965763	0.103548	0.106072	0.0891058	0.0835088	0.0930142	0.112216	0.0761441	0.0764838	0.0879588	0.089545	0.0969954	0.104495	0.100393	0.100814	0.0897848	0.0840306	0.0801439	0.0996589	0.0955296	0.0812191	0.101751	0.084804	0.102354	0.10333	0.0877258	0.0782936	0.0896421	0.0935319
310	0.0946697	0.104905	0.0872737	0.0806606	0.117683	0.0833008	0.0756728	0.0915642	0.0911513	0.088375	0.105936	0.0786149	0.0749915	0.0910538	0.0972615	0.0932689	0.0724952	0.100029	0.0983484	0.0905893	0.10096	0.102332	0.104869	0.0934941	0.0854625	0.0947965	0.113801	0.0794497	0.0768365	0.0863123	0.0909492	0.0978871	0.104015	0.102527	0.102599	0.0922361	0.0822204	0.0823617	0.100431	0.0981177	0.0814294	0.103411	0.0841446	0.102571	0.106075	0.0904833	0.0797842	0.087601	0.0968821
312	0.0952536	0.106231	0.0890161	0.0809528	0.122278	0.0817815	0.0771354	0.0956617	0.0911772	0.0882053	0.109572	0.0804691	0.0756705	0.0905702	0.102255	0.0941447	0.0729269	0.0935703	0.100797	0.0917491	0.100989	0.0985838	0.103959	0.094942	0.0798639	0.0962439	0.117122	0.0810167	0.0777044	0.08925	0.0924457	0.0991311	0.104649	0.100987	0.103145	0.0939672	0.0801814	0.0815382	0.101855	0.106331	0.0817019	0.10002	0.0828422	0.101227	0.105522	0.0900035	0.0823521	0.0862895	0.0971219
314	0.0973342	0.108772	0.0871004	0.0831122	0.121923	0.0828684	0.0781431	0.099082	0.0940397	0.0904722	0.105959	0.0782702	0.0773142	0.0948561	0.100553	0.0955197	0.0713774	0.0917064	0.103334	0.0931898	0.103182	0.101815	0.10499	0.0938634	0.0827818	0.0959307	0.117912	0.081271	0.0805884	0.0892388	0.0922049	0.0991418	0.10592	0.0988355	0.104787	0.0973271	0.0788522	0.0810384	0.102696	0.105414	0.0823658	0.098351	0.0817177	0.101344	0.106542	0.0888926	0.0867311	0.0882543	0.0954821
316	0.0998774	0.111364	0.0855963	0.0842112	0.123503	0.0855774	0.0800581	0.100482	0.0982818	0.0903556	0.106567	0.0770298	0.0800289	0.0977787	0.0993407	0.0947813	0.0762198	0.0915052	0.0984891	0.0939526	0.104634	0.10993	0.106647	0.0948606	0.0838661	0.0956218	0.121873	0.0818766	0.0813426	0.093599	0.0937485	0.103112	0.112529	0.0971076	0.106555	0.0984414	0.0782371	0.0839598	0.10604	0.11	0.0860276	0.100748	0.0821816	0.105111	0.10721	0.0938046	0.0855034	0.0917929	0.100742
318	0.0998211	0.114109	0.0901663	0.0841406	0.123859	0.085769	0.0811717	0.102648	0.0984863	0.0894426	0.102546	0.0784489	0.0802179	0.0991499	0.101886	0.0981009	0.0752292	0.0908709	0.0999422	0.0979541	0.106006	0.110051	0.108871	0.0954556	0.0811199	0.0977384	0.122402	0.081483	0.0801761	0.0958567	0.0933778	0.100967	0.116362	0.0974682	0.108488	0.101659	0.0796775	0.0869032	0.106021	0.107746	0.0844743	0.101069	0.0827382	0.106298	0.10548	0.0926798	0.0874256	0.0912214	0.0985574
320	0.102881	0.115994	0.0884847	0.0843822	0.122473	0.0850821	0.0813332	0.108758	0.0974528	0.0939512	0.101084	0.0796091	0.0812287	0.0975138	0.10299	0.100434	0.0762139	0.0896299	0.100057	0.099559	0.107267	0.110484	0.112455	0.0950491	0.0847472	0.0985544	0.121306	0.0835665	0.0828968	0.0987507	0.0981092	0.10181	0.118677	0.097283	0.107065	0.0988655	0.0819451	0.0893812	0.104829	0.105321	0.0863794	0.0996974	0.0870384	0.105256	0.107277	0.0943825	0.0890587	0.0923284	0.0970124
322	0.101141	0.113962	0.0915006	0.0848691	0.122597	0.0864784	0.0848762	0.108564	0.0967523	0.0935763	0.102168	0.0762565	0.0816549	0.0995427	0.103623	0.101566	0.07686	0.093155	0.103265	0.0985072	0.109587	0.115127	0.113157	0.0956114	0.0879898	0.0979266	0.121583	0.0852742	0.0848738	0.100305	0.100226	0.10257	0.118044	0.0969774	0.1061	0.0985467	0.0840035	0.0919453	0.102943	0.102196	0.0886672	0.101779	0.089552	0.108516	0.108928	0.0949722	0.0876343	0.0932166	0.100603
324	0.104087	0.112918	0.0917627	0.0851324	0.127173	0.0907764	0.0860734	0.108122	0.0974789	0.0909581	0.104409	0.0800242	0.0806943	0.100702	0.103668	0.10172	0.081645	0.0951932	0.10399	0.0975824	0.110717	0.116498	0.115157	0.0962328	0.0861953	0.10139	0.120004	0.0877675	0.0827966	0.100182	0.102979	0.103987	0.120703	0.0938823	0.103512	0.10216	0.0870488	0.0940895	0.105187	0.103023	0.0898579	0.104348	0.0921678	0.107911	0.10644	0.0959999	0.0864028	0.0964017	0.102217
326	0.103642	0.110269	0.0904613	0.0847134	0.129662	0.0878562	0.0857502	0.107024	0.0971175	0.0895365	0.105678	0.0788724	0.0788003	0.100085	0.104068	0.102719	0.0772669	0.094885	0.111681	0.0985478	0.111821	0.114932	0.114301	0.094641	0.0866744	0.102104	0.117612	0.0892033	0.081311	0.100926	0.105185	0.102764	0.117032	0.0953855	0.106526	0.102538	0.086685	0.0925853	0.106697	0.105005	0.0887107	0.102238	0.0912607	0.106491	0.10705	0.0970357	0.0885968	0.0962476	0.0989542
328	0.105181	0.11098	0.0877438	0.0877983	0.131471	0.0898365	0.0873167	0.108273	0.102303	0.0942308	0.108304	0.0792229	0.0805533	0.0973518	0.103628	0.0991516	0.0791349	0.0975633	0.111129	0.0978773	0.112584	0.117273	0.112702	0.0983047	0.0884373	0.100586	0.118139	0.0897029	0.083357	0.100067	0.108096	0.100597	0.117338	0.0940392	0.106527	0.104075	0.0862553	0.097885	0.108261	0.106986	0.0921205	0.103822	0.0926067	0.104706	0.110833	0.0983509	0.089628	0.100365	0.103877
330	0.102536	0.112725	0.0875898	0.0861948	0.132172	0.0904412	0.0893243	0.107282	0.105427	0.0931455	0.107454	0.081422	0.0843662	0.0988978	0.108413	0.0977023	0.0794954	0.0996804	0.116222	0.101138	0.110823	0.117684	0.113166	0.102417	0.0884094	0.0996251	0.121012	0.0879489	0.0815718	0.0994526	0.105502	0.105769	0.119272	0.0933768	0.11028	0.106299	0.0847402	0.0995802	0.109763	0.111067	0.0918485	0.102206	0.0921827	0.105991	0.112132	0.0940294	0.0887443	0.102784	0.1058
332	0.106633	0.111015	0.0876007	0.0871134	0.135054	0.094875	0.0880463	0.106805	0.106726	0.0946342	0.103455	0.0870492	0.0881612	0.101079	0.106643	0.0969178	0.0799154	0.100976	0.115165	0.105014	0.111849	0.118622	0.112659	0.0998621	0.0870359	0.101309	0.126105	0.0856175	0.0803329	0.0986845	0.105644	0.107148	0.121236	0.0956334	0.110874	0.10702	0.0831074	0.0994106	0.111847	0.112519	0.0949982	0.103459	0.0951474	0.104306	0.113039	0.0949787	0.0898806	0.105873	0.107092
334	0.105755	0.111867	0.0894277	0.09162	0.133996	0.0943993	0.0895239	0.107142	0.109188	0.0968931	0.105444	0.0907582	0.0887173	0.101447	0.109598	0.0999208	0.0808689	0.100939	0.120099	0.107065	0.114043	0.117853	0.114953	0.101833	0.0883557	0.103788	0.131259	0.0872776	0.0807419	0.100093	0.104986	0.10873	0.121298	0.0999868	0.10859	0.107473	0.0841713	0.0972547	0.113039	0.11496	0.0940151	0.104766	0.0950667	0.109503	0.119056	0.0961427	0.0906565	0.104378	0.108023
336	0.106172	0.115437	0.0942245	0.0935041	0.133241	0.0961926	0.0933817	0.109633	0.110837	0.0991348	0.108862	0.094559	0.0894142	0.104373	0.111607	0.10051	0.0851134	0.101024	0.118495	0.106471	0.115528	0.119738	0.117856	0.105872	0.0886142	0.106971	0.131985	0.0885086	0.0808093	0.0989394	0.10273	0.110694	0.12344	0.104302	0.108204	0.105301	0.0880748	0.102492	0.114236	0.116683	0.0962186	0.105844	0.0971636	0.109601	0.122564	0.0950208	0.0907176	0.105255	0.111004
338	0.111257	0.11301	0.094963	0.0928078	0.133944	0.0946656	0.0946893	0.107862	0.107238	0.0953373	0.109978	0.0963897	0.0892895	0.110473	0.113178	0.0984046	0.0815491	0.0954263	0.121033	0.106095	0.113522	0.124069	0.118362	0.105272	0.0870055	0.105662	0.133154	0.0905442	0.0808903	0.0979182	0.0989498	0.111422	0.122443	0.103431	0.105489	0.105496	0.0869499	0.100279	0.113864	0.118959	0.0963909	0.103581	0.0974507	0.110001	0.12046	0.0939696	0.0895257	0.102902	0.105958
340	0.110635	0.103754	0.0902896	0.0886071	0.131023	0.0894011	0.089265	0.105344	0.102685	0.0895979	0.109869	0.0918844	0.0813525	0.107358	0.10305	0.0910828	0.0784364	0.0839917	0.1127	0.0965881	0.108456	0.124102	0.115394	0.0970267	0.0845913	0.1048	0.129005	0.0848303	0.0797612	0.0931295	0.0943421	0.102524	0.11859	0.0953981	0.0968099	0.0989793	0.0830699	0.0928984	0.10832	0.113716	0.0957456	0.105044	0.0951483	0.107205	0.115573	0.0939413	0.0856186	0.0998776	0.100671
342	0.10213	0.109161	0.088958	0.0896446	0.131646	0.0890606	0.0925327	0.108552	0.103303	0.0902509	0.112036	0.0966925	0.0844917	0.106005	0.104541	0.0933706	0.0795637	0.0876978	0.115485	0.0982337	0.108382	0.126043	0.117037	0.097909	0.0883219	0.108285	0.126921	0.0873895	0.0815163	0.0945215	0.0963768	0.101299	0.121287	0.0973035	0.0969256	0.099625	0.0860731	0.0910819	0.112542	0.113774	0.095039	0.108729	0.0956344	0.110088	0.11876	0.0957309	0.08845	0.102905	0.0991046
344	0.0801788	0.111977	0.089894	0.0890207	0.136231	0.0876656	0.0919564	0.110499	0.105802	0.0931311	0.114776	0.0952991	0.0867188	0.108276	0.106009	0.0920272	0.0801006	0.0919093	0.114381	0.100141	0.109723	0.125942	0.116716	0.100082	0.0920682	0.10806	0.127294	0.085479	0.0808985	0.0967543	0.0986352	0.101168	0.122002	0.0976068	0.10528	0.100597	0.0862642	0.0981557	0.114613	0.114402	0.0997926	0.108413	0.0956509	0.10784	0.117795	0.0968905	0.0880275	0.105219	0.0999988
346	0.115569	0.114822	0.086101	0.0939547	0.137185	0.0903136	0.0924258	0.10991	0.105311	0.0978679	0.116144	0.0964611	0.0869877	0.106259	0.104853	0.0935557	0.0797144	0.0928657	0.112552	0.108296	0.110382	0.122748	0.116428	0.101019	0.0957906	0.108679	0.132366	0.0874841	0.0881117	0.0986227	0.102595	0.105498	0.124946	0.0953839	0.107614	0.103437	0.0877413	0.100974	0.11534	0.117284	0.10336	0.112099	0.099564	0.110301	0.116789	0.0985502	0.08839	0.105605	0.102501
348	0.117234	0.122108	0.0904088	0.0965341	0.138171	0.0927698	0.0909575	0.111936	0.112235	0.103673	0.116746	0.0963605	0.0880594	0.105312	0.105578	0.0996605	0.0866905	0.0978466	0.112973	0.112434	0.114502	0.121011	0.119883	0.101432	0.100541	0.112054	0.134202	0.0909869	0.0896177	0.103719	0.110992	0.109792	0.126209	0.0995794	0.112139	0.105237	0.0927672	0.102546	0.12081	0.119397	0.104015	0.115187	0.104207	0.115312	0.120995	0.100118	0.0912185	0.107465	0.107235
350	0.120411	0.135065	0.0971232	0.105752	0.147042	0.0982138	0.0972089	0.118529	0.117731	0.112577	0.11871	0.104271	0.0974722	0.109965	0.112057	0.107493	0.0896316	0.109378	0.118952	0.120419	0.121171	0.12517	0.125268	0.108181	0.102282	0.114374	0.139203	0.0971138	0.094898	0.110803	0.116357	0.114247	0.133424	0.111216	0.117555	0.114758	0.100055	0.110359	0.130345	0.128092	0.107036	0.119616	0.108131	0.120345	0.126145	0.106617	0.0982155	0.113226	0.1148
352	0.118285	0.136346	0.104538	0.105706	0.145219	0.0990826	0.0960552	0.120064	0.116808	0.115306	0.121308	0.101389	0.0926116	0.112545	0.113405	0.105905	0.0934126	0.107274	0.120825	0.121554	0.124354	0.129689	0.127594	0.111961	0.102029	0.11489	0.144501	0.0989876	0.0935469	0.113116	0.115878	0.117469	0.135294	0.110933	0.118896	0.114891	0.0994487	0.117147	0.125322	0.127649	0.107422	0.115619	0.11015	0.123172	0.125322	0.109672	0.0993988	0.112959	0.11564
354	0.117305	0.136506	0.10598	0.106014	0.141441	0.101331	0.0966069	0.119213	0.113767	0.117198	0.120642	0.104235	0.090445	0.114571	0.115708	0.108002	0.0890068	0.102915	0.117324	0.12204	0.125925	0.134476	0.126773	0.111983	0.101069	0.116115	0.1459	0.0996282	0.0959085	0.112495	0.116454	0.120147	0.136057	0.111895	0.119879	0.112247	0.101603	0.113148	0.123222	0.128297	0.107812	0.115763	0.112034	0.122546	0.126269	0.107934	0.103939	0.111817	0.117902
356	0.119901	0.132957	0.113913	0.101029	0.143947	0.100678	0.0957858	0.123531	0.115599	0.114709	0.120804	0.102755	0.0932789	0.117876	0.117331	0.110196	0.0888275	0.106853	0.119196	0.118845	0.128514	0.139734	0.124895	0.113246	0.100872	0.118091	0.146062	0.0997689	0.0923791	0.115674	0.119946	0.118015	0.136327	0.110117	0.121853	0.112369	0.0991739	0.111233	0.122219	0.127318	0.105338	0.116382	0.111118	0.126018	0.13091	0.108672	0.103749	0.114985	0.11618
358	0.119814	0.128194	0.114119	0.0999084	0.14265	0.103991	0.100115	0.126721	0.112384	0.113124	0.123553	0.106406	0.0939939	0.116803	0.114543	0.108899	0.086332	0.107712	0.119872	0.117609	0.130697	0.144191	0.125799	0.114098	0.103263	0.125956	0.14873	0.100493	0.0924854	0.113474	0.118358	0.119977	0.141065	0.111196	0.123905	0.115998	0.0975996	0.111709	0.120363	0.129451	0.109597	0.119029	0.111936	0.126682	0.131837	0.107137	0.102887	0.120567	0.120621
360	0.122727	0.126135	0.118141	0.0968509	0.145604	0.106395	0.103557	0.127546	0.113074	0.115369	0.130433	0.107605	0.0927541	0.120706	0.114639	0.117485	0.0967476	0.109134	0.123206	0.117139	0.13471	0.147588	0.130065	0.118375	0.105976	0.126248	0.149991	0.103236	0.0952594	0.11525	0.121432	0.122563	0.137793	0.110011	0.127736	0.120028	0.096479	0.114023	0.116684	0.130576	0.112809	0.119368	0.114855	0.131059	0.137411	0.107604	0.103898	0.122587	0.124728
362	0.121767	0.126749	0.114015	0.097679	0.152395	0.107363	0.105651	0.128921	0.113453	0.115185	0.132392	0.106986	0.0927463	0.120944	0.111578	0.116951	0.0955917	0.109026	0.118996	0.114867	0.132982	0.148714	0.129695	0.120377	0.106551	0.129179	0.150363	0.105152	0.0986933	0.115761	0.123854	0.125172	0.140783	0.10993	0.126314	0.122074	0.0986783	0.113646	0.121353	0.13361	0.11817	0.122258	0.11376	0.132495	0.137585	0.106147	0.104817	0.122552	0.128386
364	0.12637	0.132098	0.112836	0.0970867	0.152684	0.10736	0.10811	0.130421	0.112808	0.114615	0.131076	0.107389	0.0966796	0.118617	0.111671	0.116663	0.100801	0.111655	0.125101	0.114038	0.132616	0.149768	0.134025	0.121791	0.107895	0.131888	0.154504	0.107112	0.0999227	0.122919	0.126458	0.130748	0.145205	0.110636	0.124095	0.127225	0.0973764	0.115987	0.125731	0.135207	0.119363	0.124006	0.113242	0.139474	0.139883	0.105529	0.106193	0.126954	0.128053
366	0.124883	0.137476	0.112476	0.0982173	0.154199	0.107149	0.110566	0.13414	0.112845	0.117052	0.130962	0.107463	0.0964962	0.122413	0.113516	0.117743	0.101333	0.108403	0.127224	0.117223	0.129913	0.156408	0.137654	0.124418	0.109712	0.130271	0.15733	0.107541	0.100239	0.122669	0.124355	0.132072	0.142848	0.114307	0.125994	0.128098	0.101154	0.119157	0.127348	0.134424	0.122499	0.124593	0.116443	0.13947	0.141755	0.107945	0.108826	0.131619	0.132731
368	0.128861	0.13851	0.109263	0.101005	0.16045	0.108112	0.11075	0.13372	0.113812	0.124041	0.13314	0.105355	0.0966985	0.124063	0.115055	0.121603	0.105098	0.109571	0.128622	0.118199	0.130071	0.154419	0.138719	0.126383	0.10814	0.125086	0.155001	0.106851	0.0999394	0.126728	0.124064	0.132539	0.145232	0.115514	0.125836	0.125124	0.10402	0.118703	0.125916	0.136186	0.121746	0.12623	0.115583	0.139774	0.146125	0.109584	0.10977	0.129037	0.130758
370	0.128425	0.134008	0.102588	0.100875	0.155573	0.105432	0.109662	0.132651	0.112905	0.122299	0.132714	0.101216	0.094158	0.117332	0.113055	0.115536	0.0921593	0.105511	0.124436	0.116377	0.124514	0.15281	0.130911	0.123241	0.110009	0.127368	0.151587	0.102095	0.0974108	0.124402	0.12369	0.132162	0.144752	0.113861	0.124536	0.114248	0.104013	0.115574	0.126539	0.131938	0.120994	0.122074	0.111416	0.139789	0.140829	0.105115	0.106506	0.126324	0.124013
372	0.126941	0.132848	0.102276	0.0994794	0.153635	0.104523	0.11166	0.132398	0.114474	0.122243	0.13208	0.102357	0.0979334	0.11626	0.118679	0.123273	0.0970188	0.110683	0.128077	0.114509	0.127249	0.152535	0.132799	0.123707	0.109419	0.126137	0.149912	0.0985947	0.0947059	0.120244	0.124048	0.130218	0.141342	0.114038	0.128472	0.113992	0.104589	0.117059	0.126591	0.132125	0.117945	0.12449	0.111962	0.14173	0.142482	0.105041	0.105644	0.128016	0.125951
374	0.109081	0.13199	0.106347	0.101809	0.156476	0.10366	0.115783	0.133788	0.116227	0.123606	0.137976	0.101669	0.0971138	0.120598	0.117658	0.125573	0.0966717	0.111516	0.127967	0.114643	0.130762	0.15489	0.129765	0.124743	0.109496	0.125193	0.148427	0.101974	0.0958931	0.114405	0.127861	0.127946	0.141516	0.115057	0.132584	0.112005	0.108137	0.12061	0.127467	0.136835	0.118924	0.124917	0.114282	0.141003	0.142792	0.106867	0.103771	0.12878	0.130712
376	0.126024	0.132758	0.106934	0.10701	0.156346	0.103564	0.114784	0.13423	0.114374	0.128568	0.144436	0.10356	0.100518	0.118705	0.117071	0.125245	0.0961874	0.11787	0.130104	0.111154	0.134087	0.153225	0.129613	0.12499	0.10884	0.126977	0.149391	0.102528	0.098144	0.115485	0.131343	0.127213	0.14837	0.118023	0.132897	0.116608	0.110407	0.119244	0.1303	0.140246	0.121823	0.128883	0.111891	0.142346	0.141213	0.104937	0.105163	0.127038	0.133691
378	0.132698	0.135579	0.11445	0.109658	0.158598	0.103219	0.115756	0.137095	0.114546	0.12689	0.143194	0.107278	0.09932	0.126423	0.121151	0.124659	0.0952991	0.117694	0.132164	0.114911	0.137276	0.157636	0.130891	0.129137	0.109866	0.128362	0.151793	0.103137	0.101303	0.117551	0.13516	0.129195	0.149725	0.120689	0.134576	0.120237	0.110557	0.123625	0.135545	0.142643	0.123421	0.128535	0.11402	0.147083	0.144387	0.108247	0.107213	0.128326	0.139321
380	0.135877	0.143504	0.121273	0.115536	0.165126	0.108107	0.115508	0.141274	0.118254	0.131006	0.146088	0.110044	0.101759	0.132256	0.128941	0.129682	0.103298	0.126932	0.13858	0.123058	0.145413	0.161746	0.14101	0.130685	0.108679	0.131777	0.159299	0.109231	0.105369	0.126169	0.1374	0.135502	0.155543	0.125439	0.135846	0.127807	0.114288	0.129097	0.142378	0.148721	0.126125	0.132844	0.119127	0.150795	0.151974	0.114054	0.114369	0.131585	0.149313
382	0.140366	0.149076	0.124263	0.119927	0.171241	0.110401	0.116006	0.14293	0.120272	0.135894	0.149055	0.110723	0.102278	0.136095	0.130508	0.129698	0.098569	0.125705	0.14308	0.126808	0.147012	0.163415	0.145136	0.133511	0.113416	0.137228	0.162154	0.112749	0.110746	0.134315	0.139851	0.139233	0.157676	0.126312	0.134258	0.128084	0.112376	0.132041	0.146123	0.155766	0.126168	0.134885	0.123909	0.150214	0.152973	0.116756	0.114955	0.13356	0.155921
384	0.138098	0.153687	0.127627	0.121871	0.177597	0.114521	0.115159	0.141856	0.12711	0.134963	0.151508	0.1132	0.104092	0.137443	0.134151	0.130845	0.101102	0.132074	0.147464	0.132122	0.149562	0.169219	0.148379	0.133635	0.115552	0.139886	0.163	0.111142	0.11362	0.138771	0.139815	0.140177	0.158599	0.130423	0.131428	0.128999	0.110974	0.136097	0.145121	0.154374	0.125647	0.13817	0.124598	0.152585	0.155051	0.12114	0.1162	0.133448	0.153961
386	0.138147	0.154325	0.13148	0.121393	0.178579	0.118798	0.117649	0.140943	0.131898	0.129709	0.146069	0.115949	0.102237	0.139809	0.135244	0.134927	0.100635	0.133155	0.150379	0.13192	0.149358	0.169946	0.155184	0.134071	0.117238	0.1423	0.164248	0.113884	0.109796	0.136609	0.141029	0.14427	0.157726	0.130308	0.134598	0.12818	0.11181	0.141968	0.147904	0.156399	0.126123	0.135123	0.129877	0.156364	0.160143	0.120914	0.11686	0.129833	0.153093
388	0.140467	0.154273	0.129702	0.119138	0.177791	0.121357	0.115992	0.140081	0.134454	0.130357	0.147609	0.118906	0.103866	0.136339	0.138741	0.136749	0.100188	0.131772	0.150085	0.130731	0.150845	0.171334	0.157722	0.133235	0.117569	0.145875	0.165683	0.118225	0.1087	0.135547	0.139737	0.145093	0.158326	0.126142	0.132436	0.128274	0.11202	0.142458	0.147132	0.157359	0.12723	0.135939	0.132001	0.157869	0.158453	0.117903	0.116592	0.1309	0.153891
390	0.141049	0.15861	0.127668	0.118362	0.184555	0.123126	0.118973	0.140384	0.135476	0.129421	0.14953	0.120179	0.106035	0.137619	0.137075	0.137289	0.0975226	0.129123	0.155076	0.130405	0.148903	0.176775	0.159054	0.136902	0.119704	0.150345	0.166594	0.119929	0.107264	0.133017	0.142515	0.146286	0.160201	0.132822	0.135897	0.13466	0.115133	0.143342	0.148913	0.156767	0.126722	0.141869	0.134969	0.159679	0.15489	0.117059	0.117225	0.133113	0.155951
392	0.1411	0.158078	0.127448	0.119409	0.183082	0.125404	0.117708	0.142524	0.140356	0.130124	0.150651	0.122984	0.106928	0.141254	0.139342	0.138234	0.0984533	0.13225	0.152223	0.132884	0.149712	0.176805	0.156736	0.132365	0.120764	0.146813	0.170209	0.122976	0.103972	0.133299	0.146201	0.145597	0.16305	0.13507	0.141883	0.137835	0.119659	0.147439	0.150102	0.157151	0.130966	0.144207	0.136593	0.158413	0.157006	0.115225	0.120078	0.13105	0.150434
394	0.144659	0.159183	0.122853	0.121931	0.18742	0.127904	0.115952	0.146559	0.139819	0.134013	0.148508	0.121315	0.110486	0.143357	0.135782	0.140106	0.0980302	0.128221	0.151816	0.133591	0.149282	0.175779	0.165185	0.137806	0.119785	0.146504	0.172874	0.123298	0.103441	0.133391	0.14315	0.149097	0.161764	0.133839	0.143197	0.140851	0.12174	0.145391	0.149048	0.160936	0.1367	0.14439	0.138879	0.160446	0.159939	0.116074	0.122088	0.133429	0.154234
396	0.146896	0.162626	0.118817	0.122985	0.194867	0.127656	0.117521	0.148836	0.1407	0.137682	0.152958	0.12132	0.111637	0.144931	0.13683	0.141228	0.103479	0.126826	0.154347	0.139822	0.154237	0.179959	0.163654	0.142942	0.120796	0.147643	0.174119	0.122671	0.109706	0.138463	0.143678	0.151269	0.165455	0.132163	0.140454	0.141739	0.118644	0.141385	0.151649	0.161146	0.137104	0.14887	0.140852	0.162747	0.160457	0.12289	0.124662	0.13849	0.155491
398	0.148509	0.166487	0.122828	0.1272	0.204685	0.130152	0.120805	0.152897	0.1409	0.139161	0.157239	0.121034	0.111659	0.147967	0.136953	0.143944	0.109153	0.136685	0.161416	0.145198	0.155396	0.18145	0.167837	0.144038	0.125377	0.150843	0.177281	0.121275	0.112502	0.140198	0.149947	0.151762	0.164543	0.139323	0.145451	0.14609	0.118771	0.145216	0.157183	0.164149	0.141167	0.150719	0.141033	0.165624	0.16471	0.129895	0.129391	0.140292	0.16215
400	0.151232	0.168637	0.12578	0.131301	0.204959	0.130784	0.126817	0.15548	0.140424	0.144921	0.16088	0.124041	0.112404	0.154684	0.139605	0.146619	0.117536	0.140635	0.15754	0.144717	0.157204	0.182711	0.170988	0.147317	0.129806	0.152347	0.179775	0.121497	0.114727	0.144428	0.154265	0.154258	0.173275	0.136742	0.145775	0.137969	0.120423	0.149157	0.157854	0.170908	0.144738	0.150114	0.142967	0.170481	0.169325	0.133521	0.128816	0.142859	0.163282
402	0.157993	0.169789	0.127282	0.132503	0.20434	0.132517	0.131521	0.163126	0.139155	0.147761	0.165226	0.125425	0.115776	0.15259	0.141654	0.147605	0.122489	0.141911	0.162823	0.141836	0.160815	0.188116	0.176283	0.156667	0.129691	0.154618	0.179375	0.122577	0.117048	0.147752	0.153805	0.158374	0.176848	0.144607	0.148437	0.142639	0.121927	0.146962	0.160427	0.167965	0.14603	0.151853	0.14173	0.177695	0.171376	0.134884	0.130869	0.146514	0.165335
404	0.157708	0.168011	0.13205	0.129075	0.203312	0.132589	0.134867	0.167904	0.136335	0.14762	0.169063	0.12948	0.11472	0.151716	0.147839	0.146448	0.123139	0.146203	0.158739	0.142979	0.161869	0.187667	0.176643	0.156068	0.131866	0.156777	0.180337	0.124919	0.121648	0.153112	0.159401	0.159838	0.17911	0.147201	0.149556	0.145376	0.124092	0.148406	0.161435	0.169862	0.14505	0.156196	0.143873	0.179733	0.172211	0.137671	0.128443	0.147689	0.166711
406	0.154327	0.166669	0.133731	0.128667	0.207921	0.139548	0.135277	0.170549	0.137748	0.149802	0.170691	0.13252	0.118425	0.154121	0.155754	0.15047	0.127258	0.144581	0.156512	0.142507	0.163795	0.187744	0.180689	0.154651	0.130154	0.16074	0.187472	0.127755	0.122153	0.151622	0.160786	0.159731	0.180913	0.151472	0.15532	0.145088	0.127004	0.153092	0.15788	0.171817	0.147411	0.158117	0.143352	0.177875	0.174157	0.137081	0.129046	0.148049	0.17094
408	0.157686	0.168767	0.130472	0.129344	0.205745	0.142169	0.136415	0.175238	0.135411	0.152057	0.173406	0.133359	0.122967	0.157482	0.155312	0.152693	0.125899	0.143073	0.155665	0.142536	0.160565	0.191053	0.179655	0.154937	0.133192	0.159301	0.193848	0.129237	0.119012	0.152698	0.164097	0.166181	0.184543	0.15328	0.154577	0.146612	0.132669	0.154139	0.159284	0.174696	0.147958	0.163113	0.143381	0.17892	0.175382	0.136043	0.128218	0.151733	0.163721
410	0.159651	0.167639	0.132002	0.127009	0.207918	0.141997	0.133921	0.176951	0.138141	0.14837	0.169189	0.131309	0.12415	0.15357	0.159464	0.15277	0.126433	0.142975	0.158204	0.145502	0.165004	0.188712	0.17841	0.15629	0.135386	0.156275	0.197625	0.132627	0.115979	0.151478	0.163032	0.163756	0.180819	0.155931	0.151864	0.15531	0.132967	0.150791	0.162802	0.174829	0.153117	0.164243	0.140654	0.178275	0.173297	0.135399	0.130938	0.15453	0.163266
412	0.164013	0.173017	0.134049	0.129463	0.213111	0.141321	0.132774	0.175978	0.139334	0.145676	0.167056	0.131261	0.119965	0.159439	0.157064	0.153879	0.125439	0.139174	0.1562	0.153018	0.16323	0.191168	0.17823	0.153509	0.137836	0.158057	0.202437	0.132582	0.119228	0.148787	0.163487	0.166846	0.181853	0.157226	0.148847	0.157567	0.134592	0.153585	0.161757	0.181419	0.159066	0.162681	0.146305	0.1831	0.178991	0.140436	0.130412	0.157809	0.16848
414	0.157546	0.175041	0.135105	0.130007	0.216144	0.143471	0.134844	0.176938	0.143063	0.149696	0.174663	0.131483	0.121205	0.163547	0.158248	0.161544	0.129408	0.137246	0.159754	0.153089	0.162644	0.196523	0.178887	0.158485	0.139329	0.164805	0.209282	0.133259	0.116242	0.145879	0.163593	0.16816	0.187237	0.159543	0.152095	0.159025	0.133264	0.156884	0.167418	0.183874	0.16287	0.163315	0.150503	0.183495	0.181735	0.142613	0.135211	0.159557	0.167074
416	0.162018	0.179862	0.141704	0.133248	0.215373	0.140232	0.134489	0.178502	0.142604	0.150415	0.175899	0.129221	0.119458	0.162586	0.151754	0.158599	0.127209	0.139483	0.158171	0.155445	0.159637	0.19921	0.179163	0.158862	0.141466	0.165837	0.209794	0.134092	0.118375	0.147775	0.163254	0.169826	0.190521	0.158739	0.147222	0.161871	0.131782	0.159726	0.169626	0.182697	0.165492	0.162122	0.15076	0.187471	0.179776	0.142919	0.133342	0.162766	0.169095
418	0.169263	0.183972	0.148097	0.130568	0.218846	0.137448	0.136165	0.175018	0.149061	0.152176	0.174395	0.129629	0.118536	0.163037	0.158031	0.161974	0.128206	0.139685	0.155743	0.155122	0.166573	0.201751	0.180302	0.16233	0.14165	0.17053	0.215268	0.134969	0.123611	0.151079	0.160063	0.169066	0.191309	0.161817	0.151051	0.158737	0.127884	0.165222	0.167566	0.181765	0.167017	0.160864	0.156285	0.188882	0.180118	0.14502	0.135693	0.162352	0.175582
420	0.164822	0.186985	0.151686	0.135952	0.220999	0.14048	0.141552	0.181834	0.152606	0.156743	0.182194	0.133663	0.121578	0.166396	0.158043	0.167794	0.13149	0.143164	0.16226	0.158935	0.166754	0.207173	0.185098	0.161987	0.137441	0.180278	0.223388	0.135869	0.131485	0.153647	0.159539	0.172315	0.195172	0.163577	0.156149	0.160105	0.128145	0.173027	0.170695	0.182874	0.169405	0.163554	0.160298	0.195132	0.183005	0.149328	0.132274	0.16306	0.179338
422	0.170544	0.189725	0.156846	0.13575	0.226965	0.144368	0.141874	0.183703	0.156658	0.160436	0.193587	0.134561	0.127413	0.166247	0.160656	0.174867	0.136593	0.149575	0.162701	0.15756	0.166811	0.203774	0.189682	0.163212	0.139212	0.187789	0.227765	0.137545	0.13375	0.158885	0.162337	0.173396	0.198858	0.162926	0.162144	0.16121	0.127953	0.171557	0.175239	0.187422	0.169354	0.167867	0.160235	0.194397	0.185619	0.149768	0.133193	0.167227	0.178318
424	0.177095	0.190885	0.156471	0.139349	0.230697	0.145725	0.140767	0.186141	0.157617	0.15845	0.187393	0.140519	0.127588	0.17006	0.163965	0.177125	0.140191	0.153507	0.169115	0.158999	0.17194	0.211676	0.191047	0.163629	0.140891	0.1881	0.230881	0.140603	0.13181	0.162329	0.164749	0.173714	0.200266	0.165624	0.165526	0.164547	0.130101	0.172007	0.179156	0.191822	0.171502	0.170655	0.159369	0.197067	0.187842	0.14847	0.139115	0.168788	0.189062
426	0.176779	0.189189	0.156106	0.136674	0.228656	0.147991	0.14204	0.188488	0.162374	0.15875	0.19423	0.146066	0.12854	0.176691	0.167659	0.181382	0.140747	0.156376	0.177261	0.157693	0.177764	0.212392	0.194617	0.165139	0.143179	0.191081	0.231943	0.139873	0.133677	0.165696	0.169275	0.176299	0.204343	0.173941	0.171422	0.163116	0.132376	0.17257	0.18109	0.199242	0.171331	0.176457	0.164461	0.198854	0.192581	0.150061	0.147294	0.172099	0.1888
428	0.181115	0.191974	0.154805	0.142366	0.235192	0.150595	0.141892	0.1872	0.1639	0.157319	0.19655	0.148666	0.128917	0.173688	0.168699	0.178643	0.142212	0.153159	0.17892	0.157883	0.177937	0.215998	0.196665	0.170676	0.140338	0.192848	0.234868	0.140145	0.135505	0.166295	0.169323	0.176457	0.207521	0.174188	0.17335	0.16527	0.137106	0.169673	0.182361	0.201834	0.170867	0.177909	0.162765	0.203875	0.189426	0.148753	0.147139	0.176077	0.18839
430	0.174185	0.194958	0.158119	0.139049	0.23949	0.149659	0.139543	0.183143	0.164091	0.154643	0.19622	0.152473	0.131563	0.177644	0.173454	0.178811	0.142434	0.149446	0.174638	0.153435	0.176661	0.213253	0.196681	0.17494	0.145126	0.188642	0.228348	0.137678	0.12972	0.166855	0.172363	0.175109	0.207952	0.174764	0.178192	0.16271	0.137276	0.1735	0.182419	0.203246	0.165364	0.178715	0.165474	0.201388	0.194691	0.149048	0.150792	0.178447	0.190593
432	0.176559	0.195587	0.157406	0.142733	0.240144	0.152861	0.142105	0.18423	0.162513	0.16	0.189403	0.152201	0.129535	0.180602	0.180074	0.179039	0.140314	0.153029	0.181686	0.158926	0.179172	0.217438	0.197847	0.177277	0.145325	0.186881	0.228317	0.136096	0.128755	0.168771	0.171671	0.176045	0.21174	0.178571	0.177065	0.162034	0.142842	0.175758	0.182287	0.204698	0.165419	0.179733	0.165309	0.20505	0.193686	0.154949	0.152979	0.178518	0.196257
434	0.177	0.202322	0.159572	0.142092	0.238545	0.15514	0.144033	0.18254	0.164687	0.162972	0.195364	0.148217	0.129052	0.180445	0.178656	0.177626	0.137216	0.156862	0.179821	0.160717	0.178109	0.212906	0.19625	0.174221	0.14614	0.186867	0.228658	0.13367	0.133397	0.171932	0.172658	0.175798	0.213776	0.180415	0.181467	0.162002	0.140601	0.177867	0.182344	0.20233	0.163365	0.18186	0.165116	0.20446	0.192578	0.156789	0.149506	0.182138	0.193874
436	0.182386	0.210231	0.158356	0.149851	0.2489	0.157929	0.148534	0.182649	0.161519	0.164201	0.192817	0.151317	0.134082	0.1807	0.182095	0.183416	0.137133	0.162587	0.1792	0.162632	0.181289	0.21175	0.198578	0.178554	0.15036	0.191513	0.23173	0.137403	0.134224	0.174084	0.174424	0.179328	0.213366	0.177793	0.183064	0.165689	0.148613	0.18119	0.183322	0.200258	0.165764	0.181256	0.161331	0.204344	0.192121	0.16096	0.146239	0.184719	0.201224
438	0.182297	0.211559	0.158288	0.144097	0.24861	0.158632	0.1512	0.19207	0.161066	0.164514	0.198574	0.152119	0.136853	0.184499	0.179173	0.186417	0.142949	0.16799	0.182051	0.169663	0.181322	0.215537	0.198501	0.176779	0.157424	0.195494	0.229615	0.136111	0.136447	0.178023	0.177255	0.182116	0.217674	0.177273	0.181539	0.170757	0.146904	0.18524	0.188019	0.202323	0.172153	0.186806	0.161692	0.205066	0.200374	0.164826	0.149523	0.190722	0.205852
440	0.187099	0.21698	0.161825	0.147071	0.251739	0.162382	0.15516	0.19526	0.161447	0.171668	0.200871	0.154292	0.13239	0.180639	0.179125	0.188437	0.142234	0.171107	0.183463	0.173713	0.182328	0.223264	0.202206	0.176319	0.158352	0.200067	0.241641	0.138452	0.140844	0.178059	0.175216	0.187106	0.217076	0.177137	0.182753	0.177204	0.150291	0.183323	0.190451	0.205809	0.180213	0.187402	0.164421	0.205851	0.202134	0.168314	0.151761	0.191111	0.20739
442	0.187776	0.216617	0.159816	0.145098	0.251493	0.161152	0.160104	0.194551	0.163735	0.168271	0.206366	0.159998	0.134841	0.182176	0.175348	0.185972	0.142159	0.165137	0.177859	0.173944	0.184513	0.226153	0.201763	0.176498	0.161506	0.202124	0.245662	0.1388	0.140378	0.173303	0.178123	0.18489	0.212817	0.173881	0.177725	0.172806	0.146693	0.184853	0.193372	0.206184	0.180745	0.19162	0.162747	0.205414	0.204329	0.163098	0.153712	0.194807	0.206088
444	0.188777	0.21523	0.153995	0.146495	0.258301	0.163723	0.160995	0.198323	0.162929	0.16927	0.209063	0.162337	0.135509	0.180713	0.178385	0.188242	0.141089	0.163076	0.178658	0.171951	0.186249	0.228814	0.208067	0.180594	0.163581	0.203125	0.249273	0.140218	0.137674	0.173051	0.179547	0.185054	0.213971	0.170888	0.171254	0.16796	0.149144	0.188881	0.1935	0.209496	0.182117	0.194042	0.166458	0.206841	0.207202	0.162488	0.15102	0.19289	0.210575
446	0.183189	0.216454	0.156522	0.142571	0.261533	0.163976	0.159177	0.201163	0.167209	0.172425	0.213224	0.160025	0.132908	0.174662	0.182913	0.184235	0.144105	0.157691	0.178	0.17438	0.187423	0.235232	0.206124	0.178478	0.163473	0.196443	0.25434	0.137035	0.135532	0.172513	0.176571	0.184381	0.212417	0.170813	0.171178	0.166321	0.143572	0.190169	0.197096	0.210558	0.181975	0.195188	0.170547	0.211663	0.207218	0.161573	0.151875	0.192136	0.209606
448	0.185178	0.21532	0.156624	0.146689	0.260758	0.163155	0.159464	0.201391	0.167745	0.173485	0.21183	0.158284	0.133042	0.179034	0.184592	0.18407	0.138912	0.159282	0.180377	0.169988	0.189037	0.235201	0.208765	0.18139	0.159708	0.195009	0.260529	0.139536	0.132799	0.177319	0.177023	0.183561	0.210266	0.172624	0.173161	0.162073	0.151359	0.189123	0.197322	0.208004	0.182138	0.194124	0.173974	0.214383	0.207031	0.162318	0.149558	0.193878	0.20919
450	0.188991	0.211563	0.151263	0.150143	0.261655	0.168806	0.155832	0.205137	0.167135	0.172465	0.21208	0.155593	0.138739	0.186649	0.184327	0.184241	0.139974	0.160066	0.178551	0.171665	0.192057	0.239472	0.206406	0.183984	0.16171	0.196357	0.2619	0.142279	0.132588	0.178844	0.182954	0.184518	0.214346	0.172126	0.168896	0.162205	0.151648	0.192593	0.190924	0.210936	0.181545	0.197632	0.173467	0.216684	0.210903	0.161245	0.149125	0.196042	0.216113
452	0.188376	0.213434	0.155263	0.152506	0.272706	0.169409	0.156509	0.213628	0.16944	0.175474	0.216259	0.157119	0.140683	0.19019	0.185335	0.187259	0.143016	0.16168	0.180789	0.174405	0.19488	0.247574	0.210381	0.190391	0.161382	0.196735	0.272178	0.146524	0.134589	0.184523	0.187996	0.18865	0.219278	0.174905	0.179791	0.164423	0.153403	0.19681	0.194546	0.210179	0.184004	0.19853	0.179265	0.221275	0.214544	0.166595	0.149032	0.194579	0.223441
454	0.193771	0.219472	0.162492	0.154839	0.275095	0.1714	0.162663	0.219831	0.174398	0.176256	0.217166	0.155188	0.138978	0.193656	0.186799	0.191202	0.145747	0.163373	0.181765	0.181455	0.195899	0.249766	0.211548	0.194569	0.16228	0.203297	0.280679	0.149977	0.139151	0.184125	0.188221	0.192411	0.220108	0.182155	0.187301	0.168487	0.157116	0.197617	0.195884	0.211531	0.185333	0.199154	0.180665	0.226463	0.214408	0.172802	0.155614	0.204285	0.226651
456	0.200821	0.226501	0.164426	0.158197	0.27718	0.175856	0.166911	0.222749	0.174348	0.176219	0.217183	0.159201	0.14338	0.20033	0.189241	0.20098	0.151672	0.165322	0.178644	0.182834	0.197472	0.254592	0.22072	0.203144	0.161458	0.211674	0.284211	0.154093	0.140618	0.188468	0.191397	0.19819	0.224323	0.185213	0.190218	0.173326	0.159406	0.198075	0.199007	0.219053	0.187636	0.204023	0.182055	0.233797	0.220739	0.177532	0.162212	0.210017	0.233936
458	0.203045	0.235941	0.167306	0.156167	0.282577	0.182576	0.169643	0.228555	0.175405	0.177541	0.218918	0.164076	0.144542	0.204203	0.192034	0.20274	0.154137	0.162958	0.179459	0.18534	0.202083	0.256448	0.227174	0.204155	0.163622	0.212483	0.288828	0.155167	0.142026	0.187967	0.194462	0.202297	0.230744	0.184155	0.192488	0.17902	0.155963	0.198958	0.19801	0.228322	0.188492	0.204026	0.183066	0.234872	0.224479	0.179744	0.165528	0.208906	0.241809
460	0.206598	0.241014	0.169805	0.156719	0.293063	0.184931	0.173118	0.237952	0.183037	0.181241	0.224398	0.170251	0.146275	0.199226	0.194827	0.211063	0.156706	0.166664	0.186995	0.186756	0.207556	0.261107	0.228936	0.207735	0.166555	0.215158	0.291619	0.156046	0.145429	0.1907	0.19662	0.203448	0.239773	0.194658	0.196238	0.18022	0.15461	0.19997	0.205085	0.233619	0.192574	0.204976	0.184808	0.243375	0.228922	0.183812	0.167704	0.217064	0.246371
462	0.203731	0.247489	0.172301	0.154373	0.287908	0.188015	0.174263	0.238028	0.186718	0.182527	0.226043	0.17045	0.147974	0.198743	0.199548	0.217528	0.157057	0.171038	0.191557	0.187075	0.205463	0.26465	0.231793	0.209808	0.170586	0.221081	0.297283	0.157476	0.150695	0.191707	0.195355	0.206532	0.244164	0.199447	0.195601	0.180721	0.158768	0.204249	0.205908	0.237331	0.192164	0.209203	0.187594	0.245491	0.228227	0.185963	0.168025	0.219501	0.248881
464	0.213214	0.248166	0.174166	0.154624	0.288705	0.190252	0.171158	0.237403	0.187763	0.183458	0.227535	0.172857	0.155992	0.203159	0.198492	0.220181	0.154097	0.174655	0.198202	0.183002	0.206292	0.26538	0.230935	0.20831	0.169405	0.218703	0.298177	0.162876	0.150048	0.19525	0.198819	0.211951	0.24489	0.199642	0.186657	0.183633	0.160607	0.204137	0.209229	0.23945	0.19661	0.21041	0.189879	0.252106	0.233511	0.188197	0.169084	0.212879	0.248169
466	0.213707	0.246546	0.172075	0.152087	0.292281	0.193485	0.17307	0.239879	0.189273	0.188965	0.230706	0.173382	0.15061	0.204206	0.197678	0.219301	0.151619	0.178912	0.2042	0.186461	0.207474	0.26926	0.228018	0.207198	0.17331	0.219083	0.300063	0.164548	0.150279	0.198772	0.205064	0.212562	0.248914	0.202746	0.182888	0.177703	0.160578	0.209548	0.206536	0.239566	0.203446	0.216212	0.194159	0.247637	0.234849	0.187466	0.167647	0.212578	0.245676
468	0.210999	0.242722	0.177163	0.155676	0.298297	0.198296	0.173301	0.24456	0.193048	0.194287	0.234181	0.17308	0.152801	0.199965	0.202235	0.225583	0.15396	0.179154	0.209338	0.188933	0.206085	0.274936	0.226284	0.211351	0.17436	0.225249	0.302939	0.169192	0.15404	0.200696	0.205212	0.21531	0.246751	0.207733	0.188911	0.175707	0.162968	0.211714	0.209782	0.238674	0.211368	0.221888	0.197135	0.252014	0.235931	0.186653	0.172443	0.212073	0.245614
470	0.213911	0.248654	0.180898	0.157249	0.297515	0.200052	0.175642	0.239151	0.19109	0.195392	0.233501	0.170028	0.152766	0.20913	0.204044	0.224479	0.1506	0.180122	0.212026	0.192205	0.209289	0.276823	0.232937	0.212871	0.173501	0.227494	0.309126	0.170937	0.157612	0.20456	0.205308	0.221509	0.242594	0.204629	0.195996	0.171444	0.169181	0.209873	0.211519	0.234717	0.215225	0.22786	0.200438	0.251893	0.232556	0.187251	0.16908	0.209029	0.247899
472	0.217814	0.247712	0.178323	0.16239	0.303381	0.202731	0.178983	0.241714	0.191498	0.199728	0.237012	0.170613	0.155801	0.21391	0.205251	0.228633	0.151534	0.180962	0.215801	0.194065	0.216737	0.281427	0.233958	0.21575	0.173961	0.222591	0.310713	0.172435	0.157073	0.211024	0.20996	0.22871	0.243369	0.203935	0.198115	0.180442	0.169649	0.210027	0.213002	0.233345	0.218685	0.226815	0.203328	0.255302	0.235361	0.186831	0.173038	0.218035	0.249885
474	0.221619	0.253212	0.1798	0.164778	0.309674	0.204306	0.184858	0.249472	0.189479	0.20541	0.240097	0.17714	0.157325	0.21674	0.208555	0.232498	0.157291	0.179137	0.220528	0.204064	0.223371	0.286947	0.240334	0.222587	0.179679	0.22636	0.320842	0.169118	0.162439	0.215497	0.214103	0.230485	0.248113	0.210298	0.20881	0.180051	0.170171	0.215981	0.21726	0.236398	0.220693	0.23114	0.209592	0.256933	0.245089	0.186574	0.175093	0.224226	0.256585
476	0.227076	0.252322	0.18854	0.170009	0.319345	0.203891	0.189911	0.258067	0.190471	0.208869	0.244996	0.184576	0.160339	0.230157	0.209657	0.237506	0.158809	0.181447	0.225731	0.208282	0.2258	0.288088	0.245244	0.229833	0.183387	0.233689	0.331516	0.169583	0.168079	0.215456	0.217689	0.23366	0.253379	0.21556	0.214019	0.193868	0.178632	0.219412	0.2229	0.236656	0.221722	0.230605	0.207466	0.263568	0.247387	0.18823	0.176828	0.228915	0.263696
478	0.229221	0.254433	0.188172	0.172857	0.318792	0.20593	0.195176	0.257444	0.191047	0.207024	0.251351	0.186082	0.160505	0.236019	0.208422	0.241172	0.158703	0.188139	0.225539	0.210874	0.229919	0.292629	0.248144	0.231427	0.185872	0.239707	0.338387	0.168781	0.167861	0.21535	0.223581	0.23768	0.25842	0.222636	0.213971	0.194796	0.179042	0.223018	0.2265	0.239234	0.217965	0.234581	0.210138	0.265635	0.251752	0.18876	0.179437	0.235231	0.266688
480	0.235885	0.252794	0.194557	0.172107	0.320989	0.208674	0.20044	0.261433	0.19222	0.208689	0.25733	0.192326	0.16171	0.23706	0.215515	0.251208	0.165474	0.188351	0.232642	0.215341	0.226296	0.291404	0.250687	0.230961	0.193003	0.245258	0.344045	0.17155	0.168101	0.218389	0.230922	0.2417	0.261025	0.22839	0.217814	0.20364	0.1778	0.228275	0.229026	0.247189	0.213484	0.234572	0.212485	0.269481	0.252526	0.190042	0.187983	0.239821	0.267534
482	0.231748	0.256965	0.201753	0.175294	0.32909	0.210132	0.200169	0.271217	0.191012	0.206037	0.258751	0.196999	0.155621	0.238039	0.219264	0.254399	0.168695	0.189743	0.232365	0.214729	0.222482	0.289637	0.256663	0.232071	0.193786	0.255323	0.346042	0.174726	0.167151	0.216972	0.229618	0.237651	0.263299	0.232502	0.214908	0.203301	0.179549	0.233608	0.232031	0.254738	0.216291	0.235586	0.213518	0.274764	0.257051	0.189685	0.187617	0.237061	0.269331
484	0.238412	0.253634	0.208154	0.180593	0.33446	0.21142	0.200491	0.270057	0.198057	0.210027	0.268378	0.198194	0.154534	0.238117	0.227114	0.258075	0.170533	0.187723	0.229355	0.214749	0.226282	0.292588	0.25912	0.234949	0.194602	0.260839	0.349237	0.174849	0.168419	0.219457	0.228346	0.242844	0.271353	0.238198	0.217343	0.210403	0.183963	0.232583	0.235727	0.258214	0.219451	0.235832	0.209683	0.276081	0.251936	0.193295	0.188766	0.239528	0.270419
486	0.237491	0.262195	0.207178	0.17873	0.330188	0.21218	0.197957	0.272115	0.19968	0.208655	0.274314	0.194239	0.156154	0.230186	0.22372	0.26196	0.170147	0.186433	0.231565	0.2185	0.226048	0.300291	0.258925	0.234139	0.194293	0.264678	0.350243	0.179295	0.16632	0.224034	0.2264	0.24553	0.27329	0.239235	0.219472	0.206611	0.180918	0.232255	0.238424	0.264757	0.223377	0.238153	0.214886	0.276752	0.255362	0.193559	0.191803	0.238623	0.273862
488	0.242681	0.265999	0.212134	0.182753	0.339809	0.218856	0.197916	0.277982	0.205291	0.217441	0.278978	0.198287	0.16154	0.236271	0.232473	0.268242	0.171498	0.191079	0.237434	0.219835	0.228728	0.307343	0.260573	0.242262	0.198738	0.263171	0.353886	0.181392	0.165873	0.224192	0.227871	0.246735	0.275547	0.236752	0.221492	0.209199	0.18553	0.235455	0.241113	0.271979	0.229556	0.240657	0.218724	0.280491	0.261497	0.197636	0.187674	0.242829	0.282351
490	0.243649	0.27419	0.214562	0.185626	0.348314	0.215207	0.194306	0.282952	0.21026	0.219315	0.283998	0.20275	0.164541	0.241766	0.229243	0.265308	0.169613	0.196721	0.232487	0.223797	0.240572	0.318454	0.267242	0.251067	0.200433	0.271841	0.367716	0.184874	0.169108	0.228418	0.230002	0.250246	0.284477	0.242997	0.222409	0.210884	0.191464	0.23751	0.245237	0.27673	0.236354	0.245945	0.224769	0.286705	0.270951	0.20306	0.191903	0.24684	0.287262
492	0.249337	0.281171	0.212465	0.182027	0.359486	0.216305	0.195979	0.286286	0.212212	0.218066	0.289783	0.20749	0.170679	0.24212	0.23024	0.265203	0.170136	0.202087	0.233662	0.230384	0.248457	0.325193	0.263566	0.254527	0.20282	0.27082	0.38266	0.183913	0.173248	0.232508	0.234276	0.251198	0.284512	0.245395	0.225392	0.211792	0.188719	0.237418	0.243467	0.279245	0.24079	0.247567	0.22977	0.28936	0.271758	0.205161	0.196635	0.247831	0.288731
494	0.257739	0.29134	0.212142	0.180747	0.367464	0.223946	0.200309	0.291879	0.212912	0.217487	0.287792	0.212619	0.177651	0.242066	0.229831	0.266196	0.173655	0.208218	0.234867	0.23243	0.251709	0.339894	0.266415	0.255161	0.199819	0.275167	0.393357	0.190268	0.173878	0.232428	0.237371	0.255431	0.283631	0.240704	0.224611	0.213098	0.193932	0.244903	0.241829	0.281231	0.245614	0.252352	0.237053	0.296368	0.277757	0.200687	0.198257	0.249387	0.294213
496	0.246196	0.29476	0.217225	0.187238	0.382453	0.226183	0.204939	0.291738	0.216034	0.217612	0.292677	0.214681	0.179229	0.249878	0.242949	0.270614	0.180458	0.212165	0.234443	0.22828	0.252351	0.344251	0.266282	0.258887	0.201051	0.279435	0.406606	0.189379	0.179399	0.231622	0.24058	0.254794	0.284749	0.241333	0.22882	0.218545	0.195165	0.251184	0.244978	0.287753	0.251839	0.255191	0.238263	0.298591	0.279111	0.206946	0.197173	0.262111	0.301339
498	0.257894	0.303069	0.217028	0.187938	0.396596	0.229357	0.203715	0.300004	0.218862	0.223002	0.292672	0.219091	0.18025	0.252504	0.244085	0.275403	0.184844	0.212316	0.232724	0.232867	0.252581	0.343306	0.269399	0.256935	0.201829	0.286233	0.418083	0.191154	0.18326	0.238412	0.239633	0.260203	0.292631	0.246458	0.233877	0.22336	0.198185	0.256725	0.249423	0.287323	0.255878	0.256288	0.23838	0.302881	0.276084	0.209512	0.200931	0.259694	0.310363
500	0.261622	0.307984	0.218028	0.192703	0.410906	0.240399	0.210752	0.308736	0.222667	0.224626	0.295591	0.223834	0.182053	0.258483	0.249951	0.28029	0.191316	0.211037	0.239144	0.234047	0.25375	0.356254	0.274134	0.257355	0.200631	0.285052	0.42409	0.188835	0.186861	0.235218	0.239508	0.262317	0.295562	0.244423	0.234573	0.220495	0.200347	0.26698	0.25218	0.288565	0.265636	0.260318	0.237964	0.305968	0.279122	0.208827	0.204954	0.265935	0.318173
502	0.263237	0.307453	0.220317	0.194883	0.413242	0.245722	0.217831	0.308252	0.226295	0.233236	0.293093	0.221246	0.185516	0.264411	0.25362	0.281286	0.195009	0.207437	0.250553	0.235083	0.252141	0.360527	0.280028	0.261162	0.201936	0.300427	0.437554	0.192078	0.185711	0.232756	0.24079	0.268284	0.303343	0.251381	0.239423	0.216906	0.208521	0.274884	0.26068	0.295521	0.275652	0.264078	0.235912	0.311362	0.284251	0.212789	0.208085	0.278929	0.329459
504	0.276805	0.303001	0.221993	0.199255	0.4166	0.245011	0.215585	0.311898	0.225604	0.233731	0.301648	0.217202	0.183741	0.267895	0.2564	0.286126	0.191743	0.210315	0.251587	0.237711	0.250822	0.362405	0.281325	0.264724	0.207716	0.301623	0.453828	0.193979	0.186439	0.236964	0.242076	0.269167	0.302095	0.251326	0.244621	0.212975	0.205842	0.273243	0.269235	0.296172	0.279874	0.266396	0.233652	0.31283	0.28729	0.220501	0.209794	0.290634	0.329702
506	0.268347	0.299707	0.219905	0.20008	0.422512	0.252001	0.221993	0.323417	0.231216	0.23586	0.300416	0.225162	0.185478	0.272529	0.252232	0.283845	0.189583	0.210059	0.259685	0.243363	0.253034	0.366543	0.290579	0.272432	0.211838	0.303033	0.470422	0.199838	0.191938	0.246837	0.246206	0.275068	0.303806	0.259511	0.246436	0.210548	0.206694	0.275376	0.268738	0.297007	0.279238	0.268792	0.237193	0.327813	0.288268	0.219383	0.213578	0.291343	0.338564
508	0.269323	0.298115	0.222655	0.201322	0.425682	0.249803	0.229943	0.320646	0.225742	0.228704	0.304968	0.226422	0.186524	0.273533	0.25549	0.284807	0.192194	0.212546	0.27013	0.245544	0.254626	0.373441	0.300179	0.276228	0.21404	0.30851	0.483805	0.202786	0.194994	0.246015	0.253934	0.279607	0.308625	0.261759	0.240816	0.211067	0.204125	0.28421	0.266327	0.306651	0.283764	0.269574	0.241042	0.332208	0.295771	0.218819	0.208787	0.292536	0.331141
510	0.280076	0.299063	0.222153	0.197701	0.42887	0.245892	0.230528	0.317613	0.22348	0.230622	0.308205	0.225851	0.187229	0.275903	0.255176	0.29458	0.18649	0.214696	0.269785	0.249767	0.252158	0.374576	0.302136	0.284007	0.218266	0.307754	0.489884	0.202358	0.193743	0.253857	0.259811	0.287103	0.306456	0.260658	0.239663	0.215029	0.204549	0.279911	0.263699	0.306839	0.282576	0.269238	0.241119	0.329414	0.30029	0.217146	0.210065	0.295209	0.332529
512	0.275025	0.305711	0.225111	0.201188	0.436588	0.246172	0.227393	0.318306	0.230633	0.234588	0.319543	0.229767	0.187917	0.275685	0.257236	0.302176	0.189933	0.215017	0.262437	0.248252	0.259585	0.380513	0.307747	0.296026	0.219641	0.302806	0.495756	0.199916	0.19881	0.263896	0.269497	0.297428	0.313957	0.260535	0.23753	0.222644	0.200489	0.278401	0.259735	0.308723	0.280317	0.275911	0.24399	0.330513	0.300897	0.219483	0.210704	0.295159	0.336969
514	0.284201	0.319589	0.231952	0.197026	0.448893	0.251145	0.230296	0.321019	0.234264	0.236462	0.320031	0.238368	0.187524	0.283742	0.261093	0.305126	0.194531	0.211461	0.26485	0.247929	0.256629	0.382077	0.314315	0.305013	0.223527	0.304637	0.502986	0.19474	0.202142	0.26885	0.274111	0.298184	0.324255	0.260659	0.239484	0.232069	0.201157	0.286012	0.262435	0.314942	0.279855	0.276894	0.251121	0.334	0.301857	0.217132	0.208323	0.295912	0.344586
516	0.284236	0.325935	0.233498	0.196693	0.461891	0.246428	0.232118	0.319892	0.2319	0.239346	0.32042	0.233143	0.188564	0.281046	0.264928	0.306877	0.193354	0.210999	0.265198	0.244486	0.258458	0.397969	0.314086	0.305219	0.225211	0.309757	0.506858	0.192825	0.204398	0.263098	0.275715	0.299798	0.321607	0.257377	0.242455	0.237297	0.20061	0.285578	0.26459	0.313676	0.278495	0.278486	0.251752	0.329032	0.31041	0.218694	0.20541	0.293314	0.344503
518	0.285725	0.335396	0.237662	0.19764	0.471273	0.247041	0.233023	0.324448	0.233616	0.246508	0.321668	0.232964	0.185782	0.279223	0.267011	0.314523	0.189898	0.205917	0.25875	0.240868	0.262385	0.4018	0.311046	0.310302	0.226865	0.304476	0.518633	0.193006	0.208921	0.26598	0.278462	0.301354	0.316552	0.254184	0.236117	0.23591	0.207559	0.28095	0.263119	0.316416	0.278233	0.280299	0.256294	0.336236	0.307914	0.22421	0.213688	0.304904	0.358813
520	0.285146	0.343122	0.2349	0.20138	0.481951	0.251203	0.237715	0.328029	0.234412	0.246499	0.32918	0.230188	0.187087	0.274926	0.269014	0.307895	0.193386	0.201735	0.258598	0.240478	0.265732	0.40317	0.308584	0.311585	0.228459	0.305835	0.532915	0.19618	0.210978	0.266853	0.278246	0.296459	0.325014	0.261676	0.236483	0.235457	0.210174	0.287614	0.271201	0.321066	0.277174	0.285964	0.264413	0.350195	0.310251	0.233032	0.210703	0.310175	0.365337
522	0.287417	0.347108	0.237329	0.20343	0.497697	0.256793	0.244393	0.331531	0.229403	0.244995	0.331442	0.230099	0.182632	0.27756	0.274112	0.316063	0.186518	0.206995	0.262157	0.24226	0.264551	0.413421	0.313743	0.310471	0.231183	0.311856	0.544447	0.20448	0.212174	0.264788	0.274818	0.293358	0.321501	0.265059	0.241157	0.232089	0.216308	0.287917	0.275971	0.319159	0.281319	0.28427	0.266407	0.36129	0.313778	0.231764	0.208036	0.311533	0.370829
524	0.296611	0.343345	0.234721	0.200962	0.513468	0.257087	0.248293	0.338598	0.228991	0.246189	0.334221	0.230194	0.18383	0.275504	0.279527	0.316915	0.188251	0.213277	0.260449	0.241771	0.270052	0.420546	0.313328	0.307569	0.233766	0.313623	0.556233	0.210885	0.211673	0.262175	0.279408	0.295554	0.321489	0.26847	0.237119	0.230301	0.216996	0.285894	0.274075	0.323229	0.287538	0.289355	0.264636	0.37584	0.314534	0.231934	0.214277	0.307077	0.381927
526	0.299098	0.352878	0.233944	0.199599	0.519883	0.262636	0.249198	0.339895	0.233985	0.247919	0.344872	0.235715	0.184194	0.286213	0.283074	0.326501	0.189963	0.213502	0.265066	0.249318	0.277139	0.428353	0.31793	0.306545	0.23729	0.314005	0.571996	0.216884	0.207077	0.266426	0.280701	0.293651	0.328265	0.271622	0.233057	0.226164	0.229052	0.290736	0.277316	0.32998	0.293416	0.290599	0.271566	0.38204	0.321966	0.230638	0.220085	0.317007	0.380332
528	0.298019	0.353344	0.230415	0.201443	0.531595	0.260687	0.250994	0.344068	0.239889	0.245442	0.348244	0.239332	0.187959	0.292019	0.281657	0.326048	0.189635	0.220765	0.266389	0.255856	0.277595	0.438475	0.325862	0.306	0.24225	0.316682	0.591924	0.21603	0.205805	0.264709	0.276684	0.294412	0.333047	0.279431	0.244383	0.229966	0.224705	0.293828	0.290336	0.330189	0.291009	0.299272	0.273796	0.389358	0.331374	0.233068	0.219798	0.319658	0.385111
530	0.305101	0.354247	0.233181	0.197892	0.554626	0.264557	0.248831	0.350372	0.247436	0.248682	0.349133	0.246117	0.190751	0.295621	0.291952	0.337569	0.194772	0.229742	0.272558	0.25892	0.282933	0.452598	0.332359	0.317055	0.245187	0.324516	0.616111	0.219541	0.211934	0.271093	0.282208	0.298065	0.331788	0.281525	0.250673	0.233584	0.227705	0.29335	0.289172	0.334795	0.299577	0.297576	0.274587	0.398545	0.339852	0.230713	0.221682	0.32137	0.390688
532	0.306541	0.359217	0.235772	0.202096	0.570156	0.269149	0.249753	0.355225	0.247855	0.256023	0.356784	0.252881	0.197397	0.302061	0.289501	0.335916	0.199811	0.231705	0.284536	0.269581	0.293117	0.46318	0.339705	0.319234	0.249706	0.331519	0.651258	0.213398	0.218961	0.280948	0.289321	0.308219	0.336449	0.291554	0.256271	0.243034	0.226612	0.296977	0.29388	0.345657	0.304401	0.308706	0.283467	0.405344	0.340087	0.238499	0.227229	0.331952	0.398006
534	0.32235	0.363756	0.242037	0.207903	0.592178	0.272807	0.253943	0.360522	0.246291	0.257112	0.362742	0.248406	0.199077	0.306331	0.285637	0.345048	0.197266	0.227011	0.292777	0.276072	0.294152	0.477248	0.348818	0.328846	0.252581	0.341051	0.67804	0.213338	0.223658	0.28351	0.29276	0.316488	0.342371	0.297773	0.264358	0.242246	0.231046	0.303412	0.296517	0.35326	0.305655	0.312292	0.28971	0.406958	0.347082	0.243341	0.231493	0.343709	0.403439
536	0.332619	0.372673	0.245698	0.213948	0.617539	0.278572	0.248309	0.370612	0.247465	0.259844	0.36471	0.254721	0.204316	0.306245	0.287657	0.352279	0.203284	0.231187	0.297523	0.271939	0.296275	0.48478	0.362279	0.34555	0.255987	0.344874	0.714319	0.207973	0.228468	0.287147	0.302869	0.328603	0.354658	0.304095	0.26979	0.245626	0.231504	0.306584	0.303532	0.355671	0.308157	0.317085	0.295268	0.422447	0.345896	0.248213	0.234458	0.349514	0.426697
538	0.324266	0.389729	0.250332	0.216919	0.645378	0.29094	0.256243	0.379552	0.25033	0.267348	0.37948	0.260103	0.205316	0.316117	0.296024	0.364689	0.209914	0.237213	0.306592	0.277318	0.304769	0.499253	0.369193	0.358686	0.258497	0.363592	0.742108	0.217392	0.23865	0.298591	0.31319	0.336203	0.364027	0.309316	0.280108	0.253522	0.239871	0.30866	0.309126	0.368603	0.322906	0.32596	0.305136	0.438863	0.35477	0.248999	0.247799	0.362012	0.439708
540	0.337629	0.395456	0.258069	0.225274	0.660778	0.291579	0.26021	0.389058	0.247758	0.268307	0.385529	0.262846	0.204068	0.327216	0.294873	0.377792	0.207872	0.242403	0.312507	0.276451	0.303399	0.506804	0.373319	0.357978	0.258673	0.376293	0.763004	0.220048	0.233156	0.303218	0.318886	0.341139	0.375132	0.311992	0.280893	0.256228	0.243334	0.316471	0.31495	0.377956	0.325503	0.329974	0.309271	0.441945	0.350104	0.254895	0.251206	0.366734	0.454837
542	0.352693	0.406903	0.262564	0.224962	0.69061	0.300143	0.267211	0.405008	0.262183	0.268537	0.388886	0.26225	0.203676	0.339494	0.305074	0.389632	0.210812	0.246815	0.310408	0.280485	0.304067	0.51885	0.376032	0.369289	0.26364	0.379084	0.789712	0.230661	0.235727	0.304089	0.316712	0.343365	0.388958	0.309768	0.28131	0.260554	0.250898	0.319778	0.317258	0.382382	0.328342	0.333889	0.306685	0.45136	0.362314	0.258397	0.258011	0.372281	0.469435
544	0.349538	0.416146	0.268467	0.235393	0.715469	0.307125	0.269873	0.41109	0.270288	0.279692	0.399163	0.272236	0.20561	0.347899	0.315859	0.395638	0.213432	0.263574	0.316916	0.288351	0.315155	0.536107	0.37963	0.382414	0.266923	0.382424	0.823557	0.238329	0.244218	0.312527	0.329913	0.35138	0.397534	0.320062	0.282797	0.267053	0.257551	0.32712	0.323014	0.39516	0.33073	0.340724	0.312376	0.466162	0.371707	0.263605	0.257021	0.382769	0.489372
546	0.361321	0.421222	0.278465	0.235674	0.736959	0.310325	0.282913	0.423487	0.27533	0.283789	0.407199	0.272318	0.20911	0.34682	0.328615	0.397585	0.212037	0.271037	0.317304	0.301511	0.320546	0.552426	0.377595	0.385246	0.265137	0.392293	0.850802	0.244526	0.24651	0.324549	0.329539	0.357387	0.402986	0.322455	0.282865	0.271596	0.259119	0.333368	0.329141	0.402332	0.340299	0.349584	0.310652	0.472388	0.373966	0.268484	0.260244	0.387057	0.4929
548	0.367425	0.421731	0.287275	0.239996	0.765034	0.311532	0.284799	0.428908	0.278786	0.288851	0.415325	0.282012	0.211305	0.350688	0.333419	0.394164	0.218863	0.270332	0.319242	0.309187	0.324511	0.570028	0.379114	0.394878	0.266334	0.386444	0.879058	0.246436	0.245356	0.328667	0.336594	0.364698	0.408064	0.327356	0.281405	0.272217	0.258151	0.344391	0.334779	0.399075	0.342762	0.345335	0.304717	0.477115	0.376981	0.271962	0.256586	0.394168	0.505428
550	0.367108	0.429588	0.295108	0.239968	0.793448	0.31999	0.292247	0.434874	0.279483	0.292799	0.430519	0.284369	0.213807	0.35086	0.337742	0.393249	0.22775	0.269562	0.323974	0.317173	0.33088	0.588017	0.382174	0.406562	0.269007	0.383581	0.907711	0.247882	0.254798	0.331719	0.342096	0.373584	0.414399	0.330377	0.283182	0.278348	0.261283	0.348153	0.343934	0.406575	0.346	0.355778	0.304033	0.49513	0.384923	0.267495	0.263556	0.402892	0.517354
552	0.376146	0.43884	0.303598	0.241953	0.81938	0.322093	0.294252	0.436416	0.27166	0.291273	0.443827	0.293713	0.216965	0.353519	0.341528	0.39702	0.230142	0.271506	0.327476	0.317289	0.33702	0.597866	0.390519	0.414427	0.270446	0.396452	0.924846	0.25015	0.252767	0.34623	0.349565	0.379826	0.422834	0.333496	0.287865	0.275251	0.266742	0.360214	0.351989	0.414589	0.350383	0.35538	0.311711	0.499624	0.389651	0.269059	0.266561	0.408326	0.533623
554	0.379739	0.443059	0.299953	0.238071	0.83471	0.325447	0.298233	0.449641	0.27711	0.291444	0.451507	0.2976	0.22258	0.361452	0.347368	0.408339	0.237555	0.264803	0.331508	0.317138	0.337718	0.608034	0.394398	0.421799	0.274275	0.413447	0.940661	0.246733	0.254148	0.356352	0.34841	0.384299	0.431596	0.333739	0.296407	0.279613	0.269794	0.362382	0.352072	0.419786	0.363092	0.360791	0.313764	0.504874	0.39477	0.277334	0.269966	0.419481	0.536801
556	0.392351	0.446683	0.30255	0.246645	0.860048	0.335284	0.300566	0.459286	0.278956	0.298538	0.461718	0.3071	0.222032	0.374771	0.349974	0.415011	0.247099	0.265871	0.342556	0.318808	0.341861	0.619168	0.401144	0.428489	0.281924	0.414619	0.946945	0.247877	0.255451	0.353863	0.351025	0.393607	0.450076	0.337884	0.305648	0.284516	0.276618	0.363935	0.351587	0.434152	0.36938	0.367386	0.31767	0.52452	0.408029	0.27773	0.271029	0.432897	0.560764
558	0.394504	0.444325	0.302509	0.246346	0.87001	0.341058	0.306416	0.463605	0.280074	0.29324	0.463453	0.301906	0.222205	0.378971	0.355443	0.427081	0.244688	0.268904	0.343879	0.318059	0.345024	0.638976	0.412548	0.42966	0.28655	0.428385	0.952243	0.248691	0.253014	0.365408	0.358886	0.39592	0.453206	0.338023	0.306215	0.284054	0.287115	0.36505	0.349217	0.445175	0.371725	0.37411	0.318713	0.529266	0.411247	0.279886	0.272597	0.442572	0.571296
560	0.40452	0.448848	0.29937	0.253812	0.884569	0.351077	0.312103	0.472895	0.289705	0.299953	0.460558	0.303547	0.223509	0.382427	0.368158	0.430479	0.245235	0.267246	0.341718	0.318838	0.346021	0.66276	0.424475	0.431032	0.294275	0.432788	0.960537	0.250974	0.25301	0.370655	0.36424	0.408935	0.456167	0.350033	0.316772	0.284848	0.285921	0.37126	0.350343	0.454034	0.378682	0.378867	0.327632	0.536324	0.42463	0.29033	0.268919	0.455303	0.585817
562	0.404182	0.458924	0.299341	0.264216	0.877863	0.356523	0.313298	0.479783	0.293568	0.305644	0.461894	0.302696	0.229197	0.387228	0.374812	0.440235	0.244947	0.272898	0.34712	0.322478	0.34521	0.6947	0.433723	0.435581	0.297967	0.427241	0.955672	0.250952	0.257396	0.363	0.37091	0.414426	0.456026	0.360558	0.317605	0.289964	0.285617	0.37684	0.353069	0.468588	0.391564	0.391038	0.329141	0.560068	0.427035	0.290216	0.273899	0.463837	0.600382
564	0.41297	0.470577	0.300331	0.264557	0.897595	0.360182	0.321483	0.484504	0.297939	0.311478	0.462635	0.305473	0.22916	0.391744	0.377518	0.444087	0.249662	0.276709	0.345973	0.322353	0.347284	0.720061	0.452921	0.436425	0.300042	0.42307	0.95627	0.255513	0.25598	0.364762	0.377128	0.420487	0.463452	0.367256	0.32428	0.287319	0.287403	0.378197	0.362701	0.478273	0.400651	0.39693	0.330167	0.578932	0.428168	0.285259	0.27662	0.472807	0.622065
566	0.420173	0.488195	0.308442	0.265079	0.909425	0.370005	0.334374	0.489781	0.297801	0.314343	0.469806	0.302307	0.229686	0.397008	0.380426	0.461438	0.253975	0.281053	0.343654	0.326657	0.35306	0.746585	0.467363	0.442197	0.304293	0.446829	0.960611	0.256535	0.260927	0.372731	0.384144	0.42871	0.467979	0.374519	0.336054	0.288044	0.28898	0.391393	0.369068	0.48293	0.408262	0.404785	0.33374	0.589806	0.436131	0.290191	0.283771	0.482609	0.641504
568	0.427298	0.49762	0.312584	0.26964	0.915168	0.369156	0.339139	0.508741	0.301219	0.325128	0.487613	0.305254	0.233527	0.405446	0.385518	0.474375	0.257127	0.276888	0.353302	0.331593	0.356711	0.764105	0.480661	0.465203	0.305772	0.454042	0.958544	0.258404	0.267097	0.369689	0.384422	0.440686	0.478261	0.385887	0.344765	0.289802	0.293009	0.400281	0.374271	0.49127	0.423737	0.409382	0.344157	0.614705	0.439077	0.294529	0.290019	0.489501	0.657789
570	0.441165	0.513514	0.319682	0.274781	0.908682	0.365617	0.34341	0.521029	0.298613	0.32672	0.500744	0.312621	0.232397	0.417637	0.385717	0.485125	0.261515	0.285247	0.360412	0.333442	0.361339	0.784027	0.493137	0.478923	0.305624	0.470111	0.950988	0.25943	0.268611	0.369999	0.388917	0.447428	0.487495	0.38526	0.342798	0.291259	0.303429	0.40792	0.382072	0.50014	0.428892	0.411931	0.346064	0.646251	0.442916	0.293955	0.294493	0.502067	0.679785
572	0.442641	0.517595	0.318852	0.270004	0.927261	0.367438	0.349696	0.538563	0.299899	0.330255	0.518273	0.32152	0.234891	0.423992	0.38938	0.498159	0.268237	0.285064	0.370828	0.337136	0.36675	0.808967	0.50459	0.49626	0.304339	0.483169	0.947823	0.262218	0.275158	0.377934	0.39402	0.459529	0.503976	0.38153	0.348267	0.290593	0.30994	0.411064	0.381258	0.508741	0.429875	0.418547	0.348137	0.65689	0.455559	0.300178	0.289713	0.51295	0.698415
574	0.448539	0.533383	0.333215	0.276105	0.922344	0.375502	0.354316	0.545961	0.297791	0.328474	0.546066	0.321962	0.23898	0.430943	0.398432	0.516283	0.269066	0.285383	0.386319	0.346992	0.37154	0.832695	0.511485	0.51055	0.310135	0.493663	0.953232	0.262147	0.277494	0.384071	0.401747	0.467879	0.514426	0.382516	0.347934	0.297232	0.311767	0.421389	0.392396	0.51412	0.432916	0.424438	0.349014	0.683674	0.464608	0.302709	0.291461	0.526166	0.728616
576	0.455937	0.547364	0.327838	0.276236	0.919921	0.374267	0.355026	0.55911	0.307041	0.338532	0.56019	0.332455	0.24623	0.438035	0.407499	0.524115	0.263462	0.294637	0.399082	0.347191	0.378884	0.863807	0.529389	0.524863	0.319978	0.487378	0.944825	0.264919	0.283983	0.389275	0.415797	0.473113	0.515369	0.390207	0.336818	0.301822	0.312573	0.430004	0.400551	0.53338	0.438482	0.430449	0.358149	0.69741	0.474565	0.305309	0.294709	0.533281	0.752592
578	0.466189	0.569322	0.333239	0.281616	0.911796	0.383858	0.352182	0.566726	0.306099	0.344102	0.576142	0.338495	0.250265	0.444497	0.407595	0.542675	0.260303	0.307849	0.405994	0.356256	0.380533	0.89905	0.535542	0.52651	0.322523	0.505618	0.949103	0.265872	0.283128	0.399949	0.425305	0.489137	0.534621	0.389471	0.336128	0.304524	0.314176	0.4341	0.408385	0.545278	0.442916	0.444799	0.36185	0.711282	0.484384	0.308315	0.293478	0.543547	0.784157
580	0.480382	0.583773	0.340149	0.279097	0.91895	0.392836	0.360053	0.574568	0.313021	0.346879	0.60892	0.337223	0.262693	0.458522	0.414313	0.560273	0.256002	0.312039	0.402452	0.365345	0.390592	0.92268	0.534603	0.535154	0.32608	0.513679	0.94571	0.272036	0.28665	0.4134	0.4317	0.493229	0.556483	0.406347	0.341027	0.309757	0.315534	0.440002	0.406262	0.55537	0.461772	0.452563	0.365597	0.721239	0.492468	0.313686	0.301049	0.547576	0.808593
582	0.48217	0.609953	0.348653	0.287106	0.91077	0.397094	0.370664	0.598369	0.313364	0.358441	0.635159	0.341007	0.264391	0.468666	0.425641	0.577404	0.259116	0.31534	0.406482	0.371336	0.390637	0.936386	0.545624	0.544932	0.332945	0.529976	0.947171	0.273877	0.284478	0.418586	0.441701	0.503747	0.569149	0.419817	0.345197	0.318401	0.31949	0.446955	0.413686	0.569592	0.474965	0.457398	0.371844	0.761105	0.505741	0.314365	0.307653	0.567299	0.843269
584	0.490351	0.630539	0.349812	0.287387	0.911884	0.39625	0.370438	0.615971	0.326981	0.359426	0.644634	0.352737	0.266118	0.478751	0.428328	0.584062	0.256516	0.319985	0.414464	0.382445	0.399348	0.953079	0.553436	0.555148	0.337218	0.544485	0.945469	0.277622	0.288531	0.423127	0.443131	0.520705	0.578441	0.435751	0.343384	0.323213	0.323342	0.457094	0.414561	0.581057	0.490495	0.462801	0.378298	0.787736	0.512819	0.321972	0.313396	0.58351	0.857838
586	0.503649	0.635108	0.358276	0.290818	0.900439	0.401469	0.371191	0.634007	0.333211	0.358247	0.672882	0.349351	0.267314	0.492148	0.441214	0.605038	0.261706	0.317041	0.406443	0.387999	0.394867	0.955523	0.558556	0.572461	0.333988	0.564391	0.956068	0.277895	0.287727	0.431294	0.449591	0.536575	0.595927	0.441519	0.350675	0.323496	0.333004	0.450265	0.414292	0.600251	0.504679	0.469227	0.385487	0.822374	0.518393	0.31982	0.316549	0.593572	0.877432
588	0.5051	0.656737	0.360339	0.290322	0.91699	0.40734	0.386381	0.658344	0.344956	0.354901	0.693754	0.350567	0.270151	0.507417	0.453661	0.614973	0.266972	0.315506	0.406734	0.393808	0.408903	0.949872	0.567166	0.59237	0.340581	0.573842	0.949804	0.280348	0.297291	0.434188	0.460055	0.548781	0.618971	0.452371	0.360835	0.332537	0.338347	0.457482	0.42371	0.62048	0.516944	0.475445	0.386927	0.862892	0.537417	0.328196	0.325245	0.611264	0.890929
590	0.517692	0.668586	0.35845	0.291109	0.908784	0.412233	0.384977	0.686924	0.346808	0.365452	0.695624	0.354767	0.269532	0.515122	0.455777	0.63132	0.273898	0.314643	0.418116	0.395084	0.408659	0.951659	0.585127	0.61033	0.340167	0.583017	0.955792	0.281764	0.299196	0.435856	0.459601	0.563071	0.634808	0.450239	0.356375	0.331428	0.341645	0.46147	0.436477	0.630292	0.51873	0.48479	0.387318	0.885907	0.545005	0.328282	0.325896	0.632766	0.904379
592	0.522932	0.672759	0.362428	0.294017	0.918304	0.427031	0.386235	0.695464	0.361711	0.362565	0.713013	0.354398	0.275814	0.529021	0.461252	0.644919	0.278994	0.315941	0.42324	0.399588	0.418843	0.953413	0.58558	0.619173	0.3511	0.588961	0.962554	0.285768	0.299148	0.450452	0.459785	0.58056	0.653047	0.468441	0.366071	0.337317	0.345038	0.462633	0.441465	0.636346	0.523965	0.496367	0.396993	0.896197	0.55014	0.330142	0.330531	0.648158	0.909698
594	0.523638	0.683407	0.367083	0.296934	0.923112	0.440672	0.397889	0.723824	0.364391	0.37448	0.736387	0.358743	0.276582	0.541613	0.466819	0.669817	0.286101	0.324305	0.426358	0.398724	0.42474	0.956114	0.603232	0.646142	0.354272	0.592502	0.955493	0.285954	0.303698	0.455786	0.471128	0.591486	0.679544	0.482532	0.375675	0.339752	0.353299	0.472867	0.4449	0.662318	0.541422	0.505172	0.403778	0.909613	0.563308	0.332183	0.336139	0.667281	0.919135
596	0.541833	0.699851	0.368409	0.298033	0.932368	0.446619	0.401826	0.746837	0.35965	0.376806	0.766634	0.366902	0.277376	0.553248	0.465032	0.685445	0.294656	0.328327	0.434434	0.413506	0.434364	0.948693	0.61388	0.661722	0.361295	0.605379	0.947317	0.292845	0.306686	0.462536	0.483923	0.606698	0.706267	0.487226	0.376426	0.347301	0.357716	0.49114	0.452235	0.663996	0.559501	0.513331	0.402554	0.922047	0.572612	0.34209	0.334655	0.690153	0.911768
598	0.552493	0.719908	0.377142	0.30113	0.925993	0.455524	0.403547	0.775234	0.367401	0.379861	0.78658	0.38293	0.279101	0.560828	0.477943	0.699337	0.30189	0.337501	0.445219	0.412683	0.432581	0.948064	0.630444	0.671904	0.367566	0.622842	0.951006	0.298762	0.306911	0.471745	0.486448	0.615066	0.708886	0.501711	0.375544	0.346748	0.358148	0.497593	0.452232	0.675433	0.569493	0.520342	0.403136	0.918697	0.569018	0.340853	0.337245	0.707934	0.91998
600	0.549958	0.744088	0.388042	0.304302	0.931446	0.46544	0.418702	0.789096	0.370424	0.384889	0.828576	0.388272	0.28187	0.575986	0.49747	0.719837	0.296665	0.342916	0.462612	0.420405	0.443761	0.959898	0.646708	0.685813	0.377474	0.645226	0.945566	0.29828	0.314513	0.490803	0.500614	0.637536	0.735714	0.511197	0.385892	0.356095	0.361596	0.49796	0.452253	0.702461	0.581304	0.528701	0.410256	0.933466	0.576832	0.345194	0.340689	0.734707	0.913551
602	0.562569	0.757915	0.393454	0.302134	0.921866	0.466757	0.427379	0.814112	0.368161	0.395779	0.84646	0.390199	0.28531	0.589662	0.503938	0.744417	0.295128	0.346634	0.476247	0.426363	0.447083	0.957052	0.671405	0.707677	0.376988	0.663839	0.943414	0.299686	0.325245	0.497593	0.515121	0.652024	0.753595	0.508257	0.381589	0.354368	0.36054	0.524512	0.463944	0.72767	0.595936	0.530996	0.40946	0.9432	0.588982	0.349461	0.34476	0.763295	0.908254
604	0.570387	0.789862	0.39612	0.310098	0.923376	0.469197	0.437413	0.820873	0.367365	0.401572	0.880878	0.389771	0.286205	0.60495	0.515099	0.775499	0.295561	0.347937	0.484397	0.431127	0.459735	0.966336	0.683104	0.725044	0.376193	0.688332	0.948245	0.302346	0.327309	0.509604	0.52149	0.674136	0.771125	0.508873	0.38027	0.357775	0.364309	0.530761	0.475743	0.741509	0.609516	0.547306	0.412874	0.940206	0.607302	0.348944	0.349623	0.785074	0.908674
606	0.578584	0.82756	0.41039	0.324687	0.927161	0.482458	0.441447	0.836469	0.372522	0.399124	0.896547	0.395507	0.289154	0.624887	0.534612	0.788447	0.290394	0.351598	0.50232	0.427069	0.46499	0.971354	0.693082	0.751529	0.37865	0.701352	0.949603	0.30715	0.329207	0.515731	0.520518	0.685899	0.781814	0.524118	0.392391	0.361681	0.362234	0.536371	0.484334	0.757097	0.619898	0.562504	0.409965	0.947228	0.627501	0.349194	0.354668	0.816888	0.921822
608	0.593177	0.84546	0.412329	0.325547	0.922972	0.490059	0.446837	0.846793	0.376529	0.411968	0.920981	0.396799	0.294142	0.638991	0.539747	0.817407	0.287564	0.353623	0.514941	0.431154	0.473764	0.970908	0.721259	0.773632	0.383917	0.725549	0.952164	0.307576	0.331874	0.531969	0.527028	0.711343	0.817359	0.532601	0.40109	0.366417	0.370416	0.55102	0.491939	0.776567	0.637798	0.579485	0.418477	0.95202	0.652111	0.346892	0.360463	0.851999	0.929183
610	0.597691	0.87662	0.418766	0.327852	0.930082	0.490283	0.448277	0.868149	0.383742	0.411167	0.923087	0.406861	0.298154	0.646368	0.545053	0.847967	0.301388	0.363272	0.520926	0.442531	0.47615	0.970894	0.746893	0.809841	0.387716	0.746999	0.956548	0.313275	0.335218	0.544889	0.544769	0.73454	0.831001	0.546677	0.418155	0.369079	0.38147	0.568635	0.507074	0.799888	0.666381	0.593849	0.427272	0.949223	0.668673	0.347965	0.36538	0.871862	0.935899
612	0.605419	0.90614	0.429432	0.328199	0.934234	0.498878	0.458123	0.887225	0.390092	0.4096	0.932959	0.415467	0.299324	0.665911	0.556751	0.873613	0.306262	0.37609	0.526433	0.451771	0.480126	0.974565	0.767391	0.843631	0.393185	0.77506	0.950481	0.316301	0.338844	0.554844	0.556592	0.756706	0.843567	0.563067	0.42833	0.377671	0.391221	0.570577	0.517552	0.819188	0.693565	0.610371	0.431558	0.94782	0.68931	0.349763	0.370885	0.887046	0.946878
614	0.621512	0.914071	0.439363	0.330395	0.935495	0.514395	0.463512	0.911276	0.388305	0.408376	0.931831	0.430519	0.306046	0.69044	0.567309	0.883568	0.313596	0.379961	0.535922	0.456918	0.4745	0.966356	0.789677	0.869532	0.401635	0.797328	0.945944	0.32095	0.342368	0.572649	0.576411	0.773224	0.877675	0.573758	0.436365	0.382379	0.398679	0.582683	0.525706	0.836391	0.705871	0.621549	0.438694	0.952957	0.698421	0.354272	0.380521	0.916005	0.960533
616	0.630787	0.923388	0.441311	0.324641	0.934999	0.523765	0.468094	0.92542	0.398052	0.422426	0.93627	0.436694	0.312196	0.712467	0.577535	0.923655	0.317257	0.390129	0.545434	0.469974	0.47976	0.971623	0.818509	0.893944	0.405523	0.836721	0.953791	0.325169	0.347529	0.583486	0.592274	0.798058	0.908748	0.595746	0.452298	0.391398	0.412382	0.593584	0.53391	0.865622	0.731638	0.625766	0.451159	0.963251	0.70521	0.361724	0.389078	0.941286	0.959071
618	0.638666	0.930075	0.448698	0.331759	0.949761	0.526445	0.479127	0.934944	0.397748	0.42673	0.92932	0.441606	0.316503	0.74034	0.596696	0.950372	0.328445	0.393118	0.55429	0.478074	0.482224	0.965764	0.84263	0.917904	0.404932	0.85885	0.949043	0.326476	0.349462	0.598715	0.605759	0.819963	0.922824	0.602641	0.453777	0.398091	0.414263	0.608034	0.54768	0.882014	0.757642	0.638299	0.457566	0.975943	0.714348	0.367765	0.387407	0.951302	0.951404
620	0.648859	0.928429	0.45251	0.337962	0.945958	0.545036	0.481282	0.937063	0.401261	0.432785	0.930552	0.44037	0.319162	0.772454	0.618778	0.961644	0.328438	0.390761	0.567807	0.474506	0.484921	0.954718	0.855305	0.925542	0.410146	0.868475	0.955061	0.329334	0.347994	0.611518	0.610082	0.833669	0.931167	0.620266	0.450173	0.400959	0.41641	0.625909	0.552024	0.891741	0.776891	0.654324	0.458189	0.969807	0.72981	0.367916	0.390099	0.961353	0.955599
622	0.652389	0.940519	0.456377	0.349747	0.959128	0.564365	0.485085	0.926319	0.403062	0.446158	0.929379	0.448163	0.316622	0.802461	0.638182	0.963825	0.330329	0.394587	0.57752	0.480948	0.497574	0.953787	0.887006	0.940904	0.406893	0.893171	0.960309	0.330566	0.348226	0.626099	0.615969	0.85384	0.950865	0.630754	0.455557	0.405504	0.419114	0.638266	0.563369	0.900773	0.793914	0.678813	0.463987	0.973809	0.740196	0.374623	0.392018	0.962944	0.94956
624	0.652918	0.952939	0.46586	0.355381	0.954999	0.572894	0.486552	0.935319	0.416104	0.458606	0.940053	0.455693	0.322394	0.826349	0.65221	0.969086	0.338708	0.396265	0.590509	0.489973	0.516253	0.957115	0.913149	0.942887	0.411195	0.916572	0.956025	0.337826	0.352505	0.648443	0.619301	0.882082	0.945856	0.650564	0.464492	0.405284	0.418975	0.65547	0.566575	0.914551	0.827645	0.694541	0.467189	0.98053	0.772269	0.380792	0.398558	0.961805	0.944915
626	0.672507	0.950057	0.473943	0.35983	0.958332	0.584302	0.502982	0.944607	0.419924	0.474076	0.930284	0.468425	0.324942	0.834097	0.660188	0.969427	0.342978	0.392547	0.60249	0.494053	0.528662	0.964143	0.926372	0.939002	0.4222	0.920175	0.954239	0.336134	0.349718	0.666727	0.625125	0.913584	0.944524	0.658386	0.456675	0.409719	0.420279	0.675295	0.574442	0.919145	0.849404	0.726062	0.471466	0.973121	0.794957	0.380212	0.403535	0.952322	0.94711
628	0.685476	0.947351	0.474276	0.363706	0.954093	0.60389	0.500791	0.941458	0.421954	0.479011	0.940746	0.471359	0.327321	0.845408	0.671229	0.96232	0.345873	0.392287	0.617289	0.500599	0.546015	0.983877	0.93354	0.951401	0.430834	0.929971	0.956168	0.33306	0.351383	0.67762	0.642891	0.923508	0.939919	0.676158	0.464546	0.412899	0.425485	0.687782	0.574715	0.92906	0.874396	0.738871	0.478814	0.967224	0.810792	0.38783	0.413256	0.947627	0.948825
630	0.693579	0.952272	0.47891	0.365185	0.953279	0.614532	0.515888	0.950766	0.421789	0.488192	0.943865	0.490415	0.333006	0.871121	0.691032	0.968302	0.354387	0.391283	0.62329	0.508965	0.557942	0.9786	0.948269	0.967682	0.435485	0.954354	0.954568	0.335362	0.356524	0.680268	0.658886	0.944365	0.946949	0.692813	0.47297	0.419242	0.434484	0.708395	0.584183	0.938787	0.896842	0.749754	0.486126	0.976738	0.83304	0.392949	0.422223	0.947914	0.953704
632	0.68781	0.948893	0.48735	0.363068	0.933802	0.611082	0.523636	0.964017	0.43378	0.496596	0.9464	0.499537	0.341201	0.885348	0.713256	0.969259	0.357319	0.386908	0.643431	0.51564	0.56955	0.986036	0.955178	0.956377	0.456652	0.94962	0.943771	0.339185	0.360789	0.707934	0.684546	0.950304	0.948091	0.706838	0.48076	0.417885	0.440688	0.726778	0.591143	0.952519	0.917034	0.754262	0.488508	0.968911	0.848879	0.395962	0.42169	0.960992	0.961227
634	0.703781	0.952128	0.496913	0.36432	0.929951	0.622502	0.528757	0.965382	0.432195	0.503609	0.940788	0.500533	0.352856	0.898717	0.739034	0.985524	0.356957	0.393109	0.654553	0.527167	0.575258	0.977721	0.951535	0.963541	0.463422	0.965052	0.943797	0.340859	0.362065	0.717763	0.696982	0.956414	0.942434	0.721473	0.484093	0.429823	0.448479	0.73818	0.61316	0.962699	0.927626	0.772057	0.491277	0.97139	0.863315	0.403177	0.422416	0.952445	0.958014
636	0.706577	0.953725	0.507215	0.37091	0.939296	0.625951	0.538407	0.954853	0.440561	0.505847	0.949952	0.503188	0.359061	0.926881	0.756967	0.993764	0.367549	0.401394	0.667463	0.537865	0.58012	0.969611	0.962641	0.969894	0.464347	0.986391	0.949613	0.345221	0.376638	0.755084	0.71561	0.958225	0.947233	0.734625	0.492904	0.429446	0.459323	0.770908	0.627647	0.968375	0.938711	0.783629	0.497978	0.978109	0.870802	0.410929	0.43182	0.956275	0.963003
638	0.72111	0.969577	0.525873	0.375285	0.937489	0.63413	0.55408	0.960026	0.453427	0.518898	0.95012	0.518422	0.371198	0.957208	0.773051	1.00615	0.371231	0.417014	0.68179	0.544774	0.586462	0.973315	0.964139	0.964202	0.475683	0.985867	0.953647	0.356755	0.383972	0.786887	0.73752	0.979881	0.96863	0.753733	0.502785	0.437994	0.4758	0.790228	0.651081	0.964607	0.944868	0.802433	0.497612	0.982501	0.900857	0.418331	0.433735	0.966147	0.973791
640	0.734564	0.96009	0.542104	0.385834	0.939094	0.642406	0.559774	0.961214	0.466651	0.529956	0.954109	0.517431	0.375127	0.964807	0.783794	1.0032	0.370219	0.427815	0.697144	0.552296	0.597819	0.986576	0.970949	0.958657	0.488356	0.985326	0.953246	0.358305	0.385829	0.82896	0.756783	0.978235	0.970689	0.769268	0.50793	0.440638	0.474623	0.804154	0.661623	0.967729	0.939259	0.83623	0.504474	0.985606	0.912581	0.429858	0.43483	0.975783	0.972924
642	0.73906	0.96531	0.551531	0.397348	0.948733	0.655339	0.563645	0.968501	0.468418	0.531238	0.962603	0.534233	0.379808	0.973023	0.799179	1.00923	0.370587	0.434312	0.700452	0.556968	0.602528	0.97854	0.969677	0.969433	0.497523	0.993166	0.96886	0.363486	0.387501	0.84041	0.775528	0.974939	0.973299	0.79198	0.527113	0.454751	0.485201	0.8356	0.679228	0.966782	0.951994	0.868572	0.514352	0.996406	0.93306	0.435285	0.449991	0.97765	0.973236
644	0.741999	0.954991	0.551937	0.40809	0.962614	0.6699	0.581451	0.966558	0.475883	0.540065	0.958279	0.549562	0.375171	0.978196	0.806661	1.00959	0.373098	0.435314	0.715564	0.565144	0.615509	0.991906	0.975661	0.979114	0.50778	0.987462	0.966428	0.364807	0.399757	0.868666	0.799188	0.974557	0.993763	0.81823	0.544637	0.454686	0.499314	0.871578	0.686702	0.962544	0.953586	0.888761	0.527927	1.00191	0.939283	0.43503	0.458955	0.986011	0.981204
646	0.754288	0.9567	0.551628	0.409777	0.946924	0.68037	0.58509	0.974897	0.476798	0.547934	0.951985	0.557698	0.380201	0.977525	0.828979	1.00248	0.367454	0.445941	0.727387	0.574959	0.624419	0.995723	0.980674	0.987401	0.50794	0.969281	0.955003	0.365899	0.400202	0.883602	0.821036	0.967409	0.989932	0.843125	0.551346	0.455267	0.493479	0.877893	0.700475	0.957835	0.963462	0.898768	0.535547	1.00601	0.960267	0.438448	0.461815	0.993165	0.966227
648	0.7673	0.950503	0.552052	0.415326	0.947909	0.702313	0.5938	0.978404	0.482643	0.559531	0.950196	0.563638	0.37641	0.973783	0.855508	0.988937	0.371093	0.442698	0.748818	0.590412	0.634392	0.990533	0.981885	0.986877	0.511296	0.972117	0.954696	0.366652	0.409002	0.896496	0.83561	0.956402	0.988074	0.866347	0.558764	0.463352	0.494784	0.904214	0.711985	0.969813	0.971271	0.920514	0.555631	1.00588	0.966476	0.432606	0.464892	0.989979	0.956383
650	0.754865	0.964037	0.549436	0.418351	0.957222	0.72538	0.604321	0.97607	0.482661	0.56802	0.950592	0.581882	0.375769	0.970712	0.867295	0.989599	0.370762	0.445856	0.779428	0.605584	0.652267	0.994489	0.991154	0.978177	0.515537	0.979935	0.965176	0.375471	0.416073	0.909427	0.858289	0.955895	0.991919	0.889042	0.568416	0.469224	0.498327	0.934211	0.727445	0.981629	0.983393	0.929936	0.569582	1.01098	0.964461	0.432407	0.46992	0.987547	0.965466
652	0.776141	0.958937	0.5598	0.424928	0.962265	0.741093	0.617173	0.984325	0.492722	0.581384	0.952733	0.580578	0.372476	0.963671	0.881215	0.992351	0.380309	0.455266	0.819553	0.626666	0.669406	0.99763	0.993838	0.968741	0.524516	0.984989	0.967941	0.37777	0.420398	0.920432	0.868285	0.96951	0.994466	0.905706	0.578246	0.465066	0.502615	0.951268	0.741578	0.977285	0.986063	0.938264	0.581203	1.00614	0.970988	0.438548	0.468131	0.978099	0.974347
654	0.779982	0.971011	0.575486	0.423876	0.953256	0.764562	0.628965	0.98263	0.507476	0.600353	0.952145	0.590897	0.379637	0.958429	0.911789	0.986633	0.381758	0.461187	0.855816	0.632993	0.677679	0.997754	0.994431	0.96388	0.530084	0.988053	0.976112	0.384683	0.422329	0.932188	0.886823	0.960111	0.993217	0.915376	0.577007	0.471127	0.50534	0.954315	0.749154	0.967897	0.985364	0.944961	0.59099	1.00017	0.975595	0.450314	0.468872	0.975062	0.960498
656	0.783046	0.979132	0.579173	0.421493	0.95536	0.786295	0.641267	0.984468	0.51322	0.601672	0.958337	0.604172	0.377365	0.958834	0.920604	0.993589	0.390016	0.461311	0.892471	0.637279	0.694418	1.00654	0.989582	0.952985	0.548151	0.994764	0.985706	0.389981	0.424769	0.92931	0.903252	0.974144	0.996772	0.936499	0.590525	0.476139	0.516557	0.9533	0.764064	0.977453	0.979308	0.959645	0.599216	0.993756	0.971154	0.452837	0.472257	0.975924	0.980115
658	0.794744	0.983956	0.5956	0.419098	0.964988	0.797051	0.65448	0.987045	0.510084	0.602992	0.97038	0.619526	0.378131	0.959032	0.929216	0.991978	0.394081	0.466589	0.906277	0.649145	0.703144	1.0111	0.993186	0.949898	0.557131	0.984302	0.988544	0.396225	0.429459	0.93225	0.915033	0.978154	0.989888	0.953923	0.597057	0.472757	0.521259	0.954657	0.769499	0.97529	0.971836	0.969364	0.594138	0.985195	0.95386	0.459745	0.478562	0.974745	0.986957
660	0.793036	0.976417	0.614022	0.421069	0.953823	0.818353	0.67228	0.994611	0.520535	0.605514	0.970939	0.634627	0.375475	0.963419	0.948994	0.987607	0.399363	0.473598	0.92974	0.667256	0.71595	1.00904	0.983916	0.9575	0.566864	0.981535	0.98384	0.395754	0.428776	0.932356	0.924117	0.982745	0.9831	0.960338	0.609596	0.479681	0.530401	0.947393	0.796195	0.952615	0.965881	0.968217	0.592946	0.979861	0.96755	0.464329	0.485733	0.97805	0.990777
662	0.793862	0.982198	0.614984	0.418225	0.955725	0.84652	0.686533	0.984568	0.527472	0.612305	0.961048	0.648331	0.37575	0.961661	0.962095	0.988945	0.404989	0.479942	0.940519	0.670924	0.72741	1.0195	0.987788	0.958295	0.571747	0.980908	0.975402	0.395628	0.430466	0.945347	0.933249	0.976208	0.982504	0.973274	0.604936	0.492392	0.541465	0.94021	0.814691	0.955696	0.963108	0.972691	0.597505	0.974499	0.964368	0.470486	0.495903	0.977876	0.970864
664	0.80678	0.973414	0.622826	0.420026	0.963366	0.853337	0.69378	0.993697	0.527853	0.616534	0.958182	0.652593	0.371459	0.972012	0.966409	0.987866	0.408158	0.492499	0.943831	0.692376	0.745966	1.01063	0.998072	0.960565	0.584142	0.986296	0.969792	0.397595	0.4279	0.9505	0.944039	0.98512	0.970984	0.982841	0.625221	0.504949	0.552293	0.942236	0.850013	0.969052	0.964433	0.977815	0.592248	0.964769	0.960494	0.474872	0.501845	0.980046	0.983293
666	0.809612	0.969971	0.647334	0.424717	0.95594	0.873062	0.718636	0.986981	0.5373	0.640605	0.956354	0.661048	0.375497	0.973887	0.983376	0.97032	0.411056	0.492724	0.935737	0.707659	0.768695	0.997918	0.994455	0.965564	0.580107	0.991286	0.959886	0.40172	0.436451	0.967675	0.959041	0.975758	0.965751	0.98448	0.639935	0.517714	0.562168	0.96072	0.860017	0.984292	0.966523	0.978647	0.593604	0.961008	0.962123	0.479908	0.505649	0.97432	0.976088
668	0.823057	0.968737	0.651734	0.43019	0.95351	0.890347	0.730647	0.976977	0.55205	0.658058	0.942531	0.671349	0.381789	0.976681	0.986985	0.98336	0.414371	0.496611	0.947203	0.721973	0.799422	0.98758	0.99251	0.970915	0.587019	0.994357	0.956449	0.400705	0.436378	0.976534	0.963965	0.97409	0.970877	0.997118	0.653375	0.532851	0.56966	0.966595	0.890539	0.988674	0.98052	0.982824	0.602626	0.966434	0.978901	0.490692	0.515684	0.978114	0.970942
670	0.818954	0.984826	0.658355	0.43184	0.96258	0.906871	0.737193	0.981092	0.556101	0.674542	0.940067	0.684015	0.389354	0.971553	0.982435	0.981069	0.420148	0.50453	0.952711	0.733098	0.820701	0.983304	0.988662	0.972324	0.592811	0.991614	0.94683	0.399628	0.451964	0.971474	0.968674	0.968582	0.978258	1.00025	0.666415	0.537942	0.579745	0.979034	0.897161	1.0002	0.985713	0.988385	0.606929	0.971276	0.965874	0.4974	0.519156	0.977566	0.959459
672	0.830716	0.974859	0.669066	0.440099	0.959815	0.91933	0.768083	0.984753	0.563831	0.693011	0.948867	0.699678	0.40059	0.978824	0.979417	0.980017	0.426829	0.509551	0.957575	0.755354	0.842267	0.983113	0.995551	0.979149	0.5952	1.00016	0.955399	0.402732	0.46593	0.972829	0.984889	0.971092	0.982066	0.997072	0.689659	0.537034	0.595568	0.982524	0.910897	1.00511	0.992178	0.994521	0.619581	0.983962	0.963328	0.502927	0.522775	0.988361	0.971337
674	0.833302	0.975199	0.669246	0.444371	0.951239	0.931816	0.785964	0.98647	0.567309	0.701215	0.951836	0.725569	0.408415	0.972732	0.980245	0.974185	0.421202	0.516466	0.966415	0.764147	0.854675	0.979503	0.983826	0.975969	0.602504	0.988682	0.963389	0.403281	0.471477	0.97149	0.985976	0.957539	0.999456	0.983831	0.687798	0.542752	0.596485	0.983272	0.904442	1.00401	0.999852	0.987924	0.638949	0.987786	0.964266	0.502577	0.53053	0.983832	0.954819
676	0.847199	0.975424	0.677601	0.456919	0.96159	0.945927	0.794665	0.991075	0.572318	0.70714	0.954967	0.745743	0.406088	0.971643	0.983264	0.981866	0.419365	0.540934	0.987173	0.782139	0.885208	0.979564	0.996063	0.978196	0.631876	0.991025	0.972003	0.407749	0.480114	0.972391	0.989729	0.964844	1.00168	0.972969	0.69738	0.544836	0.611734	0.978237	0.92103	0.981684	1.00024	0.998198	0.654777	0.980112	0.971079	0.504886	0.543197	0.977573	0.962498
678	0.835095	0.98528	0.690592	0.466897	0.952399	0.951696	0.812351	1.00631	0.581851	0.721839	0.946556	0.755257	0.406705	0.963925	0.976634	0.990795	0.418969	0.558143	0.998805	0.792399	0.901848	0.981581	0.998753	0.973801	0.649622	0.979544	0.970422	0.413021	0.479944	0.9766	1.00693	0.970375	0.999792	0.958938	0.707872	0.53624	0.621098	0.981842	0.927379	0.983433	0.991226	0.984588	0.669547	0.979184	0.961455	0.509895	0.546066	0.978401	0.962121
680	0.849467	0.973842	0.705047	0.472094	0.94757	0.958083	0.833861	1.0044	0.591909	0.744115	0.941656	0.755951	0.412137	0.962	0.984157	0.987376	0.424955	0.567796	0.994642	0.810767	0.91295	0.981013	1.00503	0.975015	0.657376	0.977435	0.972219	0.41645	0.477372	0.971835	1.00887	0.974911	0.99909	0.95287	0.719272	0.545177	0.627544	0.978627	0.942085	0.980261	0.990861	0.979502	0.689655	0.972576	0.969248	0.512915	0.556183	0.974079	0.958981
682	0.846948	0.980889	0.7292	0.471237	0.943331	0.966974	0.840181	0.987499	0.594029	0.759417	0.942052	0.772407	0.411457	0.967117	0.991443	0.97704	0.417782	0.5858	0.989022	0.825325	0.928878	0.967805	1.00531	0.983912	0.667289	0.96384	0.971074	0.422568	0.477793	0.969925	1.01017	0.979881	1.00414	0.958222	0.72509	0.551972	0.626619	0.976552	0.952793	0.978227	0.984644	0.968771	0.690617	0.968568	0.962799	0.516558	0.564471	0.960851	0.958993
684	0.848949	0.979547	0.74985	0.474993	0.945909	0.962064	0.852628	0.975519	0.598819	0.766617	0.942996	0.79558	0.407868	0.97106	0.996451	0.985401	0.43368	0.593273	0.979174	0.839669	0.945557	0.973457	1.00168	0.971427	0.680101	0.96255	0.972542	0.422367	0.48408	0.959328	1.00828	0.986996	0.982147	0.962134	0.741509	0.551646	0.647511	0.972137	0.961478	0.979973	0.983785	0.967006	0.695301	0.964585	0.957335	0.521662	0.565318	0.958885	0.971987
686	0.859682	0.971295	0.767773	0.470534	0.946687	0.971369	0.872296	0.984461	0.613246	0.7823	0.936051	0.81098	0.42042	0.971583	0.98363	0.986871	0.44023	0.594162	0.970319	0.859079	0.93714	0.98037	0.989806	0.969814	0.691557	0.964551	0.962695	0.41985	0.485195	0.961797	1.00241	0.971326	0.987565	0.969382	0.761924	0.550177	0.651128	0.975094	0.974174	0.996701	0.982778	0.964343	0.707593	0.972995	0.948726	0.526204	0.560455	0.966721	0.974343
688	0.849796	0.967087	0.790239	0.470692	0.956684	0.9794	0.89583	0.985113	0.615624	0.79862	0.963437	0.846478	0.422778	0.973389	1.00337	0.980588	0.449277	0.611756	0.964674	0.884433	0.944913	0.989009	0.980044	0.973435	0.705928	0.989246	0.957641	0.424043	0.498696	0.955275	0.999636	0.971207	0.985592	0.965776	0.786793	0.563359	0.665523	0.973487	0.983517	0.99042	0.98046	0.968628	0.723452	0.967785	0.963677	0.53033	0.567909	0.965051	0.973804
690	0.860479	0.965837	0.810682	0.481806	0.969682	0.974909	0.911384	0.982584	0.630241	0.818222	0.967678	0.882285	0.427357	0.98285	1.00445	0.987035	0.445045	0.628343	0.974079	0.893224	0.960302	0.997917	0.983114	0.966773	0.733789	0.993971	0.954009	0.427765	0.508172	0.97319	0.995988	0.979177	0.979023	0.976014	0.804956	0.575206	0.685308	0.970553	0.978736	0.987263	0.991218	0.979571	0.72975	0.96332	0.958522	0.537935	0.573893	0.967564	0.977455
692	0.883004	0.956962	0.822967	0.484756	0.981698	0.965912	0.927998	0.994498	0.648105	0.838449	0.976007	0.905273	0.43984	0.988568	0.997708	0.993026	0.45612	0.639174	0.978145	0.907649	0.969087	1.0069	0.972576	0.958172	0.748724	1.00052	0.953756	0.432428	0.521469	0.974496	0.997811	0.974935	0.974345	0.967129	0.825241	0.584118	0.694374	0.967921	0.968468	0.987623	0.997939	0.982432	0.753748	0.971088	0.961227	0.54808	0.587101	0.980471	0.99075
694	0.888396	0.967276	0.835948	0.491398	0.977066	0.981688	0.938684	1.00629	0.663811	0.86708	0.977361	0.906304	0.456348	0.987867	0.989502	0.9887	0.458888	0.648043	0.986296	0.932483	0.970355	1.00921	0.973216	0.970361	0.771137	0.998412	0.940762	0.444956	0.533404	0.983652	1.01475	0.991119	0.975928	0.973558	0.841646	0.58616	0.694781	0.967135	0.970378	0.977696	0.988697	0.995742	0.771692	0.977381	0.96866	0.545742	0.594225	0.978619	0.99346
696	0.891303	0.979825	0.850862	0.50177	0.975183	0.978957	0.953709	0.994614	0.667257	0.878953	0.978222	0.929632	0.455364	0.983958	0.99067	0.981843	0.46067	0.645175	0.998669	0.941419	0.986965	1.01507	0.974371	0.984948	0.779843	0.989894	0.942832	0.454539	0.549523	0.981228	1.01857	1.00402	0.980532	0.970447	0.855144	0.601518	0.715023	0.973676	0.965585	0.965933	0.980425	0.991455	0.778246	0.983395	0.965647	0.558432	0.614783	0.975174	0.986373
698	0.882257	0.976677	0.862463	0.504868	0.980191	0.977582	0.959533	0.988332	0.676698	0.902244	0.967386	0.938318	0.457363	0.983859	0.977491	0.970732	0.460581	0.641476	1.0064	0.956582	0.985389	1.01785	0.98188	0.987452	0.787206	0.981825	0.943203	0.459426	0.564186	0.980167	1.01136	0.999536	0.988081	0.968634	0.867921	0.606559	0.723903	0.970378	0.960746	0.967943	0.977295	0.998606	0.800164	0.985186	0.957445	0.560066	0.624777	0.981173	0.988685
700	0.890957	0.97221	0.873371	0.50449	0.973141	0.972561	0.970873	0.982325	0.684624	0.897799	0.972359	0.940474	0.456201	0.979738	0.978695	0.97515	0.467537	0.6268	0.999427	0.966901	0.981468	0.997663	0.979334	0.996587	0.788368	0.973712	0.948553	0.470517	0.568397	0.978707	1.01893	0.990359	0.993943	0.959594	0.871299	0.595444	0.743846	0.96668	0.959302	0.967296	0.965998	0.987904	0.81317	0.987861	0.973347	0.565308	0.634037	0.986703	0.994261
702	0.887876	0.979465	0.899388	0.514746	0.975451	0.978879	0.975045	0.997189	0.689149	0.914622	0.96721	0.947212	0.457645	0.979097	0.98454	0.979652	0.47329	0.623765	1.00262	0.972874	0.982359	1.00137	0.978252	1.01032	0.810469	0.978046	0.946667	0.473448	0.569113	0.994652	1.01118	1.00421	0.994893	0.97137	0.879652	0.606295	0.766043	0.976187	0.968608	0.964124	0.966081	0.997755	0.836492	0.994338	0.980741	0.57111	0.640203	0.983054	0.983056
704	0.878506	0.982467	0.931926	0.528182	0.978507	0.969842	0.996274	1.00126	0.710125	0.930316	0.968927	0.959427	0.447091	0.97524	0.993687	0.978751	0.471701	0.636508	0.995779	0.978228	0.987941	0.998797	0.987335	1.01458	0.825804	0.988475	0.963602	0.47688	0.565745	0.992687	1.00592	0.995668	1.00511	0.973646	0.902109	0.610193	0.789177	0.995318	0.97187	0.967115	0.980963	0.992173	0.851983	0.99548	0.976202	0.582875	0.649251	0.988752	0.982748
706	0.916112	0.982228	0.944396	0.535563	0.992007	0.964685	0.994729	1.00818	0.725038	0.94921	0.973069	0.9674	0.453676	0.98115	1.00181	0.982114	0.486932	0.650517	0.999312	0.990071	0.981496	0.997384	0.991407	0.998964	0.848304	0.993645	0.974871	0.479245	0.561081	0.993921	1.00685	0.988204	1.00401	0.978299	0.908774	0.622333	0.800695	0.991577	0.968853	0.963004	0.999324	0.986935	0.884998	0.984279	0.9776	0.586791	0.656594	0.99372	0.979411
708	0.907038	0.989408	0.973626	0.551548	0.97704	0.966568	1.00378	1.00923	0.743054	0.951703	0.968846	0.958919	0.467311	0.987893	1.0096	0.983021	0.497378	0.666474	0.999191	0.986753	0.9918	0.993015	0.998217	0.993935	0.872576	0.992667	0.996373	0.485627	0.564013	1.01077	1.01268	0.983312	0.995989	0.984243	0.922202	0.626701	0.821629	0.995983	0.975124	0.965087	1.00076	0.989919	0.891299	0.995458	0.97399	0.597855	0.6769	0.99907	0.996793
710	0.919496	0.998335	0.982741	0.564201	0.976456	0.973765	1.00764	1.01009	0.750284	0.972344	0.981981	0.969145	0.483292	0.978148	1.00974	0.979784	0.509063	0.695464	0.984259	0.985259	0.992442	1.00776	1.00435	0.990919	0.897236	1.00179	1.00526	0.491665	0.571796	1.00692	1.00791	0.978978	0.995681	0.984847	0.945758	0.642152	0.839168	1.00254	0.980448	0.970731	1.00887	1.00033	0.910173	1.01004	0.964043	0.605577	0.698644	0.992023	1.00067
712	0.928828	0.99132	0.974629	0.570722	0.969881	0.968596	1.00535	1.00133	0.755833	0.961375	0.983229	0.973992	0.480983	0.969123	1.00508	0.97837	0.505674	0.72066	0.981428	1.00245	0.990051	1.00178	0.987526	0.976858	0.91053	1.0002	1.00492	0.492145	0.585117	0.984101	1.007	0.964274	0.988285	0.976602	0.95818	0.644484	0.849244	0.997441	0.976433	0.974447	0.99931	0.999179	0.91897	1.0002	0.957208	0.611493	0.70956	0.99113	0.993983
714	0.917938	0.986819	0.96963	0.571121	0.97647	0.970915	0.998897	0.988494	0.769017	0.974294	0.987532	0.97025	0.492624	0.978839	0.99685	0.986505	0.510752	0.737791	0.980217	0.998927	0.992946	1.01007	0.98651	0.972462	0.929081	1.0019	1.0008	0.492275	0.596972	0.99091	1.0011	0.96221	0.979567	0.976229	0.951459	0.657088	0.864437	0.99238	0.976236	0.975118	0.999933	1.00616	0.943223	0.994579	0.959741	0.623865	0.727617	0.991348	0.988317
716	0.918971	0.97923	0.963681	0.564295	0.966158	0.969419	0.992776	0.988848	0.778942	0.965367	0.984312	0.964537	0.488628	0.976024	0.98996	0.995234	0.51151	0.751206	0.958934	0.986963	0.978925	1.0013	0.98476	0.975296	0.931366	0.989407	0.997816	0.490314	0.598267	0.984498	0.993578	0.959531	0.965102	0.965164	0.955662	0.655003	0.877875	0.988409	0.982732	0.981172	0.98647	1.00366	0.944114	1.00344	0.96382	0.638759	0.735435	0.982119	0.982792
718	0.922968	0.976579	0.943666	0.554719	0.975973	0.965546	0.984552	0.992781	0.784825	0.972058	0.991126	0.968074	0.486501	0.974794	0.982642	0.997545	0.517208	0.755576	0.951014	0.983777	0.973027	0.998867	0.983145	0.978973	0.936912	1.00192	0.997293	0.489423	0.592331	0.976073	0.98856	0.963982	0.96475	0.967397	0.952306	0.672433	0.88894	0.98734	0.968548	0.970854	0.983928	1.0008	0.9606	1.00749	0.963552	0.645366	0.739542	0.97475	0.96846
720	0.893583	0.979474	0.953093	0.552156	0.972059	0.969956	0.988693	1.00111	0.811038	0.963484	0.983059	0.962298	0.480242	0.996793	0.972262	0.99605	0.516387	0.777781	0.962893	0.997823	0.966977	0.99054	0.97772	0.987814	0.945756	1.00103	0.998414	0.491126	0.605978	0.9788	0.990692	0.969762	0.957381	0.9664	0.94955	0.683132	0.897874	0.99302	0.970907	0.969516	0.983393	1.00309	0.963811	0.99421	0.968367	0.665012	0.746952	0.981614	0.967554
722	0.913057	0.994149	0.969468	0.557495	0.96668	0.975003	0.982923	0.998497	0.828103	0.975539	0.989825	0.95954	0.493099	0.990104	0.976458	0.994173	0.521718	0.789158	0.973596	0.985325	0.97393	0.99338	0.99568	0.982774	0.95394	1.00105	1.00038	0.50802	0.608092	0.989307	1.00097	0.969982	0.964074	0.971665	0.956491	0.695503	0.913166	1.00967	0.966619	0.970296	0.992174	0.995934	0.973414	0.987117	0.977589	0.677129	0.759884	0.982929	0.973472
724	0.930712	0.982164	0.982546	0.567349	0.957355	0.976363	0.977597	1.00808	0.838618	0.965016	0.992913	0.96692	0.493619	0.984693	0.980224	0.990127	0.531838	0.80484	0.97975	0.980089	0.97329	0.99136	0.985308	0.972111	0.963082	1.00384	0.987561	0.511812	0.614964	0.982681	0.999068	0.966907	0.963832	0.967229	0.963564	0.709389	0.92411	0.99984	0.966291	0.973909	0.981016	0.99689	0.973934	0.999911	0.967256	0.68885	0.780851	0.988243	0.983822
726	0.9345	0.984151	0.990094	0.588147	0.948046	0.986239	0.970439	1.0054	0.860569	0.968991	0.990212	0.9616	0.508237	0.991472	0.985261	0.977215	0.526038	0.820442	0.999072	0.988988	0.98873	0.985952	0.984812	0.975705	0.975343	1.01356	0.988595	0.530477	0.634029	0.988995	0.998876	0.960719	0.968768	0.971355	0.965545	0.716155	0.933023	1.00439	0.954313	0.973936	0.984978	1.00154	0.980729	0.994403	0.970928	0.695267	0.797832	0.997071	0.982721
728	0.926367	0.972738	1.00348	0.607841	0.939906	0.980136	0.976413	1.00487	0.892214	0.966263	0.994722	0.978479	0.512964	0.986359	0.984581	0.988794	0.519793	0.841436	1.00457	0.989402	0.986189	0.983776	0.973507	0.979975	0.985699	1.00917	0.98343	0.540697	0.661809	0.992595	0.995451	0.9629	0.96276	0.977295	0.962336	0.722386	0.948271	1.00201	0.954218	0.981581	0.997004	1.0025	0.974495	0.990464	0.97033	0.709033	0.821652	0.995385	0.980901
730	0.919272	0.968442	0.999293	0.623837	0.943918	0.977002	0.971105	1.01622	0.904143	0.976797	1.00506	0.979366	0.520144	0.974985	0.998112	1.00283	0.526749	0.848869	1.01017	0.991828	0.992672	0.99092	0.97381	0.958818	0.997513	1.01057	0.974065	0.546201	0.665565	0.986801	0.995853	0.973474	0.96841	0.989175	0.974396	0.73933	0.957865	1.00451	0.952196	0.98651	1.003	0.996002	0.988797	1.00386	0.972729	0.717161	0.838955	0.985546	0.969326
732	0.937394	0.968599	0.978418	0.626009	0.950176	0.973186	0.988883	1.01402	0.921639	0.964815	0.989663	0.973005	0.513108	0.979156	0.990392	0.997067	0.531606	0.857434	0.999616	0.982121	0.983771	0.9848	0.967166	0.957906	0.997154	1.00237	0.96695	0.538699	0.666467	0.981035	0.993332	0.976755	0.957163	0.982011	0.967347	0.742371	0.965071	0.995456	0.960759	0.979933	0.99797	0.991528	0.981116	1.00466	0.962022	0.719259	0.847903	0.986893	0.962832
734	0.943612	0.975722	0.960768	0.639345	0.953566	0.974988	0.99809	1.0087	0.928471	0.9827	0.986575	0.983019	0.526605	0.982169	0.995008	1.00185	0.548521	0.875972	1.00824	0.994607	0.984756	0.982536	0.977409	0.964653	0.992738	1.00887	0.988157	0.545267	0.681896	0.986973	1.00967	0.973701	0.975791	0.992419	0.984554	0.746954	0.974766	1.00979	0.957299	0.986737	1.00591	0.982471	0.980718	0.99851	0.981376	0.726054	0.863779	0.989021	0.964901
736	0.915243	0.973469	0.971562	0.647654	0.963963	0.95956	1.01121	1.00964	0.935749	0.998445	1.00785	0.987601	0.529279	0.987328	1.00037	1.01383	0.563373	0.904682	0.997509	1.00006	0.98818	0.998386	0.980848	0.971797	0.999849	1.00882	0.989665	0.548798	0.687809	0.989448	1.01968	0.990174	0.978901	1.00551	0.991517	0.776819	0.984061	1.01083	0.980899	0.985622	1.00685	0.996493	0.987006	1.0011	0.973034	0.748009	0.894791	0.999841	0.972791
738	0.959567	0.985671	0.972289	0.652265	0.973535	0.964974	1.00428	1.00271	0.934367	1.0035	0.999134	0.974385	0.529482	0.992859	1.00562	1.00868	0.582567	0.928707	0.998676	1.00639	0.992433	1.00521	0.989991	0.97991	1.00374	1.01016	0.991463	0.552929	0.689611	0.991449	1.02362	0.979108	0.990656	0.990872	0.996799	0.788388	0.991381	1.01782	0.983502	0.98087	1.00844	0.997806	0.993942	0.987509	0.984026	0.770147	0.90556	1.00932	0.978996
740	0.957558	0.992689	0.972429	0.662541	0.974858	0.962866	1.00695	0.997591	0.938349	0.991387	0.993371	0.987736	0.532599	0.991549	1.00134	1.00069	0.588621	0.952072	1.01065	1.00315	0.994308	1.00368	0.991574	0.997569	0.999306	1.0228	1.00587	0.555897	0.710836	1.00645	1.01262	0.971251	0.993898	0.9896	0.991764	0.797632	0.990551	1.02131	0.999851	0.978245	1.00358	1.00343	0.99607	0.975064	0.985959	0.782772	0.93148	1.01961	0.988033
742	0.949256	1.00277	0.992336	0.687068	0.971954	0.971085	1.00368	0.999552	0.951902	1.00457	1.00554	0.997625	0.545516	0.995815	1.01104	1.01391	0.608829	0.959935	1.0128	1.01404	1.00858	1.01319	1.00069	1.00418	1.0023	1.03045	1.01943	0.567492	0.732349	1.03152	1.00703	0.980778	1.00519	0.996137	0.998461	0.823311	0.991173	1.01205	0.998567	0.990651	1.01132	1.00706	1.00066	0.984104	0.9991	0.799617	0.955261	1.02661	1.00054
744	0.956537	1.00983	1.00554	0.697897	0.979286	0.979604	0.997956	0.998242	0.956283	0.98141	1.00338	0.989499	0.544712	0.998292	1.00737	1.00795	0.608713	0.966404	1.00412	1.01498	1.01154	1.00662	1.00382	1.00894	1.00462	1.02795	1.00703	0.573849	0.749774	1.01789	0.997258	0.983397	0.989271	0.995625	0.992281	0.849461	0.984583	1.00269	1.01541	0.995985	0.998288	1.01438	1.01123	0.993636	0.997028	0.810417	0.962287	1.02598	0.992742
746	0.963919	1.01884	0.996105	0.712949	0.972605	0.980437	1.00325	0.993275	0.964274	0.970962	0.985701	0.986269	0.543522	0.999633	1.00466	1.01252	0.619036	0.975098	1.019	0.999104	1.01273	0.998447	1.0058	1.00069	1.01152	1.02957	0.9981	0.570234	0.76505	1.01104	1.00002	0.979074	0.98132	0.986658	0.99243	0.866265	0.982739	1.00583	0.996148	0.993011	0.998639	1.00389	1.01355	0.992656	0.999278	0.819089	0.956869	1.02071	0.991901
748	0.94881	1.01569	0.994362	0.732907	0.984252	0.991818	1.01042	1.00589	0.975524	0.968152	1.00094	0.995973	0.561726	1.01067	1.00697	1.02293	0.624429	0.978711	1.02673	0.999775	1.0154	1.00708	1.00859	0.990101	1.01698	1.04101	1.00118	0.588479	0.782855	1.01112	0.999683	0.983891	0.982588	0.996152	1.00464	0.88624	0.981365	1.01196	1.01084	1.01088	0.991781	1.00871	1.0231	0.994553	1.00675	0.832552	0.964964	1.01992	0.992372
750	0.950595	1.0128	0.998115	0.742878	0.976079	0.991258	1.00189	1.00431	0.991225	0.986586	0.998933	0.991611	0.569481	1.01812	1.00272	1.02372	0.646876	0.970108	1.01043	0.9956	1.01745	1.01352	1.01606	0.991995	1.0122	1.03463	1.00453	0.598764	0.796999	1.00648	1.01801	0.998108	0.983904	1.00031	1.01217	0.903102	0.975935	1.01666	0.999372	1.01693	0.99064	1.00799	1.03821	1.00201	1.00552	0.844219	0.964912	1.02034	0.988784
752	0.98716	1.00335	0.987555	0.746986	0.972065	0.991477	0.993746	1.00274	0.989493	0.977588	0.997777	0.983708	0.573229	1.01655	1.00025	1.016	0.643177	0.982522	1.01497	0.993714	1.00666	1.01427	1.00484	0.988169	1.01085	1.03586	1.00336	0.607515	0.819276	0.99195	1.02169	0.992956	0.981422	1.00037	1.00552	0.919958	0.972716	1.02766	0.996935	1.00146	0.984725	1.01045	1.03474	0.999136	0.987788	0.849272	0.970857	1.02496	0.978811
754	0.967344	0.987839	0.981829	0.75571	0.968136	0.976581	0.987432	1.00846	0.995343	0.984909	0.996924	0.98029	0.575869	1.01034	0.983008	1.0127	0.642697	0.969192	1.02213	0.980293	0.995872	1.01093	1.00241	0.976415	0.998703	1.03391	1.00352	0.616333	0.829019	0.995641	1.0075	0.998306	0.985847	0.998393	1.00262	0.923409	0.977644	1.03682	0.977013	0.983868	1.00028	0.998183	1.01346	0.985631	0.976448	0.860754	0.975837	1.017	0.977772
756	0.957148	0.98364	0.981552	0.768862	0.974018	0.974347	0.985409	1.01056	1.0017	0.993561	0.998585	0.985954	0.591461	1.00053	0.984997	1.0088	0.64898	0.961345	1.01701	0.988917	0.990705	1.01189	0.997016	0.979583	0.9865	1.03115	1.00448	0.632271	0.845507	0.994943	1.00023	1.00869	0.999107	1.00455	0.999244	0.934971	0.984366	1.03214	0.981205	0.999555	0.997871	0.995095	1.0172	0.993852	0.991726	0.874156	0.987507	1.01586	0.985295
758	0.936973	0.984888	0.98634	0.783416	0.957518	0.961897	0.980599	1.00907	0.997555	0.991088	0.983055	0.982333	0.59171	0.987475	0.982469	0.986029	0.649474	0.961525	0.999602	0.983962	0.986321	0.991793	1.00022	0.978319	0.975091	1.02236	1.00163	0.627312	0.85275	0.993702	0.997056	1.01825	0.997953	1.01223	0.992036	0.949723	0.990294	1.03158	0.968062	0.988962	0.991459	0.984255	1.00457	0.990619	0.971018	0.875394	0.995928	1.01459	0.98287
760	0.95559	0.983571	0.984457	0.798228	0.963295	0.963189	0.988623	1.00653	0.990871	0.984675	0.981339	0.972924	0.594062	0.983511	0.988394	0.983781	0.645024	0.971458	1.0047	0.983843	0.994654	0.984567	0.992205	0.972823	0.977399	1.01902	0.986968	0.627912	0.85558	0.993755	0.985583	1.00134	0.99593	0.999003	0.984912	0.957623	0.995814	1.02454	0.967854	0.983757	0.990528	0.978279	0.990995	0.983604	0.967913	0.881777	0.996496	0.997494	0.97283
762	0.965632	0.973776	0.99024	0.805484	0.963933	0.952427	0.993715	1.01316	0.994061	1.00309	0.97578	0.984793	0.602773	1.00057	0.98735	0.993723	0.66372	0.965795	1.00036	0.990686	0.989	0.982841	0.990712	0.972992	0.987518	1.01825	0.982379	0.631914	0.853432	0.995609	0.988869	0.997728	1.00157	0.998995	0.989467	0.958555	1.00474	1.01722	0.971223	0.990832	0.992715	0.972927	0.99589	0.978971	0.983038	0.907789	1.00223	0.999949	0.979884
764	0.960018	0.993379	1.00927	0.818772	0.974557	0.967424	1.01648	1.0194	0.995669	1.00186	0.990126	0.986445	0.617406	1.00389	1.00442	1.01401	0.684297	0.988698	1.01607	1.0118	1.00556	0.994818	1.00296	0.989415	0.999327	1.02462	1.00064	0.644493	0.8716	1.00988	1.01109	0.998631	1.00347	1.00862	0.995558	0.987359	1.01591	1.01739	0.98224	1.0116	0.988222	0.998398	1.01433	0.996391	0.989912	0.935604	1.00361	1.00699	0.992251
766	0.969413	0.994286	1.01561	0.841613	0.973323	0.985387	1.01744	1.02	0.987764	1.00416	0.991983	0.994972	0.62826	1.00597	0.99251	1.0057	0.707186	0.985444	1.0172	1.00718	1.00428	1.00523	1.00754	0.975665	0.99297	1.03418	1.00098	0.663629	0.889054	1.00707	1.01348	0.997082	0.990858	1.00599	0.996905	0.9983	1.00965	1.02073	0.98377	1.00218	0.984907	1.00554	1.00143	1.0023	0.985568	0.958143	1.00042	1.005	0.990589
768	0.998941	0.992234	1.00136	0.852088	0.972634	0.985091	1.02376	1.0159	0.996603	1.00713	0.998199	0.989047	0.638485	1.00973	0.997861	1.00373	0.727339	0.976606	1.02494	1.00207	0.994606	1.01049	1.00704	0.984885	1.00215	1.02887	0.989032	0.675057	0.907003	1.00046	1.02526	0.99434	0.989683	0.986079	0.992883	1.00767	1.00184	1.00997	0.98912	0.996522	0.988112	1.00372	1.0025	1.01791	0.998943	0.979497	1.00232	0.992243	0.98543
770	0.967852	0.982999	1.00003	0.858321	0.972291	0.978741	1.0191	1.00731	0.989912	1.01446	0.984996	0.992304	0.651794	1.00223	0.977158	0.984754	0.731931	0.957928	1.01786	0.99405	0.973632	1.01305	0.996166	0.985155	0.994925	1.02824	0.988798	0.700076	0.913515	0.989999	1.02981	0.994504	0.983257	0.983554	0.987447	1.00973	0.991169	0.994465	0.983137	0.993883	0.985652	0.997297	1.00223	1.02426	0.993095	0.994736	0.990536	0.998065	0.987839
772	0.963014	0.991787	1.00405	0.895448	0.976443	0.97975	1.02562	0.998825	0.992154	1.00878	0.996096	0.991076	0.655746	0.990662	0.97321	0.979818	0.746943	0.958818	1.01813	0.990118	0.985614	1.00815	0.997262	0.99296	0.989766	1.02887	0.992439	0.720244	0.934849	0.992622	1.03535	0.996549	0.985802	0.986325	0.982735	1.02498	0.997658	1.00818	0.984798	1.00317	0.98005	0.998911	1.00339	1.02277	0.988089	1.00549	0.987644	0.989338	0.984955
774	0.941523	0.997118	0.997742	0.91268	0.969833	0.97781	1.02104	0.996674	0.991974	1.0096	0.993069	1.00206	0.666974	0.996722	0.971047	0.969666	0.762466	0.959412	1.00712	0.973672	0.98598	1.00916	0.987112	0.982835	0.989026	1.01222	0.98898	0.726913	0.942901	0.994407	1.03531	1.00323	0.988183	0.983419	0.981854	1.02396	1.00112	1.00336	0.989542	0.984534	0.979599	0.988739	1.00239	1.00977	0.996213	1.00654	0.99015	0.992445	0.975822
776	0.980739	0.999997	1.00124	0.918504	0.972282	0.973813	1.01551	1.00089	1.00417	1.00086	0.999155	0.999996	0.661848	1.00325	0.987222	0.977281	0.774556	0.967005	0.995526	0.97895	0.984682	0.996639	0.991159	0.996566	0.995637	1.00201	0.994224	0.729686	0.949477	0.997249	1.03152	0.988893	1.00131	0.991945	0.987609	1.02157	1.01569	0.995041	0.981721	0.984303	0.974861	0.988949	1.00421	1.00362	0.99465	1.00151	0.992516	0.981143	0.967757
778	0.994999	1.00665	1.03118	0.94072	0.987763	0.982028	1.01313	1.00839	1.01361	1.00343	1.0093	1.01513	0.666327	1.00356	0.984273	0.992657	0.789048	0.973793	0.98506	0.988386	0.994032	1.01177	0.988941	0.992886	0.982221	1.01298	1.0024	0.746688	0.958363	1.01087	1.03514	0.988029	1.00589	1.01178	0.994362	1.01426	1.01957	1.01005	0.977733	0.991804	0.976557	1.00275	1.0198	1.01923	1.00036	1.00004	0.988966	0.990147	0.973484
780	0.972381	1.0173	1.02385	0.960386	0.979604	0.976722	1.01807	1.01505	1.00753	0.99681	1.02048	1.02736	0.672825	1.00686	0.995438	1.00712	0.807306	0.98997	0.988964	0.999439	1.00559	1.01254	0.991944	0.998506	0.997224	1.01227	1.00648	0.752715	0.969062	1.01837	1.04119	0.976151	1.00026	1.02028	1.00609	1.02083	1.03064	1.00963	0.962852	0.995957	0.975666	1.017	1.01415	1.01548	1.00212	1.01295	0.994451	0.986994	0.986399
782	1.00125	1.01563	1.02526	0.962749	0.981868	0.974853	1.00694	1.01841	1.01612	0.988291	1.01698	1.02421	0.689052	1.0045	0.997539	1.01589	0.812727	0.995773	0.981168	1.00214	0.996802	1.01236	0.993937	0.994088	0.987108	1.01992	0.99641	0.765935	0.979188	1.01442	1.02417	0.980193	0.995057	1.02162	1.02873	1.01547	1.02662	0.997979	0.956434	0.987813	0.976085	1.02384	1.02256	1.0225	1.01093	1.00469	0.99801	0.985114	0.980264
784	0.957769	1.00671	1.00582	0.97714	0.983083	0.973371	0.992248	1.01423	1.02764	0.977546	1.013	1.01149	0.693744	1.01265	0.987983	1.02364	0.824092	0.985666	0.978716	0.999361	0.992514	1.00871	0.997748	0.997896	0.983724	1.03237	0.986902	0.785081	0.986529	1.01194	1.02015	0.971343	0.998406	1.01983	1.03597	1.00562	1.01403	0.996012	0.947081	0.990315	0.978552	1.01382	1.02194	1.03063	1.00754	1.00955	0.991739	0.983088	0.97897
786	0.977891	1.01111	0.9971	0.988066	0.985018	0.971538	0.991863	1.01264	1.02405	0.977848	1.01726	1.01635	0.709609	1.00119	0.977742	1.03274	0.833276	0.982334	0.984427	1.0048	1.00293	1.00839	0.993075	0.998805	0.976843	1.03538	0.990751	0.793407	0.989194	1.01024	1.03314	0.966472	0.995914	1.01883	1.03559	0.998933	1.00218	0.999139	0.958883	0.992012	0.992243	1.0054	1.03206	1.03115	1.00344	1.00452	0.978839	0.990039	0.975986
788	0.987004	0.99931	0.983076	0.989147	0.968132	0.976678	0.986849	1.00475	1.01069	0.972573	1.01164	1.00372	0.724812	1.00274	0.977	1.03781	0.851501	0.978983	0.992008	1.0077	1.0275	0.998491	0.990626	0.996598	0.981705	1.03634	1.00017	0.800948	0.97688	0.995061	1.02779	0.964065	0.996487	1.01175	1.03983	1.01629	0.997043	0.984846	0.957341	0.992526	0.988617	1.00687	1.02157	1.00161	0.985196	1.0109	0.984584	0.991116	0.973549
790	0.983042	1.00998	0.996181	0.997971	0.985846	0.991593	0.986585	1.01733	1.0229	0.976765	1.00603	0.981882	0.735333	1.00475	0.990023	1.04909	0.876971	0.978427	0.998429	1.01827	1.0139	1.0016	0.99065	0.993276	0.973465	1.03236	1.00724	0.813898	0.982062	0.997097	1.01816	0.98229	1.01708	1.02147	1.03263	1.02831	0.996751	0.989313	0.98579	0.996691	0.995561	0.995435	1.02458	0.988466	1.00147	0.993069	0.985702	1.00006	0.972008
792	0.991691	1.00921	0.99751	0.986757	0.991026	0.998024	0.981492	1.01532	1.01525	0.972614	0.999941	0.978058	0.748858	1.00241	0.99453	1.04715	0.8908	0.97044	1.00918	1.02836	1.02368	1.0043	0.985132	0.999342	0.967719	1.03142	1.01492	0.825752	0.970702	0.993275	1.03923	0.970581	1.01415	1.02526	1.02041	1.03016	0.990822	0.994544	0.992103	0.992722	0.99551	0.990018	1.02716	0.982815	0.997605	0.990297	0.986069	0.999424	0.967164
794	0.987409	1.00379	1.01333	0.988005	0.989979	0.983358	0.988381	1.02291	1.00879	0.979821	0.997488	0.988533	0.752948	0.991684	1.00452	1.03133	0.906504	0.977293	1.01158	1.03382	1.01856	1.00452	0.987092	0.994382	0.957453	1.03524	1.01748	0.844458	0.955144	0.985731	1.02698	0.973995	1.01407	1.01576	1.01751	1.03125	0.984445	0.995292	0.994818	0.993541	0.984395	0.994517	1.02041	0.982627	0.987508	0.986796	0.993424	0.997477	0.966277
796	0.977772	0.992531	1.02035	0.977203	0.978582	0.973754	0.985198	1.03192	0.999319	0.973547	0.993743	0.974523	0.771325	0.996863	1.00654	1.01542	0.920696	0.973598	1.00421	1.03204	1.00766	1.00377	0.998101	0.986478	0.959948	1.03876	1.00656	0.867859	0.953772	1.00193	1.02192	0.987168	1.01617	1.01098	1.01323	1.03768	0.979842	0.998893	0.982384	1.00008	0.981117	0.998242	1.00789	0.97944	0.99336	0.982536	0.999191	0.99801	0.978805
798	0.982444	0.998851	1.01786	0.975466	0.988131	0.96419	0.992902	1.03216	1.00381	0.97974	0.986303	0.979648	0.781138	1.00174	1.01008	1.00187	0.930664	0.993819	1.00469	1.02141	0.996209	1.01025	0.995068	0.986614	0.962081	1.03091	0.994278	0.883097	0.969406	1.00811	1.01926	0.981394	1.00531	1.01709	1.01502	1.02311	0.980499	1.01009	0.992959	0.997294	0.986436	0.985906	1.0122	0.989847	1.01061	0.98751	0.997492	0.995826	0.985759
800	0.978154	0.991507	1.0272	0.980889	0.98943	0.962123	0.98946	1.02859	1.0054	0.987504	0.9994	0.996689	0.787163	1.01408	1.01211	0.999878	0.943033	1.00535	1.01085	1.00959	1.00219	1.02068	1.00462	0.988183	0.964649	1.03463	0.989472	0.904164	0.972149	1.01106	1.02741	0.988964	1.00379	1.01611	1.02117	1.01069	0.987731	1.02178	0.991963	0.996697	0.979332	0.993006	1.01431	1.01002	1.00389	0.994574	1.00646	0.994142	0.984572
802	0.996675	1.00312	1.0335	1.00394	0.985249	0.966336	0.998412	1.02502	1.01001	0.996239	1.00422	1.00418	0.798648	1.0145	0.999013	1.00303	0.967294	1.01522	1.01362	0.993264	1.00358	1.0171	1.01556	0.981364	0.976168	1.02699	0.997984	0.924117	0.973611	1.01742	1.01565	0.987339	0.997911	1.0133	1.01666	1.01432	0.994926	1.02652	0.987731	1.004	0.98345	1.00379	0.997151	1.01407	0.997725	0.996493	1.00796	1.00182	0.992593
804	0.997615	1.01232	1.03415	0.986665	0.969425	0.978397	0.995144	1.02164	1.0077	0.996097	0.998461	0.992804	0.820484	1.00871	0.99571	1.00233	0.975086	1.00529	1.01737	0.992293	1.00101	1.03028	1.00425	0.985481	0.98885	1.01457	0.992083	0.930269	0.980782	1.01499	1.02071	0.983226	1.00442	1.02256	1.01526	1.00895	1.00272	1.02571	0.989429	1.00154	0.995237	1.01694	1.00226	1.00205	1.00623	0.99606	1.01391	0.997298	0.99217
806	0.998121	1.02295	1.02656	0.995797	0.976546	0.994474	1.00751	1.01162	1.01751	1.00386	1.00314	1.00006	0.82698	1.01351	0.995027	1.01977	0.983142	1.00624	1.02934	0.992853	1.01149	1.04032	0.9851	0.984415	0.99792	1.01619	1.00114	0.943335	0.977096	1.00473	1.01659	0.980393	1.00315	1.02413	1.02051	1.0157	1.01181	1.0331	1.00442	1.00267	0.997803	1.03382	1.01124	0.991729	0.999511	1.00931	1.01965	0.996659	0.985819
808	0.984499	1.01939	1.02469	0.993678	0.968274	1.0018	1.00136	1.0126	1.01496	1.00975	0.996026	0.99417	0.840132	1.01307	0.989518	1.03182	0.989684	0.990883	1.0237	0.998981	0.994702	1.03856	0.980558	0.96704	0.996503	1.01036	1.0078	0.964916	0.974976	0.994996	1.01263	0.980576	1.00114	1.00827	1.01567	1.01844	1.00202	1.02591	0.990929	1.00265	0.996145	1.04029	0.99693	0.992866	0.987592	1.00532	1.00555	0.998924	0.979942
810	0.988514	1.01173	1.00547	0.990329	0.967415	1.00563	0.996835	1.01129	1.01303	1.00296	0.988717	0.98897	0.859669	0.992544	0.978765	1.03163	0.99021	0.994273	1.02336	0.99829	0.992622	1.01867	0.975881	0.966074	0.99546	1.01488	1.01612	0.981268	0.982933	0.990074	1.0095	0.962522	0.99092	0.992903	1.01211	1.02844	1.00175	1.02076	0.979517	1.00947	1.00002	1.04865	1.00615	0.981333	0.989353	1.01396	0.992834	1.00086	0.990184
812	0.975197	0.994955	0.980591	0.973032	0.961587	1.00897	0.987854	1.02376	1.0139	0.99409	0.986415	0.98831	0.863658	0.989656	0.979191	1.02027	0.9958	0.979846	1.02089	0.999556	0.980637	1.01824	0.977719	0.964913	1.00862	1.00813	1.00068	0.984943	0.973847	0.992615	1.01599	0.971932	0.998828	0.98279	1.01441	1.02207	0.994705	1.00851	0.972085	1.00617	1.00292	1.04246	1.01453	0.980948	0.992785	1.01829	0.988487	0.9919	0.984684
814	0.989966	0.990009	0.973365	0.979936	0.978828	1.00821	0.985646	1.02495	1.01241	0.997237	1.00605	0.996994	0.873541	0.996372	0.973041	1.02503	1.00367	0.984128	1.00516	1.00367	0.986646	1.00638	0.985457	0.966473	1.00485	1.01119	1.00324	0.995678	0.983486	1.00032	1.02891	0.973996	0.995853	0.980597	1.00961	1.03589	0.999977	1.00656	0.967912	1.01783	1.004	1.0423	1.00865	0.994137	0.999263	1.01909	0.989524	0.996876	0.995765
816	0.972736	0.991773	0.977815	0.98327	0.99179	0.996158	0.987594	1.03934	1.00917	0.994353	0.9949	0.997722	0.898818	0.992032	0.979631	1.01477	1.00762	0.990645	1.00952	0.995008	0.992709	1.00928	1.00851	0.969511	1.01139	1.01287	0.993653	0.99813	0.981624	1.00104	1.02007	0.975967	1.00097	0.972831	1.01023	1.02663	1.00789	0.980152	0.971882	1.00997	0.99487	1.02674	1.01363	0.999272	0.998827	1.01856	0.993268	1.00422	0.994775
818	0.997505	0.997975	0.979184	0.986604	1.00612	0.995906	0.989621	1.04166	1.01041	0.995592	1.01893	1.0014	0.908331	0.988	0.976872	1.01847	1.01901	0.995621	1.01215	0.997877	1.00846	1.00687	1.02161	0.994677	1.00202	1.01872	0.990042	1.00413	0.981093	1.00621	1.02429	0.99012	1.01072	0.98618	1.01631	1.02347	1.02161	0.980112	0.982628	1.01366	1.00206	1.02873	1.01941	0.995443	1.01465	1.01495	0.99798	1.01289	0.999714
820	0.994847	1.00428	0.992634	0.983082	1.00579	0.998538	1.0024	1.04085	1.00355	0.996018	1.01889	0.994722	0.92367	1.00757	0.986312	1.01495	1.0177	0.991217	1.01003	1.00686	1.02095	1.02062	1.02096	1.01103	1.00642	1.02158	0.986746	0.999858	0.975241	1.0182	1.03216	1.00964	1.02073	0.999231	1.01618	1.01649	1.02344	0.975759	0.986765	0.999119	1.01328	1.02016	1.00524	1.00408	1.00971	1.00193	1.00709	1.01822	1.00261
822	1.0011	1.01785	1.00544	0.985483	1.01831	1.00706	1.01535	1.04106	1.00567	1.01545	1.00809	1.00254	0.951536	1.02262	1.00241	1.02385	1.00073	0.99622	1.01364	1.01895	1.03618	1.03029	1.02462	1.02382	0.988509	1.03679	1.00815	1.00033	0.992132	1.01179	1.02698	1.00713	1.02202	1.01749	1.01883	1.01528	1.02551	0.979469	0.999328	0.997061	1.0061	1.02357	0.999104	1.00252	1.02099	0.998906	1.01429	1.01446	1.013
824	1.00916	1.01176	1.0105	0.983598	1.01328	1.00292	1.01649	1.02412	1.01079	1.011	0.98856	0.991456	0.966519	1.03611	1.01486	1.02276	0.988005	0.993235	1.02395	1.00335	1.03559	1.03262	1.02163	1.0148	0.983718	1.03654	1.00994	1.00232	0.989466	1.01397	1.0266	1.00389	1.01581	1.01921	1.02756	1.01672	1.01644	0.994731	1.00999	0.991188	0.997762	1.01325	1.00196	0.996257	1.01885	0.99305	1.00324	1.01923	1.02077
826	1.00994	1.00667	1.01153	0.98602	1.0097	1.01423	1.00385	1.01756	1.00258	1.02009	0.995095	0.999245	0.973464	1.0333	1.01151	1.02519	0.984164	0.995832	1.01752	1.01062	1.0219	1.04018	1.00664	1.01521	0.968935	1.04302	1.02848	1.0063	0.99501	1.0135	1.04303	1.00713	1.00987	1.01747	1.02236	1.0254	1.00785	1.01611	1.0177	0.991662	1.00917	1.01126	0.98858	0.998676	1.01894	0.987504	1.00073	1.01281	1.0193
828	0.991002	1.01197	1.01549	0.987484	0.998757	1.01428	0.999205	1.01831	1.00653	1.0176	0.97163	0.998241	0.992547	1.04045	1.02198	1.02883	0.967708	1.00175	1.02014	1.02541	1.02102	1.04739	1.00603	1.0093	0.974961	1.05119	1.02827	0.996312	1.00039	1.01333	1.04427	0.992202	1.01372	1.02645	1.01625	1.04688	1.01627	1.01061	1.00504	1.00617	1.01099	1.01155	1.0004	1.00559	1.01171	0.983972	1.01068	1.00013	1.01504
830	0.997504	1.02736	1.03222	0.998564	0.993904	1.01146	0.984237	1.0203	1.02002	1.02819	0.984295	1.01584	1.01037	1.02968	1.02467	1.05129	0.990973	0.998589	1.01909	1.03105	1.01878	1.04074	1.02055	1.00801	0.974661	1.05519	1.03238	1.01285	1.00226	1.01362	1.04609	0.981702	1.02078	1.02621	1.02467	1.05242	1.01876	1.03495	1.01145	1.01623	1.0096	1.0172	1.01564	1.01324	1.02875	0.98817	1.00816	1.00927	1.00897
832	1.00576	1.02422	1.02767	0.994654	0.978473	1.00342	0.973533	1.00676	1.0132	1.01616	0.994015	1.00275	1.00626	1.01537	1.01525	1.04142	1.00176	0.999168	1.01355	1.0177	1.00784	1.03675	1.00533	0.995725	0.983746	1.05132	1.01334	1.01851	1.00308	1.00433	1.03375	0.979462	1.02236	1.01844	1.02396	1.05935	1.01865	1.04088	1.01168	1.01807	1.01625	1.01218	1.02944	1.00853	1.02351	0.986679	0.989548	1.00364	1.00427
834	1.03155	1.03659	1.03104	1.00376	0.981773	1.00239	0.992324	1.02122	1.00691	1.02702	1.00276	1.0204	1.01627	0.994672	1.00706	1.05024	1.02119	1.00407	1.00531	1.02947	1.02038	1.04727	1.01839	1.01095	0.990486	1.05348	1.0113	1.01002	1.00256	1.01157	1.02166	0.981531	1.02764	1.01071	1.01339	1.07126	1.02478	1.03199	1.00555	1.0097	1.02685	1.00982	1.03834	1.01469	1.01935	0.995684	0.994421	1.00692	0.981114
836	0.976257	1.04689	1.03887	1.01249	0.98047	1.00746	1.00979	1.01934	1.00663	1.02804	1.00216	1.02128	1.01195	1.00411	1.00194	1.0371	1.02677	1.00201	1.00225	1.03308	1.0307	1.03586	1.03106	1.01565	0.998957	1.04762	1.00612	1.01784	1.01377	1.00794	1.01516	0.976305	1.03563	1.02281	1.02814	1.07597	1.03222	1.02813	0.988196	1.01161	1.02776	1.01149	1.04508	1.01632	1.02914	0.992609	1.00455	1.01896	0.983413
838	1.00495	1.04151	1.03155	1.01331	0.982739	1.007	1.00883	1.01097	0.993312	1.01414	1.01854	1.02032	1.01558	0.990258	0.981236	1.01307	1.02016	0.983376	0.998309	1.01903	1.01123	1.01936	1.01696	1.01319	0.998308	1.03391	1.01456	1.01995	1.00164	1.01557	1.0039	0.972851	1.0187	1.0142	1.00852	1.05147	1.01316	1.03532	0.997435	0.987396	1.02335	1.00357	1.03265	1.00555	1.02189	0.991782	0.998743	1.0162	0.985196
840	1.01227	1.02093	1.00624	1.01571	0.982874	1.01065	1.0148	1.00341	0.996056	0.994362	1.00731	1.00578	1.01354	0.996416	0.970752	1.00413	1.01018	0.986524	0.999643	1.01924	1.01197	1.02089	1.00499	1.0044	0.998027	1.03255	1.01128	1.01093	1.00706	1.01086	1.00545	0.971904	1.00735	1.00902	1.00365	1.05503	0.999127	1.01656	0.989625	0.988447	1.01833	1.00582	1.02966	1.00308	1.00287	0.995975	0.997984	1.00607	0.976825
842	0.975292	1.01215	1.01491	1.02526	1.00038	1.01321	1.028	1.00647	0.993123	1.0023	1.00016	1.01159	1.02762	1.01502	0.981656	1.00467	1.00292	0.999966	0.992398	1.03213	1.00844	1.01929	1.02388	1.01743	0.99422	1.03531	1.03012	1.01034	0.997753	1.00904	1.02267	0.975896	1.00434	1.01202	1.0035	1.05788	0.997259	1.00894	0.979678	1.00118	1.01928	1.01072	1.02035	1.01555	1.0019	1.00411	1.00266	1.01707	0.981199
844	1.00968	1.00392	1.01382	1.02174	0.997175	1.01459	1.01987	1.01447	0.995544	0.997807	1.01029	1.01381	1.02885	1.02223	0.996383	1.00288	0.994255	1.00148	1.00845	1.0393	0.998656	1.00773	1.01229	1.018	0.997176	1.03503	1.03321	1.01736	1.00628	1.00719	1.03153	0.990069	1.00139	1.02519	1.00385	1.03378	0.993181	1.004	0.985413	1.01723	1.01379	1.02106	1.01174	1.01351	1.00487	0.997277	0.999639	1.01213	0.99748
846	1.00435	0.999872	1.00692	1.00516	1.00184	0.997994	1.01452	1.00369	1.00289	0.989407	1.01263	1.00067	1.03028	1.02605	1.01106	1.01317	0.993929	1.00079	1.01349	1.04098	0.995158	0.997662	1.00432	1.02367	0.999663	1.03134	1.03791	1.006	0.992503	1.0196	1.03867	0.999912	0.998296	1.02474	0.992717	1.03041	1.00108	1.00284	0.974653	1.02243	1.00388	1.01666	1.00393	1.00845	1.00025	0.99108	0.995363	1.00644	0.996592
848	1.02184	1.0007	1.03167	1.00202	1.00484	0.992173	1.02583	1.01298	1.02079	0.992898	1.00248	0.996859	1.025	1.04668	1.03482	1.03559	1.01998	1.0103	1.02315	1.04761	1.00421	1.00448	1.01663	1.01986	1.0148	1.04218	1.02624	1.02059	1.0076	1.02239	1.05868	1.01962	1.01474	1.02975	1.00933	1.04876	1.01494	0.992251	0.979812	1.02954	1.00403	1.01877	1.00524	1.01002	1.00615	0.988376	0.993241	1.0102	0.993876
850	1.00281	0.998679	1.02971	0.9913	1.00707	0.98651	1.02156	1.01947	1.01492	1.01003	0.998284	0.998628	1.02851	1.04986	1.04397	1.02585	1.00713	1.00926	1.02111	1.03833	0.99417	1.013	1.02204	1.00554	1.01198	1.04183	1.03486	1.01039	0.997191	1.01618	1.04598	1.01804	1.01061	1.02811	1.0013	1.0423	1.02027	0.986085	0.988995	1.02879	0.993073	1.01569	0.989879	1.01042	1.00249	0.980788	0.994879	0.997257	0.998836
852	1.01561	1.00115	1.02417	0.992474	0.999031	0.972773	1.01296	1.01972	1.01418	0.998274	1.00606	0.991195	1.02356	1.04634	1.04431	1.03075	1.02033	1.00674	1.03109	1.02967	1.00065	1.00605	1.01519	0.996974	1.0144	1.04449	1.01604	1.01564	1.00256	1.02826	1.04146	1.01307	1.00681	1.01779	0.999242	1.04114	1.02153	1.00028	0.99541	1.01897	0.985212	1.01731	0.977715	1.00479	0.995523	0.988978	1.00547	1.00192	1.00273
854	0.999581	1.01023	1.01572	1.00058	0.999603	0.981354	1.00784	1.0036	1.02723	0.991536	1.00797	0.984084	1.02855	1.04558	1.04078	1.03249	1.01719	1.00276	1.0199	1.02572	0.994523	1.00655	1.00937	0.987454	1.00271	1.03998	1.01951	1.01604	0.995308	1.01666	1.04055	1.00986	0.991994	1.02233	0.999855	1.05587	1.02129	1.01036	0.987523	1.01676	0.995974	1.01533	0.983324	1.00578	0.990282	0.995394	1.00987	1.00516	1.00265
856	0.995189	1.00342	1.01042	1.00944	0.988337	0.982965	1.01202	1.01329	1.02593	0.986588	0.999314	0.993426	1.03612	1.04182	1.03496	1.03602	1.01501	1.00918	1.02843	1.02816	1.00497	1.01506	1.01439	0.971513	0.997911	1.04558	1.01539	1.01605	0.997873	1.0004	1.04153	1.00109	0.993917	1.01122	1.01037	1.05154	1.00201	1.01715	0.999993	1.01466	1.0042	1.02646	0.995623	1.00969	0.986399	1.01	1.00125	1.00761	1.00719
858	1.01104	1.00729	1.00307	1.01147	0.996187	0.988954	0.999212	1.01487	1.02039	0.997841	1.00707	1.00132	1.04195	1.03025	1.04157	1.04407	1.01428	1.00088	1.03116	1.02502	1.02458	1.03117	1.02201	0.976852	0.996183	1.03968	1.03109	1.00343	0.977995	0.992581	1.02964	0.993518	1.00238	1.00746	1.02006	1.04239	1.0013	1.03153	1.00303	1.0245	1.00187	1.01721	1.00226	1.0192	0.988664	1.02162	1.01216	1.01028	1.01855
860	1.00324	1.01689	1.00806	1.00038	0.990954	0.990805	1.00271	1.01295	1.01964	1.00199	1.02256	1.00285	1.03696	1.02947	1.04562	1.05738	1.0237	0.997759	1.03034	1.02486	1.03431	1.01876	1.01388	0.990053	0.998755	1.03658	1.01667	1.00692	0.9803	1.00871	1.03528	0.998183	1.00697	1.00953	1.03771	1.04345	0.993433	1.04331	0.98568	1.0225	1.01662	1.01953	1.00954	1.01795	0.992613	1.0348	1.00923	1.02359	1.02038
862	1.02483	1.02175	1.01798	0.994467	0.993598	1.00142	1.01363	1.03489	1.0174	1.00322	1.02339	1.01651	1.03706	1.01293	1.04826	1.05369	1.03445	0.998712	1.0349	1.02989	1.05164	1.02591	1.0229	0.993711	1.0153	1.03209	1.03367	1.00782	0.991867	1.00571	1.04923	1.01121	1.00328	1.01491	1.03261	1.03754	0.996846	1.02687	0.989209	1.02063	1.03819	1.02092	1.03019	1.01938	1.0123	1.03963	1.01108	1.02013	1.02679
864	1.0141	1.01564	1.02264	0.984728	0.989683	0.995993	1.01281	1.03889	1.01055	1.02371	1.01381	1.0194	1.01895	1.0107	1.05752	1.05209	1.0422	0.998548	1.03471	1.0171	1.05716	1.02464	1.03674	1.00615	1.02606	1.03294	1.03412	1.00612	0.992274	1.01092	1.05493	0.999673	1.0193	1.00977	1.03315	1.02929	1.0012	1.01341	0.987565	1.02041	1.02631	1.01347	1.0307	1.03335	1.0084	1.04762	1.00974	1.01709	1.01882
866	1.02559	1.01831	1.02965	0.982977	0.997922	0.997546	1.00625	1.03087	1.00237	1.03972	1.01282	1.01501	1.00676	1.01694	1.05864	1.05943	1.03937	0.999025	1.02613	1.00831	1.04513	1.02727	1.04507	1.00869	1.03097	1.02849	1.02982	1.01118	0.989316	1.01921	1.05708	1.00502	1.01757	1.02505	1.03379	1.01878	0.998273	1.01159	0.991887	1.02812	1.01405	1.00717	1.03205	1.0368	1.02193	1.04185	1.01367	1.02155	1.02227
868	1.00997	1.01601	1.01927	0.983569	0.975899	0.997449	1.01787	1.02128	0.991776	1.03213	0.991898	1.00297	1.01102	1.01042	1.04202	1.05163	1.03091	1.00814	1.02358	1.00583	1.02412	1.01473	1.04168	1.01147	1.01775	1.03198	1.01233	1.01186	0.997761	1.0122	1.05575	1.01063	1.00706	1.02147	1.02178	1.01195	0.993196	0.996497	0.977317	1.0263	1.02114	1.01961	1.02517	1.03119	1.02058	1.0319	1.00823	1.02448	1.01591
870	1.00971	1.01202	1.01924	0.984232	0.987915	0.994239	1.01834	1.01229	0.988449	1.01738	0.97701	1.00458	1.00761	1.00954	1.02347	1.04346	1.03654	1.01083	1.03134	1.00827	1.02552	1.02755	1.04877	1.01004	1.01288	1.03444	1.0144	1.00548	1.00294	0.995168	1.04889	1.00681	1.00446	1.03195	1.01702	1.0126	1.01067	0.990419	0.977346	1.02509	1.01494	1.02307	1.01736	1.02557	1.0295	1.02454	1.01919	1.01624	1.01008
872	0.995447	1.01846	1.014	0.993011	1.00126	0.977932	1.01133	1.00078	1.00135	1.02675	0.981697	1.00191	1.00909	1.01919	1.02036	1.04883	1.03209	1.01889	1.02858	1.02192	1.01959	1.03279	1.03966	1.01269	0.998939	1.02967	1.00258	1.00157	0.984622	1.0068	1.02422	1.00103	1.02206	1.03957	1.02794	1.02204	1.01983	0.991628	0.990236	1.02666	0.99959	1.01842	1.00858	1.03243	1.01891	1.00617	1.01455	1.02685	1.01229
874	1.00745	1.02191	1.01131	1.00388	1.02155	0.991738	1.01496	1.00782	1.0069	1.02257	0.977908	0.994773	1.02639	1.02806	1.00759	1.04811	1.03487	1.02422	1.02953	1.02763	1.01546	1.04221	1.03517	1.00324	1.00313	1.03793	0.991355	1.01075	0.981672	1.0045	1.01927	1.00693	1.01969	1.04324	1.03299	1.0283	1.00047	0.992893	0.994591	1.01665	1.00458	1.02063	1.01461	1.01174	1.01439	1.00432	1.01604	1.01693	1.01566
876	1.02377	1.01209	1.0028	1.00288	1.01521	0.994706	0.995433	1.0183	1.02666	1.0335	0.985165	0.994408	1.02999	1.01862	1.00522	1.03823	1.04428	1.01845	1.03017	1.03243	1.02544	1.03406	1.02403	1.00634	0.995965	1.03837	0.991243	1.00442	0.976562	1.00992	1.01786	1.00375	1.01884	1.04282	1.02374	1.04105	1.01317	0.984761	0.989269	0.998618	1.01008	1.0194	1.01068	1.0108	1.00288	1.00425	1.01527	1.0051	1.01104
878	1.01819	1.01767	1.00097	0.996918	1.03805	0.994407	0.992595	1.02531	1.03642	1.02522	1.00273	1.00958	1.02832	1.03304	1.01071	1.0415	1.04894	1.01978	1.03474	1.04322	1.03628	1.02966	1.02046	1.00192	1.00164	1.03335	1.0045	1.00409	0.982895	1.03337	1.02505	0.995779	1.0168	1.05187	1.0219	1.05083	1.01372	0.995444	0.990428	0.99819	1.00582	1.0134	1.01874	1.02122	1.01119	1.0171	1.0215	1.00849	1.01999
880	1.00499	1.01345	0.997504	1.00976	1.02682	1.00503	0.992813	1.03333	1.03054	1.03345	1.0046	1.00891	1.03902	1.02844	1.01773	1.04334	1.03855	1.02367	1.02811	1.03192	1.04452	1.02469	1.02215	0.999844	0.996259	1.0279	0.996344	1.00154	0.976874	1.04824	1.04147	0.994169	1.02415	1.03477	1.01551	1.06174	1.00518	0.993887	1.00427	0.990236	1.00111	1.01032	1.02986	1.02089	1.0066	1.01951	1.01838	1.02648	1.01257
882	1.02021	1.00512	0.997219	1.0061	1.01507	1.01985	0.996238	1.02859	1.02346	1.03357	1.00749	1.00141	1.0401	1.03859	1.01695	1.0473	1.04732	1.02531	1.01886	1.00988	1.03301	1.01777	1.02603	1.0059	0.993403	1.03124	1.0061	0.989767	0.993638	1.04275	1.0456	0.996142	1.02826	1.03137	1.0172	1.05764	0.998801	0.993812	0.98222	0.991663	1.00219	1.00823	1.03665	1.02706	0.995432	1.03036	1.01966	1.00992	0.999682
884	1.01451	1.0047	1.00435	1.00109	1.01234	1.01268	0.985828	1.02013	1.01559	1.01311	1.01295	1.00707	1.03841	1.03051	1.01509	1.04454	1.05297	1.02605	1.01951	1.01277	1.02313	1.00826	1.02727	1.01303	0.983727	1.02738	1.01686	0.987111	0.988527	1.04384	1.03916	1.00251	1.01823	1.02902	1.02549	1.05673	1.01688	0.992903	0.979878	0.999964	1.00864	1.00613	1.02412	1.02004	0.996245	1.01828	1.01618	1.01183	0.997055
886	1.01731	1.00414	1.01499	0.997722	1.0158	1.00993	1.00707	1.01007	1.01859	1.00015	1.02056	1.00911	1.04181	1.02757	1.01253	1.04576	1.06915	1.0258	1.00983	1.01405	1.01304	1.02337	1.02959	1.01675	0.985126	1.02765	1.01813	0.993448	1.0002	1.04333	1.03881	0.99709	1.0087	1.01869	1.03154	1.04258	1.0192	1.0092	0.986383	1.01324	1.01184	1.01042	1.02842	1.01978	1.00011	1.02425	1.01198	1.01508	0.99345
888	1.0029	0.987008	1.01226	0.999655	0.997317	1.0093	1.01005	1.00821	1.00547	1.01161	1.01704	1.00201	1.03506	1.01408	1.00618	1.03985	1.07445	1.02524	1.00145	0.987409	0.995834	1.02251	1.01827	1.02149	0.975743	1.02381	1.00383	0.995505	0.98895	1.03008	1.02651	0.998103	0.997147	1.01343	1.0323	1.04044	1.02442	1.01125	0.987201	1.00064	1.00306	1.01039	1.02587	1.01173	0.992016	1.02266	1.00393	0.997396	0.972075
890	1.00402	0.977936	1.01501	0.989821	0.996604	0.995444	1.01496	1.00187	1.00586	1.00134	1.02005	0.998836	1.02216	1.01258	0.996356	1.02962	1.06085	1.01288	0.995207	0.995518	0.972326	1.00736	0.996364	1.02004	0.975581	1.01502	1.01424	1.00542	0.986124	1.02748	1.02086	0.992306	0.988519	1.00761	1.02827	1.03041	1.02366	1.01148	0.975439	1.00159	1.00424	1.00364	1.02202	1.00727	0.989588	1.01177	0.996927	0.974795	0.969723
892	0.995951	0.979643	1.01882	0.984904	0.996863	1.00282	1.01309	1.00474	1.00946	1.00324	1.00338	0.996035	1.00812	1.00034	0.994002	1.01741	1.03534	0.998475	0.992049	0.998159	0.967878	1.00712	0.996878	1.00663	0.979157	1.00829	1.0031	1.00745	0.97344	1.03889	1.03646	0.983774	0.967555	1.01065	1.01456	1.03407	1.02619	1.01187	0.97931	1.00152	0.999067	0.999101	1.01994	0.999537	0.995913	1.00274	0.992907	0.986065	0.971822
894	0.988153	0.972712	0.995875	0.983613	0.992779	0.99425	1.02279	1.0024	1.00243	1.01401	1.00079	0.998418	1.00272	1.01238	0.996708	1.0306	1.03414	0.989707	0.995131	0.997632	0.981186	1.01531	0.992497	1.00226	0.977486	1.01133	1.00451	1.01807	0.9843	1.04303	1.04553	0.981173	0.972586	1.00359	1.01023	1.02491	1.03347	1.02602	0.975268	0.99184	0.987066	0.995625	1.01597	1.00458	1.00087	1.00257	0.989448	0.99702	0.971322
896	1.00417	0.976975	0.990129	0.982858	0.991001	1.00241	1.02183	1.01085	0.983929	1.01167	0.990841	0.996891	1.00033	1.02012	0.996523	1.04241	1.01538	1.00026	1.00881	0.992478	0.980721	0.99859	0.979317	0.998443	0.976947	1.00806	1.00367	1.00925	0.980523	1.03633	1.03908	0.978948	0.984676	1.01174	1.00229	1.0335	1.0176	1.02224	0.972634	0.990628	0.992846	0.997913	1.0072	0.990436	0.99713	0.998667	0.995204	0.994836	0.972566
898	1.00947	0.975689	0.984103	0.984026	0.999655	0.996642	1.023	1.00728	0.989011	1.00006	0.998674	1.01994	0.99777	1.02914	1.00161	1.02901	1.00633	0.999307	1.01018	1.00463	0.987951	0.999668	0.980272	1.0015	0.984748	1.00044	1.01338	1.00752	0.997918	1.02122	1.03547	0.984552	0.997544	1.01822	1.00595	1.02795	1.00237	1.01723	0.979243	0.991912	1.00662	1.0027	1.00043	0.99411	0.988256	0.986824	0.990461	1.00628	0.98124
900	1.00446	0.986482	1.00318	0.98649	0.998879	1.00493	1.01812	1.00974	0.986735	0.999416	1.00008	1.02044	1.00462	1.03646	1.01513	1.03734	1.03077	1.00542	1.01532	1.00535	1.00604	1.00613	0.99507	0.986489	0.993352	1.0118	1.01346	1.00483	1.00926	1.01282	1.02848	0.991927	1.00022	1.02471	1.01954	1.02302	1.00203	1.01348	0.973453	0.993573	1.01266	1.00689	1.00592	0.999129	0.987803	0.994929	0.99355	1.01693	0.995934
902	1.0031	0.996599	1.00664	0.987066	0.989254	0.993433	1.01253	1.00121	0.984903	0.998419	1.00343	1.02556	1.01093	1.03719	1.01064	1.04728	1.03758	1.00034	1.03057	1.01397	1.01217	1.00897	0.987806	0.977939	0.992974	1.00942	1.02382	1.01175	1.01159	0.995981	1.02451	1.00185	1.01449	1.01845	1.02948	1.00825	0.994352	1.01918	0.970481	0.988042	1.01566	1.02011	1.00552	0.989944	0.984985	0.998632	1.00338	1.01212	0.990261
904	1.00782	1.00226	1.02497	0.979042	0.98413	0.997179	0.996984	0.997164	0.996691	1.00161	0.998092	1.0095	1.0072	1.02421	1.01759	1.03503	1.02818	1.00772	1.02317	1.01743	1.01572	0.997883	0.979672	0.981128	1.01502	1.00316	1.01247	1.00055	1.0047	0.990502	1.00984	0.994275	1.01302	1.01082	1.00851	1.00296	0.982454	1.01644	0.969706	0.987123	1.0088	1.03301	1.01064	0.99873	0.981248	1.0016	1.00567	1.00329	0.988918
906	1.0057	1.01552	1.0327	0.979434	0.98832	0.992047	0.989329	0.991127	0.997042	0.996618	1.00678	1.01496	1.02144	1.02394	1.02367	1.03134	1.0274	0.995481	1.02641	1.0338	1.01506	1.00984	0.979221	0.984612	1.02605	0.994317	1.02189	1.00533	1.00991	0.986963	1.00692	1.00206	1.01096	1.01712	1.00219	1.00051	0.99691	1.00777	0.969883	0.981357	1.00426	1.0222	1.01598	1.00676	0.98583	1.00227	1.00492	1.00069	0.986989
908	0.991338	1.02246	1.04653	0.989672	0.978425	1.00871	0.984175	0.991933	0.988252	0.997599	1.00917	0.998456	1.01094	1.02076	1.02408	1.03977	1.02513	1.00395	1.02786	1.02365	1.01728	1.01294	0.991313	0.982534	1.01934	1.00803	1.01473	1.00339	1.00154	1.00937	1.01682	1.01596	1.01116	1.00797	1.0069	1.00526	0.99813	1.0119	0.968813	0.989223	1.00027	1.02165	1.02831	0.994485	1.00003	1.00728	1.00914	1.00013	0.979682
910	1.00337	1.02143	1.02211	0.985158	0.980576	1.00658	0.99392	0.998425	1.00758	1.00295	1.01325	1.00259	1.01023	1.02314	1.01303	1.02933	1.01019	0.991378	1.01631	1.02714	1.02456	1.01626	0.99975	0.992506	1.01935	1.01039	1.00825	1.00367	0.987314	1.01012	1.00944	1.01576	1.00524	1.00999	0.990412	0.99254	0.997336	1.01944	0.985066	0.993609	0.993709	1.01293	1.02838	0.990528	1.0179	1.01068	1.02123	0.998722	0.981424
912	1.00386	1.00858	1.01518	0.990312	0.988265	1.02012	0.99585	1.01004	1.01512	1.00668	1.01886	1.00199	0.996735	1.02073	1.02686	1.03946	1.00633	1.00316	1.00087	1.03236	1.02391	1.02625	1.00158	1.00756	1.02441	1.01264	0.994133	1.00248	0.990485	1.01989	1.00123	1.01449	1.00155	1.0059	0.990733	0.997202	1.00438	1.01989	0.993627	0.99357	0.998476	0.987542	1.03167	0.988238	1.02551	1.00532	1.0144	0.990978	0.987888
914	1.00101	1.00438	1.01443	1.00137	0.981459	1.02566	1.00717	1.03203	1.01492	1.01652	1.025	1.01134	0.995448	1.02557	1.01292	1.04526	1.01089	1.01615	1.00124	1.03896	1.01648	1.03196	1.01838	1.00315	1.00542	1.02256	0.997987	1.00216	0.987634	1.00242	1.01412	1.01218	1.01183	1.01934	1.00582	1.00971	1.0076	1.02416	0.990481	1.01765	0.999547	0.988149	1.04612	0.98569	1.04304	1.01261	1.01946	0.995176	0.990589
916	1.01437	0.987868	1.0152	1.00751	0.968535	1.02779	1.02004	1.04245	1.0214	1.02546	1.03054	1.00952	0.984389	1.01359	1.00886	1.04413	1.0224	1.02963	1.00111	1.03095	1.02433	1.02602	1.0361	1.00107	0.99633	1.03768	0.988926	1.00864	0.989947	1.01627	1.003	1.00806	1.01718	1.00866	1.00262	1.01963	1.00857	1.03714	1.00011	1.01628	1.00371	0.99653	1.04487	0.992405	1.03521	1.01182	1.02051	1.00564	0.987815
918	1.01396	1.00257	1.00814	0.993816	0.989017	1.02186	1.01998	1.04847	1.02966	1.02733	1.01899	1.00363	0.999147	1.01019	1.01221	1.03847	1.02782	1.02155	1.00838	1.04557	1.02233	1.03712	1.03299	0.994639	1.00535	1.02999	0.998093	1.01261	0.985122	1.02019	1.00089	0.993491	1.01723	1.01562	1.0052	1.02019	1.02832	1.04201	1.01333	1.02418	0.99612	1.00503	1.03601	1.00655	1.02593	1.00533	1.0281	1.01567	1.00495
920	1.0172	1.00508	1.01409	1.00942	0.994747	1.02372	1.02358	1.03303	1.01257	1.03313	1.02149	1.00226	1.00282	1.0006	1.02918	1.04198	1.03773	1.02855	1.00195	1.03332	1.01871	1.03494	1.02984	1.0047	1.01168	1.03146	0.992641	1.01501	0.985233	1.01209	1.0109	0.994677	1.02794	1.02255	1.01313	1.03442	1.02418	1.03297	1.01358	1.01633	0.998029	1.00867	1.03015	1.01277	1.0096	1.00671	1.02471	1.0084	0.99542
922	1.01762	1.01309	1.01191	1.00179	0.984263	1.0172	1.01653	1.0277	1.00116	1.01698	1.02811	1.00119	1.01021	1.00918	1.02663	1.04312	1.03614	1.02824	1.00886	1.01785	1.02358	1.02806	1.03367	1.00402	0.992242	1.04115	1.00149	1.00693	0.985137	0.996929	1.0229	0.995967	1.02832	1.03513	1.0069	1.03866	1.01906	1.03589	1.00745	1.03194	0.994514	1.01211	1.03024	1.02148	1.0025	1.00323	1.02738	1.01411	0.989054
924	1.00231	1.00497	1.00623	0.987353	0.987135	1.01004	1.01766	1.01554	0.991551	1.00783	1.02757	1.01341	1.00428	1.00195	1.03179	1.03961	1.03592	1.0175	1.01535	1.01676	1.02022	1.03525	1.02996	0.997765	0.995262	1.03769	0.990229	0.999285	0.991346	1.02232	1.02428	1.00365	1.01851	1.02407	1.01466	1.03198	1.01481	1.02612	1.01959	1.01277	0.995821	1.00646	1.02685	1.01599	1.00003	0.998384	1.01509	1.01495	0.985737
926	1.00806	1.02828	1.00482	0.988308	1.00614	1.01708	1.01965	1.01009	0.996364	1.01588	1.01833	1.00956	1.01404	1.01049	1.03012	1.03599	1.03087	1.0044	1.01724	1.01179	1.01896	1.04195	1.02778	1.0131	0.996478	1.03088	0.997621	0.989319	0.98604	1.01601	1.04247	1.02071	1.00753	1.03338	1.02785	1.01788	1.00693	1.02731	1.01076	1.01856	0.994428	1.0104	1.03194	1.01868	1.00345	0.999117	1.01817	1.01106	0.996756
928	1.00172	1.01228	1.00048	0.9754	0.992155	1.00354	1.02603	1.01252	1.00751	1.02184	1.02834	1.01355	1.01154	1.01732	1.02046	1.0471	1.02614	0.998834	1.00425	1.0064	1.01598	1.03287	1.03161	1.00826	0.998346	1.04177	1.00124	0.983813	0.989392	1.00154	1.03458	1.0158	1.00863	1.02711	1.02536	1.00666	1.00241	1.01908	0.987049	1.0063	0.995356	0.989146	1.0333	1.01225	1.00488	0.998835	1.00697	1.00137	0.987487
930	1.02334	1.0175	1.01522	0.964205	0.987962	0.999846	1.02644	1.02554	1.01433	1.01465	1.03333	1.02036	1.02071	1.01816	1.01149	1.04438	1.02877	1.00368	1.01797	1.00995	1.00372	1.03517	1.04527	1.01575	0.995384	1.0399	1.01289	0.98737	0.990697	1.0219	1.04057	1.00703	1.01132	1.03336	1.03237	1.00774	1.01198	1.02827	0.980446	1.01002	0.998501	0.999593	1.03274	1.01548	1.00101	0.986551	1.00169	1.0041	0.990116
932	1.00019	1.01907	1.02138	0.979996	0.997687	1.00054	1.03507	1.02436	1.03008	1.0149	1.03215	1.02876	1.02979	1.02379	1.01201	1.03357	1.03249	0.99586	1.03228	1.01332	1.00471	1.0325	1.05353	1.00937	1.008	1.02778	1.01833	0.989867	0.990135	1.02554	1.04133	1.00824	1.00653	1.02303	1.04517	0.999165	1.01079	1.0195	0.971119	1.0033	0.990797	1.01323	1.03566	1.01618	0.998305	0.990425	0.993238	1.00193	0.99882
934	1.01373	1.02767	1.03246	0.99084	1.008	1.00817	1.03153	1.02579	1.02259	1.01847	1.03121	1.01564	1.03913	1.03254	1.01667	1.03416	1.03043	0.993812	1.02401	1.02153	1.01004	1.02037	1.04385	1.02938	0.999842	1.02221	1.03399	0.996161	0.982591	1.01676	1.03133	1.00426	1.01939	1.0291	1.04026	1.00892	1.01572	1.02856	0.964108	1.01015	0.990115	1.01392	1.02612	1.02391	0.991363	0.991586	1.00841	1.00357	1.00369
936	1.01561	1.01176	1.03536	0.985064	0.989934	0.990874	1.02203	1.02418	1.02706	0.99984	1.0402	1.01686	1.0305	1.02907	1.03349	1.0468	1.02738	0.9986	1.01792	1.02646	1.00713	1.00796	1.03342	1.01469	1.00169	1.02148	1.02265	0.9999	0.981709	1.02032	1.03346	1.00068	1.03116	1.02525	1.04349	1.02183	1.02201	1.02811	0.964678	1.00955	0.983953	1.01341	1.02688	1.01544	0.990409	0.999076	0.998963	1.01251	1.01222
938	1.00563	1.02242	1.02764	0.995503	0.987402	0.991137	1.01129	1.01066	1.00708	0.986319	1.03071	1.01994	1.0174	1.02331	1.03875	1.03772	1.02991	1.00802	1.01653	1.02594	0.998931	0.984516	1.00444	1.01672	0.992224	1.0149	1.01517	1.00567	0.978911	1.0174	1.03691	0.995413	1.02642	1.02713	1.04171	1.03867	1.01347	1.02881	0.968192	1.01077	0.987623	1.01194	1.02181	1.01139	0.987476	0.997027	1.00788	1.00316	1.0035
940	1.01392	1.02071	1.01515	0.984376	0.993587	0.992022	1.00021	1.00963	1.0124	0.981977	1.01837	1.01947	1.00005	1.02307	1.03981	1.04357	1.03111	1.00051	1.0134	1.0269	0.995264	0.97849	0.989541	1.00261	0.979877	1.0004	1.00757	0.986045	0.979201	1.00598	1.03213	0.992179	1.01535	1.0239	1.02341	1.03521	1.0092	1.03238	0.962123	1.01806	0.971032	1.00792	1.01868	1.00704	0.990714	0.999032	1.00725	1.00146	0.998117
942	0.986378	1.00345	1.00708	0.968856	0.996893	0.982438	0.99756	1.02322	1.00033	0.997895	1.02094	1.01904	1.00461	1.00745	1.0211	1.03141	1.03399	1.00152	0.99487	1.02784	0.996031	0.982942	0.980485	1.00669	0.989072	1.00112	1.00872	0.982243	0.98573	1.01608	1.0211	0.981027	1.01849	1.02133	1.01709	1.05064	1.02243	1.03752	0.977336	0.997466	0.975039	1.00763	1.0082	1.00434	0.994141	1.00482	1.0129	1.00211	0.996495
944	0.99689	1.00659	0.998135	0.961307	0.988713	0.974761	1.00468	1.01763	1.0147	0.996696	1.01686	1.01672	1.00314	0.999762	1.009	1.0187	1.02714	0.996829	0.998693	1.00626	0.988161	0.978239	0.980939	0.992402	0.994007	0.992935	1.00525	0.971642	0.99373	1.02888	1.02358	0.978522	1.0082	1.01336	1.00253	1.02278	1.02117	1.02829	0.974973	0.982889	0.967665	1.00161	1.01216	0.997767	1.00245	1.00387	0.997584	0.990477	0.986122
946	1.00808	1.00419	0.990119	0.964383	0.993541	0.983985	1.00875	1.02128	1.01227	0.996235	1.02032	1.00922	0.993083	1.01212	1.00018	0.997293	1.02098	0.998983	1.00055	1.0036	0.987213	0.986276	0.987694	0.98961	0.994678	0.98723	1.00038	0.969616	0.993094	1.02918	1.01728	0.96575	1.01347	1.00875	0.987463	1.0086	1.01758	1.0173	0.976607	0.980555	0.971502	0.989661	1.01332	1.00056	1.00931	0.995194	0.997868	0.97686	0.957596
948	0.986002	1.00785	1.00739	0.977643	1.00312	0.995634	1.0153	1.03314	1.02992	1.01606	1.02862	1.00867	1.01017	1.01362	0.995284	1.00268	1.02406	1.00655	1.0075	1.00706	1.00619	1.00445	1.00737	0.987074	1.00141	0.991232	0.997387	0.973456	0.999431	1.03538	1.02588	0.974901	1.01179	1.00721	0.998981	0.999595	1.02356	1.01491	0.978622	0.982011	0.971047	1.00306	1.01688	1.0136	1.01525	1.00578	0.995985	0.980107	0.974074
950	1.00349	0.995336	1.00505	0.998431	1.00286	0.995648	1.02974	1.02937	1.02783	1.02564	1.0344	1.00019	1.01211	1.01701	0.9907	0.996064	1.01845	1.01502	1.00825	1.01072	1.01497	1.01017	1.00907	0.988346	1.01592	1.00858	1.00924	0.985255	0.999438	1.05011	1.02809	0.989247	1.01672	1.00983	1.00072	0.99845	1.02006	1.00146	0.985617	0.980874	0.992537	0.997947	1.02101	1.01758	1.01956	1.0115	1.00965	0.994428	0.987824
952	1.01289	1.00753	1.00565	1.00816	0.993307	0.993761	1.03276	1.01129	1.01897	1.0295	1.0337	0.997264	1.00363	1.0287	1.00252	0.997949	1.01598	1.01111	1.01319	1.00176	0.997482	1.00729	1.00556	0.986528	1.01551	1.02156	1.00004	0.994758	0.993058	1.03829	1.03287	0.996493	1.00772	1.01832	0.993525	0.986981	0.999766	1.01598	0.977897	0.997457	0.993241	0.999787	1.01726	1.01385	1.02047	1.00975	1.00593	0.99489	0.992448
954	1.00869	1.01642	1.013	1.02427	0.998173	0.999349	1.04189	1.01758	1.01501	1.02181	1.03328	1.00493	1.02148	1.0319	1.02073	1.02201	1.01896	1.01771	1.02233	1.0191	1.00958	1.01379	1.01277	0.986546	1.02077	1.03063	0.996705	1.00843	0.985634	1.03227	1.03844	0.997317	1.0048	1.03275	1.0165	1.01442	0.994525	1.02582	0.987595	1.0069	1.00461	1.00934	1.01754	1.02435	1.02296	1.01135	1.02171	1.01101	1.00228
956	1.00484	1.01578	1.01477	1.0301	1.00975	1.00457	1.02764	1.01199	1.01405	1.03898	1.02425	1.00984	1.04048	1.00966	1.02286	1.03391	1.0293	1.03215	1.01552	1.02196	1.02654	1.02378	1.01617	0.994696	1.01257	1.0437	1.00798	1.02155	0.987211	1.03533	1.03836	1.00644	1.00204	1.04261	1.02835	1.02505	0.985736	1.0239	0.982323	1.0049	1.00766	1.02393	1.00997	1.02581	1.01734	1.01319	1.02247	1.0088	1.01792
958	1.02696	0.990441	1.00607	1.0223	1.01707	1.00512	1.03496	1.01363	1.00137	1.03438	1.01381	1.00331	1.04321	1.00979	1.03397	1.02484	1.04268	1.03162	1.02951	1.02437	1.01827	1.02296	1.02212	1.00322	1.02212	1.04269	1.01811	1.02444	0.988508	1.03654	1.04724	1.00775	1.00148	1.04011	1.01441	1.02688	1.00111	1.03123	0.996579	1.00371	1.0134	1.00974	1.00996	1.0161	1.01949	1.0065	1.01677	1.0171	0.996945
960	1.02039	1.00413	1.00603	1.02211	1.00766	1.00181	1.02517	1.01896	1.00557	1.02021	1.00534	1.02026	1.05292	1.00985	1.04097	1.03436	1.03809	1.04241	1.03725	1.02302	1.01473	1.01703	1.025	1.00524	1.01516	1.03026	1.00331	1.02937	0.989445	1.02049	1.05321	1.00307	1.00231	1.0345	1.02974	1.02356	0.999398	1.03748	1.00775	1.00999	1.00579	1.01875	1.01215	1.00798	1.01368	1.01215	0.996224	1.00849	0.994545
962	1.01299	1.00153	1.02261	1.01995	1.01128	1.00371	1.02818	1.03473	1.01875	1.01604	0.999735	1.02512	1.05286	0.996251	1.0419	1.03721	1.04891	1.07172	1.04053	1.03085	1.03078	1.01631	1.02676	1.01535	1.0134	1.02281	1.00624	1.02415	0.997614	1.01725	1.04574	1.01009	1.00918	1.03928	1.04334	1.026	1.00058	1.02004	1.0172	1.01165	1.01555	1.01044	1.02794	0.995819	1.01535	1.01648	0.994808	1.0143	0.985146
964	1.00831	0.990548	1.01372	1.00631	1.00303	1.00798	1.0198	1.03464	1.02208	1.0175	1.00655	1.02072	1.03883	0.997677	1.03031	1.02831	1.04412	1.06941	1.04963	1.02841	1.03305	1.02637	1.0215	1.02351	1.0125	1.01522	1.00767	1.01786	1.00491	1.0092	1.04552	1.0154	1.00977	1.03619	1.03732	1.02059	1.00358	0.998241	1.00725	1.01147	1.02084	1.0055	1.02666	0.991475	0.9964	1.01669	0.984654	1.0097	0.984991
966	1.0174	0.998523	1.02036	0.998801	0.998739	0.996464	1.03314	1.04076	1.02275	1.01152	1.00416	1.0224	1.03508	1.0121	1.0304	1.02422	1.03276	1.0504	1.05858	1.02481	1.01807	1.02315	1.01088	1.01914	1.02356	1.00803	1.0025	1.00225	0.998006	1.00134	1.04343	1.01056	1.01218	1.03328	1.03009	1.02532	1.00443	1.00317	1.01864	1.01156	1.01574	0.998813	1.02847	1.00171	0.989275	1.00477	0.997763	1.03005	0.979964
968	1.01109	1.01985	1.03291	1.0098	0.99658	1.0048	1.03135	1.04363	1.03248	1.02091	1.01294	1.03548	1.03369	1.01843	1.02539	1.03835	1.01094	1.04403	1.04987	1.02373	1.02889	1.03645	1.00994	1.02246	1.01692	1.00872	1.00384	1.00413	0.996762	1.0179	1.0345	1.00995	1.01309	1.04615	1.04279	1.02485	0.984104	1.00217	1.00827	1.01331	1.02378	1.0293	1.04457	1.01302	0.98581	1.01572	1.00755	1.0227	0.997762
970	1.01608	1.02257	1.03951	1.01527	1.01184	1.00781	1.02637	1.04234	1.03383	1.04613	1.02731	1.02775	1.02443	1.01893	1.03175	1.05314	1.02416	1.04537	1.05021	1.02625	1.02983	1.04897	1.01654	1.02112	1.01951	1.03062	1.01795	1.00542	1.02081	1.02418	1.02841	1.01137	1.02094	1.04784	1.0358	1.03784	0.997539	1.02187	1.00429	1.00502	1.02907	1.02105	1.04766	1.01471	0.998121	1.00987	1.01013	1.01613	0.988989
972	1.03074	1.02326	1.02195	1.01555	1.00559	1.00877	1.01891	1.03024	1.02479	1.04468	1.02297	1.03022	1.03994	1.02216	1.03811	1.06694	1.02598	1.01919	1.04212	1.03066	1.02351	1.04309	1.00655	1.01863	1.0091	1.03236	1.00698	1.01933	1.0065	1.03679	1.02977	1.00406	1.02108	1.04553	1.03935	1.04018	1.01828	1.02791	0.989717	1.00262	1.01727	1.03395	1.03261	1.04113	1.01298	1.00726	1.0178	1.01574	0.987069
974	1.02524	1.02056	1.02232	1.02494	1.00432	1.00497	1.01388	1.02797	1.02559	1.04454	1.02461	1.02966	1.03604	1.02184	1.04452	1.05736	1.03356	1.01618	1.02842	1.02694	1.01884	1.02842	1.01274	1.01931	1.01034	1.03076	1.00686	1.01931	1.00044	1.05762	1.02224	0.992286	1.0173	1.04489	1.03865	1.03114	1.02294	1.03466	0.997521	1.00623	1.00046	1.02501	1.02303	1.04874	1.03167	1.00562	1.02825	1.01037	0.986799
976	1.01595	1.01799	1.01586	1.02343	1.00913	1.01087	1.00462	1.02647	1.01525	1.03676	1.02677	1.02999	1.03763	1.01695	1.04397	1.04855	1.04394	1.01571	1.02317	1.01645	1.0148	1.01593	1.01203	1.02078	0.992007	1.03497	1.01155	1.02892	1.00117	1.05879	1.01757	0.999077	1.0193	1.04512	1.04228	1.02173	1.0274	1.03247	0.994182	1.0077	1.00413	1.0194	1.02042	1.03672	1.03763	1.00889	1.0319	0.99267	0.992576
978	1.00176	1.02287	1.00501	1.03301	1.00311	0.998122	0.996816	1.02526	1.0095	1.02689	1.02245	1.02712	1.03202	1.01862	1.05492	1.05139	1.04797	1.01472	1.01802	1.02544	1.01795	1.00378	1.01418	1.02511	1.00062	1.03445	1.00552	1.01613	0.998842	1.04456	1.02461	0.999691	1.0251	1.04521	1.0375	1.03217	1.03168	1.02867	0.996355	1.01221	0.995624	0.999885	1.01105	1.03741	1.04431	1.00435	1.02407	1.00802	0.993563
980	1.00668	1.02186	1.004	1.01669	0.992885	0.990423	0.982164	1.01024	1.00036	1.01501	1.00459	1.01965	1.03242	1.01034	1.04717	1.03392	1.0481	1.00534	1.01476	1.02874	1.02195	0.999689	0.996611	1.02373	0.989656	1.01356	1.00291	1.00512	0.983516	1.04054	1.02015	0.99817	1.01823	1.03024	1.02494	1.01989	1.02192	1.00588	0.989494	1.0049	0.995072	1.00851	1.00923	1.04175	1.03544	1.00512	1.02002	1.01373	0.986767
982	1.01963	1.02262	1.01458	1.01474	0.999961	0.994999	0.995733	1.01971	0.99805	1.00846	1.00574	1.01929	1.02209	1.01647	1.04307	1.01532	1.05052	1.00128	1.01375	1.03461	1.01948	1.01359	0.997385	1.02109	0.996171	1.00608	1.01175	1.00128	0.985667	1.04008	1.02011	0.990027	1.01508	1.02625	1.0126	1.0206	1.00583	1.00448	0.998185	1.01201	1.00029	1.00725	1.0169	1.02073	1.0164	0.996819	1.01574	1.02189	0.992246
984	0.995051	1.02468	1.0188	1.00677	0.997278	0.991902	0.99196	1.02827	0.989236	1.01846	0.993204	1.00992	1.01667	1.01643	1.03208	1.01669	1.05678	1.00654	1.00904	1.03515	1.01499	1.01893	1.00925	1.00601	0.979152	1.00988	1.01641	0.992695	0.986869	1.01947	1.01414	1.01132	1.0216	1.02614	1.00332	1.0231	0.991553	1.00584	0.998985	1.00902	1.01129	1.006	1.02	1.00555	0.991453	0.995081	1.00756	1.02576	0.993854
986	1.00842	1.01996	1.02676	0.996783	0.986378	0.987875	0.993432	1.0284	0.987534	1.01834	0.988641	1.01284	1.01071	1.0224	1.02015	1.03827	1.05071	0.999456	1.003	1.044	1.00918	1.02992	1.01043	1.00166	0.990259	0.999439	1.01497	0.98909	0.991623	1.02358	1.013	1.00484	0.999435	1.02297	1.00185	1.024	0.993448	1.00906	0.981182	1.00869	0.994329	1.00987	1.01471	1.00699	0.990918	0.999451	0.99859	1.01643	0.987217
988	0.995601	1.01778	1.03033	0.980932	0.991055	0.988741	0.994383	1.0207	0.98323	1.01679	0.999433	1.01229	1.0097	1.01365	1.00405	1.02764	1.04845	0.998185	1.00263	1.0295	1.0017	1.03093	1.01267	0.994606	0.975279	0.999784	1.01568	0.996958	0.991119	1.02697	1.01352	1.00029	0.991783	1.0157	1.01327	1.02126	0.992569	1.014	0.977625	1.00633	0.998199	1.01131	1.01376	1.00585	0.990595	1.00653	1.00688	1.01617	0.990113
990	0.998904	1.02674	1.02223	0.993512	0.992437	1.00275	1.00141	1.03696	0.978409	1.00982	1.00231	1.0105	0.998765	1.0139	1.00012	1.02543	1.03623	0.990013	1.00807	1.01588	1.00308	1.02366	1.02189	0.99482	0.98273	1.00114	1.02225	0.99315	0.994922	1.03426	1.01577	0.996659	0.990025	1.02888	1.0294	1.01983	0.997045	1.00624	0.975875	1.01635	0.996537	1.00219	1.00611	1.0062	0.997358	1.00577	1.00473	1.02112	0.998291
992	1.01675	1.01619	1.01247	0.985827	0.999779	1.00152	0.993881	1.02786	0.985561	1.00782	1.00823	0.993992	0.994718	1.0066	0.999532	1.02942	1.02425	0.998351	1.01776	1.00272	1.01171	1.01927	1.02251	0.9898	0.983984	1.00657	1.0218	0.989015	0.99552	1.02314	1.01605	1.00359	0.988715	1.03107	1.03149	1.01655	1.0077	0.999871	0.967087	1.0038	0.991098	1.00375	0.998444	1.01698	1.00442	1.01487	1.00659	1.00439	0.995334
994	1.00165	1.01635	1.01287	0.999731	1.00784	1.00063	1.00411	1.02469	0.987121	1.00172	1.01132	0.988846	1.00622	1.00452	1.01145	1.02814	1.02046	0.98912	1.01618	1.001	1.01643	1.02521	1.00483	1.00008	1.00016	1.0224	1.02837	0.997604	1.00781	1.03664	1.02902	0.998551	0.998391	1.03113	1.0465	1.02533	1.01866	1.00931	0.963025	1.00265	0.992509	1.01252	1.00107	1.01765	1.02436	1.00361	1.00896	0.997765	0.984561
996	1.00457	1.01854	1.00136	1.00133	1.02391	0.998147	1.00608	1.02408	1.00175	1.01245	1.00667	0.97671	1.01186	1.00515	1.01626	1.01004	1.02844	1.00281	1.00859	0.99999	1.03301	1.013	1.0123	1.00214	1.00837	1.02721	1.03405	0.997324	1.00524	1.04093	1.02465	0.982175	0.999461	1.03066	1.04718	1.02637	1.01935	1.00647	0.967897	1.00126	1.00653	1.016	1.01226	1.01885	1.0263	1.00405	1.01429	1.01672	0.995422
998	1.00847	1.01419	0.995593	0.99344	1.0117	0.98942	1.00519	1.00813	1.00481	1.02081	0.995567	0.969647	1.0088	1.016	1.03206	1.00037	1.03053	1.0078	1.0107	1.0145	1.03727	1.00657	1.01022	0.995982	1.00977	1.02889	1.02239	0.997754	1.00758	1.02609	1.01396	0.97414	1.00481	1.02844	1.02868	1.01124	1.01637	1.00025	0.966361	1.0004	0.993098	1.01334	1.01179	1.01676	1.01742	0.991322	1.00683	1.01801	0.982382
1000	1.0065	1.00097	0.996481	0.983776	1.00432	0.976448	1.0018	0.998205	1.00172	1.03022	0.999444	0.966482	1.01095	1.01474	1.03404	0.993082	1.03229	1.0126	0.992125	1.02084	1.02565	1.00939	1.00269	0.985207	1.0079	1.02576	1.00634	1.01686	0.995412	1.01561	1.00527	0.9668	1.0069	1.02535	1.02741	1.00365	1.01092	0.997693	0.965902	0.991566	0.982025	1.00751	1.01154	1.00659	1.00856	0.986908	1.01246	1.01614	0.978689
1002	1.00844	1.00862	0.983337	0.985448	0.997764	0.969797	0.996639	0.996674	0.993065	1.03811	0.990174	0.975201	1.01788	1.00971	1.02275	0.995208	1.02931	1.01529	0.98763	1.02499	1.01531	0.997133	0.999015	0.981581	1.00049	1.03067	1.0108	1.00462	0.993975	1.02089	1.00774	0.962277	1.0049	1.01061	1.01947	0.996967	0.999015	1.00019	0.971111	0.984802	0.984103	0.998402	1.00597	1.00223	1.00159	0.979164	1.01045	1.01602	0.979761
1004	0.987631	1.00877	0.983735	0.973182	1.00542	0.965448	0.997337	0.991484	0.993298	1.03743	0.992453	0.995192	1.01131	1.01488	1.0364	0.997898	1.02695	1.022	0.992984	1.02082	1.01377	1.00139	0.995368	0.970487	0.998318	1.01057	1.00543	1.01656	0.97489	1.00912	0.989589	0.951128	0.998008	1.0052	1.01075	0.997708	0.995556	1.00173	0.973647	0.990146	0.979483	0.999159	1.00017	0.996537	0.991133	0.983843	1.01179	1.01456	0.990015
1006	0.995156	1.01046	1.003	0.992103	1.00252	0.957634	1.00457	0.995805	0.989908	1.0252	1.00252	0.996682	1.00114	1.00608	1.04086	1.00959	1.01708	1.02978	1.00829	1.02757	1.01015	1.00674	0.991611	0.972954	1.0024	1.03131	0.999754	1.01597	0.97439	0.997643	1.01208	0.963109	0.997429	1.00573	1.01453	0.990733	0.996948	0.99598	0.973709	0.99607	0.980956	0.992646	0.991141	1.00537	0.990705	0.983067	1.00281	1.01904	0.984412
1008	0.999643	1.00517	1.00408	0.9893	1.01396	0.963572	1.00762	1.00901	0.996233	1.01498	1.01214	1.00413	1.01949	1.00619	1.03451	1.02174	1.01797	1.03167	1.0069	1.02282	1.00927	1.01676	0.994326	0.979761	0.997188	1.03239	1.01909	1.01168	0.974983	1.00998	1.0134	0.979503	1.00196	1.01725	1.02448	0.999782	0.994872	0.992583	0.97629	0.99006	0.997176	1.00495	1.00343	1.0111	0.999331	0.98898	1.00352	1.01395	0.997256
1010	1.016	1.00963	0.99876	0.996568	1.02017	0.972286	1.00887	1.02328	0.999591	1.00083	1.00752	1.00971	1.03202	1.01049	1.02163	1.03059	1.01216	1.03183	1.02605	1.01692	1.02497	1.02101	0.99958	0.995936	0.995193	1.04428	1.02303	1.00745	0.974371	1.00895	1.02774	0.992336	0.997773	1.03312	1.02909	1.01449	0.995812	1.00546	0.985751	0.999804	1.00181	1.01178	1.01286	1.02802	1.00494	1.00032	1.01319	1.00668	1.00479
1012	1.02815	1.00479	1.00783	0.993233	1.01384	0.971862	1.00802	1.02672	1.01228	0.986425	1.01688	1.00203	1.02265	1.01879	1.02863	1.03899	1.01408	1.02132	1.01936	1.01709	1.02437	1.01848	1.0014	1.00223	0.990907	1.03923	1.01482	1.01171	0.979349	1.00526	1.02157	0.992108	1.01873	1.04151	1.03381	1.01937	0.991852	0.99512	0.987502	1.0095	1.00721	1.01472	1.01185	1.0188	1.0071	1.00425	1.00985	1.01027	1.0031
1014	1.00673	0.999907	1.00667	0.995667	1.00577	0.972738	1.00849	1.02106	1.01305	0.976597	1.02126	0.990154	1.0214	1.01467	1.00574	1.03779	1.01893	1.02847	1.01426	1.00834	1.01461	1.01263	1.00458	1.01285	0.986451	1.04655	1.00601	0.994165	0.984243	1.0041	1.03779	0.996745	1.01869	1.04049	1.02775	1.02221	0.990373	0.986513	0.984429	1.00745	1.00323	1.01222	1.02611	1.02761	1.01736	1.00706	1.00091	1.0101	1.00071
1016	0.98753	0.990542	0.988912	0.973903	0.99623	0.980959	1.00192	1.0162	0.997915	0.980496	1.01135	0.981647	1.02239	1.00971	0.987612	1.03935	1.01012	1.01117	1.01433	0.995073	1.00385	1.00949	1.00171	0.99791	0.969849	1.0306	1.00789	0.996108	0.992787	1.01309	1.02698	0.999762	1.02342	1.02308	1.02676	1.01929	0.983338	0.987051	0.978409	1.00537	1.00799	1.01596	1.02831	1.01225	1.01745	1.0129	1.00163	0.985677	1.00632
1018	0.996298	0.996035	0.996467	0.978847	0.998358	0.981076	0.99623	1.02272	0.993333	0.974113	0.99381	0.976064	1.01008	1.00304	0.987232	1.04165	1.00815	0.99276	1.02396	0.994152	1.00249	1.00698	1.00801	1.00239	0.972929	1.02429	1.00278	0.993372	0.992178	1.01246	1.02492	0.99009	1.01176	1.00923	1.03062	1.01261	0.988084	0.9875	0.976086	1.02151	0.990026	1.00031	1.00916	1.00068	1.01433	1.01162	1.00712	0.969341	1.00236
1020	0.991999	0.99863	1.00826	0.984988	0.991363	0.971144	1.00731	1.01382	1.00308	0.986118	0.993352	0.980654	0.995189	1.01478	1.01191	1.03503	1.01744	0.987546	1.02299	1.0065	1.00294	0.998424	1.00518	1.00804	0.97901	1.01755	1.0043	0.985976	0.989457	1.01615	1.0277	0.992665	1.02713	0.993	1.02612	1.01342	0.981955	0.988989	0.968541	1.02014	0.995218	1.00656	0.999454	0.989074	1.00917	1.00232	1.01065	0.979195	1.00137
1022	1.00677	0.990835	1.01131	1.0044	1.00695	0.97912	1.01274	1.01129	0.995374	0.998474	0.986856	0.997289	1.00328	1.01792	1.01579	1.02969	1.01781	0.998614	1.03251	1.01234	1.01803	1.01549	1.01141	1.0065	0.995803	1.02004	1.01329	0.992615	0.983591	1.01924	1.03836	1.0033	1.02003	1.00096	1.02636	1.02843	0.993379	0.997926	0.978491	1.02266	0.997525	1.01421	1.01116	1.00727	1.00833	0.998085	1.01628	0.974635	0.995508
1024	1.00313	0.988294	1.01038	1.00218	0.998424	0.987481	1.00275	1.01528	1.00457	1.01684	0.983063	0.999761	1.00963	1.01303	1.01639	1.04242	1.00338	0.986035	1.03814	1.02927	1.01701	1.00907	1.01134	1.00741	0.999244	1.00757	1.01711	1.00457	0.9869	1.01501	1.03677	1.00617	1.01837	1.00447	1.03219	1.02471	0.999191	0.999187	0.989213	1.01918	0.992589	1.01099	1.00242	1.0038	0.994853	0.985745	1.01565	0.978808	0.993977
1026	1.01961	0.99163	1.01215	1.00904	0.996953	0.989697	1.00467	1.014	1.02052	1.01557	0.990028	1.02043	1.01601	1.02182	1.02108	1.03588	1.01899	0.991815	1.04543	1.05	1.01831	1.00517	1.01723	1.0084	0.99895	1.00796	1.00577	1.00007	0.97865	1.01159	1.03552	0.995845	1.02344	1.01406	1.03166	1.02745	1.00125	1.00504	0.999989	1.01723	0.985306	1.02323	1.00461	1.00986	0.999008	0.971522	1.02727	0.989444	0.981532
1028	0.99426	0.993069	1.00394	1.02024	0.995817	1.00473	1.02351	1.0088	1.02877	1.03121	0.995641	1.02523	1.01568	1.01709	1.01107	1.03452	1.02643	1.01225	1.04758	1.0551	1.0262	0.996274	1.01572	1.0085	1.007	1.02309	1.00505	1.00525	0.984397	1.00824	1.05536	0.997978	1.02809	1.02045	1.02444	1.03907	1.00758	1.01857	1.01954	1.01253	1.00033	1.03827	1.0214	1.01436	0.982884	0.981565	1.02791	1.01108	0.982522
1030	1.0112	0.991105	1.00136	1.00661	1.00457	1.00764	1.01937	1.01578	1.0202	1.02495	0.995337	1.0271	1.03583	1.00758	0.99978	1.0398	1.02405	1.00881	1.03477	1.04709	1.01097	0.991496	1.02127	1.00198	1.00338	1.02399	1.00513	1.01197	0.990122	1.00549	1.03747	0.988377	1.01095	1.02063	1.01584	1.03858	1.01655	1.00939	1.01493	1.01485	1.00443	1.03483	1.02506	1.01672	0.978852	0.977519	1.02959	1.0114	0.985357
1032	1.03529	1.00175	1.00774	0.998595	0.983079	1.00385	1.01716	1.00428	1.00812	1.01715	1.00441	1.01669	1.03204	1.0054	0.987798	1.0431	1.01686	0.999804	1.02716	1.03263	1.0031	0.986336	1.01698	0.999819	0.999557	1.02686	0.996728	1.01346	0.992197	1.01508	1.02888	0.980014	1.00597	1.00793	1.02144	1.028	1.0169	1.01105	1.01394	1.02027	0.99017	1.03053	1.02207	1.00733	0.990268	0.982048	1.02868	1.02241	0.998269
1034	1.00009	1.00332	1.0032	0.998826	0.988452	0.999175	1.02255	1.00402	0.993496	1.00685	1.00006	1.0123	1.02852	1.00387	0.987415	1.03272	1.02179	1.00361	1.02781	1.01344	1.00743	0.988993	1.01727	0.99243	1.0031	1.03452	0.994346	1.01466	0.986819	1.02489	1.03071	0.971901	1.00283	1.02517	1.00513	1.0276	1.0206	1.01222	1.00916	1.02633	0.999129	1.03045	1.02314	1.01222	1.00656	0.99778	1.03955	1.02296	0.996261
1036	0.997862	0.999757	0.991811	0.997595	0.983607	1.00188	1.02613	1.00247	0.985026	1.0069	0.998975	0.996385	1.02446	1.00025	0.995002	1.01796	1.00417	0.99549	1.00891	1.00199	1.01279	0.995229	1.01498	1.01212	0.996147	1.02992	1.0051	1.0199	0.985017	1.01542	1.02836	0.978553	1.00648	1.02511	1.00188	1.0246	1.02411	1.01009	1.00792	1.02559	1.00293	1.01855	1.0277	1.00858	1.00709	1.00297	1.02004	1.01963	0.997397
1038	0.995427	0.993188	0.986005	0.985057	0.956474	0.987155	1.00351	1.00395	0.979497	1.00226	0.993692	0.98504	1.02569	1.00228	1.00736	1.01931	0.988001	0.986755	0.995936	0.988951	1.00157	1.00586	1.0056	1.00355	0.994434	1.01729	1.00587	1.01341	0.975822	1.01647	1.0073	0.981407	1.00959	1.02255	0.993771	1.00795	1.01793	0.993681	0.994873	1.02092	0.99929	1.01153	1.01266	0.99912	1.01454	1.00159	1.01813	1.01236	1.00241
1040	0.991456	0.986095	0.977505	0.99476	0.948477	0.989603	1.00247	0.994314	0.979766	1.0064	1.00323	0.979695	1.02076	1.00082	1.00625	1.01524	0.977291	1.00179	1.00358	0.980948	1.01503	1.01655	0.999025	1.00232	0.992016	1.02072	1.01138	1.01525	0.976534	1.02074	1.0221	0.980744	1.01113	1.01151	0.998158	1.00559	1.0197	0.990791	1.00131	1.01721	0.987318	1.00502	1.02029	1.00361	1.02571	1.0171	1.01757	1.00959	1.00038
1042	0.998418	0.986227	0.969992	0.982322	0.965712	0.985297	0.999901	1.01022	0.983245	1.00458	1.00577	0.989144	1.01249	0.995443	1.00751	1.00681	0.982347	1.00608	1.00862	0.989174	1.01748	1.00405	0.992751	1.0026	0.986159	1.0099	1.00995	1.01841	0.980256	1.01697	1.02429	0.977434	1.01446	1.00744	0.993826	0.997499	1.00691	0.992285	0.989139	1.0024	0.996035	1.00235	1.0198	1.00259	1.01624	1.013	1.01621	1.00208	0.990323
1044	1.00324	0.990653	0.97396	0.974703	0.968066	0.982066	0.997003	1.00443	0.995609	1.00442	1.00697	0.996252	1.00634	1.00743	1.00606	1.00755	0.97673	1.00707	1.00747	0.985256	1.02593	0.999757	0.999593	1.01013	0.970606	1.01432	1.00541	1.01229	0.980728	1.01762	1.02099	0.984683	1.022	0.980168	1.01279	0.989303	1.00293	0.993101	0.983431	0.993713	0.993834	1.0093	1.0187	0.997571	1.00844	1.01201	1.0176	1.00377	0.999263
1046	0.98999	1.00173	0.993699	0.98904	0.976136	0.986378	1.00141	1.0145	1.00563	1.00677	1.01307	1.01197	1.0164	1.01066	1.01069	1.02569	0.995496	1.02816	1.03104	0.995879	1.0313	0.997288	0.997259	1.00757	0.97543	1.01979	1.00558	1.02217	0.998339	1.0326	1.03084	0.987732	1.02999	0.982422	1.01735	0.99541	1.00577	0.992461	0.9942	1.00197	0.996877	1.01257	1.02577	1.00896	1.00732	1.01284	1.02959	1.00841	1.00908
1048	0.99767	1.0001	0.999735	0.986652	0.991643	0.991387	1.00784	1.00174	1.00256	1.00671	1.01943	1.02133	1.00786	1.0074	0.991451	1.01087	0.992151	1.02661	1.03071	0.99666	1.02347	0.992461	0.995086	1.00507	0.968383	1.01199	0.990372	1.02666	1.0001	1.02995	1.03763	0.976768	1.02758	0.978366	1.01514	1.00078	1.00144	0.993797	0.997374	0.994076	1.00041	1.0099	1.02421	1.01047	1.0218	0.998928	1.02659	0.991044	0.995254
1050	1.02527	1.00651	1.01387	0.974008	1.00326	0.998149	1.01515	1.00857	1.00172	1.00484	1.01521	1.0207	1.00266	1.01365	0.99302	1.02558	1.02117	1.01216	1.04058	1.01317	1.007	0.997577	1.00061	0.99967	0.981439	1.01566	0.991273	1.02286	0.999799	1.02739	1.03281	0.977668	1.02742	1.00419	1.02208	0.995388	0.996093	1.01496	0.989918	0.99893	1.01369	1.01055	1.02052	0.998485	1.01592	0.988534	1.02677	1.00128	0.996016
1052	0.98911	1.01223	1.00764	0.97271	0.994731	0.995638	1.01528	1.00704	1.00171	1.00139	1.00578	1.01491	1.01202	1.01746	1.00056	1.028	1.00697	1.01171	1.03491	1.01395	1.00414	1.014	1.00766	0.992196	0.987647	1.02423	0.993075	1.0104	1.00218	1.02819	1.023	0.979996	1.01665	1.01437	1.01532	0.997017	0.99957	1.00668	0.980753	0.997883	1.01387	1.02043	1.02963	1.00241	1.01283	0.991458	1.02608	1.00185	0.995396
1054	1.01388	1.01344	1.01411	0.98746	0.994339	0.99384	1.01853	1.02028	0.994978	1.00465	1.00783	1.01561	1.02332	1.01383	1.01354	1.02241	1.01813	1.01918	1.03329	1.0394	1.00843	1.01551	1.01338	0.99454	0.998253	1.0383	1.00777	1.01361	1.00124	1.03283	1.03095	0.975373	1.01582	1.02173	1.0042	0.997769	0.994257	1.00974	0.976719	1.0089	1.01695	1.02102	1.02717	1.01429	1.01731	0.998089	1.02761	1.00313	0.994414
1056	0.988065	1.00681	1.00732	0.979401	0.991064	0.989177	0.999128	1.01284	0.988368	1.00081	1.00336	1.00836	1.01976	1.0095	1.00782	1.01107	1.00467	0.99964	1.01278	1.02492	0.998817	1.01346	1.02256	0.988919	1.00102	1.02916	1.00116	0.996299	0.994483	1.01987	1.03179	0.970792	0.993698	1.01643	1.00186	0.98661	0.986272	1.00385	0.965442	1.00118	1.01161	1.01153	1.01759	1.00362	1.02255	1.00728	1.02965	1.01206	1.00032
1058	1.01265	1.01177	1.01382	0.986429	0.994022	0.972751	1.00582	1.02058	0.988419	0.994861	1.00436	1.00721	1.02381	1.01132	1.00846	1.01069	1.01151	0.998796	1.0033	1.01722	1.00173	1.00532	1.01476	0.981707	0.998943	1.03354	1.00971	0.990625	0.989982	1.02671	1.02922	0.969714	0.983872	1.02737	1.00218	0.984478	0.986689	1.00965	0.96139	0.992254	1.00153	1.00654	1.01433	0.999916	1.00964	0.998613	1.02467	1.0167	1.00994
1060	0.997622	1.00614	1.00926	0.984649	0.999667	0.98201	0.999925	1.01243	0.97792	1.00985	1.00495	1.007	1.02613	1.00236	1.00865	1.01031	0.992572	1.01056	0.999797	1.01534	1.00929	1.00595	1.01123	0.98611	0.99183	1.03945	1.00296	0.987382	0.990899	1.02854	1.02857	0.969124	0.981502	1.00578	0.99284	0.990286	0.992214	1.00236	0.976216	0.987208	1.00018	1.00416	1.01606	1.00184	1.01205	0.993141	1.01466	1.011	1.0027
1062	0.989117	1.00546	1.01668	0.98439	0.998347	0.998266	1.01078	1.01398	0.98508	1.02377	1.00837	1.01812	1.02104	0.996657	1.00783	1.02196	1.01109	1.01156	1.01609	1.02004	1.01615	0.993509	1.02199	0.993381	0.989272	1.04756	1.00878	1.00251	0.9856	1.03543	1.04026	0.976201	0.987313	1.00118	0.999367	0.993153	0.993962	1.00385	0.992031	0.993688	0.995185	0.984554	1.00314	1.0066	1.01922	0.998815	1.01387	1.00893	1.00744
1064	1.00373	1.01265	1.01979	0.984167	1.00479	1.00399	1.00344	1.02209	0.993249	1.02629	1.01646	1.02245	1.01653	0.999863	1.00986	1.03202	1.02109	1.00998	1.01466	1.0091	1.01326	1.01	1.01574	0.989923	0.99539	1.03519	1.00809	0.995315	0.988362	1.03651	1.037	0.987668	0.975925	1.00769	1.00501	0.992888	1.0056	0.99412	0.991969	0.993301	1.00841	0.994265	1.00945	0.992997	1.01309	0.990132	1.01017	1.01741	0.99945
1066	1.00814	1.00291	1.01716	0.985616	1.01182	1.001	1.01251	1.01893	0.990749	1.02081	1.01463	1.01796	1.01294	1.01021	1.01088	1.03916	1.02848	1.01192	1.01303	1.00867	1.0095	1.00953	1.00213	0.988366	1.00892	1.03926	1.02142	1.01557	0.979515	1.04154	1.02315	0.997035	0.987912	1.0202	0.995356	1.00826	1.00618	1.00472	0.994791	0.987336	1.01639	1.00447	1.00028	0.988499	1.0087	0.9889	1.01194	1.01062	0.999207
1068	1.02045	0.993258	1.01136	0.979165	1.0127	1.01341	0.998905	1.02915	0.986154	1.01933	1.01612	1.01008	1.0096	1.0067	1.01525	1.05492	1.03803	1.00993	1.02441	1.01753	1.00722	1.01447	1.01153	0.982078	1.01069	1.04981	1.02688	1.01549	0.988168	1.03717	1.03192	1.00204	0.997051	1.00424	1.00407	1.00822	1.00416	0.992717	0.986892	0.997292	1.01262	1.01454	1.0114	0.994833	1.01788	0.994223	1.02063	1.00645	0.989266
1070	1.00791	0.993012	1.01358	0.978759	1.01249	0.999889	1.00587	1.03937	0.99489	1.00992	1.01125	1.01946	1.0247	1.02381	1.01635	1.04549	1.03877	1.01223	1.01901	1.019	1.01412	1.01084	1.02194	0.987965	1.01921	1.02687	1.03655	1.02339	0.992004	1.03552	1.0355	1.01377	1.01062	1.01191	1.01867	1.0006	1.00501	0.995984	0.991248	0.990561	1.01155	1.02698	1.01182	1.00872	1.01953	1.00359	1.02696	0.995653	0.995583
1072	0.993374	0.990213	1.01668	0.991333	1.01658	0.989057	0.99711	1.03165	0.995853	1.00393	1.00362	1.00043	1.03727	1.02757	1.01901	1.04296	1.0327	0.998721	1.00721	1.01074	1.00607	1.01171	1.01657	0.977164	1.01052	1.02195	1.02714	1.01042	0.989213	1.02482	1.03443	0.999319	1.00321	1.01814	1.00733	0.992852	1.00647	0.994039	0.993574	0.998736	1.00573	1.03229	1.01837	1.00078	1.01697	0.995929	1.01762	0.988279	0.994347
1074	1.02432	0.977895	1.00607	0.978304	1.00941	0.986894	0.994462	1.01557	0.989053	1.00147	0.993889	0.994679	1.04004	1.03058	1.00935	1.04332	1.0194	0.995565	1.0029	1.01112	1.0053	0.99233	1.01461	0.982215	1.00818	1.02443	1.01614	1.0083	0.989851	1.01812	1.03739	0.985475	1.00303	1.01483	1.01104	0.993724	1.01583	0.99913	0.996516	0.997346	1.00115	1.02133	1.01313	0.993154	1.02978	0.989555	1.00723	0.97862	0.992584
1076	0.983993	0.993713	1.01321	0.986494	1.00831	0.979392	0.981665	1.02195	0.993312	1.01776	0.995179	0.993146	1.04065	1.02779	1.01621	1.05165	1.0241	1.008	1.00674	1.01638	1.00396	0.997998	1.01779	0.989731	1.00823	1.02285	1.00455	0.992612	0.986818	1.01944	1.04427	0.975175	1.00093	1.00447	1.02111	0.988757	1.02172	0.994804	1.00169	1.00956	0.994506	1.01587	1.00996	1.0019	1.03406	0.986652	0.990522	0.977933	0.979662
1078	0.999775	1.00296	1.01137	0.983832	1.01618	0.985298	0.98694	1.02439	0.997448	1.03797	0.983775	1.0012	1.04822	1.03936	1.01519	1.05929	1.01388	1.01634	1.00677	1.00887	1.01419	1.00401	1.01782	1.01289	1.00713	1.01312	1.00103	0.999511	0.988066	1.03101	1.02909	0.975279	1.01052	1.01198	1.01906	0.990331	1.02772	0.999902	1.00354	1.0151	0.996157	1.01121	1.00848	1.00458	1.0327	0.987155	0.984166	0.983861	0.980507
1080	1.01218	1.00074	1.00182	0.991206	1.01027	0.986977	0.975304	1.01265	0.995843	1.02359	0.98731	0.987743	1.02961	1.03284	1.00899	1.05899	1.00985	1.00581	0.996596	0.997644	1.01021	1.00516	1.01011	1.00636	1.00391	1.02781	0.990323	0.993842	0.978685	1.0205	1.02443	0.967028	0.99599	1.00885	1.00385	0.990502	1.02029	0.990084	0.994787	1.01349	0.985098	0.999047	0.993306	0.996929	1.0175	0.988046	0.978348	0.986466	0.97033
1082	1.00945	0.992024	1.01732	0.99011	1.01845	0.994795	0.975857	1.02315	0.993202	1.03224	0.984519	0.994297	1.01678	1.04127	1.01171	1.05151	1.0085	1.01841	0.995804	0.990337	1.01297	1.01355	1.00425	1.00771	0.99947	1.02856	0.990529	0.988479	1.00002	1.02561	1.02256	0.982075	1.01234	1.00271	1.01269	0.996324	1.02745	0.993865	0.998861	1.00838	0.995709	1.00293	0.994861	1.00315	1.01801	0.989015	0.987111	0.999031	0.968136
1084	0.990933	1.00806	1.0152	0.993568	1.01929	0.999765	0.986572	1.02106	0.988268	1.0367	0.989489	0.983204	1.01986	1.03668	1.00989	1.03821	1.01849	1.02009	0.998603	0.999409	1.01518	1.0171	1.01131	0.989897	0.992967	1.02394	0.992897	0.986104	1.00116	1.01778	1.00768	0.975212	1.02289	1.00162	1.02597	0.996879	1.02489	0.98653	0.998135	1.00602	0.989832	0.99495	0.998459	1.0232	1.00805	0.98365	1.00595	0.995517	0.965285
1086	1.00775	0.998666	1.00916	0.977264	1.01761	1.0052	0.985605	1.01295	0.979434	1.03196	0.985589	0.989741	1.01128	1.02775	1.003	1.01683	1.01084	1.01952	0.998342	0.980761	1.01432	1.01402	1.01396	0.971017	0.969321	1.02195	0.983537	0.981858	1.00751	1.01549	1.00562	0.980783	1.01876	1.00359	1.02656	0.994386	1.02815	0.995075	0.988411	0.998683	0.981402	0.999955	1.01259	1.02315	0.995986	0.977175	1.01505	0.987781	0.973529
1088	1.00332	1.00289	1.00571	0.988906	1.00887	1.00243	0.994095	1.00346	0.981467	1.01719	0.99629	0.982043	1.01245	1.01329	1.01165	1.00103	1.02732	1.0128	0.994975	0.983267	1.01923	1.01448	1.01223	0.96901	0.974055	1.02492	0.983446	0.985383	1.00175	0.996807	1.00662	0.994911	1.01437	1.00219	1.02904	0.996849	1.0388	1.00011	0.996922	0.991864	0.982469	1.00251	1.00744	1.02004	0.989515	0.980822	1.02178	0.993989	0.983123
1090	0.998755	1.01118	1.01274	0.998836	1.01027	1.00188	1.00369	0.999241	0.98906	1.02809	0.994716	0.997918	1.01783	1.00908	1.01433	0.998003	1.01932	1.0185	1.00515	0.985866	1.02912	1.01896	1.00583	0.964528	0.965854	1.0237	0.980856	0.981044	1.00776	1.01296	1.00285	1.00326	1.01571	0.998892	1.03782	1.00765	1.0414	1.0013	0.994121	1.00321	0.980311	1.02142	1.0218	1.01433	0.998382	0.975569	1.01147	0.994002	1.00241
1092	1.01057	1.0215	0.988157	0.99845	1.00489	0.99261	0.996509	0.991871	0.991971	1.02365	0.989459	0.985231	1.02565	0.999546	1.00841	0.993314	1.02493	1.02047	1.00609	0.994771	1.02288	1.01124	1.02163	0.982435	0.973022	1.01505	0.977915	0.992721	0.992968	1.01068	1.00627	1.00421	1.00174	0.999479	1.03173	1.0006	1.03356	1.00764	0.977927	1.00448	0.984766	1.01412	1.01295	1.00388	0.989965	0.972164	1.01495	0.989974	0.998619
1094	1.0048	1.0037	0.997686	0.99332	0.995569	0.982727	0.992358	1.00093	1.00068	1.02292	0.988726	0.997185	1.01846	0.999206	1.00535	1.00399	1.0206	1.01267	1.0233	0.990035	1.01852	1.00806	1.01138	0.993206	0.985117	1.01603	0.986686	1.00139	0.997001	1.01614	1.0052	1.00994	1.00419	1.00111	1.01047	0.984617	1.02365	1.0151	0.975505	0.993008	0.982238	1.01846	1.00959	0.991626	0.983199	0.983753	0.989946	0.989672	1.01584
1096	0.990757	1.00549	0.992691	0.99443	0.994065	0.99174	0.997967	1.00001	1.00994	1.01419	0.986336	0.994157	1.0264	1.01843	1.00179	1.01533	1.02433	1.00213	1.01983	0.998268	1.03241	1.01744	1.00102	1.00543	1.00354	1.01273	0.996712	1.00294	0.990809	1.01998	0.99852	1.00444	1.00541	1.00241	1.00531	0.997267	1.01083	1.01666	0.984385	0.997525	0.996179	1.0216	1.00891	0.992181	0.984761	0.986469	0.985945	1.00397	1.01329
1098	1.00404	1.00456	1.00903	0.992563	0.993205	0.993556	0.987057	1.00118	1.00369	1.0154	0.981837	1.00467	1.029	1.02642	0.999829	1.01944	1.01991	0.996846	1.02224	1.00838	1.02689	1.0117	1.00513	0.995519	1.00022	1.01411	0.992884	1.00233	0.997619	1.02336	1.0119	0.992214	1.0048	1.00686	0.997273	0.997928	0.999509	1.02071	0.974091	1.01393	1.00209	1.02055	1.00291	0.989534	0.989834	0.987659	0.971451	1.00634	1.01472
1100	0.994962	1.00677	1.00235	0.982948	0.994582	0.99818	0.990656	1.0154	1.00594	1.00903	0.994205	1.0051	1.02157	1.03632	1.00043	1.03155	1.03449	1.00513	1.0276	1.01699	1.01837	1.01463	1.017	0.997105	1.00179	1.00007	1.00388	1.01065	0.988197	1.00639	1.01666	0.990828	1.01667	1.01483	0.999913	0.989195	1.00637	1.02114	0.972477	1.00533	1.01649	1.01935	1.00201	0.98914	0.985851	0.993164	0.983989	1.01501	0.99823
[truncated: 206 more columns]
