# Supplementary material for: Membrane-mediated dimerization potentiates PIP5K lipid kinase activity
Source: eLife. 2022 Aug 17;11:e73747. doi: 10.7554/eLife.73747 (PMC9470164; doi:10.7554/eLife.73747)
Supplement: Figure 7—source data 2. [file elife-73747-fig7-data2.xlsx]

## Sheet: Figure 7C
Figure 7C
	Normalized PIP2 density (0-1) measured in the presence of PIP5KB (D51R)
time (sec)	mean	corral 1	corral 2	corral 3	corral 4	corral 5	corral 6	corral 7	corral 8	corral 9	corral 10	corral 11	corral 12	corral 13	corral 14	corral 15	corral 16	corral 17	corral 18	corral 19	corral 20	corral 21	corral 22	corral 23	corral 24	corral 25	corral 26	corral 27	corral 28	corral 29	corral 30	corral 31	corral 32	corral 33	corral 34	corral 35	corral 36	corral 37	corral 38	corral 39	corral 40	corral 41	corral 42	corral 43	corral 44	corral 45	corral 46	corral 47	corral 48
0	0.0206949	0.0146711	0.017101	0.0130526	0.00830585	-0.0153297	0.0114419	0.00519185	0.0124878	0.0189254	0.00919606	0.0141465	0.014563	0.00861066	0.0108757	-0.0148876	0.00951139	0.00131292	0.0226307	0.0122994	0.0120077	0.00743057	0.0246525	0.0135851	0.0125994	0.0162592	-0.00975488	0.0202499	0.01446	0.0195719	0.0252436	0.0290412	0.0317656	0.0244241	0.0545311	0.00292386	0.010787	0.0159927	0.00810718	0.0103098	0.0114445	0.0108569	0.00261284	0.00230154	0.0068255	0.0117958	0.0107802	0.0120423	0.0253979
2	0.00539159	0.00735988	0.00965869	0.0133517	0.000715654	0.0142738	0.00461617	0.0158482	0.00117092	0.000248831	0.01179	0.0121052	0.00680858	0.00617835	0.00774878	0.0112587	0.0133687	0.0208993	0.00887986	-0.000578572	0.0217046	0.0129884	-0.00144747	0.00394118	0.0044654	0.0105486	0.00945936	0.00376346	0.00738304	0.0182898	0.0116531	0.00665281	-0.000768654	0.00402604	-0.00682756	0.0156908	0.00359138	0.00928982	0.0107737	0.00367822	0.00416686	0.00250904	0.00562095	0.00384548	0.0107124	0.00203499	0.0113013	0.0110669	0.00509979
4	-0.00326551	0.0021167	0.000301448	0.00148562	-0.000732737	-0.006146	0.00217885	0.00153702	0.000877581	0.00274545	0.000290217	0.00081625	0.00169428	0.000353567	-0.000376895	-0.00323051	-0.00151802	-0.00305989	0.0037171	0.000289949	0.00149267	-0.000119532	0.00378998	0.00195608	0.00217784	0.00230015	-0.00130517	0.00359652	0.00129347	0.00318687	0.00442745	0.00369107	0.00549624	0.00244845	0.0067436	-0.000761162	0.000583944	0.00286215	0.00109515	0.00114873	0.0017183	0.000806844	-0.0012396	-0.0013887	-0.000672041	0.000981627	-0.000241219	0.000877331	0.00112909
6	-0.00439931	-6.07153e-18	-1.21431e-17	5.72459e-18	1.17961e-17	-1.76942e-17	-2.32887e-17	-5.81132e-18	-5.89806e-18	1.73472e-19	1.23165e-17	-5.55112e-18	-5.55112e-18	1.11022e-17	4.19803e-17	3.11817e-17	-2.498e-17	-6.93889e-18	-1.23165e-17	1.83881e-17	-5.89806e-18	-3.01842e-17	-6.07153e-18	1.68268e-17	1.67834e-17	-5.55112e-18	4.58834e-17	-5.37764e-18	-3.46945e-19	-2.22912e-17	-1.18829e-17	2.22045e-17	1.17961e-17	1.17961e-17	2.91433e-17	1.16227e-17	-2.87964e-17	-3.07046e-17	-1.72605e-17	1.12757e-17	-1.14492e-17	5.55112e-18	-5.55112e-18	-2.74086e-17	0	-1.11022e-17	-3.46945e-19	1.17961e-17	-5.55112e-18
8	-0.00548138	-0.000265353	-0.00285826	-0.00656132	0.00415253	-0.00237603	-0.000927211	-0.00362988	0.00169429	0.0011335	-0.00433094	-0.000899021	-0.00294657	-0.000573995	-0.00348742	-0.00212426	0.00232115	-0.00476674	-0.000756154	0.000406672	-0.00410524	-0.00101271	-0.00090571	0.000870608	-0.000627793	-0.0021434	-0.0034597	-0.000559685	-0.000822405	-0.00361232	-0.00215159	-0.00106164	-0.000107881	0.000706453	0.00224726	-0.00328111	-0.000428225	-0.00135986	-0.00183786	0.000944158	0.00103834	8.53854e-05	-0.000183017	-0.000257605	-0.0014449	-0.000520149	-0.0031713	-0.00244868	-0.0016073
10	0.00775461	0.00466483	0.00149543	-0.00212966	0.00998736	0.00162984	0.00193345	0.000401907	0.00604431	0.00791115	-0.00125495	0.004027	0.00146737	0.00414105	0.000553657	0.00509307	0.00848288	0.00351034	0.00528522	0.00504002	0.00129626	0.00372536	0.00419115	0.00431483	0.0025097	0.00228257	0.000858215	0.00285343	0.00359518	0.0010863	0.00268297	0.00363947	0.00446644	0.00666914	0.00974063	-0.000866587	0.00279863	0.00147284	-0.00229852	0.00336875	0.00547848	0.00434914	0.00220235	0.00325495	0.00182706	0.00228693	-0.000121809	0.00292121	0.00446933
12	0.00269908	0.0115888	0.00537534	7.89636e-05	0.010538	0.00513782	0.00774991	0.00212704	0.011587	0.0122987	0.003308	0.00855776	0.00431583	0.00985722	0.00829438	0.0101174	0.0150541	0.00832569	0.010099	0.0108366	0.00542887	0.00875098	0.0075724	0.0074973	0.00411485	0.00551015	0.000643471	0.00663457	0.00832541	0.00435608	0.00632093	0.00795715	0.00991496	0.0145844	0.019788	-0.000996009	0.00755866	0.00565041	0.00221535	0.002242	0.0105463	0.00878198	0.00483066	0.00648624	0.00427361	0.00530675	0.00285812	0.00530582	0.0106817
14	0.0201049	0.0181603	0.0090558	0.00318032	0.0166514	0.00914369	0.0169392	0.00627932	0.0160624	0.0183748	0.0108034	0.0150159	0.0118049	0.0163975	0.0147263	0.0119832	0.0261819	0.0213212	0.0120109	0.0153856	0.00961917	0.0127027	0.013495	0.0129229	0.00903658	0.0113946	0.00285168	0.0134833	0.0157224	0.0112612	0.0135365	0.0196123	0.0232111	0.0247717	0.0352312	0.00334556	0.0129628	0.0125988	0.00957857	0.00756401	0.0144399	0.0123377	0.00879636	0.0119425	0.00968539	0.011837	0.00970555	0.0147394	0.021544
16	0.0194658	0.0254901	0.0117377	0.00516359	0.017659	0.0077327	0.0231964	0.0110042	0.0191342	0.0227399	0.0142531	0.0194897	0.0150156	0.021853	0.017648	0.0142267	0.0318109	0.0248937	0.0171916	0.0189271	0.0117888	0.0152929	0.0182605	0.0171663	0.0134641	0.0170275	0.00599889	0.0190533	0.020116	0.0161885	0.0214348	0.0262745	0.034667	0.0328036	0.0445002	0.00281843	0.0174673	0.0174072	0.0128846	0.00933093	0.0182694	0.0147088	0.0100138	0.0136881	0.0116414	0.0159252	0.0143458	0.019176	0.0255331
18	0.0354877	0.0243254	0.00862174	0.00507754	0.0114694	0.00543909	0.0239859	0.00991644	0.018381	0.022615	0.0152949	0.019551	0.0163572	0.0218704	0.0197726	0.0125247	0.0266089	0.0256898	0.0128519	0.0202553	0.00935829	0.0128416	0.0224095	0.0169425	0.0135817	0.0181744	0.0049191	0.0210119	0.0236828	0.0182883	0.0225398	0.0282217	0.03956	0.0317657	0.053224	-0.000555975	0.0168689	0.01823	0.0117188	0.00699402	0.0169828	0.014664	0.00816157	0.0137424	0.0103786	0.0158724	0.0151427	0.0191773	0.0290811
20	0.0368306	0.022341	0.00659455	0.00251083	0.00689399	0.00345114	0.0235226	0.0102842	0.0179909	0.0208589	0.0157082	0.0212345	0.0140003	0.0219633	0.0192993	0.00610067	0.0253109	0.0226655	0.00665637	0.0177466	0.00723334	0.00964257	0.0199878	0.0173692	0.012718	0.0167791	0.00166274	0.0210539	0.0248541	0.0201587	0.0243101	0.0308702	0.0407771	0.0342388	0.0543511	-0.00015989	0.0174766	0.0161354	0.0130915	0.0071279	0.0144852	0.0125138	0.00700328	0.0135188	0.0113578	0.0166768	0.0165498	0.0187848	0.0315027
22	0.00447893	0.019202	0.00431208	0.00112412	0.00699176	0.000999659	0.0219146	0.00940127	0.0157322	0.01954	0.0159045	0.0203492	0.0137394	0.0207406	0.0166296	0.00133314	0.0222084	0.026537	0.00385636	0.017437	0.0062115	0.00830519	0.018222	0.0185939	0.013547	0.01944	0.000843527	0.0206592	0.0250825	0.0207995	0.0285587	0.0324769	0.0430872	0.0347345	0.0572093	0.000202491	0.015591	0.0166897	0.0126564	0.00834281	0.0140357	0.0107401	0.00834754	0.0125908	0.0112522	0.0167779	0.0191952	0.0172404	0.0301836
24	0.0205009	0.0151028	0.00155985	-0.00309348	0.00300769	-0.0028238	0.018029	0.00584299	0.0128767	0.0162246	0.0117028	0.0202598	0.00942107	0.0172169	0.013796	-0.00144549	0.0161804	0.0197545	0.0026315	0.0153647	0.00495831	0.00739135	0.0148373	0.0159905	0.0121273	0.0189914	-0.00246499	0.0188808	0.0227289	0.0185465	0.0253689	0.0295935	0.0365775	0.0331426	0.0507248	-0.00656547	0.0138898	0.0111769	0.00892303	0.00544165	0.0140622	0.00814615	0.005505	0.0108068	0.00934572	0.0141145	0.0161772	0.0126364	0.0299476
26	0.0206296	0.00915587	-0.00701464	-0.0102023	-0.00135168	-0.00498615	0.0145975	0.00210384	0.00884914	0.0122244	0.00620114	0.0170455	0.00475154	0.0114252	0.0109976	-0.00481466	0.00878235	0.0169761	-0.00266185	0.00825068	0.000898851	0.00551356	0.00984852	0.0127187	0.00847594	0.0165031	-0.00714023	0.014789	0.0201483	0.014583	0.0214055	0.0251733	0.0300727	0.0299068	0.0467956	-0.0118227	0.00937242	0.00639473	0.00514486	0.00203668	0.0125604	0.00666894	0.00209769	0.00870328	0.00590154	0.0104197	0.0105731	0.00766638	0.0253878
28	0.019057	0.0105478	-0.00223791	-0.00853305	0.000407894	-0.00493758	0.0172428	0.00387986	0.00934196	0.014428	0.00740054	0.0179598	0.00381421	0.0120725	0.0137453	-0.00405067	0.013165	0.01944	0.00415383	0.00756388	0.001996	0.00675658	0.00855569	0.012677	0.00974481	0.0199516	-0.00604043	0.0149911	0.0200435	0.0149938	0.0248202	0.0277116	0.0318136	0.0354436	0.0468291	-0.0100547	0.0121028	0.00666328	0.00836293	0.00442406	0.0150693	0.00749689	0.00428505	0.0100867	0.00715662	0.0137977	0.0126362	0.0102458	0.0274327
30	0.0109064	0.0117495	-0.0012278	-0.00832003	-0.000734052	-0.0060039	0.0168529	0.000854706	0.00680113	0.0145506	0.00804769	0.0161602	0.00406125	0.0108189	0.0144689	-0.00506896	0.0137951	0.017994	0.0085813	0.00883827	0.00281196	0.00966828	0.00990449	0.0122456	0.0106272	0.0200698	-0.006496	0.015189	0.0225509	0.0146636	0.0256797	0.02615	0.0311502	0.035211	0.0467233	-0.0108639	0.0100193	0.00897335	0.00832911	0.00443555	0.0173537	0.00606356	0.00405659	0.0100077	0.00667264	0.0147954	0.0116726	0.010887	0.0274397
32	0.018471	0.00890223	-7.54292e-05	-0.00923507	-0.000423926	-0.00648551	0.0179304	0.000806557	0.00657575	0.0134207	0.00830548	0.0169467	0.00420439	0.0113742	0.0163741	-0.00508211	0.017606	0.0178654	0.008723	0.00872553	0.00404808	0.0108421	0.0119692	0.0115543	0.0120904	0.0202924	-0.00503483	0.0168153	0.0240704	0.0134474	0.0263489	0.0271628	0.0303224	0.0371309	0.0454226	-0.00906358	0.012147	0.00740278	0.00777477	0.00500654	0.0182548	0.00780965	0.00478792	0.0102851	0.0079868	0.0148686	0.0113426	0.0124087	0.0313556
34	0.0221435	0.00553249	-0.00082301	-0.00933239	-0.00279429	-0.00501948	0.0194216	0.00305584	0.00723088	0.0146252	0.00760173	0.0145318	0.00413798	0.0136915	0.0156501	-0.00371526	0.0182612	0.0172202	0.00729603	0.00586238	0.00272527	0.0117024	0.0120025	0.0120712	0.0115623	0.018837	-0.00324698	0.0163813	0.0224632	0.0143909	0.025929	0.0251247	0.0330685	0.0338731	0.0459789	-0.00955727	0.00940908	0.00660839	0.00604287	0.00500329	0.0170623	0.00811137	0.00600983	0.0102839	0.00606597	0.0145048	0.0119626	0.0113961	0.0264065
36	0.0232858	0.00436382	-0.00107453	-0.00837329	-0.00202239	-0.00700614	0.0168589	0.000812295	0.00679991	0.0125028	0.00593404	0.0100321	0.00193377	0.0126463	0.0113888	-0.00667366	0.0154517	0.0119943	0.00546701	0.00737845	0.00218265	0.0075623	0.0126406	0.0103565	0.00980828	0.0147036	-0.0051655	0.0139553	0.0202693	0.0146191	0.019483	0.0209492	0.0303564	0.0283984	0.0406676	-0.0107452	0.00829579	0.0040196	0.00464362	0.00501053	0.0151684	0.00439087	0.00620833	0.0102045	0.0022683	0.0115562	0.00746741	0.00864622	0.024368
38	0.0117346	0.00158919	-0.0032193	-0.00851233	-0.00512128	-0.00495541	0.0134514	0.000545355	0.00807594	0.01094	0.00501927	0.00921356	0.00188824	0.0117962	0.0110492	-0.00736366	0.0142863	0.00977765	-0.000430772	0.00662585	0.00348569	0.00734974	0.0121546	0.0109306	0.00918221	0.0116102	-0.00598269	0.0145458	0.0171579	0.0126883	0.0160928	0.0187496	0.0271505	0.0248168	0.0382228	-0.0142911	0.00541197	0.00192265	0.0025718	0.00356532	0.0129047	0.00367517	0.00507117	0.00883534	0.00195654	0.00888074	0.00482199	0.00844721	0.022204
40	-0.00159121	0.00130121	-0.00425088	-0.0100546	-0.0040085	-0.0023334	0.0128005	0.00161162	0.00995455	0.0116135	0.00276716	0.00839935	0.00138159	0.011333	0.00850606	-0.0082822	0.0131068	0.010641	-0.00409179	0.0069426	0.00173269	0.00459521	0.0112559	0.0123962	0.0105232	0.0111459	-0.00542177	0.0138737	0.0142076	0.0110773	0.0116757	0.0190953	0.0274913	0.0228947	0.0366563	-0.0147193	0.00627246	-0.000361183	0.0013479	0.00276179	0.0103483	0.00570595	0.00682248	0.00745823	0.000262229	0.0061528	0.00457064	0.00709683	0.0206401
42	0.00518702	-0.000423181	-0.00913498	-0.0123191	-0.00425845	-0.00142598	0.00957615	-0.000278665	0.00861691	0.0107818	-0.00193239	0.00456896	-0.0031853	0.00668222	0.00535578	-0.0113349	0.00577459	0.00731515	-0.00844123	0.00180469	-0.00128489	0.00223506	0.00858719	0.0097062	0.00676108	0.00761484	-0.00971816	0.00949406	0.00861677	0.00756621	0.00458683	0.0120097	0.0227518	0.0162861	0.0302349	-0.0208819	0.000340507	-0.00255934	-0.00171287	-3.09724e-05	0.00632036	0.00241478	0.00348248	0.00580034	-0.00522673	0.00316502	-0.000355299	0.00289794	0.0106323
44	0.0151221	0.00230035	-0.00805374	-0.0113081	-0.00144182	-0.00246181	0.0069712	-0.00324145	0.00687911	0.0078566	-0.00181226	0.00471948	-0.00546095	0.00273757	0.00229173	-0.0150814	0.00576667	0.00654622	-0.00927027	0.00342952	-0.000902915	0.00196949	0.00862598	0.00769331	0.00630007	0.00690567	-0.0114665	0.00967408	0.0111361	0.00702169	0.0042811	0.0133789	0.0204684	0.0163927	0.0324706	-0.0192922	0.00353147	-0.00136254	-0.000738701	-0.000257021	0.00550926	0.00119851	0.00258852	0.00640294	-0.00557419	0.00250781	-0.00234956	0.00120473	0.0113165
46	-4.29553e-05	0.00554553	-0.00483498	-0.00967606	-0.000913557	0.00050616	0.010567	0.000578286	0.0108495	0.0116797	0.000791985	0.00840878	-0.00395912	0.00595449	0.00774985	-0.0124712	0.0106318	0.0104892	-0.00837106	0.00597752	-0.000395245	0.0061963	0.00831384	0.011043	0.00815811	0.00950625	-0.00620883	0.0144639	0.0137187	0.00737909	0.0109445	0.0194123	0.0219917	0.0225391	0.0373991	-0.017617	0.00553103	0.00272561	0.0015806	0.00113549	0.00732992	0.00565295	0.00675468	0.00656663	-0.00193642	0.00422923	0.00122102	0.00630318	0.0141966
48	0.0143254	0.0100438	-0.00338572	-0.00815974	0.00268075	-0.00175722	0.0132737	0.000749926	0.00966512	0.0127296	0.00171659	0.00881677	-0.00305248	0.00442744	0.00792205	-0.0124504	0.0100591	0.0100345	-0.00492028	0.00893298	0.000641766	0.0076972	0.00945828	0.0109117	0.0106801	0.0115846	-0.00445213	0.0140023	0.0171403	0.0101103	0.0133422	0.0225938	0.0257694	0.026065	0.0378357	-0.0138916	0.00824624	0.00383995	0.00315219	0.000574987	0.00896713	0.00634274	0.00791321	0.00655866	-0.00164981	0.00716031	0.00123835	0.00695275	0.0156848
50	0.014498	0.00791827	-0.00665334	-0.00900421	0.00205419	-0.00487402	0.011981	-0.000294382	0.00765647	0.00960855	-0.000640232	0.0076101	-0.0064023	0.00281652	0.00411952	-0.0145763	0.00624063	0.00477776	-0.00211783	0.00651842	0.00110501	0.00876159	0.00790641	0.0082843	0.00844913	0.0112606	-0.003816	0.0114379	0.0190644	0.00826417	0.0132938	0.018501	0.0219699	0.0254273	0.0350084	-0.0165452	0.00885749	0.00341558	0.00535051	-0.00156361	0.00991512	0.00368165	0.00646357	0.00687808	-0.00231229	0.00913219	-0.0016299	0.0053338	0.0130572
52	0.0171473	0.0149481	0.000846632	-0.00423623	0.00424793	-0.00500992	0.01459	0.00358997	0.0109869	0.0136761	0.00541447	0.0124343	-0.000178611	0.00888258	0.0069426	-0.00865214	0.00924415	0.00641114	0.0035093	0.0136881	0.00156364	0.0111382	0.0110479	0.0123044	0.0115291	0.0163134	0.00198613	0.0187952	0.0252901	0.0159509	0.0192486	0.0292853	0.0331732	0.0327549	0.0454228	-0.00951305	0.0139876	0.00887214	0.00964094	0.00255747	0.0141626	0.00798186	0.0117094	0.0125541	0.00269269	0.0145526	0.00510186	0.0133903	0.024929
54	0.0100202	0.0159505	0.00153006	-0.00584619	0.00306656	-0.00536932	0.0168546	0.00504017	0.0149893	0.0141428	0.0063	0.0132882	-0.000505644	0.00910914	0.00912607	-0.00647855	0.00996979	0.00671577	0.00550304	0.0134735	-0.000143849	0.0101543	0.0108165	0.0136067	0.0116215	0.0181027	0.00313759	0.0200682	0.0273081	0.015591	0.0214976	0.0299376	0.0330096	0.0355647	0.0449396	-0.00956509	0.0148398	0.0103926	0.0120554	0.0042657	0.0148663	0.00992893	0.0146197	0.0130811	0.00446217	0.0164355	0.0061331	0.0164303	0.0252792
56	0.0294514	0.0127125	0.00373871	-0.00362944	0.00408919	-0.00499726	0.0180192	0.00522503	0.0162159	0.014628	0.0104165	0.0160698	0.00422929	0.00987168	0.00967919	-0.00667996	0.0108052	0.00942724	0.00743204	0.015049	0.00282713	0.0110088	0.0134302	0.0138913	0.0128811	0.0219361	0.00367698	0.0220201	0.0298984	0.0196627	0.0232662	0.030826	0.0377968	0.0382691	0.0464562	-0.00524752	0.0167296	0.0124703	0.0137583	0.00633111	0.0164399	0.0102746	0.0158134	0.0169259	0.00583114	0.0199025	0.00876626	0.0184888	0.0301342
58	0.0189957	0.014732	0.00682111	-0.0028217	0.0054201	-0.00463734	0.0209471	0.00717918	0.0179039	0.0160828	0.0132339	0.0187032	0.00780981	0.0118374	0.00881741	-0.00598064	0.0103123	0.0162374	0.00873925	0.0146526	0.00221029	0.0117072	0.0152125	0.0151529	0.0126769	0.0241643	0.00494721	0.0237542	0.0315597	0.0204961	0.02526	0.0297349	0.0376153	0.0400307	0.0500518	-0.00360089	0.0188566	0.0128243	0.0155841	0.00816522	0.0174175	0.0113565	0.0178819	0.0198385	0.00835262	0.019936	0.0120559	0.0194276	0.0318904
60	0.0289316	0.0171489	0.0108312	0.00337838	0.00806195	-0.00122419	0.0238103	0.0102847	0.0224602	0.018788	0.0197959	0.0226609	0.0136891	0.0171706	0.0144125	-6.96029e-05	0.0156058	0.0235687	0.00913724	0.0200195	0.00363875	0.0129184	0.0187932	0.0178481	0.0147765	0.0263317	0.00427993	0.0298652	0.0350863	0.0245811	0.0317675	0.0333398	0.0439959	0.0431546	0.0550277	0.00158137	0.0192143	0.0165312	0.0182313	0.0107327	0.0202081	0.0163681	0.0221991	0.0211741	0.0112567	0.021671	0.0154223	0.0248788	0.0380733
62	0.022957	0.0146346	0.00858899	0.0014885	0.00789611	0.00268815	0.027396	0.0109602	0.0214115	0.0161301	0.0174532	0.023073	0.0163456	0.0163918	0.0158261	-0.000224976	0.0203284	0.0245371	0.00777936	0.0199086	0.00629331	0.0128257	0.0195138	0.0186671	0.0161278	0.0259581	0.000461395	0.0284296	0.0347195	0.0232822	0.032992	0.0304971	0.0396658	0.0426497	0.0549347	8.30457e-05	0.0201253	0.0156133	0.0170069	0.0121969	0.0207605	0.0180257	0.0201901	0.018937	0.0128548	0.0211355	0.0148775	0.0227047	0.0361493
64	0.0294895	0.013867	0.0102876	0.00357409	0.0101238	0.00626615	0.0294372	0.0133879	0.0209554	0.0200459	0.0186603	0.0251759	0.0210967	0.0203816	0.0197114	-3.56235e-06	0.020946	0.0281568	0.0106284	0.0235201	0.00805363	0.016542	0.0217691	0.0209918	0.0171534	0.0281335	0.000681203	0.0306315	0.0342974	0.0268998	0.036117	0.0324972	0.0406207	0.0421885	0.0555573	0.00133763	0.0215569	0.0160216	0.0180399	0.0148058	0.0236815	0.0198358	0.0206728	0.0195336	0.0156707	0.0229608	0.0191536	0.0241231	0.0409338
66	0.0315024	0.0172184	0.0106092	0.00532362	0.0108849	0.00708365	0.0309017	0.0161875	0.0220009	0.021595	0.0171093	0.0240013	0.0222128	0.0234085	0.0211212	0.00491742	0.0218182	0.0279627	0.0137359	0.0225988	0.0078296	0.0173077	0.0220336	0.0229112	0.0209425	0.0271529	0.00050014	0.029437	0.0346128	0.0258877	0.0391238	0.0329811	0.0417065	0.0415362	0.0569984	0.00293788	0.0225845	0.0161847	0.0208687	0.0160927	0.0226765	0.0215075	0.0185144	0.0186712	0.0189527	0.0242587	0.0205202	0.0245007	0.0405566
68	0.0293749	0.0156649	0.00996497	0.00688032	0.0118058	0.00843445	0.0324166	0.0170253	0.0232957	0.0240241	0.0185226	0.0241394	0.0230745	0.0273929	0.0261094	0.00673066	0.0242745	0.0289373	0.0145289	0.0218205	0.0111947	0.0174384	0.0240137	0.0253171	0.0214584	0.0273496	0.00195878	0.0315665	0.0356457	0.0279116	0.0405979	0.0350612	0.0470689	0.0414863	0.0581358	0.00134949	0.022607	0.0211566	0.0215323	0.0183891	0.0241515	0.0227063	0.0190524	0.0190729	0.0214681	0.0251863	0.0208688	0.0256855	0.0407888
70	0.0318058	0.0167484	0.0137466	0.00720982	0.013091	0.00809365	0.034592	0.0164732	0.0219979	0.0262841	0.0189885	0.0268048	0.0230219	0.0265997	0.0283243	0.00593927	0.0270741	0.0301869	0.0189781	0.0224677	0.0116439	0.0202048	0.0247512	0.0263527	0.0218756	0.0321695	0.00475424	0.031071	0.0354192	0.0297084	0.0409614	0.0392332	0.0476758	0.0422957	0.0607763	0.00220583	0.0251424	0.0220731	0.0205271	0.0191847	0.0251656	0.0213809	0.0196101	0.0198788	0.0231086	0.0243691	0.0232008	0.0266661	0.0435314
72	0.0311684	0.0194985	0.014334	0.0121785	0.015537	0.0061783	0.0344787	0.0167733	0.0243537	0.0311778	0.0211112	0.0274161	0.0215311	0.0254637	0.0296587	0.00406163	0.0294524	0.0329959	0.0192558	0.0226526	0.0106172	0.020692	0.0241097	0.0250898	0.0224463	0.0337047	0.00776243	0.0298945	0.0361922	0.0310252	0.0411932	0.0413412	0.0473601	0.0432169	0.062338	0.00340406	0.0269883	0.0239468	0.0212948	0.0165992	0.0259754	0.0202807	0.0215272	0.0213831	0.0218025	0.0243965	0.0249058	0.0273824	0.042135
74	0.0346185	0.0201085	0.0136476	0.0149543	0.0133635	0.00679117	0.0342829	0.0173394	0.0252856	0.0309371	0.020695	0.0292332	0.0229668	0.0266254	0.0315676	0.00712443	0.0298913	0.0338507	0.0171607	0.0216313	0.0146707	0.0199793	0.0249199	0.0282425	0.0248175	0.0347523	0.00929703	0.0295337	0.0372406	0.0308843	0.0423115	0.0445113	0.0519059	0.0484482	0.0637649	0.0054217	0.025575	0.0252678	0.0222144	0.0162965	0.0260678	0.0217558	0.0218596	0.0217873	0.021	0.0247477	0.0244245	0.02954	0.0417472
76	0.0318076	0.0185582	0.0145903	0.0144705	0.0144808	0.0075371	0.0345744	0.0154623	0.0238416	0.032496	0.0222056	0.030896	0.0246669	0.024593	0.0310959	0.00643526	0.0304167	0.0344891	0.014565	0.0214928	0.0159927	0.0217036	0.026774	0.0285388	0.0226574	0.0360165	0.0104163	0.0320932	0.0379413	0.0318902	0.0402943	0.0439948	0.0508717	0.0468306	0.0633275	0.00409485	0.0242516	0.0250716	0.0226224	0.0167101	0.0273023	0.0203874	0.0226914	0.0219172	0.0213079	0.0262781	0.0257748	0.0308104	0.0441401
78	0.0332696	0.0193846	0.0169466	0.0156099	0.0174638	0.010333	0.0346622	0.0186653	0.0246048	0.0314602	0.0225224	0.0310684	0.026143	0.0265546	0.0324492	0.0103081	0.0323134	0.0320088	0.0159494	0.0264238	0.0145179	0.0244441	0.0257777	0.0299634	0.0237755	0.0372268	0.0104105	0.0344756	0.0381803	0.0306534	0.0402012	0.0454942	0.0476244	0.0499534	0.0633069	0.00751294	0.0270341	0.0253937	0.0238784	0.0158354	0.0290216	0.0213965	0.0232908	0.0217977	0.0202321	0.0274902	0.027173	0.0320057	0.0481323
80	0.0332536	0.0179516	0.0171874	0.0165711	0.0187694	0.0104692	0.0353566	0.0209276	0.0264391	0.0306446	0.0214987	0.0284788	0.0274175	0.0271786	0.0346453	0.0121016	0.028231	0.0308671	0.0161743	0.0253609	0.0151014	0.0242474	0.0255333	0.0326095	0.0260755	0.0355517	0.0108337	0.0333638	0.0374524	0.0297743	0.0413555	0.0431529	0.0463827	0.0491404	0.0658702	0.00715083	0.0264026	0.0262566	0.0245249	0.0155129	0.0275435	0.0237937	0.0222082	0.0239763	0.0206769	0.0291039	0.0261277	0.0322593	0.0456246
82	0.0356771	0.0184765	0.0221238	0.0173935	0.0192578	0.0104764	0.035003	0.0208033	0.0284153	0.0298563	0.0220698	0.0287552	0.0291626	0.0311887	0.0360207	0.0149671	0.0258369	0.0293471	0.0206432	0.02394	0.0161197	0.0275606	0.0279419	0.0359669	0.0266586	0.0362224	0.0103373	0.0366352	0.0385103	0.0288286	0.0448668	0.0418947	0.0482735	0.0480751	0.0609332	0.0079004	0.0273951	0.026471	0.0267162	0.0184633	0.0277608	0.0233855	0.0224885	0.0242982	0.0227383	0.0288737	0.0259144	0.0334625	0.0493425
84	0.0357532	0.0234304	0.0245513	0.0186858	0.0237648	0.010995	0.034816	0.0215545	0.0297669	0.0313527	0.0277336	0.03038	0.0295004	0.0339317	0.0353806	0.0186486	0.0290327	0.032659	0.0231262	0.0251566	0.0159407	0.0292619	0.0305908	0.0348863	0.0267858	0.0377479	0.01172	0.039878	0.0394622	0.031287	0.0470088	0.0406477	0.0485728	0.0475851	0.0669723	0.00717833	0.0304217	0.0296877	0.0271168	0.0191192	0.0283131	0.0230389	0.0236925	0.0270606	0.0252529	0.0296729	0.026073	0.0355169	0.0532734
86	0.0374941	0.0247199	0.0216806	0.0169454	0.0233188	0.0122189	0.0336517	0.0214587	0.0307403	0.0311269	0.0294794	0.0314892	0.0297817	0.0343965	0.0363248	0.0173448	0.0312385	0.0341262	0.0260368	0.0277675	0.0136732	0.0302569	0.0312692	0.0349437	0.0279796	0.0368648	0.0118043	0.0400299	0.0406974	0.0306928	0.0459322	0.0419495	0.0479289	0.0520887	0.0689224	0.00826332	0.0327972	0.0306296	0.0260459	0.0193745	0.030821	0.0251882	0.0257688	0.0291255	0.0243076	0.0299675	0.0255759	0.0358233	0.0497641
88	0.0411	0.0247185	0.0200832	0.019966	0.0229275	0.0111086	0.0332663	0.0194569	0.0313296	0.0326456	0.0294717	0.030977	0.0297427	0.0353199	0.0335243	0.0144755	0.0300847	0.0366026	0.0264722	0.0270014	0.0150903	0.0324704	0.0347062	0.0354136	0.0286145	0.0366832	0.0120375	0.0391159	0.0409601	0.0327775	0.0490856	0.0428053	0.0489159	0.0540023	0.0702246	0.00774455	0.0307192	0.0302714	0.0260918	0.020196	0.0305587	0.0266731	0.0260049	0.0302146	0.0244829	0.0311471	0.0267349	0.0372412	0.0479601
90	0.0365337	0.0274753	0.0190304	0.0183655	0.0224536	0.0131767	0.0327937	0.0189076	0.0315543	0.0345703	0.0277567	0.0302583	0.0292546	0.0385199	0.0319654	0.0159363	0.0350273	0.0355864	0.0251305	0.0286707	0.0162985	0.0336894	0.0363495	0.0334625	0.0289301	0.0362141	0.0122265	0.0419769	0.0410764	0.035903	0.0470974	0.0441652	0.0492377	0.0558978	0.0676724	0.007397	0.0319387	0.0316521	0.027363	0.0225611	0.0332505	0.0269005	0.0275233	0.0308346	0.0250963	0.0309821	0.0265741	0.038368	0.0492296
92	0.036956	0.0283986	0.0173428	0.0149118	0.0231162	0.0136797	0.032537	0.0202705	0.0312969	0.0336306	0.0279385	0.0294212	0.0258072	0.0364932	0.0322999	0.0157911	0.0335481	0.0385547	0.023797	0.0289952	0.0173632	0.0300769	0.0349486	0.0302559	0.0292691	0.035897	0.0125625	0.0404866	0.0425227	0.0373417	0.0447582	0.0441434	0.0502906	0.057957	0.0688552	0.00837467	0.0306977	0.0320023	0.0273189	0.0205637	0.0339067	0.0296417	0.029041	0.0312665	0.026019	0.0343247	0.0260357	0.0373235	0.0485531
94	0.0372972	0.0267716	0.0204708	0.0148939	0.0242142	0.0153194	0.0343028	0.0212841	0.0315826	0.0356822	0.0269857	0.029914	0.0265735	0.0358196	0.0318784	0.0135761	0.0345319	0.0362587	0.0255255	0.0296411	0.017727	0.0295232	0.0361506	0.0305705	0.031417	0.0362257	0.0139796	0.0397452	0.0457937	0.0385119	0.0420465	0.0451547	0.0527952	0.0593129	0.0693363	0.0110329	0.0311184	0.0327774	0.0276451	0.0204645	0.0340781	0.0306373	0.0309687	0.0310654	0.0268638	0.0345786	0.0289048	0.0385617	0.044029
96	0.0356089	0.0296945	0.0258078	0.0212556	0.0288217	0.015599	0.0373399	0.0243985	0.0328401	0.0364542	0.026393	0.0317734	0.0257197	0.0362399	0.032896	0.0139442	0.0324921	0.0386211	0.0257412	0.0313893	0.0201147	0.0296083	0.0370076	0.0313751	0.0347997	0.0392446	0.0158974	0.041753	0.0463323	0.0411807	0.0447353	0.0483179	0.0575531	0.0611445	0.0681365	0.013156	0.0334084	0.0360696	0.0289727	0.0204997	0.0353865	0.031767	0.0308822	0.0317808	0.0275856	0.0372037	0.0301695	0.0423242	0.0459265
98	0.0443812	0.0322176	0.0288996	0.0200051	0.0303834	0.0213584	0.0398973	0.0253036	0.0339587	0.0370012	0.026856	0.0343734	0.0256802	0.0373685	0.0331103	0.018778	0.0345008	0.0374009	0.0270235	0.0319933	0.0215751	0.0289765	0.0369613	0.0333	0.0360376	0.0419884	0.0157639	0.0443142	0.0487119	0.0434318	0.0455802	0.0504617	0.059335	0.0606263	0.0679045	0.0153457	0.036564	0.0376819	0.0308952	0.0217993	0.0357759	0.0300449	0.0322559	0.0325092	0.0295308	0.0376871	0.0316589	0.0418627	0.0476771
100	0.0430378	0.0322224	0.0291409	0.0182259	0.0311427	0.0224976	0.0399964	0.0274569	0.0369029	0.0379409	0.0316196	0.0397872	0.0283311	0.034398	0.0338859	0.0176559	0.0394015	0.0387867	0.0294461	0.0317867	0.0253163	0.0281109	0.0403756	0.0326229	0.0363028	0.0427766	0.0175059	0.0432726	0.0505683	0.0428338	0.0465069	0.0498212	0.0643463	0.0636868	0.071531	0.0187972	0.0374528	0.0399944	0.0322306	0.0229615	0.0365885	0.0314072	0.0339242	0.0321675	0.0289372	0.0385812	0.0356906	0.0431537	0.0472676
102	0.0433917	0.031709	0.0295178	0.0205618	0.0321272	0.0244734	0.0410653	0.0288983	0.0339675	0.039655	0.0350847	0.0433697	0.0320898	0.0407936	0.0339439	0.0212281	0.045699	0.038594	0.0311589	0.0323207	0.0279516	0.0323448	0.0431737	0.0350635	0.0366186	0.0429998	0.0206184	0.0455094	0.0500534	0.0455277	0.0493232	0.0526729	0.066631	0.0620069	0.0751176	0.021357	0.0376965	0.0402279	0.0342325	0.0264719	0.0365252	0.0303332	0.0332587	0.031408	0.032347	0.0377643	0.0367933	0.0449865	0.0484564
104	0.0432655	0.0333227	0.0292877	0.0214282	0.0334938	0.0242262	0.0405642	0.0290927	0.0336502	0.0383038	0.0343565	0.0441786	0.0321466	0.0432433	0.0357865	0.0205726	0.0427305	0.0423027	0.0320107	0.0345387	0.0288082	0.0318966	0.0435285	0.0384157	0.0353832	0.0432404	0.0181157	0.0456875	0.0487366	0.0463761	0.0519953	0.0539513	0.0646549	0.0603283	0.0733682	0.0218319	0.0363564	0.037966	0.0362525	0.0271263	0.0373235	0.0312148	0.0334916	0.0329507	0.0319319	0.0384484	0.0342119	0.0426202	0.0533716
106	0.0458937	0.034362	0.0314341	0.0215859	0.0336783	0.0272102	0.0412465	0.0294662	0.0333948	0.0412264	0.0348503	0.0454938	0.0341013	0.0474305	0.0366518	0.0245572	0.047652	0.0446556	0.0351244	0.0331736	0.0315611	0.0324196	0.0458111	0.038859	0.0357985	0.0414119	0.0187678	0.0437645	0.0499025	0.0472038	0.0531485	0.0542207	0.0638367	0.0590143	0.0781448	0.0194861	0.0370749	0.03539	0.0381875	0.0281552	0.036329	0.031689	0.0337382	0.0323042	0.0348546	0.0380076	0.0350962	0.0414375	0.0557332
108	0.0459828	0.0353138	0.0297489	0.0233184	0.0339433	0.0237143	0.042988	0.0331991	0.034771	0.0427357	0.0377073	0.0468212	0.0361784	0.0487636	0.039546	0.0206071	0.0493538	0.0464865	0.0359643	0.0368076	0.0315768	0.0339282	0.0447479	0.0386273	0.0372833	0.0410704	0.0207119	0.045524	0.0510528	0.0494251	0.0547991	0.0529329	0.0621547	0.0594407	0.0820217	0.0200715	0.0367687	0.0373992	0.0377454	0.0289609	0.0374134	0.0339529	0.035948	0.0354662	0.0364662	0.0388803	0.0360403	0.0450153	0.0570502
110	0.0484853	0.0373328	0.033985	0.0267721	0.0366453	0.0252661	0.04557	0.0335773	0.0363157	0.0425573	0.0354294	0.0471082	0.0370295	0.0508585	0.0439404	0.0221677	0.0477574	0.0496275	0.0354875	0.0358547	0.0295391	0.0372875	0.0445573	0.0428364	0.0387625	0.042588	0.0221059	0.0493395	0.0514049	0.0526464	0.0593417	0.0561948	0.0622698	0.058425	0.0793788	0.0200658	0.0390297	0.0362961	0.0385555	0.0290086	0.0379282	0.0354486	0.0355697	0.0369512	0.0393198	0.042617	0.0376329	0.0436722	0.0591999
112	0.0492509	0.0402623	0.0375337	0.0279513	0.0375749	0.0253553	0.0480048	0.0350487	0.0406789	0.0448861	0.0341412	0.0488843	0.038521	0.0507678	0.0457553	0.020794	0.0490255	0.0521787	0.0370122	0.0379494	0.0288827	0.0387958	0.0488586	0.0439532	0.0401126	0.045456	0.0243891	0.0514082	0.0543162	0.0532144	0.0576241	0.0582157	0.0622817	0.0620734	0.0816874	0.0234844	0.0422383	0.0383197	0.0399021	0.0301554	0.0395589	0.0389969	0.0390106	0.0401856	0.0384512	0.0446956	0.0407834	0.047823	0.0627833
114	0.0508652	0.0437563	0.0410472	0.0285796	0.0380995	0.0275732	0.0513558	0.0372473	0.0450629	0.0475318	0.0365294	0.0491915	0.0394825	0.0517598	0.0463264	0.0242574	0.0564301	0.0532415	0.0383853	0.0374064	0.0291899	0.0416905	0.0491689	0.043683	0.0422028	0.0462899	0.0268235	0.0536733	0.0543189	0.0538898	0.0594926	0.0590632	0.0676991	0.0643556	0.083198	0.0239622	0.0462542	0.0424699	0.0407217	0.0324111	0.0428626	0.0383203	0.0398653	0.0398182	0.0411753	0.0462442	0.0434939	0.0511271	0.0615519
116	0.0541889	0.0452332	0.0400875	0.0282983	0.0385189	0.0263322	0.0516445	0.0381716	0.0471349	0.0475461	0.0387074	0.0495136	0.0391484	0.0513177	0.0473502	0.0214714	0.0542571	0.0520538	0.0374972	0.0390882	0.03096	0.0426002	0.0483192	0.0474158	0.039044	0.0513262	0.0279663	0.058546	0.0573426	0.0544566	0.0585812	0.0586744	0.0693931	0.0648534	0.0795895	0.0250825	0.0463773	0.0441637	0.041371	0.0317282	0.0423811	0.0390588	0.0418866	0.042768	0.0399863	0.0474334	0.0447773	0.0519131	0.0640277
118	0.0545895	0.0456436	0.0442039	0.0340071	0.0407332	0.0267991	0.0504009	0.0383528	0.0475597	0.0481329	0.0394969	0.0521585	0.0413061	0.0508163	0.0491441	0.0242626	0.0584096	0.0543555	0.0383406	0.038038	0.0343739	0.0427139	0.0500296	0.0479038	0.0392604	0.0516803	0.0318689	0.059237	0.059554	0.0542846	0.0595397	0.0619978	0.0743497	0.0668624	0.0809556	0.0298045	0.0474086	0.0452898	0.0433446	0.0335538	0.0451309	0.0433595	0.0431269	0.0429218	0.0393334	0.0489253	0.0474517	0.0532677	0.0630853
120	0.0515436	0.0430407	0.0422911	0.0342067	0.0389166	0.0256984	0.0505529	0.0387509	0.0475495	0.0477098	0.0399785	0.049222	0.039734	0.0486775	0.0448177	0.0234666	0.0545778	0.0554887	0.0352163	0.0368429	0.0338256	0.0393752	0.0498419	0.0456006	0.0388747	0.05257	0.0319031	0.0589584	0.0600772	0.0517965	0.0566204	0.062404	0.0720227	0.0688823	0.084637	0.0285022	0.048508	0.0458028	0.0403242	0.0331442	0.0446089	0.0431997	0.0437452	0.0424645	0.0382093	0.047317	0.0455881	0.0522131	0.0629943
122	0.0555309	0.0436635	0.0414568	0.0343051	0.041124	0.0279863	0.0531344	0.0384533	0.0505812	0.047396	0.0398411	0.0483189	0.0400835	0.0478081	0.0452916	0.0216725	0.0534738	0.0531833	0.0362702	0.0387972	0.0387178	0.0413108	0.0473029	0.0464122	0.0408046	0.0536591	0.0317451	0.0599949	0.0611885	0.0504082	0.0570832	0.0609722	0.0740434	0.0701404	0.0853118	0.0250356	0.0498503	0.0464566	0.0402243	0.0330678	0.0453762	0.0430414	0.0421622	0.0439515	0.0392404	0.0477376	0.0454452	0.0508954	0.0616705
124	0.0476001	0.0416261	0.0387789	0.0371811	0.0434733	0.0291867	0.0529291	0.0403094	0.0485397	0.0481682	0.0398842	0.0494375	0.0411418	0.0471816	0.0451823	0.0223916	0.0515095	0.0523115	0.0366273	0.0405305	0.0398296	0.0430483	0.0481703	0.0456051	0.0402612	0.053718	0.0331516	0.0604911	0.0645244	0.0504379	0.057605	0.0598461	0.0727932	0.0723396	0.0845309	0.0240722	0.0505357	0.0449307	0.0404021	0.0332304	0.0445333	0.0457695	0.0413886	0.0448339	0.0396421	0.0480073	0.0478121	0.0513493	0.062454
126	0.0553971	0.0422196	0.0399648	0.0408766	0.0460082	0.0288607	0.0546284	0.0418714	0.0514372	0.0470718	0.040897	0.0514711	0.0436428	0.0481687	0.0469015	0.0295568	0.0526695	0.0524452	0.0361943	0.041537	0.0409644	0.0433764	0.0520938	0.0459259	0.0460547	0.0527673	0.0345276	0.0611751	0.0673018	0.0539965	0.0624752	0.0626657	0.0738191	0.0738126	0.0888224	0.0286532	0.052724	0.0493064	0.0430809	0.0373672	0.0468933	0.0482557	0.0433139	0.0438182	0.0428957	0.0479025	0.0516924	0.0506276	0.0650901
128	0.0554783	0.0425707	0.039527	0.0371703	0.044451	0.0321343	0.0571687	0.0412951	0.0544411	0.047249	0.0418062	0.0531683	0.0444285	0.0513138	0.0477536	0.0318735	0.0494488	0.0522316	0.0383433	0.0415654	0.0401742	0.0447594	0.0522945	0.0472312	0.0470722	0.0535962	0.0331505	0.0614949	0.0695426	0.054813	0.0627527	0.0636683	0.0761678	0.0760492	0.0865963	0.0248522	0.0574689	0.0469886	0.0438524	0.0386213	0.0471848	0.0472244	0.0444751	0.0448076	0.0452083	0.0502116	0.0511812	0.052713	0.0716959
130	0.0613973	0.0472613	0.042294	0.0417077	0.0486253	0.0328642	0.0583735	0.0419335	0.0531675	0.0524897	0.0476318	0.0595814	0.0467258	0.0567924	0.0516397	0.0365029	0.054101	0.0561517	0.0430254	0.0473015	0.0439421	0.0472563	0.0548849	0.050301	0.0501528	0.0556168	0.0329411	0.0649279	0.0728175	0.0582719	0.0663867	0.0673031	0.0811755	0.0782754	0.086059	0.0272686	0.0566951	0.0501273	0.0482007	0.0408179	0.0495263	0.0495564	0.0466516	0.0485743	0.049943	0.05181	0.053366	0.0564457	0.0731109
132	0.0602988	0.0457687	0.0424441	0.0430863	0.0463775	0.0316416	0.0575329	0.0410628	0.0505323	0.0519144	0.0487629	0.0569149	0.0475406	0.0542622	0.0506484	0.0398285	0.0545982	0.0590539	0.0421143	0.0474413	0.0402722	0.0474148	0.0535913	0.0500454	0.0493465	0.056833	0.0323116	0.063494	0.0740167	0.0598	0.0652968	0.0688548	0.0799717	0.0788026	0.0820809	0.0279015	0.0563766	0.0475233	0.0482485	0.0401182	0.0492475	0.0499481	0.0475851	0.0458674	0.0462861	0.0509061	0.0529316	0.0543126	0.0729483
134	0.0611629	0.0470787	0.0445373	0.0429273	0.0452174	0.0316235	0.0571886	0.0412918	0.0541986	0.0538256	0.0508306	0.0589709	0.0501395	0.0578725	0.053705	0.0387351	0.0515587	0.0598132	0.0451289	0.0458101	0.0407211	0.0486774	0.0554407	0.0549997	0.0513892	0.0604223	0.0353742	0.0653494	0.0725489	0.061615	0.0646342	0.0734833	0.0815339	0.0789151	0.0854759	0.0302462	0.0588314	0.0493972	0.0515954	0.043798	0.0533853	0.050818	0.0499467	0.048881	0.0480641	0.0525964	0.0517124	0.0540187	0.0770332
136	0.0528133	0.0479344	0.044297	0.0433046	0.0445225	0.03548	0.0604582	0.0446715	0.0534818	0.0576853	0.0545561	0.0598292	0.0511973	0.0576368	0.0559494	0.0339183	0.0564827	0.0617738	0.0488349	0.0451135	0.042145	0.0509162	0.0550632	0.0554212	0.0473708	0.0621477	0.0357523	0.065802	0.0693776	0.0601371	0.0635605	0.0735675	0.0816324	0.0779392	0.0875606	0.0322592	0.058565	0.0490679	0.051795	0.0431793	0.0573798	0.0512984	0.049915	0.0493923	0.0498401	0.0553458	0.0504671	0.0570131	0.0736938
138	0.0637255	0.0459287	0.0439277	0.0439111	0.0477599	0.0343718	0.0606004	0.0450267	0.0521816	0.0588528	0.0547366	0.0598435	0.0531582	0.0549	0.0577393	0.0341257	0.0592608	0.0644827	0.0476873	0.0420039	0.0443994	0.0510628	0.0571035	0.055902	0.0481428	0.0651148	0.036491	0.0675346	0.0676997	0.0619902	0.0613959	0.0734925	0.0797144	0.0746533	0.089029	0.0341989	0.05775	0.0525659	0.0521169	0.0444064	0.0567714	0.0531028	0.0517375	0.0465912	0.0504275	0.0559214	0.049833	0.0558019	0.0754619
140	0.0643601	0.0439131	0.0453767	0.0466607	0.049198	0.0373478	0.0619135	0.0481065	0.0572124	0.0576157	0.0508146	0.0594474	0.0558575	0.0548068	0.0592698	0.036869	0.0615463	0.0661308	0.0490866	0.0420638	0.0463989	0.0532533	0.0615685	0.0590197	0.0484232	0.0671423	0.0384001	0.0669226	0.0672448	0.0643541	0.0624379	0.072302	0.0798726	0.0737766	0.0893087	0.0383113	0.0612205	0.0522444	0.0551604	0.0461661	0.0606452	0.0523916	0.0554578	0.0457636	0.0518568	0.0567155	0.0503815	0.0561844	0.0775244
142	0.0639859	0.0482338	0.0472791	0.0513253	0.0513865	0.0371478	0.0616012	0.0515022	0.0606971	0.0601476	0.0536326	0.0628948	0.0567838	0.0584403	0.0600343	0.0415628	0.0663891	0.0674776	0.0516425	0.0429069	0.0489687	0.0551232	0.0646847	0.0625037	0.048868	0.0709365	0.040938	0.0698085	0.06745	0.067857	0.068194	0.075915	0.0824732	0.076705	0.0918313	0.0373865	0.0608222	0.059702	0.0598977	0.0500127	0.0639481	0.0536925	0.0576828	0.0497861	0.0562282	0.0606479	0.0530147	0.0615473	0.0782412
144	0.0655602	0.0535869	0.0442246	0.0517301	0.0530572	0.0376158	0.0638412	0.0538363	0.0589996	0.058751	0.0534821	0.0633081	0.0574519	0.0565467	0.0597321	0.043014	0.0694888	0.0713186	0.0511752	0.0470198	0.0524238	0.0585562	0.0653866	0.0608808	0.0503974	0.0720727	0.041326	0.0707379	0.0689829	0.0682223	0.0695393	0.0743909	0.0837205	0.0779546	0.0923779	0.0377605	0.0612822	0.0601607	0.0596013	0.0481915	0.0603248	0.0532783	0.0587374	0.0479874	0.056366	0.0621013	0.0567385	0.0647846	0.0776329
146	0.0643264	0.0549089	0.0479262	0.0493189	0.0533403	0.0393042	0.0621274	0.0520415	0.0604722	0.0563367	0.0517509	0.063139	0.0592818	0.060699	0.0588491	0.0500231	0.0663999	0.0750949	0.0515436	0.0500928	0.049792	0.0599455	0.0632672	0.0632909	0.0530643	0.0737841	0.044277	0.0717587	0.0732746	0.0704021	0.0725325	0.0749812	0.0884352	0.0799631	0.0946571	0.0357498	0.0634749	0.0594669	0.0611281	0.0483991	0.0598944	0.0550455	0.0614485	0.0495712	0.0552773	0.060272	0.0552374	0.0669245	0.0805337
148	0.0671883	0.0591332	0.0512333	0.0500768	0.0513954	0.041225	0.061349	0.0506397	0.0627607	0.0561547	0.05059	0.0609796	0.0528184	0.0610779	0.0593122	0.0502911	0.0630174	0.071693	0.0522153	0.05478	0.0490194	0.0604867	0.062739	0.063306	0.0543671	0.0727424	0.0449739	0.068609	0.0741066	0.0699509	0.0737339	0.0754323	0.0894901	0.0814863	0.09296	0.034513	0.0622919	0.0592603	0.0610427	0.0472714	0.0618281	0.0530699	0.059577	0.0533807	0.0548466	0.0589718	0.0569446	0.0647499	0.0758225
150	0.0673751	0.0590233	0.0472842	0.0443138	0.0463128	0.040331	0.0594877	0.0482487	0.0595738	0.0539926	0.0526838	0.0591288	0.0493694	0.0577763	0.057389	0.0465794	0.0629145	0.0674994	0.0514071	0.0553286	0.0470103	0.0602686	0.0553946	0.0602705	0.0520247	0.0705969	0.0440427	0.0655716	0.0713015	0.066697	0.0702913	0.0731552	0.0864824	0.0821424	0.0932598	0.0279737	0.0626281	0.0559906	0.0558968	0.0458831	0.0577549	0.0535892	0.0560265	0.0521009	0.0484053	0.0584098	0.0540556	0.0639549	0.0753773
152	0.0600035	0.0580388	0.0511026	0.0438678	0.0488548	0.0454916	0.0609098	0.0512931	0.0609415	0.0549009	0.0545973	0.061587	0.0535426	0.0595209	0.0598583	0.0458001	0.0605314	0.0705274	0.0508961	0.0557726	0.0464371	0.0594891	0.0570613	0.0612217	0.0563092	0.0692686	0.0453583	0.0667496	0.0745639	0.0690364	0.0745234	0.0757567	0.0852174	0.0823816	0.0963452	0.0335974	0.0673861	0.0571408	0.0555707	0.0470271	0.0580229	0.0542749	0.0590892	0.0543843	0.0512006	0.0593522	0.0546566	0.0622981	0.0823235
154	0.0544607	0.0554364	0.0557113	0.0443969	0.0502929	0.0493871	0.0632736	0.0529895	0.0621938	0.0577877	0.0557454	0.0622894	0.053957	0.0595523	0.0601587	0.0491682	0.0624603	0.0708405	0.0529297	0.0581087	0.045489	0.0561099	0.0570675	0.0626233	0.0549661	0.0712087	0.0455472	0.0678499	0.0752088	0.0714656	0.0765595	0.0796722	0.0862612	0.0804972	0.09907	0.0398228	0.066721	0.0604579	0.0544888	0.0498358	0.0615576	0.0575179	0.0599672	0.0581526	0.0515314	0.0609247	0.0556583	0.0625771	0.0850111
156	0.0745709	0.0576117	0.0569804	0.0499921	0.051073	0.0472217	0.0663917	0.055033	0.0641947	0.0609274	0.0567152	0.0649162	0.0520013	0.0602631	0.0626559	0.0511436	0.0630341	0.0695886	0.0575693	0.0602301	0.0493775	0.0565557	0.0592244	0.0631502	0.0585734	0.0705871	0.0462	0.071866	0.0740463	0.0743028	0.0764608	0.0814565	0.0837924	0.0835606	0.0975078	0.0427076	0.0667958	0.0638102	0.0545552	0.0519614	0.0612085	0.0604605	0.0590614	0.0598307	0.0517788	0.0631108	0.0594415	0.0620562	0.0842635
158	0.0729637	0.0577972	0.0577124	0.0530622	0.0552628	0.0450854	0.0694895	0.0584077	0.0662815	0.0645993	0.0580645	0.0666437	0.0592317	0.0634231	0.0644552	0.0493734	0.0704002	0.0769665	0.0612728	0.0599688	0.0501615	0.0583012	0.064334	0.0646781	0.0600076	0.0731775	0.0476698	0.0749009	0.0746215	0.0754027	0.0815854	0.0837808	0.0861901	0.0867502	0.103423	0.0463373	0.0675519	0.0670649	0.0577707	0.0524452	0.0618389	0.0653863	0.0613473	0.0616176	0.0531164	0.0646622	0.0655045	0.067822	0.0910554
160	0.0764405	0.0625759	0.0640176	0.0606406	0.0596866	0.0480392	0.0743475	0.0625188	0.0689285	0.0714032	0.0607615	0.0737495	0.0669077	0.0689015	0.0684396	0.0519627	0.0685129	0.0805876	0.0653955	0.063484	0.0546907	0.065052	0.0712147	0.0698231	0.0641926	0.0753504	0.0520027	0.0824213	0.0806155	0.0794805	0.0866073	0.0892856	0.0913555	0.0911812	0.105288	0.0532075	0.0685848	0.0713994	0.0638995	0.057741	0.0675686	0.0682898	0.0640115	0.0660487	0.0604251	0.0692708	0.0706208	0.0733749	0.0959363
162	0.0743796	0.0652417	0.063029	0.0645741	0.0603633	0.0485249	0.0750223	0.0621246	0.0713613	0.0753697	0.0633838	0.0755043	0.0673477	0.0725332	0.0722094	0.0537378	0.0708796	0.0836636	0.0721153	0.0647255	0.0608049	0.0676347	0.0725565	0.070483	0.0629911	0.074579	0.0528588	0.0828092	0.0792513	0.0791932	0.0829813	0.0876027	0.0959988	0.0919799	0.108095	0.0529875	0.0670898	0.0691763	0.065948	0.0587391	0.0672451	0.0716679	0.0635278	0.065245	0.0632737	0.0706685	0.0725386	0.0779509	0.0954604
164	0.0785355	0.0676847	0.0656376	0.0690882	0.0597993	0.046198	0.0769829	0.0612133	0.0757978	0.0760585	0.0628265	0.0741598	0.0703245	0.0743435	0.0753357	0.0547907	0.0768914	0.0867297	0.0769123	0.0629426	0.0622516	0.0710527	0.0740909	0.0721848	0.0667719	0.0745253	0.0532531	0.0849983	0.0824858	0.0807151	0.0864415	0.0876494	0.093962	0.0964648	0.105333	0.0511295	0.0679842	0.0693552	0.068836	0.0589487	0.068185	0.0736514	0.0641446	0.065923	0.0650004	0.070614	0.0736087	0.079374	0.0969795
166	0.0804771	0.0670957	0.0655638	0.0704436	0.0614842	0.048381	0.0791094	0.0643709	0.0755905	0.0792769	0.0657821	0.0740062	0.0737218	0.0761991	0.0765097	0.0539993	0.080672	0.0891662	0.0751242	0.0631821	0.0630537	0.0731247	0.0773027	0.0722664	0.0656573	0.0769133	0.0535844	0.0848003	0.0832417	0.0787284	0.0884962	0.0903615	0.0970421	0.0968769	0.109132	0.0542871	0.0669103	0.06916	0.068723	0.0603507	0.0720251	0.0727261	0.0645863	0.0677233	0.0666402	0.0727752	0.0754753	0.0800892	0.100682
168	0.0807637	0.0718143	0.0677641	0.0718773	0.0595733	0.0538183	0.0804706	0.066479	0.0762459	0.0779702	0.0685663	0.0791408	0.0782832	0.0782931	0.0774956	0.0579014	0.0824398	0.0866616	0.0754783	0.0644441	0.0665231	0.0767769	0.0807082	0.0750571	0.0663539	0.0803722	0.0577458	0.091135	0.0853061	0.0814475	0.0861036	0.0914155	0.0977534	0.098342	0.106414	0.0568297	0.0677079	0.0714219	0.0690173	0.0619161	0.0747404	0.0732151	0.0685687	0.0715924	0.0696999	0.0755439	0.0729216	0.0785207	0.0968291
170	0.0837779	0.0726471	0.0663473	0.0718039	0.0611171	0.0539702	0.0818047	0.0654155	0.0817959	0.0776156	0.0689195	0.0743898	0.0782729	0.0821225	0.0780401	0.062815	0.0877288	0.0894135	0.0751819	0.0614082	0.0636797	0.0723174	0.0804496	0.0744674	0.0668875	0.0864053	0.0590347	0.0902252	0.0873233	0.0844858	0.0880452	0.094953	0.0977021	0.0966228	0.109314	0.0580277	0.0688209	0.074201	0.0687774	0.06089	0.0733189	0.0764058	0.0716783	0.0724189	0.0718807	0.076224	0.073428	0.0800023	0.0994174
172	0.0832324	0.0730325	0.0676192	0.0694552	0.0620774	0.0578164	0.0847537	0.0683149	0.0833345	0.0758972	0.067192	0.072453	0.080064	0.0804615	0.0765814	0.0632356	0.08855	0.0878688	0.0723781	0.0649629	0.0619923	0.0753595	0.0806298	0.0783247	0.0697086	0.0885174	0.0614562	0.0948071	0.0906768	0.0854575	0.0893347	0.0999227	0.0985853	0.101604	0.110711	0.060883	0.0717737	0.0759462	0.0695549	0.0624343	0.0750259	0.0773098	0.073251	0.074724	0.0725138	0.0784289	0.0725442	0.0771878	0.0983265
174	0.085165	0.0736308	0.0693989	0.0663013	0.0647287	0.0590383	0.0849626	0.0702665	0.0830306	0.0766429	0.0703538	0.0742113	0.0781048	0.0835772	0.0792164	0.0624727	0.0868776	0.0855677	0.0706534	0.0660018	0.0637236	0.0754722	0.0799193	0.0801676	0.0713421	0.0900884	0.0646649	0.0967689	0.0909643	0.0867396	0.0869322	0.0996674	0.101786	0.100199	0.11576	0.060364	0.0719424	0.0793403	0.069609	0.0650663	0.0774995	0.0765226	0.0759329	0.0741318	0.072498	0.0806108	0.0712277	0.0791739	0.0975691
176	0.0866734	0.074298	0.0705902	0.0650521	0.0697454	0.0606286	0.0859865	0.0702735	0.084502	0.0757128	0.0689213	0.0759861	0.0805845	0.0847149	0.0785602	0.0582601	0.0897621	0.087159	0.0729882	0.0669828	0.0658908	0.0785392	0.0793302	0.0867147	0.073241	0.0925341	0.0651395	0.0982289	0.0923016	0.0928143	0.0910342	0.101077	0.103678	0.10094	0.117372	0.0593022	0.0774385	0.0804718	0.0717186	0.0669458	0.0790306	0.0792525	0.0809318	0.0749872	0.0734287	0.082117	0.0731697	0.0810387	0.100013
178	0.0865127	0.074207	0.0711767	0.0662733	0.0758396	0.0656119	0.0876509	0.0744108	0.084459	0.0796164	0.0713154	0.0758384	0.0793413	0.0881941	0.081246	0.0652283	0.0905864	0.0900442	0.0728159	0.069326	0.0616932	0.0783064	0.0757849	0.0864649	0.0745189	0.0932858	0.0669684	0.0994852	0.0947921	0.0938578	0.0965507	0.103446	0.105506	0.101731	0.120548	0.0608725	0.0813623	0.0801869	0.0747045	0.0680911	0.0796508	0.0813308	0.079254	0.0712547	0.0736434	0.0828238	0.0748276	0.0853581	0.102568
180	0.090417	0.0751875	0.0750209	0.0689982	0.0804621	0.0676843	0.0902372	0.0784631	0.0816048	0.0838743	0.0721097	0.0797745	0.0793828	0.0881932	0.082792	0.0654371	0.0949963	0.0943532	0.0766679	0.0745877	0.06403	0.0800236	0.0754626	0.090347	0.0788977	0.0910864	0.068541	0.102575	0.0936851	0.0935185	0.0972886	0.103681	0.107511	0.103527	0.125477	0.0665824	0.084486	0.0846188	0.0767891	0.0727649	0.0811173	0.0836417	0.0808814	0.0762653	0.0734493	0.0824268	0.0784198	0.0835715	0.103825
182	0.0904908	0.0762098	0.0780472	0.0720599	0.0832338	0.0671851	0.0920811	0.079197	0.0793494	0.0878538	0.0732363	0.0846977	0.0796977	0.0899036	0.0838388	0.0683205	0.0927416	0.0972398	0.077585	0.0740278	0.0657275	0.0777785	0.0786398	0.0896721	0.082369	0.0954703	0.0695276	0.102738	0.0948395	0.095104	0.102176	0.0989697	0.105864	0.101044	0.126765	0.0655277	0.0846182	0.0860807	0.0772513	0.0710859	0.0829307	0.0853492	0.0827187	0.076809	0.0719164	0.0800058	0.08192	0.0903598	0.104855
184	0.0939221	0.0793964	0.0797174	0.0781149	0.0874956	0.0705208	0.0940543	0.0813196	0.0820438	0.0902138	0.0759455	0.0859301	0.0807543	0.0889614	0.0848223	0.0737903	0.0937025	0.101308	0.0782228	0.0766089	0.0701047	0.0809065	0.0829812	0.0875749	0.0859663	0.0988743	0.0707261	0.104443	0.0973545	0.099819	0.103726	0.101053	0.109565	0.102452	0.124775	0.0663851	0.0889306	0.0838405	0.0789862	0.0734348	0.0832949	0.087079	0.0843713	0.0780429	0.0723617	0.0818042	0.0847672	0.0914918	0.104737
186	0.0918137	0.0792141	0.0795995	0.0801913	0.0857082	0.0738861	0.0961612	0.0794465	0.0831829	0.0898717	0.0782936	0.0864481	0.0811873	0.0878475	0.0850305	0.080898	0.0919667	0.098306	0.0785853	0.077974	0.0683945	0.0804183	0.0860359	0.0854064	0.0885796	0.0990116	0.0717808	0.106488	0.0981213	0.0978998	0.101177	0.101822	0.109284	0.101798	0.126307	0.0690943	0.0889298	0.0833987	0.0801392	0.0721165	0.0831454	0.088153	0.0837264	0.0832368	0.0732422	0.0812773	0.0840649	0.0915002	0.105761
188	0.0945006	0.0793155	0.081263	0.0807207	0.0895709	0.0718566	0.0986808	0.0805355	0.0854803	0.0905169	0.081621	0.086184	0.082116	0.0887309	0.0853432	0.0807216	0.0958978	0.102125	0.0827483	0.0790858	0.0749051	0.0813112	0.0876761	0.090776	0.092305	0.100711	0.0692586	0.105463	0.0994665	0.0986458	0.0965779	0.102391	0.110633	0.104901	0.128345	0.0715234	0.0924181	0.0837765	0.08236	0.0744891	0.0850317	0.0913573	0.0844929	0.0899959	0.0753579	0.0818877	0.0859288	0.0932588	0.108775
190	0.0943052	0.0803665	0.0820801	0.0822452	0.090973	0.0744618	0.0995851	0.0846581	0.0891898	0.090906	0.0829113	0.0858089	0.0863798	0.0910472	0.0912897	0.0840781	0.0948147	0.104374	0.0818079	0.0771588	0.0802348	0.0868083	0.0928081	0.0920073	0.0912039	0.102505	0.0708695	0.107384	0.102648	0.101071	0.100477	0.104877	0.112754	0.10943	0.128567	0.0705767	0.092433	0.0822239	0.0868461	0.0750591	0.08679	0.0913777	0.0839795	0.087416	0.0775603	0.081565	0.0908942	0.102073	0.106574
192	0.0983496	0.0862445	0.0799595	0.0852342	0.0903414	0.0755354	0.0990654	0.0859229	0.0941644	0.0875878	0.0849992	0.0831602	0.0853896	0.0926888	0.0922734	0.0886826	0.102888	0.105043	0.0852612	0.0799798	0.0797106	0.0860172	0.0929958	0.0925718	0.0909038	0.100797	0.0727049	0.108367	0.100239	0.102661	0.0983785	0.107063	0.112375	0.111189	0.126409	0.0732628	0.0952389	0.0838764	0.0891669	0.0753576	0.0874877	0.0921567	0.0828187	0.0867006	0.077509	0.0842834	0.0930513	0.0997565	0.107264
194	0.102848	0.0856462	0.0797608	0.085808	0.0887183	0.0756772	0.101431	0.0828938	0.0961188	0.0896811	0.0847158	0.08969	0.0910418	0.0973685	0.0933942	0.0883384	0.10455	0.103179	0.0860853	0.080321	0.0795405	0.0870635	0.0931423	0.0969571	0.0883643	0.0968502	0.075023	0.10989	0.0991492	0.100305	0.102116	0.110001	0.116142	0.115806	0.130535	0.0784863	0.0941691	0.0880248	0.0882261	0.0724944	0.0887738	0.095575	0.0838679	0.0886258	0.0792086	0.0829554	0.0929316	0.102127	0.112461
196	0.0961617	0.0906168	0.0839293	0.0896499	0.089061	0.0763208	0.102876	0.0883266	0.0998384	0.0942491	0.0871822	0.0890983	0.0936907	0.100544	0.10046	0.0873358	0.108465	0.107892	0.0874291	0.0830732	0.0851162	0.0875236	0.0930028	0.0979681	0.0910165	0.09948	0.0785463	0.112762	0.101123	0.104266	0.103994	0.11274	0.119313	0.123222	0.132445	0.0773946	0.0961204	0.0916562	0.0920593	0.0768952	0.0909651	0.0946802	0.0846066	0.0867848	0.0846058	0.0860627	0.0945756	0.108886	0.115053
198	0.101504	0.0938836	0.088509	0.0930388	0.0928104	0.0774734	0.106286	0.0880694	0.104602	0.0951878	0.0859567	0.0900987	0.0958092	0.100809	0.104497	0.0848723	0.107379	0.110067	0.084845	0.0847819	0.0839838	0.0907425	0.0993915	0.0993414	0.093963	0.0999319	0.0826631	0.114069	0.101188	0.106304	0.109988	0.11483	0.120192	0.128577	0.133756	0.0749428	0.0969008	0.0950948	0.0923895	0.0796697	0.0910242	0.097237	0.0881326	0.0835509	0.0859745	0.0854644	0.0970361	0.109542	0.114943
200	0.104777	0.0976576	0.0909064	0.0932426	0.0905725	0.0764813	0.11025	0.0873649	0.105253	0.0938317	0.0859126	0.0950336	0.0986435	0.102969	0.102611	0.0847056	0.108081	0.110469	0.0872007	0.0857843	0.0830395	0.0925262	0.0996312	0.10088	0.098411	0.100582	0.0831602	0.113946	0.102607	0.106671	0.110983	0.11514	0.123243	0.127027	0.136661	0.0737365	0.0983146	0.0950227	0.0936169	0.0822217	0.0952116	0.0973938	0.0893693	0.0840012	0.0886956	0.0868582	0.0938165	0.108985	0.117528
202	0.106683	0.0975061	0.0957725	0.0939688	0.0953197	0.0766092	0.114056	0.0886267	0.105266	0.0962951	0.0898117	0.100457	0.101667	0.103464	0.108317	0.0830018	0.109134	0.113806	0.0889869	0.0866507	0.08724	0.0949388	0.102674	0.101344	0.100598	0.0999105	0.0830721	0.116455	0.105658	0.105355	0.113093	0.11811	0.130856	0.129373	0.141364	0.078105	0.0970552	0.0964402	0.0969722	0.083323	0.0978383	0.100414	0.0925663	0.088303	0.0944269	0.0902749	0.0948107	0.11501	0.122104
204	0.106973	0.103018	0.0977506	0.0922103	0.0960462	0.0791806	0.115388	0.0922117	0.105582	0.0947896	0.0953247	0.0990148	0.0987942	0.106478	0.111343	0.0845656	0.110525	0.119788	0.0932372	0.0854281	0.0885956	0.0957477	0.105932	0.102332	0.102573	0.103055	0.0822205	0.115502	0.110204	0.106598	0.114425	0.120974	0.127276	0.131983	0.142164	0.0797096	0.096833	0.0952589	0.104141	0.0861929	0.0999385	0.10207	0.0965541	0.090154	0.102275	0.0937464	0.0979332	0.120056	0.12415
206	0.107948	0.106057	0.10092	0.0905967	0.0996134	0.0791121	0.116754	0.0918832	0.104549	0.0957535	0.0923237	0.102838	0.101666	0.109575	0.11095	0.0858393	0.11287	0.127919	0.095432	0.0854726	0.0896847	0.101956	0.110408	0.101092	0.104634	0.102802	0.0817626	0.115063	0.111023	0.105071	0.114878	0.121237	0.127222	0.12833	0.139955	0.0859601	0.0968891	0.099317	0.10374	0.0865498	0.101543	0.105624	0.100407	0.092216	0.102016	0.0930302	0.101081	0.119941	0.123401
208	0.109713	0.107886	0.0999493	0.0887866	0.0946117	0.0823237	0.111896	0.0916826	0.100125	0.0994369	0.0922262	0.106891	0.103978	0.111029	0.107837	0.0868831	0.114201	0.127982	0.100499	0.0850702	0.0957288	0.105286	0.105925	0.100378	0.103439	0.104883	0.0831995	0.115058	0.108931	0.108413	0.119054	0.122651	0.12973	0.125292	0.144467	0.09078	0.0993865	0.0986565	0.105243	0.0870949	0.103641	0.103121	0.10161	0.0941434	0.101909	0.0989244	0.102845	0.120181	0.125382
210	0.112817	0.111873	0.101399	0.0894201	0.0980922	0.0849646	0.11347	0.0917292	0.100126	0.0997275	0.0956256	0.108774	0.100463	0.110807	0.107858	0.0882806	0.113586	0.126924	0.102501	0.0866274	0.0979198	0.102335	0.110278	0.100443	0.101612	0.10912	0.0856217	0.115998	0.109364	0.108166	0.11626	0.124893	0.127459	0.128163	0.14364	0.0928119	0.0983892	0.0997149	0.10271	0.0829173	0.105006	0.105118	0.103697	0.0964483	0.098515	0.10129	0.107175	0.119974	0.126508
212	0.112796	0.112697	0.10518	0.0900041	0.0977185	0.085617	0.118823	0.0943073	0.101756	0.102327	0.0919891	0.108596	0.103952	0.116775	0.107313	0.0891101	0.117903	0.12503	0.0997603	0.0893091	0.102537	0.108289	0.113495	0.106596	0.102326	0.115103	0.0860557	0.11813	0.109324	0.112891	0.121697	0.128033	0.129194	0.128172	0.146527	0.0952235	0.100538	0.101599	0.102726	0.0849603	0.107006	0.105914	0.105811	0.0966352	0.0954243	0.101267	0.113628	0.119283	0.125383
214	0.111203	0.106745	0.109126	0.0931736	0.0993191	0.0860293	0.119144	0.0967959	0.105426	0.106231	0.0925974	0.110471	0.108039	0.116133	0.109282	0.09218	0.11949	0.1203	0.0982767	0.0940531	0.10399	0.109233	0.114901	0.107802	0.107148	0.115929	0.0905848	0.122299	0.112195	0.114432	0.121551	0.128534	0.132496	0.128098	0.149466	0.101081	0.101013	0.102275	0.105635	0.0852533	0.105634	0.107142	0.10632	0.0990263	0.0928458	0.102951	0.114324	0.117224	0.126979
216	0.114992	0.103363	0.110029	0.093278	0.100316	0.0874788	0.119259	0.0963658	0.110628	0.106506	0.0957874	0.113533	0.106482	0.115632	0.1121	0.0958769	0.118566	0.119084	0.0970261	0.0956922	0.104693	0.106542	0.113493	0.114221	0.10755	0.120959	0.091829	0.123654	0.110995	0.116434	0.12381	0.128617	0.136278	0.130797	0.152472	0.0989705	0.103467	0.100918	0.112421	0.0860683	0.106428	0.105219	0.105597	0.0977322	0.0925825	0.107515	0.112657	0.11709	0.123632
218	0.118795	0.105319	0.115727	0.099923	0.105031	0.0894603	0.125803	0.10176	0.116666	0.108273	0.0991629	0.115124	0.10955	0.117823	0.120637	0.0997829	0.121509	0.119898	0.0984433	0.10422	0.104793	0.106555	0.118028	0.117047	0.110526	0.122768	0.0907454	0.13092	0.119195	0.119412	0.124238	0.132827	0.140425	0.133516	0.155564	0.102749	0.103923	0.101373	0.111857	0.0875912	0.109595	0.108713	0.109695	0.104357	0.0961494	0.107924	0.112285	0.123195	0.127647
220	0.118487	0.107305	0.11619	0.103781	0.107227	0.0928277	0.126019	0.10574	0.120504	0.111732	0.104402	0.116311	0.111786	0.122938	0.126423	0.103429	0.12537	0.119625	0.103574	0.112099	0.105945	0.110195	0.114742	0.12195	0.114779	0.122898	0.092126	0.137261	0.123443	0.12394	0.130774	0.130759	0.146765	0.134829	0.160843	0.107789	0.10808	0.104661	0.117237	0.093387	0.11006	0.113031	0.1119	0.102963	0.101439	0.110597	0.111612	0.124422	0.126471
222	0.12646	0.106983	0.114667	0.109564	0.108998	0.0944638	0.127662	0.106716	0.122639	0.113394	0.106768	0.122322	0.110105	0.11873	0.127566	0.107831	0.125787	0.122107	0.107174	0.113962	0.102641	0.11048	0.114015	0.121146	0.118484	0.12395	0.0975638	0.137882	0.125358	0.126556	0.132453	0.13283	0.147343	0.138365	0.165492	0.110417	0.113399	0.11048	0.1189	0.0955456	0.111693	0.114485	0.113638	0.104635	0.104574	0.11348	0.108269	0.12806	0.131657
224	0.125457	0.115812	0.117376	0.107145	0.107649	0.094332	0.130887	0.106291	0.124622	0.114395	0.102184	0.12633	0.110186	0.118568	0.12541	0.107551	0.126324	0.131381	0.106944	0.113953	0.101135	0.113911	0.118658	0.127029	0.119934	0.129997	0.0976972	0.137516	0.125257	0.132008	0.135389	0.134433	0.146781	0.142451	0.16641	0.105624	0.119961	0.114689	0.114408	0.0946551	0.115979	0.114926	0.112918	0.106761	0.103022	0.113508	0.109833	0.130559	0.128949
226	0.125856	0.118361	0.119984	0.114521	0.11099	0.0988526	0.133749	0.111472	0.123851	0.115319	0.106618	0.12477	0.112167	0.119376	0.126995	0.107954	0.130523	0.134262	0.109772	0.114012	0.103748	0.117647	0.121681	0.12885	0.120131	0.131883	0.0980457	0.138904	0.131041	0.133486	0.140159	0.135409	0.147283	0.139581	0.167422	0.107555	0.121897	0.118712	0.112979	0.0941001	0.118746	0.118818	0.114371	0.10958	0.106391	0.114442	0.115921	0.134226	0.137306
228	0.123704	0.118558	0.115947	0.1156	0.10862	0.0954841	0.133955	0.112015	0.12562	0.116962	0.104022	0.1237	0.110923	0.120597	0.122816	0.110205	0.128626	0.144184	0.108257	0.106648	0.104564	0.118147	0.12168	0.130384	0.12005	0.133495	0.101531	0.136004	0.131894	0.1325	0.142336	0.136289	0.143967	0.14131	0.164705	0.103453	0.122339	0.122072	0.115991	0.0972913	0.120762	0.119877	0.112727	0.105499	0.106331	0.114694	0.118472	0.12768	0.136095
230	0.128316	0.123649	0.127326	0.118414	0.1167	0.0977632	0.13784	0.111721	0.131039	0.122499	0.0997912	0.124537	0.114043	0.11993	0.121388	0.111347	0.132148	0.151176	0.109771	0.109478	0.104831	0.122935	0.125439	0.128798	0.120925	0.134882	0.102323	0.137243	0.133076	0.132822	0.138813	0.143265	0.143247	0.144364	0.163946	0.103529	0.122848	0.125137	0.118511	0.0997401	0.122148	0.116949	0.116558	0.111794	0.105014	0.118358	0.119377	0.131194	0.142848
232	0.127497	0.128136	0.131759	0.115675	0.117271	0.100936	0.137806	0.111469	0.134612	0.123171	0.100716	0.124847	0.116012	0.122554	0.121099	0.108414	0.129929	0.153618	0.111436	0.108597	0.106748	0.124064	0.123661	0.130399	0.119594	0.1365	0.101083	0.140816	0.134116	0.132957	0.139689	0.14432	0.143576	0.145236	0.160451	0.101488	0.121013	0.121196	0.122615	0.101714	0.124199	0.116816	0.11563	0.115948	0.108188	0.119782	0.118891	0.129473	0.146067
234	0.13527	0.130081	0.129148	0.123504	0.12958	0.109442	0.142854	0.116613	0.137631	0.126789	0.102993	0.127413	0.121822	0.129624	0.126207	0.11108	0.136663	0.156786	0.114752	0.113282	0.112778	0.126082	0.123633	0.134535	0.120729	0.139144	0.105192	0.143799	0.137456	0.13362	0.145891	0.150213	0.14806	0.144605	0.163036	0.10756	0.124078	0.123886	0.132491	0.10413	0.129018	0.119745	0.12063	0.116598	0.109957	0.124384	0.12063	0.130704	0.151491
236	0.129727	0.13278	0.132437	0.125312	0.128805	0.106803	0.145457	0.117538	0.143078	0.131993	0.103563	0.132927	0.120971	0.13451	0.128598	0.114254	0.138007	0.157346	0.120966	0.117459	0.116685	0.128134	0.124902	0.135402	0.124882	0.141173	0.109395	0.147297	0.139537	0.138469	0.14525	0.155467	0.155004	0.154769	0.166402	0.10962	0.124149	0.122031	0.132462	0.109146	0.130549	0.124131	0.123642	0.121543	0.113782	0.127607	0.121593	0.132984	0.153268
238	0.141502	0.134519	0.138804	0.122615	0.131634	0.114307	0.146178	0.118047	0.147094	0.133722	0.109755	0.140198	0.127088	0.13682	0.133467	0.117607	0.144481	0.149391	0.125575	0.125514	0.118715	0.132202	0.126829	0.133542	0.129833	0.142408	0.111854	0.149925	0.138361	0.141883	0.144233	0.154631	0.159708	0.154368	0.165548	0.112678	0.125288	0.125399	0.136396	0.106634	0.131196	0.128739	0.126798	0.125666	0.115697	0.130983	0.121782	0.140586	0.155581
240	0.141592	0.128231	0.137328	0.125202	0.128668	0.113859	0.144887	0.11755	0.149261	0.13196	0.116437	0.142576	0.125982	0.137231	0.135376	0.11731	0.147868	0.151457	0.125681	0.122014	0.122141	0.130821	0.127732	0.136425	0.132937	0.145635	0.115837	0.148867	0.140602	0.143125	0.150026	0.152817	0.161643	0.149816	0.167337	0.113367	0.12954	0.1283	0.135993	0.105415	0.133689	0.134116	0.125618	0.125742	0.120802	0.131267	0.126809	0.145976	0.156905
242	0.13863	0.126497	0.13587	0.128844	0.128508	0.119419	0.144908	0.12103	0.150264	0.135231	0.115416	0.144156	0.130272	0.140601	0.142587	0.119632	0.151541	0.153654	0.128316	0.123661	0.122495	0.132566	0.134905	0.141534	0.134992	0.149159	0.121285	0.148546	0.145492	0.141655	0.146237	0.154379	0.166878	0.152726	0.166718	0.109826	0.131336	0.13176	0.134736	0.110659	0.137005	0.140908	0.128602	0.125738	0.122219	0.134994	0.130058	0.149044	0.158563
244	0.140377	0.125088	0.138257	0.127814	0.125524	0.114613	0.143364	0.122693	0.149294	0.133041	0.120648	0.14394	0.128976	0.144482	0.142633	0.122028	0.149239	0.153751	0.133704	0.123164	0.122323	0.134012	0.134428	0.1396	0.135227	0.151474	0.121627	0.152127	0.146692	0.143211	0.148001	0.154356	0.167373	0.161613	0.173359	0.111538	0.128408	0.13054	0.133161	0.114734	0.134522	0.144699	0.129722	0.12503	0.125935	0.133761	0.134694	0.152436	0.158594
246	0.141874	0.125808	0.138621	0.122427	0.128799	0.116265	0.143586	0.126245	0.152162	0.134746	0.120773	0.141412	0.133234	0.14399	0.147481	0.126801	0.147489	0.154077	0.13306	0.123703	0.122257	0.133782	0.134612	0.140241	0.13694	0.152512	0.124399	0.153915	0.150659	0.142203	0.150065	0.156056	0.163713	0.162086	0.173643	0.115139	0.133473	0.135132	0.137807	0.116349	0.13258	0.143765	0.131874	0.124408	0.122163	0.132323	0.132357	0.154028	0.15872
248	0.146503	0.128303	0.137917	0.125762	0.133091	0.117919	0.146994	0.128199	0.149258	0.137214	0.12231	0.136812	0.127509	0.143465	0.147164	0.128418	0.148485	0.162114	0.135693	0.124221	0.125973	0.132995	0.137569	0.143772	0.137812	0.152477	0.12583	0.157202	0.151305	0.145693	0.154124	0.161196	0.164289	0.16782	0.178548	0.12077	0.136224	0.131558	0.139687	0.122445	0.134491	0.141619	0.131196	0.123592	0.123364	0.130624	0.134687	0.15672	0.160018
250	0.143316	0.133156	0.135811	0.121264	0.12879	0.122502	0.151155	0.131235	0.144995	0.137276	0.121076	0.133684	0.130674	0.147243	0.148666	0.129518	0.144359	0.165343	0.134528	0.128387	0.129084	0.134778	0.138041	0.144855	0.136909	0.152606	0.125738	0.159791	0.149984	0.150605	0.156912	0.162543	0.166762	0.173231	0.177073	0.128001	0.138778	0.130905	0.143057	0.125058	0.134812	0.145558	0.134102	0.125693	0.124668	0.131856	0.131595	0.152031	0.162847
252	0.146213	0.135863	0.14217	0.122209	0.133087	0.120881	0.15198	0.129237	0.148691	0.139697	0.125476	0.136957	0.133489	0.149772	0.150284	0.131074	0.143111	0.167521	0.133546	0.132197	0.130577	0.133418	0.136552	0.147026	0.137585	0.153709	0.123846	0.162225	0.151778	0.150712	0.163173	0.16501	0.167422	0.174403	0.184549	0.136488	0.143167	0.133097	0.144982	0.12427	0.137637	0.143556	0.13675	0.12837	0.124112	0.130359	0.131628	0.153499	0.16289
254	0.14914	0.134566	0.142593	0.124151	0.134597	0.1261	0.153004	0.129993	0.151406	0.141844	0.12303	0.136814	0.136421	0.14515	0.154509	0.133951	0.145952	0.165295	0.13301	0.1382	0.132818	0.133016	0.138559	0.148835	0.143759	0.151729	0.126745	0.159781	0.149595	0.151203	0.160036	0.165043	0.168581	0.167289	0.180181	0.135761	0.147329	0.136385	0.146301	0.125218	0.139335	0.146278	0.13898	0.133195	0.126104	0.134691	0.134174	0.156599	0.166926
256	0.148442	0.139267	0.145479	0.129133	0.13447	0.128878	0.153177	0.127963	0.148638	0.143436	0.125357	0.142223	0.138821	0.146192	0.154294	0.130479	0.146488	0.168679	0.13252	0.142517	0.136041	0.129515	0.144235	0.149345	0.145591	0.152901	0.128759	0.161387	0.146994	0.155246	0.160769	0.168995	0.17291	0.166809	0.185266	0.135315	0.145091	0.139981	0.147399	0.121859	0.144438	0.146895	0.144368	0.132591	0.131405	0.137163	0.140079	0.154421	0.171413
258	0.152893	0.143577	0.148079	0.132984	0.13836	0.128076	0.15626	0.130898	0.154785	0.145088	0.125828	0.147131	0.147409	0.152322	0.155097	0.130002	0.146716	0.171014	0.133314	0.143964	0.137972	0.133359	0.145373	0.151828	0.144971	0.158213	0.129285	0.161279	0.151176	0.159018	0.160045	0.173935	0.17479	0.16694	0.189572	0.134582	0.14639	0.144293	0.148657	0.120409	0.151021	0.146796	0.146378	0.133909	0.134161	0.143627	0.142939	0.152361	0.174727
260	0.154036	0.142497	0.147781	0.135956	0.145257	0.128482	0.157047	0.13527	0.162379	0.147214	0.12937	0.150173	0.150101	0.15325	0.155792	0.135736	0.149915	0.171889	0.133767	0.142088	0.138649	0.134468	0.147829	0.156339	0.149106	0.161219	0.130447	0.161863	0.15499	0.158475	0.16155	0.180873	0.177483	0.171388	0.195112	0.13235	0.146576	0.145448	0.145722	0.119459	0.151322	0.148775	0.147799	0.1384	0.132938	0.146272	0.14704	0.154678	0.178888
262	0.157389	0.146727	0.148038	0.140653	0.145997	0.129326	0.15885	0.142324	0.16321	0.148808	0.133191	0.152356	0.147207	0.15309	0.161031	0.142522	0.156915	0.176101	0.139894	0.143275	0.146668	0.14108	0.155544	0.159522	0.152496	0.158573	0.13534	0.164721	0.152504	0.168127	0.166921	0.182637	0.1746	0.172647	0.197482	0.132199	0.148075	0.149463	0.148463	0.122374	0.14986	0.155157	0.150851	0.1393	0.139317	0.146776	0.155137	0.158242	0.180904
264	0.158822	0.150794	0.154639	0.143311	0.147071	0.132292	0.160195	0.142458	0.167677	0.150784	0.142137	0.156727	0.148776	0.158065	0.163533	0.14332	0.159878	0.176329	0.140175	0.141175	0.150484	0.140198	0.161814	0.158603	0.149202	0.164398	0.132234	0.170853	0.155234	0.168155	0.170441	0.185253	0.174997	0.173353	0.201018	0.133588	0.148281	0.14789	0.151312	0.121641	0.151311	0.158067	0.146982	0.13737	0.139029	0.147	0.152709	0.157467	0.180802
266	0.161862	0.150499	0.155321	0.146385	0.151015	0.134905	0.163844	0.143269	0.171748	0.150255	0.143666	0.160886	0.14864	0.160475	0.163493	0.147213	0.165318	0.17637	0.144079	0.138019	0.153134	0.145768	0.163792	0.159227	0.154314	0.16472	0.135757	0.17187	0.160959	0.171556	0.174899	0.183801	0.17348	0.176787	0.197574	0.138861	0.151262	0.150934	0.151964	0.13071	0.151653	0.160473	0.145559	0.14341	0.138854	0.148997	0.153707	0.164473	0.176379
268	0.160658	0.150521	0.153506	0.149466	0.15143	0.13533	0.165529	0.144488	0.171376	0.149786	0.145389	0.161647	0.148322	0.16368	0.163332	0.148371	0.166221	0.171936	0.1493	0.136792	0.154112	0.143723	0.164789	0.164027	0.156084	0.162525	0.139771	0.173496	0.162956	0.168635	0.175403	0.180513	0.182441	0.178924	0.20038	0.141766	0.152677	0.154093	0.15526	0.134929	0.153147	0.163704	0.151978	0.149327	0.140048	0.14828	0.155824	0.170507	0.179703
270	0.161721	0.155654	0.156575	0.154193	0.150023	0.131109	0.167928	0.143578	0.170381	0.151785	0.143873	0.165639	0.14915	0.163851	0.169536	0.14632	0.170795	0.173565	0.159325	0.143004	0.154986	0.14884	0.170655	0.165062	0.157803	0.162822	0.141653	0.179239	0.162668	0.170882	0.178934	0.180715	0.181818	0.182367	0.199903	0.147966	0.152671	0.156934	0.161838	0.134022	0.1562	0.161617	0.15563	0.143877	0.141234	0.151744	0.152322	0.172877	0.178039
272	0.166481	0.154842	0.153512	0.155963	0.153538	0.134707	0.17028	0.144261	0.169823	0.153018	0.141693	0.164244	0.156044	0.162273	0.167602	0.145816	0.167292	0.174599	0.159352	0.146065	0.156145	0.148674	0.168008	0.166847	0.157082	0.167533	0.144983	0.177805	0.165388	0.177156	0.177739	0.18037	0.18357	0.184627	0.200629	0.152802	0.153792	0.15566	0.159266	0.135105	0.158735	0.164576	0.157352	0.142832	0.141198	0.15684	0.147907	0.174674	0.177767
274	0.163945	0.156622	0.154038	0.160776	0.157256	0.133819	0.17279	0.146185	0.169237	0.153507	0.141022	0.163639	0.160117	0.161764	0.167392	0.147482	0.166562	0.182203	0.162055	0.148184	0.155681	0.154622	0.164951	0.17076	0.158053	0.167822	0.148203	0.176993	0.166075	0.180972	0.177528	0.178388	0.186906	0.190735	0.203799	0.155845	0.159313	0.158604	0.163288	0.136332	0.161871	0.163517	0.161503	0.146239	0.148492	0.158161	0.148357	0.174701	0.179536
276	0.166402	0.161666	0.158842	0.161896	0.154911	0.136872	0.175978	0.150311	0.17293	0.153976	0.140964	0.160024	0.160137	0.16642	0.169293	0.147818	0.176391	0.185973	0.165129	0.153346	0.153026	0.157714	0.163454	0.174546	0.158655	0.172844	0.14571	0.178224	0.167075	0.18121	0.177564	0.181503	0.187227	0.189068	0.211058	0.157521	0.165073	0.155448	0.164409	0.133073	0.165554	0.167205	0.164994	0.14605	0.146218	0.153188	0.147771	0.174197	0.186137
278	0.170327	0.164571	0.167348	0.159814	0.150889	0.138282	0.175856	0.151957	0.173702	0.155978	0.14598	0.165198	0.163455	0.164466	0.171454	0.153785	0.1797	0.189542	0.162172	0.156372	0.15253	0.161718	0.165027	0.175106	0.160272	0.179219	0.148711	0.177029	0.171076	0.182002	0.182403	0.181944	0.184295	0.186881	0.211424	0.160507	0.165574	0.159375	0.167596	0.130788	0.162295	0.171773	0.165539	0.14221	0.152052	0.152245	0.147362	0.174179	0.18642
280	0.171658	0.16704	0.175381	0.160532	0.152683	0.147561	0.177831	0.157825	0.174316	0.156094	0.148592	0.165746	0.168141	0.166502	0.176625	0.15983	0.180599	0.191955	0.158822	0.156846	0.155279	0.161778	0.163848	0.175902	0.164307	0.183781	0.152059	0.177058	0.173617	0.187397	0.178817	0.179311	0.193566	0.184118	0.21801	0.156674	0.167997	0.157224	0.167775	0.137467	0.166329	0.177993	0.164438	0.149713	0.156689	0.151618	0.151756	0.176785	0.191515
282	0.174906	0.166037	0.181915	0.163507	0.149886	0.147806	0.180506	0.15892	0.175576	0.154091	0.148762	0.16703	0.167391	0.175016	0.177423	0.161205	0.182198	0.191523	0.155943	0.157803	0.15539	0.161557	0.159155	0.173991	0.164852	0.183468	0.150111	0.178042	0.177486	0.183929	0.178363	0.182323	0.196888	0.185177	0.222298	0.15563	0.166563	0.150829	0.173296	0.135755	0.170348	0.172218	0.164854	0.151152	0.156349	0.151638	0.150838	0.17899	0.196022
284	0.178494	0.158982	0.176101	0.153998	0.142157	0.148393	0.17623	0.158412	0.171509	0.152391	0.139061	0.16612	0.165831	0.173508	0.174458	0.155786	0.174662	0.185489	0.148595	0.152796	0.150811	0.157571	0.156132	0.176312	0.162154	0.178211	0.148975	0.178209	0.175005	0.178508	0.175996	0.180208	0.191751	0.181698	0.213543	0.151032	0.16307	0.145404	0.162995	0.132393	0.164804	0.172302	0.163254	0.149603	0.148577	0.146067	0.146582	0.174006	0.192734
286	0.168616	0.154163	0.17301	0.155223	0.147612	0.150603	0.175184	0.159969	0.175217	0.158399	0.143549	0.169756	0.173879	0.173198	0.173711	0.165475	0.172017	0.18381	0.14678	0.153506	0.154049	0.160277	0.160989	0.180712	0.162068	0.176724	0.15645	0.184235	0.173975	0.185811	0.173184	0.178545	0.197402	0.187749	0.215643	0.150444	0.16318	0.151516	0.164798	0.135292	0.164268	0.17735	0.165784	0.148803	0.152066	0.155494	0.150321	0.173579	0.196021
288	0.147304	0.156722	0.171673	0.158825	0.152085	0.153488	0.180569	0.159388	0.179146	0.162361	0.145674	0.170183	0.173969	0.176483	0.184652	0.164848	0.174069	0.186521	0.156425	0.154836	0.156642	0.164619	0.164303	0.182963	0.168721	0.177657	0.15579	0.191527	0.172082	0.183369	0.180288	0.18314	0.204366	0.19482	0.218172	0.15093	0.161329	0.150414	0.167955	0.138448	0.168815	0.17775	0.16607	0.153479	0.150104	0.159581	0.157493	0.179074	0.199303
290	0.182199	0.160231	0.172235	0.160092	0.157783	0.15387	0.180018	0.163882	0.181858	0.164877	0.147652	0.176052	0.176916	0.179745	0.186403	0.164149	0.175702	0.185445	0.160057	0.159508	0.158281	0.16308	0.167836	0.184461	0.169405	0.177223	0.159825	0.19376	0.172974	0.184669	0.18638	0.187971	0.201901	0.20321	0.218085	0.156231	0.166555	0.155579	0.176886	0.134562	0.167524	0.178238	0.173718	0.156177	0.149867	0.160835	0.162526	0.178848	0.197228
292	0.187561	0.165825	0.180058	0.162097	0.164623	0.159058	0.183192	0.168962	0.185327	0.171353	0.154161	0.181727	0.181681	0.177415	0.187694	0.163143	0.178161	0.189096	0.166458	0.157368	0.161899	0.167416	0.17883	0.186741	0.174661	0.18372	0.162353	0.202412	0.177161	0.185781	0.190788	0.193838	0.20579	0.206661	0.21702	0.157197	0.17094	0.166905	0.181124	0.141784	0.167209	0.182607	0.179256	0.161053	0.152872	0.16359	0.167432	0.184122	0.199853
294	0.186616	0.180797	0.196534	0.174492	0.177248	0.164652	0.193654	0.175569	0.190907	0.177322	0.168368	0.186806	0.187008	0.182347	0.196245	0.174778	0.192559	0.196831	0.181925	0.165552	0.169373	0.172907	0.184822	0.190354	0.180768	0.190712	0.166267	0.20774	0.184619	0.192786	0.197025	0.205553	0.213298	0.212183	0.230222	0.162324	0.172869	0.178969	0.192155	0.151688	0.177704	0.188003	0.184318	0.16388	0.162438	0.171257	0.174856	0.194516	0.211674
296	0.189971	0.190119	0.19986	0.179679	0.182232	0.166953	0.198477	0.182232	0.192646	0.175507	0.170262	0.190634	0.186603	0.188205	0.199838	0.175756	0.194178	0.201803	0.18423	0.165712	0.1711	0.17432	0.187102	0.189555	0.181434	0.193329	0.163573	0.204525	0.183928	0.189919	0.204245	0.211017	0.211731	0.211525	0.232032	0.16626	0.171773	0.175141	0.196939	0.155035	0.18092	0.192779	0.182117	0.163376	0.168225	0.17029	0.173431	0.200729	0.210374
298	0.192155	0.190206	0.20508	0.180963	0.184554	0.171436	0.200203	0.191771	0.198238	0.177229	0.166389	0.19117	0.185218	0.189496	0.194956	0.179166	0.196557	0.200312	0.182051	0.166739	0.173446	0.17719	0.191606	0.193581	0.176111	0.194992	0.167944	0.205932	0.185925	0.200396	0.199931	0.208519	0.208999	0.212227	0.232975	0.171792	0.177585	0.175159	0.197225	0.154132	0.179005	0.194352	0.189858	0.166267	0.168391	0.170622	0.171461	0.199907	0.212383
300	0.193985	0.188764	0.200408	0.182263	0.183194	0.170611	0.203212	0.189162	0.202626	0.180612	0.163078	0.186369	0.181475	0.188183	0.1927	0.178255	0.194634	0.204506	0.178081	0.164175	0.169504	0.180846	0.191242	0.195269	0.17265	0.197466	0.166292	0.210577	0.186222	0.200146	0.196216	0.215143	0.206047	0.204778	0.228062	0.167821	0.176697	0.174625	0.195185	0.157277	0.180203	0.19476	0.188588	0.16482	0.16949	0.172307	0.174927	0.198956	0.212099
302	0.193274	0.189103	0.196925	0.186188	0.185801	0.168922	0.204151	0.189545	0.210512	0.183707	0.164907	0.190319	0.177945	0.195392	0.194077	0.180591	0.195723	0.204056	0.181464	0.165432	0.170034	0.185055	0.193385	0.196297	0.17414	0.197151	0.16752	0.207793	0.184726	0.204107	0.195092	0.218119	0.207243	0.206556	0.233702	0.173189	0.177536	0.175399	0.199508	0.15217	0.1817	0.195056	0.188297	0.167544	0.173418	0.17668	0.175255	0.197598	0.21333
304	0.18914	0.184849	0.192927	0.187951	0.183574	0.167935	0.207388	0.19534	0.211027	0.184958	0.160693	0.192783	0.174683	0.194382	0.19444	0.183888	0.196155	0.206402	0.178385	0.165272	0.169784	0.185654	0.197784	0.197663	0.181627	0.202793	0.173225	0.207285	0.191835	0.212337	0.19715	0.216849	0.213167	0.213154	0.234671	0.179241	0.183968	0.176494	0.198891	0.152022	0.183739	0.198202	0.191492	0.171835	0.172825	0.179988	0.178525	0.200872	0.209507
306	0.197549	0.184111	0.195387	0.188695	0.181492	0.167916	0.213109	0.192944	0.210505	0.190223	0.157354	0.189708	0.178817	0.189782	0.196981	0.182316	0.199922	0.212398	0.17908	0.167378	0.168914	0.184458	0.200776	0.19852	0.1848	0.204733	0.179471	0.212574	0.194168	0.213964	0.197128	0.21962	0.216547	0.215351	0.23383	0.185067	0.188358	0.179378	0.199353	0.15129	0.185653	0.197033	0.197532	0.177204	0.173839	0.182859	0.18092	0.197507	0.208673
308	0.199921	0.1864	0.191265	0.193138	0.186684	0.166646	0.215551	0.191193	0.211659	0.19106	0.161416	0.194781	0.186909	0.192976	0.203146	0.181245	0.204727	0.216351	0.179024	0.16906	0.166749	0.185644	0.20099	0.199634	0.194481	0.209273	0.180015	0.210474	0.192464	0.213089	0.200341	0.229549	0.219546	0.213924	0.235465	0.185618	0.192141	0.182508	0.19904	0.152712	0.188108	0.199741	0.19588	0.178167	0.178901	0.191692	0.181535	0.197226	0.205668
310	0.201893	0.18572	0.198619	0.200237	0.186379	0.171652	0.214879	0.193063	0.215088	0.190676	0.168798	0.203705	0.196951	0.200667	0.205537	0.186824	0.216121	0.211215	0.184936	0.169418	0.17809	0.186926	0.202694	0.20075	0.198757	0.213103	0.183327	0.211923	0.197663	0.213424	0.203847	0.227122	0.226001	0.223931	0.245932	0.188082	0.195962	0.185884	0.199354	0.152857	0.195588	0.205593	0.196436	0.179895	0.181635	0.193983	0.186319	0.203344	0.20806
312	0.203238	0.190502	0.195456	0.202933	0.192187	0.17579	0.217596	0.194141	0.2121	0.193443	0.169471	0.202478	0.202357	0.205114	0.213045	0.19138	0.225825	0.219028	0.180941	0.177452	0.180361	0.181667	0.200103	0.204483	0.202831	0.221825	0.188896	0.217185	0.19974	0.216536	0.207505	0.224497	0.227482	0.22818	0.242279	0.190263	0.20411	0.193784	0.201176	0.160148	0.198704	0.211294	0.197359	0.180223	0.180011	0.191466	0.189665	0.206686	0.206154
314	0.206267	0.196	0.194153	0.202706	0.18839	0.174922	0.21759	0.193242	0.216312	0.194727	0.170502	0.207306	0.19996	0.211897	0.210184	0.193104	0.222688	0.216581	0.177104	0.176089	0.179992	0.181022	0.198648	0.201076	0.200249	0.219347	0.190996	0.21723	0.196258	0.215975	0.203621	0.221615	0.223266	0.224055	0.241399	0.183729	0.20038	0.191731	0.206068	0.161715	0.200402	0.207404	0.1968	0.179108	0.186515	0.189898	0.192265	0.199787	0.207332
316	0.21115	0.200031	0.194945	0.212593	0.193069	0.177478	0.213889	0.196215	0.215353	0.194882	0.175981	0.213118	0.197548	0.214172	0.212968	0.19777	0.223664	0.217596	0.178582	0.181454	0.184438	0.185328	0.196205	0.203812	0.205575	0.222324	0.189385	0.218963	0.20777	0.2195	0.207252	0.22287	0.228374	0.228513	0.244053	0.179663	0.201099	0.188486	0.209046	0.165015	0.202059	0.207732	0.196898	0.180273	0.183452	0.190307	0.19618	0.206283	0.212054
318	0.194316	0.205084	0.202765	0.214626	0.190716	0.182614	0.21684	0.19619	0.212594	0.194111	0.18076	0.219407	0.200414	0.209241	0.216872	0.202436	0.223378	0.223387	0.180073	0.185527	0.190605	0.187971	0.201123	0.2054	0.207798	0.220942	0.19119	0.224036	0.215079	0.221797	0.202752	0.222212	0.22838	0.236914	0.247272	0.182064	0.203287	0.188923	0.211739	0.169216	0.205808	0.209688	0.194578	0.186458	0.185311	0.184627	0.196496	0.211857	0.219851
320	0.208353	0.212136	0.200021	0.216342	0.200695	0.185121	0.222688	0.196788	0.213326	0.199312	0.185191	0.215496	0.195436	0.212214	0.224871	0.209958	0.218649	0.232372	0.1844	0.187141	0.187436	0.189551	0.202981	0.208919	0.212148	0.221783	0.19016	0.224143	0.217363	0.231539	0.209598	0.221881	0.236353	0.236789	0.252282	0.188578	0.203592	0.186358	0.216362	0.17384	0.209115	0.209465	0.197203	0.190343	0.186199	0.183878	0.191215	0.213404	0.227443
322	0.216257	0.214004	0.21575	0.213474	0.199086	0.186274	0.224716	0.199048	0.215449	0.202793	0.192641	0.219096	0.200537	0.212747	0.226288	0.213303	0.218325	0.231585	0.189745	0.187032	0.191609	0.195002	0.209424	0.21027	0.215535	0.217274	0.190538	0.223417	0.22296	0.232059	0.209507	0.230749	0.239957	0.23917	0.26511	0.187408	0.200477	0.181917	0.211593	0.170536	0.213875	0.213494	0.206132	0.193368	0.195399	0.186957	0.197993	0.216197	0.233537
324	0.220544	0.210459	0.218707	0.216491	0.21319	0.194117	0.224597	0.192973	0.220054	0.210823	0.199328	0.218925	0.211641	0.213622	0.234422	0.213324	0.228569	0.242155	0.19652	0.197796	0.204755	0.208716	0.216632	0.220951	0.220091	0.225412	0.192941	0.233966	0.225906	0.236948	0.219024	0.239154	0.251335	0.244908	0.2715	0.200232	0.208416	0.192016	0.216165	0.173911	0.216157	0.223236	0.211326	0.195062	0.195004	0.190721	0.203419	0.224559	0.235462
326	0.222931	0.210461	0.222529	0.216081	0.213562	0.193206	0.233457	0.19316	0.229459	0.210631	0.202855	0.223532	0.217071	0.221167	0.239533	0.21444	0.231575	0.2431	0.205244	0.199081	0.207752	0.210257	0.221646	0.225144	0.220493	0.229205	0.192217	0.23672	0.221853	0.240544	0.222611	0.245959	0.245834	0.246118	0.273544	0.209327	0.209179	0.201604	0.216785	0.172005	0.220099	0.22576	0.218393	0.199137	0.20431	0.192119	0.201855	0.228122	0.235969
328	0.223503	0.213918	0.22122	0.223177	0.224668	0.196007	0.237895	0.195872	0.234836	0.217226	0.205083	0.219919	0.222795	0.230943	0.249747	0.219594	0.239327	0.247871	0.213903	0.205707	0.21042	0.21003	0.221655	0.229159	0.22045	0.234814	0.201001	0.246431	0.225809	0.249322	0.231921	0.252	0.251325	0.244433	0.278535	0.212993	0.210572	0.211277	0.219773	0.179789	0.227121	0.237883	0.224128	0.197196	0.210055	0.193885	0.206606	0.231873	0.241769
330	0.228746	0.215671	0.228305	0.227055	0.224186	0.199956	0.239513	0.197791	0.236828	0.214474	0.203541	0.228723	0.231611	0.232063	0.252279	0.217191	0.245063	0.250422	0.212227	0.212216	0.217201	0.215563	0.227768	0.23899	0.224108	0.238757	0.206266	0.248906	0.22759	0.253329	0.234052	0.259164	0.245648	0.245955	0.281389	0.215798	0.215391	0.217337	0.221956	0.181975	0.226132	0.241913	0.22903	0.20166	0.21194	0.197131	0.208549	0.238309	0.240622
332	0.240346	0.217417	0.220471	0.228594	0.224072	0.20215	0.244477	0.196117	0.241758	0.211088	0.19747	0.233053	0.233034	0.234409	0.251953	0.220435	0.250681	0.257499	0.216119	0.214666	0.214653	0.215635	0.226201	0.245008	0.228462	0.247688	0.210105	0.249878	0.226213	0.255468	0.238604	0.256496	0.248332	0.247672	0.28424	0.221008	0.220737	0.222456	0.229811	0.186458	0.226157	0.244144	0.229202	0.205607	0.207149	0.201042	0.207073	0.243003	0.24184
334	0.232597	0.225179	0.223401	0.23501	0.226442	0.206785	0.248162	0.204382	0.249384	0.206684	0.195674	0.237339	0.238122	0.239653	0.255817	0.226898	0.250011	0.26876	0.218509	0.207621	0.21345	0.210887	0.230202	0.244129	0.228743	0.249289	0.216412	0.249618	0.227236	0.254963	0.241059	0.257487	0.255219	0.252342	0.286853	0.220642	0.219853	0.21964	0.229	0.190079	0.231945	0.241961	0.239137	0.213974	0.214561	0.206897	0.206579	0.248874	0.25304
336	0.234206	0.228185	0.230419	0.231717	0.232217	0.214228	0.24589	0.207325	0.249905	0.209503	0.197063	0.23508	0.239235	0.242091	0.252985	0.225969	0.246708	0.271522	0.216888	0.20819	0.219059	0.213607	0.23032	0.249566	0.227926	0.251841	0.224272	0.252873	0.235037	0.257417	0.247034	0.255161	0.262128	0.252148	0.294579	0.221775	0.220479	0.219049	0.23699	0.195841	0.233637	0.246905	0.238292	0.211671	0.217612	0.216486	0.215166	0.250548	0.260424
338	0.239563	0.224138	0.235688	0.225638	0.229901	0.211361	0.247079	0.211313	0.254296	0.209742	0.193541	0.239242	0.236072	0.245268	0.241806	0.22708	0.244707	0.267726	0.212947	0.212276	0.216809	0.217942	0.232262	0.248054	0.233857	0.250873	0.221383	0.246904	0.240317	0.258757	0.24804	0.258821	0.263824	0.25828	0.295231	0.221266	0.224804	0.216687	0.242273	0.189434	0.231251	0.236335	0.240622	0.216763	0.216343	0.222919	0.217354	0.254223	0.257217
340	0.238824	0.233356	0.238495	0.231483	0.235058	0.214817	0.251493	0.216107	0.260248	0.215604	0.200074	0.24004	0.23668	0.242598	0.246033	0.235676	0.25519	0.267935	0.220534	0.210359	0.221857	0.224165	0.241536	0.245941	0.236665	0.249111	0.228963	0.244424	0.242851	0.25652	0.246415	0.263625	0.263473	0.265936	0.29489	0.225816	0.226651	0.220205	0.245944	0.189637	0.234839	0.235373	0.242579	0.214812	0.225712	0.229314	0.220698	0.255741	0.259706
342	0.241971	0.237635	0.246045	0.237127	0.242595	0.218419	0.257747	0.223028	0.267057	0.222151	0.209647	0.243507	0.24138	0.244998	0.253687	0.241916	0.255871	0.267352	0.218076	0.215204	0.22781	0.233599	0.247276	0.24982	0.237185	0.248071	0.234986	0.251323	0.245099	0.26836	0.250789	0.270893	0.271669	0.271058	0.280654	0.231161	0.227339	0.21859	0.251509	0.191608	0.239812	0.238948	0.24332	0.214622	0.229901	0.233527	0.222654	0.256362	0.26292
344	0.249011	0.247128	0.256896	0.234719	0.245909	0.220792	0.263316	0.228162	0.26547	0.228256	0.213817	0.246706	0.245109	0.247639	0.255798	0.246121	0.265746	0.259393	0.223634	0.226718	0.229433	0.237115	0.246781	0.249354	0.23818	0.246769	0.231956	0.254395	0.250901	0.271816	0.250665	0.27131	0.271087	0.273752	0.279035	0.23735	0.229774	0.223949	0.257587	0.191839	0.237661	0.24323	0.240301	0.214903	0.229791	0.231322	0.226959	0.259539	0.256974
346	0.253375	0.245331	0.257405	0.243354	0.250531	0.218774	0.266882	0.230279	0.266762	0.233994	0.21709	0.250797	0.251784	0.250648	0.260449	0.253615	0.275113	0.256513	0.226582	0.229887	0.234068	0.239454	0.252849	0.247674	0.239734	0.248283	0.229637	0.253288	0.249912	0.281972	0.251323	0.275438	0.272765	0.282833	0.275924	0.236364	0.232011	0.223401	0.262151	0.18596	0.240312	0.244939	0.241254	0.221694	0.228839	0.230529	0.223315	0.264979	0.258537
348	0.250886	0.247192	0.263916	0.248621	0.256999	0.225426	0.274526	0.232779	0.270661	0.233659	0.218526	0.247026	0.257198	0.251356	0.264439	0.252174	0.275641	0.270611	0.233847	0.232655	0.239601	0.242129	0.254313	0.250784	0.235922	0.250813	0.235441	0.260699	0.253751	0.280936	0.258447	0.270295	0.276195	0.286999	0.279674	0.23566	0.23587	0.223736	0.267459	0.190073	0.244321	0.25384	0.246557	0.219441	0.235106	0.232614	0.223109	0.265703	0.259356
350	0.251504	0.240672	0.264537	0.243172	0.25097	0.221889	0.280282	0.236827	0.268157	0.239276	0.213535	0.248825	0.257943	0.257668	0.259098	0.251596	0.271031	0.277151	0.235711	0.235513	0.23629	0.239518	0.243876	0.255833	0.235036	0.260711	0.235792	0.265728	0.253091	0.282781	0.2589	0.273058	0.280772	0.287753	0.27833	0.235313	0.236411	0.22396	0.270714	0.193863	0.244478	0.258778	0.248639	0.223425	0.23354	0.232166	0.229105	0.267207	0.263938
352	0.25615	0.244258	0.264838	0.251578	0.251255	0.224278	0.278407	0.240335	0.263518	0.237743	0.211355	0.250031	0.256113	0.25988	0.25779	0.253822	0.272321	0.283732	0.248307	0.233056	0.234398	0.239612	0.250929	0.257262	0.240262	0.260924	0.233869	0.265514	0.257907	0.278241	0.261464	0.274495	0.276208	0.276976	0.292062	0.232842	0.24654	0.224546	0.276051	0.194083	0.245665	0.258721	0.252014	0.229237	0.237862	0.235809	0.234405	0.266118	0.2688
354	0.253161	0.242039	0.268381	0.255095	0.255271	0.228566	0.281234	0.240877	0.26657	0.245136	0.21425	0.254517	0.261855	0.262351	0.257102	0.252085	0.268277	0.286702	0.254262	0.237051	0.238788	0.23802	0.252059	0.262062	0.251864	0.270816	0.240409	0.265344	0.263025	0.280878	0.266548	0.282844	0.274726	0.277314	0.299925	0.233862	0.251282	0.223643	0.281987	0.196328	0.252704	0.268719	0.262135	0.230514	0.238053	0.248067	0.239251	0.265923	0.276065
356	0.263247	0.246821	0.270893	0.258636	0.255162	0.234717	0.287654	0.246478	0.272127	0.243147	0.213703	0.259124	0.259165	0.267164	0.264255	0.257869	0.274389	0.297833	0.261227	0.240046	0.239412	0.245115	0.255594	0.267343	0.258261	0.278282	0.24795	0.271444	0.264188	0.281653	0.269301	0.284561	0.280697	0.281993	0.30702	0.234238	0.258538	0.236005	0.276863	0.201232	0.258642	0.274779	0.271216	0.229712	0.237938	0.254043	0.245984	0.269177	0.275662
358	0.27197	0.255605	0.266387	0.262305	0.253165	0.239644	0.28385	0.247778	0.278386	0.246243	0.219227	0.2665	0.25552	0.269252	0.264793	0.264208	0.279422	0.295239	0.257801	0.234433	0.244921	0.248122	0.258587	0.276039	0.26497	0.286827	0.248259	0.270165	0.262772	0.283462	0.269449	0.291276	0.279241	0.283968	0.310889	0.241452	0.258878	0.240515	0.272613	0.205472	0.265555	0.276845	0.273874	0.233089	0.238274	0.25661	0.249368	0.264427	0.280314
360	0.271753	0.259189	0.268859	0.270861	0.265315	0.244029	0.283803	0.253817	0.287545	0.244104	0.222622	0.26725	0.26039	0.277697	0.271296	0.260364	0.287721	0.298304	0.25941	0.237824	0.248756	0.249945	0.265172	0.275628	0.270459	0.285898	0.249243	0.2775	0.271328	0.282806	0.274924	0.289436	0.285578	0.279555	0.314256	0.247637	0.264649	0.2482	0.275008	0.207071	0.263484	0.278585	0.282253	0.233374	0.243341	0.261232	0.251402	0.261856	0.280948
362	0.268458	0.260691	0.27241	0.264842	0.27346	0.24448	0.286965	0.252457	0.294054	0.247466	0.22169	0.272991	0.263289	0.281311	0.270092	0.257885	0.287762	0.300923	0.260277	0.237319	0.251604	0.24723	0.258916	0.272601	0.279814	0.294688	0.247161	0.288388	0.276173	0.289819	0.271256	0.295382	0.286836	0.297682	0.31729	0.256206	0.255435	0.255645	0.271628	0.205548	0.264085	0.283362	0.283397	0.230576	0.246028	0.260581	0.249182	0.264148	0.283921
364	0.270174	0.260575	0.268069	0.273897	0.268498	0.245777	0.287594	0.254681	0.30117	0.24165	0.222122	0.272625	0.259321	0.285537	0.277225	0.26143	0.294518	0.304312	0.257949	0.235555	0.256701	0.252078	0.260455	0.280454	0.276018	0.293412	0.246866	0.290007	0.277945	0.294462	0.270876	0.302761	0.294733	0.302665	0.317442	0.254257	0.256776	0.254049	0.270237	0.208162	0.264778	0.280331	0.279153	0.231431	0.243514	0.254709	0.247416	0.272087	0.281278
366	0.272329	0.262772	0.271703	0.272843	0.271363	0.248753	0.291699	0.255999	0.305051	0.243751	0.226842	0.278677	0.275358	0.283749	0.278187	0.258537	0.300055	0.308835	0.255316	0.2336	0.263222	0.250155	0.262492	0.284047	0.276679	0.296147	0.248855	0.289488	0.284588	0.285785	0.271	0.307885	0.301578	0.298692	0.319266	0.262229	0.254998	0.247748	0.278034	0.218533	0.261035	0.285149	0.279574	0.238754	0.249667	0.252292	0.249514	0.272481	0.285329
368	0.275799	0.267289	0.285081	0.27962	0.264685	0.250428	0.295511	0.256593	0.303731	0.249937	0.227581	0.286918	0.284056	0.290097	0.286573	0.258703	0.296701	0.310756	0.263845	0.239613	0.261463	0.253306	0.263461	0.280391	0.281255	0.295193	0.252135	0.29041	0.283754	0.291335	0.271389	0.317544	0.300719	0.29984	0.31997	0.265683	0.255187	0.246502	0.281893	0.218262	0.263448	0.288383	0.282256	0.244969	0.248992	0.254774	0.254924	0.283681	0.285554
370	0.283372	0.276495	0.295901	0.279958	0.27294	0.260742	0.300396	0.25252	0.306353	0.254053	0.231991	0.291526	0.289038	0.290801	0.291117	0.264167	0.296415	0.318224	0.269581	0.242391	0.26468	0.257914	0.268089	0.282501	0.280383	0.302754	0.259116	0.28728	0.288122	0.304763	0.273388	0.323339	0.30127	0.307566	0.322023	0.268998	0.253495	0.248196	0.277741	0.219229	0.263736	0.2968	0.282627	0.24183	0.246787	0.256837	0.255585	0.294738	0.286501
372	0.284814	0.277054	0.295286	0.280584	0.267104	0.267628	0.303982	0.251704	0.308337	0.259326	0.233364	0.291642	0.291657	0.295044	0.299411	0.269049	0.301364	0.324275	0.272668	0.244629	0.269192	0.268844	0.275608	0.292645	0.274087	0.301379	0.275622	0.278726	0.287043	0.308828	0.281013	0.319172	0.31407	0.311025	0.322597	0.271518	0.261535	0.244975	0.278452	0.226618	0.269723	0.297379	0.282226	0.244112	0.249583	0.258836	0.263008	0.297674	0.288316
374	0.289053	0.279166	0.300703	0.282998	0.266491	0.268642	0.308943	0.257806	0.307357	0.266651	0.23685	0.295422	0.301918	0.295243	0.301462	0.274223	0.302383	0.33035	0.275904	0.247563	0.26684	0.275295	0.276768	0.295214	0.278518	0.302854	0.273241	0.285001	0.288814	0.312046	0.28256	0.315602	0.308819	0.316141	0.323405	0.275426	0.266558	0.250907	0.283191	0.228647	0.269258	0.294102	0.283972	0.247263	0.257872	0.263995	0.266651	0.293603	0.293489
376	0.287485	0.285507	0.299695	0.282554	0.267209	0.270752	0.300648	0.26001	0.314324	0.273452	0.233803	0.295268	0.29446	0.302949	0.300658	0.282105	0.29844	0.334375	0.277146	0.252775	0.266261	0.278381	0.275784	0.291611	0.287945	0.302175	0.273633	0.289773	0.283091	0.320429	0.283755	0.319576	0.307344	0.320251	0.324292	0.279773	0.276728	0.259176	0.286439	0.22715	0.273854	0.291718	0.284873	0.249844	0.257552	0.264263	0.268587	0.29679	0.297175
378	0.292069	0.283239	0.295116	0.287015	0.280129	0.275614	0.306354	0.267529	0.311165	0.274208	0.236135	0.292814	0.290793	0.31019	0.302209	0.292516	0.306785	0.340026	0.277325	0.257686	0.273965	0.275503	0.275699	0.301392	0.282307	0.30794	0.27434	0.293801	0.290191	0.325526	0.288886	0.315045	0.308774	0.318347	0.333224	0.285701	0.2808	0.266899	0.287814	0.231822	0.270448	0.298208	0.285407	0.249415	0.265339	0.263709	0.268521	0.294063	0.301766
380	0.291082	0.284245	0.28993	0.291618	0.273065	0.268729	0.303606	0.274858	0.316851	0.278613	0.236939	0.29719	0.291427	0.31282	0.30576	0.297651	0.307497	0.344666	0.274037	0.258875	0.274766	0.277172	0.272665	0.30698	0.291193	0.314401	0.27546	0.298132	0.287113	0.323709	0.289971	0.320758	0.314481	0.324949	0.340711	0.288107	0.281068	0.269289	0.295488	0.232664	0.276003	0.299289	0.287502	0.258946	0.266653	0.264385	0.269301	0.29705	0.305013
382	0.294778	0.285969	0.294468	0.299137	0.28112	0.269204	0.305432	0.28395	0.320837	0.277099	0.24387	0.299183	0.292245	0.310079	0.309686	0.302278	0.318264	0.338952	0.276533	0.261327	0.282301	0.282197	0.278084	0.306888	0.293563	0.31399	0.269346	0.307226	0.289701	0.322947	0.290681	0.325676	0.31122	0.323449	0.341755	0.293527	0.283349	0.275729	0.297624	0.234913	0.276358	0.301906	0.292056	0.261519	0.26619	0.269734	0.270342	0.29881	0.30272
384	0.298237	0.296527	0.300377	0.304723	0.294215	0.270179	0.313133	0.290534	0.329172	0.284802	0.248778	0.302827	0.288675	0.316865	0.319561	0.302851	0.329781	0.345902	0.280008	0.270267	0.283984	0.282654	0.284636	0.311131	0.299734	0.323875	0.280078	0.312497	0.292953	0.328547	0.297394	0.336397	0.323582	0.323633	0.345171	0.30145	0.28608	0.284609	0.301604	0.236028	0.282331	0.314563	0.294434	0.266936	0.268954	0.274141	0.270033	0.305042	0.309949
386	0.304491	0.300073	0.304879	0.315581	0.295265	0.270616	0.320721	0.298775	0.321122	0.285771	0.25349	0.310683	0.293235	0.316436	0.325472	0.301927	0.329816	0.345681	0.286595	0.272607	0.281257	0.283121	0.291944	0.317725	0.300047	0.334251	0.284808	0.319477	0.296671	0.332257	0.303848	0.340808	0.329788	0.32903	0.349465	0.298412	0.286306	0.291193	0.298328	0.237758	0.284267	0.320035	0.305134	0.264883	0.271289	0.27859	0.272403	0.303867	0.307831
388	0.316376	0.302134	0.302678	0.316616	0.297299	0.26918	0.324728	0.297453	0.332842	0.29188	0.256025	0.317799	0.301452	0.320085	0.336382	0.300349	0.329976	0.349056	0.28277	0.272875	0.276542	0.29316	0.293224	0.317636	0.30936	0.331029	0.288205	0.324478	0.301251	0.335552	0.308052	0.340845	0.338574	0.335184	0.347295	0.295739	0.289133	0.291381	0.306959	0.234187	0.287824	0.321092	0.307779	0.266735	0.272408	0.281106	0.278467	0.308889	0.312661
390	0.307864	0.29759	0.30893	0.319667	0.301328	0.276579	0.340152	0.301345	0.330468	0.294227	0.260231	0.320891	0.306628	0.32379	0.337402	0.305544	0.33513	0.348759	0.288995	0.273719	0.277966	0.296828	0.298561	0.323959	0.306456	0.332001	0.28907	0.330973	0.312893	0.336556	0.316219	0.337494	0.342287	0.340836	0.351127	0.296579	0.295548	0.29092	0.309828	0.234827	0.303374	0.323458	0.310931	0.270505	0.277861	0.286388	0.282909	0.312625	0.318056
392	0.310582	0.30238	0.309003	0.315773	0.299611	0.278313	0.339617	0.307943	0.331864	0.299533	0.26357	0.325998	0.309925	0.329334	0.336122	0.308587	0.32547	0.358124	0.283526	0.277725	0.273336	0.292597	0.300725	0.327778	0.308519	0.34369	0.289729	0.339311	0.319201	0.335409	0.31883	0.342672	0.344645	0.337797	0.352428	0.296866	0.291927	0.284574	0.313557	0.235061	0.297111	0.325055	0.312151	0.271826	0.281401	0.287223	0.284847	0.313421	0.318861
394	0.317277	0.296105	0.304141	0.30905	0.290993	0.280267	0.341412	0.305624	0.330051	0.297192	0.255708	0.323213	0.314716	0.326675	0.335254	0.308163	0.313068	0.353632	0.278224	0.27077	0.276875	0.294635	0.296155	0.32225	0.305619	0.338935	0.285443	0.337109	0.321335	0.337459	0.312191	0.337102	0.332136	0.335224	0.352823	0.295268	0.292704	0.279809	0.308825	0.23543	0.295071	0.317922	0.31159	0.272032	0.279655	0.283897	0.287294	0.313608	0.314616
396	0.305161	0.299494	0.310344	0.305669	0.295231	0.284302	0.350272	0.306681	0.331203	0.300878	0.258768	0.322574	0.316811	0.332993	0.342403	0.308365	0.320515	0.357118	0.28411	0.276482	0.282362	0.302521	0.296502	0.330083	0.308644	0.337109	0.285892	0.338257	0.331215	0.341288	0.31481	0.343039	0.336122	0.337562	0.358022	0.299554	0.296784	0.276039	0.31898	0.236487	0.308282	0.325346	0.306768	0.276374	0.285402	0.290895	0.295615	0.317238	0.326411
398	0.307003	0.306431	0.332604	0.313527	0.297741	0.29059	0.352772	0.311802	0.33457	0.302772	0.263566	0.32532	0.3233	0.333549	0.338868	0.304358	0.327338	0.359376	0.29512	0.279636	0.292924	0.294603	0.307472	0.33381	0.312015	0.347557	0.286325	0.342493	0.33215	0.34635	0.314558	0.3563	0.342034	0.339027	0.367638	0.310363	0.300854	0.282503	0.320032	0.246666	0.310192	0.330159	0.31362	0.278233	0.283151	0.302054	0.298812	0.319355	0.330939
400	0.330478	0.311594	0.333243	0.320363	0.303411	0.292635	0.345785	0.311704	0.338283	0.309713	0.262147	0.32456	0.322132	0.333161	0.340316	0.313856	0.332404	0.359191	0.294954	0.28589	0.291991	0.299048	0.3102	0.33211	0.318333	0.348862	0.289631	0.350159	0.325615	0.34292	0.314503	0.367745	0.341872	0.337889	0.370091	0.316193	0.303678	0.281284	0.324206	0.255476	0.305103	0.33804	0.316758	0.281249	0.282998	0.303016	0.296936	0.31825	0.336116
402	0.334732	0.318764	0.336372	0.330486	0.31173	0.296957	0.348594	0.30637	0.341369	0.316599	0.262433	0.325766	0.332547	0.334924	0.348679	0.322425	0.338809	0.354808	0.30331	0.289401	0.295457	0.303673	0.306271	0.337159	0.315311	0.351684	0.29426	0.348376	0.327697	0.350006	0.318167	0.365978	0.347768	0.347042	0.377587	0.322215	0.320567	0.289963	0.330408	0.259761	0.315321	0.345419	0.318391	0.289089	0.290172	0.306223	0.29596	0.33181	0.346742
404	0.334117	0.319487	0.341795	0.339234	0.314665	0.294745	0.338826	0.304701	0.342541	0.311854	0.263794	0.329133	0.333672	0.334411	0.347718	0.326495	0.343949	0.34973	0.306062	0.287307	0.296171	0.299278	0.317932	0.344101	0.320489	0.35424	0.302301	0.351208	0.328617	0.350786	0.32729	0.36569	0.354193	0.347112	0.377491	0.321682	0.31936	0.287008	0.33429	0.261566	0.320144	0.351683	0.317921	0.291448	0.289129	0.310495	0.30163	0.331023	0.347307
406	0.333616	0.317071	0.346082	0.341761	0.318924	0.303609	0.339787	0.307728	0.354325	0.316204	0.261775	0.327932	0.337438	0.338211	0.347861	0.336536	0.346193	0.354081	0.3002	0.286985	0.297784	0.299691	0.323187	0.347762	0.316016	0.35672	0.303451	0.353187	0.32806	0.35085	0.328293	0.361335	0.347368	0.34834	0.378794	0.322053	0.321998	0.288896	0.333225	0.264993	0.314077	0.350535	0.317764	0.293558	0.297501	0.304095	0.29932	0.334244	0.353963
408	0.313704	0.308474	0.344288	0.335301	0.322607	0.30546	0.341367	0.308176	0.35636	0.309449	0.263978	0.333104	0.341107	0.334683	0.353093	0.34611	0.356147	0.360003	0.300567	0.28616	0.297663	0.308572	0.32818	0.348655	0.320772	0.355925	0.310799	0.355966	0.325706	0.352088	0.329359	0.357586	0.344078	0.355953	0.379183	0.317994	0.327935	0.294392	0.333711	0.267889	0.31126	0.354254	0.320933	0.295915	0.298769	0.300088	0.298427	0.338465	0.355164
410	0.336707	0.318821	0.356071	0.333611	0.328269	0.315453	0.348759	0.312875	0.363891	0.304951	0.270624	0.337888	0.344916	0.341746	0.3561	0.348002	0.359522	0.368637	0.303257	0.28795	0.307177	0.306968	0.331373	0.357845	0.3227	0.360617	0.30959	0.35032	0.331788	0.364891	0.334048	0.35857	0.350869	0.355731	0.380769	0.31808	0.332467	0.297653	0.335132	0.272419	0.315347	0.348605	0.324204	0.2997	0.300947	0.306418	0.308549	0.346535	0.356055
412	0.341909	0.321016	0.365388	0.329961	0.329125	0.318598	0.351814	0.326222	0.373901	0.303782	0.273878	0.338754	0.344967	0.346446	0.351293	0.347641	0.366842	0.373512	0.301932	0.290646	0.309383	0.305023	0.336492	0.354159	0.333156	0.353832	0.317726	0.350447	0.336139	0.364154	0.343738	0.367498	0.354648	0.359475	0.386897	0.322716	0.322968	0.304728	0.336617	0.276564	0.324236	0.348394	0.32558	0.298363	0.301353	0.306663	0.315829	0.341821	0.358066
414	0.348624	0.337871	0.369207	0.335991	0.339091	0.329839	0.367074	0.335355	0.379711	0.316563	0.288107	0.344035	0.350177	0.35926	0.35773	0.358491	0.388529	0.383167	0.318385	0.305328	0.317897	0.314601	0.340562	0.353744	0.337876	0.361173	0.319968	0.359454	0.338278	0.366343	0.346914	0.379127	0.360064	0.368744	0.398353	0.341299	0.336714	0.324018	0.343376	0.280892	0.330095	0.361329	0.341962	0.302915	0.308995	0.314521	0.320798	0.349935	0.364971
416	0.344927	0.349914	0.371465	0.336745	0.343686	0.327406	0.370108	0.331647	0.384423	0.315984	0.295941	0.35334	0.349551	0.358428	0.359008	0.35694	0.383828	0.383091	0.32716	0.310663	0.322124	0.316103	0.340996	0.358658	0.345252	0.35676	0.326636	0.363727	0.343479	0.375293	0.348546	0.380272	0.364864	0.375938	0.402077	0.362917	0.335161	0.328142	0.34446	0.279225	0.333357	0.365763	0.346945	0.305373	0.311705	0.320318	0.323303	0.357184	0.360041
418	0.359474	0.358613	0.364756	0.34085	0.345319	0.329229	0.380113	0.336547	0.386693	0.32957	0.298534	0.350637	0.348299	0.365059	0.354596	0.362715	0.38079	0.386792	0.323492	0.314345	0.325139	0.319815	0.331586	0.362041	0.346189	0.359327	0.328738	0.365814	0.353568	0.37562	0.348827	0.386966	0.372285	0.371686	0.397805	0.363352	0.329142	0.327097	0.350726	0.279978	0.341763	0.366073	0.352372	0.315622	0.32264	0.322637	0.323667	0.362301	0.366078
420	0.353725	0.352786	0.363142	0.342041	0.346024	0.325068	0.380078	0.344004	0.386759	0.333238	0.301416	0.357562	0.351912	0.363041	0.355295	0.361721	0.37968	0.387469	0.328614	0.311287	0.335317	0.318623	0.335356	0.357864	0.343116	0.363186	0.334732	0.376948	0.355669	0.381369	0.352355	0.390323	0.367131	0.375821	0.399871	0.363554	0.329758	0.334676	0.352796	0.280998	0.343411	0.370051	0.353468	0.313021	0.330526	0.322934	0.316196	0.366242	0.367482
422	0.355455	0.358353	0.370854	0.351601	0.347492	0.329185	0.389097	0.34	0.38582	0.338136	0.303816	0.361069	0.353051	0.3671	0.361496	0.378531	0.379138	0.397448	0.33128	0.310423	0.336794	0.32343	0.340662	0.368181	0.342568	0.374565	0.33692	0.380851	0.358206	0.394288	0.349477	0.398399	0.364016	0.373418	0.40167	0.360675	0.339099	0.330142	0.3571	0.281608	0.340502	0.379049	0.362778	0.317529	0.32964	0.328224	0.315873	0.370356	0.365383
424	0.361367	0.348608	0.373067	0.354978	0.353919	0.337519	0.393403	0.343816	0.389654	0.340073	0.301411	0.371826	0.363109	0.370437	0.356484	0.382708	0.369294	0.406469	0.331589	0.308124	0.33312	0.331065	0.340121	0.374858	0.34628	0.377085	0.346183	0.381232	0.362835	0.40517	0.355389	0.40228	0.3734	0.37856	0.405158	0.353256	0.335329	0.322015	0.358676	0.292142	0.344311	0.381618	0.358106	0.326023	0.333141	0.33431	0.315819	0.383287	0.368164
426	0.36129	0.35433	0.382543	0.365604	0.364854	0.33699	0.398881	0.358171	0.394983	0.341877	0.296729	0.373103	0.371029	0.375318	0.362191	0.388732	0.378609	0.406571	0.334622	0.314489	0.336056	0.336163	0.342707	0.370125	0.344162	0.387911	0.348971	0.383449	0.364794	0.408923	0.354626	0.409095	0.386184	0.380024	0.409945	0.34266	0.344689	0.326342	0.366144	0.304325	0.348475	0.385321	0.361359	0.33026	0.331759	0.341543	0.321434	0.382261	0.371131
428	0.369845	0.359343	0.39271	0.371256	0.366667	0.34278	0.397358	0.363088	0.394049	0.342234	0.297864	0.375766	0.377605	0.375096	0.366019	0.389277	0.384215	0.411274	0.340132	0.317414	0.336008	0.334912	0.351945	0.37521	0.348258	0.391534	0.355655	0.38639	0.369601	0.40965	0.357336	0.414391	0.392706	0.382151	0.413627	0.351667	0.358347	0.324362	0.368391	0.30647	0.354997	0.392066	0.359193	0.329632	0.326617	0.344423	0.325497	0.383379	0.362135
430	0.37373	0.366765	0.401307	0.382034	0.374466	0.346981	0.405178	0.358803	0.398204	0.343319	0.295885	0.384079	0.383077	0.37911	0.365047	0.389111	0.388192	0.413367	0.341338	0.320869	0.336998	0.339802	0.348722	0.376615	0.357043	0.394195	0.36259	0.387998	0.372648	0.416369	0.355415	0.412919	0.400316	0.389213	0.416222	0.368537	0.367681	0.324668	0.381241	0.310079	0.355467	0.395985	0.373314	0.334915	0.327703	0.344373	0.34784	0.386402	0.371039
432	0.370979	0.369913	0.397276	0.382754	0.385447	0.350098	0.413528	0.366651	0.4091	0.349327	0.300888	0.383446	0.38592	0.383995	0.377169	0.381763	0.395219	0.414403	0.348858	0.332907	0.345222	0.35352	0.350704	0.378484	0.362132	0.397538	0.364968	0.393286	0.376662	0.415569	0.357025	0.404139	0.405406	0.401655	0.413546	0.37017	0.367136	0.334308	0.383557	0.317992	0.361134	0.398193	0.380571	0.338958	0.333899	0.345593	0.350709	0.394929	0.375896
434	0.379234	0.382588	0.406739	0.38434	0.388249	0.352834	0.415294	0.369038	0.415023	0.355091	0.308551	0.381497	0.379354	0.389707	0.391594	0.389962	0.406855	0.423736	0.348727	0.33611	0.356801	0.357644	0.364304	0.38229	0.363914	0.397042	0.365165	0.399784	0.38414	0.414656	0.357884	0.404699	0.404151	0.405843	0.418552	0.375475	0.369063	0.335512	0.393359	0.316512	0.363036	0.400338	0.380746	0.3401	0.339093	0.343548	0.359179	0.396961	0.379047
436	0.38287	0.386482	0.406106	0.390579	0.381926	0.364779	0.422285	0.371925	0.412047	0.366272	0.319911	0.382327	0.385375	0.397156	0.393306	0.393992	0.422888	0.442834	0.352012	0.339639	0.362272	0.365785	0.36814	0.391848	0.378009	0.402109	0.374221	0.403967	0.395807	0.417088	0.365369	0.410389	0.405262	0.415764	0.42331	0.380924	0.367489	0.341167	0.39931	0.318741	0.368965	0.403562	0.386223	0.343442	0.33912	0.347596	0.35943	0.401718	0.383177
438	0.395992	0.392665	0.411507	0.398774	0.387233	0.36393	0.425221	0.376067	0.418765	0.362378	0.323288	0.389592	0.387737	0.407373	0.401998	0.414216	0.418831	0.438882	0.356658	0.339488	0.367466	0.369877	0.37074	0.405335	0.383161	0.411872	0.377031	0.411671	0.393666	0.428207	0.371599	0.406384	0.40489	0.425658	0.433444	0.387992	0.365347	0.347746	0.400976	0.318893	0.365266	0.407651	0.389294	0.341416	0.347115	0.35761	0.363204	0.406009	0.393582
440	0.397125	0.392223	0.412629	0.405228	0.377057	0.36508	0.422602	0.383759	0.421019	0.368319	0.324601	0.386281	0.398604	0.418998	0.414994	0.429764	0.424951	0.445444	0.362356	0.35021	0.367425	0.375252	0.384885	0.413294	0.384188	0.418843	0.382565	0.408237	0.403318	0.432116	0.379036	0.417589	0.410481	0.428521	0.443628	0.383056	0.369034	0.35601	0.394132	0.322089	0.371864	0.415056	0.382769	0.343708	0.351721	0.367689	0.35267	0.408798	0.388945
442	0.393291	0.39841	0.423957	0.418006	0.372033	0.367993	0.426437	0.385045	0.415936	0.362292	0.330124	0.396039	0.404064	0.420481	0.413791	0.43434	0.423422	0.452745	0.364123	0.348448	0.371034	0.366872	0.384414	0.414418	0.388468	0.424932	0.380827	0.408564	0.410763	0.434117	0.383614	0.430786	0.412621	0.42264	0.45351	0.384342	0.375908	0.352541	0.396321	0.326641	0.372311	0.420928	0.387655	0.342169	0.35317	0.369208	0.364078	0.408316	0.39632
444	0.404041	0.401088	0.429132	0.417216	0.377214	0.365394	0.432212	0.383792	0.420777	0.36333	0.331951	0.409129	0.416005	0.416519	0.415836	0.438189	0.423665	0.446018	0.366477	0.353224	0.372017	0.37251	0.381289	0.414071	0.390997	0.431965	0.379518	0.40506	0.412885	0.439378	0.390807	0.440935	0.414371	0.428176	0.458454	0.395728	0.377619	0.361568	0.391292	0.327737	0.379552	0.419624	0.408036	0.337291	0.353044	0.37306	0.368047	0.408921	0.401392
446	0.398805	0.398589	0.425818	0.419683	0.385397	0.35861	0.432854	0.382505	0.428343	0.367099	0.337001	0.414556	0.410136	0.417259	0.415734	0.436114	0.420182	0.440022	0.374424	0.355379	0.372041	0.368376	0.38621	0.422564	0.381039	0.429108	0.381438	0.408765	0.411213	0.446498	0.393155	0.442227	0.415879	0.428211	0.466382	0.393501	0.37988	0.35685	0.387581	0.322322	0.381617	0.41972	0.406732	0.335709	0.362112	0.379303	0.370412	0.406825	0.40559
448	0.406496	0.397585	0.424032	0.416331	0.388981	0.363844	0.43958	0.385537	0.437468	0.375235	0.337565	0.416458	0.413266	0.41861	0.41692	0.430111	0.430158	0.446853	0.382087	0.361192	0.375335	0.371352	0.392591	0.412547	0.374117	0.43335	0.385479	0.406034	0.416216	0.44938	0.403229	0.448522	0.425539	0.436378	0.471264	0.392551	0.38758	0.362297	0.390207	0.326548	0.392624	0.425474	0.410578	0.33981	0.36713	0.373662	0.374152	0.410829	0.410645
450	0.406593	0.410975	0.426275	0.411982	0.399458	0.366674	0.454377	0.393944	0.44638	0.382211	0.353186	0.425243	0.405721	0.42069	0.420634	0.424748	0.446301	0.445535	0.387055	0.359507	0.379344	0.378261	0.396287	0.419186	0.386917	0.432387	0.3855	0.417305	0.415296	0.442353	0.403269	0.451168	0.430955	0.439982	0.46168	0.395638	0.383535	0.367418	0.399736	0.322308	0.389423	0.431966	0.416966	0.339688	0.371125	0.372158	0.379603	0.414826	0.419055
452	0.411258	0.412584	0.425766	0.415008	0.410976	0.368072	0.453921	0.394169	0.448783	0.388073	0.348134	0.430916	0.408209	0.433669	0.423331	0.424104	0.453074	0.447058	0.390319	0.369305	0.37959	0.387916	0.412114	0.428526	0.390105	0.429877	0.388348	0.426799	0.410071	0.445279	0.404197	0.4591	0.443688	0.452457	0.463448	0.400937	0.388028	0.372873	0.401485	0.326841	0.396518	0.437906	0.415243	0.342004	0.374004	0.374697	0.375677	0.410081	0.422956
454	0.416773	0.407299	0.437202	0.422441	0.412037	0.366195	0.455606	0.409974	0.455128	0.393336	0.351074	0.430343	0.403683	0.445453	0.424955	0.422415	0.457991	0.460288	0.397445	0.366634	0.382689	0.393069	0.415227	0.430181	0.398713	0.439587	0.399811	0.430453	0.414232	0.443121	0.411182	0.469043	0.454412	0.456871	0.464033	0.397459	0.401605	0.370298	0.405965	0.334484	0.395645	0.443439	0.411194	0.350488	0.383984	0.379933	0.374594	0.409219	0.4343
456	0.420683	0.410878	0.448815	0.423062	0.410762	0.370038	0.457907	0.422317	0.464703	0.391743	0.348153	0.436723	0.408449	0.447922	0.429188	0.433898	0.462901	0.473939	0.403641	0.368535	0.385752	0.401379	0.410344	0.428656	0.412358	0.449454	0.402585	0.439543	0.410707	0.443828	0.418482	0.482654	0.455521	0.454074	0.46473	0.40659	0.410773	0.374243	0.415214	0.345486	0.39818	0.444021	0.415602	0.350873	0.384898	0.367876	0.38276	0.414145	0.437406
458	0.432752	0.420026	0.454579	0.430901	0.410038	0.368266	0.459095	0.423788	0.47139	0.400323	0.349122	0.440688	0.41378	0.445053	0.437004	0.435405	0.459697	0.481069	0.403191	0.376353	0.38699	0.409268	0.412197	0.434601	0.419151	0.449028	0.40416	0.449103	0.415623	0.449235	0.419635	0.484901	0.457418	0.464	0.461639	0.407077	0.41337	0.371712	0.419082	0.35023	0.397859	0.444399	0.418673	0.355412	0.39275	0.374231	0.384801	0.415846	0.441802
460	0.427887	0.421861	0.458064	0.437538	0.421665	0.376596	0.458968	0.420173	0.468682	0.402122	0.338286	0.443317	0.426937	0.45168	0.441813	0.440246	0.453477	0.482721	0.398392	0.378936	0.387356	0.417911	0.409923	0.433731	0.418307	0.452325	0.408195	0.449191	0.415938	0.461996	0.428359	0.481003	0.455875	0.473753	0.475679	0.412288	0.419307	0.363859	0.415117	0.355947	0.416328	0.447225	0.420622	0.359725	0.391879	0.386473	0.391354	0.41403	0.443603
462	0.429079	0.419508	0.464247	0.450229	0.412018	0.384098	0.466723	0.426466	0.474911	0.40865	0.336731	0.448012	0.432663	0.450674	0.454824	0.441087	0.451087	0.484907	0.403529	0.378029	0.397597	0.4232	0.402629	0.439811	0.418422	0.454651	0.41404	0.451106	0.417302	0.467322	0.435413	0.478604	0.45399	0.469052	0.477404	0.415747	0.419673	0.359554	0.424712	0.350298	0.42216	0.444527	0.426267	0.363835	0.398244	0.383253	0.395008	0.423588	0.443113
464	0.436748	0.426215	0.461887	0.457127	0.415622	0.393635	0.468377	0.421948	0.473891	0.403522	0.339275	0.448719	0.439901	0.447113	0.459404	0.440983	0.445078	0.484406	0.412956	0.389934	0.398455	0.420473	0.39773	0.452053	0.420228	0.452176	0.410468	0.457692	0.417442	0.473684	0.436747	0.467466	0.454791	0.465047	0.475452	0.412563	0.417199	0.367772	0.435215	0.352891	0.421515	0.444895	0.429891	0.36961	0.39147	0.375821	0.399345	0.430734	0.438497
466	0.431959	0.439832	0.469924	0.456201	0.421503	0.396677	0.473666	0.412403	0.47558	0.406122	0.348262	0.453456	0.449504	0.456835	0.467193	0.443893	0.442791	0.478592	0.41201	0.387812	0.397725	0.42131	0.406813	0.460851	0.425246	0.464317	0.410622	0.460519	0.426393	0.482139	0.441597	0.465514	0.461489	0.472458	0.479844	0.411364	0.411889	0.373879	0.438085	0.355896	0.42282	0.451421	0.437312	0.377041	0.392258	0.3894	0.40074	0.440971	0.445004
468	0.439722	0.447831	0.470697	0.466198	0.43548	0.402635	0.47165	0.419184	0.476938	0.402841	0.356779	0.465875	0.457191	0.467189	0.478203	0.443745	0.45746	0.482076	0.414032	0.390173	0.404933	0.424202	0.415322	0.468384	0.432598	0.466361	0.420778	0.462382	0.424852	0.490508	0.444452	0.482232	0.46768	0.46616	0.483644	0.421886	0.40964	0.380782	0.444136	0.349746	0.422216	0.457367	0.442393	0.382859	0.387891	0.396381	0.409114	0.442856	0.45645
470	0.447323	0.441982	0.477597	0.467243	0.436504	0.402537	0.479408	0.426417	0.490529	0.395157	0.365689	0.468593	0.451583	0.470455	0.475348	0.447639	0.458037	0.493236	0.422919	0.38957	0.403778	0.424558	0.419624	0.472298	0.430037	0.464318	0.427507	0.466013	0.426099	0.489478	0.442965	0.485503	0.468481	0.45541	0.483927	0.419256	0.419636	0.388341	0.456836	0.355463	0.414412	0.459108	0.451024	0.384168	0.40024	0.387389	0.400568	0.450721	0.457644
472	0.454286	0.447719	0.482062	0.460343	0.446004	0.403078	0.480222	0.431947	0.494674	0.399771	0.372137	0.474619	0.45472	0.468959	0.468212	0.453426	0.473982	0.492042	0.427742	0.393674	0.410438	0.423998	0.421358	0.472734	0.436253	0.473418	0.435203	0.47048	0.435426	0.495667	0.446435	0.490591	0.470631	0.465202	0.490226	0.420745	0.422388	0.400353	0.456886	0.363903	0.411472	0.472897	0.456885	0.388236	0.405693	0.399495	0.407859	0.459197	0.465849
474	0.445763	0.446567	0.485193	0.458581	0.447065	0.409764	0.483122	0.436535	0.503428	0.413387	0.37391	0.479486	0.456937	0.476812	0.480254	0.456547	0.483038	0.487926	0.422224	0.390087	0.422322	0.42139	0.428022	0.479071	0.441172	0.475691	0.437171	0.477921	0.44139	0.504725	0.446489	0.500829	0.480026	0.471668	0.496056	0.42854	0.426759	0.402852	0.455858	0.363182	0.416602	0.481883	0.459788	0.383346	0.413431	0.414164	0.408619	0.469226	0.463695
476	0.45156	0.438846	0.483872	0.463187	0.452491	0.422034	0.487627	0.441831	0.507216	0.41225	0.373565	0.484419	0.464182	0.478803	0.484539	0.456198	0.490438	0.48985	0.426961	0.391665	0.428823	0.434715	0.429367	0.477919	0.434032	0.463218	0.442001	0.473495	0.441388	0.507477	0.444145	0.50846	0.486326	0.4678	0.484363	0.441581	0.439853	0.399696	0.461498	0.36782	0.425714	0.490649	0.460524	0.387946	0.415722	0.414916	0.409987	0.483444	0.467937
478	0.460769	0.437703	0.489423	0.456756	0.448839	0.432401	0.488103	0.446515	0.506718	0.409783	0.37628	0.483258	0.462769	0.486062	0.483244	0.468159	0.496457	0.48647	0.434055	0.399525	0.43023	0.449956	0.428186	0.479463	0.43779	0.469613	0.443045	0.475321	0.451732	0.494101	0.445902	0.497254	0.486167	0.469524	0.488127	0.44282	0.447815	0.406393	0.459097	0.380652	0.435745	0.484616	0.467506	0.392719	0.423648	0.412518	0.413653	0.489478	0.46037
480	0.467968	0.445952	0.495422	0.465298	0.442058	0.438956	0.485725	0.4515	0.510745	0.426813	0.377464	0.482473	0.475165	0.485304	0.496425	0.470463	0.500137	0.490207	0.43956	0.410215	0.440168	0.448932	0.435233	0.48596	0.447769	0.486888	0.443696	0.477742	0.462444	0.496275	0.456084	0.506025	0.492695	0.483813	0.493415	0.450072	0.448879	0.408295	0.463475	0.379513	0.441558	0.491086	0.462401	0.396605	0.421165	0.419007	0.423073	0.488262	0.470706
482	0.467901	0.448679	0.501062	0.466255	0.444985	0.441931	0.498906	0.462742	0.524629	0.42874	0.37807	0.480716	0.480191	0.494563	0.506089	0.475016	0.502893	0.496705	0.432368	0.417554	0.445833	0.448375	0.442214	0.488726	0.456577	0.490889	0.446547	0.484117	0.468373	0.509919	0.461422	0.510396	0.502246	0.484646	0.498229	0.459062	0.450161	0.421648	0.467912	0.379659	0.449482	0.488309	0.464625	0.408632	0.422978	0.423595	0.430081	0.495895	0.47509
484	0.478117	0.458301	0.505271	0.478133	0.451208	0.445038	0.502046	0.466282	0.525777	0.429379	0.381824	0.48313	0.491102	0.496562	0.508256	0.482397	0.510254	0.505175	0.438096	0.422064	0.443934	0.464354	0.447897	0.482068	0.461441	0.497379	0.451106	0.491804	0.466703	0.513635	0.467207	0.516119	0.49906	0.490874	0.506382	0.463112	0.455063	0.429145	0.473812	0.381421	0.457862	0.486771	0.469743	0.413179	0.426431	0.418538	0.439233	0.488644	0.485358
486	0.480594	0.465549	0.514133	0.489463	0.455474	0.444094	0.506939	0.473591	0.523808	0.435667	0.387549	0.489453	0.503549	0.501348	0.513492	0.49411	0.505798	0.511894	0.435321	0.43338	0.453099	0.455854	0.457928	0.491185	0.475502	0.518496	0.456061	0.507671	0.466822	0.517716	0.471583	0.516922	0.504068	0.498717	0.524894	0.467411	0.45657	0.439999	0.477675	0.375428	0.456314	0.486072	0.478376	0.412782	0.440302	0.421881	0.439585	0.478011	0.486968
488	0.484942	0.463136	0.521848	0.491678	0.461217	0.439364	0.526811	0.467103	0.530721	0.44889	0.392848	0.49392	0.507505	0.501552	0.519657	0.496186	0.504724	0.519922	0.441136	0.430311	0.46082	0.450599	0.458182	0.490212	0.477426	0.52324	0.455072	0.518636	0.472824	0.537614	0.470386	0.528043	0.504125	0.504507	0.523335	0.474204	0.461075	0.440369	0.488105	0.376668	0.462185	0.495897	0.481213	0.414246	0.437821	0.430866	0.433741	0.485424	0.490676
490	0.489555	0.461856	0.525594	0.495959	0.46804	0.447023	0.52744	0.472038	0.53661	0.45248	0.390515	0.507304	0.506901	0.502917	0.52983	0.50681	0.513361	0.529947	0.442903	0.42475	0.465654	0.452794	0.459655	0.493715	0.478742	0.51947	0.463712	0.523166	0.477792	0.546752	0.476393	0.53482	0.516485	0.503502	0.535506	0.482427	0.461164	0.446396	0.493572	0.390181	0.469955	0.493511	0.48653	0.425888	0.445293	0.435112	0.443037	0.492629	0.491353
492	0.489567	0.461771	0.526703	0.497304	0.474437	0.454703	0.524324	0.468442	0.531495	0.45098	0.404761	0.513114	0.516808	0.507442	0.531624	0.517163	0.521998	0.531319	0.450217	0.418329	0.463711	0.464284	0.462541	0.50156	0.477679	0.524155	0.466607	0.520426	0.477987	0.544137	0.486068	0.528131	0.51828	0.506045	0.537572	0.493292	0.468411	0.433326	0.499471	0.393974	0.476213	0.504905	0.489765	0.423148	0.447622	0.435479	0.435886	0.493742	0.492958
494	0.495579	0.466293	0.520728	0.498772	0.47608	0.453811	0.533392	0.466369	0.529573	0.45118	0.407081	0.51605	0.517551	0.507771	0.533263	0.520056	0.520602	0.534993	0.450251	0.420455	0.466396	0.460717	0.463402	0.506183	0.474617	0.520632	0.475494	0.514528	0.489432	0.549907	0.489058	0.533995	0.517873	0.503088	0.540968	0.499293	0.476839	0.432823	0.497589	0.40235	0.476794	0.509044	0.492209	0.423583	0.456948	0.439986	0.432898	0.502175	0.505382
496	0.496614	0.473993	0.521438	0.4975	0.482545	0.463495	0.535887	0.468124	0.545414	0.453564	0.405518	0.521674	0.515702	0.507659	0.540871	0.516778	0.532638	0.540824	0.451183	0.420214	0.468102	0.469416	0.467344	0.500062	0.474082	0.521963	0.478355	0.504201	0.496007	0.549217	0.497348	0.541295	0.514497	0.509004	0.532447	0.49597	0.480606	0.432496	0.495119	0.407996	0.475447	0.517866	0.497916	0.431324	0.452924	0.452972	0.438035	0.511791	0.510304
498	0.497551	0.487604	0.527062	0.51304	0.487006	0.468863	0.529156	0.475639	0.560027	0.457522	0.402439	0.533186	0.516052	0.515686	0.548799	0.517371	0.532932	0.544719	0.446069	0.4115	0.477968	0.472234	0.472966	0.509934	0.477551	0.527158	0.480365	0.502342	0.496697	0.544789	0.500685	0.549049	0.518891	0.508386	0.5542	0.499767	0.47852	0.432659	0.499064	0.418265	0.476149	0.521237	0.497829	0.435216	0.452802	0.452342	0.448592	0.512035	0.515519
500	0.508028	0.496175	0.526814	0.512877	0.505013	0.466383	0.539504	0.479986	0.561501	0.453533	0.415705	0.542573	0.521642	0.520916	0.541716	0.52249	0.539405	0.544242	0.437003	0.416125	0.483002	0.476212	0.470063	0.519196	0.486128	0.532577	0.480535	0.503479	0.494534	0.546326	0.499837	0.551472	0.519353	0.521418	0.551628	0.506219	0.486693	0.433144	0.501626	0.42442	0.483041	0.529005	0.507598	0.434247	0.454219	0.457867	0.456	0.520463	0.522603
502	0.507097	0.503441	0.531626	0.517918	0.505346	0.470453	0.548038	0.489589	0.570502	0.463161	0.409224	0.55945	0.51829	0.524866	0.546953	0.517849	0.533257	0.555715	0.449275	0.42398	0.486575	0.477648	0.475683	0.521781	0.488101	0.536665	0.48288	0.516704	0.509573	0.542912	0.490719	0.564469	0.519944	0.524533	0.555211	0.502756	0.486056	0.452635	0.508698	0.430909	0.486185	0.525068	0.509439	0.436123	0.458103	0.466601	0.467431	0.525925	0.529182
504	0.520138	0.513068	0.538721	0.523699	0.507232	0.476843	0.552774	0.501392	0.581482	0.475295	0.412974	0.574527	0.523693	0.536262	0.543871	0.526912	0.54204	0.564464	0.450875	0.427415	0.490517	0.47861	0.490155	0.534106	0.501409	0.548603	0.482028	0.525088	0.513397	0.533441	0.490727	0.566453	0.531123	0.530355	0.558123	0.50432	0.489385	0.452173	0.513081	0.429357	0.485583	0.533732	0.515052	0.435983	0.451822	0.472735	0.464416	0.529949	0.531092
506	0.520146	0.509518	0.539271	0.528735	0.509679	0.475989	0.558902	0.503714	0.586865	0.488808	0.415031	0.573677	0.525182	0.545972	0.545491	0.528175	0.545656	0.562155	0.454941	0.426405	0.498367	0.478664	0.497148	0.541377	0.503999	0.543306	0.487891	0.535498	0.514269	0.539505	0.489183	0.567333	0.534073	0.533807	0.571867	0.508341	0.488173	0.454372	0.518063	0.441729	0.494373	0.537761	0.517999	0.439076	0.452833	0.467617	0.473698	0.537077	0.525412
508	0.51824	0.51129	0.541267	0.524675	0.520445	0.48356	0.567914	0.509952	0.590779	0.486816	0.417063	0.568551	0.5332	0.549914	0.546941	0.526907	0.554597	0.569432	0.466004	0.438512	0.500214	0.476818	0.499488	0.552001	0.512107	0.55254	0.498543	0.542613	0.514315	0.552275	0.505678	0.564169	0.547059	0.544135	0.565433	0.508522	0.502979	0.465149	0.520432	0.436684	0.499368	0.545712	0.527244	0.44534	0.45873	0.471666	0.472699	0.541289	0.530878
510	0.523752	0.518834	0.557391	0.535909	0.510894	0.492051	0.571013	0.508734	0.599265	0.494542	0.419791	0.569504	0.539837	0.563429	0.556226	0.522602	0.554409	0.582346	0.480015	0.448026	0.494691	0.480385	0.511789	0.560385	0.513849	0.55884	0.503948	0.553231	0.528886	0.564626	0.510255	0.575428	0.549758	0.546725	0.576185	0.505036	0.511952	0.476433	0.531907	0.433866	0.500213	0.55313	0.531103	0.457735	0.458348	0.479231	0.47089	0.54321	0.532333
512	0.536559	0.523663	0.558691	0.547043	0.517975	0.491533	0.570268	0.510103	0.607186	0.499259	0.425061	0.554854	0.552022	0.561524	0.563239	0.530114	0.558858	0.591181	0.475535	0.448191	0.496488	0.482392	0.510193	0.56312	0.517387	0.560283	0.507783	0.548839	0.517424	0.5702	0.524482	0.580521	0.553364	0.554138	0.579754	0.513942	0.526118	0.467945	0.534567	0.440578	0.498888	0.557195	0.539496	0.454098	0.453854	0.479036	0.470905	0.548477	0.530229
514	0.540843	0.523621	0.564427	0.551448	0.526352	0.489407	0.572069	0.510246	0.607719	0.501899	0.42193	0.550934	0.559376	0.560313	0.577775	0.534921	0.568409	0.609004	0.487894	0.456394	0.501667	0.487617	0.508508	0.568415	0.518318	0.569876	0.514345	0.542515	0.517757	0.588139	0.528183	0.58789	0.56159	0.570705	0.589556	0.520184	0.524993	0.486088	0.543261	0.450172	0.509248	0.560317	0.54396	0.466918	0.467683	0.483419	0.483983	0.551066	0.528063
516	0.536567	0.534863	0.569358	0.552557	0.527764	0.499539	0.572946	0.518814	0.603662	0.50446	0.427833	0.552589	0.564121	0.567349	0.584348	0.550574	0.56817	0.616166	0.487619	0.465377	0.505803	0.497894	0.50983	0.575547	0.522091	0.57783	0.518041	0.539879	0.533108	0.593945	0.537076	0.598775	0.577951	0.589097	0.591599	0.521766	0.532438	0.48706	0.550464	0.45138	0.521239	0.564372	0.547827	0.475614	0.478119	0.485263	0.48842	0.549428	0.547427
518	0.549665	0.539738	0.570849	0.562851	0.527911	0.505797	0.569712	0.524105	0.598445	0.5061	0.434266	0.559049	0.568636	0.567204	0.579159	0.559654	0.576702	0.615056	0.492831	0.471572	0.505994	0.492974	0.525388	0.574858	0.515059	0.577338	0.515179	0.537402	0.539884	0.59575	0.537996	0.604626	0.574315	0.588129	0.601395	0.530048	0.528335	0.483819	0.556583	0.460855	0.517108	0.566774	0.555879	0.477616	0.487693	0.487661	0.496651	0.555802	0.551255
520	0.554605	0.542236	0.56012	0.561328	0.542116	0.502971	0.566754	0.525056	0.590121	0.509406	0.431821	0.556492	0.572686	0.553615	0.583037	0.567182	0.582139	0.599888	0.490343	0.477455	0.504076	0.501065	0.531319	0.567393	0.521131	0.578048	0.513595	0.538155	0.538068	0.582459	0.536272	0.598404	0.57186	0.584991	0.597982	0.531793	0.520608	0.481126	0.550158	0.460824	0.518522	0.561855	0.545834	0.47113	0.498572	0.484275	0.496961	0.555429	0.548912
522	0.554911	0.539465	0.5665	0.560897	0.553072	0.505418	0.577369	0.521819	0.587398	0.506758	0.432988	0.56281	0.568348	0.55775	0.585178	0.579017	0.59793	0.60859	0.501494	0.487312	0.510693	0.511692	0.543353	0.567563	0.526327	0.581883	0.518949	0.550177	0.549583	0.59883	0.549005	0.595644	0.574447	0.586228	0.605228	0.541891	0.518008	0.486814	0.559605	0.459655	0.519423	0.577493	0.546708	0.483689	0.507156	0.496139	0.498074	0.545714	0.558327
524	0.546317	0.542367	0.577599	0.560063	0.554356	0.51785	0.57999	0.523506	0.596705	0.512716	0.438671	0.564892	0.566255	0.56772	0.591009	0.580838	0.598251	0.597277	0.502016	0.489481	0.516459	0.521687	0.545088	0.566082	0.525735	0.584834	0.524269	0.56241	0.556396	0.599871	0.552058	0.588896	0.5767	0.581199	0.611251	0.552826	0.521718	0.480536	0.560626	0.458738	0.523439	0.586136	0.545221	0.486408	0.503197	0.503972	0.497136	0.546697	0.567578
526	0.560079	0.538446	0.585123	0.572165	0.570954	0.517193	0.579326	0.523681	0.604983	0.514645	0.446396	0.583001	0.574038	0.558223	0.591891	0.582761	0.60643	0.605761	0.515304	0.490783	0.522022	0.528934	0.5511	0.56988	0.530765	0.584803	0.530573	0.5652	0.556267	0.602664	0.556552	0.592467	0.579451	0.575978	0.621276	0.567072	0.519498	0.48621	0.565915	0.454525	0.529267	0.592601	0.552205	0.479701	0.499524	0.515748	0.495798	0.553309	0.564911
528	0.559504	0.53423	0.594857	0.582694	0.570563	0.521616	0.583416	0.526952	0.611414	0.524772	0.447168	0.587506	0.579713	0.564482	0.599283	0.594819	0.610454	0.606853	0.519768	0.494008	0.521812	0.546053	0.546894	0.567234	0.538969	0.588674	0.537033	0.578635	0.559177	0.613545	0.553305	0.596544	0.586032	0.589267	0.610175	0.567453	0.519199	0.494545	0.572692	0.458288	0.539254	0.595048	0.554076	0.483377	0.500027	0.524742	0.491158	0.558014	0.569379
530	0.574867	0.537482	0.606568	0.587353	0.569365	0.533384	0.593567	0.531576	0.620118	0.525246	0.455614	0.584256	0.579437	0.574059	0.607916	0.600337	0.61437	0.623894	0.534746	0.491296	0.54085	0.543029	0.545516	0.568947	0.547977	0.594453	0.544908	0.578675	0.571828	0.632015	0.564294	0.603288	0.58263	0.597937	0.61196	0.581844	0.524636	0.508178	0.575532	0.472511	0.541984	0.606897	0.569331	0.488133	0.505086	0.535897	0.501943	0.560481	0.578239
532	0.570207	0.56133	0.624341	0.59359	0.573055	0.541602	0.596193	0.536397	0.629559	0.527992	0.461168	0.594534	0.595508	0.57906	0.619541	0.600923	0.615568	0.622129	0.544909	0.495549	0.539667	0.542224	0.546194	0.572441	0.558742	0.60747	0.555334	0.580913	0.569218	0.630536	0.552354	0.618432	0.598079	0.60797	0.617834	0.576467	0.530977	0.519867	0.573771	0.47493	0.550453	0.603286	0.580334	0.494099	0.511643	0.534028	0.507232	0.569384	0.582381
534	0.577181	0.568148	0.624435	0.596701	0.581867	0.53769	0.599201	0.539786	0.632499	0.518158	0.471781	0.606559	0.596769	0.577656	0.609973	0.604554	0.613157	0.630528	0.543924	0.503055	0.535185	0.537016	0.560193	0.579111	0.561749	0.613405	0.55763	0.587846	0.573889	0.637964	0.556474	0.628547	0.597658	0.610229	0.616866	0.583843	0.533942	0.520138	0.586534	0.479403	0.560866	0.603867	0.584426	0.493257	0.516032	0.534479	0.513332	0.571259	0.573928
536	0.597524	0.569998	0.631503	0.608224	0.574926	0.542521	0.610151	0.548773	0.630031	0.514717	0.464616	0.599658	0.595094	0.590035	0.621536	0.610122	0.623399	0.628586	0.557339	0.502557	0.531482	0.539183	0.552479	0.58174	0.570045	0.630479	0.568914	0.597953	0.576908	0.651898	0.559365	0.633852	0.597762	0.615302	0.620822	0.58171	0.548467	0.520442	0.596286	0.490254	0.560572	0.608731	0.584833	0.506837	0.52608	0.537606	0.521807	0.58258	0.58865
538	0.580422	0.575647	0.626203	0.599227	0.586811	0.53566	0.630364	0.551479	0.636814	0.522814	0.470356	0.608608	0.596332	0.598495	0.623122	0.610204	0.624358	0.64219	0.557107	0.513749	0.537251	0.533932	0.558675	0.58981	0.578893	0.631028	0.569938	0.597361	0.581499	0.651125	0.561312	0.637199	0.593072	0.616179	0.632812	0.585094	0.552907	0.519361	0.595438	0.494284	0.559493	0.623623	0.592307	0.502669	0.534462	0.536372	0.530772	0.590104	0.584798
540	0.596735	0.578347	0.634474	0.598496	0.591098	0.538581	0.632096	0.566079	0.640538	0.521586	0.470607	0.624875	0.607014	0.602116	0.629834	0.613005	0.626953	0.642326	0.557309	0.521509	0.53719	0.543037	0.561593	0.597661	0.573869	0.639004	0.579711	0.609446	0.577089	0.659694	0.556657	0.644932	0.61156	0.620014	0.641444	0.587019	0.565019	0.504458	0.605922	0.486862	0.568077	0.631876	0.600987	0.508232	0.534558	0.532987	0.525457	0.610218	0.588941
542	0.584148	0.571881	0.624821	0.601817	0.590144	0.54307	0.63801	0.572419	0.643403	0.537115	0.47577	0.632586	0.599129	0.614115	0.619753	0.61521	0.62451	0.645863	0.550176	0.517704	0.537262	0.553188	0.564619	0.613512	0.584385	0.636356	0.573785	0.615555	0.600807	0.665428	0.563984	0.644019	0.606463	0.628667	0.643767	0.592399	0.566527	0.508244	0.605192	0.487156	0.566932	0.63553	0.59832	0.520398	0.539846	0.530493	0.521581	0.624321	0.590283
544	0.596658	0.571518	0.628207	0.608341	0.596022	0.548174	0.655393	0.57463	0.650616	0.534654	0.472707	0.628984	0.604278	0.619628	0.628967	0.618838	0.639374	0.648165	0.552867	0.515069	0.54847	0.564318	0.562847	0.616214	0.589655	0.640274	0.589086	0.616396	0.597354	0.664032	0.569694	0.64914	0.602375	0.639754	0.648065	0.595581	0.568484	0.518797	0.608228	0.487384	0.56796	0.64854	0.612758	0.529524	0.544717	0.532312	0.528782	0.638371	0.598785
546	0.601733	0.583224	0.635366	0.600263	0.593995	0.554897	0.656525	0.57064	0.66452	0.536964	0.477789	0.635093	0.608703	0.622184	0.628455	0.6091	0.636852	0.662959	0.543451	0.522549	0.550461	0.559775	0.562515	0.615822	0.592046	0.634437	0.577326	0.615483	0.613538	0.656807	0.568761	0.645884	0.602073	0.640013	0.643825	0.600535	0.572878	0.533895	0.610995	0.493106	0.560997	0.643443	0.621259	0.532391	0.554614	0.533686	0.535806	0.638105	0.5957
548	0.604493	0.596281	0.652734	0.624374	0.595511	0.568322	0.658304	0.575591	0.671791	0.533384	0.486009	0.639153	0.617656	0.624554	0.648148	0.615665	0.64883	0.667716	0.554952	0.5233	0.560555	0.572407	0.568345	0.630889	0.604297	0.648017	0.5901	0.624128	0.617407	0.656561	0.58392	0.653653	0.613391	0.642453	0.651797	0.614602	0.588185	0.53923	0.613618	0.496368	0.578827	0.648859	0.62352	0.542204	0.549898	0.541595	0.544851	0.647936	0.624492
550	0.608979	0.60653	0.654316	0.631682	0.593878	0.555392	0.661486	0.573862	0.686669	0.545849	0.488274	0.63873	0.616615	0.634461	0.648255	0.618629	0.647831	0.674471	0.557045	0.526964	0.56399	0.571672	0.577802	0.639322	0.614413	0.654264	0.582749	0.622341	0.615931	0.649187	0.604931	0.646213	0.618727	0.645825	0.654926	0.61709	0.58647	0.557637	0.613476	0.501051	0.576369	0.65504	0.629745	0.540886	0.550326	0.549084	0.550758	0.646471	0.630778
552	0.63068	0.609462	0.658946	0.640705	0.601727	0.563976	0.661058	0.592072	0.692099	0.543447	0.492987	0.645993	0.625182	0.645869	0.652428	0.625015	0.656746	0.676415	0.566366	0.533631	0.568968	0.566323	0.589869	0.627996	0.610171	0.6704	0.591264	0.62851	0.605841	0.656613	0.619252	0.663453	0.624881	0.639589	0.655976	0.621383	0.586549	0.556843	0.620258	0.507127	0.588894	0.659774	0.6473	0.534389	0.552104	0.554144	0.562539	0.645864	0.638319
554	0.615564	0.625919	0.666166	0.639601	0.600507	0.574244	0.663207	0.607367	0.693602	0.560256	0.501966	0.651019	0.64151	0.654849	0.664617	0.628976	0.660399	0.677712	0.574	0.535147	0.566755	0.570484	0.591879	0.643768	0.622397	0.672159	0.587685	0.638825	0.606939	0.666061	0.632146	0.677643	0.641383	0.643645	0.663521	0.621353	0.594943	0.555874	0.630566	0.514152	0.587754	0.65767	0.649234	0.537552	0.549686	0.558824	0.562329	0.64795	0.63719
556	0.626498	0.626343	0.669137	0.650003	0.612631	0.575787	0.678845	0.6277	0.699481	0.570704	0.517058	0.662996	0.654251	0.655895	0.660029	0.642651	0.682012	0.672268	0.591832	0.548138	0.571705	0.585704	0.606778	0.65583	0.626703	0.67697	0.603135	0.652697	0.597002	0.671228	0.636335	0.685756	0.657381	0.649714	0.67912	0.629775	0.595806	0.548608	0.640637	0.513427	0.606661	0.674611	0.657611	0.532317	0.552306	0.556587	0.563135	0.652634	0.637875
558	0.633605	0.624622	0.674688	0.638825	0.60976	0.593239	0.675481	0.638594	0.696938	0.581421	0.519662	0.662431	0.652767	0.654773	0.661793	0.645704	0.675882	0.677829	0.589163	0.552544	0.573961	0.583777	0.610702	0.655705	0.627955	0.677121	0.598658	0.645223	0.612881	0.681929	0.636029	0.692833	0.655527	0.660871	0.682376	0.636473	0.596606	0.55509	0.653719	0.515277	0.602756	0.67401	0.661609	0.53403	0.564362	0.56555	0.573616	0.648559	0.626657
560	0.638331	0.630544	0.675736	0.644589	0.622494	0.616095	0.678653	0.634314	0.688733	0.587766	0.52463	0.660942	0.65733	0.663029	0.665403	0.654409	0.682113	0.675089	0.6034	0.554257	0.577916	0.589548	0.610603	0.646442	0.626215	0.68034	0.615321	0.654289	0.623143	0.693244	0.628964	0.708732	0.661857	0.668735	0.691578	0.638028	0.60194	0.554968	0.658093	0.517509	0.612772	0.672281	0.658321	0.546635	0.569889	0.5657	0.585311	0.659808	0.625142
562	0.642458	0.641533	0.682805	0.641963	0.625928	0.616753	0.670332	0.629956	0.696532	0.591185	0.52019	0.664253	0.662719	0.65106	0.673369	0.658759	0.68272	0.676324	0.612997	0.55672	0.601961	0.598129	0.601097	0.656871	0.626993	0.671239	0.618195	0.645546	0.634064	0.6951	0.618657	0.704122	0.668624	0.685449	0.694795	0.640308	0.614551	0.550742	0.670617	0.520541	0.610391	0.668813	0.659273	0.545812	0.578777	0.572806	0.591436	0.665427	0.626064
564	0.642993	0.636435	0.686793	0.657174	0.643435	0.625598	0.684014	0.624094	0.708213	0.595822	0.518799	0.670792	0.668005	0.657193	0.681456	0.667563	0.685949	0.688734	0.616154	0.567684	0.607986	0.594491	0.610629	0.660099	0.628951	0.68125	0.625284	0.645828	0.648109	0.708567	0.618557	0.705682	0.667822	0.695605	0.696153	0.650779	0.624468	0.557948	0.67428	0.529286	0.614367	0.68089	0.668982	0.554972	0.595769	0.582217	0.595663	0.673697	0.63579
566	0.648015	0.639612	0.683161	0.663948	0.646613	0.625607	0.688955	0.610282	0.711951	0.602103	0.52074	0.665424	0.670082	0.673348	0.700562	0.670795	0.67395	0.69848	0.608141	0.567697	0.61253	0.589645	0.618145	0.665892	0.633561	0.696827	0.625475	0.652243	0.652936	0.716256	0.625368	0.707223	0.663389	0.703312	0.693175	0.659774	0.632993	0.571886	0.672856	0.527531	0.607876	0.678905	0.662217	0.570464	0.59072	0.593133	0.590564	0.676809	0.626634
568	0.669196	0.649673	0.680154	0.662371	0.652835	0.620038	0.696434	0.61126	0.721494	0.600016	0.51571	0.663262	0.681315	0.677935	0.695534	0.675789	0.680825	0.693349	0.616406	0.569759	0.610491	0.60222	0.625579	0.673053	0.627193	0.698474	0.639156	0.659657	0.644313	0.717216	0.632994	0.705772	0.672827	0.697212	0.682219	0.655163	0.629549	0.567865	0.667845	0.536317	0.614199	0.678355	0.660046	0.573592	0.588169	0.582431	0.592163	0.676286	0.624203
570	0.659921	0.652892	0.675907	0.664786	0.650571	0.626283	0.710892	0.618617	0.732823	0.596402	0.519697	0.670708	0.689873	0.675744	0.693809	0.687513	0.692392	0.698754	0.610096	0.577352	0.614029	0.606463	0.627946	0.687404	0.629758	0.693643	0.645665	0.665748	0.643304	0.712569	0.64513	0.709243	0.675337	0.703144	0.686339	0.668897	0.633735	0.571517	0.662637	0.539834	0.618222	0.683837	0.67332	0.576667	0.590813	0.582297	0.591321	0.672721	0.627049
572	0.657366	0.662152	0.681094	0.669174	0.65048	0.632413	0.729025	0.617867	0.728541	0.605203	0.534069	0.677877	0.698379	0.67426	0.703443	0.694122	0.702872	0.708924	0.599177	0.585381	0.601502	0.606034	0.641909	0.687823	0.633395	0.699824	0.653985	0.676343	0.641867	0.709326	0.652419	0.704618	0.671865	0.702211	0.69004	0.67301	0.630103	0.572029	0.661646	0.549389	0.631344	0.688794	0.676811	0.584436	0.593009	0.578503	0.583778	0.676541	0.629509
574	0.662792	0.664306	0.684949	0.666017	0.638885	0.624171	0.722271	0.623557	0.734527	0.604121	0.530641	0.681198	0.694007	0.669809	0.6938	0.693777	0.702334	0.712394	0.601449	0.582631	0.615364	0.618323	0.63677	0.694879	0.62777	0.69687	0.65578	0.678446	0.639342	0.702471	0.65329	0.694272	0.670412	0.691572	0.688372	0.67029	0.628929	0.57043	0.66358	0.556863	0.644945	0.685686	0.682597	0.588343	0.589128	0.573576	0.585072	0.675015	0.636567
576	0.666438	0.673991	0.700457	0.674565	0.63959	0.634115	0.7158	0.632791	0.74364	0.60291	0.525076	0.693398	0.692591	0.663999	0.690078	0.706564	0.708927	0.717348	0.596699	0.590109	0.624078	0.631902	0.638457	0.705031	0.628838	0.697524	0.665037	0.677598	0.653362	0.701513	0.652965	0.702252	0.68009	0.70042	0.702692	0.668617	0.627874	0.575034	0.658218	0.560706	0.657615	0.695964	0.702048	0.592237	0.599953	0.577822	0.598815	0.677343	0.653534
578	0.665061	0.673883	0.70298	0.682225	0.642227	0.634733	0.717807	0.643235	0.748204	0.611126	0.532907	0.71006	0.693804	0.678052	0.698938	0.718161	0.723772	0.729651	0.603963	0.589868	0.62748	0.648556	0.64847	0.710757	0.639701	0.698884	0.666032	0.682257	0.661191	0.708468	0.65746	0.710935	0.695143	0.708035	0.72362	0.671512	0.641601	0.587677	0.666049	0.565292	0.665155	0.703822	0.706194	0.596509	0.6081	0.590001	0.595025	0.687292	0.661266
580	0.690314	0.684559	0.726892	0.691908	0.656159	0.63743	0.729852	0.647399	0.758863	0.622406	0.54054	0.723457	0.698452	0.689543	0.715498	0.72493	0.726198	0.737822	0.612483	0.591416	0.638592	0.657842	0.672141	0.724903	0.652441	0.716643	0.673023	0.681508	0.671139	0.722523	0.658927	0.717662	0.698956	0.703342	0.727509	0.670769	0.64339	0.593005	0.678178	0.575024	0.66767	0.720385	0.70154	0.598462	0.613819	0.602043	0.60384	0.702248	0.664541
582	0.693298	0.679797	0.733477	0.707473	0.675425	0.648395	0.743773	0.658108	0.775257	0.620416	0.540653	0.731208	0.698397	0.709861	0.712144	0.721475	0.730099	0.740597	0.632926	0.605505	0.652741	0.665711	0.672883	0.741443	0.666004	0.72504	0.676546	0.702993	0.673366	0.736439	0.659526	0.731109	0.711245	0.704813	0.742821	0.686952	0.659484	0.608373	0.68343	0.578546	0.672972	0.731266	0.711205	0.60385	0.620578	0.615904	0.623756	0.714689	0.670642
584	0.705098	0.693195	0.738662	0.716221	0.687715	0.661514	0.747103	0.667099	0.778327	0.625891	0.550158	0.743151	0.710546	0.724713	0.729084	0.725152	0.733726	0.740624	0.638512	0.612062	0.655417	0.666862	0.67669	0.738057	0.67037	0.729847	0.686215	0.707666	0.681744	0.741859	0.663339	0.741202	0.728078	0.713957	0.75635	0.688747	0.663218	0.613688	0.684583	0.571545	0.672974	0.739842	0.696583	0.602962	0.626277	0.622501	0.630095	0.718606	0.682543
586	0.707539	0.698445	0.73104	0.724269	0.695433	0.658604	0.757502	0.676578	0.783822	0.631727	0.549826	0.744379	0.717854	0.735808	0.738444	0.723191	0.736022	0.747027	0.654347	0.614129	0.654419	0.661933	0.686412	0.736922	0.674164	0.744381	0.69017	0.715097	0.688385	0.757038	0.674447	0.749273	0.727167	0.718247	0.752478	0.694572	0.668222	0.618805	0.694785	0.582017	0.670119	0.747568	0.695025	0.605711	0.635111	0.61629	0.630648	0.726673	0.687836
588	0.697744	0.69793	0.738835	0.732989	0.702844	0.662988	0.764083	0.671118	0.786224	0.638118	0.549281	0.745654	0.722015	0.737185	0.737037	0.717383	0.73341	0.749182	0.648126	0.611459	0.658962	0.639766	0.678086	0.728047	0.676029	0.750087	0.693798	0.717097	0.68748	0.757524	0.669816	0.763371	0.72259	0.725593	0.743703	0.69342	0.669804	0.619563	0.699304	0.572816	0.653655	0.753296	0.691701	0.610317	0.634202	0.625413	0.637018	0.737576	0.692574
590	0.715198	0.686028	0.730316	0.734501	0.696185	0.655547	0.761042	0.683764	0.78588	0.635483	0.547151	0.744586	0.729966	0.735258	0.72826	0.702832	0.735627	0.741458	0.645038	0.610125	0.654117	0.642153	0.662202	0.710664	0.67516	0.742556	0.681259	0.716846	0.690269	0.757301	0.658292	0.762474	0.721453	0.728273	0.750182	0.696754	0.668552	0.624948	0.698642	0.571507	0.645758	0.743339	0.690598	0.612491	0.640076	0.62434	0.636254	0.717073	0.697798
592	0.698923	0.691656	0.734968	0.736408	0.688577	0.644447	0.767044	0.693351	0.790236	0.646988	0.547494	0.727409	0.737749	0.752187	0.747139	0.714654	0.753698	0.744237	0.644341	0.607435	0.643555	0.643782	0.678207	0.714427	0.677663	0.753933	0.683946	0.710687	0.695161	0.758127	0.671625	0.767187	0.725172	0.729879	0.742155	0.696063	0.66885	0.636735	0.711411	0.57366	0.650049	0.756348	0.676509	0.617447	0.643244	0.635709	0.637391	0.72516	0.696175
594	0.697546	0.691731	0.745953	0.754009	0.691638	0.64536	0.784852	0.703376	0.796817	0.653741	0.550952	0.728053	0.738654	0.752468	0.747096	0.724756	0.774069	0.744438	0.656126	0.614515	0.639698	0.650269	0.689117	0.720977	0.68707	0.767751	0.682527	0.722028	0.707442	0.763974	0.680208	0.772004	0.723691	0.74156	0.740337	0.703043	0.671752	0.643162	0.720422	0.58535	0.655629	0.76432	0.691323	0.626846	0.64649	0.641123	0.644593	0.732969	0.697049
596	0.724982	0.697479	0.756387	0.752757	0.699699	0.656625	0.791134	0.714505	0.788617	0.659856	0.566221	0.730852	0.74403	0.756207	0.748103	0.732631	0.791179	0.748494	0.654103	0.609709	0.643242	0.651534	0.691312	0.720129	0.699148	0.76175	0.675766	0.71849	0.7108	0.764193	0.684317	0.770562	0.725368	0.744041	0.745167	0.708865	0.676049	0.650473	0.720861	0.586253	0.661907	0.764267	0.696368	0.620867	0.639475	0.655734	0.648031	0.734448	0.700806
598	0.727107	0.714836	0.757562	0.755676	0.705752	0.660161	0.79092	0.719527	0.791666	0.658613	0.571933	0.735856	0.749096	0.765472	0.758023	0.737698	0.796721	0.754314	0.671542	0.62258	0.653925	0.672124	0.706241	0.734278	0.700052	0.772983	0.682867	0.731687	0.713258	0.779298	0.704358	0.772084	0.728883	0.741154	0.763594	0.717651	0.675631	0.653462	0.732588	0.591846	0.683948	0.775438	0.714246	0.619868	0.647849	0.663362	0.654813	0.73011	0.696715
600	0.726147	0.722962	0.763439	0.762523	0.715977	0.671248	0.796084	0.719052	0.801678	0.672348	0.579908	0.74327	0.749704	0.776694	0.760876	0.747628	0.81428	0.782462	0.679185	0.636712	0.667003	0.673113	0.72057	0.746079	0.701732	0.783858	0.693781	0.749156	0.718923	0.786709	0.727188	0.788777	0.736046	0.763705	0.757336	0.71646	0.683668	0.665211	0.754597	0.604821	0.703397	0.783588	0.72968	0.62355	0.647392	0.670191	0.661002	0.743838	0.718269
602	0.732964	0.731423	0.775655	0.754798	0.731507	0.683431	0.785558	0.70329	0.807573	0.667712	0.588845	0.759861	0.758271	0.757178	0.753217	0.751196	0.793826	0.783535	0.680523	0.632648	0.671688	0.678213	0.708793	0.740144	0.696147	0.789369	0.70411	0.745455	0.722125	0.80081	0.725731	0.797085	0.734519	0.771296	0.770438	0.709668	0.674583	0.658015	0.7431	0.605738	0.701787	0.782512	0.731094	0.628442	0.6441	0.660532	0.661409	0.733297	0.722035
604	0.736219	0.738882	0.783291	0.744957	0.741283	0.699197	0.774412	0.707259	0.81338	0.665807	0.604008	0.765766	0.767097	0.767588	0.757373	0.759904	0.787502	0.797977	0.676011	0.625689	0.680247	0.677355	0.708536	0.736782	0.699136	0.786587	0.705652	0.739385	0.737028	0.804389	0.729679	0.805104	0.742602	0.784343	0.77844	0.712912	0.686999	0.659267	0.746949	0.606618	0.702212	0.777061	0.74369	0.62897	0.650619	0.655641	0.663682	0.736151	0.732872
606	0.723559	0.737654	0.784384	0.740344	0.747075	0.693668	0.77334	0.708298	0.814018	0.675	0.601417	0.776845	0.775648	0.773619	0.767656	0.766585	0.78558	0.804498	0.697608	0.639998	0.691412	0.69536	0.705199	0.752018	0.700696	0.799229	0.722545	0.751714	0.743096	0.818011	0.741488	0.815814	0.743455	0.781286	0.782029	0.714321	0.69928	0.664077	0.754867	0.613251	0.703177	0.782468	0.74419	0.638853	0.66023	0.65864	0.675719	0.738938	0.735824
608	0.747924	0.736303	0.792633	0.745519	0.744131	0.710367	0.780296	0.718272	0.824081	0.689111	0.611761	0.786069	0.786853	0.772188	0.780407	0.769902	0.790809	0.80932	0.695685	0.648012	0.697768	0.699162	0.706009	0.757487	0.714669	0.799014	0.734155	0.75633	0.755676	0.811931	0.733202	0.812623	0.755517	0.78684	0.794087	0.725412	0.710896	0.661474	0.754653	0.62264	0.718671	0.772086	0.759097	0.653696	0.665519	0.653332	0.676924	0.744947	0.750286
610	0.75807	0.741634	0.799875	0.748902	0.752122	0.720735	0.790453	0.723481	0.827747	0.691886	0.611694	0.785195	0.786654	0.77384	0.782272	0.777664	0.780312	0.802703	0.703795	0.654141	0.700684	0.701127	0.698183	0.774895	0.72501	0.800592	0.73604	0.757899	0.755043	0.817328	0.725638	0.808071	0.752306	0.781164	0.800778	0.735447	0.710604	0.656735	0.743102	0.623834	0.715436	0.776173	0.757688	0.655811	0.665937	0.659755	0.676158	0.744927	0.739901
612	0.754875	0.735843	0.800282	0.756426	0.733438	0.717996	0.785334	0.741748	0.824873	0.697465	0.620586	0.789611	0.769563	0.78	0.796564	0.787753	0.796264	0.813499	0.70893	0.668075	0.714802	0.699361	0.705036	0.781149	0.734439	0.793789	0.737574	0.76647	0.761355	0.811937	0.727585	0.81257	0.760743	0.784969	0.808037	0.749351	0.72925	0.655769	0.747184	0.619232	0.725539	0.782764	0.765469	0.650317	0.663838	0.656988	0.68388	0.756108	0.746649
614	0.755242	0.746368	0.792693	0.77137	0.740086	0.720447	0.788991	0.742071	0.817775	0.704279	0.614055	0.798934	0.76909	0.782617	0.805321	0.778034	0.795565	0.80779	0.716959	0.687185	0.715544	0.700502	0.706684	0.787984	0.739824	0.79503	0.745996	0.782269	0.750606	0.811407	0.734462	0.824748	0.763257	0.768746	0.812791	0.753754	0.723154	0.663965	0.74373	0.626812	0.722624	0.79717	0.763513	0.658407	0.663651	0.665423	0.695306	0.764149	0.743679
616	0.752484	0.762303	0.810529	0.781694	0.747654	0.730922	0.795186	0.740407	0.827476	0.698001	0.624172	0.787358	0.77418	0.786415	0.81011	0.771795	0.794899	0.810628	0.706859	0.683549	0.711431	0.691657	0.71159	0.78946	0.7384	0.786447	0.743847	0.774849	0.753845	0.805292	0.725073	0.817487	0.765989	0.775196	0.81305	0.76549	0.718316	0.650971	0.754993	0.629222	0.728899	0.803083	0.761062	0.660478	0.656313	0.65921	0.692001	0.775872	0.750145
618	0.76981	0.764692	0.814252	0.784277	0.753968	0.721367	0.803558	0.738854	0.835899	0.696831	0.625894	0.78742	0.774634	0.791663	0.798157	0.776371	0.796584	0.818697	0.703774	0.682371	0.715897	0.69411	0.713228	0.78834	0.734932	0.800412	0.737017	0.775989	0.770609	0.813021	0.731211	0.818006	0.762888	0.780644	0.806809	0.753077	0.725159	0.658718	0.762666	0.632434	0.718808	0.816684	0.758707	0.65691	0.651181	0.668373	0.702375	0.777479	0.751093
620	0.76494	0.773691	0.815754	0.784675	0.754642	0.718277	0.803073	0.748397	0.831056	0.693757	0.634365	0.795077	0.774033	0.800636	0.818487	0.783988	0.803794	0.822379	0.708095	0.680557	0.70668	0.704709	0.721552	0.789801	0.733805	0.813112	0.741882	0.774447	0.785155	0.823455	0.747928	0.820111	0.775705	0.778692	0.81664	0.75363	0.74132	0.661146	0.774163	0.634143	0.719696	0.827219	0.772393	0.66356	0.661922	0.66291	0.711627	0.791404	0.759082
622	0.774116	0.770282	0.815829	0.783698	0.7736	0.722691	0.815641	0.747779	0.832291	0.688165	0.631434	0.800083	0.785629	0.809095	0.812794	0.779894	0.80305	0.831075	0.710833	0.677091	0.702492	0.716726	0.731925	0.793928	0.741586	0.825519	0.746276	0.775395	0.788186	0.82733	0.751295	0.813901	0.785354	0.790893	0.80898	0.750109	0.747328	0.67885	0.787843	0.650078	0.714633	0.834064	0.782892	0.68197	0.670201	0.673866	0.70508	0.797613	0.760856
624	0.77855	0.768758	0.82982	0.781035	0.773771	0.72692	0.826498	0.756396	0.841362	0.69071	0.641048	0.807343	0.781701	0.804473	0.817829	0.790537	0.821039	0.857777	0.716309	0.672895	0.719714	0.730647	0.740991	0.806208	0.752086	0.836343	0.755324	0.765014	0.799047	0.831493	0.760969	0.822678	0.793863	0.798646	0.806317	0.747448	0.747421	0.679239	0.799079	0.656373	0.717603	0.83441	0.788273	0.681948	0.677609	0.686016	0.692915	0.793091	0.76231
626	0.771356	0.76306	0.826476	0.798912	0.767331	0.731464	0.825028	0.758668	0.852138	0.70473	0.639611	0.817309	0.7842	0.802655	0.817809	0.802991	0.826227	0.859024	0.717273	0.679309	0.736608	0.744728	0.753634	0.802962	0.761403	0.842253	0.757886	0.791208	0.805375	0.83077	0.778001	0.837329	0.801849	0.796406	0.814909	0.743003	0.754396	0.694185	0.795247	0.662057	0.719208	0.828021	0.805853	0.690949	0.700523	0.700577	0.701852	0.795907	0.768781
628	0.795138	0.768161	0.827412	0.793466	0.791498	0.734905	0.829205	0.760158	0.851211	0.695809	0.642732	0.820473	0.78342	0.809313	0.817505	0.815771	0.825114	0.861142	0.729101	0.674342	0.730862	0.741455	0.754926	0.804666	0.769136	0.853015	0.765953	0.80637	0.793834	0.826763	0.784726	0.850698	0.811037	0.80466	0.815973	0.769615	0.75118	0.70287	0.794855	0.661646	0.724385	0.821629	0.807844	0.707949	0.715106	0.694589	0.699351	0.80329	0.784678
630	0.805512	0.782142	0.839614	0.804024	0.798606	0.748869	0.830706	0.752576	0.8609	0.712939	0.657325	0.841172	0.807677	0.807446	0.812737	0.82143	0.830907	0.869539	0.729872	0.683376	0.747788	0.752919	0.758808	0.804384	0.778244	0.855522	0.776686	0.830484	0.792589	0.822858	0.791258	0.857783	0.812087	0.81756	0.819629	0.79102	0.757378	0.712703	0.800497	0.66468	0.734093	0.82917	0.809231	0.719949	0.715058	0.718008	0.707139	0.803834	0.797867
632	0.79616	0.792184	0.849255	0.813501	0.803132	0.763926	0.834457	0.755473	0.88039	0.728024	0.655156	0.838999	0.820671	0.810589	0.819576	0.8297	0.835585	0.878992	0.736052	0.698802	0.757328	0.758657	0.76164	0.812593	0.776483	0.864398	0.780933	0.833289	0.798581	0.818774	0.789705	0.858083	0.80608	0.816696	0.82338	0.812631	0.74499	0.699569	0.797294	0.661923	0.75062	0.829552	0.808644	0.71372	0.72351	0.722651	0.723329	0.799531	0.800915
634	0.819772	0.790786	0.842751	0.806199	0.795701	0.761532	0.838967	0.752433	0.883713	0.743228	0.654512	0.839063	0.833725	0.811705	0.813031	0.837944	0.82781	0.866036	0.732088	0.692801	0.743088	0.763519	0.763917	0.805114	0.772965	0.856501	0.776651	0.847991	0.790621	0.82653	0.784248	0.838049	0.798526	0.812214	0.830599	0.821906	0.754917	0.717881	0.78945	0.644135	0.750857	0.817011	0.805351	0.709426	0.730089	0.717948	0.740247	0.812412	0.810812
636	0.798733	0.795498	0.850238	0.795474	0.798075	0.773512	0.844557	0.766296	0.875924	0.738178	0.661747	0.8421	0.830968	0.815549	0.822901	0.847675	0.837875	0.855006	0.74393	0.689655	0.750383	0.758829	0.775576	0.80565	0.779754	0.863428	0.781782	0.837996	0.782495	0.843371	0.77701	0.833022	0.802728	0.827998	0.826659	0.833076	0.764262	0.717552	0.796481	0.647213	0.761239	0.822914	0.791775	0.718747	0.713562	0.711774	0.735415	0.80939	0.815312
638	0.796183	0.800636	0.855257	0.812653	0.792789	0.781779	0.850921	0.786497	0.877175	0.747611	0.665689	0.842877	0.840792	0.826697	0.841871	0.843943	0.841399	0.868509	0.75533	0.705356	0.759624	0.763136	0.783603	0.813579	0.785019	0.860637	0.784261	0.830004	0.780973	0.851791	0.792145	0.828509	0.797338	0.836675	0.849425	0.823985	0.771109	0.714579	0.803044	0.644791	0.766302	0.841172	0.794106	0.709266	0.713002	0.714028	0.73449	0.825103	0.81643
640	0.808509	0.789142	0.856818	0.81958	0.794471	0.767412	0.862118	0.796262	0.877897	0.745161	0.659913	0.846766	0.839842	0.835201	0.849927	0.846392	0.851037	0.866395	0.765122	0.705077	0.769293	0.763036	0.786592	0.819002	0.789333	0.856496	0.793341	0.818968	0.785997	0.850745	0.790429	0.845673	0.803958	0.832609	0.861149	0.814726	0.763817	0.70965	0.799286	0.650743	0.772336	0.837474	0.79823	0.699278	0.717127	0.705898	0.736553	0.824589	0.816132
642	0.823375	0.808689	0.858427	0.829465	0.800424	0.775585	0.874094	0.802259	0.881056	0.746218	0.671986	0.862151	0.84036	0.843861	0.872148	0.854299	0.859528	0.859398	0.768417	0.697213	0.779388	0.761348	0.785551	0.827393	0.797399	0.85733	0.799918	0.824362	0.795151	0.874833	0.819262	0.859237	0.813675	0.840844	0.880063	0.814801	0.788264	0.729975	0.810905	0.656159	0.768697	0.831218	0.806778	0.712415	0.723923	0.711676	0.748702	0.834423	0.817422
644	0.827718	0.811209	0.859732	0.848855	0.807626	0.777507	0.867428	0.809894	0.895404	0.745053	0.682604	0.86145	0.844266	0.854772	0.881523	0.848722	0.8707	0.859951	0.778412	0.712032	0.792489	0.757354	0.785675	0.828514	0.805996	0.869679	0.812834	0.828326	0.808125	0.876263	0.819133	0.882133	0.819499	0.853309	0.891366	0.827123	0.796634	0.713799	0.819247	0.670182	0.781081	0.837785	0.807888	0.716448	0.722555	0.717782	0.738327	0.835832	0.824292
646	0.838954	0.807356	0.863636	0.852845	0.824398	0.777668	0.874381	0.817513	0.91423	0.752046	0.681727	0.868432	0.845448	0.861242	0.886354	0.844317	0.874783	0.876496	0.77996	0.721136	0.784023	0.765222	0.781394	0.825796	0.813072	0.876188	0.816601	0.834768	0.813317	0.878542	0.824431	0.895501	0.829021	0.861298	0.896381	0.829383	0.793637	0.717214	0.827127	0.674519	0.787579	0.846671	0.82382	0.716329	0.744639	0.734241	0.743032	0.835824	0.826825
648	0.819801	0.813429	0.871859	0.848465	0.822457	0.780613	0.878079	0.813115	0.907394	0.758317	0.677641	0.872364	0.834676	0.84464	0.886737	0.854145	0.877547	0.875486	0.776867	0.722389	0.782298	0.77624	0.788863	0.833632	0.810186	0.87657	0.81996	0.838758	0.817255	0.877108	0.816665	0.896332	0.836547	0.853348	0.88888	0.848649	0.801571	0.729598	0.834022	0.688535	0.791832	0.837192	0.827586	0.733054	0.75365	0.742754	0.753832	0.825565	0.821579
650	0.830886	0.823166	0.881505	0.855629	0.832724	0.789543	0.87951	0.816756	0.909648	0.758569	0.674303	0.859037	0.830178	0.848694	0.902771	0.854833	0.885533	0.89346	0.782843	0.720214	0.785314	0.793834	0.803741	0.834007	0.810203	0.890832	0.827016	0.837601	0.824547	0.88958	0.817086	0.887522	0.837081	0.862247	0.883184	0.858693	0.818273	0.733742	0.857915	0.691416	0.797215	0.842322	0.828517	0.747311	0.768903	0.754205	0.76546	0.831275	0.821075
652	0.834079	0.815483	0.878732	0.860385	0.831483	0.791184	0.876236	0.822484	0.912213	0.771145	0.673532	0.864221	0.831031	0.855217	0.896783	0.850896	0.885772	0.903479	0.799002	0.721104	0.777997	0.7975	0.821769	0.836567	0.81372	0.894696	0.826645	0.841014	0.829623	0.888544	0.81165	0.899704	0.836118	0.863201	0.881138	0.861178	0.826945	0.725999	0.868306	0.703299	0.802712	0.861299	0.827736	0.753408	0.777928	0.759475	0.7644	0.836147	0.83444
654	0.852983	0.829277	0.903728	0.860439	0.838332	0.794914	0.890421	0.82338	0.899017	0.77646	0.669883	0.853319	0.837421	0.86308	0.902894	0.864625	0.880588	0.914379	0.801441	0.723127	0.782781	0.79893	0.829432	0.852799	0.817799	0.911268	0.822722	0.85133	0.837534	0.897718	0.834138	0.89739	0.845009	0.871466	0.883055	0.86038	0.828645	0.733556	0.881014	0.718833	0.810073	0.878397	0.847423	0.766065	0.78128	0.775039	0.774699	0.845715	0.826983
656	0.853311	0.839799	0.901534	0.861857	0.837586	0.795585	0.889194	0.810071	0.900455	0.777268	0.685391	0.868638	0.841542	0.863159	0.906324	0.874756	0.880874	0.91808	0.814349	0.721737	0.777842	0.798654	0.838317	0.868837	0.814231	0.917696	0.829611	0.867304	0.846772	0.903506	0.849802	0.886269	0.846105	0.871619	0.883888	0.863607	0.835363	0.747434	0.876026	0.713857	0.806474	0.877574	0.846931	0.778648	0.777032	0.788533	0.790503	0.856722	0.835599
658	0.854576	0.849521	0.913885	0.875472	0.838879	0.804613	0.888133	0.809445	0.930003	0.788965	0.692967	0.880727	0.859689	0.876268	0.913192	0.873789	0.89791	0.919564	0.816853	0.727606	0.784253	0.798918	0.847997	0.861475	0.820085	0.923766	0.831083	0.876448	0.855951	0.923761	0.850115	0.90324	0.850118	0.889033	0.888782	0.853806	0.832354	0.748007	0.874539	0.726601	0.808004	0.888567	0.861154	0.782343	0.781904	0.795538	0.791419	0.870105	0.841768
660	0.857929	0.859065	0.911192	0.875932	0.836699	0.825147	0.876689	0.829981	0.933546	0.797431	0.696215	0.895012	0.875918	0.8814	0.911851	0.885281	0.904777	0.911691	0.818437	0.744641	0.787917	0.787098	0.850681	0.872135	0.829917	0.925472	0.825149	0.88742	0.846842	0.939733	0.854226	0.902292	0.850603	0.894236	0.899604	0.859959	0.834301	0.765146	0.865664	0.723027	0.810873	0.895833	0.868591	0.785987	0.777115	0.792881	0.782906	0.885035	0.846233
662	0.860849	0.879855	0.92672	0.8819	0.836871	0.832786	0.890225	0.839506	0.920156	0.790526	0.698987	0.895558	0.893468	0.877174	0.911582	0.885246	0.918348	0.901811	0.816297	0.753218	0.801173	0.7941	0.842945	0.877264	0.848288	0.929361	0.821739	0.894606	0.845032	0.936305	0.857388	0.89876	0.85499	0.899544	0.889066	0.857811	0.821783	0.77846	0.85684	0.726923	0.812373	0.897687	0.889514	0.783999	0.780338	0.792212	0.775479	0.891308	0.857892
664	0.873659	0.875623	0.907433	0.885578	0.842867	0.83404	0.892316	0.846107	0.936407	0.786781	0.717403	0.91697	0.897407	0.880771	0.908073	0.88032	0.920195	0.909038	0.823015	0.756465	0.808099	0.810519	0.841704	0.879333	0.852498	0.921477	0.836067	0.884305	0.841598	0.951462	0.848931	0.902393	0.859619	0.891963	0.889529	0.860016	0.815993	0.78329	0.848092	0.726836	0.822587	0.898553	0.890646	0.790384	0.785078	0.780353	0.789383	0.893533	0.854306
666	0.871933	0.879784	0.920487	0.896741	0.847361	0.848577	0.900431	0.858507	0.938576	0.791468	0.717443	0.918919	0.909772	0.887518	0.901881	0.87066	0.922136	0.912927	0.821087	0.77366	0.826264	0.810183	0.844749	0.896766	0.85751	0.911752	0.85261	0.876621	0.842146	0.945997	0.842835	0.909658	0.865854	0.880289	0.903681	0.861961	0.810082	0.78436	0.856526	0.744814	0.828806	0.907053	0.899964	0.786067	0.796599	0.777618	0.782538	0.90216	0.858915
668	0.861542	0.881133	0.911257	0.892046	0.853859	0.840501	0.913723	0.866544	0.919774	0.78032	0.720358	0.903086	0.916726	0.889512	0.904791	0.870141	0.922287	0.908458	0.819873	0.768297	0.835164	0.810881	0.835176	0.901264	0.861117	0.901678	0.853376	0.867208	0.839059	0.934364	0.853338	0.911269	0.859938	0.881355	0.904014	0.870772	0.817977	0.787903	0.867036	0.738127	0.829906	0.91459	0.897003	0.782337	0.797816	0.77789	0.783175	0.894206	0.864252
670	0.877227	0.876513	0.9155	0.887768	0.867093	0.831283	0.932903	0.853757	0.924947	0.775465	0.733265	0.898928	0.914765	0.876896	0.903647	0.862806	0.917742	0.912515	0.820497	0.768094	0.832893	0.804481	0.833196	0.89472	0.854527	0.893439	0.849299	0.861681	0.848518	0.929438	0.861406	0.920929	0.864656	0.884014	0.896497	0.863184	0.810577	0.780535	0.867521	0.753303	0.828898	0.908818	0.891138	0.785153	0.802948	0.769108	0.778995	0.893848	0.870676
672	0.864242	0.872386	0.904814	0.885191	0.876259	0.830737	0.926123	0.853277	0.936307	0.791404	0.742306	0.898238	0.905553	0.876645	0.908793	0.864768	0.917786	0.923839	0.827545	0.769189	0.834205	0.802348	0.835493	0.889936	0.844076	0.890898	0.858977	0.861931	0.848353	0.920987	0.866275	0.920966	0.873379	0.879906	0.921311	0.862811	0.819907	0.773998	0.880848	0.752354	0.82411	0.907011	0.879927	0.786358	0.805464	0.766214	0.777428	0.895517	0.867547
674	0.873997	0.878995	0.91522	0.887291	0.880084	0.845122	0.926556	0.849845	0.934688	0.802342	0.738529	0.896117	0.909127	0.87885	0.906425	0.876383	0.925281	0.923513	0.838045	0.769267	0.83779	0.794463	0.849075	0.894538	0.850724	0.893053	0.851427	0.871306	0.849274	0.906174	0.865941	0.921894	0.872545	0.895542	0.917493	0.861751	0.828859	0.78245	0.886022	0.753014	0.825048	0.908145	0.889527	0.783395	0.7978	0.764737	0.772411	0.888769	0.883486
676	0.876478	0.873205	0.915845	0.875896	0.878618	0.846038	0.930827	0.862297	0.929724	0.808255	0.737937	0.88469	0.915365	0.875841	0.909933	0.893044	0.931557	0.923871	0.830803	0.763424	0.840609	0.805781	0.845759	0.881159	0.855237	0.901131	0.845412	0.871209	0.849773	0.908791	0.860814	0.926218	0.861608	0.914785	0.908705	0.864807	0.840722	0.772242	0.888809	0.745607	0.81569	0.909173	0.904816	0.776233	0.796832	0.763171	0.772684	0.88322	0.877488
678	0.872713	0.866547	0.916261	0.886518	0.877948	0.863194	0.916771	0.85907	0.937145	0.822187	0.74817	0.900452	0.908048	0.879088	0.899003	0.88975	0.933384	0.929071	0.830486	0.779563	0.841285	0.812201	0.852031	0.882527	0.863712	0.911037	0.852808	0.882913	0.866028	0.918357	0.849921	0.930844	0.883568	0.916463	0.915567	0.849385	0.844292	0.770468	0.881131	0.742154	0.820945	0.91237	0.911289	0.772747	0.794999	0.769763	0.785295	0.896435	0.874916
680	0.879067	0.870539	0.901771	0.887437	0.868724	0.870051	0.915807	0.869926	0.935045	0.831341	0.75387	0.901254	0.896534	0.890074	0.894468	0.891461	0.927385	0.938076	0.834626	0.793949	0.835293	0.830337	0.853374	0.887543	0.875634	0.915304	0.87087	0.886243	0.865302	0.919663	0.841626	0.931168	0.892544	0.909102	0.92289	0.863113	0.855281	0.777986	0.887405	0.739046	0.825189	0.919762	0.925415	0.77884	0.794236	0.790323	0.805305	0.909036	0.874804
682	0.880624	0.868276	0.900952	0.885084	0.861987	0.867425	0.925995	0.857355	0.934815	0.830737	0.760778	0.900447	0.902093	0.896933	0.903152	0.901234	0.927665	0.947923	0.825945	0.798881	0.836506	0.838017	0.851499	0.893093	0.876799	0.913716	0.871046	0.891916	0.86804	0.930499	0.837378	0.928235	0.885129	0.922457	0.910953	0.876471	0.858587	0.791373	0.877305	0.73696	0.830197	0.91996	0.931748	0.770643	0.796684	0.809923	0.822797	0.911863	0.869895
684	0.893489	0.874498	0.905133	0.886117	0.873572	0.864269	0.934213	0.871072	0.943875	0.830414	0.762943	0.905512	0.893854	0.900825	0.920658	0.900677	0.931108	0.949248	0.819112	0.806544	0.834151	0.855676	0.853733	0.89131	0.868877	0.911486	0.869641	0.88609	0.867156	0.933498	0.838059	0.932165	0.898393	0.916293	0.908771	0.876561	0.860555	0.780491	0.880771	0.752099	0.833511	0.924811	0.936106	0.77599	0.823513	0.815791	0.821267	0.921229	0.870614
686	0.88833	0.882359	0.90849	0.902299	0.882603	0.856134	0.936395	0.864749	0.944253	0.819784	0.76197	0.90795	0.881986	0.911803	0.926863	0.900059	0.923104	0.956598	0.826968	0.80627	0.828343	0.854535	0.858613	0.899428	0.86365	0.912296	0.871562	0.885371	0.87526	0.945871	0.856138	0.94103	0.906829	0.911566	0.923003	0.877088	0.865263	0.794189	0.880362	0.757504	0.848775	0.931897	0.930326	0.799683	0.823543	0.817625	0.820301	0.929926	0.877524
688	0.894491	0.89301	0.924896	0.906989	0.899826	0.864759	0.954081	0.877023	0.95357	0.819749	0.774481	0.919521	0.886329	0.916807	0.935115	0.916435	0.92443	0.96407	0.839842	0.816175	0.839741	0.847911	0.858594	0.911605	0.871647	0.920384	0.873934	0.899005	0.871013	0.949052	0.868748	0.941368	0.905135	0.903647	0.920515	0.895939	0.869739	0.816596	0.892139	0.770787	0.862783	0.925544	0.9382	0.80986	0.837898	0.833465	0.825832	0.942915	0.894059
690	0.897709	0.888857	0.939125	0.906934	0.904688	0.859797	0.957057	0.882254	0.961876	0.820206	0.768561	0.926722	0.894617	0.912976	0.945214	0.918094	0.929162	0.959427	0.839242	0.800854	0.852855	0.842164	0.852615	0.913863	0.864536	0.919818	0.870359	0.908002	0.874813	0.950789	0.87361	0.948529	0.905922	0.89871	0.914414	0.89093	0.862989	0.821043	0.891713	0.769913	0.868092	0.925366	0.946236	0.81163	0.842727	0.825391	0.809483	0.925732	0.894205
692	0.914135	0.889893	0.947514	0.920335	0.92084	0.879547	0.968607	0.895839	0.967091	0.826864	0.766133	0.93484	0.896432	0.912686	0.936017	0.916818	0.939324	0.958797	0.834113	0.814964	0.867474	0.843904	0.863032	0.919411	0.879947	0.934449	0.879703	0.905265	0.879705	0.967071	0.882054	0.954466	0.906051	0.904868	0.916999	0.894081	0.869959	0.809925	0.906573	0.77787	0.878189	0.93354	0.960197	0.830788	0.84577	0.817481	0.802562	0.919593	0.904221
694	0.888812	0.886125	0.957144	0.929847	0.920021	0.886115	0.973965	0.88489	0.96133	0.833855	0.774773	0.944689	0.911705	0.911299	0.952139	0.925136	0.956693	0.956315	0.850602	0.836656	0.880855	0.836198	0.867487	0.932368	0.882784	0.944369	0.889313	0.923633	0.895876	0.972912	0.894512	0.961856	0.902074	0.911984	0.942953	0.914889	0.883312	0.830944	0.925568	0.773734	0.881746	0.939662	0.955396	0.845797	0.837697	0.833779	0.819188	0.928894	0.909568
696	0.912174	0.892063	0.962303	0.923262	0.922471	0.894831	0.981355	0.895701	0.974623	0.851869	0.78385	0.956327	0.931738	0.910855	0.958542	0.930327	0.976132	0.963569	0.859439	0.842244	0.900489	0.845361	0.876187	0.934823	0.893333	0.95319	0.901998	0.94308	0.886367	0.979437	0.896961	0.9691	0.906904	0.91632	0.949338	0.923509	0.886108	0.849569	0.942369	0.785671	0.88457	0.943356	0.958068	0.836832	0.83944	0.844981	0.83189	0.922199	0.92122
698	0.932891	0.890015	0.946571	0.90554	0.9199	0.890317	0.980664	0.888287	0.977895	0.852086	0.771432	0.951348	0.934052	0.908697	0.972164	0.936022	0.980451	0.962676	0.853671	0.837461	0.897119	0.86026	0.874121	0.934666	0.883531	0.942771	0.90571	0.93493	0.892406	0.979739	0.901216	0.967254	0.902043	0.925998	0.953145	0.92989	0.879973	0.845042	0.937466	0.79313	0.879203	0.936975	0.950155	0.839994	0.834881	0.8382	0.820515	0.913382	0.910876
700	0.932637	0.900297	0.946144	0.915872	0.913751	0.919798	0.984843	0.8758	0.985626	0.86426	0.782263	0.952638	0.949159	0.918306	0.986935	0.941991	0.993692	0.969872	0.870486	0.842897	0.898285	0.86746	0.888442	0.935126	0.897273	0.947065	0.9111	0.937069	0.90462	0.978073	0.913453	0.965452	0.905698	0.947761	0.963897	0.941028	0.887928	0.847369	0.944902	0.808277	0.887323	0.937798	0.925771	0.842663	0.843273	0.8458	0.833978	0.924763	0.911995
702	0.908541	0.896703	0.959536	0.91488	0.913198	0.904692	0.978732	0.873663	0.99098	0.85725	0.786911	0.950558	0.953279	0.926517	0.992459	0.945989	0.983657	0.967023	0.886254	0.84065	0.897518	0.868188	0.885611	0.940197	0.882978	0.932751	0.915716	0.953589	0.912199	0.97492	0.914614	0.971328	0.927841	0.936862	0.966241	0.937942	0.879891	0.857452	0.935619	0.810479	0.895471	0.928875	0.916514	0.84567	0.839761	0.853668	0.847278	0.949251	0.90344
704	0.921202	0.898049	0.954694	0.91298	0.911158	0.901137	0.978058	0.880912	1.00624	0.864666	0.782722	0.952072	0.936824	0.930601	0.979878	0.948972	0.965817	0.978974	0.876491	0.842878	0.889062	0.8892	0.883866	0.94539	0.88507	0.94232	0.918256	0.958119	0.910544	0.965423	0.908528	0.970258	0.927396	0.949762	0.955783	0.936074	0.883908	0.85074	0.926849	0.809937	0.896574	0.932226	0.92807	0.837587	0.848484	0.861828	0.845719	0.953056	0.908394
706	0.914936	0.898703	0.947568	0.907652	0.906435	0.907798	0.991179	0.877159	1.00042	0.85853	0.789749	0.949976	0.939256	0.928828	0.977125	0.947365	0.954977	0.979863	0.88177	0.849066	0.873793	0.887792	0.877374	0.944038	0.895121	0.953251	0.912805	0.950889	0.923398	0.964388	0.909669	0.966716	0.934696	0.950259	0.957045	0.940581	0.88885	0.839742	0.92363	0.807996	0.903326	0.925881	0.922305	0.834723	0.859017	0.85906	0.852544	0.968083	0.905403
708	0.934216	0.909729	0.972717	0.936373	0.908767	0.914231	0.994182	0.890168	1.00771	0.876414	0.795411	0.965074	0.956338	0.94125	0.984536	0.95226	0.962101	0.988354	0.89928	0.849225	0.879424	0.888469	0.888352	0.949934	0.907784	0.963602	0.921409	0.961525	0.922069	0.976602	0.917383	0.968462	0.935528	0.958182	0.966927	0.945162	0.892728	0.851467	0.933426	0.802637	0.903205	0.941904	0.918772	0.839499	0.876716	0.861861	0.877533	0.96867	0.921445
710	0.925976	0.902306	0.979163	0.93289	0.927785	0.897946	1.00286	0.903782	1.004	0.876864	0.795148	0.962805	0.964942	0.950779	0.965618	0.971783	0.965416	0.996023	0.900691	0.856477	0.879298	0.891045	0.886873	0.961385	0.893469	0.966435	0.92433	0.961513	0.934307	0.992139	0.915444	0.970372	0.939702	0.95021	0.974585	0.948805	0.908138	0.845727	0.944034	0.798967	0.914501	0.935273	0.943287	0.846184	0.879151	0.861842	0.883712	0.973226	0.92885
712	0.941871	0.906503	0.97965	0.930725	0.935952	0.902759	1.00277	0.922632	1.00009	0.880118	0.80527	0.974538	0.963251	0.951593	0.988869	0.984804	0.965556	1.01112	0.901508	0.8481	0.873884	0.895996	0.90493	0.961757	0.897569	0.973482	0.913741	0.948275	0.940201	0.98087	0.919596	0.970184	0.925644	0.950075	0.978027	0.948591	0.925531	0.851655	0.964892	0.810644	0.904388	0.944177	0.954041	0.844253	0.88506	0.869709	0.892707	0.969295	0.94976
714	0.942554	0.912709	0.981274	0.938365	0.946814	0.906356	0.99983	0.927064	0.993527	0.870324	0.814329	0.968929	0.990026	0.954209	0.984909	0.979018	0.972503	1.01178	0.90122	0.831804	0.879198	0.881491	0.910012	0.947351	0.916004	0.969298	0.920389	0.9394	0.939583	1.00032	0.930858	0.967086	0.930459	0.938851	0.976179	0.947403	0.925437	0.847328	0.974196	0.815261	0.90488	0.936131	0.94516	0.837372	0.884954	0.87415	0.89891	0.967394	0.943804
716	0.943034	0.923257	0.980244	0.952364	0.955613	0.897401	0.98064	0.926612	1.00116	0.882578	0.820732	0.98475	0.973745	0.963465	0.992064	0.988107	0.982298	1.00208	0.898149	0.843227	0.894669	0.894385	0.919929	0.949829	0.916333	0.970733	0.934849	0.949308	0.943301	0.997806	0.933648	0.972687	0.934668	0.936117	0.973994	0.939903	0.913263	0.855916	0.96867	0.822581	0.904407	0.939479	0.958871	0.858125	0.884158	0.881256	0.89901	0.966384	0.93914
718	0.934568	0.911647	0.974683	0.942367	0.959948	0.900709	0.987241	0.927654	0.985473	0.887846	0.831109	0.977693	0.969848	0.954448	0.994268	0.993516	0.974441	1.0138	0.908457	0.846361	0.893694	0.907075	0.916638	0.958111	0.912971	0.975564	0.939393	0.94804	0.956253	0.988643	0.938735	0.976954	0.946582	0.94838	0.968613	0.942637	0.918445	0.857531	0.980389	0.823675	0.916911	0.944324	0.964724	0.854792	0.878258	0.880745	0.896775	0.968854	0.931293
720	0.947349	0.928334	0.975485	0.954149	0.963346	0.900656	0.986627	0.920757	0.978762	0.885141	0.833904	0.983467	0.967326	0.958753	1.00628	0.979788	0.968672	1.01171	0.903945	0.847318	0.894289	0.931455	0.914058	0.963598	0.932536	0.9896	0.934588	0.947716	0.946183	0.972748	0.943698	0.977669	0.941791	0.951971	0.967929	0.947021	0.897558	0.860433	0.977339	0.827082	0.907432	0.948314	0.963959	0.848287	0.882739	0.884443	0.907698	0.980722	0.933638
722	0.95792	0.930667	0.970734	0.955737	0.965172	0.887903	0.997979	0.909002	0.973269	0.899076	0.828073	0.981882	0.981207	0.956461	0.988784	0.969182	0.973434	1.00728	0.912099	0.858743	0.906415	0.941105	0.901057	0.961032	0.946481	1.00454	0.953297	0.953037	0.941311	0.985206	0.948692	0.976709	0.95208	0.958655	0.966691	0.958303	0.884163	0.859266	0.975554	0.826962	0.928599	0.948292	0.952431	0.848706	0.88521	0.889165	0.896212	0.970281	0.916401
724	0.950816	0.937115	0.966253	0.940334	0.946512	0.902907	0.996984	0.920417	0.970634	0.906499	0.825576	0.990555	0.969803	0.958995	0.97933	0.97677	0.96785	1.00391	0.919249	0.872648	0.90954	0.93914	0.903607	0.971897	0.933626	1.00578	0.961829	0.955298	0.94354	0.979236	0.950289	0.980446	0.953046	0.968994	0.977624	0.964386	0.881056	0.871754	0.963853	0.831024	0.926858	0.947809	0.962476	0.853026	0.887666	0.882408	0.886231	0.964193	0.913457
726	0.93902	0.941802	0.969994	0.931129	0.944663	0.920802	1.00646	0.928504	0.963542	0.907891	0.817978	0.982137	0.99174	0.951335	0.980208	0.976435	0.958	1.00513	0.929477	0.859373	0.904552	0.924742	0.910435	0.971701	0.929763	0.980829	0.950411	0.939033	0.940179	0.987948	0.938824	0.973167	0.946368	0.980917	0.974229	0.974626	0.8882	0.864552	0.967391	0.827229	0.927351	0.942751	0.960607	0.846939	0.892529	0.875274	0.891485	0.959792	0.912565
728	0.937167	0.956459	0.962417	0.931323	0.949734	0.923338	1.003	0.941087	0.974689	0.906265	0.825808	0.975872	1.00049	0.962102	0.973696	0.972134	0.979128	0.996865	0.915063	0.866542	0.909582	0.923973	0.931249	0.965955	0.937755	0.982966	0.946097	0.937193	0.934419	0.998679	0.933998	0.983839	0.94348	0.973605	0.979284	0.972591	0.897356	0.862279	0.956331	0.83767	0.919784	0.955032	0.977178	0.852823	0.894047	0.881908	0.885602	0.969193	0.914778
730	0.946798	0.951255	0.963064	0.924509	0.943365	0.936151	0.993943	0.946831	0.975973	0.914131	0.826385	0.970832	0.999896	0.950761	0.981656	0.967832	0.979818	0.992423	0.927633	0.868792	0.926387	0.907519	0.945889	0.956716	0.93885	0.984418	0.958614	0.940654	0.940304	1.02448	0.927314	0.97846	0.94585	0.990428	0.983662	0.968765	0.916713	0.864978	0.960602	0.843345	0.922865	0.958923	0.978109	0.863441	0.898835	0.890631	0.8805	0.946531	0.913435
732	0.967603	0.964202	0.97955	0.937915	0.949223	0.961059	0.999501	0.966434	0.990702	0.920294	0.842261	0.965016	1.01252	0.957585	0.994959	0.9806	0.990366	0.985011	0.92916	0.871051	0.907417	0.902847	0.962275	0.965186	0.929754	0.982549	0.964853	0.95242	0.942158	1.02238	0.925533	0.986245	0.956924	1.01005	0.993115	0.953027	0.936431	0.87136	0.953121	0.84001	0.912838	0.967299	1.00098	0.866511	0.894488	0.884834	0.893277	0.958124	0.932164
734	0.959919	0.956873	0.976094	0.947474	0.966246	0.944516	1.00754	0.96568	0.992188	0.914635	0.847195	0.956865	1.01817	0.963947	1.00853	0.987057	1.01165	0.981922	0.932666	0.875666	0.909869	0.912287	0.965349	0.967184	0.929753	0.980797	0.948662	0.96554	0.950571	1.03307	0.927519	0.987197	0.961813	1.00844	0.998438	0.948933	0.951092	0.88649	0.967087	0.836464	0.914397	0.975495	0.986583	0.874174	0.901397	0.876366	0.908601	0.966238	0.950048
736	0.973632	0.955098	0.993325	0.966475	0.966991	0.949152	1.02108	0.961751	1.00646	0.921248	0.846238	0.963994	1.01216	0.968329	1.01702	0.990039	1.0239	1.00036	0.948011	0.893877	0.921595	0.933231	0.958992	0.970198	0.93595	1.0025	0.953056	0.98017	0.946217	1.03668	0.945433	0.982539	0.978212	1.00531	1.01604	0.943811	0.953628	0.889294	0.979307	0.849347	0.922487	0.99455	0.993666	0.876271	0.899673	0.889231	0.926737	0.976597	0.951048
738	0.959286	0.949844	1.00511	0.963195	0.957407	0.944605	1.01989	0.958066	1.00621	0.922455	0.830476	0.975324	1.0066	0.965274	1.02279	0.981716	1.01257	0.995503	0.952748	0.896784	0.92782	0.93021	0.957076	0.960776	0.935714	1.00303	0.959204	0.983431	0.951121	1.03006	0.934965	0.980255	0.96718	1.00028	1.01604	0.952152	0.940103	0.882759	0.986068	0.844824	0.928017	0.975328	0.976794	0.874111	0.899813	0.900388	0.921465	0.960432	0.961496
740	0.978726	0.952908	1.0138	0.9793	0.955435	0.93876	1.01919	0.96359	1.01494	0.922915	0.841632	0.979698	1.00316	0.963077	1.00593	0.993212	1.01218	0.995474	0.942787	0.907775	0.927043	0.940751	0.953907	0.962422	0.932362	0.989353	0.948314	0.990404	0.958399	1.02756	0.933751	0.987989	0.982293	0.995468	1.00466	0.956924	0.948934	0.895133	0.976755	0.846509	0.931956	0.987788	0.980155	0.874863	0.895926	0.896184	0.925641	0.97412	0.972914
742	0.963558	0.942354	0.999241	0.994432	0.942993	0.930861	0.998621	0.944698	1.00359	0.919714	0.836464	0.986876	0.979922	0.956847	0.995238	0.982003	1.00892	0.997338	0.941021	0.911087	0.943373	0.941174	0.942405	0.95716	0.93983	0.983657	0.929639	0.984915	0.949506	1.03181	0.937441	0.981366	0.975981	0.968328	0.998827	0.966688	0.935744	0.911187	0.980078	0.855232	0.937148	0.994484	0.97244	0.881862	0.902296	0.896903	0.919906	0.970382	0.965548
744	0.965423	0.948859	1.00916	1.0019	0.950306	0.937224	1.00608	0.939865	1.01299	0.929557	0.833934	1.00562	0.977234	0.958009	1.00941	0.989307	0.994886	0.995294	0.942734	0.904239	0.947766	0.950987	0.955843	0.953336	0.948148	0.985671	0.947689	0.97947	0.943687	1.02964	0.939679	0.985822	0.972502	0.975649	0.991692	0.974644	0.918937	0.906979	0.979494	0.86567	0.94676	0.996069	0.99483	0.891749	0.900761	0.917707	0.922091	0.972928	0.963148
746	0.950792	0.955202	0.99046	0.997775	0.959466	0.92745	1.0046	0.943624	1.00984	0.925176	0.83673	1.00754	0.979053	0.96255	1.0192	0.985243	1.00188	0.988378	0.92429	0.909221	0.953149	0.944811	0.961867	0.964873	0.947537	0.984985	0.94731	0.967014	0.953068	1.02617	0.944673	0.993685	0.963278	0.985001	0.985528	0.978622	0.928294	0.90493	0.976102	0.872168	0.936395	0.996682	0.992091	0.879732	0.90394	0.911563	0.904129	0.975294	0.969552
748	0.978221	0.968758	0.97894	1.00035	0.966248	0.917903	0.998571	0.934674	1.00142	0.927337	0.841238	0.999522	0.978077	0.958392	1.01578	0.999572	1.006	0.994087	0.937411	0.907236	0.95113	0.960755	0.95378	0.975696	0.957859	0.986651	0.958886	0.963547	0.954056	1.02761	0.959467	0.987885	0.977798	0.978922	0.978944	0.981245	0.936609	0.913188	0.978943	0.878325	0.933608	0.999571	0.995479	0.884458	0.897716	0.905354	0.919014	0.985566	0.956253
750	0.977732	0.972265	0.962427	0.99028	0.962617	0.933277	0.996172	0.932813	1.00144	0.924507	0.840397	1.00642	0.975257	0.960654	1.02735	0.99478	1.00811	0.997259	0.949628	0.911697	0.958317	0.953596	0.95411	0.97942	0.969617	1.00509	0.9602	0.966794	0.96039	1.02573	0.967474	0.989067	0.969572	0.975643	0.974652	0.984463	0.933832	0.910823	0.973755	0.881892	0.939717	0.992714	1.0027	0.883193	0.913912	0.917277	0.912298	0.984059	0.943812
752	0.962734	0.972995	0.964899	0.977076	0.970571	0.942455	1.01376	0.945075	1.01177	0.928308	0.843895	1.00462	0.988297	0.96909	1.04588	1.01794	1.00909	0.999441	0.947214	0.918915	0.957851	0.970942	0.969345	0.985913	0.968495	0.998607	0.975733	0.980469	0.979124	1.0329	0.97152	1.00385	0.97181	0.982275	0.988378	0.997495	0.950351	0.901579	0.981909	0.884304	0.940359	0.989042	1.0042	0.892566	0.914935	0.931523	0.923328	0.991468	0.948104
754	0.968499	0.970823	0.984528	0.986625	0.965696	0.953826	1.00482	0.949517	1.00447	0.932759	0.84475	1.00049	0.995755	0.957171	1.04939	1.00586	1.02306	1.00068	0.952713	0.924717	0.951514	0.958038	0.954647	0.981557	0.974581	1.00029	0.979886	0.978702	0.986096	1.03454	0.967324	0.999408	0.977155	0.986053	0.986529	1.00107	0.964271	0.908289	0.990736	0.867714	0.940427	0.996833	0.991005	0.884169	0.920472	0.932349	0.925655	0.990435	0.948499
756	0.991098	0.979164	1.00365	0.995565	0.965349	0.962967	1.01971	0.954635	1.01289	0.941629	0.846457	1.00315	1.00259	0.959926	1.05488	1.01308	1.02368	1.00882	0.960169	0.911966	0.954685	0.959251	0.96223	0.977212	0.995713	1.02715	0.991732	0.989391	1.00601	1.03669	0.953719	1.01957	0.97848	0.992972	0.986357	1.01198	0.983975	0.923137	1.00371	0.871229	0.950056	0.98902	0.99325	0.907467	0.919542	0.937331	0.936272	0.988944	0.966289
758	0.978413	0.973318	1.01441	1.00876	0.974456	0.978319	1.04686	0.967138	1.02283	0.939985	0.860292	1.00891	1.00339	0.969027	1.05291	1.01251	1.01666	1.01737	0.952034	0.921693	0.962403	0.966711	0.973927	0.979187	1.00309	1.03225	0.982992	0.996045	1.00574	1.04129	0.951324	1.02094	0.987601	1.01327	0.991254	1.00975	0.997793	0.928791	1.00884	0.888671	0.95716	0.99946	0.992201	0.911099	0.942801	0.938056	0.943481	0.996498	0.977881
760	1.01494	0.979978	1.03644	1.01699	0.987909	0.979347	1.06022	0.973888	1.03223	0.949475	0.857923	1.0045	1.00802	0.972406	1.06716	1.02537	1.01857	1.03249	0.958411	0.930298	0.969136	0.978835	0.984631	0.992126	1.00541	1.03506	0.999313	0.987882	0.996896	1.03312	0.961832	1.02588	0.991914	1.0233	1.01323	1.01931	1.00882	0.936362	1.02918	0.897336	0.954768	1.00866	0.986789	0.924314	0.950813	0.92938	0.958817	1.00837	0.991434
762	0.996423	0.997856	1.03581	1.02805	0.990499	0.976443	1.07882	0.980438	1.02627	0.95485	0.858383	1.00905	1.00961	0.978662	1.05893	1.01399	1.02568	1.04786	0.969296	0.925534	0.972479	0.967799	0.99302	0.99921	1.00746	1.04326	1.01524	0.985552	0.98434	1.02866	0.965668	1.03241	1.00343	1.03172	1.00783	1.0146	0.998834	0.936764	1.03177	0.903656	0.951127	1.0081	0.978693	0.921534	0.958406	0.939053	0.958353	1.02113	1.0018
764	1.00659	1.0066	1.01444	1.02836	0.990763	0.983329	1.09983	0.988172	1.02465	0.96385	0.866516	1.00837	1.01565	0.994057	1.06425	1.02615	1.0306	1.06763	0.980164	0.928616	0.97728	0.998453	1.00564	1.01558	1.00825	1.04576	1.00794	0.987494	0.991471	1.03509	0.980545	1.03822	1.01156	1.02569	1.02128	1.02215	0.996642	0.936115	1.04077	0.925416	0.96058	1.0078	0.9926	0.934276	0.958593	0.93885	0.958634	1.03438	1.01119
766	0.998632	1.0002	1.01381	1.02442	1.01026	0.99043	1.09035	1.0015	1.01815	0.963571	0.886958	1.0076	1.01685	0.998344	1.04683	1.02212	1.02026	1.05852	0.9838	0.935669	0.980431	1.00071	1.00232	1.02728	0.991022	1.02691	1.01047	0.995336	0.978724	1.02289	0.99244	1.03	1.01232	1.00483	1.02945	1.02275	0.971143	0.93588	1.03238	0.917406	0.967701	1.0072	0.996807	0.927821	0.974745	0.946762	0.965666	1.03426	1.00477
768	1.01057	1.00077	1.01248	1.01794	0.994156	0.990574	1.07981	1.00266	1.02314	0.966503	0.878989	1.0139	1.02323	0.998776	1.0525	1.0201	1.02588	1.0574	0.982188	0.929601	0.977606	0.986102	0.999153	1.02658	0.988143	1.01767	1.00833	0.983194	0.979817	1.02591	0.988361	1.0528	1.01772	1.00339	1.03085	1.02606	0.971198	0.93612	1.03554	0.911661	0.982053	1.01152	1.01078	0.92944	0.969973	0.947455	0.957672	1.0344	0.999293
770	1.00871	0.983737	0.997682	1.00659	0.987508	0.996291	1.08468	1.00026	1.01439	0.962644	0.874803	1.01664	1.01775	1.00375	1.03539	1.02308	1.03473	1.04473	0.985976	0.920069	0.96555	0.979082	0.997733	1.02335	0.985861	0.998304	1.00779	0.978191	0.975715	1.01763	0.988237	1.04635	1.00938	0.992531	1.02359	1.01205	0.971091	0.937821	1.02857	0.911236	0.980737	1.00304	1.02549	0.922738	0.955485	0.95288	0.955547	1.03266	1.00342
772	0.999587	0.979479	0.995526	0.991208	0.992986	1.00174	1.08011	1.01541	1.02383	0.957011	0.881911	1.01341	1.02009	1.00734	1.03243	1.01954	1.02434	1.04174	0.988364	0.928151	0.976511	0.983251	0.994599	1.01631	0.982921	1.00808	0.992294	0.971172	0.982295	1.01934	0.982189	1.03465	0.988587	0.995694	1.02458	1.01251	0.967434	0.94877	1.01483	0.907853	0.997277	1.00026	1.05334	0.929466	0.95565	0.939894	0.956452	1.02552	0.999217
774	0.987237	0.977127	0.999284	0.976585	0.992186	0.988871	1.06933	1.00889	1.02469	0.949333	0.875918	1.01246	1.01111	1.00016	1.03983	1.00807	1.02076	1.03277	0.991321	0.932918	0.976939	0.956364	0.998952	1.00359	0.974788	1.01107	0.989805	0.969337	0.977299	1.01602	0.970362	1.02917	0.977981	0.998564	1.00971	1.0021	0.966203	0.944488	0.9952	0.910991	0.987976	0.990188	1.04449	0.929416	0.960667	0.938481	0.966552	1.01412	0.987067
776	1.00337	0.978196	0.990466	0.97189	0.971725	0.9862	1.06536	1.00136	1.02238	0.943626	0.87564	1.00523	0.999312	0.996166	1.04063	1.0134	1.0299	1.03811	0.988384	0.940228	0.957903	0.949646	0.9919	0.987712	0.976569	1.00868	0.97814	0.96711	0.967952	1.026	0.976767	1.01896	0.981204	1.01268	0.994941	0.999401	0.967399	0.946697	0.981988	0.913057	0.988096	0.988926	1.04077	0.927814	0.944978	0.933763	0.961516	1.01732	0.976112
778	0.99583	0.977039	0.997433	0.968281	0.988403	0.984746	1.06936	1.00841	1.01361	0.941839	0.881911	1.0036	0.986144	1.00015	1.03833	1.01149	1.03954	1.02748	0.990322	0.952514	0.959397	0.962085	0.995489	0.991656	0.972762	1.0123	0.984763	0.986519	0.960549	1.02499	0.992681	0.989098	0.969437	1.0029	0.986348	1.00356	0.963378	0.940544	0.952982	0.921219	0.983595	0.976963	1.0449	0.933281	0.943691	0.931891	0.958843	1.02565	0.981076
780	0.988144	0.994573	1.01028	0.97518	1.00456	0.981439	1.06607	1.01076	1.02542	0.944366	0.904211	1.00553	0.992247	0.995208	1.05692	0.99921	1.04856	1.03205	0.989935	0.953052	0.952591	0.962848	1.00822	0.991834	0.971241	1.03487	0.974452	1.00268	0.969221	1.03372	0.996113	0.986758	0.988669	1.00509	0.994041	1.00563	0.962792	0.942329	0.958079	0.926644	0.997853	0.996031	1.02713	0.942707	0.95121	0.936543	0.961619	1.03001	0.98468
782	0.995571	0.990678	1.01489	0.985724	1.00999	0.980908	1.04807	0.996067	1.02272	0.949378	0.896142	1.01206	0.984738	0.992465	1.04885	1.00266	1.05519	1.00796	0.978475	0.95248	0.945895	0.966171	1.00405	0.989541	0.980799	1.02695	0.98086	1.00152	0.965548	1.0377	0.994692	0.985425	1.00016	1.00805	0.99947	1.01535	0.97302	0.933064	0.970155	0.915859	0.983675	0.996764	1.01987	0.933014	0.959787	0.929406	0.949631	1.03832	0.994062
784	1.01022	0.988874	1.01692	0.98513	1.00917	0.996346	1.04502	1.00588	1.03221	0.950441	0.918864	1.0121	0.997571	0.9936	1.0231	1.0043	1.05143	1.01061	0.970364	0.951764	0.951234	0.969511	0.996026	0.999675	0.997092	1.01622	0.989039	1.01722	0.969317	1.02794	0.999041	0.986461	1.00297	1.00623	1.00663	1.00285	0.983969	0.937358	0.973262	0.910115	0.987776	1.0092	1.03496	0.936113	0.957507	0.929902	0.948017	1.04185	1.00382
786	0.992154	0.971713	1.00929	0.983346	1.00402	0.990544	1.03399	0.995666	1.03441	0.958367	0.907417	1.01316	1.00219	0.99655	1.02385	1.00399	1.04729	1.00533	0.97308	0.955414	0.966797	0.975838	1.00782	1.01079	0.996263	1.01196	0.985409	1.01253	0.984086	1.02372	0.989823	0.9867	1.01349	1.01405	1.00997	1.01049	0.985595	0.935878	0.979878	0.923973	0.98792	1.0203	1.03337	0.937278	0.966756	0.922335	0.943931	1.04935	1.01909
788	0.993235	0.975797	1.01568	1.01186	0.994071	0.997186	1.03223	0.99315	1.04619	0.964799	0.918718	1.01293	1.01322	0.999736	1.03321	1.02805	1.04746	1.02428	0.975471	0.960387	0.97964	0.985244	1.01699	1.00792	1.00231	1.02507	1.0001	1.0193	0.986984	1.03	0.987729	0.999856	1.01977	1.03036	1.02579	1.01006	1.00346	0.947868	1.00358	0.935638	0.98324	1.03432	1.0215	0.944	0.973645	0.917682	0.958996	1.05168	1.03174
790	0.99107	0.973265	1.02243	1.01949	0.990552	0.990461	1.04141	0.997883	1.04082	0.97006	0.910396	1.01934	1.02422	1.00263	1.03087	1.0392	1.04069	1.02884	0.9694	0.969666	0.996198	0.98625	1.00293	0.99919	1.00244	1.01492	1.01179	1.00648	0.983961	1.0285	0.98969	1.01425	1.00462	1.0384	1.02381	1.01864	1.00606	0.952183	0.998205	0.925443	0.980263	1.02711	1.03188	0.934162	0.961417	0.914897	0.954445	1.03066	1.0262
792	1.02818	0.978273	1.03888	1.02358	0.993222	0.992732	1.04813	1.00218	1.04003	0.971601	0.930471	1.0201	1.03096	1.00105	1.03176	1.03519	1.04481	1.04953	0.987637	0.975284	0.997928	0.994989	1.00676	1.01154	1.00493	1.02241	1.01243	1.01973	1.00496	1.02899	0.999402	1.02299	1.01207	1.03951	1.02428	1.01962	1.01589	0.966585	0.991578	0.948156	1.00059	1.03331	1.03046	0.945921	0.970878	0.927867	0.968164	1.01565	1.01199
794	1.01089	0.997662	1.04387	1.02939	1.01127	1.00188	1.05747	1.0009	1.03009	0.981465	0.923167	1.02106	1.01905	0.996515	1.04305	1.0292	1.04949	1.03994	0.987251	0.982675	1.00887	1.01087	1.01945	1.0102	0.987297	1.03527	1.00545	1.02006	0.99358	1.03405	0.992424	1.04837	1.01555	1.0478	1.03364	1.0334	0.999595	0.96501	1.011	0.958834	1.00254	1.02871	1.02225	0.954235	0.967936	0.934887	0.966918	1.02379	1.00844
796	1.02299	1.01572	1.04423	1.03031	1.02044	1.0037	1.06364	1.00785	1.0322	0.981784	0.929082	1.02347	1.01731	0.998657	1.04275	1.02747	1.05822	1.05448	1.00046	0.979759	1.00978	1.02629	1.01494	1.00892	0.982466	1.03871	1.02048	1.03077	0.992737	1.02991	0.985142	1.05325	1.00911	1.04374	1.0424	1.02669	1.00474	0.970365	1.01787	0.9525	0.997408	1.02371	1.02476	0.966251	0.965045	0.941789	0.969061	1.01316	1.01036
798	1.01546	1.0051	1.04492	1.02488	1.03213	1.00715	1.06051	1.00985	1.02674	0.984773	0.925313	1.02873	1.02814	0.987349	1.04209	1.00265	1.06131	1.03712	1.0038	0.965339	0.999422	1.01688	1.00293	1.02049	0.976743	1.02456	1.00588	1.01518	0.994303	1.02372	0.988229	1.05691	1.00431	1.03516	1.0368	1.01321	0.981653	0.960599	1.01731	0.933647	1.00699	1.01174	1.03224	0.961957	0.957813	0.947797	0.960542	1.00599	1.00879
800	1.00588	0.991235	1.02884	1.00625	1.04189	1.00816	1.05212	1.01057	1.02606	0.971667	0.922422	1.01339	1.01079	0.988313	1.02547	0.987711	1.04834	1.02821	0.992929	0.952346	0.985392	1.01234	1.00343	1.02499	0.971957	1.02349	0.998841	1.03735	0.986047	1.03718	0.991368	1.04559	1.00697	1.04173	1.01523	1.00008	0.95741	0.953294	1.01372	0.939533	1.00381	1.00259	1.03038	0.967314	0.962018	0.956611	0.966083	1.0219	0.999001
802	1.00624	0.98426	1.01406	1.00655	1.03196	1.00978	1.04056	0.991757	1.02909	0.959424	0.911486	1.00572	1.01835	0.996198	1.0338	0.991239	1.04773	1.03348	0.97795	0.958008	0.987618	1.00478	1.00399	1.01455	0.963776	1.02809	0.994413	1.01547	0.981108	1.04626	0.991442	1.03542	0.994786	1.03561	1.0098	0.998463	0.948438	0.949496	1.02361	0.933524	0.99866	0.990205	1.02517	0.970228	0.949783	0.960885	0.96567	1.03213	1.01767
804	0.990924	0.959656	1.02007	1.01228	1.02758	0.997493	1.03693	0.985281	1.03001	0.963063	0.919826	1.00577	1.01937	0.999975	1.03858	1.00324	1.04453	1.04	0.973465	0.958464	0.986386	1.00315	0.998867	1.01452	0.985553	1.03581	1.00898	1.00692	0.988355	1.05712	1.0052	1.00829	0.993262	1.03934	1.0018	1.00244	0.959279	0.959993	1.00201	0.92629	1.00548	0.993705	1.02983	0.963274	0.957447	0.958695	0.960596	1.02758	1.01487
806	1.00612	0.960394	1.02743	1.02023	1.02323	1.00232	1.05058	0.974603	1.01861	0.96067	0.934248	1.00519	1.02383	0.991657	1.0343	1.01345	1.04494	1.02371	0.967188	0.958116	0.993873	0.995335	1.00329	1.01343	0.98807	1.02539	1.00852	1.00173	0.994091	1.0761	1.00962	1.01192	0.991644	1.04036	0.992504	1.00469	0.958591	0.951475	0.999347	0.915554	1.01263	1.00066	1.03779	0.958131	0.955025	0.966093	0.970361	1.04107	1.00155
808	1.01836	0.97581	1.02289	1.01079	1.01625	1.0005	1.0484	0.965848	1.01623	0.961877	0.934032	0.998181	1.0165	0.997224	1.02925	1.01883	1.03232	1.04057	0.976844	0.969211	0.991704	0.986467	1.0016	0.998658	0.984075	1.02807	1.00777	1.0106	0.998248	1.08445	1.00389	1.00631	0.986579	1.0357	0.996445	1.01881	0.96938	0.958724	1.00166	0.926412	1.01428	1.01459	1.03415	0.95559	0.950508	0.974701	0.986495	1.0407	0.991979
810	1.0129	0.983498	1.03698	1.03762	1.016	0.997653	1.06139	0.977815	1.01142	0.977906	0.958039	1.01262	1.0211	1.00145	1.04084	1.03663	1.0441	1.04582	0.98224	0.978483	1.01343	0.987892	1.0119	1.00332	0.992958	1.02943	1.0127	1.01234	1.0101	1.08581	1.00642	1.02306	0.997796	1.033	1.01027	1.02062	0.987669	0.979868	1.01446	0.929013	1.00754	1.02877	1.04339	0.954286	0.958167	0.974539	0.991687	1.05215	1.0115
812	1.0108	0.990651	1.03408	1.02393	1.0152	1.00511	1.06857	0.994711	1.01234	0.984167	0.963592	1.01862	1.02261	0.98325	1.03944	1.03904	1.03793	1.03487	0.993484	0.962701	1.00992	0.995985	1.01028	1.00504	0.987685	1.01606	1.01141	1.0293	1.01427	1.07744	1.01479	1.02856	0.993737	1.03642	1.00514	1.01928	0.991231	0.978722	1.00736	0.934521	1.01379	1.0341	1.03768	0.962672	0.954208	0.966551	0.993812	1.04331	1.00659
814	1.02687	1.01848	1.03106	1.02764	1.01047	1.01119	1.08495	1.00837	1.02411	0.981188	0.963931	1.01976	1.01794	0.999276	1.04435	1.03511	1.0503	1.02997	1.01925	0.963754	1.01487	0.994967	1.0167	1.01649	0.964888	1.00756	1.0086	1.04247	1.0139	1.07334	1.01647	1.03277	0.993184	1.03834	1.00937	1.02256	0.995479	0.978337	0.999039	0.933473	1.02554	1.03866	1.03615	0.97848	0.949088	0.961745	0.995101	1.04422	1.02118
816	1.00792	1.0195	1.03911	1.03584	1.00805	1.01797	1.08185	1.02602	1.03556	0.984208	0.958499	1.03182	1.0281	1.01033	1.06302	1.03107	1.0448	1.03707	1.01212	0.96652	1.01141	1.00334	1.00586	1.01429	0.959496	1.0244	1.00756	1.03536	1.00418	1.07039	1.02789	1.03496	1.0055	1.03359	1.01594	1.03369	1.00977	0.990066	0.99772	0.942982	1.02991	1.03247	1.02	0.981847	0.960485	0.951983	0.990726	1.03823	1.02795
818	1.03007	1.02103	1.02793	1.02465	1.01326	1.01903	1.08523	1.0314	1.03445	0.987858	0.956823	1.03143	1.02933	1.00945	1.0574	1.03312	1.0515	1.03209	1.00876	0.960145	1.01092	1.00713	1.00841	1.02285	0.956068	1.02441	1.00537	1.03032	0.999375	1.06975	1.03554	1.02955	1.00862	1.04961	1.00954	1.02617	1.01405	0.990145	1.00112	0.937052	1.01186	1.02721	1.02759	0.998575	0.981536	0.947891	0.984623	1.0481	1.03049
820	1.02299	1.02983	1.02014	1.01289	1.00482	1.03092	1.07704	1.01471	1.04184	0.995603	0.943268	1.03832	1.04724	0.994452	1.05586	1.03062	1.05257	1.01814	1.0192	0.957625	1.00338	1.01146	1.00763	1.02828	0.955774	1.02682	1.00898	1.03043	0.993716	1.07061	1.02946	1.01948	1.00847	1.04855	1.0235	1.03471	1.01473	0.98631	0.996952	0.934651	1.02582	1.01722	1.01915	1.00403	0.985541	0.948349	0.979337	1.04724	1.02053
822	1.01667	1.04743	1.03389	1.0168	1.01784	1.02259	1.08416	1.02197	1.0361	0.991881	0.934518	1.03959	1.05539	0.998314	1.06229	1.02767	1.06018	1.01864	1.00531	0.978242	1.00163	1.00955	1.0119	1.03887	0.957026	1.02263	1.01789	1.02963	0.990989	1.06971	1.02915	1.01823	1.01678	1.06243	1.04042	1.02932	1.01558	0.991902	1.01412	0.939105	1.01243	1.02988	1.02891	0.990836	1.0006	0.961605	0.986217	1.05562	1.02043
824	1.02741	1.02997	1.03961	1.01861	1.0127	1.02741	1.07514	1.02572	1.03291	0.988975	0.931816	1.03971	1.05976	0.987917	1.05866	1.03832	1.04069	1.02917	0.989859	0.974982	1.00269	1.02508	1.0142	1.02969	0.971385	1.02536	1.02253	1.00668	0.996855	1.07065	1.02633	1.02525	1.03483	1.05165	1.04265	1.02381	1.02025	0.985754	1.01507	0.948723	0.99376	1.0263	1.02632	0.985852	1.01513	0.966947	0.986444	1.06465	1.02961
826	1.01654	1.01657	1.04094	1.01424	1.02825	1.02774	1.07143	1.01821	1.03277	1.00101	0.933654	1.02715	1.06065	0.978803	1.06417	1.03256	1.04289	1.03217	0.987244	0.98205	0.997798	1.02389	1.02461	1.03471	0.983614	1.01565	1.0254	1.01107	0.997687	1.05684	1.03132	1.02761	1.02786	1.05487	1.03846	1.01104	1.02408	0.992243	1.02773	0.958335	1.00129	1.0364	1.03128	0.98885	1.01832	0.982575	0.974926	1.0763	1.02832
828	1.02876	1.00882	1.04127	1.01171	1.03295	1.03437	1.07196	1.01638	1.03553	1.0059	0.937342	1.02694	1.06178	0.977106	1.0688	1.03862	1.05355	1.03788	0.985099	0.979956	1.00787	1.02459	1.02384	1.0288	0.983461	1.02516	1.02704	1.00564	1.00496	1.05184	1.00976	1.03638	1.04277	1.0495	1.05177	1.01858	1.02154	1.00135	1.02972	0.965722	1.01908	1.03111	1.02134	0.977834	1.01692	0.982541	0.967429	1.06655	1.03514
830	1.02643	0.998155	1.0531	1.00927	1.03018	1.02011	1.07543	1.0296	1.03224	1.00009	0.936716	1.03265	1.05565	0.996329	1.05513	1.03853	1.04786	1.05074	0.975344	0.984032	1.00781	1.036	1.03278	1.0269	0.986492	1.02435	1.0264	1.00225	1.00337	1.04709	1.01596	1.04067	1.04122	1.05467	1.04025	1.02937	1.02984	1.0044	1.02371	0.976199	1.01035	1.02807	1.02475	0.980071	1.00724	0.983755	0.971487	1.05985	1.03535
832	1.01687	0.976824	1.04894	1.02052	1.03061	1.03139	1.06548	1.01729	1.03639	1.00892	0.953173	1.05064	1.03503	1.00345	1.05884	1.049	1.05608	1.04917	1.00352	0.980373	1.02178	1.03536	1.03018	1.03117	1.00635	1.03445	1.01482	1.00133	0.997618	1.05047	1.01574	1.05389	1.04235	1.05021	1.04116	1.02383	1.02526	1.00966	1.01312	0.981685	1.01601	1.01661	1.02973	0.974121	1.00729	0.972231	0.959313	1.05341	1.02678
834	1.02722	0.978944	1.04391	1.01824	1.04057	1.02834	1.05828	1.01412	1.03924	1.02621	0.960439	1.04663	1.03864	1.00462	1.06431	1.04761	1.07558	1.04687	1.00512	0.976052	1.01494	1.03737	1.02483	1.02409	1.0133	1.02822	1.00665	1.0234	0.995891	1.05504	1.02133	1.05223	1.01371	1.05681	1.04199	1.02572	1.02654	1.00836	1.03858	0.983749	1.02889	1.0229	1.02962	0.974867	1.01199	0.973699	0.96146	1.04742	1.01293
836	1.0226	0.99975	1.04051	1.01667	1.03793	1.02783	1.06209	1.01709	1.03602	1.02215	0.961737	1.05413	1.02426	1.01641	1.0552	1.05808	1.0742	1.04564	1.01808	0.973284	1.0185	1.03601	1.04252	1.04108	1.01982	1.03729	0.995927	1.03032	0.999049	1.06953	1.01206	1.05818	1.00904	1.06222	1.04755	1.02406	1.0161	0.998913	1.03751	0.979357	1.02065	1.01532	1.04565	0.960027	1.002	0.975207	0.976122	1.03045	1.00976
838	1.03017	1.00095	1.03573	1.03352	1.03908	1.01535	1.06938	1.01872	1.03755	1.01689	0.967445	1.05574	1.02901	1.02082	1.05503	1.05524	1.05421	1.02487	1.0243	0.987478	1.00022	1.04048	1.0461	1.05482	1.03272	1.03122	1.00114	1.03971	1.00364	1.07626	1.02514	1.0537	1.0076	1.06249	1.02994	1.0249	1.02122	0.993518	1.03722	0.973233	1.01232	1.02229	1.04671	0.959101	0.98797	0.985518	0.982855	1.02542	1.00788
840	1.02767	1.00965	1.02732	1.04303	1.04145	1.01625	1.06143	1.01673	1.03536	1.0163	0.978058	1.04608	1.02016	1.0219	1.07057	1.04275	1.05991	1.02703	1.02896	0.98758	0.997636	1.03448	1.0407	1.04819	1.03096	1.02522	1.01138	1.03544	1.01098	1.07063	1.03643	1.06165	1.0087	1.05221	1.03383	1.01296	1.00149	0.98836	1.03969	0.98103	1.0125	1.02908	1.0453	0.96059	0.992163	0.979672	0.980946	1.02667	1.01708
842	1.02537	1.00327	1.02499	1.03403	1.02128	0.998495	1.07244	1.03608	1.03638	1.0159	0.980628	1.01671	1.01888	1.02403	1.05818	1.02848	1.03554	1.02412	1.01773	0.985853	0.98901	1.03141	1.04288	1.04222	1.01589	1.02603	1.02207	1.03894	1.0116	1.06679	1.02988	1.04559	1.00588	1.04977	1.02172	1.02653	0.997444	0.980849	1.03889	0.976128	1.00841	1.0387	1.03273	0.971255	0.975133	0.983444	0.98695	1.0238	1.01155
844	1.02674	1.01567	1.03333	1.03366	1.01461	0.999462	1.07133	1.0293	1.03393	1.00401	0.972929	1.01889	1.00895	1.0278	1.04504	1.01627	1.0274	1.01737	1.01575	1.00154	0.989035	1.011	1.03661	1.04527	1.0075	1.02951	1.02338	1.02988	1.01406	1.06598	1.02552	1.03652	1.01618	1.04591	1.01188	1.03032	0.986061	0.981327	1.03614	0.971181	1.00171	1.0247	1.03716	0.969068	0.956554	0.982868	1.00164	1.02089	1.00802
846	1.01105	1.01959	1.04116	1.04628	1.00913	0.999788	1.06531	1.03244	1.03791	0.997501	0.974855	1.01664	1.00633	1.02366	1.02636	1.00189	1.02805	1.00347	1.0172	0.987776	0.98173	1.01058	1.02151	1.02741	1.00087	1.02774	1.03977	1.02767	1.0077	1.05367	1.03404	1.02295	1.01958	1.03898	1.00897	1.03819	0.988347	0.987478	1.0174	0.955794	1.00145	1.02255	1.02128	0.969944	0.95791	0.966791	1.00605	1.02096	1.01238
848	1.02224	1.02243	1.04924	1.03237	1.01395	1.01308	1.05948	1.01964	1.03528	1.00235	0.96434	1.01932	1.00344	1.01667	1.04038	0.985788	1.02799	1.00839	1.01964	0.986093	0.993332	1.00845	1.02005	1.02115	0.996558	1.02435	1.03215	1.03243	1.01198	1.04092	1.04575	1.02833	1.01123	1.03252	1.01182	1.03479	0.994703	0.995999	1.00946	0.963999	1.00399	1.03002	1.02397	0.967843	0.964207	0.966933	1.00466	1.04424	1.01112
850	1.01541	1.03438	1.05691	1.02124	1.0183	1.02781	1.05591	1.02237	1.04445	1.00787	0.958687	1.02086	1.01217	1.00506	1.03763	0.99457	1.03636	1.00339	1.02386	0.998283	0.986502	1.02224	1.03275	1.0299	0.994836	1.02555	1.03491	1.03153	1.01243	1.05526	1.03625	1.02067	1.00318	1.04223	1.01018	1.04054	1.00173	0.990724	1.01543	0.959071	1.01245	1.03254	1.02687	0.966099	0.968526	0.974812	1.00617	1.04605	1.01029
852	1.01668	1.05715	1.06105	1.02098	1.04155	1.03389	1.04977	1.01133	1.0412	1.01082	0.948588	1.05138	1.02257	1.00365	1.04447	1.00972	1.0423	1.01623	1.02799	0.990564	0.996741	1.02261	1.04468	1.03121	1.0055	1.02512	1.04903	1.03923	1.01709	1.05298	1.03702	1.0322	1.0119	1.04702	1.02034	1.03672	1.02099	1.00088	1.01315	0.953024	1.0215	1.03263	1.03707	0.976397	0.984545	0.985089	1.02933	1.07448	1.03324
854	1.03577	1.03377	1.05117	1.00829	1.04366	1.02797	1.04666	1.01524	1.02962	1.01471	0.950451	1.04842	1.0319	0.996114	1.04747	1.01175	1.04246	1.02234	1.03185	0.987553	0.989454	1.03028	1.05439	1.04208	1.00946	1.02364	1.04797	1.0377	1.01381	1.04056	1.03221	1.04043	1.01423	1.06777	1.03034	1.03598	1.02418	1.00987	0.991408	0.945809	1.03142	1.03671	1.02142	0.964407	0.988003	0.977839	1.01838	1.08489	1.03165
856	1.04059	1.02275	1.04286	0.988365	1.04691	1.02714	1.04597	1.01906	1.02478	1.02209	0.93349	1.0461	1.03192	0.990672	1.06485	1.01741	1.04249	1.03448	1.03677	1.01299	0.998957	1.02801	1.05392	1.04225	1.01911	1.01517	1.03579	1.03574	1.01033	1.03237	1.02832	1.04499	1.01416	1.06513	1.02737	1.03777	1.02014	1.00809	0.994256	0.961772	1.02785	1.04304	1.02692	0.975768	0.986884	0.975511	1.01378	1.0895	1.02883
858	1.02168	1.03011	1.04496	1.00871	1.03968	1.02258	1.03999	1.03087	1.03826	1.02974	0.944933	1.04869	1.02832	1.00121	1.05633	1.03651	1.06814	1.04227	1.02057	1.01367	1.00122	1.04343	1.05738	1.0492	1.02948	1.02416	1.04875	1.03279	1.00935	1.03638	1.03473	1.04482	1.01316	1.07811	1.05798	1.045	1.00656	1.01643	1.01271	0.97171	1.0299	1.03159	1.04146	0.999279	0.992684	0.978627	1.01733	1.07334	1.04494
860	1.02108	1.03547	1.04726	1.01978	1.05667	1.02832	1.04178	1.03844	1.03585	1.03158	0.957231	1.04311	1.02665	1.01805	1.0554	1.04188	1.0729	1.04354	1.02894	1.01473	1.01491	1.03578	1.04988	1.05402	1.03992	1.02903	1.04678	1.03759	1.00846	1.03096	1.031	1.04995	1.02208	1.07974	1.06838	1.04146	1.01778	1.03106	1.00828	0.957397	1.03334	1.03976	1.043	1.00046	0.990228	0.970341	1.02707	1.08874	1.0418
862	1.04975	1.03011	1.04429	1.01676	1.05375	1.04027	1.05286	1.03661	1.05932	1.03616	0.963996	1.03023	1.02821	1.02658	1.05544	1.03831	1.081	1.05008	1.03944	1.02608	1.01317	1.0413	1.05347	1.05199	1.0404	1.02989	1.03631	1.04562	1.01148	1.03885	1.04037	1.04088	1.01992	1.08143	1.04955	1.04661	1.01094	1.02588	1.02216	0.967951	1.03852	1.03782	1.03572	0.992621	0.999592	0.965701	1.01862	1.0626	1.03707
864	1.0527	1.04706	1.04445	1.02763	1.04962	1.04589	1.0611	1.03947	1.05609	1.04062	0.975459	1.03226	1.03602	1.02172	1.05996	1.02923	1.08093	1.04976	1.04478	1.021	1.02939	1.04743	1.0493	1.04655	1.04634	1.02645	1.03709	1.04589	1.01	1.04817	1.04676	1.0549	1.03097	1.06187	1.04417	1.04368	1.0228	1.0243	1.04021	0.973802	1.03747	1.04035	1.04722	1.00693	1.00205	0.988677	1.02749	1.06479	1.04907
866	1.04205	1.04432	1.04607	1.02702	1.0475	1.04976	1.06863	1.03529	1.05817	1.04706	0.994131	1.04971	1.04489	1.02882	1.05861	1.03434	1.09822	1.04893	1.04006	1.01822	1.02948	1.04958	1.05233	1.04775	1.04081	1.03831	1.03892	1.04742	1.02379	1.05862	1.05158	1.05246	1.02956	1.06925	1.05927	1.03015	1.02756	1.02873	1.04686	0.976345	1.05971	1.04337	1.05317	1.0155	0.997691	0.996212	1.03851	1.07748	1.06092
868	1.03111	1.03341	1.05625	1.01875	1.0465	1.05689	1.06701	1.02768	1.04955	1.03417	0.992366	1.04167	1.04389	1.03069	1.04751	1.0226	1.08097	1.04556	1.05628	1.01856	1.03374	1.04425	1.06383	1.03915	1.04049	1.03809	1.03565	1.04236	1.02506	1.05882	1.03903	1.0474	1.03533	1.05852	1.04991	1.02678	1.02698	1.02402	1.02897	0.969574	1.05835	1.03703	1.04659	0.998904	0.994104	0.989836	1.0357	1.07185	1.0501
870	1.03429	1.01985	1.04304	1.01084	1.03205	1.04827	1.0767	1.01276	1.04698	1.03235	0.991389	1.03985	1.04021	1.02414	1.06501	1.01643	1.06953	1.04598	1.0446	0.999268	1.02272	1.0301	1.05554	1.02822	1.03461	1.0364	1.01448	1.0431	1.03025	1.05298	1.01565	1.03363	1.03374	1.03939	1.04335	1.01383	1.01799	1.00484	1.03865	0.976946	1.04666	1.02506	1.0489	0.992452	0.993499	0.997277	1.03305	1.05582	1.05061
872	1.03104	1.01951	1.03857	1.0148	1.02143	1.0489	1.06795	1.00119	1.02732	1.02423	0.991105	1.03138	1.03385	1.01075	1.05141	1.01804	1.06695	1.03662	1.02828	0.983014	1.01654	1.03194	1.03696	1.02786	1.03554	1.04164	1.01477	1.02381	1.02385	1.05011	0.998767	1.03738	1.02865	1.02985	1.0584	1.01865	1.00622	1.01398	1.03022	0.965445	1.04306	1.02382	1.05607	1.00189	0.979932	1.00861	1.02478	1.06328	1.04876
874	1.02164	1.0119	1.04228	1.01398	1.02231	1.04987	1.06843	0.999323	1.03238	1.0155	0.973798	1.02726	1.02459	1.03145	1.04776	1.03098	1.06253	1.04401	1.02299	0.98894	0.992198	1.0225	1.0357	1.01573	1.02764	1.05228	1.01865	1.02967	1.02496	1.06166	0.990195	1.03022	1.0294	1.02647	1.05769	1.01038	1.0053	1.0184	1.03583	0.973784	1.04271	1.01914	1.0559	0.999109	0.986639	0.990179	1.02344	1.05059	1.04438
876	1.02546	1.00493	1.04184	1.02793	1.03225	1.05324	1.05639	1.01129	1.03622	1.00997	0.979425	1.00076	1.03809	1.02911	1.04996	1.02311	1.06382	1.05623	1.02431	0.994317	1.00185	1.02335	1.03907	1.02311	1.03115	1.04929	1.02944	1.02811	1.02664	1.06743	0.98274	1.01727	1.02763	1.0247	1.05024	1.00826	1.01012	1.018	1.04726	0.978266	1.04656	1.0084	1.05478	0.978063	1.00474	1.00313	1.02347	1.04144	1.03577
878	1.02473	1.00113	1.03693	1.0294	1.03892	1.0496	1.06557	1.01812	1.03196	1.00825	0.990921	1.00456	1.05187	1.02374	1.05923	1.03022	1.05725	1.04468	1.0219	0.983755	1.00636	1.0107	1.02998	1.0203	1.02779	1.06092	1.02994	1.02921	1.01797	1.0679	0.992461	1.0167	1.03084	1.02285	1.0318	1.00488	1.00672	1.00143	1.04073	0.970716	1.05079	1.02918	1.04825	0.986114	0.996741	1.00672	1.02224	1.05536	1.04255
880	1.0423	1.01701	1.05666	1.02287	1.03492	1.05482	1.08182	1.02372	1.04101	1.01328	0.996703	1.00693	1.06602	1.02856	1.05043	1.03539	1.06874	1.04134	1.04434	1.00693	1.02339	1.00691	1.04129	1.04077	1.03628	1.06056	1.04094	1.03904	1.01415	1.07235	1.03074	1.03131	1.03211	1.04279	1.04352	1.01046	1.01466	1.01795	1.03608	0.984548	1.06262	1.03457	1.06497	0.989175	1.00199	1.01769	1.02806	1.05551	1.03807
882	1.03239	1.00777	1.0647	1.02275	1.04079	1.0509	1.071	1.04501	1.04411	1.02237	0.990404	1.0038	1.06718	1.02221	1.06767	1.02876	1.07223	1.03705	1.05049	1.01551	1.01712	0.998417	1.04984	1.02804	1.02694	1.0578	1.02433	1.04176	1.02456	1.06676	1.04507	1.01776	1.03643	1.04495	1.04647	0.996607	1.02818	1.01228	1.02964	1.00009	1.06419	1.0322	1.05371	0.984086	0.999771	1.01527	1.0395	1.05181	1.03417
884	1.05703	1.00981	1.07303	1.02319	1.04445	1.0565	1.08122	1.03625	1.05568	1.02335	0.989258	1.01181	1.05467	1.00212	1.06947	1.02884	1.08247	1.03141	1.05233	1.00582	1.04608	1.00235	1.05987	1.0431	1.03059	1.05478	1.02654	1.04602	1.0295	1.05126	1.04943	1.0193	1.02266	1.04018	1.04253	1.01019	1.02781	1.01676	1.02708	1.00386	1.06692	1.0409	1.06076	0.981674	1.01149	1.02605	1.04298	1.05304	1.03559
886	1.02428	1.03429	1.06888	1.02526	1.04663	1.05904	1.07524	1.02299	1.05504	1.02286	0.992456	1.03318	1.0436	1.00749	1.05894	1.03959	1.07441	1.00117	1.04966	0.997247	1.02954	1.00178	1.05783	1.04722	1.02457	1.05044	1.02181	1.05677	1.03745	1.05022	1.04641	1.02907	1.02895	1.04622	1.04411	1.02767	1.01256	1.01627	1.02614	1.00231	1.06452	1.03961	1.0548	0.988563	1.0095	1.02608	1.04695	1.05924	1.03291
888	1.04249	1.03969	1.06105	1.02767	1.03689	1.06345	1.08088	1.02999	1.06467	1.03327	1.00454	1.0333	1.03312	1.01917	1.0583	1.03059	1.08722	1.01086	1.05452	1.00978	1.02728	1.01256	1.06651	1.04237	1.01757	1.04162	1.02135	1.07086	1.02537	1.05411	1.04176	1.04763	1.02269	1.0599	1.05135	1.03713	1.01862	1.01192	1.04781	1.01397	1.06225	1.04398	1.07075	0.992506	1.01676	1.02683	1.05818	1.05231	1.02985
890	1.04065	1.02905	1.0564	1.03747	1.04337	1.0522	1.05645	1.02758	1.06028	1.03419	0.994334	1.04015	1.02528	1.01234	1.0673	1.01931	1.07019	1.00896	1.05762	1.00154	1.03137	1.03429	1.05331	1.03176	1.00765	1.04765	1.0372	1.05781	1.02559	1.05687	1.0377	1.05111	1.0132	1.0497	1.03597	1.05196	1.01626	1.00293	1.04318	1.00677	1.06146	1.04387	1.06037	1.00212	1.02326	1.02038	1.05611	1.05131	1.03595
892	1.04372	1.03074	1.04493	1.04317	1.04032	1.05019	1.07733	1.0182	1.06499	1.03783	1.01399	1.04653	1.03506	1.02131	1.06475	1.02582	1.08788	1.01383	1.0503	1.01356	1.04597	1.03632	1.05232	1.05213	1.01681	1.04183	1.0538	1.05173	1.01944	1.06556	1.03347	1.06655	1.008	1.03727	1.02704	1.05101	1.01004	1.00765	1.04199	1.00506	1.05529	1.04595	1.06379	1.00427	1.02059	1.02222	1.04642	1.05616	1.03472
894	1.03537	1.03214	1.03442	1.04106	1.03861	1.04544	1.06168	1.02928	1.06318	1.0441	1.02373	1.04783	1.03042	1.02505	1.05831	1.02865	1.08238	1.02535	1.04116	1.02944	1.03006	1.03504	1.06253	1.05755	1.02234	1.03604	1.03978	1.04154	1.0073	1.06693	1.02385	1.05871	1.0013	1.04985	1.02492	1.05128	1.00884	1.00938	1.03001	1.00577	1.04314	1.03798	1.06628	1.00276	1.01775	1.0104	1.05011	1.07171	1.02972
896	1.03265	1.0228	1.04403	1.04463	1.0247	1.04917	1.07749	1.03492	1.06916	1.05711	1.03028	1.05317	1.03204	1.02268	1.0652	1.02441	1.06713	1.05002	1.04884	1.02596	1.04798	1.04475	1.05935	1.04213	1.03282	1.03995	1.04215	1.04501	1.00215	1.06206	1.03308	1.0676	0.999781	1.05018	1.02299	1.05114	1.01392	1.00786	1.04109	1.00919	1.02811	1.03786	1.07651	1.0224	1.01673	1.0042	1.04495	1.06552	1.03818
898	1.02908	1.03199	1.05717	1.03474	1.03399	1.03809	1.06557	1.03939	1.065	1.04332	1.01856	1.06052	1.03628	1.00311	1.07757	1.04863	1.06097	1.05573	1.05561	1.01697	1.0495	1.052	1.05251	1.06082	1.03117	1.02784	1.05692	1.05422	1.01949	1.06738	1.03043	1.05701	0.998984	1.04756	1.01722	1.04239	1.02053	1.0301	1.04028	1.00483	1.03645	1.02453	1.07278	1.00861	1.01559	1.00751	1.04968	1.06492	1.03309
900	1.05026	1.02305	1.04644	1.03036	1.02536	1.04454	1.06969	1.02978	1.05873	1.03175	1.01722	1.05634	1.01898	0.996747	1.06409	1.05309	1.06267	1.06118	1.03615	1.00471	1.04024	1.05381	1.06137	1.05586	1.02593	1.02567	1.03877	1.04886	1.01314	1.04966	1.01963	1.04101	1.01365	1.04374	1.01526	1.01685	1.02475	1.03345	1.0429	1.01009	1.03666	1.01795	1.05847	1.00267	1.02026	1.0068	1.04976	1.05052	1.02621
902	1.05029	1.01928	1.04927	1.02134	1.03255	1.04228	1.05534	1.03842	1.04578	1.0394	1.00887	1.06017	1.0067	0.991749	1.05737	1.0469	1.03658	1.05726	1.02817	1.00321	1.03301	1.06125	1.06432	1.05418	1.0315	1.03682	1.04171	1.06428	1.01471	1.04466	1.01036	1.04471	1.01338	1.04895	1.01885	1.02054	1.02951	1.03793	1.04851	1.018	1.04153	1.02573	1.06807	0.995934	1.0304	0.991938	1.0655	1.04492	1.02237
904	1.02536	1.00965	1.05763	1.02795	1.03606	1.02948	1.05027	1.03724	1.04247	1.03167	1.01299	1.05471	1.03039	0.987648	1.05581	1.04556	1.03095	1.04231	1.03557	0.992299	1.03575	1.05897	1.03606	1.05329	1.02229	1.04385	1.05626	1.06893	1.02159	1.05459	1.01394	1.03956	1.02508	1.05431	1.02818	1.01866	1.03284	1.01812	1.05537	1.01701	1.0394	1.03264	1.06691	0.994766	1.0357	1.01222	1.05481	1.0241	1.02633
906	1.03365	0.999309	1.04438	1.00833	1.03521	1.0118	1.05255	1.0237	1.02845	1.01436	0.995298	1.03921	1.02159	0.986536	1.05503	1.03938	1.03218	1.04897	1.03109	0.987544	1.02732	1.04954	1.04071	1.0541	1.0056	1.04493	1.04484	1.05686	1.0089	1.06273	1.00933	1.03254	1.02017	1.04915	1.01523	1.01279	1.03162	1.02007	1.04495	1.01864	1.04707	1.0387	1.06157	0.982779	1.03846	1.00757	1.05614	1.03011	1.02571
908	1.02967	0.99404	1.03839	1.01238	1.0353	1.01723	1.05425	1.00676	1.02441	1.02295	0.995955	1.03222	1.01869	1.00691	1.04287	1.00999	1.03155	1.0436	1.00937	0.99838	1.02617	1.03484	1.03035	1.0479	0.999921	1.05795	1.03114	1.03678	1.00382	1.06869	1.01923	1.03354	1.0166	1.04132	1.01499	1.0031	1.01366	1.00725	1.03119	1.00431	1.03954	1.02843	1.05587	0.980496	1.04634	0.998691	1.03923	1.0285	1.0282
910	1.02652	1.00434	1.04079	1.02204	1.04144	1.01834	1.05894	1.03189	1.02922	1.03708	0.997335	1.04055	1.02751	1.01624	1.03174	1.01825	1.03175	1.04768	1.01179	1.01054	1.02893	1.04378	1.03596	1.05723	1.00001	1.05954	1.03158	1.04091	1.01474	1.07671	1.02067	1.04137	1.01363	1.04365	1.01881	1.02307	1.03052	1.00524	1.02831	0.995715	1.03521	1.02615	1.06107	0.997532	1.03982	1.00211	1.05163	1.05539	1.03438
912	1.02428	0.999992	1.04303	1.02443	1.04395	1.02892	1.06406	1.02273	1.04651	1.02227	0.994712	1.03915	1.03954	1.03302	1.04561	1.02736	1.04052	1.04498	1.01771	1.01238	1.03011	1.05645	1.02536	1.05122	0.994934	1.05352	1.02281	1.02415	1.00235	1.08363	1.01684	1.04104	1.01858	1.05253	1.01379	1.02607	1.0351	1.00128	1.01923	0.991667	1.02478	1.00871	1.05519	1.00012	1.04419	1.01103	1.0501	1.06259	1.04692
914	1.04364	1.00842	1.0391	1.02588	1.04865	1.02833	1.07504	1.02369	1.05863	1.02996	1.00196	1.05276	1.04327	1.04105	1.04362	1.03203	1.05528	1.04268	1.0284	1.01743	1.03606	1.06729	1.04942	1.04652	1.00482	1.06085	1.04163	1.03268	1.00919	1.09061	1.02268	1.05134	1.01937	1.05218	1.0173	1.03601	1.03535	1.02455	1.02066	0.997336	1.02286	1.00714	1.05993	0.999292	1.02927	0.999039	1.05216	1.07387	1.03351
916	1.03607	1.01873	1.05287	1.03681	1.06013	1.03978	1.07223	1.03046	1.08024	1.04679	1.00878	1.06881	1.04983	1.04978	1.04574	1.02389	1.06578	1.03954	1.03096	1.02332	1.03219	1.06977	1.05971	1.05706	1.00209	1.06937	1.05754	1.03814	1.01948	1.0932	1.04071	1.04885	1.03396	1.05326	1.03342	1.0374	1.05288	1.02774	1.00981	1.00363	1.02493	1.01243	1.05939	1.0077	1.0366	1.00389	1.05158	1.07821	1.04288
918	1.05139	1.02358	1.05079	1.04944	1.04784	1.04585	1.09143	1.04778	1.08053	1.04735	1.00381	1.07914	1.04278	1.04723	1.05731	1.04628	1.06899	1.04838	1.03768	1.03454	1.0362	1.08437	1.06961	1.07212	1.01965	1.0613	1.06565	1.04165	1.02919	1.09323	1.0392	1.0632	1.04576	1.06585	1.0462	1.04743	1.07133	1.04649	1.02687	1.02563	1.03361	1.02945	1.06525	1.02341	1.02574	1.01175	1.05948	1.08533	1.0516
920	1.04929	1.02467	1.04931	1.04095	1.0331	1.04404	1.07414	1.03824	1.0732	1.03327	1.00487	1.07513	1.03609	1.03992	1.05914	1.04504	1.07229	1.03823	1.03603	1.03127	1.03265	1.07229	1.05811	1.06635	1.03699	1.06009	1.07483	1.03685	1.01647	1.09199	1.03367	1.06903	1.04084	1.07776	1.035	1.05477	1.05769	1.0412	1.03182	1.03459	1.03683	1.04502	1.06126	1.01943	1.0286	1.00303	1.03973	1.07391	1.05466
922	1.0621	1.04088	1.06071	1.03803	1.02089	1.04151	1.07087	1.04307	1.06306	1.02585	1.00999	1.06472	1.02582	1.03261	1.05335	1.04121	1.07838	1.0395	1.04631	1.04222	1.04139	1.05265	1.06715	1.07167	1.03922	1.06837	1.08094	1.04267	1.02092	1.08191	1.04449	1.07225	1.04138	1.07368	1.03637	1.03941	1.04631	1.03101	1.04095	1.02224	1.03209	1.05609	1.05949	1.01398	1.03334	1.00639	1.03057	1.07457	1.05434
924	1.03293	1.03035	1.06436	1.03383	1.0115	1.04008	1.06443	1.03889	1.0514	1.02683	0.999029	1.0561	1.01921	1.027	1.04689	1.03087	1.07117	1.05235	1.02111	1.04136	1.04827	1.04422	1.05418	1.0759	1.03064	1.06189	1.06533	1.03521	1.01636	1.06065	1.04049	1.06549	1.04856	1.07719	1.03523	1.02322	1.0375	1.01453	1.03504	1.0117	1.05141	1.07642	1.05492	1.02886	1.03425	1.00443	1.03693	1.07403	1.07737
926	1.03601	1.02563	1.06319	1.04404	1.01515	1.03678	1.07098	1.05315	1.0345	1.02679	1.00602	1.04997	1.02377	1.02496	1.04782	1.04388	1.07109	1.04803	1.02418	1.04001	1.04849	1.06105	1.04669	1.0715	1.0427	1.06101	1.04892	1.04166	1.0291	1.05856	1.03595	1.07164	1.04002	1.07648	1.04084	1.02835	1.02255	1.00979	1.05778	0.998952	1.05851	1.06965	1.05052	1.03519	1.02333	1.00555	1.03226	1.06614	1.07021
928	1.03736	1.0162	1.05919	1.03126	1.0225	1.02857	1.04635	1.0481	1.04097	1.01923	1.0089	1.03578	1.02183	1.01691	1.04079	1.03368	1.07161	1.04111	1.02018	1.01505	1.04213	1.04983	1.0469	1.04992	1.0486	1.06537	1.03943	1.04435	1.02258	1.04153	1.03909	1.05976	1.03592	1.06485	1.02426	1.02694	1.02122	0.998077	1.03332	0.975947	1.04513	1.04343	1.03883	1.02863	1.02103	0.997725	1.03483	1.06431	1.05477
930	1.05402	1.00927	1.05848	1.03982	1.03327	1.02569	1.05618	1.05097	1.03717	1.02553	1.014	1.03183	1.04117	1.01968	1.04338	1.03736	1.06713	1.04251	1.01865	1.01111	1.05028	1.05593	1.05228	1.04807	1.04113	1.05594	1.04375	1.04961	1.02801	1.04055	1.04077	1.04422	1.0421	1.067	1.02899	1.00994	1.01521	0.999632	1.03402	0.971042	1.03634	1.02648	1.03151	1.0189	1.01683	1.00396	1.04222	1.06519	1.04659
932	1.02963	1.01387	1.0632	1.05077	1.05278	1.01876	1.05211	1.0404	1.03595	1.02678	1.01866	1.04766	1.05338	1.01082	1.03916	1.03598	1.07231	1.04713	1.00971	0.987093	1.0424	1.06146	1.05994	1.04142	1.05636	1.05013	1.04442	1.04543	1.03348	1.04531	1.04528	1.03793	1.04656	1.07759	1.02466	1.02509	1.02159	1.00646	1.04416	0.969792	1.05236	1.02498	1.03348	1.03146	1.01027	0.995017	1.05158	1.0626	1.04466
934	1.03326	1.03282	1.05037	1.04063	1.054	1.02431	1.05581	1.03144	1.03821	1.0034	1.01848	1.03974	1.0603	1.01618	1.04543	1.03899	1.06168	1.03271	1.02332	0.976914	1.02806	1.04833	1.07012	1.04036	1.06036	1.04135	1.03849	1.04304	1.01991	1.04811	1.04863	1.03233	1.04121	1.06681	1.00939	1.00989	1.00712	1.00348	1.05544	0.965261	1.0423	1.00063	1.0128	1.02906	1.00704	0.999309	1.04147	1.05652	1.02608
936	1.04477	1.03975	1.04466	1.03864	1.05578	1.02661	1.04925	1.0212	1.03242	0.991441	1.01355	1.03382	1.04991	1.00934	1.03883	1.04751	1.06426	1.0229	1.00689	0.983447	1.03043	1.0344	1.0778	1.03536	1.0531	1.03586	1.05376	1.03802	1.00543	1.03537	1.0385	1.03234	1.0473	1.05735	0.996293	1.01152	1.02531	1.00721	1.03989	0.978999	1.02879	0.995092	1.02013	1.01432	1.0161	0.999432	1.04491	1.04732	1.03441
938	1.0133	1.05653	1.04834	1.03847	1.05477	1.04262	1.06092	1.02966	1.02407	0.994303	1.02145	1.03873	1.05524	1.01228	1.03849	1.05074	1.06335	1.01819	1.03236	0.992862	1.03882	1.02791	1.0839	1.04554	1.03876	1.02724	1.05812	1.03327	1.01427	1.0438	1.03066	1.03096	1.05458	1.05391	1.00881	1.01079	1.02263	1.01937	1.0563	0.992159	1.02345	1.0134	1.03839	1.02048	1.03127	1.01463	1.05702	1.05214	1.04837
940	1.04476	1.06475	1.04762	1.04407	1.05465	1.04885	1.06862	1.02098	1.03648	1.01043	1.02577	1.04333	1.04131	1.01039	1.0462	1.03916	1.06558	1.02229	1.03859	0.997257	1.03426	1.02171	1.08019	1.04637	1.03325	1.03263	1.04691	1.03685	1.02576	1.03999	1.03544	1.03492	1.05614	1.04817	1.02984	1.02649	1.01494	1.01672	1.06007	0.999234	1.03	1.02064	1.0514	1.01402	1.03025	1.01463	1.05728	1.05484	1.05204
942	1.04419	1.06678	1.028	1.03586	1.03593	1.05432	1.079	1.03665	1.0387	1.01563	1.02403	1.03946	1.02947	1.00935	1.04145	1.0347	1.04549	1.0257	1.04021	1.00309	1.04315	1.03032	1.06783	1.03783	1.00007	1.02277	1.03984	1.0445	1.02232	1.05039	1.03381	1.02408	1.05697	1.03737	1.04028	1.02129	1.00353	1.00646	1.04692	1.01435	1.02776	1.0176	1.04959	1.01139	1.02113	1.00914	1.0542	1.0405	1.05337
944	1.04614	1.05536	1.02659	1.04444	1.04303	1.05244	1.08199	1.04282	1.03535	1.02637	1.03215	1.057	1.01337	1.00529	1.04527	1.0332	1.05516	1.02946	1.05688	1.01049	1.03925	1.03451	1.05916	1.03381	0.995824	1.03186	1.03541	1.03632	1.0314	1.03943	1.03314	1.02266	1.04842	1.03477	1.0538	1.04691	1.01199	1.01295	1.03584	1.03463	1.03137	1.00512	1.05734	1.0108	1.03394	1.01446	1.06134	1.04259	1.06582
946	1.03216	1.05027	1.02476	1.04146	1.03779	1.04446	1.08862	1.04545	1.04874	1.02858	1.03639	1.06181	1.01509	1.01097	1.04121	1.03166	1.05557	1.0332	1.07724	1.00949	1.03996	1.03241	1.05068	1.0489	1.00498	1.02408	1.02487	1.03812	1.02418	1.04569	1.02899	1.03472	1.04886	1.04058	1.05304	1.04106	0.994159	1.00437	1.03751	1.01572	1.03456	1.00124	1.05855	1.01473	1.02399	1.02478	1.0602	1.04174	1.04099
948	1.02803	1.0317	1.01376	1.0504	1.04449	1.02955	1.08882	1.03399	1.05538	1.0431	1.02415	1.05906	1.01253	1.00705	1.03493	1.03079	1.05822	1.03239	1.06323	1.00395	1.04137	1.04775	1.05208	1.04802	1.01724	1.03004	1.02917	1.05226	1.01471	1.05583	1.02942	1.02176	1.04458	1.03873	1.06261	1.04367	0.997853	0.996291	1.02823	1.01014	1.04761	0.990097	1.04973	1.00535	1.01787	1.01239	1.0488	1.02132	1.03072
950	1.04142	1.02151	1.02004	1.06308	1.05101	1.03575	1.07587	1.05718	1.05688	1.03861	1.02556	1.05005	1.03187	1.01809	1.03087	1.04337	1.06489	1.03849	1.06214	1.00893	1.04484	1.04911	1.05042	1.06063	1.01771	1.03354	1.03232	1.05112	1.00521	1.07125	1.03073	1.02068	1.0408	1.04855	1.04401	1.03107	0.999276	1.00344	1.01955	1.00956	1.06187	0.994531	1.04905	1.0089	1.01996	1.01063	1.05235	1.0339	1.03867
952	1.04331	1.01863	1.02041	1.06174	1.06095	1.04126	1.07687	1.05817	1.05711	1.04628	1.02371	1.05005	1.02371	1.02997	1.03078	1.05316	1.08108	1.03641	1.06587	1.0143	1.03611	1.03457	1.04162	1.07474	1.04625	1.042	1.03605	1.05185	1.01171	1.06439	1.0401	1.02858	1.02912	1.05081	1.04811	1.02599	1.01646	1.01297	1.02589	1.01437	1.0575	0.998027	1.06358	0.995636	1.03289	1.02692	1.06118	1.05092	1.04161
954	1.06104	1.02605	1.027	1.07246	1.05531	1.06325	1.06933	1.06719	1.06552	1.05833	1.02112	1.04349	1.03305	1.03032	1.02444	1.05347	1.07937	1.0499	1.04911	1.01575	1.03034	1.04522	1.04998	1.08152	1.03572	1.0381	1.04129	1.06217	1.0181	1.09207	1.05894	1.04596	1.03425	1.05454	1.05279	1.02039	1.02448	1.01973	1.03609	1.00914	1.06719	1.01962	1.07034	1.00112	1.031	1.02142	1.06802	1.05774	1.03102
956	1.05397	1.02628	1.02249	1.08201	1.06847	1.07608	1.06196	1.06842	1.0641	1.05775	1.01847	1.03344	1.03545	1.02572	1.03379	1.04971	1.06793	1.0518	1.04156	1.01498	1.03631	1.04936	1.0549	1.07607	1.04607	1.0423	1.04371	1.05854	1.02689	1.09618	1.0622	1.03486	1.02171	1.05748	1.04404	1.0158	1.03164	1.02198	1.02958	1.02302	1.0559	1.03227	1.06392	1.00325	1.03216	1.0097	1.08041	1.06576	1.04602
958	1.04683	1.03202	1.03992	1.06705	1.07304	1.09014	1.06269	1.08114	1.07686	1.04692	1.02775	1.04676	1.03902	1.02883	1.0442	1.05971	1.05858	1.05861	1.04664	1.02624	1.03316	1.04883	1.05555	1.0811	1.04416	1.03354	1.03558	1.05318	1.03407	1.06782	1.05841	1.04833	1.01878	1.0678	1.03457	1.02036	1.02913	1.01834	1.0397	1.0298	1.05422	1.03096	1.0557	1.00938	1.04258	1.01531	1.07615	1.08142	1.04992
960	1.04879	1.03821	1.04051	1.05894	1.07283	1.07669	1.07164	1.07103	1.07143	1.04624	1.02442	1.05452	1.02659	1.02634	1.05795	1.05851	1.04786	1.05905	1.03269	1.01834	1.01866	1.0441	1.05835	1.06907	1.04356	1.03722	1.03326	1.05911	1.0292	1.06275	1.06016	1.04792	1.01535	1.07349	1.04536	1.04728	1.04132	1.01962	1.04601	1.03293	1.04271	1.02924	1.06235	1.01225	1.04667	1.02911	1.07125	1.06223	1.04838
962	1.05564	1.04272	1.04749	1.06196	1.06717	1.07496	1.0753	1.06794	1.07485	1.04749	1.02819	1.05016	1.04882	1.03347	1.07016	1.05352	1.04934	1.05877	1.04273	1.01372	1.02338	1.05442	1.07713	1.07452	1.032	1.04598	1.03516	1.07078	1.03639	1.06136	1.05858	1.04926	1.0264	1.07646	1.03449	1.07502	1.04401	1.0219	1.05615	1.03198	1.04376	1.03418	1.0575	1.02168	1.05276	1.0248	1.06951	1.06372	1.04585
964	1.05105	1.03564	1.04509	1.04708	1.08077	1.06579	1.07961	1.05408	1.06475	1.04109	1.03488	1.05177	1.04314	1.03872	1.08755	1.05152	1.04934	1.04793	1.04435	1.02581	1.03638	1.05943	1.0737	1.07449	1.04252	1.04688	1.02725	1.06458	1.04121	1.05855	1.04161	1.028	1.02274	1.07436	1.02721	1.08253	1.0426	1.01297	1.04823	1.03333	1.0329	1.0171	1.05736	1.01317	1.03933	1.02958	1.0549	1.06272	1.05297
966	1.06465	1.03248	1.04397	1.03538	1.05827	1.05962	1.07159	1.04486	1.05699	1.04005	1.03453	1.04634	1.04423	1.02251	1.08925	1.05621	1.0589	1.05431	1.03979	1.03311	1.03416	1.0585	1.06243	1.06076	1.02358	1.04337	1.01383	1.05777	1.03296	1.05095	1.03998	1.01719	1.03183	1.07213	1.03138	1.08218	1.03614	1.00977	1.05173	1.02592	1.0403	1.02287	1.04392	1.00632	1.04885	1.03143	1.05026	1.06081	1.05314
968	1.03562	1.04238	1.04555	1.05066	1.05443	1.04217	1.06082	1.02986	1.04848	1.03978	1.04482	1.02674	1.04186	1.0195	1.08844	1.05019	1.06761	1.05153	1.02382	1.04393	1.03116	1.05896	1.05707	1.048	1.0188	1.04716	1.00838	1.04231	1.02676	1.07709	1.03933	1.01915	1.03387	1.06354	1.0218	1.07379	1.03075	1.01863	1.03673	1.03477	1.03284	1.02854	1.04115	1.00343	1.0309	1.03582	1.04934	1.06597	1.05612
970	1.02816	1.02671	1.03067	1.042	1.03644	1.04389	1.05847	1.00585	1.04098	1.03061	1.0329	1.0193	1.03317	1.01379	1.07689	1.03888	1.06548	1.04143	1.02327	1.0501	1.02756	1.04629	1.05525	1.04282	1.02112	1.0401	0.988757	1.03749	1.02743	1.06248	1.02596	1.02738	1.0411	1.04013	1.00614	1.05021	1.01566	1.01394	1.02523	1.03287	1.0372	1.01716	1.03466	0.993715	1.00958	1.00987	1.04851	1.07393	1.04113
972	1.038	1.01984	1.02406	1.04703	1.03744	1.03976	1.05104	1.00656	1.033	1.02898	1.03398	1.0277	1.01774	1.00708	1.0678	1.043	1.0573	1.04294	1.01468	1.05823	1.03076	1.05509	1.05992	1.0371	1.01873	1.03745	0.993154	1.03421	1.02024	1.06334	1.01972	1.0402	1.03983	1.03148	1.02421	1.03654	0.992205	1.00428	1.02112	1.02366	1.04205	1.00954	1.03774	0.98412	0.992696	0.999199	1.03999	1.05483	1.04499
974	1.01354	1.02173	1.0393	1.05955	1.04206	1.02759	1.0522	1.00515	1.04008	1.03709	1.02626	1.02039	1.02283	1.01022	1.05696	1.04984	1.06885	1.04706	1.00569	1.05265	1.03481	1.04452	1.06794	1.02338	1.02963	1.04657	1.01153	1.03377	1.03093	1.05952	1.02343	1.06286	1.04702	1.04244	1.0211	1.03983	0.998278	1.00374	1.025	1.01203	1.04021	1.02841	1.04512	0.986007	0.994143	0.99936	1.05382	1.04892	1.04756
976	1.03943	1.02225	1.0442	1.05852	1.06016	1.03731	1.05366	1.02069	1.04688	1.04181	1.02819	1.03736	1.03286	1.03782	1.05432	1.05584	1.07098	1.04442	0.99999	1.05662	1.03716	1.05005	1.05951	1.0364	1.0361	1.06145	1.02693	1.04435	1.04693	1.0822	1.03782	1.07343	1.0549	1.04668	1.05201	1.04677	1.02223	1.01971	1.03338	1.00992	1.04401	1.0307	1.06763	1.00379	1.00242	1.00646	1.05064	1.0663	1.04809
978	1.03672	1.01606	1.03083	1.04104	1.06247	1.0468	1.05014	1.04023	1.0402	1.02965	1.01669	1.05178	1.03035	1.03682	1.04995	1.03368	1.06474	1.04446	1.0005	1.04042	1.03713	1.04007	1.06134	1.04193	1.03669	1.06125	1.03285	1.04638	1.05345	1.06601	1.03551	1.06144	1.04758	1.04055	1.0593	1.04712	1.03165	1.00269	1.04097	1.00472	1.07199	1.02921	1.07827	1.0035	1.00962	1.01512	1.05629	1.05545	1.05069
980	1.06973	1.03283	1.03297	1.03268	1.08564	1.04187	1.05163	1.04821	1.05098	1.0352	1.02579	1.04655	1.03374	1.03413	1.04532	1.03468	1.06067	1.04955	1.00272	1.04462	1.05475	1.05666	1.07236	1.05026	1.02912	1.05934	1.05671	1.04409	1.05578	1.08572	1.0491	1.06137	1.03038	1.04289	1.06514	1.04477	1.03255	1.00462	1.03981	0.99988	1.06778	1.05278	1.07341	1.01139	1.0199	1.02687	1.05581	1.04255	1.05471
982	1.02707	1.02304	1.03176	1.02855	1.08246	1.03754	1.04708	1.0459	1.05381	1.03902	1.02716	1.03549	1.03657	1.03115	1.04097	1.02648	1.05873	1.03818	0.99825	1.04086	1.03761	1.04617	1.05323	1.04732	1.02845	1.04038	1.04004	1.01384	1.06408	1.07972	1.04479	1.04043	1.01973	1.05272	1.03923	1.04916	1.03772	1.01105	1.03079	1.00136	1.06638	1.06708	1.06093	1.01805	1.02334	1.04001	1.04734	1.04597	1.0558
984	1.02633	1.02411	1.02171	1.03222	1.08187	1.04868	1.04324	1.05328	1.05171	1.0342	1.02949	1.03143	1.02729	1.02352	1.04828	1.02562	1.04886	1.03575	1.01251	1.04906	1.03663	1.05204	1.04844	1.0545	1.02	1.03792	1.0299	1.01393	1.04763	1.06864	1.05192	1.03249	1.01419	1.05114	1.04461	1.04931	1.02691	1.02747	1.03568	1.00751	1.06094	1.06506	1.06135	1.00877	1.03698	1.03468	1.04469	1.06093	1.05142
986	1.02795	1.02332	1.02158	1.01484	1.05704	1.03047	1.05702	1.03228	1.04458	1.01961	1.01922	1.02672	1.00551	1.00203	1.05193	1.00066	1.0298	1.01987	1.01001	1.02663	1.01457	1.03821	1.06033	1.0438	1.01008	1.01674	1.03188	1.01439	1.03507	1.05157	1.03796	1.02082	0.993091	1.03732	1.02071	1.03279	1.00257	1.02086	1.02174	1.01634	1.05701	1.05574	1.0377	0.992658	1.02076	1.02404	1.02929	1.02847	1.04286
988	1.04124	1.00544	1.01234	1.02199	1.03838	1.02059	1.05379	1.01246	1.03633	1.02637	1.01017	1.01443	1.00321	0.995721	1.05047	1.01988	1.03071	1.02294	1.00858	1.02431	1.00844	1.03971	1.05477	1.038	0.983664	1.01519	1.02889	1.01808	1.02826	1.05739	1.0415	1.02815	0.986035	1.03999	1.00686	1.02998	0.994392	1.02278	1.00905	1.00873	1.03065	1.04891	1.04315	0.990544	1.01499	0.999703	1.03969	1.02719	1.02862
990	1.00937	0.999615	1.01904	1.02787	1.03256	1.03779	1.04298	1.0131	1.02714	1.03083	1.01418	1.02376	1.00681	1.0055	1.04815	1.03193	1.04646	1.03619	1.01996	1.02455	0.998986	1.03233	1.05407	1.03156	0.985035	1.01292	1.02204	1.01639	1.02485	1.05668	1.04316	1.02664	0.997812	1.0471	1.00248	1.0246	1.01256	1.02496	1.02312	1.01122	1.02562	1.04123	1.05009	0.996472	1.02733	1.00546	1.04649	1.03789	1.03986
992	1.01958	1.00474	1.0174	1.02715	1.03184	1.03432	1.04922	1.00681	1.02527	1.01263	0.997207	1.02364	1.00679	0.992902	1.0498	1.0311	1.04377	1.04484	1.02617	1.02437	1.00785	1.02925	1.07365	1.01771	0.991658	1.02229	1.03305	1.03138	1.01247	1.05528	1.04076	1.04141	1.01364	1.05403	1.01133	1.02167	1.02212	1.01757	1.0229	1.00498	1.0195	1.02035	1.05434	0.994809	1.03337	1.01097	1.04666	1.04784	1.02233
994	1.04929	0.991379	1.00384	1.01534	1.02362	1.02426	1.04616	1.00303	1.02134	1.00812	0.988986	1.02342	1.01435	0.999453	1.03279	1.03739	1.04585	1.0414	1.02655	1.00373	1.00361	1.01405	1.06892	1.0194	0.992839	1.00571	1.0291	1.03926	1.00303	1.05111	1.04329	1.03276	1.02696	1.04313	1.00228	1.00999	1.03314	1.00326	1.00754	1.00249	1.02566	1.00751	1.0471	0.996546	1.01925	1.01022	1.05086	1.03115	1.02132
996	1.0307	0.988734	1.00753	1.02113	1.03847	1.02757	1.03104	1.0122	1.02562	1.02785	0.982589	1.01628	1.02692	1.00215	1.01564	1.05893	1.05937	1.051	1.02365	1.01058	1.0092	1.01539	1.07677	1.02266	1.00283	1.00426	1.02612	1.02891	1.00412	1.05255	1.04919	1.03965	1.02893	1.05594	0.998687	1.03036	1.03523	0.990347	1.01248	0.98145	1.02889	1.00801	1.06877	0.999179	1.02811	1.01194	1.06263	1.04688	1.01806
998	1.02159	1.01922	1.01777	1.02907	1.06388	1.03185	1.04667	1.02326	1.0396	1.04085	0.987464	1.01747	1.02955	1.00942	1.03463	1.05435	1.05501	1.05761	1.03353	1.03667	1.01363	1.01131	1.08151	1.03639	1.03406	1.01072	1.02292	1.03546	1.0108	1.05761	1.05503	1.04123	1.03723	1.0615	1.00947	1.04431	1.04778	0.997004	1.03105	0.996124	1.03874	1.0167	1.0527	1.00585	1.05321	1.02064	1.06384	1.07122	1.02455
1000	1.02692	1.01801	1.00689	1.02211	1.05042	1.02202	1.05529	1.02541	1.04122	1.02152	0.977685	1.01233	1.0231	1.00046	1.02616	1.03931	1.03329	1.0359	1.02582	1.02199	1.00974	1.01536	1.07439	1.02224	1.0411	1.01533	1.0315	1.02678	1.00689	1.04635	1.04819	1.0242	1.02847	1.04232	1.00843	1.05043	1.02939	0.990098	1.01557	0.999303	1.03332	1.00375	1.03062	0.992003	1.03618	1.023	1.06319	1.07124	1.00914
1002	1.05265	1.00981	1.00735	1.03192	1.0492	1.04421	1.06458	1.03327	1.03613	1.03398	0.986973	1.01566	1.03151	1.01625	1.04055	1.04149	1.04467	1.04723	1.02356	1.02543	1.01819	1.03125	1.05607	1.03378	1.03852	1.01939	1.03072	1.03676	1.014	1.05808	1.05044	1.01824	1.02447	1.02481	1.01752	1.05263	1.03687	1.00079	1.01425	1.0165	1.03198	1.01886	1.02968	1.00608	1.03097	1.01412	1.07874	1.06435	1.01128
1004	1.01177	1.03157	1.00767	1.02821	1.04041	1.06063	1.0664	1.03818	1.04445	1.03863	0.998079	1.01932	1.01324	1.0164	1.05107	1.02206	1.04138	1.04425	1.03123	1.04056	1.02411	1.04836	1.05367	1.03342	1.03871	1.02927	1.03493	1.03275	1.01144	1.07402	1.04271	1.03062	1.01521	1.01806	1.02164	1.05376	1.01469	1.01425	1.02003	1.01838	1.03173	1.01932	1.02581	1.00495	1.05031	0.998995	1.08048	1.06709	1.0107
1006	1.04885	1.02825	0.998033	1.02079	1.02231	1.06043	1.06168	1.04225	1.04253	1.02882	1.01063	1.01813	1.00401	1.00853	1.07005	0.999288	1.02365	1.04563	1.03339	1.05121	1.02439	1.05432	1.04034	1.02506	1.03631	1.03758	1.0247	1.02788	1.00631	1.07066	1.04199	1.0344	1.02126	1.01141	1.0344	1.03951	1.01533	1.02013	1.01284	1.0278	1.02601	1.01311	1.00985	0.999084	1.03494	1.00423	1.07836	1.05787	1.01904
1008	1.03128	1.00108	0.995728	1.01624	1	1.04832	1.05728	1.03671	1.03595	1.01119	1.00312	1.0266	1.00429	0.996741	1.04859	0.995857	1.02957	1.03065	1.0071	1.02416	1.01074	1.05786	1.03443	1.01358	1.03071	1.02951	1.01617	1.01929	0.995543	1.06058	1.02639	1.02648	1.01574	1.00508	1.02835	1.03541	0.990473	1.01497	0.997054	1.00652	1.02277	1.00873	1.01365	0.986549	1.02558	1.00547	1.06829	1.02992	1.00595
1010	1.01287	1.01157	1.01626	1.03261	1.00314	1.04756	1.05717	1.0389	1.04119	1.03404	1.00958	1.03154	1.01209	1.00585	1.0686	0.990979	1.04986	1.02988	1.01388	1.03119	1.01493	1.05814	1.03909	1.01069	1.03576	1.03004	1.01162	1.03104	1.00409	1.06311	1.01979	1.04303	1.01751	1.02204	1.0312	1.03947	0.988206	1.01624	1.00949	0.999215	1.0273	1.01639	1.02934	0.99387	1.04543	0.994433	1.05441	1.02798	1.01737
1012	1.00819	1.01753	1.0212	1.01473	0.990571	1.01932	1.03868	1.0307	1.04683	1.03092	0.996647	1.03791	1.0033	1.00007	1.06258	1.00249	1.04119	1.00608	1.00491	1.02001	1.00821	1.03994	1.03832	1.00102	1.03307	1.01886	1.01379	1.0249	0.999919	1.05129	1.01157	1.04671	1.01692	1.02406	1.03029	1.03902	0.987603	0.998992	0.997895	0.985323	1.02949	1.01843	1.02977	0.97936	1.04194	0.987321	1.04251	1.03786	1.02118
1014	1.03706	1.00263	1.0192	1.02188	1.00368	1.01128	1.03615	1.02478	1.04068	1.04334	0.995664	1.04027	1.01493	0.994911	1.06626	1.0157	1.03069	0.99846	0.976365	1.01625	0.999016	1.04966	1.02425	0.994272	1.01911	1.01009	1.01529	1.02889	1.00335	1.04131	1.00238	1.04064	1.01414	1.02878	1.02808	1.03657	1.00101	0.990015	0.999779	0.979756	1.02539	1.02633	1.03461	0.97662	1.03597	0.993035	1.03645	1.04336	1.03135
1016	1.02486	1.00411	1.02021	1.03564	1.02341	1.00159	1.04379	1.01921	1.04554	1.04749	0.995997	1.04534	1.01546	1.00992	1.04988	1.03071	1.04168	0.999218	0.975444	1.00365	1.00944	1.05555	1.02262	1.00096	1.01341	0.996748	1.01445	1.04117	1.00601	1.03556	0.997469	1.03575	1.02274	1.03143	1.01182	1.04244	0.997556	0.994966	1.00354	0.979829	1.01582	1.02742	1.04809	0.983628	1.04197	0.990149	1.03448	1.05099	1.02492
1018	1.02576	1.01307	1.0232	1.02954	1.0298	1.02243	1.03534	1.01735	1.04914	1.05875	1.00574	1.04062	1.02269	1.01885	1.0456	1.03731	1.02653	1.01611	1.00517	0.999588	1.02781	1.04879	1.02602	1.0075	1.00278	1.01024	1.03283	1.04063	1.00976	1.03804	1.00623	1.03723	1.0389	1.04082	1.01952	1.037	1.00876	1.01157	1.02513	0.99347	1.01404	1.03656	1.04614	0.991493	1.02466	0.98587	1.03251	1.05529	1.03405
1020	1.02771	0.998734	1.00695	1.01091	1.03899	1.01137	1.02844	1.00507	1.04176	1.05199	0.991667	1.03409	1.01079	1.01266	1.03525	1.03068	1.02719	1.0141	1.00611	0.994063	1.02819	1.04574	1.01406	1.02901	1.00108	1.01171	1.02395	1.03449	1.00843	1.0449	1.01195	1.02704	1.03508	1.01919	1.01632	1.04011	1.01507	1.0216	1.01715	1.00263	1.01665	1.02936	1.03785	0.981408	1.00105	0.982746	1.04327	1.05636	1.02259
1022	1.02903	0.997658	1.00802	1.01415	1.06055	1.02912	1.03333	1.01136	1.03872	1.06439	0.993886	1.02458	1.01561	1.02574	1.02885	1.01913	1.03205	1.01955	1.01045	1.00339	1.03555	1.05581	1.01122	1.01741	1.00007	1.01682	1.02101	1.03781	0.999216	1.05995	1.0157	1.01302	1.0261	1.02437	1.00389	1.03566	1.01198	1.03816	1.02714	0.999925	1.0182	1.01891	1.03577	0.989598	1.00424	0.977458	1.04592	1.05046	1.02874
1024	1.01435	1.01211	1.01811	1.00868	1.06364	1.03119	1.03787	1.01844	1.04713	1.05285	0.987905	1.02631	1.02961	1.02313	1.02689	1.02547	1.04969	1.02501	1.02479	1.00305	1.04386	1.04539	1.02611	1.02061	1.02088	1.03203	1.02272	1.0498	1.01971	1.06648	1.01704	1.00793	1.03377	1.02354	1.01	1.04523	1.01659	1.03954	1.0241	1.02106	1.0186	1.02449	1.03571	0.994744	1.00116	0.983639	1.05056	1.05766	1.01906
1026	1.02811	1.02101	1.02357	1.01073	1.05666	1.04825	1.04022	1.01962	1.03832	1.05135	0.995153	1.02168	1.02513	1.01878	1.03713	1.01966	1.06716	1.03051	1.02835	1.01215	1.04644	1.03455	1.03007	1.02956	1.02291	1.04244	1.03041	1.04628	1.01387	1.07591	1.02373	1.01213	1.02837	1.03317	1.02094	1.05075	1.03662	1.05228	1.02856	1.02691	1.02747	1.02875	1.03091	1.00017	1.00578	0.992376	1.05764	1.05541	1.01406
1028	1.04314	1.02304	1.03076	1.01165	1.06187	1.03703	1.04676	1.02272	1.0373	1.05912	1.01143	1.0247	1.03002	1.01418	1.04779	1.025	1.08963	1.00509	1.02462	1.02483	1.03906	1.05329	1.04306	1.02671	1.03662	1.03498	1.03111	1.05479	1.01738	1.0684	1.03179	1.02504	1.02878	1.02244	1.02903	1.05632	1.03385	1.03158	1.02144	1.0163	1.03879	1.02828	1.03557	1.00866	1.02401	0.996422	1.05947	1.05801	1.01692
1030	1.03403	1.03184	1.04604	1.00606	1.05597	1.04607	1.04745	1.02301	1.0368	1.06031	1.00462	1.02189	1.04061	1.0039	1.05753	1.03468	1.08373	1.01338	1.01306	1.02694	1.04279	1.04907	1.04699	1.02463	1.02761	1.03119	1.03834	1.06062	1.02116	1.07221	1.02491	1.02282	1.04406	1.03755	1.02845	1.05466	1.03262	1.02766	1.01915	1.00726	1.03798	1.04407	1.04396	1.0215	1.03723	1.01453	1.04373	1.05825	1.0309
1032	1.03953	1.03861	1.0264	1.0161	1.04506	1.03578	1.04566	1.01264	1.0437	1.03916	1.02291	1.01643	1.03714	0.989627	1.05617	1.02518	1.08014	1.01478	1.00826	1.0205	1.02141	1.04096	1.0575	1.03527	1.02231	1.03815	1.03814	1.05406	1.03771	1.05748	1.03043	1.03805	1.04955	1.03494	1.02329	1.04068	1.01719	1.00517	1.02985	1.00183	1.03409	1.04448	1.04581	1.00828	1.03428	1.02481	1.03562	1.06139	1.0247
1034	1.02595	1.03182	1.02076	1.01767	1.02929	1.01656	1.0367	1.02275	1.03529	1.03626	1.02155	1.01511	1.02033	0.979661	1.05072	1.00527	1.08381	1.02395	1.01112	1.00233	1.01487	1.05386	1.04825	1.03467	1.01446	1.01927	1.02767	1.04485	1.01324	1.05728	1.03361	1.02239	1.03628	1.03686	1.01852	1.02444	1.01684	0.99703	1.03477	0.979343	1.02744	1.04195	1.03132	1.00928	1.0444	1.02201	1.01086	1.04493	1.03231
1036	1.01965	1.02092	1.00914	1.00457	1.02968	1.00658	1.02458	1.01	1.03223	1.02698	1.01291	1.01149	1.02635	0.977581	1.03421	1.00971	1.06759	1.01207	1.01751	1.00449	1.01206	1.04942	1.04729	1.02418	1.01971	1.01603	1.02698	1.03284	1.02555	1.04773	1.02156	1.01073	1.03107	1.02895	1.00629	1.01844	1.00413	0.977286	1.01947	0.971314	1.03046	1.04349	1.02708	1.00108	1.04322	1.01344	1.00593	1.0519	1.03296
1038	1.01351	1.01299	1.00994	1.01189	1.03554	1.01114	1.03804	1.00487	1.02524	1.01142	1.00087	1.01305	1.01246	0.991653	1.02369	1.00997	1.05231	1.0222	1.01475	0.999286	1.01777	1.04892	1.03887	1.03217	1.01056	1.01457	1.02096	1.03692	1.02061	1.05644	1.01477	0.984436	1.02168	1.0322	0.998238	1.01534	1.00906	0.992453	1.02091	0.97257	1.02392	1.04492	1.01843	0.995081	1.03839	1.00593	0.998257	1.05796	1.03522
1040	1.01761	1.01476	0.996028	1.02488	1.04111	1.00321	1.02874	1.01048	1.02946	1.00573	1.00879	1.02093	1.00576	1.0005	1.01622	1.01053	1.04296	1.01642	1.00428	1.01971	1.0181	1.05782	1.04356	1.02909	1.00936	1.03323	1.01943	1.03326	1.01641	1.0495	1.0167	0.996734	1.02012	1.04387	1.00239	1.0208	1.01558	0.992341	1.03282	0.969019	1.02284	1.03255	1.0183	0.995004	1.0443	0.988466	1.01073	1.04939	1.02826
1042	1.02059	1.01314	1.00383	1.02138	1.03877	1.00089	1.02938	1.02281	1.02207	1.01462	1.00034	1.02628	1.00909	0.999313	1.02034	1.01714	1.04088	1.01344	1.01277	1.01586	1.03477	1.07616	1.03531	1.02524	1.00924	1.02785	1.02319	1.03823	1.0026	1.0493	1.01229	0.986516	1.01424	1.0437	1.01269	1.02496	1.03416	1.00958	1.01645	0.977633	1.036	1.03018	1.00554	1.00457	1.04773	0.992346	1.00876	1.04973	1.01901
1044	1.02598	1.01318	1.02006	1.0297	1.03532	1.00653	1.03574	1.00877	1.01412	1.00011	1.01459	1.01157	1.02649	1.00512	1.02507	1.03336	1.02454	1.01762	1.01253	1.02211	1.03688	1.06103	1.04417	1.01722	1.00321	1.03964	1.03031	1.03034	0.999623	1.0375	0.999223	1.01484	1.01661	1.0339	1.01077	1.03533	1.03111	1.00583	1.00763	0.978491	1.04857	1.02663	1.01305	1.01	1.03998	0.992275	1.0103	1.05145	1.01241
1046	1.0234	1.01493	1.02402	1.037	1.0366	1.01398	1.03899	1.02358	1.01981	0.997715	1.00417	1.01101	1.02993	1.00927	1.04483	1.03342	1.02714	1.01863	1.0168	1.01153	1.02478	1.05943	1.04577	1.03066	1.00368	1.03671	1.02718	1.03769	1.0021	1.04384	0.995741	1.0287	1.01953	1.03165	1.01931	1.02711	1.0369	1.00723	1.01449	0.994167	1.04766	1.01216	1.01673	1.00426	1.04536	0.985307	0.998919	1.03905	1.02137
1048	1.01518	1.0261	1.02875	1.03715	1.03643	1.03082	1.0261	1.03196	1.01551	1.0138	1.00908	1.02548	1.03899	1.00424	1.04399	1.03283	1.02849	1.02086	1.0133	1.01182	1.01749	1.04371	1.05446	1.03015	1.01246	1.04676	1.03983	1.03391	1.00426	1.05561	0.998981	1.04791	1.02229	1.04389	1.02788	1.03228	1.05824	1.00383	1.00155	1.0165	1.0371	1.00934	1.02778	1.00475	1.0379	1.00432	1.00788	1.03259	1.02152
1050	1.01368	1.02039	1.02922	1.04412	1.03872	1.04272	1.04729	1.03886	1.00381	1.01272	1.0026	1.02238	1.05282	1.00544	1.04275	1.03864	1.0458	1.03059	1.0294	1.0022	1.02757	1.04819	1.05825	1.02055	1.01615	1.03727	1.03622	1.03378	1.01877	1.04317	0.997537	1.04876	1.01362	1.02663	1.02495	1.02174	1.055	0.99432	0.993547	1.02408	1.02973	1.00887	1.02964	1.0059	1.02866	1.0137	1.00458	1.04309	1.02766
1052	1.05716	1.0154	1.04687	1.03755	1.04082	1.05384	1.05189	1.02399	1.00482	1.01331	1.01839	1.02432	1.04882	1.00827	1.0367	1.0397	1.05241	1.04687	1.03773	1.01035	1.02365	1.03144	1.06242	1.03645	1.02335	1.03195	1.03341	1.03327	1.02044	1.04143	0.997901	1.05243	1.02881	1.02292	1.02069	1.02183	1.04346	0.993613	1.0027	1.02652	1.02102	1.01438	1.04581	1.0039	1.03189	1.0154	1.00531	1.04769	1.03667
1054	1.03479	1.01873	1.04212	1.03369	1.04501	1.06196	1.06099	1.03282	1.01105	1.02995	1.01191	1.04306	1.04436	1.01341	1.03609	1.05027	1.05164	1.04197	1.04193	1.00872	1.02192	1.01915	1.0532	1.04471	1.02713	1.02551	1.03849	1.03293	1.04192	1.05119	1.01689	1.04154	1.03827	1.02138	1.02945	1.03304	1.04411	0.995626	1.00519	1.04389	1.02042	1.01572	1.04591	1.00076	1.03395	1.01935	1.01728	1.037	1.04583
1056	1.02609	1.01766	1.03285	1.04007	1.04378	1.05142	1.07349	1.03123	1.01596	1.03409	1.03487	1.05483	1.05523	1.00838	1.02363	1.03526	1.05591	1.05313	1.03497	1.00583	1.03465	1.02616	1.05391	1.04127	1.02818	1.03917	1.04882	1.0331	1.04832	1.06053	1.02703	1.0412	1.03239	1.02749	1.03068	1.04341	1.04442	1.00449	1.01115	1.03752	1.01875	1.02588	1.06046	1.0067	1.02195	1.02489	1.03486	1.04036	1.0427
1058	1.03751	1.01626	1.01971	1.02973	1.04512	1.02753	1.08337	1.0257	1.02612	1.02325	1.03231	1.04097	1.04252	1.00405	1.03079	1.03153	1.05553	1.05584	1.02668	0.999271	1.03459	1.02757	1.03992	1.0337	1.02002	1.03411	1.03968	1.02397	1.05137	1.06072	1.0279	1.04026	1.02384	1.02111	1.01755	1.03511	1.03189	0.990244	1.02581	1.0215	1.03406	1.0242	1.05952	0.999862	1.03042	1.0016	1.02876	1.0349	1.04077
1060	1.02359	1.0193	1.01488	1.01947	1.03738	1.02702	1.07324	1.02613	1.03606	1.0279	1.04358	1.05132	1.03568	0.98925	1.04458	1.04025	1.04676	1.04416	1.03559	0.986889	1.02057	1.01714	1.03566	1.03876	1.02185	1.00975	1.04241	1.02073	1.03669	1.06887	1.03053	1.03298	1.02207	1.03076	1.02153	1.03349	1.0389	1.0032	1.03333	1.01462	1.03545	1.02694	1.05621	0.981636	1.02866	0.996224	1.02897	1.0211	1.03516
1062	1.03246	1.02218	1.00907	1.02649	1.0343	1.01626	1.07262	1.04079	1.03953	1.02529	1.02572	1.05517	1.02177	1.00631	1.0523	1.04849	1.04089	1.02753	1.03855	0.99034	1.02389	1.00882	1.03831	1.03545	1.02876	1.01394	1.04306	1.02023	1.03793	1.06922	1.01079	1.02898	1.01665	1.03044	1.02213	1.03542	1.03736	1.00513	1.03064	1.01025	1.03958	1.02345	1.05319	0.988422	1.01956	0.99385	1.03465	1.01967	1.05677
1064	1.01762	1.0115	0.991712	1.01309	1.04175	1.01835	1.07087	1.03631	1.03963	1.02608	1.03761	1.05894	1.00853	0.998556	1.06187	1.03227	1.04453	1.02425	1.02976	1.01309	1.0237	1.02351	1.03776	1.02324	1.04056	1.02644	1.03344	1.01717	1.03655	1.06845	1.01093	1.03165	1.00792	1.04998	1.02487	1.01953	1.03723	1.01669	1.03338	1.01126	1.03291	1.0123	1.05242	0.988159	1.00816	1.00606	1.03626	1.03238	1.0457
1066	1.03138	1.01679	1.01555	1.01539	1.03652	1.01964	1.07197	1.0384	1.02766	1.0433	1.03072	1.06001	1.00224	1.00641	1.0681	1.0364	1.04978	1.02123	1.0228	1.0166	1.02341	1.0406	1.03192	1.02256	1.03083	1.02026	1.03355	1.01992	1.0295	1.0768	1.01262	1.04051	1.01385	1.0423	1.02122	1.01772	1.03477	1.02515	1.03106	1.00905	1.04322	1.00811	1.04679	0.996081	1.00844	1.01392	1.03317	1.03648	1.0516
1068	1.02772	1.02266	1.01616	1.00455	1.033	1.01554	1.07924	1.0264	1.02408	1.04341	1.02178	1.0537	1.00448	0.994798	1.06828	1.02224	1.0584	1.01396	1.03125	1.0225	1.02371	1.03976	1.02987	1.03094	1.03471	1.01604	1.02072	1.02504	1.02907	1.06623	0.998778	1.04452	1.01491	1.03601	1.02412	1.02049	1.01833	1.0383	1.0282	1.00924	1.0319	1.00488	1.04954	0.999935	0.990831	1.02298	1.04025	1.03928	1.06293
1070	1.04275	1.01838	1.02031	0.989274	1.02156	1.00666	1.07834	1.0293	1.03776	1.03645	1.02825	1.04496	0.998934	1.01031	1.0486	1.01166	1.0597	1.01575	1.02132	1.03314	1.02784	1.05604	1.03267	1.03418	1.03813	1.03102	1.03376	1.03	1.02807	1.05471	1.00204	1.03501	1.01963	1.02997	1.0222	1.01212	1.01019	1.03349	1.02088	1.00416	1.04292	1.00086	1.04378	1.0151	0.988071	1.01697	1.03732	1.04477	1.06106
1072	1.01683	1.01479	1.02471	0.988301	1.03435	1.00753	1.08031	1.02699	1.03822	1.04066	1.02774	1.0431	1.00667	0.994786	1.04907	1.0166	1.05861	1.02912	1.00485	1.02643	1.03786	1.06813	1.02911	1.03324	1.02503	1.03389	1.03044	1.03215	1.02378	1.06072	1.01827	1.03938	1.02636	1.02865	1.02223	1.01226	1.00567	1.03637	1.01612	0.979421	1.04846	1.00367	1.0278	0.994121	0.988104	1.00995	1.03797	1.0409	1.03245
1074	1.00997	1.02055	1.03328	0.982326	1.00966	1.00516	1.07222	1.01815	1.03557	1.04793	1.00759	1.02886	1.00533	1.00507	1.0376	1.01942	1.06229	1.01696	1.00967	1.00411	1.02796	1.05771	1.0321	1.04878	1.00415	1.0198	1.03417	1.0401	1.01516	1.06103	1.01933	1.03856	1.03454	1.00911	1.01282	1.00756	1.00727	1.0246	1.00981	0.955966	1.04153	1.01054	1.01641	0.990115	0.986063	1.00077	1.03687	1.0239	1.03403
1076	1.02091	1.02708	1.02553	0.979249	1.02067	1.02043	1.05989	1.02683	1.046	1.04305	1.00811	1.01805	0.986659	0.997665	1.02767	1.02195	1.06639	1.02076	1.01467	1.02458	1.03012	1.0493	1.03786	1.04104	1.01146	1.03195	1.03121	1.0385	1.01008	1.04093	1.01232	1.04666	1.03627	1.01607	1.01297	1.0065	1.00271	1.01751	1.0072	0.953681	1.04081	1.01536	1.00689	0.975268	0.990193	0.995088	1.04392	1.02516	1.03701
1078	1.00236	1.01991	1.03716	0.984957	1.01888	1.028	1.04702	1.04212	1.04455	1.03792	1.006	1.01837	0.987873	1.0022	1.02716	1.03314	1.05916	1.02321	1.00666	1.02687	1.04425	1.04556	1.05009	1.03258	1.01003	1.03373	1.0504	1.03949	1.01719	1.04039	1.01208	1.04487	1.04649	1.02054	1.00883	1.00218	1.00408	1.01244	1.00146	0.945624	1.05371	1.00941	0.996926	0.96807	1.00604	0.989324	1.03709	1.02216	1.01486
1080	1.03311	1.01469	1.03745	1.0066	1.03165	1.02982	1.05478	1.02016	1.02019	1.03478	0.999835	1.01991	0.975553	1.0058	1.03504	1.03922	1.05919	1.02299	1.00093	1.02016	1.038	1.02451	1.03828	1.03164	0.999881	1.02799	1.03942	1.022	1.01829	1.05	1.02447	1.04925	1.03346	1.0207	0.99989	1.00938	0.99868	1.014	1.00503	0.951775	1.05979	1.01664	0.99865	0.968728	1.0088	0.987494	1.03977	1.03514	1.00728
1082	1.02498	1.01994	1.03055	0.994514	1.03475	1.03645	1.04721	0.999286	1.02044	1.03268	1.00833	1.01332	0.979117	1.01076	1.03991	1.01829	1.06569	1.02281	1.02162	1.01479	1.01814	1.01709	1.02534	1.02417	1.00822	1.02334	1.04175	1.01361	1.01929	1.04163	1.02475	1.04101	1.03706	1.01599	0.997347	1.01973	1.01467	0.995596	1.00954	0.979163	1.04001	1.00756	1.01179	0.98522	1.01567	0.997179	1.03056	1.03687	1.02081
1084	1.0065	1.00688	1.03404	1.0072	1.04824	1.04326	1.04303	1.00236	1.02899	1.02648	1.00644	1.0137	0.999489	0.998263	1.03241	1.01661	1.04993	1.0286	1.02682	1.02304	1.0398	1.01845	1.03175	1.02855	1.0236	1.0165	1.04064	1.00741	1.02192	1.0452	1.01014	1.03798	1.03035	1.03468	0.990419	1.03565	1.01555	0.9953	1.01101	0.991708	1.05006	1.01082	1.02358	0.987999	1.01923	0.993507	1.02987	1.05057	1.02543
1086	1.0225	0.999949	1.03069	1.01585	1.0431	1.03414	1.04367	0.987086	1.04023	1.02427	1.0066	1.01925	1.02174	0.998609	1.04651	1.02623	1.02984	1.02713	1.03415	1.01312	1.0432	1.01259	1.04116	1.03984	1.0268	1.01526	1.03233	1.00591	1.02155	1.05895	1.02185	1.01291	1.02213	1.03662	0.987999	1.03508	1.02355	0.99365	1.01408	1.00941	1.05282	1.01468	1.03586	1.0099	1.02077	1.00249	1.02186	1.05247	1.02619
1088	1.02051	0.998816	1.02421	1.02659	1.04087	1.04282	1.04273	0.974072	1.04488	1.04619	1.01411	1.01586	1.02679	1.00297	1.05051	1.018	1.03235	1.01905	1.04671	1.02634	1.03169	1.02085	1.02908	1.04665	1.03032	1.01382	1.02748	1.00666	1.01061	1.05634	1.03892	1.00642	1.01602	1.04512	0.985541	1.03784	1.02285	1.00185	1.01242	1.01753	1.04964	1.01971	1.04283	1.01938	1.01326	1.00624	1.02851	1.06576	1.02236
1090	1.04162	1.00069	1.03509	1.02001	1.0385	1.04357	1.04255	0.990626	1.06461	1.03597	1.0147	1.01932	1.05361	1.01356	1.05247	1.00634	1.01814	1.02614	1.04829	1.02667	1.03861	1.03351	1.04181	1.04773	1.04637	1.0336	1.02761	1.03054	1.00548	1.05296	1.02648	1.01741	1.03018	1.05669	0.993155	1.0435	1.02402	0.994742	1.00132	1.03126	1.0356	1.02146	1.05842	1.02411	1.02173	1.01928	1.02858	1.0592	1.03012
1092	1.032	0.988138	1.03956	1.02716	1.03727	1.04746	1.04021	1.01632	1.06612	1.03633	1.00679	1.02095	1.05516	1.00902	1.04424	1.01872	1.01899	1.02012	1.02471	1.03853	1.04924	1.04017	1.07431	1.04886	1.05348	1.04249	1.03361	1.03393	1.01917	1.0497	1.02654	1.03044	1.01393	1.0704	0.98594	1.03756	1.00353	1.00179	1.00396	1.02596	1.04653	1.01602	1.0586	1.01878	1.03692	1.0057	1.05242	1.05636	1.01834
1094	1.03627	0.985764	1.03548	1.03351	1.04591	1.03531	1.04255	1.02411	1.05146	1.02775	1.0088	1.0293	1.03798	1.02715	1.05265	1.01243	1.01636	1.01971	1.01336	1.02958	1.0275	1.04621	1.08262	1.03744	1.04766	1.05787	1.02978	1.04128	1.01069	1.03466	1.03727	1.03636	1.02067	1.05687	0.999285	1.03662	1.01159	1.01858	1.006	1.01915	1.04383	1.00961	1.05435	1.01171	1.0435	1.0024	1.06411	1.06444	1.02416
1096	1.03224	0.986394	1.04748	1.02057	1.03694	1.03329	1.04949	1.02279	1.03123	1.02467	0.991609	1.02716	1.03099	1.03271	1.04344	0.99779	1.02384	1.0064	1.00014	1.02191	1.01803	1.03101	1.07674	1.01554	1.03104	1.04799	1.02939	1.04373	1.00723	1.03064	1.02653	1.03455	1.03425	1.03943	0.999323	1.03654	0.99822	1.016	0.994278	0.999279	1.02451	1.00128	1.04224	0.997067	1.0339	0.97975	1.06167	1.05959	1.0206
1098	1.02276	0.982887	1.05266	1.01551	1.0318	1.02047	1.04547	1.02425	1.02703	1.00587	0.991902	1.04306	1.02534	1.03515	1.04527	0.996996	1.01926	1.01477	0.995375	1.009	1.02189	1.03197	1.07878	1.00573	1.0277	1.03779	1.02317	1.051	1.00706	1.03562	1.02811	1.03385	1.03015	1.03209	0.996332	1.03172	1.00627	1.00169	1.00007	1.00115	1.01597	1.00123	1.04557	0.977628	1.03424	0.981107	1.05467	1.04205	1.0245
1100	1.00796	0.99356	1.03475	1.00675	1.03799	1.03399	1.05189	1.02279	1.02669	1.02493	0.986868	1.03582	1.00686	1.025	1.04327	0.99837	1.0296	1.01574	0.992682	0.992608	1.0242	1.02423	1.07234	1.00496	1.02453	1.02707	1.02032	1.0382	1.01374	1.04136	1.01744	1.0335	1.02739	1.01692	0.99723	1.02822	1.01973	1.00293	1.02281	1.00676	1.01242	0.990326	1.02763	0.977029	1.02991	0.972831	1.04996	1.05087	1.03388
[truncated: 205 more columns]
