# Supplementary material for: Membrane-mediated dimerization potentiates PIP5K lipid kinase activity
Source: eLife. 2022 Aug 17;11:e73747. doi: 10.7554/eLife.73747 (PMC9470164; doi:10.7554/eLife.73747)
Supplement: Figure 7—source data 3. [file elife-73747-fig7-data3.xlsx]

## Sheet: Figure 7E
Figure 7E
[OCRL], µM	5KB	5KB (D51R)
9	6	0
6	28	0
4.5	44	0
3.75	48	6
3	56	60
2.25	93	93
1.5	97	99
	Probability of reaction being won by 5KB (WT or D51R) to reach steady-state enriched in PIP2 lipids
