# Supplementary figures and images for: Membrane-mediated dimerization potentiates PIP5K lipid kinase activity
Source: eLife journal article supplement (doi:10.7554/elife.73747), 2022-08-17

Figure 1–figure supplement 1

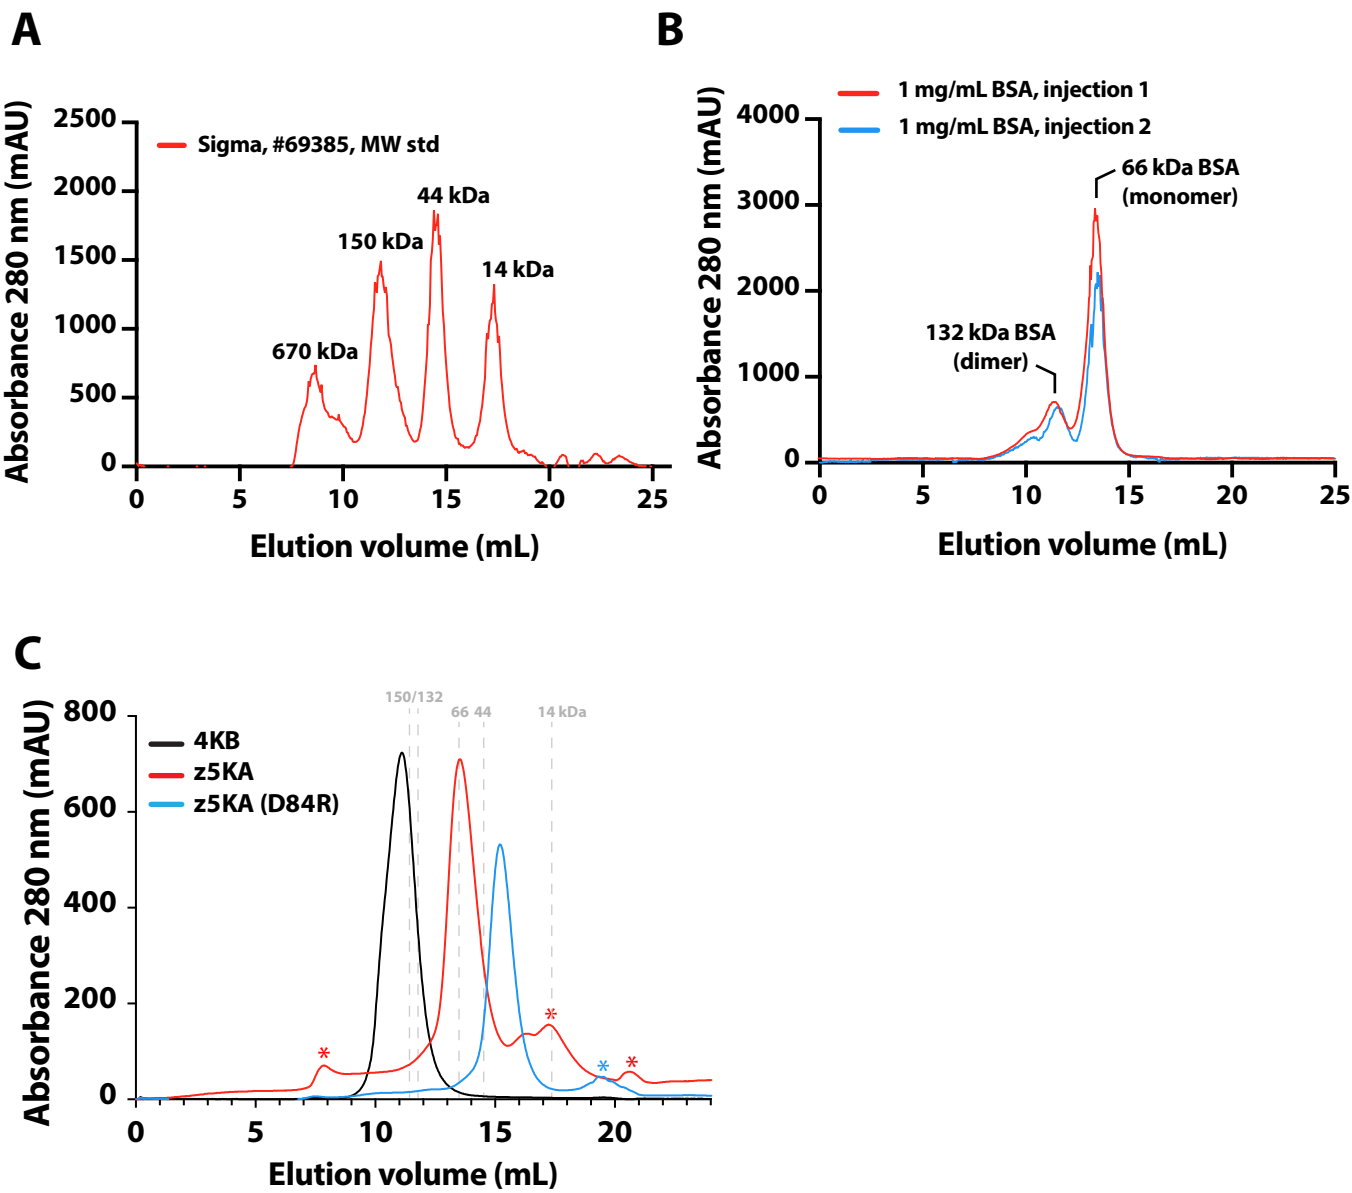

Supplement: supp [file elife_poa_e73747_Figure_1_figure_supplement_1.pdf › elife_poa_e73747_Figure_1_figure_supplement_1.pdf]

# Figure 1–figure supplement 2

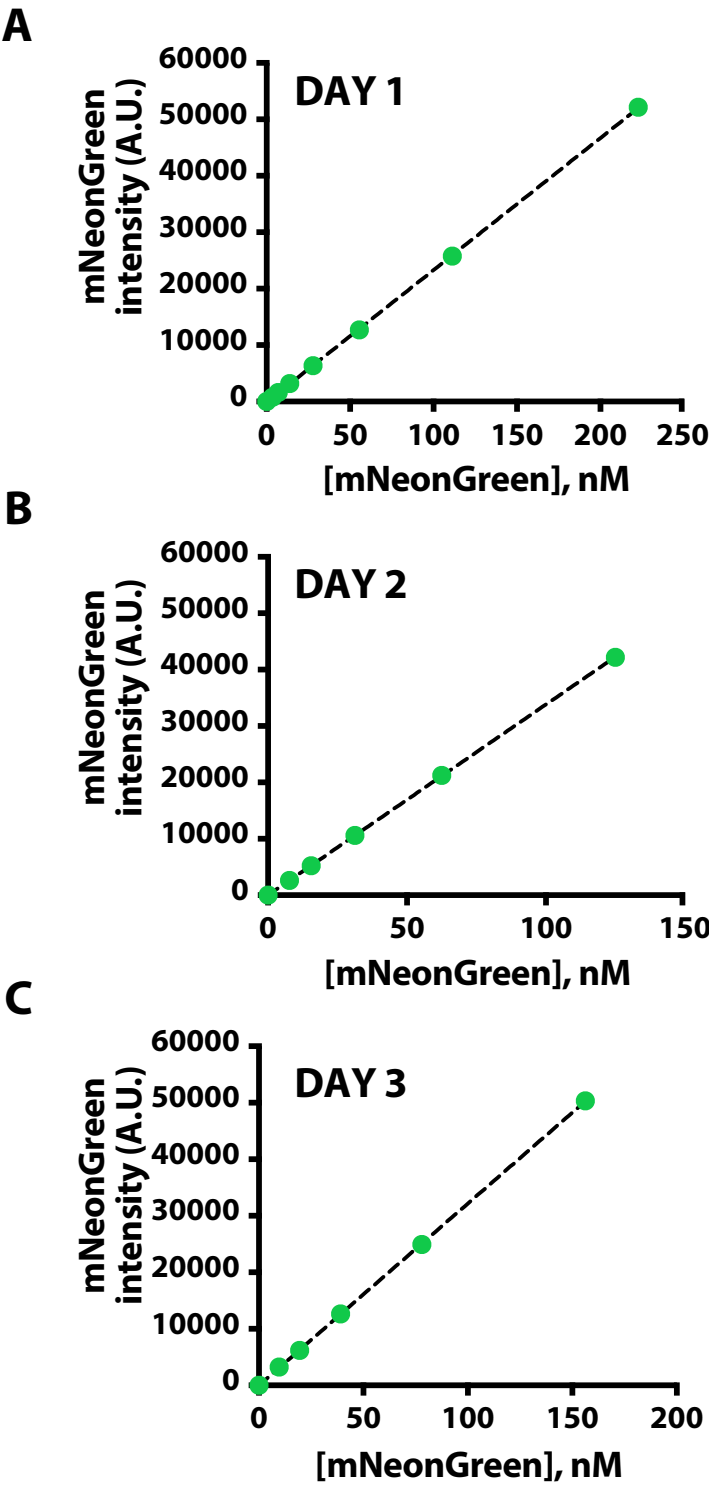

Supplement: supp [file elife_poa_e73747_Figure_1_figure_supplement_2.pdf › elife_poa_e73747_Figure_1_figure_supplement_2.pdf]

Figure 1–figure supplement 3

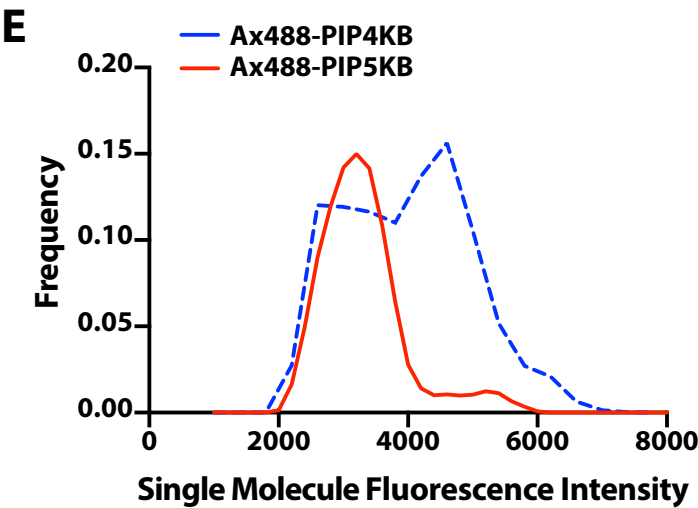

Supplement: supp [file elife_poa_e73747_Figure_1_figure_supplement_3.pdf › elife_poa_e73747_Figure_1_figure_supplement_3.pdf]

Figure 1–figure supplement 4

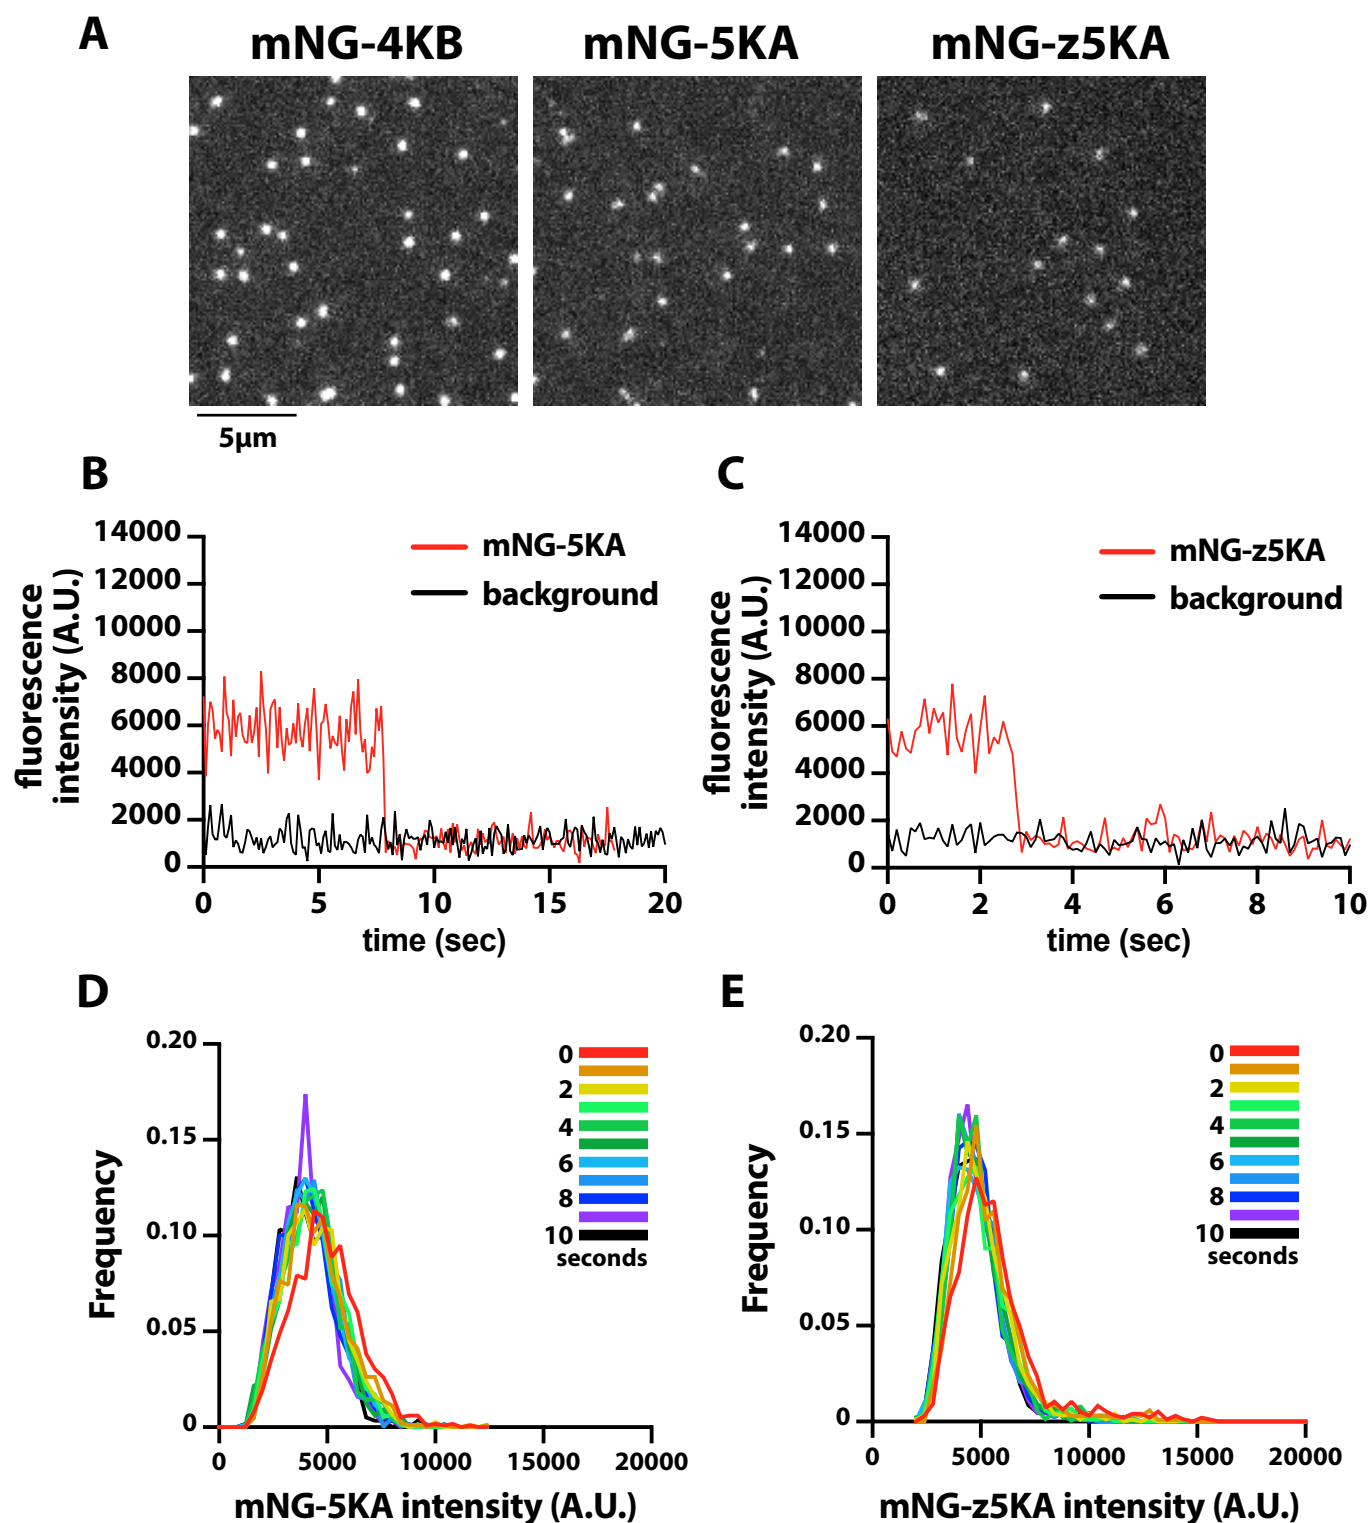

Supplement: supp [file elife_poa_e73747_Figure_1_figure_supplement_4.pdf › elife_poa_e73747_Figure_1_figure_supplement_4.pdf]

# Figure 2–figure supplement 1

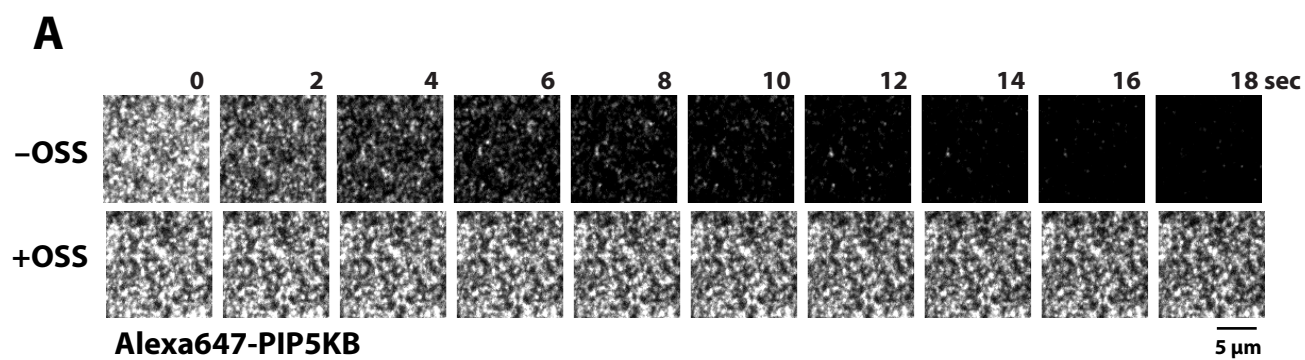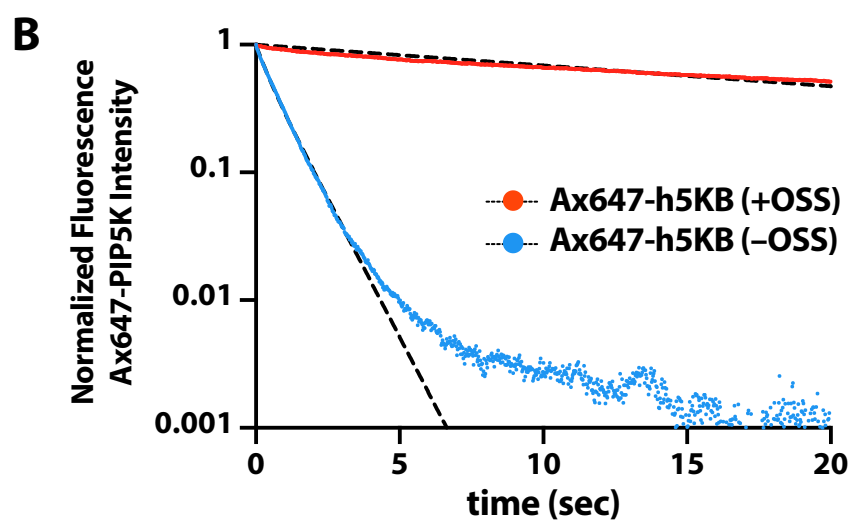

Supplement: supp [file elife_poa_e73747_Figure_2_figure_supplement_1.pdf › elife_poa_e73747_Figure_2_figure_supplement_1.pdf]

## Figure 2-figure supplement 2

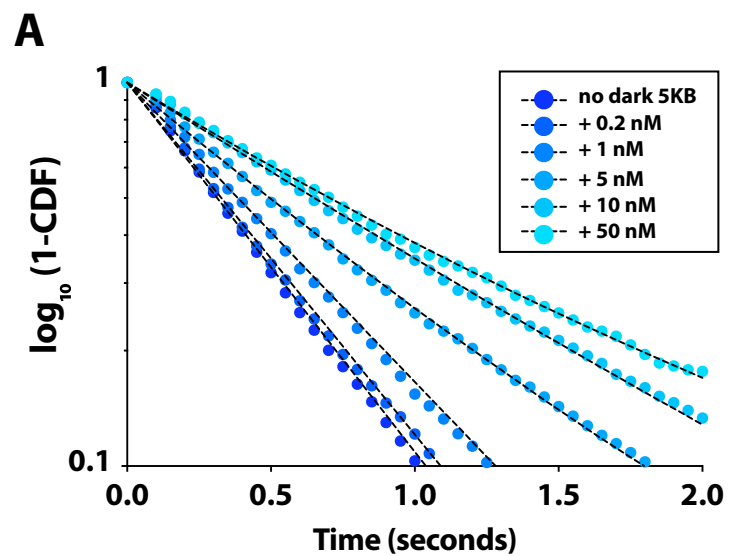

Supplement: supp [file elife_poa_e73747_Figure_2_figure_supplement_2.pdf › elife_poa_e73747_Figure_2_figure_supplement_2.pdf]

# Figure 2–figure supplement 3

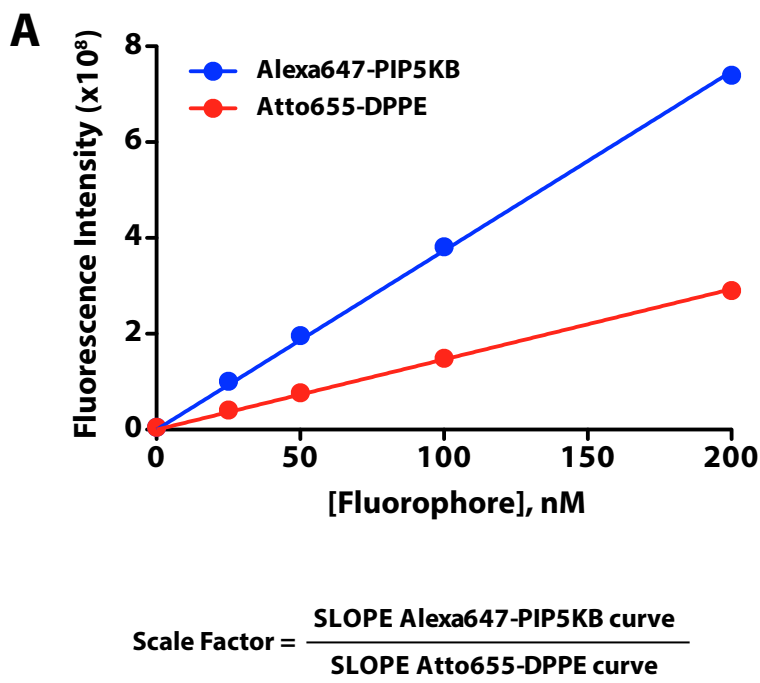

Supplement: supp [file elife_poa_e73747_Figure_2_figure_supplement_3.pdf › elife_poa_e73747_Figure_2_figure_supplement_3.pdf]

Figure 3–figure supplement 1

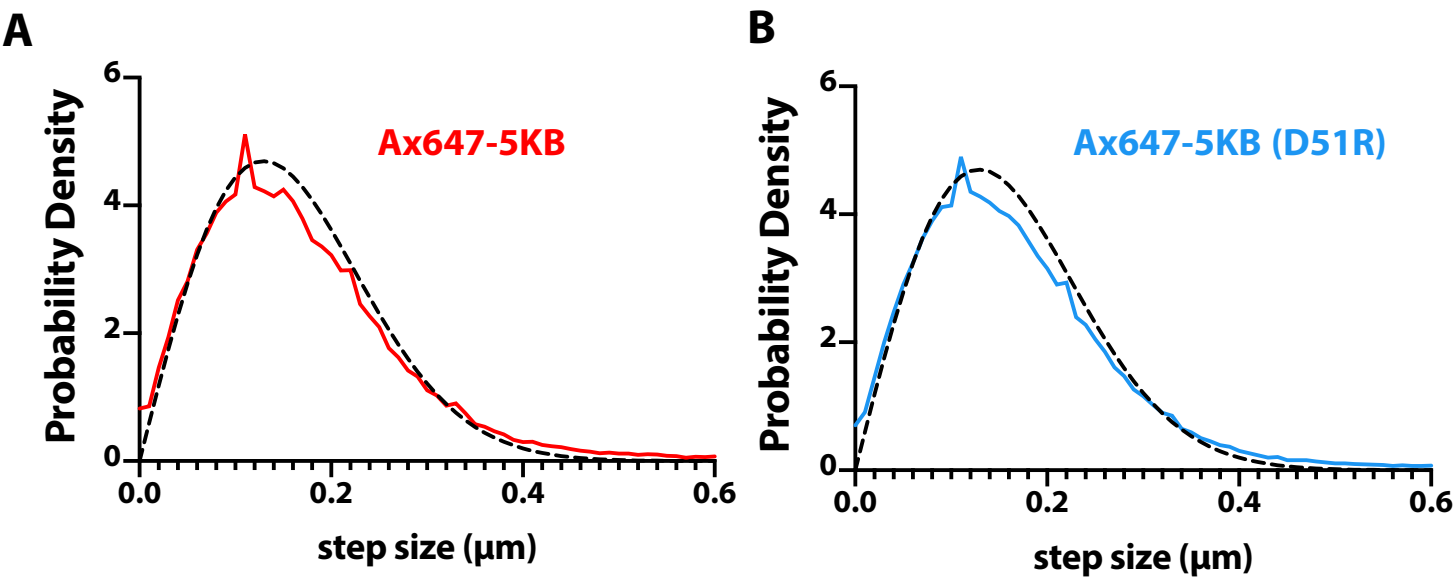

Supplement: supp [file elife_poa_e73747_Figure_3_figure_supplement_1.pdf › elife_poa_e73747_Figure_3_figure_supplement_1.pdf]

# Figure 4–figure supplement 1

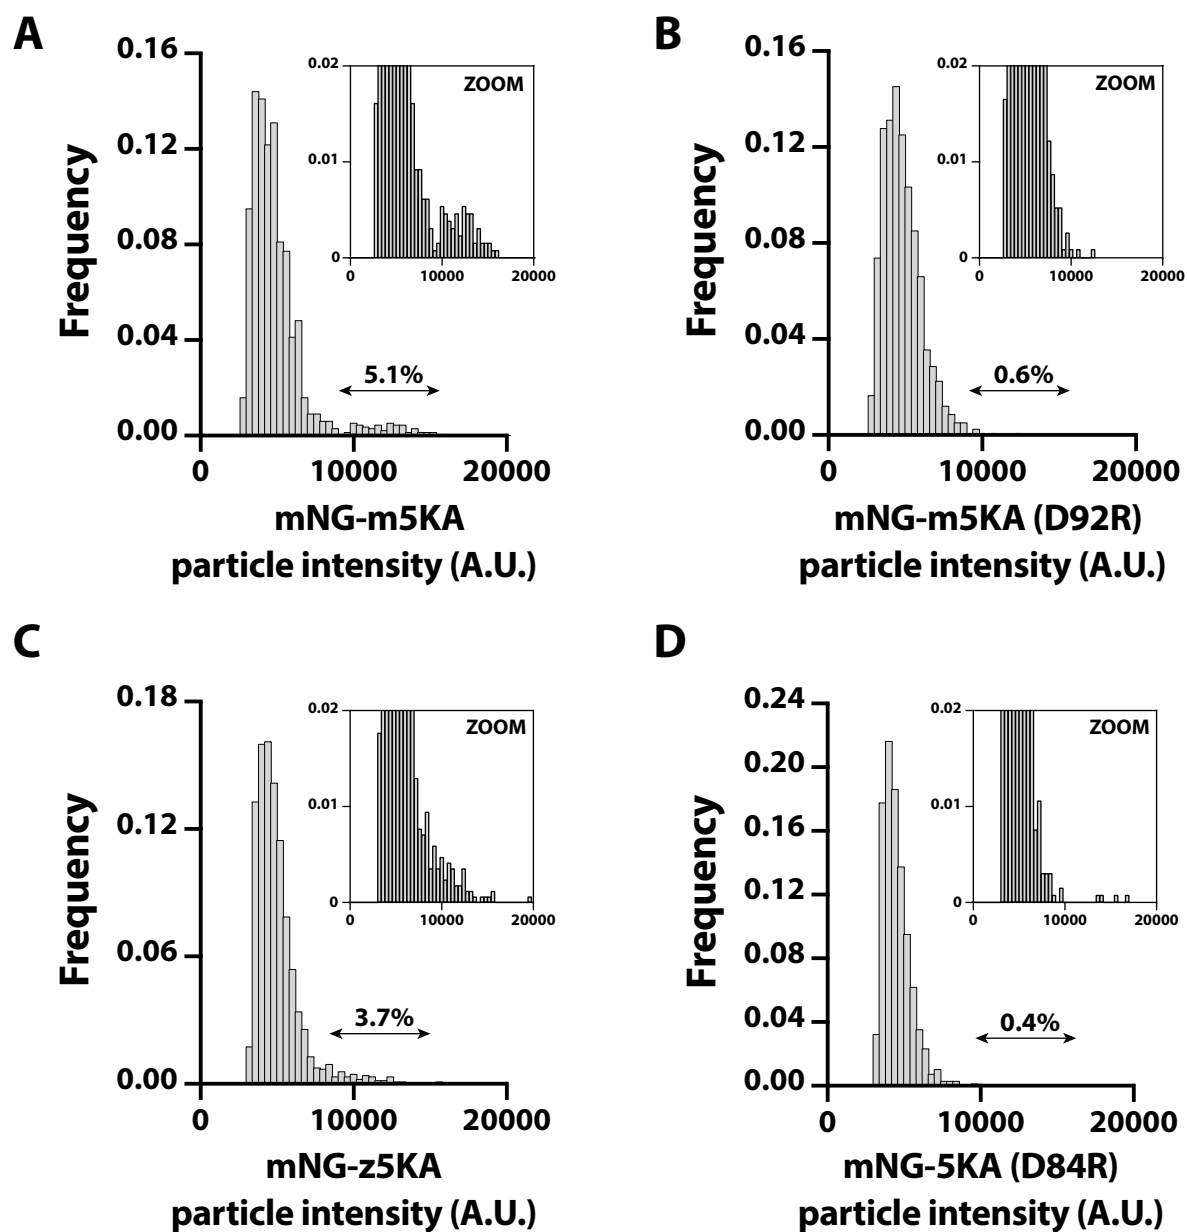

Supplement: supp [file elife_poa_e73747_Figure_4_figure_supplement_1.pdf › elife_poa_e73747_Figure_4_figure_supplement_1.pdf]

Figure 5–figure supplement 1

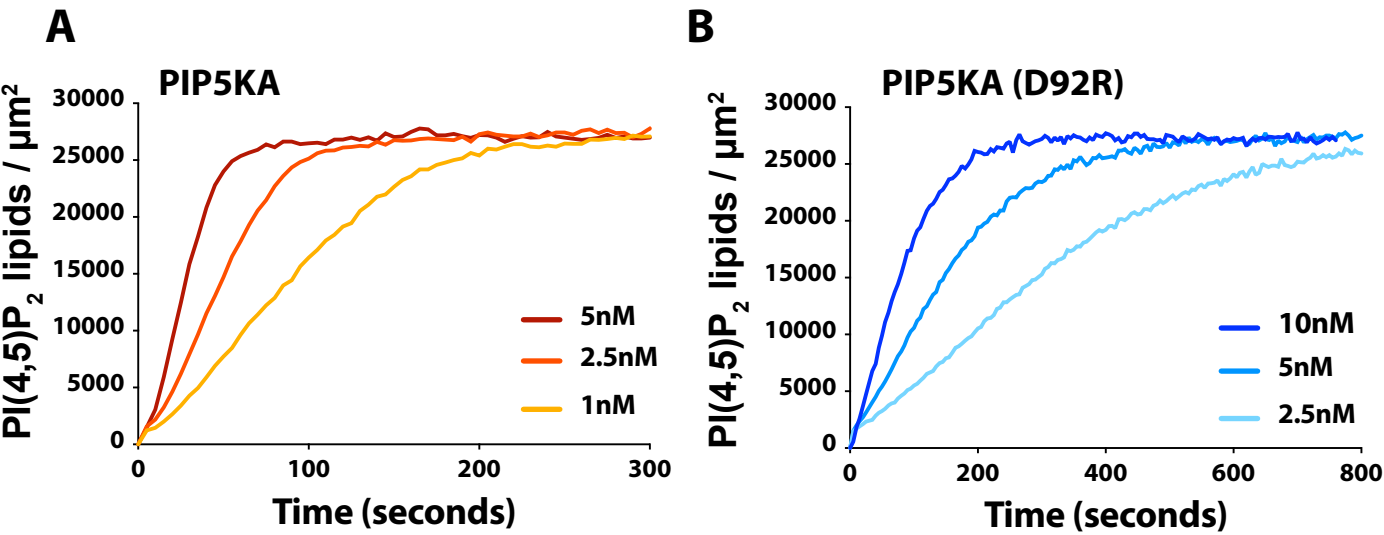

Supplement: supp [file elife_poa_e73747_Figure_5_figure_supplement_1.pdf › elife_poa_e73747_Figure_5_figure_supplement_1.pdf]

Figure 5–figure supplement 2

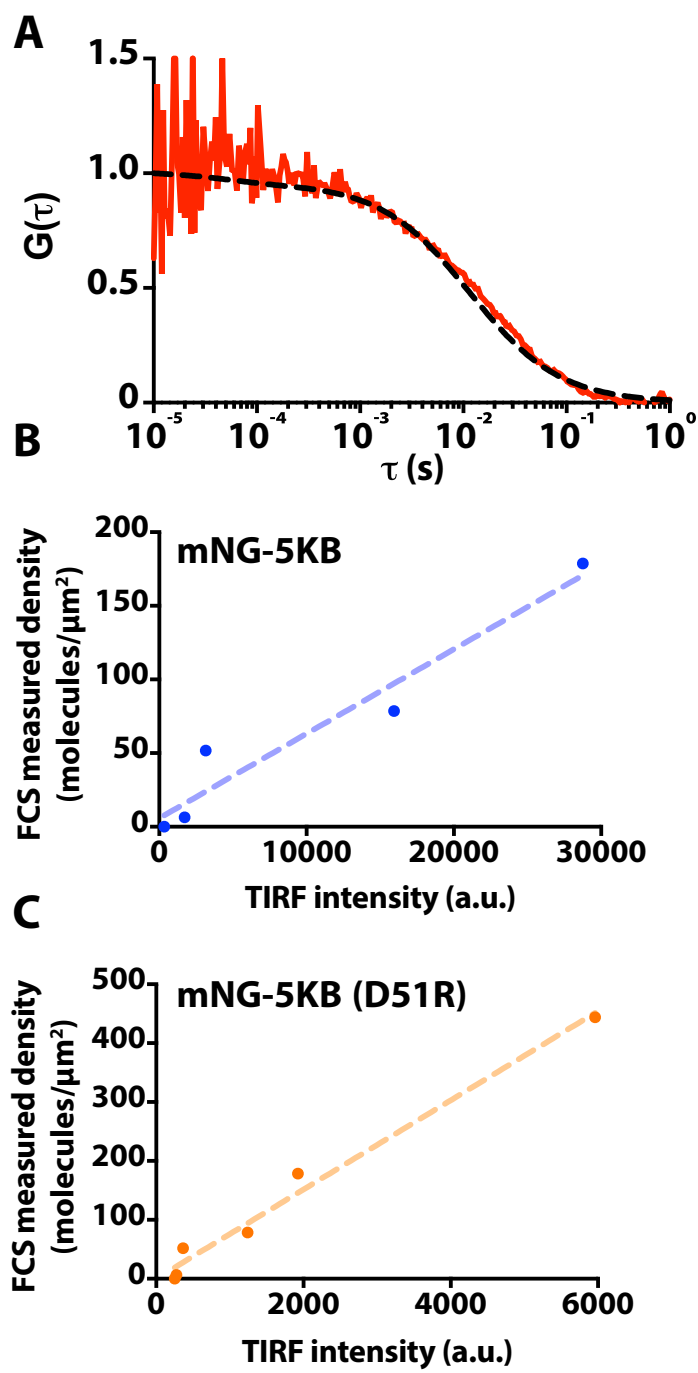

Supplement: supp [file elife_poa_e73747_Figure_5_figure_supplement_2.pdf › elife_poa_e73747_Figure_5_figure_supplement_2.pdf]
